# Supplementary material for: Genome-wide CRISPR screening reveals genes essential for cell viability and resistance to abiotic and biotic stresses in Bombyx mori
Source: HighWire-hosted journal article supplement (doi:10.1101/gr.249045.119), 2020-05-01
Supplement: Supplemental_Figures.pdf.pdf [file Supplemental_Figures.pdf.pdf]

## Supplemental Figures

Supplemental Fig S1

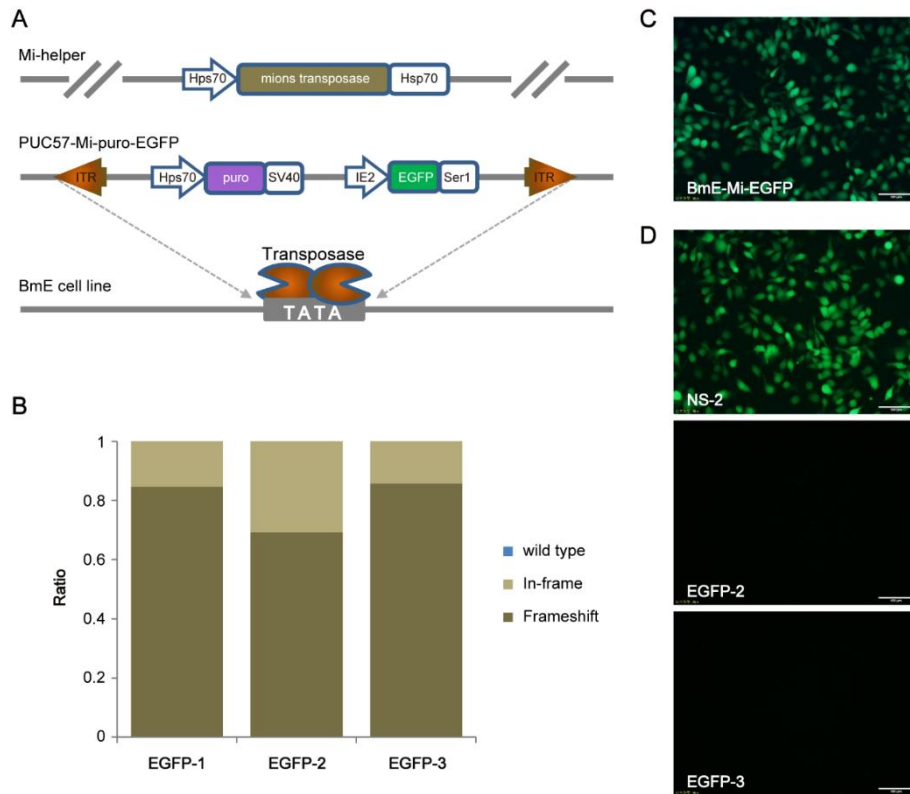

**Supplemental Fig S1.** The *Minos* delivery method and *piggyBac*-CRISPR system in *B. mori* cells.

**(A)** Schematics of *Minos* delivery vectors PUC57-Mi-puro-EGFP and Mi-helper. **(B)** Sanger sequencing analysis of the ratio of in-frame/frameshift for EGFP-1 (left), EGFP- 2 (middle), and EGFP-3 (right) target regions of BmE-Mi-EGFP cells. **(C)** Fluorescent images of BmE-Mi-EGFP cells. **(D)** Fluorescent images of BmE-Mi-EGFP knockout experiments.

Supplemental Fig S2

sgRNA 1  
ATGGTGAGCAAGGGCGAGGAGCTGTTCACCGGGGTGGTGCCCATCCTGGT  
sgRNA 2  
CGAGCTGGACGGCGACGTAAACGGCCACAAGTTCAGCGTGTCCGGCGAGG  
sgRNA 3  
GCGAGGGCGATGCCACCTACGGCAAGCTGACCCTGAAGTTCATCTGCACC  
ACCGGCAAGCTGCCCCGTGCCCTGGCCCACCCTCGTGACCACCCTGACCTAC  
GGCGTGCAAGTGTTCAGCCGCTACCCCGACCACATGAAGCAGCACGACTT  
CTTCAAGTCCGCCATGCCCCGAAGGCTACGTCCAGGAGCGCACCATCTTCTT  
CAAGGACGACGGCAACTACAAGACCCGCGCCGAGGTGAAGTTCGAGGGC  
GACACCCTGGTGAACCGCATCGAGCTGAAGGGCATCGACTTCAAGGAGGA  
CGGCAACATCCTGGGGCACAAGCTGGAGTACAACACTACAACAGCCACAACG  
TCTATATCATGGCCGACAAGCAGAAGAACGGCATCAAGGTGAACTTCAAGA  
TCCGCCACAACATCGAGGACGGCAGCGTGCAGCTCGCCGACCACTACCAG  
CAGAACACCCCCATCGGCGACGGCCCCGTGCTGCTGCCCGACAACCACTA  
CCTGAGCACCCAGTCCGCCCTGAGCAAAGACCCCAACGAGAAGCGCGATC  
ACATGGTCCTGCTGGAGTTCGTGACCGCCGCCGGGATCACTCTCGGCATGG  
ACGAGCTGTACAAGTAA

**Supplemental Fig S2.** Design of three sgRNAs in the coding region of EGFP.

**Supplemental Fig S3**

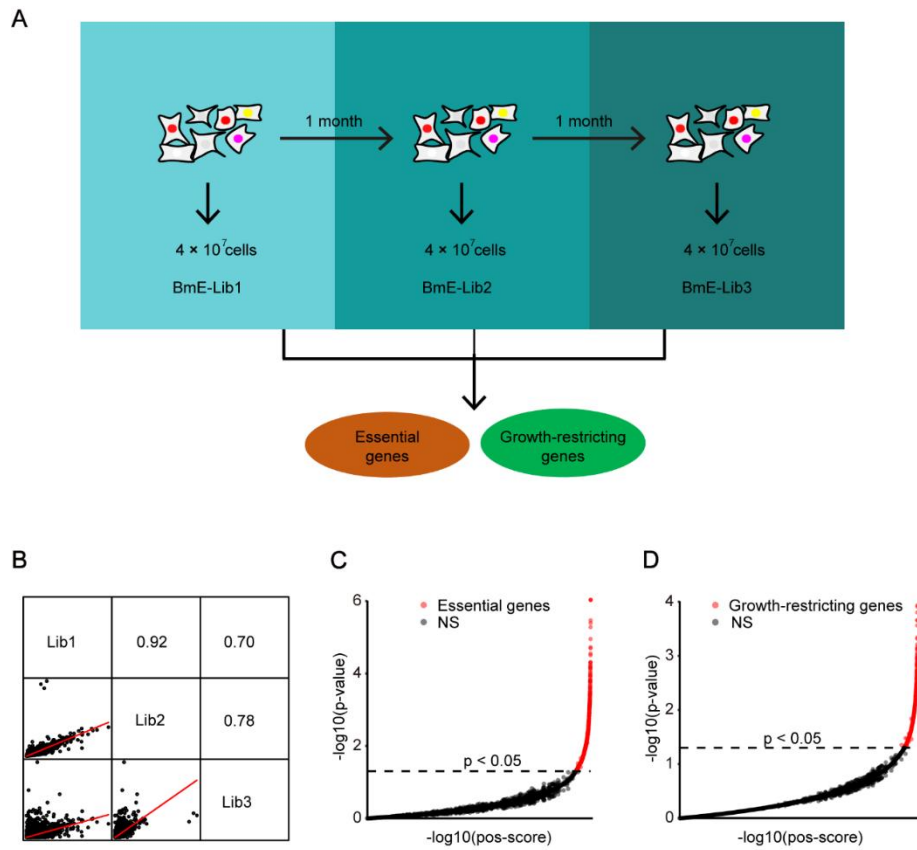

**Supplemental Fig S3.** Screening of essential and growth-restricting genes in the BmE cell line.

(**A**) Flowchart for screening essential and growth-restricting genes in BmE cells. (**B**) Correlation analysis of BmE-Libs among three time points. (**C**) Screening of essential genes based on the MAGeCK method (p-value < 0.05). (**D**) Screening of growth-restricting genes based on the MAGeCK method (p-value < 0.05).

**Supplemental Fig S4**

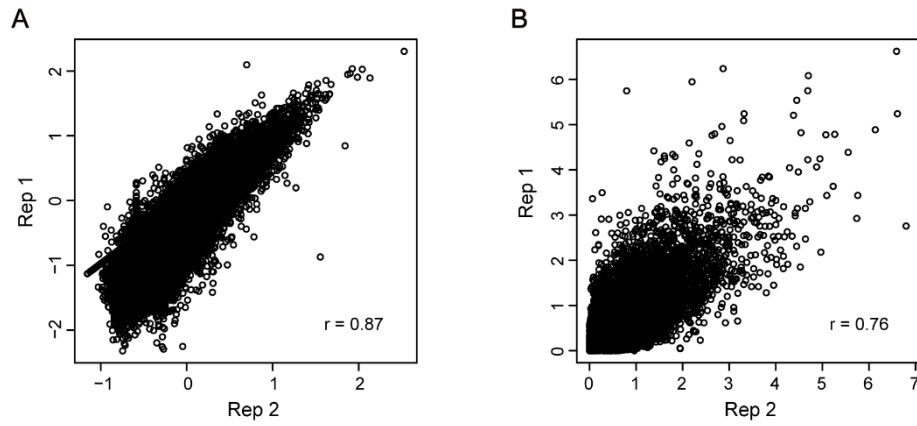

**Supplemental Fig S4.** The correlation analysis of two biological replicates for fitness screen.

(A) Plot documenting log10(fold-changes) of all sgRNAs included in two independent biological replicates for fitness screen. (B) Plot documenting log10(negative scores) for all genes included in two independent biological replicates for fitness screen.

## Supplemental Fig S5

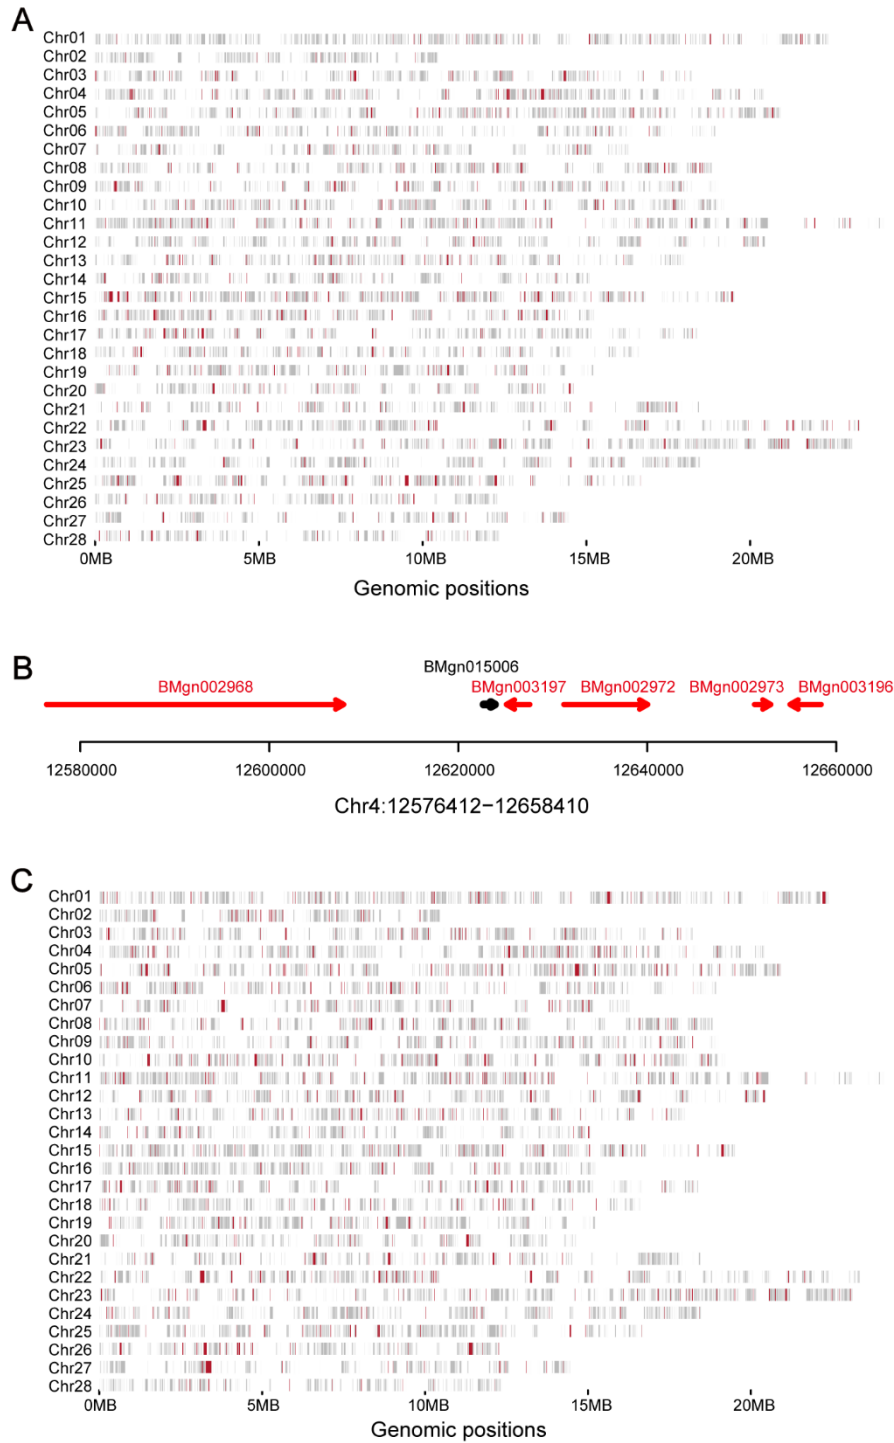

**Supplemental Fig S5. Chromosome distribution of essential and growth-restricting genes.**

Essential genes (A) and growth-restricting genes (C) distributed evenly on the chromosomes. red lines: essential or growth-restricting genes, grey lines: all genes. (B) The enriched region of essential genes in chromosome 4 (12576412–12658410) that contained a cluster of six genes.

**Supplemental Fig S6**

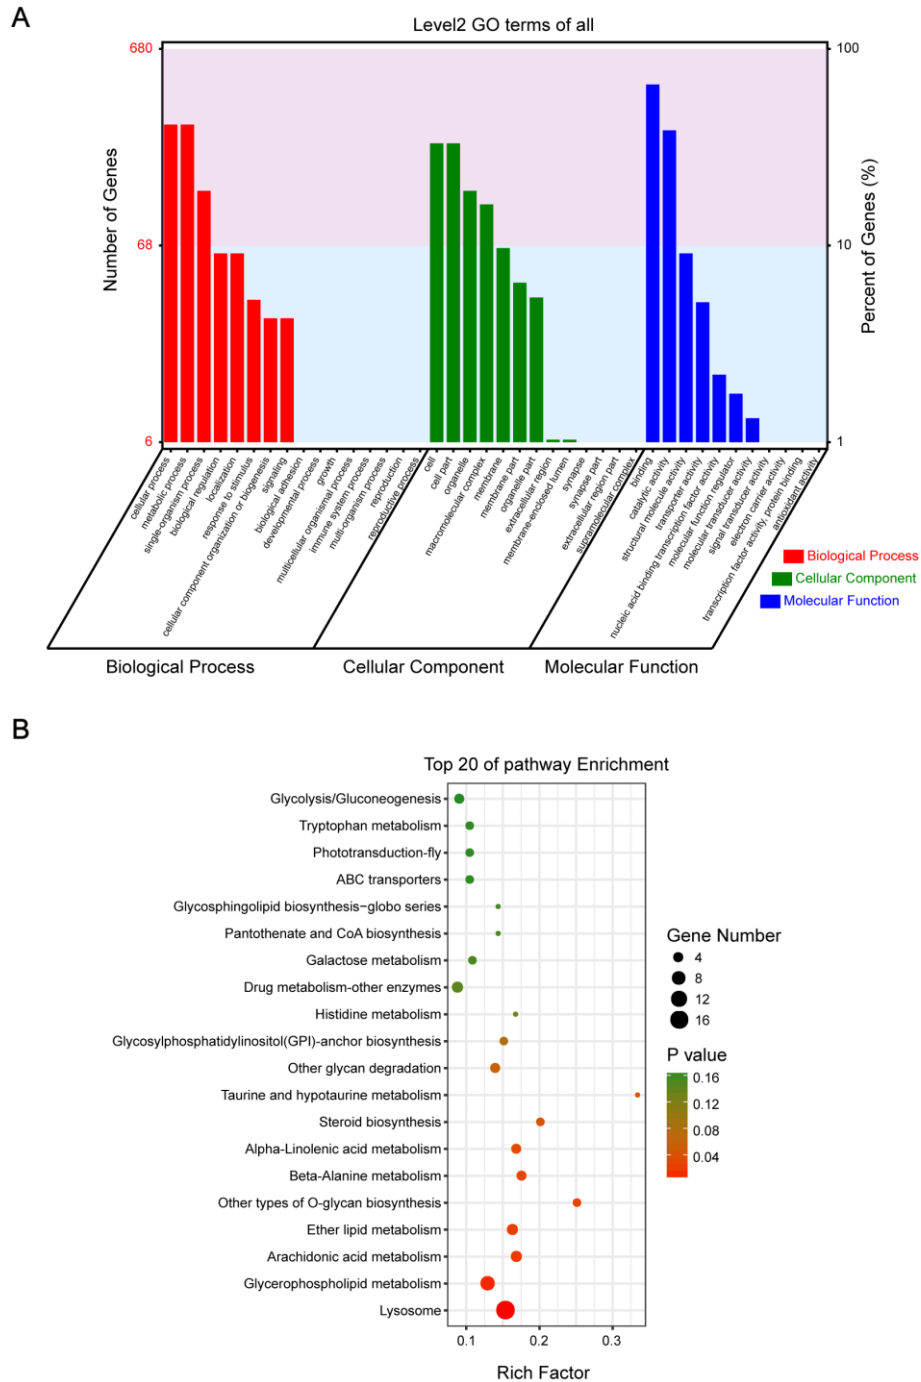

**Supplemental Fig S6.** Functional Analysis of essential and growth-restricting genes in BmE cells.

(A) GO classification of essential genes. (B) Top 20 KEGG pathway enrichment of growth-restricting genes.

**Supplemental Fig S7**

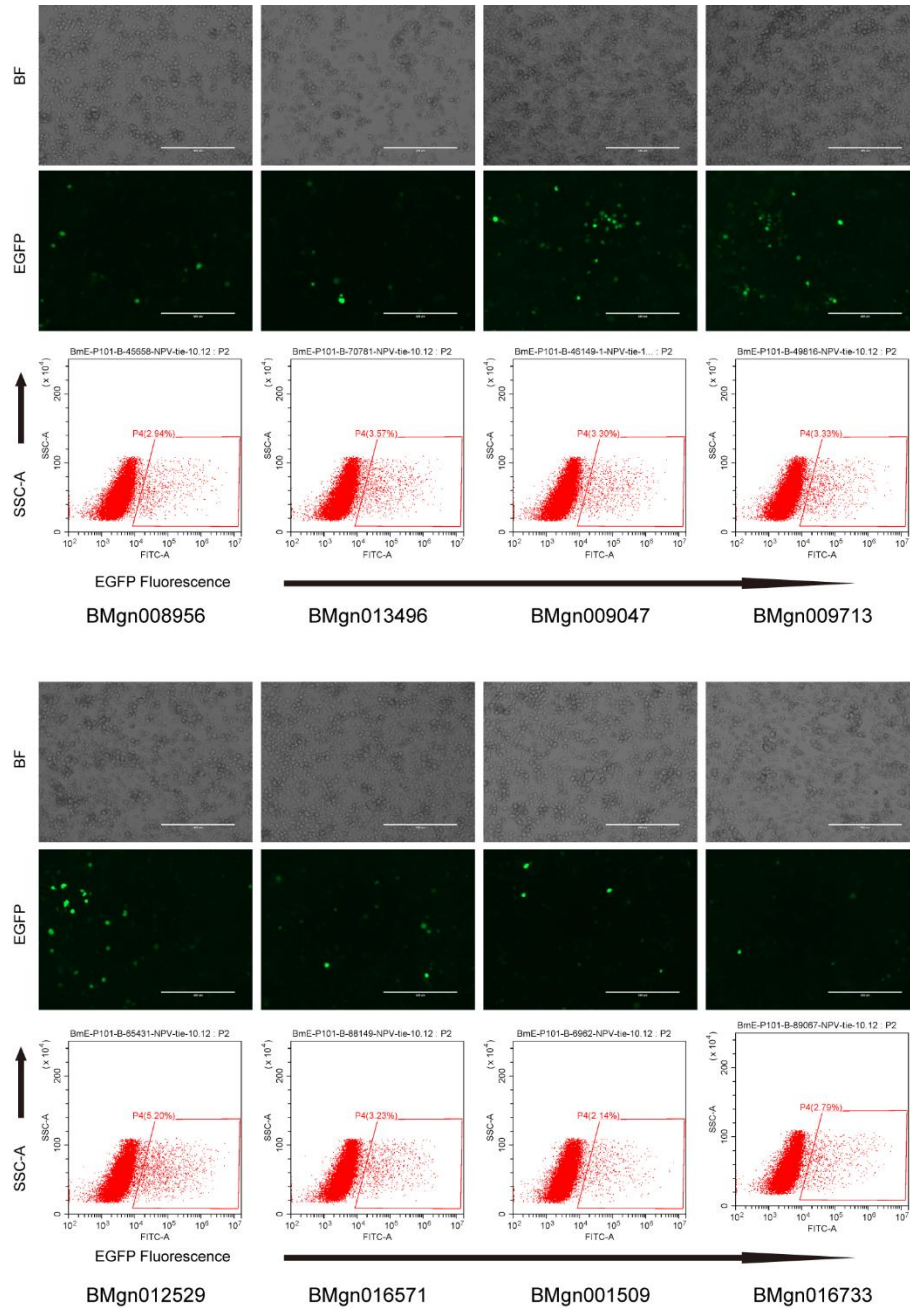

**Supplemental Fig S7.** Functional analysis of genes involved in *B. mori*-BmNPV interactions.

Fluorescent images analysis (upper) and flow cytometry analysis (lower) of knockout cells

infected with BmNPV at an MOI of 1. The gene numbers were indicated at the bottom.

Supplemental Fig S8

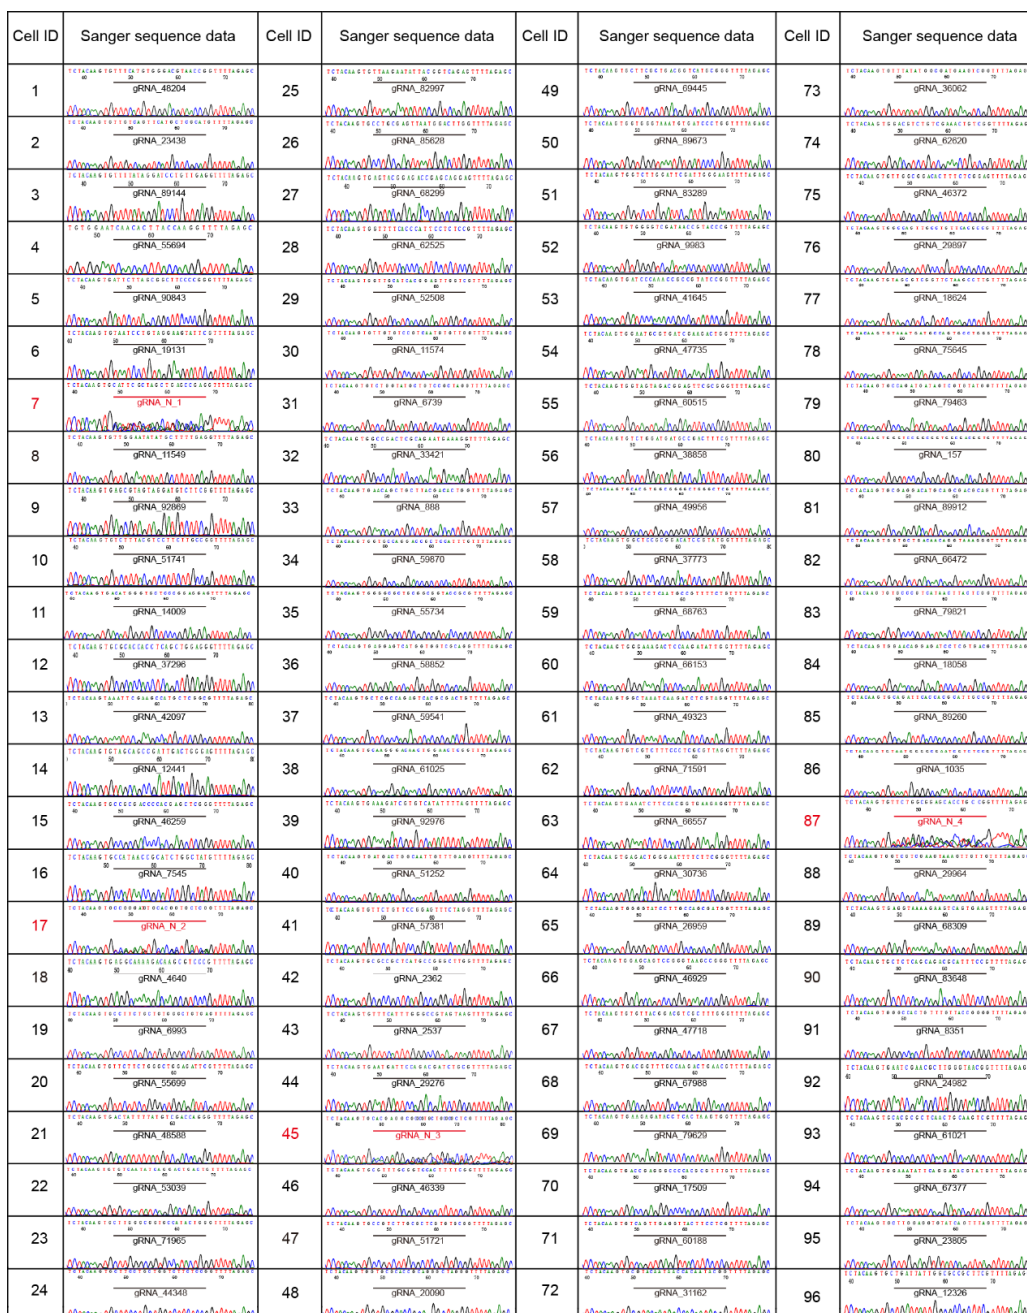

Supplemental Fig S8. A summary of Sanger sequencing results for single cells.

The four-color chromatogram of DNA sequencing results for each single cell is placed right to the cell ID. The chromatograms with single peaks and matched to the sgRNA sequences in the library are labeled with black line and sgRNA number in the library. The cell ID in red indicates that the single cell harbors more than one integrated sgRNAs.
