# Supplementary material for: Genome-wide CRISPR screening reveals genes essential for cell viability and resistance to abiotic and biotic stresses in Bombyx mori
Source: HighWire-hosted journal article supplement (doi:10.1101/gr.249045.119), 2020-05-01
Supplement: Supplemental_Materials.docx.docx [file Supplemental_Materials.docx.docx]

**Supplemental Materials**

**Materials and methods**

***Design and construction of the piggyBac CRISPR vector***A3-helper (the *piggy*Bac transposase expression vector), pBac-Modified, psl1180-hr3-hsp70-IE1 and PUC57-IE2-Zeocin-Ser1PA were from stocks stored in our laboratory. The *hsp70* promoter was PCR amplified from psl1180-hr3-hsp70-IE1 using PrimeSTAR® Max DNA Polymerase (Takara, Japan). The pUC57-hr3-hsp70-Cas9-sv40 was constructed by replacing the *A4* promoter in pUC57-hA4-Cas9 ([Ma et al. 2014](#_ENREF_11)) with the *hsp70* promoter. pUC57-U6-gRNA(*Aar*I) was constructed by replacing the *Bbs*I restriction site in pUC57-gRNA ([Ma et al. 2014](#_ENREF_11)) with an *Aar*I restriction site. The CRISPR library delivery vector, pB-CRISPR, was constructed with the following process. The PUC57-IE2-Zeocin-Ser1PA was cloned into the *Age*I/*Asc*I site of the pBac-Modified vector to generate pB-Modified{IE2-Zeocin-Ser1PA}. The hr3-hsp70-Cas9-sv40 cassette was PCR amplified from pUC57-hr3-hsp70-Cas9-sv40 using PrimeSTAR® Max DNA Polymerase and inserted into the *Asc*I site of pB-Modified{IE2-Zeocin-Ser1PA} using Gibson Assembly Master Mix (New England Biolabs, NEB, America) according to the manufacturer’s instructions to construct pB-Modified{IE2-Zeocin-Ser1PA}{hr3-hsp70-Cas9-SV40}. pUC57-U6-gRNA(AarI) was cloned into the *Nhe*I/*Asc*I site of pB-Modified {IE2-Zeocin-Ser1PA}{hr3-hsp70-Cas9-SV40} to generate the vector pB-Modified{IE2-Zeocin-Ser1PA}{U6-gRNA(AarI)}{hr3-hsp70-Cas9-SV40}, named pB-CRISPR. Guiding sequences of EGFP-1, EGFP-2, EGFP-3, NS-1, and NS-2 were synthesized as oligonucleotides (The Beijing Genomics Institute, BGI, China) to construct pB-CRISPR-EGFP-1, pB-CRISPR-EGFP-2, pB-CRISPR-EGFP-3, pB-CRISPR-NS-1, and pB-CRISPR-NS-2 using library construction methods.

***Generation of BmE-Mi-EGFP cells***The coding sequence of the puromycin resistance gene was codon optimized and fused to a triple Flag tag and an HA tag. The *hsp70* promoter, puromycin resistance gene, sv40 *poly(A)*, *IE2* promoter and Ser1PA were linked in turn between the *Minos* inverted terminal repeats (ITR) and the entire sequence (Supplemental sequences) was synthesized and inserted into pUC57-T-simple using Genscript services (America). The resulting plasmid was named PUC57-Mi-puro. To generate the PUC57-Mi-puro-EGFP vector, the coding sequence of EGFP was PCR amplified and cloned into the *Age*I/*Kpn*I site of PUC57-Mi-puro. The coding sequence of the *Minos* transposase gene expression cassette ([Metaxakis et al. 2005](#_ENREF_13)) was synthesized and inserted into pUC57-T-simple using Genscript services and the plasmid named Mi-helper.

To generate the BmE-Mi-EGFP cells, PUC57-Mi-puro-EGFP and Mi-helper were co-transfected into BmE cells. After two months of selection with puromycin (0.5 ug/ml, BBI Life Sciences, China), the BmE-Mi-EGFP cells stably integrated with EGFP were established.

***The B. mori sgRNA library design*** The genomic sequences and all exons of *B. mori* were retrieved from the KAIKObase database (<http://sgp.dna.affrc.go.jp/KAIKObase/>). The *S. pyogenes* Cas9 sgRNAs in this report were designed using the CasFinder method. To design the genome wide sgRNA library, all the sgRNAs of all exons in *B. mori* were designed firstly. gRNAs were then chose using the following criterions: first, the sgRNA should located within the first half of the coding region; second, the sgRNA sequence should be unique at the seed region (12 bp downstream of PAM) and as unique as possible in the non-seed region. At last 94,000 sgRNAs were designed. In order to improve the U6 transcription efficiency, all sgRNAs had a 5´G added. All sgRNAs selected to construct the library were listed in Supplemental Table S2.

***The oligonucleotides synthesized on the arrays****.* The library of sgRNAs were encoded within 70-nt oligonucleotides and synthesized on the 94K arrays using the services of Beijing Genomics Institute (BGI, China). The oligonucleotide sequence was 5´-TACAA AATAT CGTGC TCTAC AAGTG NNNNN NNNNN NNNNN NNNNN GTTTT AGAGC TAGAA ATAGC AAGTT-3´.

***The construction of sgRNA library****.* The DGP-1 fragment (*U6* promoter) was PCR amplified from pB-CRISPR using primers KU-1R and DG-1R. The pool of sgRNA oligonucleotides was amplified by PCR using primers DP-2F and DP-2R and named DGP-2 fragments (multiple sgRNAs). The DGP-3 fragment (sgRNA scaffolds) was amplified by PCR from pB-CRISPR using primers DG-3F and KU-1F. These three fragments were linked together using overlap PCR to generate the DGP-4 fragments (U6-sgRNA library). All the PCR amplified reactions were using PrimeSTAR® Max DNA Polymerase (Takara, Japan). The DGP-4 fragments were then cloned into the *Asc*I/*Nhe*I site of pB-CRISPR vector to construct the CRISPR knockout plasmid library (pB-CRISPR library) according to the following protocol.

200 ng of the gel-purified DGP-4 fragments and 200 ng of the pB-CRISPR vector were mixed and ligated in the 50 µL T4 ligation reaction (NEB) according to the instructions. 1 µL of the ligation reaction was transformed into 50 µL of E. coli HST08 Premium Electro-Cells (Takara , Japan) using a Gene Pulser Xcell (BioRad, America) according to the manufacturer’s instructions. To ensure the diversity of the sgRNA library, 13 parallel electrotransformations were performed and more than 108 clones were grown on 240 petri dishes (90 x 15 mm) with ampicillin selection, which resulted in > 1,000× library coverage. All the clones were collected and the plasmid library was extracted using a QIAprep Spin Miniprep Kit (Qiagen, Germany). All the restriction enzymes used in this article were purchased from the NEB (America).

***Cell culture and transduction****.* The *B. mori* embryonic cell line BmE was established and stored in our laboratory and cultured using Grace's Insect Medium (Gibco, America) containing 10% fetal bovine serum (FBS; Gibco, America), penicillin, and streptomycin (complete media) at 27℃. The culture medium was changed every 3 days. The mechanism of *piggy*Bac was “cut and paste” and the integration efficiency is ~25% under standard transformation condition in the BmE cells. The integration efficiency of *piggy*Bac transposons can be reduced by decreasing the amount of donor plasmids. To ensure most library cells integrated only a single sgRNA, we chose the optimal transfection conditions by reducing the amount of transfected donor plasmids. For each 25 cm2 flask (Corning, America), the pB-CRISPR library was co-transfected with A3-helper using X-tremeGENE HP DNA Transfection Reagent (Roche, Switzerland) according to the manufacturer’s instructions. Before transfection, the complete media was removed from BmE cells, then 1.6 mL Grace's Insect Medium without FBS, penicillin, and streptomycin (basal media) were added to each flask. pB-CRISPR library vectors and A3-helper were mixed at a ratio of 1/1 (mass, 1ug/1ug) and diluted in 800 µL basal media. 10 µL of X-tremeGENE HP DNA Transfection Reagent diluted in 800 µL basal media, 5 minutes later, transferred to the mixture of plasmids and basal media. After 20 minutes incubated at room temperature, the whole mixture was transferred into the 25 cm2 flask with BmE cells cultured using basal media. 6 h after transfected, the media was exchanged to the complete media. To achieve ~ 2,000× library coverage, 150 parallel transfections were performed using the same reaction. After co-transfection, the cells were selected with 200 μg/ml Zeocin™ Selection Reagent (Gibco, America) for two months to ensure the CRISPR system was stably integrated into the genome of the BmE cells. Finally, the BmE genome-scale CRISPR/Cas9 knockout library was established and named BmEGCKLib.

***Single cell sequence****.* The 96 single cells of our cell library were collected through micromanipulation. The whole-genomic DNA of each cell was amplified individually using the multiple displacement amplification (MDA, Qiagen, Germany). Afterwards, the sgRNA regions of each single cell was PCR amplified using primers gD-1F and gD-1R (Supplemental Table S1). All the PCR products were subjected to Sanger sequencing through a commercial service (BGI, China).

***Screening of essential or growth-restricting genes****.* After the library was established, 4 × 107 BmEGCKLib cells were immediately harvested and named the ‘BmE-Lib1’ group. After one and two months of additional culture, another set of 4 × 107 cells were collected and named ‘BmE-Lib2’ and ‘BmE-Lib3’, respectively. The genomic DNA was extracted from each group and the sgRNAs were analyzed by second-generation sequencing (Mega Genomic, China) to identify essential genes in *B. mori*.

***Screening of genes responsible for temperature challenge****.* For the screening of genes responsible for temperature challenging, three sets of 4 × 107 cells of the BmEGCKLib in complete medium were exposed for 20 days to different temperature points of 4℃ as a low temperature test, 30℃ as a high temperature test, and 27℃ as a control. The surviving cells were then collected and the genomic DNA were extracted and sgRNAs were analyzed by second-generation sequencing (Mega Genomic, China).

***Screening of genes involved in host-pathogen interactions***. 4 × 107 cells of the BmEGCKLib were cultured in Grace's Insect Medium containing 10% FBS supplemented with BmNPV (with an EGFP tag, stored in our laboratory) with MOI =1 for four rounds of infection (infected once every 2 days) to ensure that most cells received one virus. The cells that survived were harvested and sorted by flow cytometry (MoFlo XDP flow cytometry, Beckman Coulter, America) into two populations by green fluorescence. After sorting, the EGFP-negative cells were used for DNA extraction and sgRNA sequencing.

***Pooled sgRNA sequences and data analysis****.* All of the genomic DNA extracted from the cell libraries was PCR amplified using PrimeSTAR® Max DNA Polymerase (Takara, Japan) and barcoded primers. The primer sequences are provided in Supplemental Table S1. The PCR products were gel-purified using Gel Extraction Kit (Omega Bio-tek, America) and sequenced by Illumina using Mega Genomic services (China).

The raw data were uploaded to a server in our laboratory and filtered using the trimmomatic-0.35.jar trimming tool. The paired sequences were then spliced using flash software. The completed reads were aligned to the index, the sgRNA design in this report, using the bowtie2 to calculate the number of reads for each sgRNA. In order to ensure the maximum reliability of the data, the sgRNAs with number of reads ranking in the last 10% were excluded from the data prior to the MAGeCK analysis. The KEGG pathways enrichment was classified using the KOBAS 3.0 method (<http://kobas.cbi.pku.edu.cn/anno_iden.php>) ([Xie et al. 2011](#_ENREF_16); [Ai and Kong 2018](#_ENREF_2)). The Gene Ontology (GO) analysis was performed using OmicShare tools (http://www.omicshare.com/tools/Home/Soft/osgo). The BmE cell line and silk gland (SG) RNAseq expression data have been published previously and stored in the NCBI Short Read Archive (http://www.ncbi.nlm.nih.gov/sra/) under accession number SRP100811([Zhang et al. 2017](#_ENREF_17)). The raw data was download from NCBI and the gene expression levels were analyzed using Cuffdiff ([Trapnell et al. 2012](#_ENREF_15)) (Supplemental Table S5). The overlap of essential genes between *B. mori* and other eight organisms was performed using the DGE method ([Zhang and Lin 2009](#_ENREF_18)). We also analyzed the intersection of 1000 random genes with *B. mori* orthologs of essential genes in the eight species according the same approach. The data for the eukaryotic and prokaryote organisms used in this report were reported previously: *Homo sapiens* ([Lek et al. 2016](#_ENREF_9)), *Mus musculus* ([Liao and Zhang 2007](#_ENREF_10)), *Drosophila melanogaster* ([Spradling et al. 1999](#_ENREF_14)), *Saccharomyces cerevisiae* ([Giaever et al. 2002](#_ENREF_5)), *Danio rerio* ([Amsterdam et al. 2004](#_ENREF_3)), *Caenorhabditis elegans* ([Kamath et al. 2003](#_ENREF_8)), *Arabidopsis thaliana* ([Meinke et al. 2008](#_ENREF_12)), and *Bacillus thuringiensis* ([Bishop et al. 2014](#_ENREF_4)). The subcellular localization of genes was performed using the LocTree3 method (<https://www.rostlab.org/services/loctree3/>) ([Goldberg et al. 2014](#_ENREF_6)).

***Flow cytometry analysis, fluorescence imaging, and Sanger sequencing of BmE-Mi-EGFP cells****.* After co-transfected with pB-CRISPRs and A3-helper, the BmE-Mi-EGFP cells were selected using zeocin (200 ug/ml) for two months. To test the knockout efficacy of the pB-CRISPRs, the cells were collected and flow cytometry analysis performed using a MoFlo XDP flow cytometry (Beckman Coulter, America). The light microscopy and fluorescence images of the cells were captured using an EVOS FL Auto microscope (Thermo Scientific, America). In addition, the genomic DNA of the cells was extracted and the sgRNA target sites were amplified by PCR use the primers described in the Supplemental Table S1. The PCR products were then cloned into pMD™19-T Vector Cloning Kit (Takara, Japan) for Sanger sequencing by Beijing Genomics Institute (BGI, China).

***Generation of the cell lines knockout the anti-BmNPV genes****.* Guiding sequences of 11 genes identified in BmNPV screening were synthesized as oligonucleotides (The Beijing Genomics Institute, BGI, China) to construct the knockout vectors using library construction methods. To generate the knockout cell lines, the vectors and A3-helper were co-transfected into BmE cells. After two months of selection with zeocin (200 ug/ml, Gibco, America), the 11 knockout cell lines were established.

***Validation the effectiveness of our screening used in host-pathogen interactions****.* The knockout cell lines were infected with BmNPV at an MOI of 1. Then validating the effectiveness of genes identified playing anti-BmNPV roles. First, all the cell lines were imaged by fluorescent microscopy (EVOS FL Auto microscope, Thermo Scientific, America). Second, all the cell lines were analyzed the percentage of EGFP positive cells (cells infected with BmNPV) using the Flow cytometry (FCM, CytoFLEX, Beckman Coulter, America). Third, the viral DNA levels were measured among all the knockout cell lines infected with BmNPV. The cell lines infected with BmNPV were harvested 72h after infection, and the genomic DNA were extracted. The virus DNA levels were measured by the *GP64* gene and the virus DNA levels were normalized to *B. mori* *GAPDH* gene as previously described ([Hua et al. 2018](#_ENREF_7)). The primers were list in Supplemental Table S1.

**Supplemental Table legends**

**Supplemental Table S1** Primers used in this article.

**Supplemental Table S2** List for sgRNA library in this article.

**Supplemental Table S3** The correlation analysis of two biological replicates for essential screen under normal conditions.

**Supplemental Table S4** Screening of essential or growth-restricting genes.

**Supplemental Table S5** The expression level of essential and growth-restricting genes in BmE and silk gland.

**Supplemental Table S6** CRISPR screens to identify genes responsible for temperature challenging.

**Supplemental Table S7** CRISPR screens for *Bombyx mori* cells interaction with BmNPV.

**Supplemental sequences**

**>Mi-helper.**

Yellow *Hsp7*0 promoter

Gray Minos transposase

Brown *hsp70* term

CGAGAAATTTCTCTGGCCGTTATTCGTTATTCTCTCTTTTCTTTTTGGGTCTCTCCCTCTCTGCACTAATGCTCTCTCACTCTGTCACACAGTAAACGGCATACTGCTCTCGTTGGTTCGAGAGAGCGCGCCTCGAATGTTCGCGAAAAGAGCGCCGGAGTATAAATAGAGGCGCTTCGTCTACGGAGCGACAATTCAATTCAAACAAGCAAAGTGAACACGTCGCTAAGCGAAAGCTAAGCAAATAAACAAGCGCAGCTGAACAAGCTAAACAATCTGCAGTAAAGTGCAAGTTAAAGTGAATCAATTAAAAGTAACCAGCAACCAAGTAAATCAACTGCAACTACTGAAATCTGCCAAGAAGTAATTATTGAATACAAGAAGAGAACTCTGGGGGATCTGATCGATAATGGTTCGTGGTAAACCTATTTCTAAAGAAATCAGAGTATTGATTAGGGATTATTTTAAATCTGGAAAGACACTTACGGAGATAAGCAAGCAATTAAATTTGCCTAAGTCGTCTGTGCATGGGGTGATACAAATTTTCAAAAAAAATGGGAATATTGAAAATAACATTGCGAATAGAGGCCGAACATCAGCAATAACACCCCGCGACAAAAGACAACTGGCCAAAATTGTTAAGGCTGATCGTCGCCAATCTTTGAGAAATTTGGCTTCTAAGTGGTCGCAGACAATTGGCAAAACTGTCAAGCGAGAGTGGACGCGACAGCAATTAAAAAGTATTGGATATGGTTTTTATAAAGCCAAGGAAAAACCCTTGCTTACGCTTCGTCAAAAAAAGAAGCGTTTGCAATGGGCTCGGGAAAGGATGTCTTGGACTCAAAGGCAATGGGATACCATCATATTCAGCGATGAAGCTAAATTTGATGTTAGTGTCGGCGATACGAGAAAACGCGTCATCCGTAAGAGGTCAGAAACATACCATAAAGACTGCCTTAAAAGAACAACAAAGTTTCCTGCGAGCACTATGGTATGGGGATGTATGTCTGCCAAAGGATTAGGAAAACTTCATTTCATTGAAGGGACAGTTAATGCTGAAAAATATATTAATATTTTACAAGATAGTTTGTTGCCATCAATACCAAAACTATCAGATTGCGGTGAATTCACTTTTCAGCAGGACGGAGCATCATCGCACACAGCCAAGCGAACCAAAAATTGGCTGCAATATAATCAAATGGAGGTTTTAGATTGGCCATCAAATAGTCCAGATCTAAGCCCAATTGAAAATATTTGGTGGCTAATGAAAAACCAGCTTCGAAATGAGCCACAAAGGAATATTTCTGACTTGAAAATCAAGTTGCAAGAGATGTGGGACTCAATTTCTCAAGAGCATTGCAAAAATTTGTTAAGCTCAATGCCAAAACGAGTTAAATGCGTAATGCAGGCCAAGGGCGACGTTACACAATTCTAATCTAGAGATCTTCCATACCTACCAGTTCTGCGCCTGCAGCAATGGCAACAACGTTGCCCGGATCGAGGTCGACTAAGGCCAAAGAGTCTAATTTTTGTTCATCAATGGGTTATAACATATGGGTTATATTATAAGTTTGTTTTAAGTTTTTGAGACTGATAAGAATGTTTCGATCGAATATTCCATAGAACAACAATAGTATTACCTAATTACCAAGTCTTAATTTAGCAAAAATGTTATTGCTTATAGAAAAAATAAATTATTTATTTGAAATTTAAAGTCAACTTGTCATTTAATGTCTTGTAGACTTTTGAAAGTCTTACGATACAATTAGTATCTAATATACATGGGTTCATTCTACATTCTATATTAGTGATGATTTCTTTAGCTAGTAATACATTTTAATTATATTCGGCTTTGATGATTTTCTGATTTTTTCCGAACGGATTTTCGTAGACCCTTTCGATCTCATAATGGCTCATTTTATTGCGATGGACGGTCAGGAGAGCTCCACTTTTGAATTTCTGTTCGCAGACACCGCATTTGTAGCACATAGCCGGGACATCCGGTTTGGGGAGATTTTCCAGTCTCTGTTGCAATTGGTTTTCGGGAATGCGTTGCAGGCGCATACGCTCTATATCCTCCGAACGGCGCTGGTTGACCCTAGCATTTACATAAGGATCAGCAGCAAAATTTGCCTCTACTTCATTGCCCGGAATCACAGCAATCAGATGTCCCTTTCGGTTACGATGGATATTCAGGTGCGAACCGCACACAAAGCTCTCGCCGCACACTCCACACTGATATGGTCGCTCGCCCGTGTGGCGCCGCATATGGATCTTAAGGTCGTTGGACTGCACAAAGCTCTTGCTGCACATTTTGCAGGAGTACGGCCTTTGACCCGTGTGCAATCGCATGTGTCGCGCCAGCTTGTTCTGCGAAATAAACTAACGGGAATTCCTGCAGCCCGGGGGATCCGCGGCCGCATAGGCCACTAGTGGATCTGGATCCTCTAGAGTCGACCTCGAACGTTAACGTTAACGTAACGTTAACTCGAGGCCTCGAGGTCGACCTGCAGCCAAGCTTTGCGTACTCGCAAATTATTAAAAATAAAACTTTAAAAATAATTTCGTCTAATTAATATTATGAGTTAATTCAAA

**>PUC57-Mi-puro-EGFP**

Red Minos arms

Yellow *Hsp70* promoter

Pink puro coding sequence

Wathet blue 3×Flag- HA tag

Dark blue SV40PA

Brown *IE2* promoter

Crimson AgeI cutting site

Green EGFP coding sequence

Bottle green KpnI cutting site

Gray Ser1PA

AAGTGCTTGAAATGCTAAATGTTTTCAATTTTTCGCCATTAAGACAAGCCTACACAAATGCTTCTATAAATTATGCCAAGCACGTTAGCAGCTTCTACGAGCCCCAACCACTATTAATTCGAACAGCATGTTTTTTTTGCAGTGCGCAATGTTTAACACACTATATTATCAATACTACTAAAGATAACACATACCAATGCATTTCGTCTCAAAGAGAATTTTATTCTCTTCACGACGAAAAAAAAAGTTTTGCTCTATTTCCAACAACAACAAAAATATGAGTAATTTATTCAAACGGTTTGCTTAAGAGATAAGAAAAAAGTGACCACTATTAATTCGAACGCGGCGTAAGCTTACCTTAATCTCAAGAAGAGCAAAACAAAAGCAACTAATGTAACGGAATCATTATCTAGTTATGATCTGCAAATAATGCTGCAGCCTAGGCGAGAAATTTCTCTGGCCGTTATTCGTTATTCTCTCTTTTCTTTTTGGGTCTCTCCCTCTCTGCACTAATGCTCTCTCACTCTGTCACACAGTAAACGGCATACTGCTCTCGTTGGTTCGAGAGAGCGCGCCTCGAATGTTCGCGAAAAGAGCGCCGGAGTATAAATAGAGGCGCTTCGTCTACGGAGCGACAATTCAATTCAAACAAGCAAAGTGAACACGTCGCTAAGCGAAAGCTAAGCAAATAAACAAGCGCAGCTGAACAAGCTAAACAATCTGCAGTAAAGTGCAAGTTAAAGTGAATCAATTAAAAGTAACCAGCAACCAAGTAAATCAACTGCAACTACTGAAATCTGCCAAGAAGTAATTATTGAATACAAGAAGAGAACTCTGGGGGATCATGACCGAATACAAACCCACAGTGAGACTGGCCACTAGAGACGATGTTCCTAGAGCTGTCAGAACTTTGGCTGCCGCTTTCGCCGATTACCCAGCTACTAGACACACCGTTGACCCGGATAGACACATCGAAAGAGTCACCGAATTGCAGGAACTCTTCCTGACAAGAGTTGGTCTCGACATTGGAAAGGTCTGGGTGGCCGACGATGGAGCCGCTGTTGCTGTCTGGACAACTCCCGAATCGGTGGAAGCCGGCGCTGTTTTCGCCGAAATAGGTCCTAGAATGGCTGAATTGTCAGGTTCTAGACTCGCCGCTCAACAGCAAATGGAAGGACTGTTGGCCCCTCACAGACCAAAAGAACCGGCCTGGTTCCTCGCTACTGTGGGAGTTAGCCCAGATCACCAGGGTAAAGGACTGGGCTCCGCTGTGGTTTTGCCAGGAGTCGAAGCTGCTGAAAGAGCCGGCGTGCCGGCTTTCTTGGAAACCTCAGCCCCAAGAAACCTCCCGTTCTACGAAAGACTGGGCTTCACCGTGACAGCTGACGTCGAAGTGCCCGAAGGCCCTAGAACATGGTGCATGACTAGAAAACCTGGTGCTGACTACAAGGACGATGACGATAAAGATTATAAAGACGATGACGATAAAGACTATAAAGATGACGACGATAAATACCCCTACGACGTGCCTGATTACGCTCGGCCGCGACTCTAGATCATAATCAGCCATGCGGCCGCGACTCTAGACCACATTTGTAGAGGTTTTACTTGCTTTAAAAAACCTCCCACACCTCCCCCTGAACCTGAAACATAAAATGAATGCAATTGTTGTTGTTAACTTGTTTATTGCAGCTTATAATGGTTACAAATAAAGCAATAGCATCACAAATTTCACAAATAAAGCATTTTTTTCACTGCATTCTAGTTGTGGTTTGTCCAAACTCATCAATGTATCTTAAAGCTTATCGATACGCGTAGTCGACCATGATGATAAACAATGTATGGTGCTAATGTTGCTTCAACAACAATTCTGTTGAACTGTGTTTTCATGTTTGCCAACAAGCACCTTTATACTCGGTGGCCTCCCCACCACCAACTTTTTTGCACTGCAAAAAAACACGCTTTTGCACGCGGGCCCATACATAGTACAAACTCTACGTTTCGTAGACTATTTTACATAAATAGTCTACACCGTTGTATACGCTCCAAATACACTACCACACATTGAACCTTTTTGCAGTGCAAAAAAGTACGTGTCGGCAGTCACGTAGGCCGGCCTTATCGGGTCGCGTCCTGTCACGTACGAATCACATTATCGGACCGGACGAGTGTTGTCTTATCGTGACAGGACGCCAGCTTCCTGTGTTGCTAACCGCAGCCGGACGCAACTCCTTATCGGAACAGGACGCGCCTCCATATCAGCCGCGCGTTATCTCATGCGCGTGACCGGACACGAGGCGCCCGTCCCGCTTATCGCGCCTATAAATACAGCCCGCAACGATCTGGTAAACACAGTTGAACAGCATCTGTTCGAAACCGGTGCGATCGCATGGTGAGCAAGGGCGAGGAGCTGTTCACCGGGGTGGTGCCCATCCTGGTCGAGCTGGACGGCGACGTAAACGGCCACAAGTTCAGCGTGTCCGGCGAGGGCGAGGGCGATGCCACCTACGGCAAGCTGACCCTGAAGTTCATCTGCACCACCGGCAAGCTGCCCGTGCCCTGGCCCACCCTCGTGACCACCCTGACCTACGGCGTGCAGTGCTTCAGCCGCTACCCCGACCACATGAAGCAGCACGACTTCTTCAAGTCCGCCATGCCCGAAGGCTACGTCCAGGAGCGCACCATCTTCTTCAAGGACGACGGCAACTACAAGACCCGCGCCGAGGTGAAGTTCGAGGGCGACACCCTGGTGAACCGCATCGAGCTGAAGGGCATCGACTTCAAGGAGGACGGCAACATCCTGGGGCACAAGCTGGAGTACAACTACAACAGCCACAACGTCTATATCATGGCCGACAAGCAGAAGAACGGCATCAAGGTGAACTTCAAGATCCGCCACAACATCGAGGACGGCAGCGTGCAGCTCGCCGACCACTACCAGCAGAACACCCCCATCGGCGACGGCCCCGTGCTGCTGCCCGACAACCACTACCTGAGCACCCAGTCCGCCCTGAGCAAAGACCCCAACGAGAAGCGCGATCACATGGTCCTGCTGGAGTTCGTGACCGCCGCCGGGATCACTCTCGGCATGGACGAGCTGTACAAGTAAAGATCTGGTACCTAAAGCTTTACAACTAAACACGACTTGGAGTATTCCTTGTAGTGTTTAAGATTTTAAATCTTACTTAATGACTTCGAACGATTTTAACGATAACTTTCTCTTTGTTTAACTTTAATCAGCATACATAAAAAGCCCCGGTTTTGTATCGGGAAGAAAAAAAATGTAATTGTGTTGCCTAGATAATAAACGTATTATCAAAGTGTGTGGTTTTCCTTTACCAAAGACCCCTTTAAGATGGGCCTAATGGGCTTAAGTCGAGTCCTTTCCGATGTGTTAAATACACATTTATTACACTGATGCGTCGAATGTACACTTTTAATAGGATAGCTCCACTAAAAATTATTTTATTTATTTAATTTGTTGCACCAAAACTGATACATTGACGAAACGCGTATGGCGCGCCATTAATTAAATTATTGTTTTAAGTATGATAGTAAATCACATTACGCCGCGTTCGAATTAATAGTGGTCACTTTTTTCTTATCTCTTAAGCAAACCGTTTGAATAAATTACTCATATTTTTGTTGTTGTTGGAAATAGAGCAAAACTTTTTTTTTCGTCGTGAAGAGAATAAAATTCTCTTTGAGACGAAATGCATTGGTATGTGTTATCTTTAGTAGTATTGATAATATAGTGTGTTAAACATTGCGCACTGCAAAAAAAACATGCTGTTCGAATTAATAGTGGTTGGGGCTCGTAGAAAACGAAAAATATCTTAAGCTAGCATAGAGAATGGAGCAAAACTCAATTTGATGC

**>pB-CRISPR**

Red piggyBac arms

Gray IE2 prompter

Wathet blue zeocin coding sequence

Brown Ser1PA

Yellow *U6* promoter

Pink *Hr3 CQ* Enhancer

Bottle green *hsp70* promoter

Crimson *Sp*Cas9 coding sequence

Dark blue SV40PA

Green sgRNA Scaffolds

**NheI and AscI cutting site**

TCGCGCGTTTCGGTGATGACGGTGAAAACCTCTGACACATGCAGCTCCCGGAGACGGTCACAGCTTGTCTGTAAGCGGATGCCGGGAGCAGACAAGCCCGTCAGGGCGCGTCAGCGGGTGTTGGCGGGTGTCGGGGCTGGCTTAACTATGCGGCATCAGAGCAGATTGTACTGAGAGTGCACCATATGCGGTGTGAAATACCGCACAGATGCGTAAGGAGAAAATACCGCATCAGGCGCCATTCGCCATTCAGGCTGCGCAACTGTTGGGAAGGGCGATCGGTGCGGGCCTCTTCGCTATTACGCCAGCTGGCGAAAGGGGGATGTGCTGCAAGGCGATTAAGTTGGGTAACGCCAGGGTTTTCCCAGTCACGACGTTGTAAAACGACGGCCAGTGAATTGGAGATCGGTACTTCGCGAATGCGTCGAGATAAGAGGGTTAAAAAATATATTTTACGCACCATATACGCATCGGGTTGATATCGTTAATATGGATCAATTTGAACAGTTGATTAACGTGTCTCTGCTCAAGTCTTTGATCAAAACGCAAATCGACGAAAATGTGTCGGACAATATCAAGTCGATGAGCGAAAAACTAAAAAGGCTAGAATACGACAATCTCACAGACAGCGTTGAGATATACGGTATTCACGACAGCAGGCTGAATAATAAAAAAATTAGAAACTATTATTTAACCCTAGAAAGATAATCATATTGTGACGTACGTTAAAGATAATCATGCGTAAAATTGACGCATGTGTTTTATCGGTCTGTATATCGAGGTTTATTTATTAATTTGAATAGATATTAAGTTTTATTATATTTACACTTACATACTAATAATAAATTCAACAAACAATTTATTTATGTTTATTTATTTATTAAAAAAAAACAAAAACTCAAAATTTCTTCTATAAAGTAACAAAACTTTTAAACATTCTCTCTTTTACAAAAATAAACTTATTTTGTACTTTAAAAACAGTCATGTTGTATTATAAAATAAGTAATTAGCTTAACTTATACATAATAGAAACAAATTATACTTATTAGTCAGTCAGAAACAACTTTGGCACATATCAATATTATGCTCTCGACAAATAACTTTTTTGCATTTTTTGCACGATGCATTTGCCTTTCGCCTTATTTTAGAGGGGCAGTAAGTACAGTAAGTACGTTTTTTCATTACTGGCTCTTCAGTACTGTCATCTGATGTACCAGGCACTTCATTTGGCAAAATATTAGAGATATTATCGCGCAAATATCTCTTCAAAGTAGGAGCTTCTAAACGCTTACGCATAAACGATGACGTCAGGCTCATGTAAAGGTTTCTCATAAATTTTTTGCGACTTTGAACCTTTTCTCCCTTGCTACTGACATTATGGCTGTATATAATAAAAGAATTTATGCAGGCAATGTTTATCATTCCGTACAATAATGCCATAGGCCACCTATTCGTCCTCCTACTGCAGGTCATCACAGAACACATTTGGTCTAGCGTGTCCACTCCGCCTTTAGTTTGATTATAATACATAACCATTTGCGGTTTACCGGTACTTTCGTTGATAGAAGCATCCTCATCACAAGATGATAATAAGTATACCATCTTAGCTGGCTTCGGTTTATATGAGACGAGAGTAAGGGGTCCGTCAAAACAAAACATCGATGTTCCCACTGGCCTGGAGCGACTGTTTTTCAGTACTTCCGGTATCTCGCGTTTGTTCCTGCAGGATCATGATGATAAACAATGTATGGTGCTAATGTTGCTTCAACAACAATTCTGTTGAACTGTGTTTTCATGTTTGCCAACAAGCACCTTTATACTCGGTGGCCTCCCCACCACCAACTTTTTTGCACTGCAAAAAAACACGCTTTTGCACGCGGGCCCATACATAGTACAAACTCTACGTTTCGTAGACTATTTTACATAAATAGTCTACACCGTTGTATACGCTCCAAATACACTACCACACATTGAACCTTTTTGCAGTGCAAAAAAGTACGTGTCGGCAGTCACGTAGGCCGGCCTTATCGGGTCGCGTCCTGTCACGTACGAATCACATTATCGGACCGGACGAGTGTTGTCTTATCGTGACAGGACGCCAGCTTCCTGTGTTGCTAACCGCAGCCGGACGCAACTCCTTATCGGAACAGGACGCGCCTCCATATCAGCCGCGCGTTATCTCATGCGCGTGACCGGACACGAGGCGCCCGTCCCGCTTATCGCGCCTATAAATACAGCCCGCAACGATCTGGTAAACACAGTTGAACAGCATCTGTTCGAAATGGCCAAGTTGACCAGTGCCGTTCCGGTGCTCACCGCGCGCGACGTCGCCGGAGCGGTCGAGTTCTGGACCGACCGGCTCGGGTTCTCCCGGGACTTCGTGGAGGACGACTTCGCCGGTGTGGTCCGGGACGACGTGACCCTGTTCATCAGCGCGGTCCAGGACCAGGTGGTGCCGGACAACACCCTGGCCTGGGTGTGGGTGCGCGGCCTGGACGAGCTGTACGCCGAGTGGTCGGAGGTCGTGTCCACGAACTTCCGGGACGCCTCCGGGCCGGCCATGACCGAGATCGGCGAGCAGCCGTGGGGGCGGGAGTTCGCCCTGCGCGACCCGGCCGGCAACTGCGTGCACTTCGTGGCCGAGGAGCAGGACTAAAGCTTTACAACTAAACACGACTTGGAGTATTCCTTGTAGTGTTTAAGATTTTAAATCTTACTTAATGACTTCGAACGATTTTAACGATAACTTTCTCTTTGTTTAACTTTAATCAGCATACATAAAAAGCCCCGGTTTTGTATCGGGAAGAAAAAAAATGTAATTGTGTTGCCTAGATAATAAACGTATTATCAAAGTGTGTGGTTTTCCTTTACCAAAGACCCCTTTAAGATGGGCCTAATGGGCTTAAGTCGAGTCCTTTCCGATGTGTTAAATACACATTTATTACACTGATGCGTCGAATGTACACTTTTAATAGGATAGCTCCACTAAAAATTATTTTATTTATTTAATTTGTTGCACCAAAACTGATACATTGACGAAACGCGTAT**GCTAGC**AATGAAAGATCTTTATCGATTTAGCCAAAAGCAAAAGCTTGACCAAAAATAGGATAATATTTGTTTTTTTATTTAAAAAAATAAACAATTTTTTATACATAAACTGTTTATCTAGTATTAATATTTATGTTAACATTTGATAACGAATCAAATATATTTTTAAACTAATTAAAAAATCCGATGTATGTTATAAAATTGTTCTAGAAAAAAAGCACCGACTCGGTGCCACTTTTTCAAGTTGATAACGGACTAGCCTTATTTTAACTTGCTATTTCTAGCTCTAAAACACTGGCAGGTGTCTTGACGAGTTCTTCTGAATTATTAACGCTTACAATTTCCTGATGCGGTATTTTCTCCTTACGCATCTGTGCGGTATTTCACACCGCATCAGGTGGCACTTTTCGGGGAAATGTGCGCGGAACCCCTATTTGTTTATTTTTCTAAATACATTCAAATATGTATCCGCTCATGAGATTATCAAAAAGGATCTTCACCTAGATCCTTTTAAATTAAAAATGAAGTTTTAAATCAATCTAAAGTATATATGAGTAAACTTGGTCTGACAGTTACCAATGCCACCTGCCATCACTTGTAGAGCACGATATTTTGTATATATACCTAAAAAAACTAAACTATTGAAAGCGTGATTTACAACAACACTCGACTTTACAAAGATTATTCAAAAAGAGCAAAAACTCTTAACATATTCTATTAAAGATATATAATATAATTAAAACGAAATTAAATAATAACAATAAAACCTTTAGAATTTGTAATAAAATCCATAAAAACAAATGAAAACAGTTATGGTTTGTACAGCGCCATCTGTTATTACTTTGACAAAATCACTATGACTATCTGACCTTGTCTTACACGTTAACAATTCTTATTCTGTCCTTATCTATAAGCCAAGTACCAAGCTTAAATTCGTATGGCTTATAGTTGACGATTTTTAAATTCTCAAGGTATGTACTTATTTAATATTAATAAGTACTAATTGTTAAAATCATCTAAAACAATTCAGTGATTTACAACAATGTGTACTACATAACCTAATACTTATAAATTTATTAAACTGTATTGATTCTTTTAGGTCAATCATCATGACTTTAGGAGACTTGGTGTCTCAGGAAAAAGGAACGCAAAAAGATTGAGGCGTTTGAAATGTATTGCTGGAGAAAGCTGCTACGCATTCCTTGGACAGCTT**GGCGCGCC**CAGCGTCGTGAAAAGAGGCAATGACAAATACAAAACGACGTATGAGCAGACCCGTCGCCAAGACGGGTCTACCTCTAAGATGATGTCATTTGTTTTTTAAAACTAACTCGCTTTACGAGTAGAATTCTACGTGTAAAACATAATCAAGAGATGATGTCATTTGTTTTTCAAAACCAAACTCGCTTTACGAGTAGAATTCTACGTGTAAAACACAATCAAAAGATGATGTCATTCGTTTTTCAAAACCGAATTTAAGAAATGATGTCATTTGTTTTTCAAAACCAAACTCGCTTTACGAGCAGAATTCTACGTGTAAAACACAATCAAGAGATGATGTCATTTGTTTTTCAAAACTGAATGATGTCATTTGTTTTTCAAAACTAAACTTGCTTTGCGAGTAGAATTCTACGTGTAAAACACAGTCAAGAGATGATGTCATTTGTTTTTCAAAACTGAACCGGCTTTACGAGTAGAATTCTACTTGTAAAACATAATCAAGAGATGATGTCATTTGTTTTTCAAAACTGAACTGGCTTTACGAGTAGAATTCTACGTGTAAAACATAATCAAGAGATGATGTCATCATTAAACTGATGTCATTTTATACACGATTGTTAACATGTTTAATAATGACTAATTTGTTTTTCCAAATTAAACTCGCTTTACGAGTAGAATTCTACTTGTAACGCACGATTAAGTATGAATCATAAGCTGATGTCATTTGTTTTCGACATAAAATGTTTATACAATGGAATCTTCTTGTAAATTATCCAAATAATATAATTTATCCGATTCTACGTTACATTTAAATTCGTTGTTATCGTACAATTCTTCAGGACACGCCATGTATTGGTCATTTTTAGCGTGCAACCAACGATTGTATTTGACGCCGTCGTTGGATTGCGTGTTCAGGTTGGCGTACACGTGACTGGGCACGGCTTCTTTTTCCATGGGACGTCGACCGAGAAATTTCTCTGGCCGTTATTCGTTATTCTCTCTTTTCTTTTTGGGTCTCTCCCTCTCTGCACTAATGCTCTCTCACTCTGTCACACAGTAAACGGCATACTGCTCTCGTTGGTTCGAGAGAGCGCGCCTCGAATGTTCGCGAAAAGAGCGCCGGAGTATAAATAGAGGCGCTTCGTCTACGGAGCGACAATTCAATTCAAACAAGCAAAGTGAACACGTCGCTAAGCGAAAGCTAAGCAAATAAACAAGCGCAGCTGAACAAGCTAAACAATCTGCAGTAAAGTGCAAGTTAAAGTGAATCAATTAAAAGTAACCAGCAACCAAGTAAATCAACTGCAACTACTGAAATCTGCCAAGAAGTAATTATTGAATACAAGAAGAGAACTCTGGGGGATCTCTAGTCCAGTGTGGTGGAATTCGCCATGGCCCCAAAGAAAAAGAGAAAGGTTGATTACAAAGACCACGACGGAGACTACAAAGACCACGACATTGATTATAAAGATGATGATGATAAAGGAACGATGGACAAAAAGTATAGCATCGGTCTGGATATTGGAACTAACTCCGTCGGCTGGGCTGTAATCACCGACGAATACAAGGTCCCGTCAAAAAAGTTCAAGGTATTGGGTAACACAGATCGTCACTCTATCAAAAAGAATCTCATTGGAGCTCTGTTGTTCGACAGCGGCGAAACAGCTGAGGCCACTAGACTGAAGCGCACCGCCAGACGCCGTTACACGAGGAGAAAGAACAGAATCTGCTACTTGCAAGAAATATTCTCAAACGAGATGGCCAAAGTGGACGATTCGTTCTTTCATAGGTTAGAAGAGAGTTTCCTTGTTGAAGAGGATAAAAAGCACGAAAGACATCCGATATTTGGAAACATCGTGGACGAAGTTGCTTATCACGAGAAGTACCCCACGATCTATCATCTGCGTAAAAAGTTGGTGGACTCGACAGATAAGGCCGACCTCAGGTTAATATACCTTGCACTGGCGCACATGATCAAATTCAGAGGCCATTTTCTGATTGAAGGTGACCTGAACCCTGACAATAGTGATGTGGACAAACTCTTCATTCAATTAGTTCAGACCTACAATCAACTGTTTGAAGAGAACCCTATCAACGCTTCAGGAGTTGACGCTAAGGCCATCCTTAGTGCGAGACTGAGCAAATCCCGCCGTCTCGAAAACTTAATCGCACAGTTGCCTGGAGAGAAAAAGAACGGTTTGTTCGGAAATCTCATTGCGTTGTCACTCGGACTCACGCCAAACTTCAAGTCTAACTTCGATTTGGCAGAAGACGCGAAACTGCAACTGAGCAAAGACACATATGACGATGACCTCGATAACCTCTTAGCTCAGATCGGCGATCAATACGCCGACTTGTTCCTCGCTGCCAAAAATCTGTCGGACGCTATACTTCTGAGTGATATCTTGCGCGTCAACACAGAAATTACTAAGGCTCCTCTGTCGGCCAGTATGATAAAACGCTATGACGAACACCATCAGGATTTGACATTGCTCAAAGCCCTCGTGCGTCAACAGCTCCCAGAAAAGTACAAGGAGATTTTCTTTGATCAGTCCAAGAATGGCTACGCAGGTTATATAGACGGTGGAGCGTCGCAAGAAGAGTTCTACAAGTTCATCAAGCCAATATTAGAAAAGATGGACGGCACGGAAGAGTTACTTGTTAAGCTGAATCGTGAGGACCTGTTGCGTAAACAGAGGACATTCGATAACGGATCAATTCCGCACCAAATACATCTTGGCGAACTGCACGCTATCCTCAGGAGACAAGAGGACTTCTACCCCTTTTTAAAGGATAACCGTGAAAAGATCGAGAAAATCCTGACTTTCAGGATTCCTTACTATGTCGGCCCACTGGCTCGTGGTAATAGCAGGTTTGCCTGGATGACCAGGAAGTCCGAAGAGACAATTACTCCGTGGAACTTCGAAGAGGTGGTTGATAAAGGAGCATCAGCGCAGTCTTTCATAGAACGCATGACAAATTTTGACAAGAACTTACCGAATGAGAAGGTCCTTCCCAAACACTCACTCCTCTACGAATACTTCACAGTATACAACGAGCTCACTAAAGTCAAGTACGTAACCGAGGGTATGCGCAAACCCGCTTTCCTGTCTGGAGAGCAGAAAAAGGCCATCGTGGACCTTCTGTTCAAGACAAACCGTAAGGTCACTGTAAAGCAACTCAAGGAAGACTACTTCAAAAAGATAGAGTGTTTCGATTCAGTGGAAATCTCTGGCGTTGAGGACAGATTTAACGCTTCCTTGGGTACTTACCACGATTTGCTCAAGATCATTAAAGATAAGGACTTCCTCGACAACGAAGAGAACGAAGATATCTTAGAGGACATAGTTCTCACCCTTACGCTGTTTGAAGATAGAGAGATGATTGAAGAGCGCCTGAAGACTTATGCTCATTTGTTCGATGACAAAGTCATGAAGCAACTGAAACGCCGTAGGTACACCGGCTGGGGTAGATTATCGCGCAAACTTATTAATGGTATAAGGGACAAGCAGTCGGGAAAAACGATATTGGACTTTCTCAAGAGTGATGGTTTCGCCAACAGAAATTTTATGCAACTCATACACGATGACAGCTTAACATTCAAGGAAGATATCCAAAAAGCACAGGTGTCGGGACAGGGCGACAGTTTGCACGAACATATTGCTAACCTCGCCGGCTCCCCGGCGATAAAAAAGGGTATCCTTCAGACTGTGAAAGTCGTAGATGAACTGGTGAAGGTTATGGGTCGTCATAAACCCGAGAACATAGTTATCGAAATGGCTAGGGAGAATCAAACAACTCAGAAGGGACAGAAAAACTCAAGAGAACGCATGAAGCGCATTGAAGAGGGTATCAAAGAGCTTGGCAGTCAAATCCTGAAGGAACACCCTGTCGAGAACACGCAACTTCAGAACGAAAAATTGTACCTCTACTATCTGCAGAATGGTAGAGATATGTACGTAGACCAAGAATTGGATATTAACCGCCTCTCAGATTACGACGTGGATCATATAGTTCCGCAGTCATTCTTGAAGGATGACTCTATCGACAACAAAGTCCTCACAAGATCAGACAAGAACCGCGGAAAATCAGATAATGTACCCTCTGAAGAGGTGGTTAAAAAGATGAAAAACTACTGGAGACAGTTACTTAACGCTAAGTTGATCACGCAAAGAAAGTTCGATAACCTCACAAAGGCTGAACGCGGCGGTTTAAGCGAGCTTGACAAGGCCGGTTTCATAAAACGTCAGTTAGTCGAAACCAGGCAAATTACGAAACACGTAGCCCAAATATTGGATTCCCGCATGAACACTAAATACGATGAAAATGACAAGCTCATCCGTGAGGTCAAAGTAATTACCCTGAAAAGCAAGTTGGTGTCCGACTTCAGAAAGGATTTCCAGTTCTACAAAGTTCGCGAAATCAACAACTACCACCATGCACATGACGCTTACCTGAACGCAGTCGTAGGCACTGCGTTAATTAAAAAGTACCCTAAACTGGAATCTGAGTTCGTGTACGGTGACTATAAAGTGTACGATGTTAGAAAGATGATCGCTAAAAGCGAACAGGAGATTGGAAAGGCTACCGCCAAGTATTTCTTTTACTCCAACATCATGAATTTCTTTAAGACCGAAATCACGTTAGCAAATGGCGAGATACGTAAAAGGCCACTTATCGAAACAAACGGAGAAACTGGCGAGATAGTGTGGGACAAGGGTAGAGATTTTGCCACTGTCCGCAAAGTACTGTCGATGCCGCAAGTGAATATCGTTAAAAAGACCGAAGTTCAAACGGGAGGCTTCAGCAAAGAGTCCATCCTGCCCAAGCGTAACAGTGATAAATTGATAGCTAGGAAAAAGGACTGGGATCCTAAAAAGTATGGTGGATTCGACAGCCCAACTGTCGCATACTCCGTATTGGTGGTTGCGAAAGTCGAAAAAGGAAAGAGCAAAAAGCTCAAGTCCGTAAAAGAGCTGTTGGGCATTACCATAATGGAAAGATCATCTTTCGAGAAGAATCCTATCGATTTTCTGGAAGCCAAGGGATATAAAGAGGTCAAAAAGGACCTCATAATCAAGTTACCAAAATACAGTCTGTTCGAATTGGAGAACGGCAGAAAACGCATGCTTGCATCAGCGGGTGAACTGCAAAAGGGAAATGAGTTAGCACTTCCTTCTAAATACGTCAACTTCCTGTATTTGGCGTCACACTACGAAAAACTGAAGGGCTCTCCAGAAGATAACGAGCAAAAGCAGTTATTTGTGGAACAGCACAAACATTACCTTGACGAAATTATAGAGCAAATCTCGGAGTTCAGTAAGAGAGTGATTTTGGCTGACGCCAATCTTGATAAAGTTCTGTCTGCTTACAACAAGCACCGTGATAAACCGATTAGGGAACAGGCCGAGAACATCATACATCTCTTCACACTCACTAACCTTGGTGCACCCGCAGCGTTCAAATATTTTGACACCACGATAGATCGTAAGAGGTACACCAGCACGAAAGAAGTTTTGGACGCGACACTCATCCATCAATCAATCACGGGCCTGTACGAGACCAGAATCGACCTGTCCCAGCTCGGTGGCGACTAGCGGCCGCGACTCTAGATCATAATCAGCCATGCGGCCGCGACTCTAGACCACATTTGTAGAGGTTTTACTTGCTTTAAAAAACCTCCCACACCTCCCCCTGAACCTGAAACATAAAATGAATGCAATTGTTGTTGTTAACTTGTTTATTGCAGCTTATAATGGTTACAAATAAAGCAATAGCATCACAAATTTCACAAATAAAGCATTTTTTTCACTGCATTCTAGTTGTGGTTTGTCCAAACTCATCAATGTATCTTAAAGCTTATCGATACGCGTACCTAGGCCGGCCGATCTCGGATCTGACAATGTTCAGTGCAGAGACTCGGCTACGCCTCGTGGACTTTGAAGTTGACCAACAATGTTTATTCTTACCTCTAATAGTCCTCTGTGGCAAGGTCAAGATTCTGTTAGAAGCCAATGAAGAACCTGGTTGTTCAATAACATTTTGTTCGTCTAATATTTCACTACCGCTTGACGTTGGCTGCACTTCATGTACCTCATCTATAAACGCTTCTTCTGTATCGCTCTGGACGTCATCTTCACTTACGTGATCTGATATTTCACTGTCAGAATCCTCACCAACAAGCTCGTCATCGCTTTGCAGAAGAGCAGAGAGGATATGCTCATCGTCTAAAGAACTACCCATTTTATTATATATTAGTCACGATATCTATAACAAGAAAATATATATATAATAAGTTATCACGTAAGTAGAACATGAAATAACAATATAATTATCGTATGAGTTAAATCTTAAAAGTCACGTAAAAGATAATCATGCGTCATTTTGACTCACGCGGTCGTTATAGTTCAAAATCAGTGACACTTACCGCATTGACAAGCACGCCTCACGGGAGCTCCAAGCGGCGACTGAGATGTCCTAAATGCACAGCGACGGATTCGCGCTATTTAGAAAGAGAGAGCAATATTTCAAGAATGCATGCGTCAATTTTACGCAGACTATCTTTCTAGGGTTAAAAAAGATTTGCGCTTTACTCGACCTAAACTTTAAACACGTCATAGAATCTTCGTTTGACAAAAACCACATTGTGGCCAAGCTGTGTGACGCGACGCGCGCTAAAGAATGGCAAACCAAGTCGCGCGAGCGTCGACTCTAGAGGATCCCCGGGTACCGAGCTCGAATTCGTAATCATGGTCATAGCTGTTTCCTGTGTGAAATTGTTATCCGCTCACAATTCCACACAACATACGAGCCGGAAGCATAAAGTGTAAAGCCTGGGGTGCCTAATGAGTGAGCTAACTCACATCGGATGCCGGGACCGACGAGTGCAGAGGCGTGCAAGCGAGCTTGGCGTAATCATGGTCATAGCTGTTTCCTGTGTGAAATTGTTATCCGCTCACAATTCCACACAACATACGAGCCGGAAGCATAAAGTGTAAAGCCTGGGGTGCCTAATGAGTGAGCTAACTCACATTAATTGCGTTGCGCTCACTGCCCGCTTTCCAGTCGGGAAACCTGTCGTGCCAGCTGCATTAATGAATCGGCCAACGCGCGGGGAGAGGCGGTTTGCGTATTGGGCGCTCTTCCGCTTCCTCGCTCACTGACTCGCTGCGCTCGGTCGTTCGGCTGCGGCGAGCGGTATCAGCTCACTCAAAGGCGGTAATACGGTTATCCACAGAATCAGGGGATAACGCAGGAAAGAACATGTGAGCAAAAGGCCAGCAAAAGGCCAGGAACCGTAAAAAGGCCGCGTTGCTGGCGTTTTTCCATAGGCTCCGCCCCCCTGACGAGCATCACAAAAATCGACGCTCAAGTCAGAGGTGGCGAAACCCGACAGGACTATAAAGATACCAGGCGTTTCCCCCTGGAAGCTCCCTCGTGCGCTCTCCTGTTCCGACCCTGCCGCTTACCGGATACCTGTCCGCCTTTCTCCCTTCGGGAAGCGTGGCGCTTTCTCATAGCTCACGCTGTAGGTATCTCAGTTCGGTGTAGGTCGTTCGCTCCAAGCTGGGCTGTGTGCACGAACCCCCCGTTCAGCCCGACCGCTGCGCCTTATCCGGTAACTATCGTCTTGAGTCCAACCCGGTAAGACACGACTTATCGCCACTGGCAGCAGCCACTGGTAACAGGATTAGCAGAGCGAGGTATGTAGGCGGTGCTACAGAGTTCTTGAAGTGGTGGCCTAACTACGGCTACACTAGAAGAACAGTATTTGGTATCTGCGCTCTGCTGAAGCCAGTTACCTTCGGAAAAAGAGTTGGTAGCTCTTGATCCGGCAAACAAACCACCGCTGGTAGCGGTGGTTTTTTTGTTTGCAAGCAGCAGATTACGCGCAGAAAAAAAGGATCTCAAGAAGATCCTTTGATCTTTTCTACGGGGTCTGACGCTCAGTGGAACGAAAACTCACGTTAAGGGATTTTGGTCATGAGATTATCAAAAAGGATCTTCACCTAGATCCTTTTAAATTAAAAATGAAGTTTTAAATCAATCTAAAGTATATATGAGTAAACTTGGTCTGACAGTTACCAATGCTTAATCAGTGAGGCACCTATCTCAGCGATCTGTCTATTTCGTTCATCCATAGTTGCCTGACTCCCCGTCGTGTAGATAACTACGATACGGGAGGGCTTACCATCTGGCCCCAGTGCTGCAATGATACCGCGAGACCCACGCTCACCGGCTCCAGATTTATCAGCAATAAACCAGCCAGCCGGAAGGGCCGAGCGCAGAAGTGGTCCTGCAACTTTATCCGCCTCCATCCAGTCTATTAATTGTTGCCGGGAAGCTAGAGTAAGTAGTTCGCCAGTTAATAGTTTGCGCAACGTTGTTGCCATTGCTACAGGCATCGTGGTGTCACGCTCGTCGTTTGGTATGGCTTCATTCAGCTCCGGTTCCCAACGATCAAGGCGAGTTACATGATCCCCCATGTTGTGCAAAAAAGCGGTTAGCTCCTTCGGTCCTCCGATCGTTGTCAGAAGTAAGTTGGCCGCAGTGTTATCACTCATGGTTATGGCAGCACTGCATAATTCTCTTACTGTCATGCCATCCGTAAGATGCTTTTCTGTGACTGGTGAGTACTCAACCAAGTCATTCTGAGAATAGTGTATGCGGCGACCGAGTTGCTCTTGCCCGGCGTCAATACGGGATAATACCGCGCCACATAGCAGAACTTTAAAAGTGCTCATCATTGGAAAACGTTCTTCGGGGCGAAAACTCTCAAGGATCTTACCGCTGTTGAGATCCAGTTCGATGTAACCCACTCGTGCACCCAACTGATCTTCAGCATCTTTTACTTTCACCAGCGTTTCTGGGTGAGCAAAAACAGGAAGGCAAAATGCCGCAAAAAAGGGAATAAGGGCGACACGGAAATGTTGAATACTCATACTCTTCCTTTTTCAATATTATTGAAGCATTTATCAGGGTTATTGTCTCATGAGCGGATACATATTTGAATGTATTTAGAAAAATAAACAAATAGGGGTTCCGCGCACATTTCCCCGAAAAGTGCCACCTGACGTCTAAGAAACCATTATTATCATGACATTAACCTATAAAAATAGGCGTATCACGAGGCCCTTTCGTC

**References**

Ai C, Kong L. 2018. CGPS: A machine learning-based approach integrating multiple gene set analysis tools for better prioritization of biologically relevant pathways. *J Genet Genomics* **45:** 489-504.

Amsterdam A, Nissen RM, Sun ZX, Swindell EC, Farrington S, Hopkins N. 2004. Identification of 315 genes essential for early zebrafish development. *P Natl Acad Sci USA* **101:** 12792-12797.

Bishop AH, Rachwal PA, Vaid A. 2014. Identification of Genes Required by *Bacillus thuringiensis* for Survival in Soil by Transposon-Directed Insertion Site Sequencing. *Curr Microbiol* **68:** 477-485.

Giaever G, Chu AM, Ni L, Connelly C, Riles L, Veronneau S, Dow S, Lucau-Danila A, Anderson K, Andre B et al. 2002. Functional profiling of the *Saccharomyces cerevisiae* genome. *Nature* **418:** 387-391.

Goldberg T, Hecht M, Hamp T, Karl T, Yachdav G, Ahmed N, Altermann U, Angerer P, Ansorge S, Balasz K et al. 2014. LocTree3 prediction of localization. *Nucleic Acids Res* **42:** W350-W355.

Hua XT, Li BB, Song L, Hu CM, Li XY, Wang DD, Xiong Y, Zhao P, He HW, Xia QY et al. 2018. Stimulator of interferon genes (STING) provides insect antiviral immunity by promoting Dredd caspase-mediated NF-kappa B activation. *J Biol Chem* **293:** 11878-11890.

Kamath RS, Fraser AG, Dong Y, Poulin G, Durbin R, Gotta M, Kanapin A, Le Bot N, Moreno S, Sohrmann M et al. 2003. Systematic functional analysis of the *Caenorhabditis elegans* genome using RNAi. *Nature* **421:** 231-237.

Lek M, Karczewski KJ, Minikel EV, Samocha KE, Banks E, Fennell T, O'Donnell-Luria AH, Ware JS, Hill AJ, Cummings BB et al. 2016. Analysis of protein-coding genetic variation in 60,706 humans. *Nature* **536:** (7616), 285-91.

Liao BY, Zhang JZ. 2007. Mouse duplicate genes are as essential as singletons. *Trends Genet* **23:** 378-381.

Ma SY, Chang JS, Wang XG, Liu YY, Zhang JD, Lu W, Gao J, Shi R, Zhao P, Xia QY. 2014. CRISPR/Cas9 mediated multiplex genome editing and heritable mutagenesis of BmKu70 in *Bombyx mori*. *Sci Rep-Uk* **4:** 4489.

Meinke D, Muralla R, Sweeney C, Dickerman A. 2008. Identifying essential genes in *Arabidopsis thaliana*. *Trends Plant Sci* **13:** 483-491.

Metaxakis A, Oehler S, Klinakis A, Savakis C. 2005. Minos as a genetic and genomic tool in *Drosophila melanogaster*. *Genetics* **171:** 571-581.

Spradling AC, Stern D, Beaton A, Rhem EJ, Laverty T, Mozden N, Misra S, Rubin GM. 1999. The Berkeley *Drosophila* Genome Project gene disruption project: Single *P*-element insertions mutating 25% of vital *drosophila* genes. *Genetics* **153:** 135-177.

Trapnell C, Roberts A, Goff L, Pertea G, Kim D, Kelley DR, Pimentel H, Salzberg SL, Rinn JL, Pachter L. 2012. Differential gene and transcript expression analysis of RNA-seq experiments with TopHat and Cufflinks. *Nat Protoc* **7:** 562-578.

Xie C, Mao XZ, Huang JJ, Ding Y, Wu JM, Dong S, Kong L, Gao G, Li CY, Wei LP. 2011. KOBAS 2.0: a web server for annotation and identification of enriched pathways and diseases. *Nucleic Acids Res* **39:** W316-W322.

Zhang Q, Cheng TC, Jin SK, Guo YB, Wu YQ, Liu DL, Xu XM, Sun YT, Li ZQ, He HW et al. 2017. Genome-wide open chromatin regions and their effects on the regulation of silk protein genes in Bombyx mori. *Sci Rep-Uk* **7:** (1), 12919.

Zhang R, Lin Y. 2009. DEG 5.0, a database of essential genes in both prokaryotes and eukaryotes. *Nucleic Acids Res* **37:** D455-D458.
