# Supplementary material for: Genome-wide CRISPR screening reveals genes essential for cell viability and resistance to abiotic and biotic stresses in Bombyx mori
Source: HighWire-hosted journal article supplement (doi:10.1101/gr.249045.119), 2020-05-01
Supplement: Supplemental_Table_S1.xlsx.xlsx [file Supplemental_Table_S1.xlsx.xlsx]

## Sheet: Supplemental Table legend
Supplemental_Table_S1. Promers used in this article
Sheet1	Supplemental Table legend
Sheet2	sgRNAs for knockout the EGFP
Sheet3	primers for PCR of EGFP
Sheet4	primers for constructe library
Sheet5	primers for NGS
Sheet6	primers for viral DNA detection
Sheet7	primers for knockout cell lines

## Sheet: sgRNAs for knockout the EGFP
sgRNA name	Target site with PAM
>EGFP-1	GGGCGAGGAGCTGTTCACCGGGG
>EGFP-2	GAGCTGGACGGCGACGTAAACGG
>EGFP-3	GGCCACAAGTTCAGCGTGTCCGG
>NS-1	CGCTTCAAGGTGCACATGGAGGG
>NS-2	GCGGAAGAACGCCTGCGGCTCGG

## Sheet: primers for PCR of EGFP
primer name	primer sequence
>EGFP-F	5-ATGGTGAGCAAGGGCG
>EGFP-R	5-TTACTTGTACAGCTCGTCCATG

## Sheet: primers for constructe library
primer name	primer sequence
>KU-1R	5-TCGATGATGATGATCAATTGTGGCGCGCCAAGCTGTCCAAGGAATGCGT
>DG-1R	5-TTGTAGAGCACGATATTTTGTATAT
>DP-2F	5-TCAATAGTTTAGTTTTTTTAGGTATATATACAAAATATCGTGCTCTACAA
>DP-2R	5-AAGTTGATAACGGACTAGCCTTATTTTAACTTGCTATTTCTAGCTCTAA
>DG-3F	5-TTAGAGCTAGAAATAGCAAGTTAAA
>KU-1F	5-ACCGATCGATCCTAGGCGCTAGCTAATGAAAGATCTTTATCGATTTAGC
>K-SerP1-F1	5-CGAGTCCTTTCCGATGTGT
>K-hr3-R1	5-CGTTTTGTATTTGTCATTGCC

## Sheet: primers for NGS
primer name	primer sequence
>gD-1F	5-CATGAGACTGTATAAATCACGCTTTCAATA
>gD-1R	5-GGTCATCACGATCGACTCGGTGCCACTTT
>gD-3F	5-GGTTTGCACATGTAAATCACGCTTTCAATA
>gD-3R	5-TGGGTTAACACACGACTCGGTGCCACTTT
>gD-4F	5-TAGGTTGCTTGGTAAATCACGCTTTCAATA
>gD-4R	5-CAGGAACCAGGACGACTCGGTGCCACTTT
>gD-6F	5-TACTCCAGGCTGTAAATCACGCTTTCAATA
>gD-6R	5-TTCGGCATAGTGCGACTCGGTGCCACTTT

## Sheet: primers for viral DNA detection
primer name	primer sequence
>GAPDH-F	5-CATTCCGCGTCCCTGTTGCTAAT
>GAPDH-R	5-GCTGCCTCCTTGACCTTTTGC
>GP64-F	5-CCATCGTGGAGACGGACTA
>GP64-R	5-CTCGCACTGCTGCCTGA

## Sheet: primers for knockout cell lines
primer name	primer name	primer sequence
>BMgn008956	5-AATATCGTGCTCTACAAGTGGCTTTGTATGATGTTAGAAGGTTTTAGAGCTAGAAATAG
>BMgn013496	5-AATATCGTGCTCTACAAGTGTTCCTGTTCTGTCTTACCTTGTTTTAGAGCTAGAAATAG
>BMgn009047	5-AATATCGTGCTCTACAAGTGCCGACGTTTCCTTCCGAGCAGTTTTAGAGCTAGAAATAG
>BMgn009713	5-AATATCGTGCTCTACAAGTGAGCCGAACACGTATTTACAAGTTTTAGAGCTAGAAATAG
>BMgn012529	5-AATATCGTGCTCTACAAGTGGTGAATCACAGGATGTCTGGGTTTTAGAGCTAGAAATAG
>BMgn016571	5-AATATCGTGCTCTACAAGTGACTAACGGAGAAATTTCTGGGTTTTAGAGCTAGAAATAG
>BMgn001509	5-AATATCGTGCTCTACAAGTGTCGTGAGTAAGAACTGATGCGTTTTAGAGCTAGAAATAG
>BMgn016733	5-AATATCGTGCTCTACAAGTGATTTTCACAAAAGCAGGCAAGTTTTAGAGCTAGAAATAG
>BMgn000432	5-AATATCGTGCTCTACAAGTGTGACAGGTTTTGATTCTGGTGTTTTAGAGCTAGAAATAG
>BMgn014403	5-AATATCGTGCTCTACAAGTGACGATAAGAAAAGTCGAGCAGTTTTAGAGCTAGAAATAG
>BMgn016795	5-AATATCGTGCTCTACAAGTGGATCTCCGTCATCTTCTGCGGTTTTAGAGCTAGAAATAG
