# Supplementary material for: Genome-wide CRISPR screening reveals genes essential for cell viability and resistance to abiotic and biotic stresses in Bombyx mori
Source: HighWire-hosted journal article supplement (doi:10.1101/gr.249045.119), 2020-05-01
Supplement: Supplemental_Table_S2.xlsx.xlsx [file Supplemental_Table_S2.xlsx.xlsx]

## Sheet: Supplemental_Table_S2
Supplemental_Table_S2. List for sgRNA library in this article
sgRNA_id	gene_id	sequence_other_annotation	target_strand	target_threshold_rejection_score	target_nonstandard_basecode_matches	target_location	target_sequence	sgRNA_position
BM_BM_gRNA_1	BMgn000001|Gene016488.0	Bm_scaf460 5 0 11153 11326 + 1488 11133 11346	-	5	0	FASTA:26-48	CTAGAGCGAACCAAACAACCCGG	28
BM_gRNA_2	BMgn000001|Gene016488.1	Bm_scaf460 5 174 12000 12139 + 1488 11980 12159	-	5	0	FASTA:21-43	AATGGCACCAACCAGCAATTTGG	23
BM_gRNA_3	BMgn000001|Gene016488.2	Bm_scaf460 5 314 12219 12896 + 1488 12199 12916 Warning:CutE13113	-	6	0	FASTA:62-84	AGATGTAGCACCACTTTCGGCGG	64
BM_gRNA_4	BMgn000001|Gene016488.0	Bm_scaf460 5 0 11153 11326 + 1488 11133 11346	-	5	0	FASTA:62-84	ACCATTGGAACAGTGCGGGTAGG	64
BM_gRNA_5	BMgn000001|Gene016488.1	Bm_scaf460 5 174 12000 12139 + 1488 11980 12159	+	5	0	FASTA:47-69	CTTAATGCTGGTGCTGAGTATGG	66
BM_gRNA_6	BMgn000002|Gene015146.1	Bm_scaf98 22 45 1234062 1234152 - 3375 1234042 1234172	+	4	0	FASTA:41-63	GATAAAGTCGAGGTCACAGCAGG	60
BM_gRNA_7	BMgn000002|Gene015146.2	Bm_scaf98 22 136 1233589 1233660 - 3375 1233569 1233680	-	8	0	FASTA:33-55	CTCCACGTAGAGGGGCTCAAGGG	35
BM_gRNA_8	BMgn000002|Gene015146.2	Bm_scaf98 22 136 1233589 1233660 - 3375 1233569 1233680	+	5	0	FASTA:55-77	GGAGAAGAAGCTTGGAACACCGG	74
BM_gRNA_9	BMgn000002|Gene015146.3	Bm_scaf98 22 208 1233256 1233425 - 3375 1233236 1233445	-	6	0	FASTA:120-142	GTAGCTGTCGAGGGCCAGCTTGG	122
BM_gRNA_10	BMgn000002|Gene015146.3	Bm_scaf98 22 208 1233256 1233425 - 3375 1233236 1233445	-	6	0	FASTA:154-176	CGTTGTAGCGCTTGCAGTGCTGG	156
BM_gRNA_11	BMgn000003|Gene015145.0	Bm_scaf98 2 0 1215619 1215720 - 210 1215599 1215740	+	6	0	FASTA:43-65	TGGCGCTAGTGGAAGAAGACGGG	62
BM_gRNA_12	BMgn000003|Gene015145.1	Bm_scaf98 2 102 1213510 1213547 - 210 1213490 1213567 Warning:CutS1213440	-	5	0	FASTA:33-55	GAGCTCTCGTACTCCGCCTGCGG	35
BM_gRNA_13	BMgn000003|Gene015145.0	Bm_scaf98 2 0 1215619 1215720 - 210 1215599 1215740	-	6	0	FASTA:69-91	GACAGGAAGTACACGAACAGCGG	71
BM_gRNA_14	BMgn000003|Gene015145.1	Bm_scaf98 2 102 1213510 1213547 - 210 1213490 1213567 Warning:CutS1213440	-	5	0	FASTA:55-77	ATCTTCGGGCAGCACATCGGTGG	57
BM_gRNA_15	BMgn000003|Gene015145.0	Bm_scaf98 2 0 1215619 1215720 - 210 1215599 1215740	-	4	0	FASTA:86-108	ACATGTACTGCAGCCACGACAGG	88
BM_gRNA_16	BMgn000004|Gene015140.0	Bm_scaf98 6 0 1054797 1055009 - 936 1054777 1055029	+	6	0	FASTA:38-60	GACAGCTTTGGGGATCAAGATGG	57
BM_gRNA_17	BMgn000004|Gene015140.1	Bm_scaf98 6 213 1053656 1053719 - 936 1053636 1053739	+	4	0	FASTA:44-66	TTTCTTGCAAGAACACGACGCGG	63
BM_gRNA_18	BMgn000004|Gene015140.2	Bm_scaf98 6 277 1052049 1052211 - 936 1052029 1052231	+	6	0	FASTA:145-167	GGGCTCGCACCCAGACGTTCAGG	164
BM_gRNA_19	BMgn000004|Gene015140.0	Bm_scaf98 6 0 1054797 1055009 - 936 1054777 1055029	-	4	0	FASTA:80-102	GAAGAGCCTGCTCGTACTGCTGG	82
BM_gRNA_20	BMgn000004|Gene015140.2	Bm_scaf98 6 277 1052049 1052211 - 936 1052029 1052231	-	5	0	FASTA:28-50	ACGCTCCGCCGCACGTCTCTAGG	30
BM_gRNA_21	BMgn000005|Gene015138.3	Bm_scaf98 11 332 1008460 1008570 - 1639 1008440 1008590	+	5	0	FASTA:81-103	TCTATGGCTTCTCGAGGCCTTGG	100
BM_gRNA_22	BMgn000005|Gene015138.3	Bm_scaf98 11 332 1008460 1008570 - 1639 1008440 1008590	+	4	0	FASTA:92-114	TCGAGGCCTTGGTTGGGTGACGG	111
BM_gRNA_23	BMgn000005|Gene015138.3	Bm_scaf98 11 332 1008460 1008570 - 1639 1008440 1008590	+	4	0	FASTA:86-108	GGCTTCTCGAGGCCTTGGTTGGG	105
BM_gRNA_24	BMgn000005|Gene015138.3	Bm_scaf98 11 332 1008460 1008570 - 1639 1008440 1008590	+	4	0	FASTA:85-107	TGGCTTCTCGAGGCCTTGGTTGG	104
BM_gRNA_25	BMgn000005|Gene015138.5	Bm_scaf98 11 629 1007265 1007464 - 1639 1007245 1007484	+	5	0	FASTA:138-160	ATTCCGACATCGTCTTCAACAGG	157
BM_gRNA_26	BMgn000006|Gene015137.0	Bm_scaf98 3 0 995601 996163 - 1012 995581 996183	-	6	0	FASTA:198-220	TCACGCATTCCACCGAATACTGG	200
BM_gRNA_27	BMgn000006|Gene015137.1	Bm_scaf98 3 563 995420 995530 - 1012 995400 995550 Warning:CutS995384	-	5	0	FASTA:50-72	AATTTGAGACCCAGCAGGAAAGG	52
BM_gRNA_28	BMgn000006|Gene015137.0	Bm_scaf98 3 0 995601 996163 - 1012 995581 996183	-	6	0	FASTA:329-351	ATCCTTGGCCAGTCTAGGGTCGG	331
BM_gRNA_29	BMgn000006|Gene015137.1	Bm_scaf98 3 563 995420 995530 - 1012 995400 995550 Warning:CutS995384	-	5	0	FASTA:92-114	GCGATGAGGGCTAGCGCCAAGGG	94
BM_gRNA_30	BMgn000006|Gene015137.0	Bm_scaf98 3 0 995601 996163 - 1012 995581 996183	-	6	0	FASTA:457-479	AAGTCAGTCAAGAGAGACCTTGG	459
BM_gRNA_31	BMgn000007|Gene015130.0	Bm_scaf98 1 0 896262 896447 - 279 896242 896467 Warning:CutS896169	-	5	0	FASTA:79-101	CATCTTTCTTCTCATTGGACGGG	81
BM_gRNA_32	BMgn000007|Gene015130.0	Bm_scaf98 1 0 896262 896447 - 279 896242 896467 Warning:CutS896169	-	5	0	FASTA:147-169	CCCTTCGTTATGTAATCGGTAGG	149
BM_gRNA_33	BMgn000007|Gene015130.0	Bm_scaf98 1 0 896262 896447 - 279 896242 896467 Warning:CutS896169	-	4	0	FASTA:48-70	AACACCGACTTCTTCTTCTTCGG	50
BM_gRNA_34	BMgn000007|Gene015130.0	Bm_scaf98 1 0 896262 896447 - 279 896242 896467 Warning:CutS896169	+	4	0	FASTA:97-119	AGATGGTCTTGAAACACCGAAGG	116
BM_gRNA_35	BMgn000007|Gene015130.0	Bm_scaf98 1 0 896262 896447 - 279 896242 896467 Warning:CutS896169	+	4	0	FASTA:165-187	AAGGGTGTTAGAAAAATGATAGG	184
BM_gRNA_36	BMgn000008|Gene015125.0	Bm_scaf98 1 0 853667 854174 - 762 853647 854194 Warning:CutS853413	-	7	0	FASTA:372-394	ACGTCTTCCCCAAAGGTCTGAGG	374
BM_gRNA_37	BMgn000008|Gene015125.0	Bm_scaf98 1 0 853667 854174 - 762 853647 854194 Warning:CutS853413	-	6	0	FASTA:41-63	CGGCTGCTACGGCGAGGCAGAGG	43
BM_gRNA_38	BMgn000008|Gene015125.0	Bm_scaf98 1 0 853667 854174 - 762 853647 854194 Warning:CutS853413	+	6	0	FASTA:449-471	TATCGCTGGTCTTGCGATCAAGG	468
BM_gRNA_39	BMgn000008|Gene015125.0	Bm_scaf98 1 0 853667 854174 - 762 853647 854194 Warning:CutS853413	-	5	0	FASTA:77-99	CTAGGATCTTGAAGCTGGTGAGG	79
BM_gRNA_40	BMgn000008|Gene015125.0	Bm_scaf98 1 0 853667 854174 - 762 853647 854194 Warning:CutS853413	-	5	0	FASTA:128-150	AAGTGAGGATATCCTTTGAAGGG	130
BM_gRNA_41	BMgn000009|Gene015122.0	Bm_scaf98 3 0 830636 831044 - 1854 830616 831064	-	6	0	FASTA:89-111	AGTTCTGGCTGTGACGGCAACGG	91
BM_gRNA_42	BMgn000009|Gene015122.1	Bm_scaf98 3 409 823247 823533 - 1854 823227 823553	-	7	0	FASTA:100-122	TCCTATGACGAGGATCGGGATGG	102
BM_gRNA_43	BMgn000009|Gene015122.0	Bm_scaf98 3 0 830636 831044 - 1854 830616 831064	+	6	0	FASTA:246-268	ATCGAAGGTGGCTAATACTGAGG	265
BM_gRNA_44	BMgn000009|Gene015122.1	Bm_scaf98 3 409 823247 823533 - 1854 823227 823553	-	7	0	FASTA:184-206	GGCTAACACCAAGGCCAGTTTGG	186
BM_gRNA_45	BMgn000009|Gene015122.0	Bm_scaf98 3 0 830636 831044 - 1854 830616 831064	-	6	0	FASTA:280-302	TTCGTTATGGTTACTCCACCAGG	282
BM_gRNA_46	BMgn000010|Gene015120.0	Bm_scaf98 3 0 815951 816138 - 1363 815931 816158	-	6	0	FASTA:136-158	GGACGCTTCCCAGGATGTTCGGG	138
BM_gRNA_47	BMgn000010|Gene015120.1	Bm_scaf98 3 188 815618 815873 - 1363 815598 815893	+	6	0	FASTA:107-129	ACCCAGGTCTGCCAGGGCCTTGG	126
BM_gRNA_48	BMgn000010|Gene015120.2	Bm_scaf98 3 444 810142 810605 - 1363 810122 810625 Warning:CutS809687	-	6	0	FASTA:52-74	TGGCGATGGCCAAGAGAGGGAGG	54
BM_gRNA_49	BMgn000010|Gene015120.0	Bm_scaf98 3 0 815951 816138 - 1363 815931 816158	+	5	0	FASTA:79-101	CGTTTTAATGGTGATCGGCGTGG	98
BM_gRNA_50	BMgn000010|Gene015120.1	Bm_scaf98 3 188 815618 815873 - 1363 815598 815893	-	6	0	FASTA:138-160	TCCCTGGCCTTGGGCTCCTCGGG	140
BM_gRNA_51	BMgn000011|Gene015118.0	Bm_scaf98 3 0 797380 797538 - 1446 797360 797558	+	7	0	FASTA:121-143	ACAGGTTCATCTCGGCCATCAGG	140
BM_gRNA_52	BMgn000011|Gene015118.1	Bm_scaf98 3 159 796823 797075 - 1446 796803 797095	-	6	0	FASTA:58-80	ATCAACTACCGTCAAGTCCTTGG	60
BM_gRNA_53	BMgn000011|Gene015118.2	Bm_scaf98 3 412 790965 791516 - 1446 790945 791536 Warning:CutS790483	-	7	0	FASTA:94-116	TGGCCAGGAACAAGGGGATCAGG	96
BM_gRNA_54	BMgn000011|Gene015118.0	Bm_scaf98 3 0 797380 797538 - 1446 797360 797558	-	5	0	FASTA:96-118	ATCCCATCCTCCTTCGCGACGGG	98
BM_gRNA_55	BMgn000011|Gene015118.1	Bm_scaf98 3 159 796823 797075 - 1446 796803 797095	+	6	0	FASTA:81-103	GGCATCAGCTTTTCCAGAACCGG	100
BM_gRNA_56	BMgn000012|Gene015116.0	Bm_scaf98 6 0 779233 779367 - 1494 779213 779387	+	5	0	FASTA:32-54	CATCGCGTTATTAGCCTTGACGG	51
BM_gRNA_57	BMgn000012|Gene015116.1	Bm_scaf98 6 135 778705 778957 - 1494 778685 778977	-	6	0	FASTA:109-131	CTCGTAGCTGCGGGCAGATCGGG	111
BM_gRNA_58	BMgn000012|Gene015116.2	Bm_scaf98 6 388 777546 777872 - 1494 777526 777892	+	6	0	FASTA:92-114	GCTCTGATCCCACTTTTCCTGGG	111
BM_gRNA_59	BMgn000012|Gene015116.0	Bm_scaf98 6 0 779233 779367 - 1494 779213 779387	-	5	0	FASTA:72-94	GATATGCTGTTCTCTTTCAGCGG	74
BM_gRNA_60	BMgn000012|Gene015116.1	Bm_scaf98 6 135 778705 778957 - 1494 778685 778977	-	6	0	FASTA:247-269	ATCATCCAAACTCCTAGACTCGG	249
BM_gRNA_61	BMgn000013|Gene015114.0	Bm_scaf98 3 0 733493 733680 - 1300 733473 733700	+	6	0	FASTA:140-162	GACGTCTTCCGATCAGTGATGGG	159
BM_gRNA_62	BMgn000013|Gene015114.1	Bm_scaf98 3 188 732482 732737 - 1300 732462 732757	+	6	0	FASTA:100-122	AAGGCTCCCCTAGATCAGCCAGG	119
BM_gRNA_63	BMgn000013|Gene015114.2	Bm_scaf98 3 444 724349 724770 - 1300 724329 724790 Warning:CutS723915	-	6	0	FASTA:126-148	TAACATAAGACCCTTGACGGCGG	128
BM_gRNA_64	BMgn000013|Gene015114.0	Bm_scaf98 3 0 733493 733680 - 1300 733473 733700	+	5	0	FASTA:187-209	CAACGTCGCATTGTGTCTCAAGG	206
BM_gRNA_65	BMgn000013|Gene015114.1	Bm_scaf98 3 188 732482 732737 - 1300 732462 732757	-	6	0	FASTA:147-169	ACTTGATTCTCCCTGGCTCTGGG	149
BM_gRNA_66	BMgn000014|Gene015111.0	Bm_scaf98 5 0 672678 673097 - 1447 672658 673117	-	6	0	FASTA:275-297	CTTGCCTGCCTTGTCGCCAACGG	277
BM_gRNA_67	BMgn000014|Gene015111.0	Bm_scaf98 5 0 672678 673097 - 1447 672658 673117	-	5	0	FASTA:156-178	GTTACAGTCCAGTTCCACAATGG	158
BM_gRNA_68	BMgn000014|Gene015111.0	Bm_scaf98 5 0 672678 673097 - 1447 672658 673117	-	5	0	FASTA:206-228	AAATTCACGATCAGCTGCTTTGG	208
BM_gRNA_69	BMgn000014|Gene015111.0	Bm_scaf98 5 0 672678 673097 - 1447 672658 673117	-	5	0	FASTA:325-347	AGCTAACGGCATGATTCTCAAGG	327
BM_gRNA_70	BMgn000014|Gene015111.0	Bm_scaf98 5 0 672678 673097 - 1447 672658 673117	-	5	0	FASTA:380-402	GCGTTAGTATTGTCTTCACGAGG	382
BM_gRNA_71	BMgn000016|Gene015106.2	Bm_scaf98 4 502 457818 458051 - 1746 457798 458071	-	6	0	FASTA:82-104	GACCACGCAGACCAGGGCATCGG	84
BM_gRNA_72	BMgn000016|Gene015106.2	Bm_scaf98 4 502 457818 458051 - 1746 457798 458071	-	6	0	FASTA:153-175	TTGCACAAACTTGGCCAGTCCGG	155
BM_gRNA_73	BMgn000016|Gene015106.2	Bm_scaf98 4 502 457818 458051 - 1746 457798 458071	-	6	0	FASTA:191-213	ACACGAAGATCGATATAGCTTGG	193
BM_gRNA_74	BMgn000016|Gene015106.2	Bm_scaf98 4 502 457818 458051 - 1746 457798 458071	-	6	0	FASTA:223-245	ATCAAGGGCAATGGCAGTTATGG	225
BM_gRNA_75	BMgn000016|Gene015106.2	Bm_scaf98 4 502 457818 458051 - 1746 457798 458071	-	5	0	FASTA:109-131	GAGTTCCATAAGAGTCAGCGGGG	111
BM_gRNA_76	BMgn000017|Gene015102.0	Bm_scaf98 2 0 410743 410887 - 303 410723 410907	+	5	0	FASTA:114-136	TTTCGCCACGGCTTCGGTCTCGG	133
BM_gRNA_77	BMgn000017|Gene015102.0	Bm_scaf98 2 0 410743 410887 - 303 410723 410907	-	5	0	FASTA:142-164	AGATCCTTGAAGAAGTTGCCGGG	144
BM_gRNA_78	BMgn000017|Gene015102.0	Bm_scaf98 2 0 410743 410887 - 303 410723 410907	+	4	0	FASTA:102-124	GTTCGCTATTGTTTTCGCCACGG	121
BM_gRNA_79	BMgn000017|Gene015102.0	Bm_scaf98 2 0 410743 410887 - 303 410723 410907	+	5	0	FASTA:124-146	GCTTCGGTCTCGGCAGCTCCCGG	143
BM_gRNA_80	BMgn000017|Gene015102.0	Bm_scaf98 2 0 410743 410887 - 303 410723 410907	-	4	0	FASTA:119-141	AGCTGCCGAGACCGAAGCCGTGG	121
BM_gRNA_81	BMgn000018|Gene015101.1	Bm_scaf98 2 139 401003 401241 - 568 400983 401261 Warning:CutS400813	-	3	0	FASTA:28-50	GGCGTCGCGTGTCCTCGCCACGG	30
BM_gRNA_82	BMgn000018|Gene015101.1	Bm_scaf98 2 139 401003 401241 - 568 400983 401261 Warning:CutS400813	-	3	0	FASTA:66-88	GCCGCCACCGTCGCCACCGCCGG	68
BM_gRNA_83	BMgn000018|Gene015101.1	Bm_scaf98 2 139 401003 401241 - 568 400983 401261 Warning:CutS400813	-	3	1	FASTA:91-113	CTAGCCAGACGCGACGGCGCTGG	93
BM_gRNA_84	BMgn000018|Gene015101.1	Bm_scaf98 2 139 401003 401241 - 568 400983 401261 Warning:CutS400813	+	3	0	FASTA:87-109	GCAGCCAGCGCCGTCGCGTCTGG	106
BM_gRNA_85	BMgn000018|Gene015101.1	Bm_scaf98 2 139 401003 401241 - 568 400983 401261 Warning:CutS400813	-	5	0	FASTA:115-137	GTGATGGGGTTTGGTGTGCTGGG	117
BM_gRNA_86	BMgn000019|Gene015098.2	Bm_scaf98 4 194 390205 390308 - 447 390185 390328 Warning:CutS390136	-	4	0	FASTA:21-43	AGTTCTGCTTGTTTACGTACCGG	23
BM_gRNA_87	BMgn000020|Gene015096.0	Bm_scaf98 2 0 362437 362538 - 192 362417 362558	-	5	0	FASTA:38-60	TGAGCGCTAAGACGACGCACAGG	40
BM_gRNA_88	BMgn000020|Gene015096.1	Bm_scaf98 2 102 361256 361281 - 192 361236 361301 Warning:CutS361192	+	5	0	FASTA:24-46	AAGATTGGTCGCAATGTCCGCGG	43
BM_gRNA_89	BMgn000020|Gene015096.0	Bm_scaf98 2 0 362437 362538 - 192 362417 362558	-	4	0	FASTA:85-107	CTTCCGTTTGGGTTCAAGCGCGG	87
BM_gRNA_90	BMgn000020|Gene015096.0	Bm_scaf98 2 0 362437 362538 - 192 362417 362558	-	4	0	FASTA:97-119	TATTTTGAAGACCTTCCGTTTGG	99
BM_gRNA_91	BMgn000020|Gene015096.0	Bm_scaf98 2 0 362437 362538 - 192 362417 362558	+	5	0	FASTA:44-66	CGTCGTCTTAGCGCTCATGCTGG	63
BM_gRNA_92	BMgn000021|Gene015095.1	Bm_scaf98 2 105 359800 359945 - 377 359780 359965 Warning:CutS359674	-	2	1	FASTA:97-119	TTTTAAAGATTATTTTCCTATGG	99
BM_gRNA_93	BMgn000022|Gene015094.0	Bm_scaf98 2 0 356995 357126 - 600 356975 357146	-	6	0	FASTA:82-104	GGCTGGCAGGTCTGGAACGCTGG	84
BM_gRNA_94	BMgn000022|Gene015094.1	Bm_scaf98 2 132 356600 356867 - 600 356580 356887 Warning:CutS356400	-	6	0	FASTA:38-60	GGCGTGGGCTGCAGCACTTCTGG	40
BM_gRNA_95	BMgn000022|Gene015094.0	Bm_scaf98 2 0 356995 357126 - 600 356975 357146	+	4	0	FASTA:131-153	AGAGAGCCAATATTTACTCCAGG	150
BM_gRNA_96	BMgn000022|Gene015094.1	Bm_scaf98 2 132 356600 356867 - 600 356580 356887 Warning:CutS356400	-	5	0	FASTA:99-121	TGAGTGATAGGGTATGGAGGTGG	101
BM_gRNA_97	BMgn000022|Gene015094.1	Bm_scaf98 2 132 356600 356867 - 600 356580 356887 Warning:CutS356400	-	5	0	FASTA:144-166	CCGTCATGCTCTTGAAAGTCCGG	146
BM_gRNA_98	BMgn000025|Gene015091.0	Bm_scaf98 7 0 272816 273377 - 1440 272796 273397	+	6	0	FASTA:552-574	CCAAAAGCTGCTAAGTTTATGGG	571
BM_gRNA_99	BMgn000025|Gene015091.1	Bm_scaf98 7 562 271813 271935 - 1440 271793 271955	+	6	0	FASTA:42-64	TCCTGCCGCTGCTGATCGGAGGG	61
BM_gRNA_100	BMgn000025|Gene015091.2	Bm_scaf98 7 685 269018 269210 - 1440 268998 269230	+	6	0	FASTA:46-68	CAGTCAAGCTAGCTATCCCCCGG	65
BM_gRNA_101	BMgn000025|Gene015091.0	Bm_scaf98 7 0 272816 273377 - 1440 272796 273397	+	5	0	FASTA:33-55	AAACAAACATCACGCTGGACCGG	52
BM_gRNA_102	BMgn000025|Gene015091.1	Bm_scaf98 7 562 271813 271935 - 1440 271793 271955	-	6	0	FASTA:104-126	CCGAAGCTACCGAGGATACTTGG	106
BM_gRNA_103	BMgn000026|Gene015090.1	Bm_scaf98 6 197 217526 217634 - 1682 217506 217654	-	5	0	FASTA:76-98	CTGTCTCTTCAGCTAGCACTTGG	78
BM_gRNA_104	BMgn000026|Gene015090.2	Bm_scaf98 6 306 216618 216766 - 1682 216598 216786	-	5	0	FASTA:72-94	GGAAACTGGGAGCTTCGATGAGG	74
BM_gRNA_105	BMgn000026|Gene015090.2	Bm_scaf98 6 306 216618 216766 - 1682 216598 216786	+	4	0	FASTA:19-41	AGATTCGTGAAGATATTAGAAGG	38
BM_gRNA_106	BMgn000026|Gene015090.2	Bm_scaf98 6 306 216618 216766 - 1682 216598 216786	-	4	0	FASTA:48-70	TGCTATCCTGCTGAAAATCTAGG	50
BM_gRNA_107	BMgn000026|Gene015090.2	Bm_scaf98 6 306 216618 216766 - 1682 216598 216786	+	4	0	FASTA:109-131	AAGCAAGATGAAAACGATGAAGG	128
BM_gRNA_108	BMgn000027|Gene015087.0	Bm_scaf98 12 0 180045 180095 - 2274 180025 180115	-	4	0	FASTA:34-56	GCACATGACGTGAGCTCCTTCGG	36
BM_gRNA_109	BMgn000027|Gene015087.1	Bm_scaf98 12 51 179389 179477 - 2274 179369 179497	-	6	0	FASTA:51-73	GCAGTCATGCTAATGTTCCGAGG	53
BM_gRNA_110	BMgn000027|Gene015087.2	Bm_scaf98 12 140 176327 176408 - 2274 176307 176428	+	5	0	FASTA:34-56	ATCGCCAGCGGCAAAGAACACGG	53
BM_gRNA_111	BMgn000027|Gene015087.1	Bm_scaf98 12 51 179389 179477 - 2274 179369 179497	-	4	0	FASTA:82-104	GGACACGTCCAGTAATTTCTTGG	84
BM_gRNA_112	BMgn000027|Gene015087.2	Bm_scaf98 12 140 176327 176408 - 2274 176307 176428	+	5	0	FASTA:61-83	GGACGGCAGTACTTGCCTCGAGG	80
BM_gRNA_113	BMgn000028|Gene015085.0	Bm_scaf98 3 0 123489 123555 - 301 123469 123575	+	8	0	FASTA:53-75	GTGTCTCGTCAACCGGCCGGAGG	72
BM_gRNA_114	BMgn000028|Gene015085.1	Bm_scaf98 3 67 121520 121647 - 301 121500 121667	-	5	0	FASTA:24-46	CAGTCCGGCTTTGAGACCCGGGG	26
BM_gRNA_115	BMgn000028|Gene015085.2	Bm_scaf98 3 195 120767 120771 - 301 120747 120791 Warning:CutS120666	-	5	0	FASTA:22-44	GGAGCAGTCGGCGGGGTAGGCGG	24
BM_gRNA_116	BMgn000028|Gene015085.0	Bm_scaf98 3 0 123489 123555 - 301 123469 123575	-	4	0	FASTA:30-52	ATGAGGTGCTCCTGGCAGTGCGG	32
BM_gRNA_117	BMgn000028|Gene015085.1	Bm_scaf98 3 67 121520 121647 - 301 121500 121667	+	5	0	FASTA:46-68	GACGAAGCTCAGCAGCTTAGTGG	65
BM_gRNA_118	BMgn000029|Gene015083.0	Bm_scaf98 2 0 111575 111882 - 1228 111555 111902	-	5	0	FASTA:128-150	CTTTAATGCTGACATCAGCCTGG	130
BM_gRNA_119	BMgn000029|Gene015083.1	Bm_scaf98 2 308 110414 110923 - 1228 110394 110943 Warning:CutS110004	+	6	0	FASTA:66-88	TCACCTACCTGCGGTTTGCGAGG	85
BM_gRNA_120	BMgn000029|Gene015083.0	Bm_scaf98 2 0 111575 111882 - 1228 111555 111902	-	5	0	FASTA:263-285	CGTTTCTGATATAGTTCTTATGG	265
BM_gRNA_121	BMgn000029|Gene015083.1	Bm_scaf98 2 308 110414 110923 - 1228 110394 110943 Warning:CutS110004	-	6	0	FASTA:140-162	GCATCCTCGCATTGTACCCATGG	142
BM_gRNA_122	BMgn000029|Gene015083.0	Bm_scaf98 2 0 111575 111882 - 1228 111555 111902	+	5	0	FASTA:297-319	GTTCAGAAGCAGTTACGTCTGGG	316
BM_gRNA_123	BMgn000030|Gene015080.0	Bm_scaf98 9 0 59198 59327 - 1524 59178 59347	+	5	0	FASTA:44-66	GGCTTTGCTAACAGCGTGCGTGG	63
BM_gRNA_124	BMgn000030|Gene015080.1	Bm_scaf98 9 130 57785 57927 - 1524 57765 57947	-	6	0	FASTA:134-156	GGTCCTTCGGTGCCTCTGGGTGG	136
BM_gRNA_125	BMgn000030|Gene015080.2	Bm_scaf98 9 273 57162 57310 - 1524 57142 57330	-	6	0	FASTA:106-128	CTTCAGCTCGACTTCGTGGCTGG	108
BM_gRNA_126	BMgn000030|Gene015080.0	Bm_scaf98 9 0 59198 59327 - 1524 59178 59347	-	5	0	FASTA:70-92	GACGGCCGTATGCACCTGAGCGG	72
BM_gRNA_127	BMgn000030|Gene015080.1	Bm_scaf98 9 130 57785 57927 - 1524 57765 57947	-	5	0	FASTA:28-50	ACGCGTGAAACCGGTACTGCTGG	30
BM_gRNA_128	BMgn000031|Gene015079.2	Bm_scaf98 13 274 29255 29388 + 2067 29235 29408	+	6	0	FASTA:26-48	TAATGGCGTTGTTAGCGACGTGG	45
BM_gRNA_129	BMgn000031|Gene015079.2	Bm_scaf98 13 274 29255 29388 + 2067 29235 29408	-	5	0	FASTA:70-92	TGAGGGAAGCTCGGCTCCATTGG	72
BM_gRNA_130	BMgn000031|Gene015079.2	Bm_scaf98 13 274 29255 29388 + 2067 29235 29408	+	4	0	FASTA:96-118	CAGGATCACTCACATACTGAAGG	115
BM_gRNA_131	BMgn000031|Gene015079.2	Bm_scaf98 13 274 29255 29388 + 2067 29235 29408	-	4	0	FASTA:131-153	GCTATCATCATAAATGACAAGGG	133
BM_gRNA_132	BMgn000031|Gene015079.2	Bm_scaf98 13 274 29255 29388 + 2067 29235 29408	+	4	0	FASTA:54-76	AGGAGCAGCGTACGTACCAATGG	73
BM_gRNA_133	BMgn000032|Gene015081.1	Bm_scaf98 8 289 74338 74568 + 1330 74318 74588	+	6	0	FASTA:41-63	ATGGACGTCGGAATTCCTCCAGG	60
BM_gRNA_134	BMgn000032|Gene015081.2	Bm_scaf98 8 520 74919 75086 + 1330 74899 75106	-	5	0	FASTA:23-45	GCGCAAAGTACATGTTGCCCAGG	25
BM_gRNA_135	BMgn000032|Gene015081.1	Bm_scaf98 8 289 74338 74568 + 1330 74318 74588	-	5	0	FASTA:70-92	TATGAACTTCGGATCCATTCTGG	72
BM_gRNA_136	BMgn000032|Gene015081.2	Bm_scaf98 8 520 74919 75086 + 1330 74899 75106	+	5	0	FASTA:53-75	GCTCGTCGACCTCAAGATATGGG	72
BM_gRNA_137	BMgn000032|Gene015081.1	Bm_scaf98 8 289 74338 74568 + 1330 74318 74588	+	5	0	FASTA:92-114	AGCGTTGCATCTGCAGGAAGTGG	111
BM_gRNA_138	BMgn000033|Gene015082.0	Bm_scaf98 7 0 90489 90555 + 864 90469 90575	-	4	0	FASTA:68-90	TACGAAGCTGATAAAGCACTTGG	70
BM_gRNA_139	BMgn000033|Gene015082.1	Bm_scaf98 7 67 91151 91287 + 864 91131 91307	+	5	0	FASTA:68-90	CGCAACGATGAGCACGACAACGG	87
BM_gRNA_140	BMgn000033|Gene015082.2	Bm_scaf98 7 204 94692 94805 + 864 94672 94825	-	6	0	FASTA:53-75	GACTGGTTCTCGTCAGTTCCGGG	55
BM_gRNA_141	BMgn000033|Gene015082.1	Bm_scaf98 7 67 91151 91287 + 864 91131 91307	-	5	0	FASTA:118-140	GTATGTAGCGCGACTCGGGCGGG	120
BM_gRNA_142	BMgn000033|Gene015082.2	Bm_scaf98 7 204 94692 94805 + 864 94672 94825	+	5	0	FASTA:28-50	GTCAAGCGTCTGAATTGCTCGGG	47
BM_gRNA_143	BMgn000034|Gene015084.0	Bm_scaf98 5 0 112066 112116 + 594 112046 112136	+	4	0	FASTA:40-62	CTAAGAAGCTAGTTACTGAATGG	59
BM_gRNA_144	BMgn000034|Gene015084.1	Bm_scaf98 5 51 112522 112782 + 594 112502 112802	+	5	0	FASTA:81-103	CTGTTAGGGCTGGACAATGCTGG	100
BM_gRNA_145	BMgn000034|Gene015084.2	Bm_scaf98 5 312 113711 113794 + 594 113691 113814 Warning:CutE113843	+	6	0	FASTA:35-57	TTGTTCAGATCACCATAGACTGG	54
BM_gRNA_146	BMgn000034|Gene015084.1	Bm_scaf98 5 51 112522 112782 + 594 112502 112802	+	5	0	FASTA:220-242	TCGGTGGACAGAGGAAGATCAGG	239
BM_gRNA_147	BMgn000034|Gene015084.2	Bm_scaf98 5 312 113711 113794 + 594 113691 113814 Warning:CutE113843	-	4	0	FASTA:64-86	CAGCTCGGCTAATTCTAGACTGG	66
BM_gRNA_148	BMgn000035|Gene015089.1	Bm_scaf98 2 95 192352 192639 + 575 192332 192659 Warning:CutE192831	-	6	0	FASTA:75-97	TGGTCATCGTATGCTATCGCTGG	77
BM_gRNA_149	BMgn000035|Gene015089.1	Bm_scaf98 2 95 192352 192639 + 575 192332 192659 Warning:CutE192831	-	6	0	FASTA:222-244	TCTGTTCTGAACGTGCCCATTGG	224
BM_gRNA_150	BMgn000035|Gene015089.1	Bm_scaf98 2 95 192352 192639 + 575 192332 192659 Warning:CutE192831	-	5	0	FASTA:126-148	ATCTTCTGGATCGTGCTCTTCGG	128
BM_gRNA_151	BMgn000035|Gene015089.1	Bm_scaf98 2 95 192352 192639 + 575 192332 192659 Warning:CutE192831	-	5	0	FASTA:188-210	GTGTGGGCTTTGTCATCTGATGG	190
BM_gRNA_152	BMgn000035|Gene015089.1	Bm_scaf98 2 95 192352 192639 + 575 192332 192659 Warning:CutE192831	-	4	0	FASTA:24-46	ATATACGTAGAGTTGTGTTGTGG	26
BM_gRNA_153	BMgn000038|Gene015099.0	Bm_scaf98 1 0 393470 394065 + 894 393450 394085 Warning:CutE394363	+	5	0	FASTA:493-515	TTCGGTTATCAATTGCGTCTAGG	512
BM_gRNA_154	BMgn000038|Gene015099.0	Bm_scaf98 1 0 393470 394065 + 894 393450 394085 Warning:CutE394363	+	2	0	FASTA:525-547	CGTTCTGATCAGAAAGAGACAGG	544
BM_gRNA_155	BMgn000038|Gene015099.0	Bm_scaf98 1 0 393470 394065 + 894 393450 394085 Warning:CutE394363	-	2	0	FASTA:589-611	AAAATAAAACAATTAGTCTGTGG	591
BM_gRNA_156	BMgn000038|Gene015099.0	Bm_scaf98 1 0 393470 394065 + 894 393450 394085 Warning:CutE394363	+	4	0	FASTA:494-516	TCGGTTATCAATTGCGTCTAGGG	513
BM_gRNA_157	BMgn000039|Gene015103.1	Bm_scaf98 2 139 434308 434542 + 561 434288 434562 Warning:CutE434729	+	5	0	FASTA:63-85	GGTCCGGCGGTGGCGACGGTAGG	82
BM_gRNA_158	BMgn000039|Gene015103.1	Bm_scaf98 2 139 434308 434542 + 561 434288 434562 Warning:CutE434729	-	6	0	FASTA:116-138	TGTGATGGGGACCGGTGTGCTGG	118
BM_gRNA_159	BMgn000039|Gene015103.1	Bm_scaf98 2 139 434308 434542 + 561 434288 434562 Warning:CutE434729	-	4	0	FASTA:94-116	GGTCTAGCCGGACGCGACGGCGG	96
BM_gRNA_160	BMgn000039|Gene015103.1	Bm_scaf98 2 139 434308 434542 + 561 434288 434562 Warning:CutE434729	+	5	0	FASTA:105-127	TCCGGCTAGACCCAGCACACCGG	124
BM_gRNA_161	BMgn000039|Gene015103.1	Bm_scaf98 2 139 434308 434542 + 561 434288 434562 Warning:CutE434729	-	5	0	FASTA:124-146	CTGCGAGCTGTGATGGGGACCGG	126
BM_gRNA_162	BMgn000040|Gene015107.0	Bm_scaf98 1 0 586161 586446 + 429 586141 586466 Warning:CutE586589	+	6	0	FASTA:227-249	CAGTCTGGTCCCGTTAGATGTGG	246
BM_gRNA_163	BMgn000040|Gene015107.0	Bm_scaf98 1 0 586161 586446 + 429 586141 586466 Warning:CutE586589	-	6	0	FASTA:253-275	CTTCACGCCCAAGCTGTTGATGG	255
BM_gRNA_164	BMgn000040|Gene015107.0	Bm_scaf98 1 0 586161 586446 + 429 586141 586466 Warning:CutE586589	+	5	0	FASTA:69-91	CGGTCAAATGTGACCGAAGATGG	88
BM_gRNA_165	BMgn000040|Gene015107.0	Bm_scaf98 1 0 586161 586446 + 429 586141 586466 Warning:CutE586589	+	5	0	FASTA:113-135	CAGCTGCTTTGTTAAGGGAGAGG	132
BM_gRNA_166	BMgn000040|Gene015107.0	Bm_scaf98 1 0 586161 586446 + 429 586141 586466 Warning:CutE586589	+	4	0	FASTA:29-51	ATTACTCATCGTCTTATTCATGG	48
BM_gRNA_167	BMgn000041|Gene015108.0	Bm_scaf98 1 0 602968 603089 + 183 602948 603109 Warning:CutE603150	-	5	0	FASTA:24-46	CTGCCGAAGTAGGAATAATGCGG	26
BM_gRNA_168	BMgn000041|Gene015108.0	Bm_scaf98 1 0 602968 603089 + 183 602948 603109 Warning:CutE603150	-	5	0	FASTA:49-71	CGAATTGAAGTCGCTGCTATCGG	51
BM_gRNA_169	BMgn000041|Gene015108.0	Bm_scaf98 1 0 602968 603089 + 183 602948 603109 Warning:CutE603150	+	5	0	FASTA:80-102	CAGCAGCTACGCCTACTCCTCGG	99
BM_gRNA_170	BMgn000041|Gene015108.0	Bm_scaf98 1 0 602968 603089 + 183 602948 603109 Warning:CutE603150	-	4	0	FASTA:131-153	TGTTCTTTGGAGAATACGCTCGG	133
BM_gRNA_171	BMgn000041|Gene015108.0	Bm_scaf98 1 0 602968 603089 + 183 602948 603109 Warning:CutE603150	+	5	0	FASTA:101-123	GGGAGCAGGGGGAAAAGACTGGG	120
BM_gRNA_172	BMgn000042|Gene015109.1	Bm_scaf98 5 149 623880 624034 + 1235 623860 624054	-	6	0	FASTA:34-56	GGCACTCAACCCCCGCTTGATGG	36
BM_gRNA_173	BMgn000042|Gene015109.2	Bm_scaf98 5 304 626814 627013 + 1235 626794 627033	-	6	0	FASTA:52-74	CCGGCTCTGGCTAGGGATTCTGG	54
BM_gRNA_174	BMgn000042|Gene015109.1	Bm_scaf98 5 149 623880 624034 + 1235 623860 624054	-	5	0	FASTA:79-101	CAGCTCGTGGACGATGCATGAGG	81
BM_gRNA_175	BMgn000042|Gene015109.2	Bm_scaf98 5 304 626814 627013 + 1235 626794 627033	-	5	0	FASTA:90-112	CCATGATAAGTTGTTGGGCTTGG	92
BM_gRNA_176	BMgn000042|Gene015109.1	Bm_scaf98 5 149 623880 624034 + 1235 623860 624054	-	5	0	FASTA:133-155	GTCGTCACTGATCTGGACTGCGG	135
BM_gRNA_177	BMgn000043|Gene015112.0	Bm_scaf98 3 0 690486 690771 + 492 690466 690791	+	5	0	FASTA:81-103	AAGGACATCGATTTGGCCGACGG	100
BM_gRNA_178	BMgn000043|Gene015112.1	Bm_scaf98 3 286 695243 695284 + 492 695223 695304 Warning:CutE695355	-	4	0	FASTA:24-46	GCCATCGCCTTTTCCCCTTCCGG	26
BM_gRNA_179	BMgn000043|Gene015112.0	Bm_scaf98 3 0 690486 690771 + 492 690466 690791	+	5	0	FASTA:119-141	TATACCGGTACCGAAAACGCTGG	138
BM_gRNA_180	BMgn000043|Gene015112.0	Bm_scaf98 3 0 690486 690771 + 492 690466 690791	+	5	0	FASTA:177-199	CGAATGGCGAAGTTCTTGCAGGG	196
BM_gRNA_181	BMgn000043|Gene015112.0	Bm_scaf98 3 0 690486 690771 + 492 690466 690791	+	5	0	FASTA:218-240	GCTCCCGAAGTTGATAGAGAAGG	237
BM_gRNA_182	BMgn000044|Gene015113.0	Bm_scaf98 1 0 711715 712404 + 1035 711695 712424 Warning:CutE712749	-	6	0	FASTA:89-111	TTTCAGAGTACGACGTATCTTGG	91
BM_gRNA_183	BMgn000044|Gene015113.0	Bm_scaf98 1 0 711715 712404 + 1035 711695 712424 Warning:CutE712749	-	6	0	FASTA:268-290	TGAAAGTGGGTCGAGAGATCTGG	270
BM_gRNA_184	BMgn000044|Gene015113.0	Bm_scaf98 1 0 711715 712404 + 1035 711695 712424 Warning:CutE712749	-	6	0	FASTA:651-673	GTGTGACTAGATGTATGCTGAGG	653
BM_gRNA_185	BMgn000044|Gene015113.0	Bm_scaf98 1 0 711715 712404 + 1035 711695 712424 Warning:CutE712749	+	5	0	FASTA:171-193	TCATACGTGGACAAGTATATAGG	190
BM_gRNA_186	BMgn000044|Gene015113.0	Bm_scaf98 1 0 711715 712404 + 1035 711695 712424 Warning:CutE712749	+	5	0	FASTA:201-223	GATTCGTTCGCTCTTACCGATGG	220
BM_gRNA_187	BMgn000045|Gene015115.0	Bm_scaf98 3 0 758833 759004 + 879 758813 759024	+	6	0	FASTA:114-136	TGCTGAACGAGATAGCACCTTGG	133
BM_gRNA_188	BMgn000045|Gene015115.1	Bm_scaf98 3 172 759551 759797 + 879 759531 759817	-	7	0	FASTA:133-155	TGCGTCTCTGGCCTCAGGGTCGG	135
BM_gRNA_189	BMgn000045|Gene015115.2	Bm_scaf98 3 419 763726 763892 + 879 763706 763912 Warning:CutE764185	-	6	0	FASTA:159-181	CCAGGCCACGAAGAGAATAACGG	161
BM_gRNA_190	BMgn000045|Gene015115.0	Bm_scaf98 3 0 758833 759004 + 879 758813 759024	-	5	0	FASTA:143-165	GCAGTCCTGGACGAAGCTAATGG	145
BM_gRNA_191	BMgn000045|Gene015115.1	Bm_scaf98 3 172 759551 759797 + 879 759531 759817	+	6	0	FASTA:40-62	TGGAAAATGCTAGAACGTCGAGG	59
BM_gRNA_192	BMgn000046|Gene015123.0	Bm_scaf98 4 0 841928 842229 + 945 841908 842249	+	5	0	FASTA:102-124	ATCAATGAGAATGTTGTGCAGGG	121
BM_gRNA_193	BMgn000046|Gene015123.1	Bm_scaf98 4 302 844028 844215 + 945 844008 844235	-	6	0	FASTA:53-75	GTCCCAGTGGAGAGATCTTTTGG	55
BM_gRNA_194	BMgn000046|Gene015123.2	Bm_scaf98 4 490 845711 845850 + 945 845691 845870 Warning:CutE845971	-	5	0	FASTA:50-72	AATTTGAATCCCAACAGGAATGG	52
BM_gRNA_195	BMgn000046|Gene015123.0	Bm_scaf98 4 0 841928 842229 + 945 841908 842249	+	5	0	FASTA:162-184	GCAGAAGTCGGAGTTTGTTTTGG	181
BM_gRNA_196	BMgn000046|Gene015123.1	Bm_scaf98 4 302 844028 844215 + 945 844008 844235	-	6	0	FASTA:83-105	CATCACCAGTCCAGGGTACATGG	85
BM_gRNA_197	BMgn000047|Gene015126.0	Bm_scaf98 3 0 862998 863449 + 1402 862978 863469	-	5	0	FASTA:84-106	TAGTAAGAAGGACGGTTAGAAGG	86
BM_gRNA_198	BMgn000047|Gene015126.1	Bm_scaf98 3 452 868926 869053 + 1402 868906 869073	+	6	0	FASTA:104-126	GCGGGATTATTCGTGCTTGCTGG	123
BM_gRNA_199	BMgn000047|Gene015126.0	Bm_scaf98 3 0 862998 863449 + 1402 862978 863469	+	5	0	FASTA:212-234	TGTTCTTCGATCGGGCCGCCAGG	231
BM_gRNA_200	BMgn000047|Gene015126.1	Bm_scaf98 3 452 868926 869053 + 1402 868906 869073	+	5	0	FASTA:76-98	GATGGTCGCCATGATTCCCATGG	95
BM_gRNA_201	BMgn000047|Gene015126.0	Bm_scaf98 3 0 862998 863449 + 1402 862978 863469	-	5	0	FASTA:247-269	ATGTCCACTCCGTCTAGCAAAGG	249
BM_gRNA_202	BMgn000048|Gene015127.0	Bm_scaf98 2 0 885522 886041 + 819 885502 886061	+	6	0	FASTA:110-132	TTGGTCCATGAGCGGAGCGTCGG	129
BM_gRNA_203	BMgn000048|Gene015127.0	Bm_scaf98 2 0 885522 886041 + 819 885502 886061	+	6	0	FASTA:199-221	GCAGACCGAAGACTCAGAACAGG	218
BM_gRNA_204	BMgn000048|Gene015127.0	Bm_scaf98 2 0 885522 886041 + 819 885502 886061	+	6	0	FASTA:242-264	AGCTATACCACTAAAGAAGGAGG	261
BM_gRNA_205	BMgn000048|Gene015127.0	Bm_scaf98 2 0 885522 886041 + 819 885502 886061	-	5	0	FASTA:73-95	GTTCTCATAATCGTTATCAGCGG	75
BM_gRNA_206	BMgn000048|Gene015127.0	Bm_scaf98 2 0 885522 886041 + 819 885502 886061	-	5	0	FASTA:267-289	TAGGCGTTCCTCTCAATTTGTGG	269
BM_gRNA_207	BMgn000049|Gene015128.0	Bm_scaf98 3 0 891610 891787 + 669 891590 891807	-	5	0	FASTA:34-56	GTTGTCCAATATCAGGCCTCGGG	36
BM_gRNA_208	BMgn000049|Gene015128.1	Bm_scaf98 3 178 892589 892856 + 669 892569 892876 Warning:CutE892858	+	5	0	FASTA:95-117	GAACATAAACGTAAAAGACGCGG	114
BM_gRNA_209	BMgn000049|Gene015128.0	Bm_scaf98 3 0 891610 891787 + 669 891590 891807	-	5	0	FASTA:147-169	TGTGTGAATAGCCAGCTATAAGG	149
BM_gRNA_210	BMgn000049|Gene015128.1	Bm_scaf98 3 178 892589 892856 + 669 892569 892876 Warning:CutE892858	+	5	0	FASTA:208-230	GCCGGTAATTTTGGGGTTGTTGG	227
BM_gRNA_211	BMgn000049|Gene015128.1	Bm_scaf98 3 178 892589 892856 + 669 892569 892876 Warning:CutE892858	-	5	0	FASTA:252-274	TGCCAAAGCTTTCAACGCTATGG	254
BM_gRNA_212	BMgn000050|Gene015131.0	Bm_scaf98 4 0 901635 901744 + 525 901615 901764	+	6	0	FASTA:50-72	GGTGGCCTGTACCGCAGCCCCGG	69
BM_gRNA_213	BMgn000050|Gene015131.1	Bm_scaf98 4 110 902947 903026 + 525 902927 903046	-	5	0	FASTA:26-48	GTTTAGCTTATCCTCGCCTGTGG	28
BM_gRNA_214	BMgn000050|Gene015131.2	Bm_scaf98 4 190 907602 907761 + 525 907582 907781 Warning:CutE907801	+	6	0	FASTA:44-66	ACACCCCTGCTCGCCGGGATCGG	63
BM_gRNA_215	BMgn000050|Gene015131.0	Bm_scaf98 4 0 901635 901744 + 525 901615 901764	+	5	0	FASTA:73-95	GCACCCAGGGCGAGGATGAAGGG	92
BM_gRNA_216	BMgn000050|Gene015131.1	Bm_scaf98 4 110 902947 903026 + 525 902927 903046	-	4	0	FASTA:61-83	GCTGCCTCTCTGAGTTCACCAGG	63
BM_gRNA_217	BMgn000051|Gene015132.0	Bm_scaf98 2 0 918680 919172 + 747 918660 919192	-	6	0	FASTA:118-140	TCCTCCGTTGCAGTCGACCTTGG	120
BM_gRNA_218	BMgn000051|Gene015132.0	Bm_scaf98 2 0 918680 919172 + 747 918660 919192	-	6	0	FASTA:415-437	TGCTTCTCCGACCAAAGCCCTGG	417
BM_gRNA_219	BMgn000051|Gene015132.0	Bm_scaf98 2 0 918680 919172 + 747 918660 919192	+	5	0	FASTA:32-54	GTACATTCTAACGTTAGCGGCGG	51
BM_gRNA_220	BMgn000051|Gene015132.0	Bm_scaf98 2 0 918680 919172 + 747 918660 919192	-	5	0	FASTA:75-97	GGTTCTGTGGGTTTTGGTTCAGG	77
BM_gRNA_221	BMgn000051|Gene015132.0	Bm_scaf98 2 0 918680 919172 + 747 918660 919192	+	5	0	FASTA:378-400	AGGCTTAGGTTGCTTGATGATGG	397
BM_gRNA_222	BMgn000052|Gene015133.0	Bm_scaf98 2 0 927296 927677 + 669 927276 927697	-	6	0	FASTA:115-137	AGCTATTTCCTCGGCCGTAGTGG	117
BM_gRNA_223	BMgn000052|Gene015133.1	Bm_scaf98 2 382 930090 930153 + 669 930070 930173 Warning:CutE930376	+	5	0	FASTA:43-65	AGGAGCCTTAGCGCTGTTAGCGG	62
BM_gRNA_224	BMgn000052|Gene015133.0	Bm_scaf98 2 0 927296 927677 + 669 927276 927697	-	6	0	FASTA:206-228	AGTGCCCATCCAGGTAGTCTTGG	208
BM_gRNA_225	BMgn000052|Gene015133.0	Bm_scaf98 2 0 927296 927677 + 669 927276 927697	+	5	0	FASTA:41-63	AGAAGACTTGAGCTCGCGAGAGG	60
BM_gRNA_226	BMgn000052|Gene015133.0	Bm_scaf98 2 0 927296 927677 + 669 927276 927697	-	5	0	FASTA:78-100	TCTCTGATGATACTCAATCCGGG	80
BM_gRNA_227	BMgn000053|Gene015134.0	Bm_scaf98 7 0 933626 933866 + 1482 933606 933886	-	5	0	FASTA:121-143	TGCACTTTCGAAGATCCTATCGG	123
BM_gRNA_228	BMgn000053|Gene015134.1	Bm_scaf98 7 241 938197 938358 + 1482 938177 938378	+	6	0	FASTA:40-62	GCTGGAGGAAGATAAACCCCCGG	59
BM_gRNA_229	BMgn000053|Gene015134.2	Bm_scaf98 7 403 938442 938569 + 1482 938422 938589	+	4	0	FASTA:56-78	GGCGGCGGCGGCGGGGACCACGG	75
BM_gRNA_230	BMgn000053|Gene015134.0	Bm_scaf98 7 0 933626 933866 + 1482 933606 933886	+	5	0	FASTA:222-244	CTCAGTGAAGTGTCTGTCTTCGG	241
BM_gRNA_231	BMgn000053|Gene015134.1	Bm_scaf98 7 241 938197 938358 + 1482 938177 938378	-	6	0	FASTA:129-151	GGCCTTGACCCTTAAGGTATGGG	131
BM_gRNA_232	BMgn000054|Gene015135.1	Bm_scaf98 11 168 971006 971512 + 3611 970986 971532	-	6	0	FASTA:319-341	CGCTAGGCTCCGCTGTGCATTGG	321
BM_gRNA_233	BMgn000054|Gene015135.2	Bm_scaf98 11 675 978489 978707 + 3611 978469 978727	-	7	0	FASTA:156-178	GTGGATTAGAGCCCCGGACTTGG	158
BM_gRNA_234	BMgn000054|Gene015135.1	Bm_scaf98 11 168 971006 971512 + 3611 970986 971532	+	6	0	FASTA:452-474	GACAGGGTGAGTGCGGATGACGG	471
BM_gRNA_235	BMgn000054|Gene015135.2	Bm_scaf98 11 675 978489 978707 + 3611 978469 978727	+	5	0	FASTA:41-63	ACAAATGGCTTATACGATAAAGG	60
BM_gRNA_236	BMgn000054|Gene015135.1	Bm_scaf98 11 168 971006 971512 + 3611 970986 971532	+	5	0	FASTA:196-218	CGCCGAGTCCGCCTACAAAACGG	215
BM_gRNA_237	BMgn000055|Gene015136.1	Bm_scaf98 2 34 994389 994853 + 749 994369 994873 Warning:CutE995103	-	5	0	FASTA:128-150	GAATTTGATCGGCGTAGGTACGG	130
BM_gRNA_238	BMgn000055|Gene015136.1	Bm_scaf98 2 34 994389 994853 + 749 994369 994873 Warning:CutE995103	+	5	0	FASTA:272-294	CGTGACGAACTGCACTAAGACGG	291
BM_gRNA_239	BMgn000055|Gene015136.1	Bm_scaf98 2 34 994389 994853 + 749 994369 994873 Warning:CutE995103	+	5	0	FASTA:309-331	GATTTCGATGTACAAGATGTCGG	328
BM_gRNA_240	BMgn000055|Gene015136.1	Bm_scaf98 2 34 994389 994853 + 749 994369 994873 Warning:CutE995103	-	5	0	FASTA:459-481	ACGACATCGAATGCTGCAACAGG	461
BM_gRNA_241	BMgn000055|Gene015136.1	Bm_scaf98 2 34 994389 994853 + 749 994369 994873 Warning:CutE995103	-	4	1	FASTA:58-80	TGCGTTGAAATTTTCTGCGTTGG	60
BM_gRNA_242	BMgn000056|Gene015139.0	Bm_scaf98 8 0 1025270 1025408 + 1188 1025250 1025428	+	8	0	FASTA:77-99	GCTGCCGGGAACGGGGATCCCGG	96
BM_gRNA_243	BMgn000056|Gene015139.1	Bm_scaf98 8 139 1028444 1028533 + 1188 1028424 1028553	+	5	0	FASTA:47-69	GGAGAAGAAGCCATTAAACTAGG	66
BM_gRNA_244	BMgn000056|Gene015139.2	Bm_scaf98 8 229 1029126 1029236 + 1188 1029106 1029256	-	5	0	FASTA:31-53	CGACAACAGCGCTGTCATCCGGG	33
BM_gRNA_245	BMgn000056|Gene015139.0	Bm_scaf98 8 0 1025270 1025408 + 1188 1025250 1025428	-	5	0	FASTA:32-54	ACAACAACACGCCGAGCAAGAGG	34
BM_gRNA_246	BMgn000056|Gene015139.1	Bm_scaf98 8 139 1028444 1028533 + 1188 1028424 1028553	+	4	0	FASTA:71-93	GGGGTTGTTTCAGTGAACTTTGG	90
BM_gRNA_247	BMgn000057|Gene015141.0	Bm_scaf98 7 0 1079800 1080102 + 4444 1079780 1080122	-	6	0	FASTA:189-211	CCAGGAGTGTTAGGTCCTGAAGG	191
BM_gRNA_248	BMgn000057|Gene015141.1	Bm_scaf98 7 303 1080448 1080600 + 4444 1080428 1080620	+	5	0	FASTA:90-112	GACTGCAGTACATATTGTGAGGG	109
BM_gRNA_249	BMgn000057|Gene015141.2	Bm_scaf98 7 456 1081819 1082318 + 4444 1081799 1082338	-	7	0	FASTA:147-169	CCTGTCGGGCTCTGGCAGTTGGG	149
BM_gRNA_250	BMgn000057|Gene015141.0	Bm_scaf98 7 0 1079800 1080102 + 4444 1079780 1080122	-	6	0	FASTA:226-248	TATTTTGATTCCCTGCTGTGTGG	228
BM_gRNA_251	BMgn000057|Gene015141.1	Bm_scaf98 7 303 1080448 1080600 + 4444 1080428 1080620	-	5	0	FASTA:116-138	AGTAGGCAGTCAGACAGGCAAGG	118
BM_gRNA_252	BMgn000058|Gene015142.1	Bm_scaf98 2 37 1087298 1087872 + 918 1087278 1087892 Warning:CutE1088178	-	5	0	FASTA:268-290	CCTCAAAGATATCTTGTCCGCGG	270
BM_gRNA_253	BMgn000058|Gene015142.1	Bm_scaf98 2 37 1087298 1087872 + 918 1087278 1087892 Warning:CutE1088178	+	4	0	FASTA:268-290	CCGCGGACAAGATATCTTTGAGG	287
BM_gRNA_254	BMgn000059|Gene015143.0	Bm_scaf98 2 0 1147441 1147832 + 588 1147421 1147852 Warning:CutE1148019	+	6	0	FASTA:380-402	GTGCAGCGACGAGGACGTTCAGG	399
BM_gRNA_255	BMgn000059|Gene015143.0	Bm_scaf98 2 0 1147441 1147832 + 588 1147421 1147852 Warning:CutE1148019	+	5	0	FASTA:161-183	GAGGCTTGTCTACGAACTGCCGG	180
BM_gRNA_256	BMgn000059|Gene015143.0	Bm_scaf98 2 0 1147441 1147832 + 588 1147421 1147852 Warning:CutE1148019	+	5	0	FASTA:242-264	GAGTTGTGACGTACAGTGCGAGG	261
BM_gRNA_257	BMgn000059|Gene015143.0	Bm_scaf98 2 0 1147441 1147832 + 588 1147421 1147852 Warning:CutE1148019	+	4	0	FASTA:77-99	CGAATGCGCGAATATTGCGCAGG	96
BM_gRNA_258	BMgn000059|Gene015143.0	Bm_scaf98 2 0 1147441 1147832 + 588 1147421 1147852 Warning:CutE1148019	-	4	0	FASTA:121-143	TTTCTGCCCCGTTTCTTTATCGG	123
BM_gRNA_259	BMgn000060|Gene015144.0	Bm_scaf98 14 0 1198144 1198307 + 2559 1198124 1198327	+	6	0	FASTA:117-139	GGAATGCATACGCCGATCCCAGG	136
BM_gRNA_260	BMgn000060|Gene015144.1	Bm_scaf98 14 164 1199182 1199350 + 2559 1199162 1199370	+	6	0	FASTA:39-61	CGCTCGGACTGGCTACAAGACGG	58
BM_gRNA_261	BMgn000060|Gene015144.2	Bm_scaf98 14 333 1199941 1200309 + 2559 1199921 1200329	-	6	0	FASTA:40-62	GGAATACCAGTGCGAGGCCACGG	42
BM_gRNA_262	BMgn000060|Gene015144.0	Bm_scaf98 14 0 1198144 1198307 + 2559 1198124 1198327	+	5	0	FASTA:44-66	CAAGAGATCAAAATCCGGTTCGG	63
BM_gRNA_263	BMgn000060|Gene015144.1	Bm_scaf98 14 164 1199182 1199350 + 2559 1199162 1199370	-	5	0	FASTA:69-91	AGTTGCAGATCGGCATGCACAGG	71
BM_gRNA_264	BMgn000061|Gene015147.1	Bm_scaf98 2 154 1237845 1238164 + 711 1237825 1238184 Warning:CutE1238401	+	6	0	FASTA:288-310	TGCACTGGGGTGGCTGGATTCGG	307
BM_gRNA_265	BMgn000061|Gene015147.1	Bm_scaf98 2 154 1237845 1238164 + 711 1237825 1238184 Warning:CutE1238401	-	5	0	FASTA:204-226	CTTTATAACCGATCTTGTTGGGG	206
BM_gRNA_266	BMgn000061|Gene015147.1	Bm_scaf98 2 154 1237845 1238164 + 711 1237825 1238184 Warning:CutE1238401	-	4	0	FASTA:44-66	GCATTGTGTAAGGGCGAAGCCGG	46
BM_gRNA_267	BMgn000061|Gene015147.1	Bm_scaf98 2 154 1237845 1238164 + 711 1237825 1238184 Warning:CutE1238401	-	4	0	FASTA:143-165	TTGGCTAGAAGTGAATTTTGAGG	145
BM_gRNA_268	BMgn000061|Gene015147.1	Bm_scaf98 2 154 1237845 1238164 + 711 1237825 1238184 Warning:CutE1238401	-	4	0	FASTA:162-184	AATGTCCAATATTTGTTTGTTGG	164
BM_gRNA_269	BMgn000062|Gene015149.0	Bm_scaf98 4 0 1243449 1243756 + 864 1243429 1243776	+	5	0	FASTA:213-235	ATACGTGTGGGCTACCTGGAAGG	232
BM_gRNA_270	BMgn000062|Gene015149.1	Bm_scaf98 4 308 1244121 1244340 + 864 1244101 1244360	-	6	0	FASTA:132-154	GTGGGGTGAGATTCTGCTCTTGG	134
BM_gRNA_271	BMgn000062|Gene015149.2	Bm_scaf98 4 528 1245811 1245858 + 864 1245791 1245878 Warning:CutE1245975	+	4	0	FASTA:36-58	GTGGAGCTGTGCGTGGTGGTGGG	55
BM_gRNA_272	BMgn000062|Gene015149.0	Bm_scaf98 4 0 1243449 1243756 + 864 1243429 1243776	-	5	0	FASTA:268-290	GAGCAAAGTGGTCGGCAAACTGG	270
BM_gRNA_273	BMgn000062|Gene015149.1	Bm_scaf98 4 308 1244121 1244340 + 864 1244101 1244360	-	5	0	FASTA:77-99	GATTTTATCTACACCATGTATGG	79
BM_gRNA_274	BMgn000063|Gene015151.0	Bm_scaf98 9 0 1297627 1297746 + 1086 1297607 1297766	+	5	0	FASTA:53-75	CAAAGAACTATGTCGACTTTTGG	72
BM_gRNA_275	BMgn000063|Gene015151.1	Bm_scaf98 9 120 1298899 1299112 + 1086 1298879 1299132	-	6	0	FASTA:71-93	TCTTCTGCCCCCAGCACTCCAGG	73
BM_gRNA_276	BMgn000063|Gene015151.2	Bm_scaf98 9 334 1299879 1299955 + 1086 1299859 1299975	-	6	0	FASTA:30-52	GGTGGCCCTCTGCGCGCCGCCGG	32
BM_gRNA_277	BMgn000063|Gene015151.0	Bm_scaf98 9 0 1297627 1297746 + 1086 1297607 1297766	+	5	0	FASTA:80-102	CTTCGATTACTGGGAGGAGCTGG	99
BM_gRNA_278	BMgn000063|Gene015151.1	Bm_scaf98 9 120 1298899 1299112 + 1086 1298879 1299132	+	6	0	FASTA:144-166	CCTGCCATGAGGCGGCTAACCGG	163
BM_gRNA_279	BMgn000064|Gene015152.2	Bm_scaf98 7 121 1317912 1318053 + 832 1317892 1318073	-	5	0	FASTA:21-43	TTTAGGAGCTCTTGTAGTGCTGG	23
BM_gRNA_280	BMgn000064|Gene015152.2	Bm_scaf98 7 121 1317912 1318053 + 832 1317892 1318073	-	5	0	FASTA:59-81	ACTGCTGTCGCACTGAAGTCTGG	61
BM_gRNA_281	BMgn000064|Gene015152.2	Bm_scaf98 7 121 1317912 1318053 + 832 1317892 1318073	-	4	0	FASTA:38-60	GGAGCAGGCTTCTGAACTTTAGG	40
BM_gRNA_282	BMgn000064|Gene015152.2	Bm_scaf98 7 121 1317912 1318053 + 832 1317892 1318073	+	5	0	FASTA:68-90	AGTGCGACAGCAGTTGTCAATGG	87
BM_gRNA_283	BMgn000064|Gene015152.2	Bm_scaf98 7 121 1317912 1318053 + 832 1317892 1318073	-	4	1	FASTA:53-75	GTCGCACTGAAGTCTGGAGCAGG	55
BM_gRNA_284	BMgn000065|Gene016587.1	Bm_scaf601_contig43931 10 394 2565 2674 + 2554 2545 2694	-	5	0	FASTA:76-98	ATTCGATTGAGTCTAACAAGCGG	78
BM_gRNA_285	BMgn000065|Gene016587.2	Bm_scaf601_contig43931 10 504 2861 3028 + 2554 2841 3048	+	5	0	FASTA:29-51	TGCGAATTCGTGAATCCCGGTGG	48
BM_gRNA_286	BMgn000065|Gene016587.1	Bm_scaf601_contig43931 10 394 2565 2674 + 2554 2545 2694	-	4	0	FASTA:100-122	CATTCCAAGCCATAGTCTTTTGG	102
BM_gRNA_287	BMgn000065|Gene016587.2	Bm_scaf601_contig43931 10 504 2861 3028 + 2554 2841 3048	+	5	0	FASTA:98-120	AAATCAGGAATTGCGAAATCGGG	117
BM_gRNA_288	BMgn000065|Gene016587.2	Bm_scaf601_contig43931 10 504 2861 3028 + 2554 2841 3048	+	5	0	FASTA:125-147	AGATTCATTGAACCGACATCAGG	144
BM_gRNA_289	BMgn000066|Gene016689.0	Bm_scaf1114_contig45323 3 0 1477 1663 + 499 1457 1683	+	4	0	FASTA:172-194	ATGACAAACTTAAGAGGAATTGG	191
BM_gRNA_290	BMgn000066|Gene016689.1	Bm_scaf1114_contig45323 3 187 2708 2817 + 499 2688 2837	+	7	0	FASTA:21-43	GTATTGACAACAGAGTCCGCAGG	40
BM_gRNA_291	BMgn000066|Gene016689.2	Bm_scaf1114_contig45323 3 297 4153 4187 + 499 4133 4207 Warning:CutE4354	-	5	0	FASTA:23-45	GCTCTTTAACATTGTGAACTAGG	25
BM_gRNA_292	BMgn000066|Gene016689.1	Bm_scaf1114_contig45323 3 187 2708 2817 + 499 2688 2837	-	6	0	FASTA:99-121	TCCATTTGGGAGCATATGACGGG	101
BM_gRNA_293	BMgn000066|Gene016689.1	Bm_scaf1114_contig45323 3 187 2708 2817 + 499 2688 2837	-	4	0	FASTA:69-91	GTTGGAACCGTAACCAATGTTGG	71
BM_gRNA_294	BMgn000067|Gene013916.1	Bm_scaf43 8 12 3422798 3422948 - 1194 3422778 3422968	-	6	0	FASTA:139-161	TAGTTCTCTGGTGGCGTGCATGG	141
BM_gRNA_295	BMgn000067|Gene013916.2	Bm_scaf43 8 163 3422584 3422695 - 1194 3422564 3422715	-	4	0	FASTA:23-45	GGTTCAACACGAACTATCGGCGG	25
BM_gRNA_296	BMgn000067|Gene013916.1	Bm_scaf43 8 12 3422798 3422948 - 1194 3422778 3422968	+	5	0	FASTA:110-132	TGAGGTCACCATCGAGACAAAGG	129
BM_gRNA_297	BMgn000067|Gene013916.2	Bm_scaf43 8 163 3422584 3422695 - 1194 3422564 3422715	-	4	0	FASTA:106-128	ATACGGCGCTTAGAGATGAAGGG	108
BM_gRNA_298	BMgn000067|Gene013916.1	Bm_scaf43 8 12 3422798 3422948 - 1194 3422778 3422968	-	4	0	FASTA:83-105	CAGCCTCGCAGTGAAACTTCTGG	85
BM_gRNA_299	BMgn000068|Gene013901.0	Bm_scaf43 3 0 2735610 2735730 - 1743 2735590 2735750	-	5	0	FASTA:44-66	GATATGTAGATTCCACCAGGAGG	46
BM_gRNA_300	BMgn000068|Gene013901.2	Bm_scaf43 3 252 2732161 2733070 - 1743 2732141 2733090 Warning:CutS2731580	-	6	0	FASTA:355-377	GATATTACGGGTGGAATCATCGG	357
BM_gRNA_301	BMgn000068|Gene013901.0	Bm_scaf43 3 0 2735610 2735730 - 1743 2735590 2735750	+	5	0	FASTA:80-102	TGCAACGACCATCATCACGATGG	99
BM_gRNA_302	BMgn000068|Gene013901.2	Bm_scaf43 3 252 2732161 2733070 - 1743 2732141 2733090 Warning:CutS2731580	+	6	0	FASTA:580-602	TAGCTGTAGGTGTCATCTTAAGG	599
BM_gRNA_303	BMgn000068|Gene013901.2	Bm_scaf43 3 252 2732161 2733070 - 1743 2732141 2733090 Warning:CutS2731580	-	6	0	FASTA:753-775	TCTTGCATGTCCTTGCCCACAGG	755
BM_gRNA_304	BMgn000069|Gene013897.0	Bm_scaf43 19 0 2581414 2581482 - 2292 2581394 2581502	+	5	0	FASTA:62-84	AAGCAGCGAATGCTCAGATTTGG	81
BM_gRNA_305	BMgn000069|Gene013897.1	Bm_scaf43 19 69 2579925 2580054 - 2292 2579905 2580074	-	5	0	FASTA:66-88	CTGCTCCTTGGCTTAGGTGGGGG	68
BM_gRNA_306	BMgn000069|Gene013897.2	Bm_scaf43 19 199 2578966 2579169 - 2292 2578946 2579189	-	6	0	FASTA:81-103	CGGAGGCGAGTCTCTGCTCTTGG	83
BM_gRNA_307	BMgn000069|Gene013897.0	Bm_scaf43 19 0 2581414 2581482 - 2292 2581394 2581502	-	4	0	FASTA:25-47	CAACGGTTTATTCTTTCTTTTGG	27
BM_gRNA_308	BMgn000069|Gene013897.1	Bm_scaf43 19 69 2579925 2580054 - 2292 2579905 2580074	-	4	0	FASTA:91-113	ACTGTCGGATGACTTCCCTGAGG	93
BM_gRNA_309	BMgn000070|Gene013895.0	Bm_scaf43 1 0 2540955 2541490 - 804 2540935 2541510 Warning:CutS2540687	-	7	0	FASTA:177-199	TATAGATCTCCCCAGGGTGTAGG	179
BM_gRNA_310	BMgn000070|Gene013895.0	Bm_scaf43 1 0 2540955 2541490 - 804 2540935 2541510 Warning:CutS2540687	-	4	0	FASTA:52-74	TATTACGTCAGAATTACATCCGG	54
BM_gRNA_311	BMgn000070|Gene013895.0	Bm_scaf43 1 0 2540955 2541490 - 804 2540935 2541510 Warning:CutS2540687	-	4	0	FASTA:101-123	TTTTAAGATTAGCATCGGTCAGG	103
BM_gRNA_312	BMgn000070|Gene013895.0	Bm_scaf43 1 0 2540955 2541490 - 804 2540935 2541510 Warning:CutS2540687	+	4	0	FASTA:217-239	AGGAAGTTGAGAGACATTTCCGG	236
BM_gRNA_313	BMgn000070|Gene013895.0	Bm_scaf43 1 0 2540955 2541490 - 804 2540935 2541510 Warning:CutS2540687	+	4	0	FASTA:355-377	AGAATTATGTTGCGTCAAAATGG	374
BM_gRNA_314	BMgn000071|Gene013893.1	Bm_scaf43 3 16 2535012 2535193 - 435 2534992 2535213	+	6	0	FASTA:157-179	GGCGCGTGCAGAACTGACCGTGG	176
BM_gRNA_315	BMgn000071|Gene013893.2	Bm_scaf43 3 198 2534787 2534878 - 435 2534767 2534898 Warning:CutS2534642	-	6	0	FASTA:83-105	TGTTCGGCGCCCAAAAATGATGG	85
BM_gRNA_316	BMgn000071|Gene013893.1	Bm_scaf43 3 16 2535012 2535193 - 435 2534992 2535213	+	5	0	FASTA:24-46	TAATACTCGCAACGCAAAATCGG	43
BM_gRNA_317	BMgn000071|Gene013893.2	Bm_scaf43 3 198 2534787 2534878 - 435 2534767 2534898 Warning:CutS2534642	+	5	0	FASTA:32-54	AGCTTATCTGTCTGGCGTTGTGG	51
BM_gRNA_318	BMgn000071|Gene013893.1	Bm_scaf43 3 16 2535012 2535193 - 435 2534992 2535213	+	5	0	FASTA:91-113	ATTCACGGTACCGATCACGCTGG	110
BM_gRNA_319	BMgn000072|Gene013890.1	Bm_scaf43 14 133 2459568 2459664 - 5830 2459548 2459684	-	4	0	FASTA:30-52	CGCTTCACACCCCGTGCCGCCGG	32
BM_gRNA_320	BMgn000072|Gene013890.2	Bm_scaf43 14 230 2458579 2458690 - 5830 2458559 2458710	-	5	0	FASTA:38-60	CCTCGCTTCTTTGGAGCAGTGGG	40
BM_gRNA_321	BMgn000072|Gene013890.1	Bm_scaf43 14 133 2459568 2459664 - 5830 2459548 2459684	-	4	0	FASTA:61-83	TGATGTCGTGGTCGATGATTTGG	63
BM_gRNA_322	BMgn000072|Gene013890.2	Bm_scaf43 14 230 2458579 2458690 - 5830 2458559 2458710	-	4	0	FASTA:94-116	CGTCTTCTCCAAGGCCGAGCTGG	96
BM_gRNA_323	BMgn000072|Gene013890.2	Bm_scaf43 14 230 2458579 2458690 - 5830 2458559 2458710	+	5	0	FASTA:62-84	CGTGTTCTGACATGTGGACAAGG	81
BM_gRNA_324	BMgn000073|Gene013888.1	Bm_scaf43 7 287 2396622 2396775 - 2649 2396602 2396795	-	6	0	FASTA:133-155	ATAGAAACGACATCTGCCTGTGG	135
BM_gRNA_325	BMgn000073|Gene013888.2	Bm_scaf43 7 441 2395336 2395876 - 2649 2395316 2395896	-	5	0	FASTA:25-47	TATTTGTCCTGGGAGTACCTTGG	27
BM_gRNA_326	BMgn000073|Gene013888.1	Bm_scaf43 7 287 2396622 2396775 - 2649 2396602 2396795	-	5	0	FASTA:52-74	AAGTCTTCGTGTACGAGTCCCGG	54
BM_gRNA_327	BMgn000073|Gene013888.2	Bm_scaf43 7 441 2395336 2395876 - 2649 2395316 2395896	-	5	0	FASTA:59-81	TTGCGGCGAGTTGGACACTTCGG	61
BM_gRNA_328	BMgn000073|Gene013888.1	Bm_scaf43 7 287 2396622 2396775 - 2649 2396602 2396795	-	5	0	FASTA:95-117	CTGTTCGGAGCGCACTGGTCCGG	97
BM_gRNA_329	BMgn000074|Gene013887.1	Bm_scaf43 8 166 2381027 2381197 - 3373 2381007 2381217	+	5	0	FASTA:23-45	TTTAATGGCGGTCGCGGAGGAGG	42
BM_gRNA_330	BMgn000074|Gene013887.2	Bm_scaf43 8 337 2380554 2380632 - 3373 2380534 2380652	-	6	0	FASTA:45-67	TTTGAAGCCTCCCCTGCTCGGGG	47
BM_gRNA_331	BMgn000074|Gene013887.1	Bm_scaf43 8 166 2381027 2381197 - 3373 2381007 2381217	+	5	0	FASTA:131-153	GGCAAGTTCGAGAAGAGAGGCGG	150
BM_gRNA_332	BMgn000074|Gene013887.2	Bm_scaf43 8 337 2380554 2380632 - 3373 2380534 2380652	+	4	0	FASTA:78-100	AAGTCATAATTGAACCACACAGG	97
BM_gRNA_333	BMgn000074|Gene013887.1	Bm_scaf43 8 166 2381027 2381197 - 3373 2381007 2381217	+	4	0	FASTA:47-69	GGCGGTCGCGGCGGTTTCCGTGG	66
BM_gRNA_334	BMgn000075|Gene013883.0	Bm_scaf43 2 0 2358531 2359738 - 1812 2358511 2359758 Warning:CutS2357965	+	7	0	FASTA:46-68	TTCCGAGCCCTGTGTCCGATGGG	65
BM_gRNA_335	BMgn000075|Gene013883.0	Bm_scaf43 2 0 2358531 2359738 - 1812 2358511 2359758 Warning:CutS2357965	-	6	0	FASTA:318-340	ATAGGTGGACGCTGGGCTGTGGG	320
BM_gRNA_336	BMgn000075|Gene013883.0	Bm_scaf43 2 0 2358531 2359738 - 1812 2358511 2359758 Warning:CutS2357965	+	6	0	FASTA:359-381	AAAGACCCAGGGTTACAACTCGG	378
BM_gRNA_337	BMgn000075|Gene013883.0	Bm_scaf43 2 0 2358531 2359738 - 1812 2358511 2359758 Warning:CutS2357965	+	6	0	FASTA:383-405	AGGTTACTTCTCATCAGACCAGG	402
BM_gRNA_338	BMgn000075|Gene013883.0	Bm_scaf43 2 0 2358531 2359738 - 1812 2358511 2359758 Warning:CutS2357965	-	6	0	FASTA:765-787	GGAGTGGGCACCCCATTGTCAGG	767
BM_gRNA_339	BMgn000076|Gene013882.0	Bm_scaf43 7 0 2318347 2319322 - 2049 2318327 2319342	-	7	0	FASTA:698-720	CGGCCGAGTCTAACCTGCCTCGG	700
BM_gRNA_340	BMgn000076|Gene013882.1	Bm_scaf43 7 976 2317361 2317535 - 2049 2317341 2317555	+	6	0	FASTA:117-139	TGAAGGCGGCCCAGGAAGGCAGG	136
BM_gRNA_341	BMgn000076|Gene013882.2	Bm_scaf43 7 1151 2316567 2316781 - 2049 2316547 2316801 Warning:CutS2316544	-	6	0	FASTA:81-103	ACTCCTCGGAGGTGTAGTCCAGG	83
BM_gRNA_342	BMgn000076|Gene013882.0	Bm_scaf43 7 0 2318347 2319322 - 2049 2318327 2319342	-	6	0	FASTA:54-76	GAGCGGCTAAGCTGCGAGATCGG	56
BM_gRNA_343	BMgn000076|Gene013882.1	Bm_scaf43 7 976 2317361 2317535 - 2049 2317341 2317555	-	5	0	FASTA:32-54	GATGAAGACCTGTGCTGGCTTGG	34
BM_gRNA_344	BMgn000077|Gene013879.0	Bm_scaf43 1 0 2245366 2245815 - 675 2245346 2245835 Warning:CutS2245141	+	5	0	FASTA:29-51	TGAAGCTGACAACACTGCACAGG	48
BM_gRNA_345	BMgn000077|Gene013879.0	Bm_scaf43 1 0 2245366 2245815 - 675 2245346 2245835 Warning:CutS2245141	-	4	0	FASTA:376-398	TAATAAAGACAGTGCCTTATCGG	378
BM_gRNA_346	BMgn000077|Gene013879.0	Bm_scaf43 1 0 2245366 2245815 - 675 2245346 2245835 Warning:CutS2245141	+	4	0	FASTA:259-281	ACACTGGAAATGAAGATGTAGGG	278
BM_gRNA_347	BMgn000077|Gene013879.0	Bm_scaf43 1 0 2245366 2245815 - 675 2245346 2245835 Warning:CutS2245141	-	2	0	FASTA:93-115	TCTGTAGTAGATGTTGAGAATGG	95
BM_gRNA_348	BMgn000077|Gene013879.0	Bm_scaf43 1 0 2245366 2245815 - 675 2245346 2245835 Warning:CutS2245141	-	2	1	FASTA:219-241	GTTGTAGCTTTTATTTCATCTGG	221
BM_gRNA_349	BMgn000078|Gene013877.0	Bm_scaf43 5 0 2218752 2218932 - 1839 2218732 2218952	-	7	0	FASTA:82-104	TTCCTGGTAGAACTCCCCGCCGG	84
BM_gRNA_350	BMgn000078|Gene013877.1	Bm_scaf43 5 181 2217079 2217186 - 1839 2217059 2217206	-	6	0	FASTA:39-61	GCGCCGATCAGTCTGGGATCTGG	41
BM_gRNA_351	BMgn000078|Gene013877.2	Bm_scaf43 5 289 2216635 2216735 - 1839 2216615 2216755	+	6	0	FASTA:28-50	ATCGAACGAAGAACGCTCGTGGG	47
BM_gRNA_352	BMgn000078|Gene013877.0	Bm_scaf43 5 0 2218752 2218932 - 1839 2218732 2218952	-	6	0	FASTA:111-133	AACAGCTCCTGTTCCCCCCCGGG	113
BM_gRNA_353	BMgn000078|Gene013877.1	Bm_scaf43 5 181 2217079 2217186 - 1839 2217059 2217206	-	5	0	FASTA:69-91	GCTCTGCATGGTCCTAGCGAAGG	71
BM_gRNA_354	BMgn000079|Gene013874.0	Bm_scaf43 1 0 2146483 2146822 - 510 2146463 2146842 Warning:CutS2146313	-	6	0	FASTA:135-157	TCTTGGACGCTGGTTATCGAAGG	137
BM_gRNA_355	BMgn000079|Gene013874.0	Bm_scaf43 1 0 2146483 2146822 - 510 2146463 2146842 Warning:CutS2146313	+	6	0	FASTA:197-219	TTCCGATTGCGAGCTCCGTAGGG	216
BM_gRNA_356	BMgn000079|Gene013874.0	Bm_scaf43 1 0 2146483 2146822 - 510 2146463 2146842 Warning:CutS2146313	-	6	0	FASTA:257-279	TGCCATCGCAGGGTCCATGGTGG	259
BM_gRNA_357	BMgn000079|Gene013874.0	Bm_scaf43 1 0 2146483 2146822 - 510 2146463 2146842 Warning:CutS2146313	-	5	0	FASTA:48-70	TCCTCTAAATCACCGAGATCCGG	50
BM_gRNA_358	BMgn000079|Gene013874.0	Bm_scaf43 1 0 2146483 2146822 - 510 2146463 2146842 Warning:CutS2146313	-	5	0	FASTA:86-108	TCTCCTGTTCCAGTTGAGTTTGG	88
BM_gRNA_359	BMgn000080|Gene013873.0	Bm_scaf43 9 0 2135449 2135553 - 1017 2135429 2135573	+	6	0	FASTA:62-84	CAGCTCGTCCGGCCTGTCCAAGG	81
BM_gRNA_360	BMgn000080|Gene013873.1	Bm_scaf43 9 105 2134226 2134381 - 1017 2134206 2134401	-	6	0	FASTA:62-84	GGTGAAACGTGGCGGTCGCCTGG	64
BM_gRNA_361	BMgn000080|Gene013873.2	Bm_scaf43 9 261 2132924 2133042 - 1017 2132904 2133062	-	6	0	FASTA:60-82	GGCGGGTTTAGGGCCTGAGGGGG	62
BM_gRNA_362	BMgn000080|Gene013873.0	Bm_scaf43 9 0 2135449 2135553 - 1017 2135429 2135573	+	6	0	FASTA:104-126	CCAGCACAATACCTTCAGGGTGG	123
BM_gRNA_363	BMgn000080|Gene013873.1	Bm_scaf43 9 105 2134226 2134381 - 1017 2134206 2134401	-	6	0	FASTA:124-146	GCTATCCGCGTCCTCTCTACAGG	126
BM_gRNA_364	BMgn000081|Gene013869.0	Bm_scaf43 1 0 2010148 2010387 - 360 2010128 2010407 Warning:CutS2010028	-	5	0	FASTA:51-73	ATTCTAGTTACAACTGTGAGTGG	53
BM_gRNA_365	BMgn000081|Gene013869.0	Bm_scaf43 1 0 2010148 2010387 - 360 2010128 2010407 Warning:CutS2010028	-	5	0	FASTA:128-150	AAACTGAAGCCGCCTTAGCGAGG	130
BM_gRNA_366	BMgn000081|Gene013869.0	Bm_scaf43 1 0 2010148 2010387 - 360 2010128 2010407 Warning:CutS2010028	+	5	0	FASTA:195-217	AAAAAAAGGAAGGCTCTCACTGG	214
BM_gRNA_367	BMgn000081|Gene013869.0	Bm_scaf43 1 0 2010148 2010387 - 360 2010128 2010407 Warning:CutS2010028	-	4	0	FASTA:90-112	TTTGATATCGATACGCCACTGGG	92
BM_gRNA_368	BMgn000081|Gene013869.0	Bm_scaf43 1 0 2010148 2010387 - 360 2010128 2010407 Warning:CutS2010028	+	4	0	FASTA:105-127	ATATCAAAAGAGGCGCGAACTGG	124
BM_gRNA_369	BMgn000082|Gene013864.0	Bm_scaf43 12 0 1777862 1777998 - 2407 1777842 1778018	+	6	0	FASTA:134-156	ATCGTTTGCGACAACGGTACCGG	153
BM_gRNA_370	BMgn000082|Gene013864.1	Bm_scaf43 12 137 1777667 1777777 - 2407 1777647 1777797	+	6	0	FASTA:64-86	TATTCCCTTCCATGGTCGGCAGG	83
BM_gRNA_371	BMgn000082|Gene013864.2	Bm_scaf43 12 248 1774736 1774807 - 2407 1774716 1774827	+	5	0	FASTA:70-92	TTAGCTACCCTATGGAGAATGGG	89
BM_gRNA_372	BMgn000082|Gene013864.1	Bm_scaf43 12 137 1777667 1777777 - 2407 1777647 1777797	+	5	0	FASTA:35-57	CTTCGCTGGTAGCAATTTTCCGG	54
BM_gRNA_373	BMgn000082|Gene013864.2	Bm_scaf43 12 248 1774736 1774807 - 2407 1774716 1774827	-	4	0	FASTA:46-68	TTCAAGCATGGATCGCAGTTTGG	48
BM_gRNA_374	BMgn000083|Gene013861.0	Bm_scaf43 3 0 1700314 1700373 - 3249 1700294 1700393	-	6	0	FASTA:34-56	TCCCGCAGTAGAGGAGTCCTCGG	36
BM_gRNA_375	BMgn000083|Gene013861.1	Bm_scaf43 3 60 1698955 1699113 - 3249 1698935 1699133	+	5	0	FASTA:69-91	GCAGACGACACCGGCTATCACGG	88
BM_gRNA_376	BMgn000083|Gene013861.2	Bm_scaf43 3 219 1695504 1697450 - 3249 1695484 1697470 Warning:CutS1694421	-	6	0	FASTA:525-547	TCGTTTCTAGCGTTAGGTCTGGG	527
BM_gRNA_377	BMgn000083|Gene013861.1	Bm_scaf43 3 60 1698955 1699113 - 3249 1698935 1699133	-	5	0	FASTA:94-116	GTCGCTCGCGTTCAACGCCGCGG	96
BM_gRNA_378	BMgn000083|Gene013861.2	Bm_scaf43 3 219 1695504 1697450 - 3249 1695484 1697470 Warning:CutS1694421	+	6	0	FASTA:1083-1105	GATGTAACACCAAGACCGATTGG	1102
BM_gRNA_379	BMgn000084|Gene013859.0	Bm_scaf43 13 0 1456205 1456331 - 1791 1456185 1456351	-	5	0	FASTA:36-58	GTGTGAGAATATTGGGACGCAGG	38
BM_gRNA_380	BMgn000084|Gene013859.1	Bm_scaf43 13 127 1455732 1455961 - 1791 1455712 1455981	+	6	0	FASTA:97-119	AGCAGAGATGCACCATAGGATGG	116
BM_gRNA_381	BMgn000084|Gene013859.2	Bm_scaf43 13 357 1455535 1455642 - 1791 1455515 1455662	-	4	0	FASTA:63-85	TCGCATCTTTCTATATGACGAGG	65
BM_gRNA_382	BMgn000084|Gene013859.0	Bm_scaf43 13 0 1456205 1456331 - 1791 1456185 1456351	-	5	0	FASTA:64-86	ATTCGTAGCCTTTATAGGCTGGG	66
BM_gRNA_383	BMgn000084|Gene013859.1	Bm_scaf43 13 127 1455732 1455961 - 1791 1455712 1455981	+	5	0	FASTA:135-157	TACATCGTCTGGTGAGGCAATGG	154
BM_gRNA_384	BMgn000085|Gene013856.0	Bm_scaf43 3 0 1424189 1425094 - 2649 1424169 1425114	+	6	0	FASTA:764-786	CAGTGACGCAGTCAAACTGGAGG	783
BM_gRNA_385	BMgn000085|Gene013856.1	Bm_scaf43 3 906 1422485 1423344 - 2649 1422465 1423364 Warning:CutS1421617	+	6	0	FASTA:628-650	GCGGCGACGTTTTCCGGCGCAGG	647
BM_gRNA_386	BMgn000085|Gene013856.0	Bm_scaf43 3 0 1424189 1425094 - 2649 1424169 1425114	+	6	0	FASTA:830-852	TGACAGCATGGACAGCAATGAGG	849
BM_gRNA_387	BMgn000085|Gene013856.1	Bm_scaf43 3 906 1422485 1423344 - 2649 1422465 1423364 Warning:CutS1421617	-	6	0	FASTA:690-712	CACTTGACGTGACTCACGTCGGG	692
BM_gRNA_388	BMgn000085|Gene013856.0	Bm_scaf43 3 0 1424189 1425094 - 2649 1424169 1425114	+	5	0	FASTA:341-363	AGTCACTGACGGTCCAGAAACGG	360
BM_gRNA_389	BMgn000086|Gene013854.0	Bm_scaf43 4 0 1388383 1388721 - 858 1388363 1388741	-	5	0	FASTA:253-275	AAACTCCTTCAAATCGTCTGTGG	255
BM_gRNA_390	BMgn000086|Gene013854.1	Bm_scaf43 4 339 1387506 1387598 - 858 1387486 1387618	+	5	0	FASTA:45-67	AATTCAAGACTAAAGGCTGGAGG	64
BM_gRNA_391	BMgn000086|Gene013854.2	Bm_scaf43 4 432 1387070 1387145 - 858 1387050 1387165	-	4	0	FASTA:48-70	GTAACTTTGGCATCTCCTGTTGG	50
BM_gRNA_392	BMgn000086|Gene013854.0	Bm_scaf43 4 0 1388383 1388721 - 858 1388363 1388741	+	4	0	FASTA:184-206	ATTTAGAGAATGTTGATCCTTGG	203
BM_gRNA_393	BMgn000086|Gene013854.1	Bm_scaf43 4 339 1387506 1387598 - 858 1387486 1387618	-	5	0	FASTA:82-104	GGGACCTGCAGCCCGGTGTATGG	84
BM_gRNA_394	BMgn000087|Gene013853.0	Bm_scaf43 4 0 1382044 1382501 - 2291 1382024 1382521	+	6	0	FASTA:287-309	GATGTCCAGCCGTCGCGCGAAGG	306
BM_gRNA_395	BMgn000087|Gene013853.1	Bm_scaf43 4 458 1381302 1381560 - 2291 1381282 1381580	-	5	0	FASTA:54-76	TCGAGAGTCGGCCATCGATCTGG	56
BM_gRNA_396	BMgn000087|Gene013853.2	Bm_scaf43 4 717 1380163 1380972 - 2291 1380143 1380992 Warning:CutS1379850	-	5	0	FASTA:57-79	CTTGGTTCCCGTATTCAGGTTGG	59
BM_gRNA_397	BMgn000087|Gene013853.0	Bm_scaf43 4 0 1382044 1382501 - 2291 1382024 1382521	+	5	0	FASTA:262-284	TAACGTACGATTAGTGCGTATGG	281
BM_gRNA_398	BMgn000087|Gene013853.1	Bm_scaf43 4 458 1381302 1381560 - 2291 1381282 1381580	-	5	0	FASTA:84-106	GCTGGTTTTATGACACCTCCAGG	86
BM_gRNA_399	BMgn000088|Gene013851.3	Bm_scaf43 8 423 1366628 1366745 - 1924 1366608 1366765	-	6	0	FASTA:66-88	CTTCCACCACGTCCGACATGAGG	68
BM_gRNA_400	BMgn000088|Gene013851.3	Bm_scaf43 8 423 1366628 1366745 - 1924 1366608 1366765	-	4	0	FASTA:98-120	CGTGAACAAATCGACTTGGATGG	100
BM_gRNA_401	BMgn000088|Gene013851.3	Bm_scaf43 8 423 1366628 1366745 - 1924 1366608 1366765	+	4	0	FASTA:60-82	GCCTCTCCTCATGTCGGACGTGG	79
BM_gRNA_402	BMgn000088|Gene013851.3	Bm_scaf43 8 423 1366628 1366745 - 1924 1366608 1366765	-	4	0	FASTA:102-124	ATTCCGTGAACAAATCGACTTGG	104
BM_gRNA_403	BMgn000088|Gene013851.3	Bm_scaf43 8 423 1366628 1366745 - 1924 1366608 1366765	+	5	0	FASTA:63-85	TCTCCTCATGTCGGACGTGGTGG	82
BM_gRNA_404	BMgn000089|Gene013849.1	Bm_scaf43 10 70 1336136 1336405 - 1836 1336116 1336425	+	7	0	FASTA:136-158	CAAGGCTTACCCTCGACCTGAGG	155
BM_gRNA_405	BMgn000089|Gene013849.2	Bm_scaf43 10 340 1335382 1335539 - 1836 1335362 1335559	-	5	0	FASTA:51-73	GTCATCTGGCAATTCTATGTCGG	53
BM_gRNA_406	BMgn000089|Gene013849.1	Bm_scaf43 10 70 1336136 1336405 - 1836 1336116 1336425	-	6	0	FASTA:103-125	CGGAGACTGGCTGGTATGGTCGG	105
BM_gRNA_407	BMgn000089|Gene013849.2	Bm_scaf43 10 340 1335382 1335539 - 1836 1335362 1335559	-	5	0	FASTA:123-145	ACTGTTGTATCCGTATAGATAGG	125
BM_gRNA_408	BMgn000089|Gene013849.1	Bm_scaf43 10 70 1336136 1336405 - 1836 1336116 1336425	-	6	0	FASTA:257-279	TTCGCAATGAACTCTGGATTAGG	259
BM_gRNA_409	BMgn000090|Gene013846.0	Bm_scaf43 5 0 1249872 1250000 - 828 1249852 1250020	+	7	0	FASTA:73-95	TGGACAGCCAGGCTTCCACCAGG	92
BM_gRNA_410	BMgn000090|Gene013846.1	Bm_scaf43 5 129 1248443 1248574 - 828 1248423 1248594	-	5	0	FASTA:65-87	AAGTCTCCCCTCCACCACCTTGG	67
BM_gRNA_411	BMgn000090|Gene013846.2	Bm_scaf43 5 261 1247740 1247856 - 828 1247720 1247876	+	6	0	FASTA:40-62	CGAACAACGCTAACGTCGGAGGG	59
BM_gRNA_412	BMgn000090|Gene013846.0	Bm_scaf43 5 0 1249872 1250000 - 828 1249852 1250020	+	5	0	FASTA:117-139	AGCAAGACTACAATAGCGCCTGG	136
BM_gRNA_413	BMgn000090|Gene013846.1	Bm_scaf43 5 129 1248443 1248574 - 828 1248423 1248594	+	5	0	FASTA:95-117	TCTGACTGTCGATGCTCTCCTGG	114
BM_gRNA_414	BMgn000091|Gene013845.1	Bm_scaf43 2 366 1198844 1198876 - 599 1198824 1198896 Warning:CutS1198644	-	5	0	FASTA:34-56	TGTGGCCCCGCGTACTGCGCCGG	36
BM_gRNA_415	BMgn000091|Gene013845.1	Bm_scaf43 2 366 1198844 1198876 - 599 1198824 1198896 Warning:CutS1198644	+	4	0	FASTA:27-49	GCTGGTGCCGGCGCAGTACGCGG	46
BM_gRNA_416	BMgn000091|Gene013845.1	Bm_scaf43 2 366 1198844 1198876 - 599 1198824 1198896 Warning:CutS1198644	+	4	0	FASTA:29-51	TGGTGCCGGCGCAGTACGCGGGG	48
BM_gRNA_417	BMgn000091|Gene013845.0	Bm_scaf43 2 0 1202087 1202452 - 599 1202067 1202472	-	5	0	FASTA:164-186	AGTCGTAAGCGAGTGAGCTTTGG	166
BM_gRNA_418	BMgn000091|Gene013845.0	Bm_scaf43 2 0 1202087 1202452 - 599 1202067 1202472	-	5	0	FASTA:252-274	GCCACTTGCTATTCGAGTCAAGG	254
BM_gRNA_419	BMgn000092|Gene013844.0	Bm_scaf43 1 0 1192200 1193055 - 1284 1192180 1193075 Warning:CutS1191772	+	8	0	FASTA:143-165	AAGAAACAACGAGGCGGACTTGG	162
BM_gRNA_420	BMgn000092|Gene013844.0	Bm_scaf43 1 0 1192200 1193055 - 1284 1192180 1193075 Warning:CutS1191772	+	7	0	FASTA:84-106	GACGATTCCCTGAACAACCTCGG	103
BM_gRNA_421	BMgn000092|Gene013844.0	Bm_scaf43 1 0 1192200 1193055 - 1284 1192180 1193075 Warning:CutS1191772	+	6	0	FASTA:258-280	GGATGGGAGACCACCTCCTTAGG	277
BM_gRNA_422	BMgn000092|Gene013844.0	Bm_scaf43 1 0 1192200 1193055 - 1284 1192180 1193075 Warning:CutS1191772	-	6	0	FASTA:341-363	TACATTCATCGCATAAGGGATGG	343
BM_gRNA_423	BMgn000092|Gene013844.0	Bm_scaf43 1 0 1192200 1193055 - 1284 1192180 1193075 Warning:CutS1191772	+	6	0	FASTA:574-596	AGGAAATAGAGATTCAGGAGAGG	593
BM_gRNA_424	BMgn000093|Gene013842.0	Bm_scaf43 4 0 859011 859204 - 1211 858991 859224	+	6	0	FASTA:193-215	GCTATGCTGAGCCTATGTACGGG	212
BM_gRNA_425	BMgn000093|Gene013842.1	Bm_scaf43 4 194 856610 856847 - 1211 856590 856867	+	6	0	FASTA:54-76	AGTTGCCAACACCCTGATCGTGG	73
BM_gRNA_426	BMgn000093|Gene013842.0	Bm_scaf43 4 0 859011 859204 - 1211 858991 859224	-	4	0	FASTA:100-122	GAAGTTCGTGTAATCGAAGTAGG	102
BM_gRNA_427	BMgn000093|Gene013842.1	Bm_scaf43 4 194 856610 856847 - 1211 856590 856867	-	6	0	FASTA:220-242	CAAGCTTGGCAGGCTCTGACGGG	222
BM_gRNA_428	BMgn000093|Gene013842.1	Bm_scaf43 4 194 856610 856847 - 1211 856590 856867	-	5	0	FASTA:31-53	GTCGTTGTAGCTAGCAGAAACGG	33
BM_gRNA_429	BMgn000095|Gene013840.0	Bm_scaf43 18 0 748915 749187 - 4459 748895 749207	+	6	0	FASTA:96-118	CTTGCTATGGCAGGCCAAAATGG	115
BM_gRNA_430	BMgn000095|Gene013840.1	Bm_scaf43 18 273 726166 726342 - 4459 726146 726362	-	6	0	FASTA:36-58	GTAGCCGGACCGAATGATGACGG	38
BM_gRNA_431	BMgn000095|Gene013840.2	Bm_scaf43 18 450 723943 724061 - 4459 723923 724081	-	5	0	FASTA:36-58	TAGCCTTCGACGAAAAGTTGAGG	38
BM_gRNA_432	BMgn000095|Gene013840.0	Bm_scaf43 18 0 748915 749187 - 4459 748895 749207	+	6	0	FASTA:125-147	GAATTTTGGCGCCCTTATACAGG	144
BM_gRNA_433	BMgn000095|Gene013840.1	Bm_scaf43 18 273 726166 726342 - 4459 726146 726362	+	6	0	FASTA:116-138	AGACCCCGAGTTTCCGGCCGTGG	135
BM_gRNA_434	BMgn000098|Gene013837.0	Bm_scaf43 4 0 672654 672698 - 900 672634 672718	+	4	0	FASTA:44-66	CAAAATAACTGAAACCCCAATGG	63
BM_gRNA_435	BMgn000098|Gene013837.1	Bm_scaf43 4 45 670344 670698 - 900 670324 670718	-	6	0	FASTA:237-259	TTGAAGACAGCACATCCCCTAGG	239
BM_gRNA_436	BMgn000098|Gene013837.2	Bm_scaf43 4 400 667947 668038 - 900 667927 668058	-	4	0	FASTA:44-66	CTGTACTGTTGCATTTGGTTTGG	46
BM_gRNA_437	BMgn000098|Gene013837.1	Bm_scaf43 4 45 670344 670698 - 900 670324 670718	-	6	0	FASTA:282-304	ATCAAATGGTCATTCGCCGCAGG	284
BM_gRNA_438	BMgn000098|Gene013837.2	Bm_scaf43 4 400 667947 668038 - 900 667927 668058	+	4	0	FASTA:91-113	TTTTACACCCCAGCAAATAAGGG	110
BM_gRNA_439	BMgn000099|Gene013836.1	Bm_scaf43 3 154 654723 654866 - 549 654703 654886	+	5	0	FASTA:125-147	CCTCTTAGCGTTGACAGTGGAGG	144
BM_gRNA_440	BMgn000099|Gene013836.0	Bm_scaf43 3 0 655555 655708 - 549 655535 655728	-	3	0	FASTA:138-160	CCAGATGTAACTTGAGATTTTGG	140
BM_gRNA_441	BMgn000099|Gene013836.1	Bm_scaf43 3 154 654723 654866 - 549 654703 654886	+	4	0	FASTA:31-53	AGGTGATGAGGAATTGATGATGG	50
BM_gRNA_442	BMgn000099|Gene013836.1	Bm_scaf43 3 154 654723 654866 - 549 654703 654886	-	2	0	FASTA:113-135	ACGCTAAGAGGGTGCTTCGATGG	115
BM_gRNA_443	BMgn000099|Gene013836.1	Bm_scaf43 3 154 654723 654866 - 549 654703 654886	+	2	0	FASTA:122-144	CACCCTCTTAGCGTTGACAGTGG	141
BM_gRNA_444	BMgn000100|Gene013835.1	Bm_scaf43 15 331 613937 614149 - 4668 613917 614169	+	4	0	FASTA:104-126	CAATGCTTGTAAGACAATCAGGG	123
BM_gRNA_445	BMgn000100|Gene013835.2	Bm_scaf43 15 544 612087 612308 - 4668 612067 612328	-	7	0	FASTA:164-186	TATCATAGTTACCAGGGCCCTGG	166
BM_gRNA_446	BMgn000100|Gene013835.1	Bm_scaf43 15 331 613937 614149 - 4668 613917 614169	-	4	0	FASTA:155-177	CATTGAGGCACTTTATAACACGG	157
BM_gRNA_447	BMgn000100|Gene013835.2	Bm_scaf43 15 544 612087 612308 - 4668 612067 612328	+	5	0	FASTA:193-215	CTTATGGTTCACAGGGACATTGG	212
BM_gRNA_448	BMgn000100|Gene013835.2	Bm_scaf43 15 544 612087 612308 - 4668 612067 612328	-	4	0	FASTA:65-87	AATTGTGATAGTTTGTCGGTTGG	67
BM_gRNA_449	BMgn000102|Gene013834.0	Bm_scaf43 8 0 581958 582055 - 3103 581938 582075	+	4	0	FASTA:22-44	TCAGCATATAGATTTGGAGTTGG	41
BM_gRNA_450	BMgn000102|Gene013834.1	Bm_scaf43 8 98 579861 580665 - 3103 579841 580685	-	7	0	FASTA:278-300	GTTGGCGCTTAGAAGACCCTTGG	280
BM_gRNA_451	BMgn000102|Gene013834.2	Bm_scaf43 8 903 579036 579109 - 3103 579016 579129	-	4	0	FASTA:26-48	TTCTTTTCTAAGAAAGCTTCTGG	28
BM_gRNA_452	BMgn000102|Gene013834.0	Bm_scaf43 8 0 581958 582055 - 3103 581938 582075	+	4	0	FASTA:64-86	TGAGATGATAGAGCAGCAACAGG	83
BM_gRNA_453	BMgn000102|Gene013834.1	Bm_scaf43 8 98 579861 580665 - 3103 579841 580685	+	7	0	FASTA:716-738	GTACCGTAAGCGGTACCCCGAGG	735
BM_gRNA_454	BMgn000103|Gene013832.0	Bm_scaf43 28 0 566142 566440 - 6157 566122 566460	-	5	0	FASTA:196-218	TACACCACCTTCATTTTAGCAGG	198
BM_gRNA_455	BMgn000103|Gene013832.1	Bm_scaf43 28 299 563085 563215 - 6157 563065 563235	+	4	0	FASTA:53-75	ACTGAAGAGACTGATGATCCAGG	72
BM_gRNA_456	BMgn000103|Gene013832.2	Bm_scaf43 28 430 560952 561088 - 6157 560932 561108	-	6	0	FASTA:29-51	CTTCCGGAATGGGCTCAGGTGGG	31
BM_gRNA_457	BMgn000103|Gene013832.0	Bm_scaf43 28 0 566142 566440 - 6157 566122 566460	-	5	0	FASTA:227-249	TAACCCGAGAGCACCCAACTCGG	229
BM_gRNA_458	BMgn000103|Gene013832.1	Bm_scaf43 28 299 563085 563215 - 6157 563065 563235	-	4	0	FASTA:102-124	AGTAGACGAGGAACGTCGAGTGG	104
BM_gRNA_459	BMgn000104|Gene013830.1	Bm_scaf43 15 91 497399 497438 - 1740 497379 497458	+	4	0	FASTA:33-55	GCTACAGTTTGTACGAAGTCAGG	52
BM_gRNA_460	BMgn000104|Gene013830.2	Bm_scaf43 15 131 497164 497284 - 1740 497144 497304	-	5	0	FASTA:31-53	TTGTCATTTCGACGAACTGGCGG	33
BM_gRNA_461	BMgn000104|Gene013830.2	Bm_scaf43 15 131 497164 497284 - 1740 497144 497304	+	5	0	FASTA:55-77	AGCTCGCATCGAAGGTCTACTGG	74
BM_gRNA_462	BMgn000104|Gene013830.3	Bm_scaf43 15 252 496680 496782 - 1740 496660 496802	+	5	0	FASTA:102-124	ATTGAGACTCTTCAGCAGAGTGG	121
BM_gRNA_463	BMgn000104|Gene013830.2	Bm_scaf43 15 131 497164 497284 - 1740 497144 497304	-	4	0	FASTA:81-103	TCCTGTCATTAGTTTAGGGAAGG	83
BM_gRNA_464	BMgn000105|Gene013829.0	Bm_scaf43 1 0 476349 476576 - 342 476329 476596 Warning:CutS476235	-	5	0	FASTA:78-100	AGATCGCAGGAATGGTAACAGGG	80
BM_gRNA_465	BMgn000105|Gene013829.0	Bm_scaf43 1 0 476349 476576 - 342 476329 476596 Warning:CutS476235	+	5	0	FASTA:135-157	AACTATCATGGCGTCGAAGGGGG	154
BM_gRNA_466	BMgn000105|Gene013829.0	Bm_scaf43 1 0 476349 476576 - 342 476329 476596 Warning:CutS476235	-	5	0	FASTA:199-221	AGGATAATACGCTCCCCATGTGG	201
BM_gRNA_467	BMgn000105|Gene013829.0	Bm_scaf43 1 0 476349 476576 - 342 476329 476596 Warning:CutS476235	-	4	0	FASTA:234-256	TTCGCCACAGAGTATCCGACCGG	236
BM_gRNA_468	BMgn000105|Gene013829.0	Bm_scaf43 1 0 476349 476576 - 342 476329 476596 Warning:CutS476235	+	4	0	FASTA:215-237	TTATCCTAAATACGAATTACCGG	234
BM_gRNA_469	BMgn000106|Gene013827.2	Bm_scaf43 4 314 471282 471459 - 1757 471262 471479	-	5	0	FASTA:77-99	GCACCAATTGCAGCTTTGCAGGG	79
BM_gRNA_470	BMgn000106|Gene013827.2	Bm_scaf43 4 314 471282 471459 - 1757 471262 471479	+	5	0	FASTA:122-144	GTCCGACATGTACAACCGCTTGG	141
BM_gRNA_471	BMgn000106|Gene013827.2	Bm_scaf43 4 314 471282 471459 - 1757 471262 471479	+	4	0	FASTA:139-161	GCTTGGTGAGCGCATGTCACCGG	158
BM_gRNA_472	BMgn000106|Gene013827.2	Bm_scaf43 4 314 471282 471459 - 1757 471262 471479	-	4	0	FASTA:66-88	AGCTTTGCAGGGTCTAGCTGCGG	68
BM_gRNA_473	BMgn000106|Gene013827.2	Bm_scaf43 4 314 471282 471459 - 1757 471262 471479	+	5	0	FASTA:74-96	AGACCCTGCAAAGCTGCAATTGG	93
BM_gRNA_474	BMgn000107|Gene013824.0	Bm_scaf43 4 0 454289 454528 - 1845 454269 454548	-	5	0	FASTA:214-236	GCGGATCCTTGCGCCTTTGCTGG	216
BM_gRNA_475	BMgn000107|Gene013824.1	Bm_scaf43 4 240 453170 453273 - 1845 453150 453293	+	7	0	FASTA:47-69	TCGAGGTCTCGTACCCTCGGTGG	66
BM_gRNA_476	BMgn000107|Gene013824.2	Bm_scaf43 4 344 451694 451798 - 1845 451674 451818	+	5	0	FASTA:23-45	TCAACTCGGCGAAGAGTTGCTGG	42
BM_gRNA_477	BMgn000107|Gene013824.0	Bm_scaf43 4 0 454289 454528 - 1845 454269 454548	+	4	0	FASTA:137-159	GAAATCACAAGAACAACGTTAGG	156
BM_gRNA_478	BMgn000107|Gene013824.1	Bm_scaf43 4 240 453170 453273 - 1845 453150 453293	-	5	0	FASTA:77-99	GCTTCATGATCGTTCATGTCTGG	79
BM_gRNA_479	BMgn000108|Gene013821.1	Bm_scaf43 2 7 343379 344213 - 1263 343359 344233 Warning:CutS342958	-	6	0	FASTA:92-114	GCTGTTTCCGAATTAACCTCTGG	94
BM_gRNA_480	BMgn000108|Gene013821.1	Bm_scaf43 2 7 343379 344213 - 1263 343359 344233 Warning:CutS342958	-	6	0	FASTA:134-156	TCTGGTTCTGATTCTACCGGTGG	136
BM_gRNA_481	BMgn000108|Gene013821.1	Bm_scaf43 2 7 343379 344213 - 1263 343359 344233 Warning:CutS342958	+	6	0	FASTA:393-415	GTTTGTCGCCGAACGTGAAAAGG	412
BM_gRNA_482	BMgn000108|Gene013821.1	Bm_scaf43 2 7 343379 344213 - 1263 343359 344233 Warning:CutS342958	-	6	0	FASTA:429-451	TTTCAAAGCGCTAGCCTCCGTGG	431
BM_gRNA_483	BMgn000108|Gene013821.1	Bm_scaf43 2 7 343379 344213 - 1263 343359 344233 Warning:CutS342958	+	6	0	FASTA:493-515	GCTTAGGTCTAATATACCCCTGG	512
BM_gRNA_484	BMgn000109|Gene013820.0	Bm_scaf43 7 0 303874 304020 - 5031 303854 304040	-	6	0	FASTA:43-65	CCTCGCGCTCTGAGGCTTCGAGG	45
BM_gRNA_485	BMgn000109|Gene013820.1	Bm_scaf43 7 147 302508 302624 - 5031 302488 302644	-	5	0	FASTA:43-65	TAAGGCGTATTCCGTCTCGCTGG	45
BM_gRNA_486	BMgn000109|Gene013820.2	Bm_scaf43 7 264 301765 301844 - 5031 301745 301864	+	5	0	FASTA:30-52	TCGCTTTTATACGGCTGGAGCGG	49
BM_gRNA_487	BMgn000109|Gene013820.0	Bm_scaf43 7 0 303874 304020 - 5031 303854 304040	-	6	0	FASTA:129-151	TACTTCAGTATCCTCTGCACCGG	131
BM_gRNA_488	BMgn000109|Gene013820.1	Bm_scaf43 7 147 302508 302624 - 5031 302488 302644	+	5	0	FASTA:88-110	AACACATTGACGATATGAAGAGG	107
BM_gRNA_489	BMgn000110|Gene013819.0	Bm_scaf43 13 0 282569 282673 - 2274 282549 282693	+	4	0	FASTA:22-44	TGAATGATTATGGATTGAAACGG	41
BM_gRNA_490	BMgn000110|Gene013819.1	Bm_scaf43 13 105 280826 281009 - 2274 280806 281029	-	6	0	FASTA:67-89	TTTCTTGTCCAGATCCCCATCGG	69
BM_gRNA_491	BMgn000110|Gene013819.2	Bm_scaf43 13 289 279237 279352 - 2274 279217 279372	-	5	0	FASTA:54-76	ATTGATGACGTCAGGGTTCGCGG	56
BM_gRNA_492	BMgn000110|Gene013819.0	Bm_scaf43 13 0 282569 282673 - 2274 282549 282693	-	4	0	FASTA:48-70	TAAGCCAGCTCCGTATAATCCGG	50
BM_gRNA_493	BMgn000110|Gene013819.1	Bm_scaf43 13 105 280826 281009 - 2274 280806 281029	-	5	0	FASTA:126-148	TTGGCGGTAAGTCTCGGCTTCGG	128
BM_gRNA_494	BMgn000111|Gene013818.0	Bm_scaf43 2 0 263373 263667 - 918 263353 263687	-	7	0	FASTA:91-113	GTGGGGGTATCCGCTCAGCGGGG	93
BM_gRNA_495	BMgn000111|Gene013818.1	Bm_scaf43 2 295 260997 261313 - 918 260977 261333 Warning:CutS260691	-	6	0	FASTA:27-49	GTCGGCTGGAGTATAGTGCGTGG	29
BM_gRNA_496	BMgn000111|Gene013818.0	Bm_scaf43 2 0 263373 263667 - 918 263353 263687	-	6	0	FASTA:197-219	TTCTCACGAGGCCTCCGATGTGG	199
BM_gRNA_497	BMgn000111|Gene013818.1	Bm_scaf43 2 295 260997 261313 - 918 260977 261333 Warning:CutS260691	-	6	0	FASTA:92-114	TCTCCGGGGGACTGATCTCCGGG	94
BM_gRNA_498	BMgn000111|Gene013818.0	Bm_scaf43 2 0 263373 263667 - 918 263353 263687	-	5	0	FASTA:49-71	GGTAGTGCAATATCTCTTGTGGG	51
BM_gRNA_499	BMgn000112|Gene013817.0	Bm_scaf43 2 0 259377 259787 - 673 259357 259807	+	5	0	FASTA:285-307	ATTGGGCAGAGTAATAACGCCGG	304
BM_gRNA_500	BMgn000112|Gene013817.1	Bm_scaf43 2 411 257929 257965 - 673 257909 257985 Warning:CutS257704	+	4	0	FASTA:24-46	CTGCAGAACGAAAGTACACCAGG	43
BM_gRNA_501	BMgn000112|Gene013817.0	Bm_scaf43 2 0 259377 259787 - 673 259357 259807	-	5	0	FASTA:309-331	TCCTAGCTCCAGCCTTCCAAGGG	311
BM_gRNA_502	BMgn000112|Gene013817.0	Bm_scaf43 2 0 259377 259787 - 673 259357 259807	-	5	0	FASTA:335-357	AACACGTCCGCCGGACTCCACGG	337
BM_gRNA_503	BMgn000112|Gene013817.0	Bm_scaf43 2 0 259377 259787 - 673 259357 259807	-	4	0	FASTA:403-425	TGTTGAAATGTGGAAGTGTACGG	405
BM_gRNA_504	BMgn000113|Gene013816.1	Bm_scaf43 2 15 247699 247939 - 384 247679 247959 Warning:CutS247571	-	6	0	FASTA:108-130	AAAGAATCGTGCCCGAAATCCGG	110
BM_gRNA_505	BMgn000113|Gene013816.1	Bm_scaf43 2 15 247699 247939 - 384 247679 247959 Warning:CutS247571	-	5	0	FASTA:187-209	TGGAAAACGGCTCGTGTCTACGG	189
BM_gRNA_506	BMgn000113|Gene013816.1	Bm_scaf43 2 15 247699 247939 - 384 247679 247959 Warning:CutS247571	+	4	0	FASTA:217-239	AGGGTGTACTCAGAAGTCCTTGG	236
BM_gRNA_507	BMgn000113|Gene013816.1	Bm_scaf43 2 15 247699 247939 - 384 247679 247959 Warning:CutS247571	+	4	1	FASTA:156-178	CCTTATGATTATGTAACAGAAGG	175
BM_gRNA_508	BMgn000113|Gene013816.1	Bm_scaf43 2 15 247699 247939 - 384 247679 247959 Warning:CutS247571	-	5	0	FASTA:200-222	CACCCTTACGAAGTGGAAAACGG	202
BM_gRNA_509	BMgn000114|Gene013813.0	Bm_scaf43 7 0 155217 155348 - 1023 155197 155368	-	5	0	FASTA:71-93	CTGCCATGAGCTCGGAGATCAGG	73
BM_gRNA_510	BMgn000114|Gene013813.1	Bm_scaf43 7 132 154758 154893 - 1023 154738 154913	-	5	0	FASTA:30-52	TCTTTGAGATCTTTGGCCGTTGG	32
BM_gRNA_511	BMgn000114|Gene013813.2	Bm_scaf43 7 268 154049 154203 - 1023 154029 154223	-	5	0	FASTA:41-63	CTTAAAGCCTTGTTGTACAGTGG	43
BM_gRNA_512	BMgn000114|Gene013813.0	Bm_scaf43 7 0 155217 155348 - 1023 155197 155368	-	5	0	FASTA:94-116	ACGATCTACATTCACCATTCTGG	96
BM_gRNA_513	BMgn000114|Gene013813.1	Bm_scaf43 7 132 154758 154893 - 1023 154738 154913	-	5	0	FASTA:81-103	TCCGGAGTAATATTCGGTGGTGG	83
BM_gRNA_514	BMgn000115|Gene013812.0	Bm_scaf43 5 0 131960 132144 + 3553 131940 132164	-	6	0	FASTA:113-135	TCGATGATACCTGCTACTTGCGG	115
BM_gRNA_515	BMgn000115|Gene013812.1	Bm_scaf43 5 185 132255 133443 + 3553 132235 133463	-	6	0	FASTA:212-234	CTGGATTCCCTCTTCTTGGTGGG	214
BM_gRNA_516	BMgn000115|Gene013812.2	Bm_scaf43 5 1374 135076 135169 + 3553 135056 135189	+	4	0	FASTA:64-86	AGCGGCGAGACAAAAAGAAATGG	83
BM_gRNA_517	BMgn000115|Gene013812.0	Bm_scaf43 5 0 131960 132144 + 3553 131940 132164	-	5	0	FASTA:49-71	CAAGGGGTCGTAGCTTCGATAGG	51
BM_gRNA_518	BMgn000115|Gene013812.1	Bm_scaf43 5 185 132255 133443 + 3553 132235 133463	+	6	0	FASTA:538-560	TTAACTCAGTTTCACCTCCGAGG	557
BM_gRNA_519	BMgn000116|Gene013814.1	Bm_scaf43 2 22 230622 230743 + 216 230602 230763 Warning:CutE230815	-	6	0	FASTA:123-145	GGGCTTCCCCCCCACGGGCAGGG	125
BM_gRNA_520	BMgn000116|Gene013814.1	Bm_scaf43 2 22 230622 230743 + 216 230602 230763 Warning:CutE230815	+	5	0	FASTA:34-56	CTTCTCAACGGATCCGGAATCGG	53
BM_gRNA_521	BMgn000116|Gene013814.1	Bm_scaf43 2 22 230622 230743 + 216 230602 230763 Warning:CutE230815	+	5	0	FASTA:65-87	GAATTCGCGTTTGACAACCCTGG	84
BM_gRNA_522	BMgn000116|Gene013814.1	Bm_scaf43 2 22 230622 230743 + 216 230602 230763 Warning:CutE230815	+	5	0	FASTA:87-109	GCTTCAAGCAAGACGAGCGTTGG	106
BM_gRNA_523	BMgn000116|Gene013814.1	Bm_scaf43 2 22 230622 230743 + 216 230602 230763 Warning:CutE230815	-	4	0	FASTA:47-69	AATTCATCCTTCACCGATTCCGG	49
BM_gRNA_524	BMgn000117|Gene013815.0	Bm_scaf43 2 0 239421 239579 + 3990 239401 239599	-	6	0	FASTA:69-91	ACCTCCAACTCCACAGGGTATGG	71
BM_gRNA_525	BMgn000117|Gene013815.1	Bm_scaf43 2 159 241038 243538 + 3990 241018 243558 Warning:CutE244868	-	6	0	FASTA:47-69	AAGTGTTCGGTGACTTCGGAGGG	49
BM_gRNA_526	BMgn000117|Gene013815.0	Bm_scaf43 2 0 239421 239579 + 3990 239401 239599	-	5	0	FASTA:30-52	ATGCTGACAGCGTCCTCTAACGG	32
BM_gRNA_527	BMgn000117|Gene013815.1	Bm_scaf43 2 159 241038 243538 + 3990 241018 243558 Warning:CutE244868	-	6	0	FASTA:429-451	TGCCTCAAAACTCCGTCGTCAGG	431
BM_gRNA_528	BMgn000117|Gene013815.0	Bm_scaf43 2 0 239421 239579 + 3990 239401 239599	+	5	0	FASTA:103-125	GCAGAGCGAGCGGAGACGGCAGG	122
BM_gRNA_529	BMgn000118|Gene013822.1	Bm_scaf43 5 160 429191 429433 + 4581 429171 429453	-	5	0	FASTA:162-184	GAAACTCACGTCCAGACTGGAGG	164
BM_gRNA_530	BMgn000118|Gene013822.2	Bm_scaf43 5 403 432668 432826 + 4581 432648 432846	-	4	0	FASTA:78-100	CACATATCTTGCATTGAATTTGG	80
BM_gRNA_531	BMgn000118|Gene013822.1	Bm_scaf43 5 160 429191 429433 + 4581 429171 429453	+	5	0	FASTA:242-264	TGGCGGATCGGGAAGCCCATTGG	261
BM_gRNA_532	BMgn000118|Gene013822.2	Bm_scaf43 5 403 432668 432826 + 4581 432648 432846	-	4	0	FASTA:120-142	TTCAACAAACAAGGGACCATTGG	122
BM_gRNA_533	BMgn000118|Gene013822.1	Bm_scaf43 5 160 429191 429433 + 4581 429171 429453	-	4	0	FASTA:89-111	ACAATATCTGGTGCCCGCCGCGG	91
BM_gRNA_534	BMgn000119|Gene013823.0	Bm_scaf43 7 0 439876 440161 + 3583 439856 440181	+	4	0	FASTA:268-290	ACGAAACTAAGCATTCACGTCGG	287
BM_gRNA_535	BMgn000119|Gene013823.2	Bm_scaf43 7 359 442339 442525 + 3583 442319 442545	-	5	0	FASTA:24-46	CCTGTCGCCAAGCGTTGTCATGG	26
BM_gRNA_536	BMgn000119|Gene013823.2	Bm_scaf43 7 359 442339 442525 + 3583 442319 442545	+	5	0	FASTA:170-192	TTGCCGGACGGATTAGTCATTGG	189
BM_gRNA_537	BMgn000119|Gene013823.3	Bm_scaf43 7 546 443232 443314 + 3583 443212 443334	-	5	0	FASTA:27-49	TCAGTACCAAAGCATCACGAGGG	29
BM_gRNA_538	BMgn000119|Gene013823.2	Bm_scaf43 7 359 442339 442525 + 3583 442319 442545	+	4	0	FASTA:53-75	GATCAGCCTCTACCAAAAATAGG	72
BM_gRNA_539	BMgn000120|Gene013825.0	Bm_scaf43 1 0 456058 459167 + 4665 456038 459187 Warning:CutE460722	+	6	0	FASTA:325-347	AATGTGACGTTGCGGAAACCGGG	344
BM_gRNA_540	BMgn000120|Gene013825.0	Bm_scaf43 1 0 456058 459167 + 4665 456038 459187 Warning:CutE460722	+	6	0	FASTA:545-567	TCAGGTTGCGGTATTTCCTGCGG	564
BM_gRNA_541	BMgn000120|Gene013825.0	Bm_scaf43 1 0 456058 459167 + 4665 456038 459187 Warning:CutE460722	+	5	0	FASTA:183-205	TTTCGGGTTCGGTCAGACGGCGG	202
BM_gRNA_542	BMgn000120|Gene013825.0	Bm_scaf43 1 0 456058 459167 + 4665 456038 459187 Warning:CutE460722	+	5	0	FASTA:222-244	TGATGATGCTGACAAACGGAAGG	241
BM_gRNA_543	BMgn000120|Gene013825.0	Bm_scaf43 1 0 456058 459167 + 4665 456038 459187 Warning:CutE460722	+	5	0	FASTA:295-317	TATGACGGTGAAACGGTCTCCGG	314
BM_gRNA_544	BMgn000121|Gene013826.1	Bm_scaf43 2 157 467304 468544 + 2097 467284 468564 Warning:CutE469243	+	6	0	FASTA:615-637	GGACGCTGCGAGACATTTGGTGG	634
BM_gRNA_545	BMgn000121|Gene013826.1	Bm_scaf43 2 157 467304 468544 + 2097 467284 468564 Warning:CutE469243	-	6	0	FASTA:649-671	CTGTAAGTGTGCCGGAGATAGGG	651
BM_gRNA_546	BMgn000121|Gene013826.1	Bm_scaf43 2 157 467304 468544 + 2097 467284 468564 Warning:CutE469243	+	6	0	FASTA:765-787	GGCGGCTGCCGTCAAATCTCTGG	784
BM_gRNA_547	BMgn000121|Gene013826.1	Bm_scaf43 2 157 467304 468544 + 2097 467284 468564 Warning:CutE469243	+	6	0	FASTA:868-890	AGTATAGGCATCTCGACTCGAGG	887
BM_gRNA_548	BMgn000121|Gene013826.1	Bm_scaf43 2 157 467304 468544 + 2097 467284 468564 Warning:CutE469243	+	5	0	FASTA:516-538	TATCGGTCTGACCGTGAGATTGG	535
BM_gRNA_549	BMgn000122|Gene013828.0	Bm_scaf43 3 0 474115 474361 + 952 474095 474381	-	5	0	FASTA:157-179	TTCCTCGGGGTCTACACCTTCGG	159
BM_gRNA_550	BMgn000122|Gene013828.1	Bm_scaf43 3 247 474552 474686 + 952 474532 474706	+	5	0	FASTA:106-128	CGGTGATTATCGAGCTAAAATGG	125
BM_gRNA_551	BMgn000122|Gene013828.0	Bm_scaf43 3 0 474115 474361 + 952 474095 474381	-	4	0	FASTA:81-103	TTGTGCAATCTTGTTGGTTTAGG	83
BM_gRNA_552	BMgn000122|Gene013828.1	Bm_scaf43 3 247 474552 474686 + 952 474532 474706	+	4	0	FASTA:57-79	ACAATAATCAGCCGATTATAAGG	76
BM_gRNA_553	BMgn000122|Gene013828.0	Bm_scaf43 3 0 474115 474361 + 952 474095 474381	-	4	0	FASTA:132-154	TCATGTTTATCAATTTTACAAGG	134
BM_gRNA_554	BMgn000123|Gene013831.1	Bm_scaf43 8 200 520058 520185 + 2974 520038 520205	-	6	0	FASTA:90-112	ACGGTCGCCTGTCCGGGCCGAGG	92
BM_gRNA_555	BMgn000123|Gene013831.2	Bm_scaf43 8 328 524669 524821 + 2974 524649 524841	+	7	0	FASTA:70-92	CACGGATCGGAATGGGCGTACGG	89
BM_gRNA_556	BMgn000123|Gene013831.1	Bm_scaf43 8 200 520058 520185 + 2974 520038 520205	-	5	0	FASTA:45-67	GATAGCAGCGACATGCAAGACGG	47
BM_gRNA_557	BMgn000123|Gene013831.2	Bm_scaf43 8 328 524669 524821 + 2974 524649 524841	-	6	0	FASTA:113-135	CGGCGATATCTCGAAGACCCCGG	115
BM_gRNA_558	BMgn000123|Gene013831.1	Bm_scaf43 8 200 520058 520185 + 2974 520038 520205	-	5	0	FASTA:116-138	AATACATATCGTAAACGTTGAGG	118
BM_gRNA_559	BMgn000124|Gene013833.0	Bm_scaf43 2 0 567951 568126 + 312 567931 568146	-	4	0	FASTA:81-103	TCTTGTATCTCGGCTTCAGTTGG	83
BM_gRNA_560	BMgn000124|Gene013833.1	Bm_scaf43 2 176 568578 568609 + 312 568558 568629 Warning:CutE568713	-	5	0	FASTA:28-50	AACAGCATTTCAGCGCTCGCCGG	30
BM_gRNA_561	BMgn000124|Gene013833.0	Bm_scaf43 2 0 567951 568126 + 312 567931 568146	+	4	0	FASTA:117-139	ACGGAAAACAAAGAAGCAACTGG	136
BM_gRNA_562	BMgn000124|Gene013833.0	Bm_scaf43 2 0 567951 568126 + 312 567931 568146	-	4	0	FASTA:147-169	TAAGGTAAAAAGTTCGTTAACGG	149
BM_gRNA_563	BMgn000124|Gene013833.0	Bm_scaf43 2 0 567951 568126 + 312 567931 568146	-	4	0	FASTA:91-113	TAAAATCACCTCTTGTATCTCGG	93
BM_gRNA_564	BMgn000125|Gene013838.0	Bm_scaf43 1 0 677512 678113 + 903 677492 678133 Warning:CutE678414	-	5	0	FASTA:163-185	TACGAAAGACAACTTCTTAATGG	165
BM_gRNA_565	BMgn000125|Gene013838.0	Bm_scaf43 1 0 677512 678113 + 903 677492 678133 Warning:CutE678414	+	5	0	FASTA:502-524	ATAGTGCTAGTGAATTGCTATGG	521
BM_gRNA_566	BMgn000125|Gene013838.0	Bm_scaf43 1 0 677512 678113 + 903 677492 678133 Warning:CutE678414	-	4	0	FASTA:233-255	TCTTTAGTGACTCATTCGTTAGG	235
BM_gRNA_567	BMgn000125|Gene013838.0	Bm_scaf43 1 0 677512 678113 + 903 677492 678133 Warning:CutE678414	-	4	0	FASTA:261-283	TTTGCTCTCTGTTTAAATGTCGG	263
BM_gRNA_568	BMgn000125|Gene013838.0	Bm_scaf43 1 0 677512 678113 + 903 677492 678133 Warning:CutE678414	-	4	0	FASTA:312-334	GCGACTAAACATATAGGCTTCGG	314
BM_gRNA_569	BMgn000126|Gene013839.0	Bm_scaf43 4 0 691721 691861 + 540 691701 691881	+	6	0	FASTA:62-84	CAATCTGGACACTGTCGCCTTGG	81
BM_gRNA_570	BMgn000126|Gene013839.1	Bm_scaf43 4 141 692330 692392 + 540 692310 692412	-	4	0	FASTA:35-57	CGGACAAGAATTTCTTCTCGAGG	37
BM_gRNA_571	BMgn000126|Gene013839.2	Bm_scaf43 4 204 694236 694391 + 540 694216 694411 Warning:CutE694401	-	5	0	FASTA:33-55	TCCTCCTTCGACGGCAGGAACGG	35
BM_gRNA_572	BMgn000126|Gene013839.0	Bm_scaf43 4 0 691721 691861 + 540 691701 691881	+	6	0	FASTA:91-113	ACTCCGAAGAGGTTAAGTCCAGG	110
BM_gRNA_573	BMgn000126|Gene013839.2	Bm_scaf43 4 204 694236 694391 + 540 694216 694411 Warning:CutE694401	-	5	0	FASTA:63-85	GCCTGCAGGCGCCGCGTCAACGG	65
BM_gRNA_574	BMgn000127|Gene013841.1	Bm_scaf43 3 393 780100 780287 + 872 780080 780307 Warning:CutE780392	+	6	0	FASTA:141-163	GCCGGACAACTTAGTATCTGCGG	160
BM_gRNA_575	BMgn000127|Gene013841.1	Bm_scaf43 3 393 780100 780287 + 872 780080 780307 Warning:CutE780392	-	5	0	FASTA:55-77	CTGAAGCAATATGTGCCATCAGG	57
BM_gRNA_576	BMgn000127|Gene013841.1	Bm_scaf43 3 393 780100 780287 + 872 780080 780307 Warning:CutE780392	+	5	0	FASTA:123-145	TCTAGCACAGACAGTGAAGCCGG	142
BM_gRNA_577	BMgn000127|Gene013841.1	Bm_scaf43 3 393 780100 780287 + 872 780080 780307 Warning:CutE780392	+	5	0	FASTA:154-176	GTATCTGCGGGGACATGCTTCGG	173
BM_gRNA_578	BMgn000127|Gene013841.1	Bm_scaf43 3 393 780100 780287 + 872 780080 780307 Warning:CutE780392	+	6	0	FASTA:143-165	CGGACAACTTAGTATCTGCGGGG	162
BM_gRNA_579	BMgn000128|Gene013847.0	Bm_scaf43 6 0 1279228 1279548 + 1266 1279208 1279568	+	7	0	FASTA:226-248	GCGCTAGTTGCCTGGACGACGGG	245
BM_gRNA_580	BMgn000128|Gene013847.1	Bm_scaf43 6 321 1280322 1280648 + 1266 1280302 1280668	-	5	0	FASTA:79-101	GCACTGCGCCCAAATGTATCGGG	81
BM_gRNA_581	BMgn000128|Gene013847.2	Bm_scaf43 6 648 1281718 1281806 + 1266 1281698 1281826	-	5	0	FASTA:65-87	ATATAATCGCGTTGACGATGTGG	67
BM_gRNA_582	BMgn000128|Gene013847.0	Bm_scaf43 6 0 1279228 1279548 + 1266 1279208 1279568	+	5	0	FASTA:69-91	CAACAGATCGAATCCTCTCTTGG	88
BM_gRNA_583	BMgn000128|Gene013847.1	Bm_scaf43 6 321 1280322 1280648 + 1266 1280302 1280668	-	5	0	FASTA:133-155	AGCTATTACCTTCGTTAAGGCGG	135
BM_gRNA_584	BMgn000129|Gene013848.0	Bm_scaf43 3 0 1307348 1307539 + 1325 1307328 1307559	-	5	0	FASTA:111-133	CGTCGATCTGTTTCTCGTCACGG	113
BM_gRNA_585	BMgn000129|Gene013848.1	Bm_scaf43 3 192 1308816 1308947 + 1325 1308796 1308967	+	5	0	FASTA:40-62	GAATACACGCACCAGTGCCAGGG	59
BM_gRNA_586	BMgn000129|Gene013848.0	Bm_scaf43 3 0 1307348 1307539 + 1325 1307328 1307559	+	5	0	FASTA:172-194	TTCCTCGAGGATCTGCAGAAGGG	191
BM_gRNA_587	BMgn000129|Gene013848.1	Bm_scaf43 3 192 1308816 1308947 + 1325 1308796 1308967	+	5	0	FASTA:131-153	AGAAGAAGATGTTGTACTCTAGG	150
BM_gRNA_588	BMgn000129|Gene013848.0	Bm_scaf43 3 0 1307348 1307539 + 1325 1307328 1307559	+	4	0	FASTA:21-43	GGCGTCTGGTGTGACAGTTTCGG	40
BM_gRNA_589	BMgn000130|Gene013850.0	Bm_scaf43 7 0 1337396 1337949 + 3580 1337376 1337969	+	6	0	FASTA:327-349	TCATCGCTGCCAACTGAGATAGG	346
BM_gRNA_590	BMgn000130|Gene013850.1	Bm_scaf43 7 554 1340485 1340647 + 3580 1340465 1340667	-	5	0	FASTA:58-80	GTCATTCTGTCCATCGTATCTGG	60
BM_gRNA_591	BMgn000130|Gene013850.0	Bm_scaf43 7 0 1337396 1337949 + 3580 1337376 1337969	-	5	0	FASTA:267-289	ATTAGAAGCGTTATCTCAACAGG	269
BM_gRNA_592	BMgn000130|Gene013850.1	Bm_scaf43 7 554 1340485 1340647 + 3580 1340465 1340667	-	5	0	FASTA:84-106	TACGTAAATTACAATGGACGAGG	86
BM_gRNA_593	BMgn000130|Gene013850.0	Bm_scaf43 7 0 1337396 1337949 + 3580 1337376 1337969	-	5	0	FASTA:408-430	TTCTCCAGATCACCGATTTCCGG	410
BM_gRNA_594	BMgn000131|Gene013852.0	Bm_scaf43 4 0 1370926 1371172 + 2970 1370906 1371192	+	7	0	FASTA:231-253	TTACCGCCGCCTAACGTAACAGG	250
BM_gRNA_595	BMgn000131|Gene013852.1	Bm_scaf43 4 247 1371567 1371676 + 2970 1371547 1371696	+	7	0	FASTA:95-117	CTCCCTGGAACGGATCATGCAGG	114
BM_gRNA_596	BMgn000131|Gene013852.2	Bm_scaf43 4 357 1371766 1372256 + 2970 1371746 1372276	+	5	0	FASTA:134-156	TACAGAACAGCTTCGAACCTTGG	153
BM_gRNA_597	BMgn000131|Gene013852.0	Bm_scaf43 4 0 1370926 1371172 + 2970 1370906 1371192	-	5	0	FASTA:117-139	TCTGGTCTGTATGCAGCGGCGGG	119
BM_gRNA_598	BMgn000131|Gene013852.1	Bm_scaf43 4 247 1371567 1371676 + 2970 1371547 1371696	+	4	0	FASTA:39-61	CGATACAAGACGTAATAGTTAGG	58
BM_gRNA_599	BMgn000132|Gene013855.2	Bm_scaf43 20 394 1396408 1396535 + 4006 1396388 1396555	+	7	0	FASTA:50-72	GGCCGATGGCACGTTCCGTGTGG	69
BM_gRNA_600	BMgn000132|Gene013855.2	Bm_scaf43 20 394 1396408 1396535 + 4006 1396388 1396555	+	6	0	FASTA:104-126	ATACAGGACGCAGCTGGCGTTGG	123
BM_gRNA_601	BMgn000132|Gene013855.2	Bm_scaf43 20 394 1396408 1396535 + 4006 1396388 1396555	+	4	0	FASTA:29-51	TGCCTTCAAGTTATCAGCGCTGG	48
BM_gRNA_602	BMgn000132|Gene013855.2	Bm_scaf43 20 394 1396408 1396535 + 4006 1396388 1396555	+	4	0	FASTA:88-110	ATCCTCTATACCCAAGATACAGG	107
BM_gRNA_603	BMgn000132|Gene013855.2	Bm_scaf43 20 394 1396408 1396535 + 4006 1396388 1396555	-	5	0	FASTA:65-87	CCGCTTCATCGAGCTCCACACGG	67
BM_gRNA_604	BMgn000133|Gene013858.4	Bm_scaf43 9 998 1437813 1438000 + 1804 1437793 1438020	+	4	0	FASTA:30-52	GTTCACATTTGTGAAATATGCGG	49
BM_gRNA_605	BMgn000133|Gene013858.4	Bm_scaf43 9 998 1437813 1438000 + 1804 1437793 1438020	+	4	0	FASTA:62-84	TCAAAGCGAAGATGAACTATCGG	81
BM_gRNA_606	BMgn000133|Gene013858.4	Bm_scaf43 9 998 1437813 1438000 + 1804 1437793 1438020	+	4	1	FASTA:111-133	AAATTCACTTGTTACTACTGCGG	130
BM_gRNA_607	BMgn000133|Gene013858.0	Bm_scaf43 9 0 1435604 1435674 + 1804 1435584 1435694	+	5	0	FASTA:70-92	CAAAATGCGAACGCATCCATAGG	89
BM_gRNA_608	BMgn000133|Gene013858.1	Bm_scaf43 9 71 1435771 1435974 + 1804 1435751 1435994	+	5	0	FASTA:66-88	GTCGTCCGATATCTTTCCAATGG	85
BM_gRNA_609	BMgn000134|Gene013860.0	Bm_scaf43 20 0 1552823 1553426 + 5613 1552803 1553446	+	6	0	FASTA:219-241	GAACGTTATACTTCCAGGGATGG	238
BM_gRNA_610	BMgn000134|Gene013860.0	Bm_scaf43 20 0 1552823 1553426 + 5613 1552803 1553446	-	6	0	FASTA:314-336	GATGGCGTCCGGCTTGCTGACGG	316
BM_gRNA_611	BMgn000134|Gene013860.0	Bm_scaf43 20 0 1552823 1553426 + 5613 1552803 1553446	+	6	0	FASTA:390-412	CAGGGCTCTGGAGAACCAACCGG	409
BM_gRNA_612	BMgn000134|Gene013860.0	Bm_scaf43 20 0 1552823 1553426 + 5613 1552803 1553446	+	6	0	FASTA:449-471	GGCCCGTGACCGATGAGCAGAGG	468
BM_gRNA_613	BMgn000134|Gene013860.0	Bm_scaf43 20 0 1552823 1553426 + 5613 1552803 1553446	+	5	0	FASTA:157-179	TACGAAGTTTCCTGCGTCGCCGG	176
BM_gRNA_614	BMgn000138|Gene013862.0	Bm_scaf43 1 0 1740949 1741808 + 1291 1740929 1741828 Warning:CutE1742239	+	7	0	FASTA:245-267	GATAGTCGCGGGCTACGACTGGG	264
BM_gRNA_615	BMgn000138|Gene013862.0	Bm_scaf43 1 0 1740949 1741808 + 1291 1740929 1741828 Warning:CutE1742239	-	6	0	FASTA:765-787	AACCGGGCTGTGATGCGCGACGG	767
BM_gRNA_616	BMgn000138|Gene013862.0	Bm_scaf43 1 0 1740949 1741808 + 1291 1740929 1741828 Warning:CutE1742239	+	6	0	FASTA:811-833	GCTCAGTGTGCTATTGGGCTTGG	830
BM_gRNA_617	BMgn000138|Gene013862.0	Bm_scaf43 1 0 1740949 1741808 + 1291 1740929 1741828 Warning:CutE1742239	+	5	0	FASTA:185-207	CCCAAATATTGCCGTAAATGCGG	204
BM_gRNA_618	BMgn000138|Gene013862.0	Bm_scaf43 1 0 1740949 1741808 + 1291 1740929 1741828 Warning:CutE1742239	-	5	0	FASTA:221-243	GTGTTTCTGCAGGTAAATCTTGG	223
BM_gRNA_619	BMgn000139|Gene013863.0	Bm_scaf43 4 0 1756254 1756397 + 501 1756234 1756417	-	5	0	FASTA:141-163	TCTTCTTTCTCCACATCATGTGG	143
BM_gRNA_620	BMgn000139|Gene013863.1	Bm_scaf43 4 144 1756972 1757067 + 501 1756952 1757087	-	5	0	FASTA:32-54	CCACTTCTAGCGGACACCAACGG	34
BM_gRNA_621	BMgn000139|Gene013863.2	Bm_scaf43 4 240 1757701 1757794 + 501 1757681 1757814 Warning:CutE1757826	+	6	0	FASTA:58-80	ACGATAGCTCGGTGCTGGATCGG	77
BM_gRNA_622	BMgn000139|Gene013863.0	Bm_scaf43 4 0 1756254 1756397 + 501 1756234 1756417	-	4	0	FASTA:87-109	CATAGGGATTTGGCACGAGTTGG	89
BM_gRNA_623	BMgn000139|Gene013863.1	Bm_scaf43 4 144 1756972 1757067 + 501 1756952 1757087	+	5	0	FASTA:92-114	CATGTACGCCGCCACCGTGTGGG	111
BM_gRNA_624	BMgn000140|Gene013865.0	Bm_scaf43 6 0 1794323 1794403 + 890 1794303 1794423	-	5	0	FASTA:65-87	CTCATCGACCGGGATCTTTGAGG	67
BM_gRNA_625	BMgn000140|Gene013865.1	Bm_scaf43 6 81 1796228 1796352 + 890 1796208 1796372	-	6	0	FASTA:27-49	CCGTCGCCCCGCGCCGTTTTTGG	29
BM_gRNA_626	BMgn000140|Gene013865.2	Bm_scaf43 6 206 1798378 1798512 + 890 1798358 1798532	+	6	0	FASTA:97-119	TACGAACGCTGAGGATGAACTGG	116
BM_gRNA_627	BMgn000140|Gene013865.1	Bm_scaf43 6 81 1796228 1796352 + 890 1796208 1796372	-	5	0	FASTA:114-136	TGGAGCCGGTGATGCTGTCCAGG	116
BM_gRNA_628	BMgn000140|Gene013865.2	Bm_scaf43 6 206 1798378 1798512 + 890 1798358 1798532	-	4	0	FASTA:27-49	ATAATCCAACTCCTCCTCGTCGG	29
BM_gRNA_629	BMgn000141|Gene013866.0	Bm_scaf43 18 0 1803920 1805100 + 6797 1803900 1805120	+	6	0	FASTA:580-602	ATGAGCTCAGAGCAGGGTCAAGG	599
BM_gRNA_630	BMgn000141|Gene013866.1	Bm_scaf43 18 1181 1829264 1829332 + 6797 1829244 1829352	+	5	0	FASTA:25-47	CTTAAACGGTGCCTCAAAAGTGG	44
BM_gRNA_631	BMgn000141|Gene013866.2	Bm_scaf43 18 1250 1872466 1872599 + 6797 1872446 1872619	+	5	0	FASTA:46-68	AAAAAGATGCGGCATCGACGAGG	65
BM_gRNA_632	BMgn000141|Gene013866.0	Bm_scaf43 18 0 1803920 1805100 + 6797 1803900 1805120	-	6	0	FASTA:766-788	TTAAAGTCGGGCAATACGCTTGG	768
BM_gRNA_633	BMgn000141|Gene013866.2	Bm_scaf43 18 1250 1872466 1872599 + 6797 1872446 1872619	-	5	0	FASTA:138-160	TGTTACCTGTCTCTCAGTCCTGG	140
BM_gRNA_634	BMgn000144|Gene013867.0	Bm_scaf43 22 0 1972144 1972356 + 3411 1972124 1972376	-	6	0	FASTA:26-48	TGCCGTTAAGCCTTTTCGCCTGG	28
BM_gRNA_635	BMgn000144|Gene013867.1	Bm_scaf43 22 213 1973769 1973875 + 3411 1973749 1973895	+	5	0	FASTA:19-41	AGGACATCTATCACGTGACTGGG	38
BM_gRNA_636	BMgn000144|Gene013867.2	Bm_scaf43 22 320 1975121 1975259 + 3411 1975101 1975279	-	6	0	FASTA:125-147	CCAATAACGGGTGCCAATGAAGG	127
BM_gRNA_637	BMgn000144|Gene013867.0	Bm_scaf43 22 0 1972144 1972356 + 3411 1972124 1972376	+	6	0	FASTA:164-186	TTACGGCTCGTATCTGCGCAGGG	183
BM_gRNA_638	BMgn000144|Gene013867.1	Bm_scaf43 22 213 1973769 1973875 + 3411 1973749 1973895	-	5	0	FASTA:64-86	AAGGGTCTCTCTACACATGTAGG	66
BM_gRNA_639	BMgn000145|Gene013870.1	Bm_scaf43 19 154 2045546 2046412 + 3620 2045526 2046432	+	7	0	FASTA:674-696	GAGGTTGGGGCGCATGTCCCCGG	693
BM_gRNA_640	BMgn000145|Gene013870.1	Bm_scaf43 19 154 2045546 2046412 + 3620 2045526 2046432	+	6	0	FASTA:322-344	GCGCTTCCTCATGGAAACCATGG	341
BM_gRNA_641	BMgn000145|Gene013870.1	Bm_scaf43 19 154 2045546 2046412 + 3620 2045526 2046432	+	6	0	FASTA:404-426	GGACACAGCTATGGACAACCTGG	423
BM_gRNA_642	BMgn000145|Gene013870.1	Bm_scaf43 19 154 2045546 2046412 + 3620 2045526 2046432	-	6	0	FASTA:478-500	GAACCTCCCGTACGCCCATTTGG	480
BM_gRNA_643	BMgn000145|Gene013870.1	Bm_scaf43 19 154 2045546 2046412 + 3620 2045526 2046432	-	6	0	FASTA:616-638	CGCTTTAGTCGGCTTGAACGAGG	618
BM_gRNA_644	BMgn000147|Gene013871.0	Bm_scaf43 3 0 2100175 2100505 + 2336 2100155 2100525	-	6	0	FASTA:210-232	GGGCGCGAGGGCGGCCTCGACGG	212
BM_gRNA_645	BMgn000147|Gene013871.2	Bm_scaf43 3 607 2105227 2106176 + 2336 2105207 2106196 Warning:CutE2106955	-	6	0	FASTA:185-207	GCCGCAGCGTGGACTTCCAGCGG	187
BM_gRNA_646	BMgn000147|Gene013871.0	Bm_scaf43 3 0 2100175 2100505 + 2336 2100155 2100525	+	5	0	FASTA:134-156	CATTTCACAAGACCAGCTCGCGG	153
BM_gRNA_647	BMgn000147|Gene013871.2	Bm_scaf43 3 607 2105227 2106176 + 2336 2105207 2106196 Warning:CutE2106955	-	6	0	FASTA:290-312	GCTTGCGGATGTGCACGCCCAGG	292
BM_gRNA_648	BMgn000147|Gene013871.0	Bm_scaf43 3 0 2100175 2100505 + 2336 2100155 2100525	+	4	0	FASTA:107-129	GGACTACATGTACCGTGGCGAGG	126
BM_gRNA_649	BMgn000148|Gene013872.0	Bm_scaf43 2 0 2109927 2109981 + 330 2109907 2110001	+	5	0	FASTA:51-73	CACGGTGGCGTGGCTTGGCTTGG	70
BM_gRNA_650	BMgn000148|Gene013872.1	Bm_scaf43 2 55 2110029 2110193 + 330 2110009 2110213 Warning:CutE2110303	+	6	0	FASTA:45-67	TGTTGGGTTATGGGACGGCCGGG	64
BM_gRNA_651	BMgn000148|Gene013872.1	Bm_scaf43 2 55 2110029 2110193 + 330 2110009 2110213 Warning:CutE2110303	-	6	0	FASTA:84-106	GCACTCGTACAGCGTCCACCCGG	86
BM_gRNA_652	BMgn000148|Gene013872.1	Bm_scaf43 2 55 2110029 2110193 + 330 2110009 2110213 Warning:CutE2110303	+	4	0	FASTA:115-137	CGGCAATAAGTACAAGCACAAGG	134
BM_gRNA_653	BMgn000148|Gene013872.1	Bm_scaf43 2 55 2110029 2110193 + 330 2110009 2110213 Warning:CutE2110303	-	4	0	FASTA:141-163	GTACTTTATGTGTCTCTGCAAGG	143
BM_gRNA_654	BMgn000149|Gene013875.0	Bm_scaf43 7 0 2186658 2187072 + 2032 2186638 2187092	+	5	0	FASTA:142-164	GACAGTTGTAATGGCGTCGATGG	161
BM_gRNA_655	BMgn000149|Gene013875.1	Bm_scaf43 7 415 2187500 2187606 + 2032 2187480 2187626	-	5	0	FASTA:41-63	ATTCATTGATGATGGTTCTGCGG	43
BM_gRNA_656	BMgn000149|Gene013875.2	Bm_scaf43 7 522 2188681 2188860 + 2032 2188661 2188880	-	6	0	FASTA:98-120	GACGTCGAGGCTTCTCACGTTGG	100
BM_gRNA_657	BMgn000149|Gene013875.0	Bm_scaf43 7 0 2186658 2187072 + 2032 2186638 2187092	+	5	0	FASTA:225-247	TAGGTATATTGGTGAGGTTCAGG	244
BM_gRNA_658	BMgn000149|Gene013875.1	Bm_scaf43 7 415 2187500 2187606 + 2032 2187480 2187626	-	5	0	FASTA:84-106	AAACCAACCATTTCGATGAAAGG	86
BM_gRNA_659	BMgn000150|Gene013876.0	Bm_scaf43 7 0 2199235 2199623 + 2636 2199215 2199643	+	5	0	FASTA:73-95	TTTGGATTATTTCGGCGCAGCGG	92
BM_gRNA_660	BMgn000150|Gene013876.1	Bm_scaf43 7 389 2201573 2201672 + 2636 2201553 2201692	-	5	0	FASTA:60-82	GTCGATGTCGTCTAGGGCGCCGG	62
BM_gRNA_661	BMgn000150|Gene013876.2	Bm_scaf43 7 489 2202310 2202898 + 2636 2202290 2202918	-	5	0	FASTA:266-288	CGGATTTTCGAAGCCCGTTTGGG	268
BM_gRNA_662	BMgn000150|Gene013876.0	Bm_scaf43 7 0 2199235 2199623 + 2636 2199215 2199643	+	5	0	FASTA:120-142	ACTAATAGGCTTAGACAACGCGG	139
BM_gRNA_663	BMgn000150|Gene013876.1	Bm_scaf43 7 389 2201573 2201672 + 2636 2201553 2201692	+	4	0	FASTA:31-53	GCTTGTATTGGCCAACAAACAGG	50
BM_gRNA_664	BMgn000151|Gene013878.0	Bm_scaf43 1 0 2238463 2238892 + 645 2238443 2238912 Warning:CutE2239107	+	8	0	FASTA:146-168	CGCGTCGCCGGCCAGATCACAGG	165
BM_gRNA_665	BMgn000151|Gene013878.0	Bm_scaf43 1 0 2238463 2238892 + 645 2238443 2238912 Warning:CutE2239107	+	6	0	FASTA:218-240	CCAGTCGCGTCGGAAGAACAAGG	237
BM_gRNA_666	BMgn000151|Gene013878.0	Bm_scaf43 1 0 2238463 2238892 + 645 2238443 2238912 Warning:CutE2239107	-	6	0	FASTA:317-339	CGTTGTCAGGTGCGGTCCTCTGG	319
BM_gRNA_667	BMgn000151|Gene013878.0	Bm_scaf43 1 0 2238463 2238892 + 645 2238443 2238912 Warning:CutE2239107	+	6	0	FASTA:411-433	AATCACGTCTCGCAAGCTAGCGG	430
BM_gRNA_668	BMgn000151|Gene013878.0	Bm_scaf43 1 0 2238463 2238892 + 645 2238443 2238912 Warning:CutE2239107	-	5	0	FASTA:70-92	TGTTTCGTTCTCATGTTCGCCGG	72
BM_gRNA_669	BMgn000152|Gene013880.0	Bm_scaf43 1 0 2265109 2265358 + 375 2265089 2265378 Warning:CutE2265483	+	5	0	FASTA:173-195	CAAATCATGATGCCGCCTCACGG	192
BM_gRNA_670	BMgn000152|Gene013880.0	Bm_scaf43 1 0 2265109 2265358 + 375 2265089 2265378 Warning:CutE2265483	+	5	0	FASTA:222-244	CTTGGGCTGCTTTTATCACATGG	241
BM_gRNA_671	BMgn000152|Gene013880.0	Bm_scaf43 1 0 2265109 2265358 + 375 2265089 2265378 Warning:CutE2265483	-	4	0	FASTA:98-120	AGTCAGTTTGAAAATGTGTTCGG	100
BM_gRNA_672	BMgn000152|Gene013880.0	Bm_scaf43 1 0 2265109 2265358 + 375 2265089 2265378 Warning:CutE2265483	-	4	0	FASTA:263-285	ACCGAAATTAGACTACAATTTGG	265
BM_gRNA_673	BMgn000152|Gene013880.0	Bm_scaf43 1 0 2265109 2265358 + 375 2265089 2265378 Warning:CutE2265483	+	4	0	FASTA:204-226	GTAAATCTACCACTGATTCTTGG	223
BM_gRNA_674	BMgn000153|Gene013881.0	Bm_scaf43 2 0 2294963 2295106 + 995 2294943 2295126	+	6	0	FASTA:79-101	TGGACGAAAAGCCCGTCGTGTGG	98
BM_gRNA_675	BMgn000153|Gene013881.1	Bm_scaf43 2 144 2295600 2296118 + 995 2295580 2296138 Warning:CutE2296450	-	6	0	FASTA:116-138	CCGGTACGAGAGCGTTCTTGTGG	118
BM_gRNA_676	BMgn000153|Gene013881.0	Bm_scaf43 2 0 2294963 2295106 + 995 2294943 2295126	-	5	0	FASTA:127-149	ACGTTGTGGCTTCGGCAGCACGG	129
BM_gRNA_677	BMgn000153|Gene013881.1	Bm_scaf43 2 144 2295600 2296118 + 995 2295580 2296138 Warning:CutE2296450	-	6	0	FASTA:171-193	CTCCAAGCGTTAATGCGCGGCGG	173
BM_gRNA_678	BMgn000153|Gene013881.0	Bm_scaf43 2 0 2294963 2295106 + 995 2294943 2295126	+	4	0	FASTA:23-45	CAGGCTATTGAGTTCAGTGGAGG	42
BM_gRNA_679	BMgn000154|Gene013885.0	Bm_scaf43 12 0 2361636 2361840 + 1937 2361616 2361860	+	6	0	FASTA:132-154	GGAGACCAACGTACTCAAACAGG	151
BM_gRNA_680	BMgn000154|Gene013885.1	Bm_scaf43 12 205 2362028 2362366 + 1937 2362008 2362386	+	5	0	FASTA:72-94	GAGTCCCAATGCATAGTATTAGG	91
BM_gRNA_681	BMgn000154|Gene013885.2	Bm_scaf43 12 544 2363213 2363379 + 1937 2363193 2363399	+	6	0	FASTA:52-74	CATATCAGCTCAGTCTTTGGAGG	71
BM_gRNA_682	BMgn000154|Gene013885.0	Bm_scaf43 12 0 2361636 2361840 + 1937 2361616 2361860	-	5	0	FASTA:163-185	GGTGATGTTAAGTGAAGATCAGG	165
BM_gRNA_683	BMgn000154|Gene013885.1	Bm_scaf43 12 205 2362028 2362366 + 1937 2362008 2362386	+	5	0	FASTA:173-195	TAGCGCTAAAGTGACCGCCCTGG	192
BM_gRNA_684	BMgn000155|Gene013889.0	Bm_scaf43 6 0 2436499 2436772 + 923 2436479 2436792	+	5	0	FASTA:191-213	AATTTTGCTGAGCCGGCCGATGG	210
BM_gRNA_685	BMgn000155|Gene013889.1	Bm_scaf43 6 274 2437706 2437846 + 923 2437686 2437866	+	5	0	FASTA:34-56	GGCGGAGGCGTTAGTCCATCAGG	53
BM_gRNA_686	BMgn000155|Gene013889.2	Bm_scaf43 6 415 2438467 2438556 + 923 2438447 2438576	-	5	0	FASTA:25-47	CCTGCTTGCTGACTGAGTTCTGG	27
BM_gRNA_687	BMgn000155|Gene013889.0	Bm_scaf43 6 0 2436499 2436772 + 923 2436479 2436792	+	4	0	FASTA:245-267	CTCATAAATGATCAAGAATTAGG	264
BM_gRNA_688	BMgn000155|Gene013889.1	Bm_scaf43 6 274 2437706 2437846 + 923 2437686 2437866	-	5	0	FASTA:121-143	ACCATGTACAAGGCAGGGGATGG	123
BM_gRNA_689	BMgn000156|Gene013891.1	Bm_scaf43 3 18 2518039 2518220 + 300 2518019 2518240 Warning:CutE2518249	-	6	0	FASTA:133-155	CTTGAAGTTCCCCCGGTGGAAGG	135
BM_gRNA_690	BMgn000156|Gene013891.1	Bm_scaf43 3 18 2518039 2518220 + 300 2518019 2518240 Warning:CutE2518249	-	5	0	FASTA:23-45	CTATGTTGCCGGCCTGCTGAAGG	25
BM_gRNA_691	BMgn000156|Gene013891.1	Bm_scaf43 3 18 2518039 2518220 + 300 2518019 2518240 Warning:CutE2518249	-	5	0	FASTA:75-97	GCGTGAAGACGCTCGCATGCCGG	77
BM_gRNA_692	BMgn000156|Gene013891.1	Bm_scaf43 3 18 2518039 2518220 + 300 2518019 2518240 Warning:CutE2518249	-	5	0	FASTA:97-119	CGCCTTCAGCACCGACTCGTGGG	99
BM_gRNA_693	BMgn000156|Gene013891.1	Bm_scaf43 3 18 2518039 2518220 + 300 2518019 2518240 Warning:CutE2518249	-	4	0	FASTA:47-69	ACCAGAGGAACCTCCCCAGCCGG	49
BM_gRNA_694	BMgn000157|Gene013898.1	Bm_scaf43 4 247 2583568 2583686 + 568 2583548 2583706	+	6	0	FASTA:76-98	TCTCAGTTAGGGACCTCAACAGG	95
BM_gRNA_695	BMgn000157|Gene013898.1	Bm_scaf43 4 247 2583568 2583686 + 568 2583548 2583706	-	5	0	FASTA:33-55	CTTATCTCTGCACATGGTGTCGG	35
BM_gRNA_696	BMgn000157|Gene013898.1	Bm_scaf43 4 247 2583568 2583686 + 568 2583548 2583706	-	4	0	FASTA:116-138	TTACAATCTGATCTCGAGTGAGG	118
BM_gRNA_697	BMgn000157|Gene013898.1	Bm_scaf43 4 247 2583568 2583686 + 568 2583548 2583706	+	4	0	FASTA:93-115	AACAGGCAACTCAAAATGCGAGG	112
BM_gRNA_698	BMgn000157|Gene013898.1	Bm_scaf43 4 247 2583568 2583686 + 568 2583548 2583706	+	4	0	FASTA:64-86	AACTAGTTTCTATCTCAGTTAGG	83
BM_gRNA_699	BMgn000158|Gene013899.0	Bm_scaf43 2 0 2701472 2701603 + 2161 2701452 2701623	+	5	0	FASTA:35-57	TGATTTCGTCGTTGTCGGATCGG	54
BM_gRNA_700	BMgn000158|Gene013899.1	Bm_scaf43 2 132 2702651 2703958 + 2161 2702631 2703978 Warning:CutE2704679	+	6	0	FASTA:111-133	GGCGCGTACAAGCTGTCGACGGG	130
BM_gRNA_701	BMgn000158|Gene013899.0	Bm_scaf43 2 0 2701472 2701603 + 2161 2701452 2701623	+	4	0	FASTA:105-127	CGAGTTCTTTTGATTGAAGCAGG	124
BM_gRNA_702	BMgn000158|Gene013899.1	Bm_scaf43 2 132 2702651 2703958 + 2161 2702631 2703978 Warning:CutE2704679	-	6	0	FASTA:167-189	TGTCTCCTCGGAGATGGAGTAGG	169
BM_gRNA_703	BMgn000158|Gene013899.1	Bm_scaf43 2 132 2702651 2703958 + 2161 2702631 2703978 Warning:CutE2704679	-	6	0	FASTA:310-332	ACCTTCAGTCCCGTGGTAGTCGG	312
BM_gRNA_704	BMgn000159|Gene013900.0	Bm_scaf43 1 0 2729522 2730201 + 1020 2729502 2730221 Warning:CutE2730541	+	2	0	FASTA:152-174	AATTTTGTATTTGCCTTTATTGG	171
BM_gRNA_705	BMgn000160|Gene013902.0	Bm_scaf43 2 0 2864877 2865063 + 375 2864857 2865083	-	6	0	FASTA:113-135	CTGAGCCCTCCTGAACTCGCAGG	115
BM_gRNA_706	BMgn000160|Gene013902.1	Bm_scaf43 2 187 2870811 2870873 + 375 2870791 2870893 Warning:CutE2870998	-	6	0	FASTA:37-59	TCGTGTACCTCGGGTACCCTGGG	39
BM_gRNA_707	BMgn000160|Gene013902.0	Bm_scaf43 2 0 2864877 2865063 + 375 2864857 2865083	-	6	0	FASTA:160-182	CTGCACCTGGCCTGCTAGATTGG	162
BM_gRNA_708	BMgn000160|Gene013902.1	Bm_scaf43 2 187 2870811 2870873 + 375 2870791 2870893 Warning:CutE2870998	+	5	1	FASTA:59-81	ATGTTCGGTGATCGTCGGAACGG	78
BM_gRNA_709	BMgn000160|Gene013902.0	Bm_scaf43 2 0 2864877 2865063 + 375 2864857 2865083	-	5	0	FASTA:64-86	CTGTTGGAAGGCTGCTGTCGTGG	66
BM_gRNA_710	BMgn000161|Gene013903.0	Bm_scaf43 2 0 2926017 2926083 + 327 2925997 2926103	+	5	0	FASTA:23-45	GTCGTTTGAGGAATATCATACGG	42
BM_gRNA_711	BMgn000161|Gene013903.1	Bm_scaf43 2 67 2926156 2926306 + 327 2926136 2926326 Warning:CutE2926415	+	6	0	FASTA:22-44	GGTGGGTAAAGGGGTGTGGCGGG	41
BM_gRNA_712	BMgn000161|Gene013903.0	Bm_scaf43 2 0 2926017 2926083 + 327 2925997 2926103	+	5	0	FASTA:44-66	GGTCATGGAGCATCATGGAAAGG	63
BM_gRNA_713	BMgn000161|Gene013903.0	Bm_scaf43 2 0 2926017 2926083 + 327 2925997 2926103	+	5	0	FASTA:29-51	TGAGGAATATCATACGGTCATGG	48
BM_gRNA_714	BMgn000161|Gene013903.0	Bm_scaf43 2 0 2926017 2926083 + 327 2925997 2926103	+	5	0	FASTA:39-61	CATACGGTCATGGAGCATCATGG	58
BM_gRNA_715	BMgn000162|Gene013904.1	Bm_scaf43 2 64 2995747 2995840 + 237 2995727 2995860 Warning:CutE2995919	-	6	0	FASTA:21-43	GATCTCTACCGATTTAGGGGGGG	23
BM_gRNA_716	BMgn000162|Gene013904.1	Bm_scaf43 2 64 2995747 2995840 + 237 2995727 2995860 Warning:CutE2995919	+	6	0	FASTA:67-89	GCTGGAGGTCAAGGAAGGCGAGG	86
BM_gRNA_717	BMgn000162|Gene013904.1	Bm_scaf43 2 64 2995747 2995840 + 237 2995727 2995860 Warning:CutE2995919	-	5	0	FASTA:45-67	CTTCGAGTTCGGGGGATGATTGG	47
BM_gRNA_718	BMgn000162|Gene013904.1	Bm_scaf43 2 64 2995747 2995840 + 237 2995727 2995860 Warning:CutE2995919	-	4	0	FASTA:96-118	ATTCTTCACGAAGCATTCCAAGG	98
BM_gRNA_719	BMgn000162|Gene013904.1	Bm_scaf43 2 64 2995747 2995840 + 237 2995727 2995860 Warning:CutE2995919	+	5	0	FASTA:79-101	GGAAGGCGAGGACGTGTCCTTGG	98
BM_gRNA_720	BMgn000163|Gene013905.0	Bm_scaf43 4 0 3067258 3067381 + 432 3067238 3067401	-	5	0	FASTA:49-71	CGCTTTGTTATCGGACGCATCGG	51
BM_gRNA_721	BMgn000163|Gene013905.1	Bm_scaf43 4 124 3072542 3072705 + 432 3072522 3072725 Warning:CutE3072709	-	6	0	FASTA:30-52	GGGTCCAGATATAGTGACGTGGG	32
BM_gRNA_722	BMgn000163|Gene013905.0	Bm_scaf43 4 0 3067258 3067381 + 432 3067238 3067401	+	5	0	FASTA:98-120	CATGATCAGCAACACGCTGAAGG	117
BM_gRNA_723	BMgn000163|Gene013905.1	Bm_scaf43 4 124 3072542 3072705 + 432 3072522 3072725 Warning:CutE3072709	-	6	0	FASTA:74-96	GTACTGCAGGTCAGGGGAACTGG	76
BM_gRNA_724	BMgn000163|Gene013905.0	Bm_scaf43 4 0 3067258 3067381 + 432 3067238 3067401	+	4	0	FASTA:26-48	TGAAAACGTGCTCTCCTTCACGG	45
BM_gRNA_725	BMgn000164|Gene013906.0	Bm_scaf43 15 0 3092463 3092654 + 2517 3092443 3092674	-	6	0	FASTA:78-100	GTTATCATGGGCGCCGAAGGTGG	80
BM_gRNA_726	BMgn000164|Gene013906.1	Bm_scaf43 15 192 3095350 3095503 + 2517 3095330 3095523	-	6	0	FASTA:88-110	TCTGTACTGGGCCTGATTGTCGG	90
BM_gRNA_727	BMgn000164|Gene013906.2	Bm_scaf43 15 346 3095947 3096084 + 2517 3095927 3096104	-	6	0	FASTA:99-121	GGCAGGCGGGTTGCTAGACGCGG	101
BM_gRNA_728	BMgn000164|Gene013906.0	Bm_scaf43 15 0 3092463 3092654 + 2517 3092443 3092674	+	6	0	FASTA:144-166	AAGCTGGCCTGCATCTCGACTGG	163
BM_gRNA_729	BMgn000164|Gene013906.1	Bm_scaf43 15 192 3095350 3095503 + 2517 3095330 3095523	-	4	0	FASTA:118-140	TATCTCGGTCGCACTGTTCGTGG	120
BM_gRNA_730	BMgn000165|Gene013907.0	Bm_scaf43 2 0 3112101 3112157 + 309 3112081 3112177	-	5	0	FASTA:39-61	GGGTGCAGCACGGTGACGTCAGG	41
BM_gRNA_731	BMgn000165|Gene013907.1	Bm_scaf43 2 57 3112940 3113088 + 309 3112920 3113108 Warning:CutE3113191	-	6	0	FASTA:149-171	TGGTGAGGTTCTGCACCGTCAGG	151
BM_gRNA_732	BMgn000165|Gene013907.1	Bm_scaf43 2 57 3112940 3113088 + 309 3112920 3113108 Warning:CutE3113191	-	5	0	FASTA:32-54	GCTGTTTCGTAGACGGCGTCTGG	34
BM_gRNA_733	BMgn000165|Gene013907.1	Bm_scaf43 2 57 3112940 3113088 + 309 3112920 3113108 Warning:CutE3113191	-	5	0	FASTA:74-96	GCCCGTACTTGTGCCTCGACGGG	76
BM_gRNA_734	BMgn000165|Gene013907.1	Bm_scaf43 2 57 3112940 3113088 + 309 3112920 3113108 Warning:CutE3113191	-	5	0	FASTA:100-122	GGAGGAGACGGGACTCCCGTAGG	102
BM_gRNA_735	BMgn000166|Gene013908.1	Bm_scaf43 6 134 3234541 3234730 + 1713 3234521 3234750	-	6	0	FASTA:96-118	AGTTGTCACTTCCTGGCACCTGG	98
BM_gRNA_736	BMgn000166|Gene013908.2	Bm_scaf43 6 324 3239456 3239696 + 1713 3239436 3239716	-	6	0	FASTA:39-61	GTGCCGGTGGAGCATCGTTGGGG	41
BM_gRNA_737	BMgn000166|Gene013908.1	Bm_scaf43 6 134 3234541 3234730 + 1713 3234521 3234750	-	5	0	FASTA:123-145	GTGCTTTGGCCCAAGAAGACTGG	125
BM_gRNA_738	BMgn000166|Gene013908.2	Bm_scaf43 6 324 3239456 3239696 + 1713 3239436 3239716	-	5	0	FASTA:86-108	TATGGACTCGATGAGGGGTCGGG	88
BM_gRNA_739	BMgn000166|Gene013908.1	Bm_scaf43 6 134 3234541 3234730 + 1713 3234521 3234750	+	4	0	FASTA:64-86	GATACTTCTTCTCATCATTTTGG	83
BM_gRNA_740	BMgn000167|Gene013910.0	Bm_scaf43 3 0 3276873 3277098 + 1562 3276853 3277118	+	6	0	FASTA:189-211	ACGATGACGCCAGAACTAAATGG	208
BM_gRNA_741	BMgn000167|Gene013910.1	Bm_scaf43 3 226 3277694 3277804 + 1562 3277674 3277824	+	5	0	FASTA:40-62	GACGACTCAAGCTACCACAACGG	59
BM_gRNA_742	BMgn000167|Gene013910.2	Bm_scaf43 3 337 3279296 3279999 + 1562 3279276 3280019 Warning:CutE3280520	-	6	0	FASTA:96-118	TTTCTATCCAGTAACCGTCCGGG	98
BM_gRNA_743	BMgn000167|Gene013910.0	Bm_scaf43 3 0 3276873 3277098 + 1562 3276853 3277118	-	4	0	FASTA:213-235	CAACGTGGCTTTCCTAGTCATGG	215
BM_gRNA_744	BMgn000167|Gene013910.1	Bm_scaf43 3 226 3277694 3277804 + 1562 3277674 3277824	-	5	0	FASTA:73-95	CCAATATGTCCGAAACCGCGAGG	75
BM_gRNA_745	BMgn000168|Gene013911.1	Bm_scaf43 2 9 3302758 3304136 + 2082 3302738 3304156 Warning:CutE3304830	+	7	0	FASTA:212-234	TCTTCAGCCGATACCGAAGGAGG	231
BM_gRNA_746	BMgn000168|Gene013911.1	Bm_scaf43 2 9 3302758 3304136 + 2082 3302738 3304156 Warning:CutE3304830	+	5	0	FASTA:143-165	TTTAATACTGAACGATGCTCAGG	162
BM_gRNA_747	BMgn000168|Gene013911.1	Bm_scaf43 2 9 3302758 3304136 + 2082 3302738 3304156 Warning:CutE3304830	+	5	0	FASTA:423-445	GAAACGGGCTTCACTCAACGCGG	442
BM_gRNA_748	BMgn000168|Gene013911.1	Bm_scaf43 2 9 3302758 3304136 + 2082 3302738 3304156 Warning:CutE3304830	+	5	0	FASTA:725-747	TAAAAATATTGCTAACGGTCCGG	744
BM_gRNA_749	BMgn000168|Gene013911.1	Bm_scaf43 2 9 3302758 3304136 + 2082 3302738 3304156 Warning:CutE3304830	-	4	0	FASTA:660-682	CTGATAATCTGTATTGCTTCTGG	662
BM_gRNA_750	BMgn000169|Gene013912.0	Bm_scaf43 1 0 3310992 3311735 + 1116 3310972 3311755 Warning:CutE3312107	-	6	0	FASTA:307-329	TTTATCTAGGATCGCGCACAAGG	309
BM_gRNA_751	BMgn000169|Gene013912.0	Bm_scaf43 1 0 3310992 3311735 + 1116 3310972 3311755 Warning:CutE3312107	+	6	0	FASTA:431-453	GAATCTAAGCGTCCGTCGTATGG	450
BM_gRNA_752	BMgn000169|Gene013912.0	Bm_scaf43 1 0 3310992 3311735 + 1116 3310972 3311755 Warning:CutE3312107	+	6	0	FASTA:464-486	CTTCCAGATCAGGATGTTCCTGG	483
BM_gRNA_753	BMgn000169|Gene013912.0	Bm_scaf43 1 0 3310992 3311735 + 1116 3310972 3311755 Warning:CutE3312107	+	6	0	FASTA:537-559	AGGTCAGAAGTCGGCAGCCTTGG	556
BM_gRNA_754	BMgn000169|Gene013912.0	Bm_scaf43 1 0 3310992 3311735 + 1116 3310972 3311755 Warning:CutE3312107	-	6	0	FASTA:642-664	GTACCCCTGTACCCACGTCTGGG	644
BM_gRNA_755	BMgn000170|Gene013913.0	Bm_scaf43 4 0 3357750 3357875 + 483 3357730 3357895	-	5	0	FASTA:26-48	GATACGAGTCGAATATGTTCAGG	28
BM_gRNA_756	BMgn000170|Gene013913.1	Bm_scaf43 4 126 3359653 3359743 + 483 3359633 3359763	-	5	0	FASTA:25-47	CTCTAAGCTGTCCCGTATATCGG	27
BM_gRNA_757	BMgn000170|Gene013913.2	Bm_scaf43 4 217 3360445 3360549 + 483 3360425 3360569 Warning:CutE3360595	-	7	0	FASTA:90-112	GCGGAGCCCCCGGTAGGCGCCGG	92
BM_gRNA_758	BMgn000170|Gene013913.0	Bm_scaf43 4 0 3357750 3357875 + 483 3357730 3357895	+	5	0	FASTA:70-92	AGGACAAGAGGAAATCAGAGCGG	89
BM_gRNA_759	BMgn000170|Gene013913.1	Bm_scaf43 4 126 3359653 3359743 + 483 3359633 3359763	+	5	0	FASTA:84-106	GTCTTCGAGGGTCCCGATCTCGG	103
BM_gRNA_760	BMgn000171|Gene013914.1	Bm_scaf43 3 122 3388605 3388730 + 376 3388585 3388750	-	6	0	FASTA:79-101	CGCCAACCAGGGCGGTCTTGAGG	81
BM_gRNA_761	BMgn000171|Gene013914.1	Bm_scaf43 3 122 3388605 3388730 + 376 3388585 3388750	+	5	0	FASTA:44-66	GCTGTTCCTTTGTATCGCACTGG	63
BM_gRNA_762	BMgn000171|Gene013914.1	Bm_scaf43 3 122 3388605 3388730 + 376 3388585 3388750	-	4	0	FASTA:102-124	TCCGTGAAGATCTGACTGCCCGG	104
BM_gRNA_763	BMgn000171|Gene013914.1	Bm_scaf43 3 122 3388605 3388730 + 376 3388585 3388750	-	5	0	FASTA:90-112	TGACTGCCCGGCGCCAACCAGGG	92
BM_gRNA_764	BMgn000171|Gene013914.1	Bm_scaf43 3 122 3388605 3388730 + 376 3388585 3388750	-	5	0	FASTA:73-95	CCAGGGCGGTCTTGAGGTGGCGG	75
BM_gRNA_765	BMgn000172|Gene016593.0	Bm_scaf615 3 0 28137 28319 - 858 28117 28339	-	5	0	FASTA:129-151	CGCTTTCGGCGTTTTCTTGGTGG	131
BM_gRNA_766	BMgn000172|Gene016593.1	Bm_scaf615 3 183 25488 25876 - 858 25468 25896 Warning:CutS25270	-	6	0	FASTA:67-89	ATCTAGCAATTGCCGTGACCGGG	69
BM_gRNA_767	BMgn000172|Gene016593.0	Bm_scaf615 3 0 28137 28319 - 858 28117 28339	-	4	0	FASTA:87-109	GATGAATCCGAAGAAATATCCGG	89
BM_gRNA_768	BMgn000172|Gene016593.1	Bm_scaf615 3 183 25488 25876 - 858 25468 25896 Warning:CutS25270	-	5	0	FASTA:289-311	ATAGTTTGTTACCACATGAGCGG	291
BM_gRNA_769	BMgn000172|Gene016593.1	Bm_scaf615 3 183 25488 25876 - 858 25468 25896 Warning:CutS25270	-	5	0	FASTA:377-399	GCGGAAACAGCCACGCCAGTCGG	379
BM_gRNA_770	BMgn000173|Gene010058.0	Bm_scaf154 1 0 159614 160398 - 1178 159594 160418 Warning:CutS159221	-	5	0	FASTA:137-159	GACTCGTTAAACTTCCGATACGG	139
BM_gRNA_771	BMgn000173|Gene010058.0	Bm_scaf154 1 0 159614 160398 - 1178 159594 160418 Warning:CutS159221	+	5	0	FASTA:100-122	AACACTGCTTATCAGAATCTTGG	119
BM_gRNA_772	BMgn000173|Gene010058.0	Bm_scaf154 1 0 159614 160398 - 1178 159594 160418 Warning:CutS159221	+	5	0	FASTA:197-219	GGTACCCAGTGATGAACTGCCGG	216
BM_gRNA_773	BMgn000173|Gene010058.0	Bm_scaf154 1 0 159614 160398 - 1178 159594 160418 Warning:CutS159221	+	5	0	FASTA:272-294	TATCACAGTGGAAGTATCCAAGG	291
BM_gRNA_774	BMgn000173|Gene010058.0	Bm_scaf154 1 0 159614 160398 - 1178 159594 160418 Warning:CutS159221	-	5	0	FASTA:562-584	TCGCTGACAGTATCTCTGAGGGG	564
BM_gRNA_775	BMgn000174|Gene010055.1	Bm_scaf154 8 19 124421 124867 - 1722 124401 124887	-	5	0	FASTA:109-131	GTGGATCCGTTTGCGGTGTAGGG	111
BM_gRNA_776	BMgn000174|Gene010055.2	Bm_scaf154 8 466 123898 124004 - 1722 123878 124024	+	4	0	FASTA:24-46	CTAAGGAAAAATCAGTGCCAAGG	43
BM_gRNA_777	BMgn000174|Gene010055.1	Bm_scaf154 8 19 124421 124867 - 1722 124401 124887	-	5	0	FASTA:182-204	AAGTACTTGTCTATTATGGAGGG	184
BM_gRNA_778	BMgn000174|Gene010055.2	Bm_scaf154 8 466 123898 124004 - 1722 123878 124024	+	4	0	FASTA:89-111	GATTCAGATCAACAAAGTGTTGG	108
BM_gRNA_779	BMgn000174|Gene010055.1	Bm_scaf154 8 19 124421 124867 - 1722 124401 124887	-	5	0	FASTA:287-309	GACGAGGACACTTCCTTTGGAGG	289
BM_gRNA_780	BMgn000175|Gene010054.0	Bm_scaf154 10 0 108201 108299 - 1368 108181 108319	+	6	0	FASTA:32-54	CAAATCGGCGACTAGCACCAAGG	51
BM_gRNA_781	BMgn000175|Gene010054.1	Bm_scaf154 10 99 106941 107062 - 1368 106921 107082	+	6	0	FASTA:21-43	GAAATGGAAACGGGCGCAGACGG	40
BM_gRNA_782	BMgn000175|Gene010054.2	Bm_scaf154 10 221 104543 104705 - 1368 104523 104725	+	4	0	FASTA:135-157	CGTCTACAAGTTCTCCGAGAAGG	154
BM_gRNA_783	BMgn000175|Gene010054.0	Bm_scaf154 10 0 108201 108299 - 1368 108181 108319	+	4	0	FASTA:80-102	GAATGAACTGTCGAAGATCAAGG	99
BM_gRNA_784	BMgn000175|Gene010054.1	Bm_scaf154 10 99 106941 107062 - 1368 106921 107082	-	4	0	FASTA:68-90	TGTCTTTAGAATGTTTCACGTGG	70
BM_gRNA_785	BMgn000176|Gene010053.1	Bm_scaf154 7 66 88400 88586 - 888 88380 88606	-	6	0	FASTA:157-179	CTGCGTGAGTAGCGCGATGTGGG	159
BM_gRNA_786	BMgn000176|Gene010053.1	Bm_scaf154 7 66 88400 88586 - 888 88380 88606	-	5	0	FASTA:24-46	GTCAGCGGGGACATGAACGACGG	26
BM_gRNA_787	BMgn000176|Gene010053.1	Bm_scaf154 7 66 88400 88586 - 888 88380 88606	+	5	0	FASTA:66-88	GCGGGCGCGTGCCCGGCGCTGGG	85
BM_gRNA_788	BMgn000176|Gene010053.1	Bm_scaf154 7 66 88400 88586 - 888 88380 88606	-	5	0	FASTA:133-155	GCCGCCGTCGTAGCGCAGGTCGG	135
BM_gRNA_789	BMgn000176|Gene010053.1	Bm_scaf154 7 66 88400 88586 - 888 88380 88606	+	5	0	FASTA:179-201	GATCAACCTCATGAAGCTGAAGG	198
BM_gRNA_790	BMgn000177|Gene010050.1	Bm_scaf154 2 579 15253 15464 - 1187 15233 15484 Warning:CutS14857	-	6	0	FASTA:128-150	TGATCTTTGCATAGTGCAGTGGG	130
BM_gRNA_791	BMgn000177|Gene010050.1	Bm_scaf154 2 579 15253 15464 - 1187 15233 15484 Warning:CutS14857	-	4	0	FASTA:165-187	TCTCCTAGTTTAAAATCCATTGG	167
BM_gRNA_792	BMgn000177|Gene010050.1	Bm_scaf154 2 579 15253 15464 - 1187 15233 15484 Warning:CutS14857	+	5	1	FASTA:132-154	CTGCACTATGCAAAGATCATGGG	151
BM_gRNA_793	BMgn000177|Gene010050.1	Bm_scaf154 2 579 15253 15464 - 1187 15233 15484 Warning:CutS14857	+	4	0	FASTA:162-184	AAGCCAATGGATTTTAAACTAGG	181
BM_gRNA_794	BMgn000177|Gene010050.1	Bm_scaf154 2 579 15253 15464 - 1187 15233 15484 Warning:CutS14857	-	4	0	FASTA:129-151	ATGATCTTTGCATAGTGCAGTGG	131
BM_gRNA_795	BMgn000178|Gene010049.0	Bm_scaf154 5 0 1221 1395 + 1365 1201 1415	-	4	0	FASTA:116-138	GATCCCGAGCACGCACACACCGG	118
BM_gRNA_796	BMgn000178|Gene010049.1	Bm_scaf154 5 175 5702 5813 + 1365 5682 5833	+	6	0	FASTA:28-50	TCGCCTATCGCGACGCCGAAGGG	47
BM_gRNA_797	BMgn000178|Gene010049.2	Bm_scaf154 5 287 7384 7509 + 1365 7364 7529	+	6	0	FASTA:86-108	GAAAACGCCAAGCAGCTCGTCGG	105
BM_gRNA_798	BMgn000178|Gene010049.1	Bm_scaf154 5 175 5702 5813 + 1365 5682 5833	-	5	0	FASTA:74-96	CTTTGGTGCAGAATAACTTCAGG	76
BM_gRNA_799	BMgn000178|Gene010049.2	Bm_scaf154 5 287 7384 7509 + 1365 7364 7529	-	5	0	FASTA:56-78	GCCAAAGTGAATCCGATACTGGG	58
BM_gRNA_800	BMgn000179|Gene010051.4	Bm_scaf154 6 775 74475 74619 + 2483 74455 74639	+	5	0	FASTA:37-59	TGTTGGAAGCGAACAGCGCGAGG	56
BM_gRNA_801	BMgn000179|Gene010051.4	Bm_scaf154 6 775 74475 74619 + 2483 74455 74639	+	5	0	FASTA:91-113	GACCAAACTCATCAGAGCCACGG	110
BM_gRNA_802	BMgn000179|Gene010051.4	Bm_scaf154 6 775 74475 74619 + 2483 74455 74639	-	4	1	FASTA:114-136	CTTGTCCTGTTCGTTTTCCCTGG	116
BM_gRNA_803	BMgn000179|Gene010051.4	Bm_scaf154 6 775 74475 74619 + 2483 74455 74639	+	4	0	FASTA:20-42	GTATCTCGAGGAGTGATTGTTGG	39
BM_gRNA_804	BMgn000179|Gene010051.4	Bm_scaf154 6 775 74475 74619 + 2483 74455 74639	-	4	0	FASTA:108-130	CTGTTCGTTTTCCCTGGCCGTGG	110
BM_gRNA_805	BMgn000180|Gene010056.1	Bm_scaf154 13 55 135029 135280 + 2922 135009 135300	-	6	0	FASTA:73-95	GGAATCCATGCCTCGGATCCGGG	75
BM_gRNA_806	BMgn000180|Gene010056.2	Bm_scaf154 13 307 138187 138381 + 2922 138167 138401	-	5	0	FASTA:118-140	CATTCTTCGAATCGTGCATCAGG	120
BM_gRNA_807	BMgn000180|Gene010056.1	Bm_scaf154 13 55 135029 135280 + 2922 135009 135300	+	5	0	FASTA:95-117	CTATACACGTACGGCCCGAGGGG	114
BM_gRNA_808	BMgn000180|Gene010056.2	Bm_scaf154 13 307 138187 138381 + 2922 138167 138401	+	4	0	FASTA:76-98	GAAGAAGAAAGGTATTTACGTGG	95
BM_gRNA_809	BMgn000180|Gene010056.1	Bm_scaf154 13 55 135029 135280 + 2922 135009 135300	-	5	0	FASTA:142-164	CCAGCTCCGGTATTGTAAACGGG	144
BM_gRNA_810	BMgn000181|Gene010060.0	Bm_scaf154 8 0 285157 285206 + 1239 285137 285226	-	5	0	FASTA:31-53	GTGCTTGTGGAGCGTGAAGGGGG	33
BM_gRNA_811	BMgn000181|Gene010060.1	Bm_scaf154 8 50 287843 288021 + 1239 287823 288041	-	5	0	FASTA:119-141	ACAAGTGTAGCTTCCTGACGCGG	121
BM_gRNA_812	BMgn000181|Gene010060.2	Bm_scaf154 8 229 288100 288245 + 1239 288080 288265	+	5	0	FASTA:50-72	CCGGAAGAATTAGAAGTTGGTGG	69
BM_gRNA_813	BMgn000181|Gene010060.1	Bm_scaf154 8 50 287843 288021 + 1239 287823 288041	-	5	0	FASTA:147-169	CAAGTTCTCCACTTTCAGCTCGG	149
BM_gRNA_814	BMgn000181|Gene010060.2	Bm_scaf154 8 229 288100 288245 + 1239 288080 288265	-	5	0	FASTA:113-135	TTGTGCCACGTGAACTGTATTGG	115
BM_gRNA_815	BMgn000182|Gene016633.0	Bm_scaf776 5 0 1766 2184 + 1425 1746 2204	-	5	0	FASTA:377-399	CACCGGACATGCAAGCTGTCTGG	379
BM_gRNA_816	BMgn000182|Gene016633.2	Bm_scaf776 5 827 4536 4658 + 1425 4516 4678 Warning:CutE4785	-	4	0	FASTA:31-53	CTATCCATCATGTCTTCTGTTGG	33
BM_gRNA_817	BMgn000182|Gene016633.0	Bm_scaf776 5 0 1766 2184 + 1425 1746 2204	-	4	0	FASTA:185-207	CCAGAAATATGATTCCCAAATGG	187
BM_gRNA_818	BMgn000182|Gene016633.2	Bm_scaf776 5 827 4536 4658 + 1425 4516 4678 Warning:CutE4785	+	4	0	FASTA:84-106	TGACGCCCACAAAAACGTCAAGG	103
BM_gRNA_819	BMgn000182|Gene016633.2	Bm_scaf776 5 827 4536 4658 + 1425 4516 4678 Warning:CutE4785	+	4	0	FASTA:114-136	CTTAGACCTGATCAAAGTGCAGG	133
BM_gRNA_820	BMgn000183|Gene001060.0	Bm_scaf202 2 0 72294 72385 - 246 72274 72405	+	5	0	FASTA:47-69	ACTCAAAGTGTCACAATGCACGG	66
BM_gRNA_821	BMgn000183|Gene001060.1	Bm_scaf202 2 92 71408 71479 - 246 71388 71499 Warning:CutS71326	-	4	0	FASTA:29-51	TTCAATTAGTCTTTCCAAGCCGG	31
BM_gRNA_822	BMgn000183|Gene001060.1	Bm_scaf202 2 92 71408 71479 - 246 71388 71499 Warning:CutS71326	+	4	0	FASTA:53-75	AACTACACGGAATATTCTCGAGG	72
BM_gRNA_823	BMgn000183|Gene001060.1	Bm_scaf202 2 92 71408 71479 - 246 71388 71499 Warning:CutS71326	-	4	0	FASTA:78-100	GAACGTCCTGAACGTTGACGTGG	80
BM_gRNA_824	BMgn000183|Gene001060.1	Bm_scaf202 2 92 71408 71479 - 246 71388 71499 Warning:CutS71326	+	4	0	FASTA:40-62	AGACTAATTGAAGAACTACACGG	59
BM_gRNA_825	BMgn000184|Gene001058.0	Bm_scaf202 2 0 48912 49260 - 549 48892 49280	-	6	0	FASTA:112-134	AGGCCAGTCGTATCTGTGCAAGG	114
BM_gRNA_826	BMgn000184|Gene001058.0	Bm_scaf202 2 0 48912 49260 - 549 48892 49280	+	5	0	FASTA:34-56	TCCTCAATTCGAGCTTTAGGAGG	53
BM_gRNA_827	BMgn000184|Gene001058.0	Bm_scaf202 2 0 48912 49260 - 549 48892 49280	-	5	0	FASTA:191-213	CGGTCTGGTTGTCGCAGTTTTGG	193
BM_gRNA_828	BMgn000184|Gene001058.0	Bm_scaf202 2 0 48912 49260 - 549 48892 49280	+	4	0	FASTA:73-95	TCACGATCAATAAAGCAACCAGG	92
BM_gRNA_829	BMgn000184|Gene001058.0	Bm_scaf202 2 0 48912 49260 - 549 48892 49280	-	4	0	FASTA:143-165	TGGTTCTTAGCACTTCGGGCTGG	145
BM_gRNA_830	BMgn000185|Gene001057.1	Bm_scaf202 7 7 24401 24618 + 1890 24381 24638	-	6	0	FASTA:39-61	GCCCTGGACAATCACCAGGGCGG	41
BM_gRNA_831	BMgn000185|Gene001057.2	Bm_scaf202 7 225 27884 28441 + 1890 27864 28461	-	6	0	FASTA:357-379	GACTCGGTTGGAGGTTCCACTGG	359
BM_gRNA_832	BMgn000185|Gene001057.1	Bm_scaf202 7 7 24401 24618 + 1890 24381 24638	-	5	0	FASTA:81-103	GTCTGAGGGCTCGTGCCTTCTGG	83
BM_gRNA_833	BMgn000185|Gene001057.2	Bm_scaf202 7 225 27884 28441 + 1890 27864 28461	-	6	0	FASTA:380-402	GCGCTGGTGGGGCTGGTATGGGG	382
BM_gRNA_834	BMgn000185|Gene001057.1	Bm_scaf202 7 7 24401 24618 + 1890 24381 24638	-	5	0	FASTA:103-125	TGTGGCCTTTCTCAGGACAAAGG	105
BM_gRNA_835	BMgn000186|Gene001061.0	Bm_scaf202 7 0 89094 89413 + 1192 89074 89433	-	5	0	FASTA:257-279	AGTACTGAGTACTTCCACTTCGG	259
BM_gRNA_836	BMgn000186|Gene001061.1	Bm_scaf202 7 320 90684 90835 + 1192 90664 90855	-	5	0	FASTA:62-84	GGTTTGTTCACCCTTTTCGTTGG	64
BM_gRNA_837	BMgn000186|Gene001061.2	Bm_scaf202 7 472 91387 91539 + 1192 91367 91559	-	5	0	FASTA:109-131	AGCCTTCTCAAAGATGGCTTGGG	111
BM_gRNA_838	BMgn000186|Gene001061.0	Bm_scaf202 7 0 89094 89413 + 1192 89074 89433	+	4	0	FASTA:286-308	AAACGTAATATTAAGAATAGGGG	305
BM_gRNA_839	BMgn000186|Gene001061.1	Bm_scaf202 7 320 90684 90835 + 1192 90664 90855	+	4	0	FASTA:89-111	CCAAACATACAGTCTACAGGAGG	108
BM_gRNA_840	BMgn000187|Gene011403.0	Bm_scaf163 1 0 352595 354802 - 3312 352575 354822 Warning:CutS351491	+	6	0	FASTA:1017-1039	TTTGATGAAGCTATCAGGGCTGG	1036
BM_gRNA_841	BMgn000187|Gene011403.0	Bm_scaf163 1 0 352595 354802 - 3312 352575 354822 Warning:CutS351491	-	6	0	FASTA:1065-1087	GCATGCTGGTAGTAAAACCCAGG	1067
BM_gRNA_842	BMgn000187|Gene011403.0	Bm_scaf163 1 0 352595 354802 - 3312 352575 354822 Warning:CutS351491	-	6	0	FASTA:1669-1691	TTGAGAAGAGGATGGCAGGTCGG	1671
BM_gRNA_843	BMgn000187|Gene011403.0	Bm_scaf163 1 0 352595 354802 - 3312 352575 354822 Warning:CutS351491	-	5	0	FASTA:46-68	AATGATCTCCGTAGGGAATTCGG	48
BM_gRNA_844	BMgn000187|Gene011403.0	Bm_scaf163 1 0 352595 354802 - 3312 352575 354822 Warning:CutS351491	+	5	0	FASTA:69-91	CTGAAACCTCTGGCTCTGATAGG	88
BM_gRNA_845	BMgn000188|Gene011401.0	Bm_scaf163 2 0 348146 348433 - 471 348126 348453	-	6	0	FASTA:202-224	CGAATTGTATGACCGCAGTAAGG	204
BM_gRNA_846	BMgn000188|Gene011401.1	Bm_scaf163 2 288 346854 346879 - 471 346834 346899 Warning:CutS346697	-	4	0	FASTA:25-47	CTGGATTAACTTGTAGCCGAAGG	27
BM_gRNA_847	BMgn000188|Gene011401.0	Bm_scaf163 2 0 348146 348433 - 471 348126 348453	+	5	0	FASTA:284-306	ACAGTAAGCTGCTTTGTTCTTGG	303
BM_gRNA_848	BMgn000188|Gene011401.0	Bm_scaf163 2 0 348146 348433 - 471 348126 348453	-	4	0	FASTA:235-257	TAAATGGGAAAGTGCCGACAAGG	237
BM_gRNA_849	BMgn000188|Gene011401.0	Bm_scaf163 2 0 348146 348433 - 471 348126 348453	-	4	0	FASTA:251-273	CCACTTAAGAAAGAATTAAATGG	253
BM_gRNA_850	BMgn000189|Gene011398.1	Bm_scaf163 14 206 314583 314733 - 3305 314563 314753	+	7	0	FASTA:150-172	TGTAGCAGTGGGGCTTGGCAAGG	169
BM_gRNA_851	BMgn000189|Gene011398.2	Bm_scaf163 14 357 314209 314345 - 3305 314189 314365	-	6	0	FASTA:54-76	TCGCTGAAGCAAGCCACTATTGG	56
BM_gRNA_852	BMgn000189|Gene011398.1	Bm_scaf163 14 206 314583 314733 - 3305 314563 314753	+	5	0	FASTA:69-91	ATTGATCAAAGTCTTGGGCCAGG	88
BM_gRNA_853	BMgn000189|Gene011398.2	Bm_scaf163 14 357 314209 314345 - 3305 314189 314365	-	4	0	FASTA:98-120	TGAACAATGCCTCAGCTGCTTGG	100
BM_gRNA_854	BMgn000189|Gene011398.1	Bm_scaf163 14 206 314583 314733 - 3305 314563 314753	+	4	0	FASTA:106-128	ACTAATCCTAATATGAAAAACGG	125
BM_gRNA_855	BMgn000190|Gene011396.0	Bm_scaf163 3 0 199918 199986 - 300 199898 200006	+	6	0	FASTA:45-67	CTGATGAATCTTCCATTGCACGG	64
BM_gRNA_856	BMgn000190|Gene011396.1	Bm_scaf163 3 69 198840 198941 - 300 198820 198961	+	5	0	FASTA:24-46	ATTTTGGTTTCGGGAGTGATAGG	43
BM_gRNA_857	BMgn000190|Gene011396.2	Bm_scaf163 3 171 197903 197931 - 300 197883 197951 Warning:CutS197803	-	6	0	FASTA:21-43	CCAGCGTTCACTACGGCCAGTGG	23
BM_gRNA_858	BMgn000190|Gene011396.0	Bm_scaf163 3 0 199918 199986 - 300 199898 200006	+	5	0	FASTA:68-90	TGCACAGGTTTGGTTGTTTACGG	87
BM_gRNA_859	BMgn000190|Gene011396.1	Bm_scaf163 3 69 198840 198941 - 300 198820 198961	+	5	0	FASTA:46-68	GTGTTCTGCTACTCGTCGCTGGG	65
BM_gRNA_860	BMgn000191|Gene011394.0	Bm_scaf163 2 0 194210 194689 - 774 194190 194709	+	6	0	FASTA:242-264	TTTGCTTGTAACCGCACTGCTGG	261
BM_gRNA_861	BMgn000191|Gene011394.1	Bm_scaf163 2 480 193733 193768 - 774 193713 193788 Warning:CutS193475	+	6	0	FASTA:26-48	CAATTACCTGGTTGCCAGCGTGG	45
BM_gRNA_862	BMgn000191|Gene011394.0	Bm_scaf163 2 0 194210 194689 - 774 194190 194709	-	6	0	FASTA:265-287	TTGAGCCGGCAATAGAACCAGGG	267
BM_gRNA_863	BMgn000191|Gene011394.0	Bm_scaf163 2 0 194210 194689 - 774 194190 194709	+	5	0	FASTA:219-241	GCTTTAGGTGGATGTTCGAGCGG	238
BM_gRNA_864	BMgn000191|Gene011394.0	Bm_scaf163 2 0 194210 194689 - 774 194190 194709	+	5	0	FASTA:296-318	GCCCGAATATTACTTGGGAGTGG	315
BM_gRNA_865	BMgn000192|Gene011393.0	Bm_scaf163 4 0 72651 72719 - 531 72631 72739	-	5	0	FASTA:24-46	TGAATGGTAGCGATGTACCATGG	26
BM_gRNA_866	BMgn000192|Gene011393.1	Bm_scaf163 4 69 72148 72303 - 531 72128 72323	-	5	0	FASTA:33-55	AACCGTATCCACACTGCGCGAGG	35
BM_gRNA_867	BMgn000192|Gene011393.2	Bm_scaf163 4 225 69826 69941 - 531 69806 69961	-	6	0	FASTA:52-74	GAACCAGGACTGCATCGCCAAGG	54
BM_gRNA_868	BMgn000192|Gene011393.0	Bm_scaf163 4 0 72651 72719 - 531 72631 72739	-	5	0	FASTA:65-87	GCCAGGACACGTCGCCCGTCGGG	67
BM_gRNA_869	BMgn000192|Gene011393.1	Bm_scaf163 4 69 72148 72303 - 531 72128 72323	-	5	0	FASTA:89-111	CTTTTGTTAGTCGGAGCCTCGGG	91
BM_gRNA_870	BMgn000193|Gene011392.0	Bm_scaf163 4 0 25651 25741 - 609 25631 25761	-	5	0	FASTA:52-74	GAGCGTGACGCCGAGCGTGACGG	54
BM_gRNA_871	BMgn000193|Gene011392.1	Bm_scaf163 4 91 24549 24775 - 609 24529 24795	+	6	0	FASTA:107-129	GCGTGGCGCGAGCTTTGGCTGGG	126
BM_gRNA_872	BMgn000193|Gene011392.2	Bm_scaf163 4 318 24391 24468 - 609 24371 24488	-	5	0	FASTA:38-60	AGCTGATGATGTGCCAGTCGCGG	40
BM_gRNA_873	BMgn000193|Gene011392.0	Bm_scaf163 4 0 25651 25741 - 609 25631 25761	+	4	0	FASTA:75-97	GCTGCGCTGGTCGCCCGCGCCGG	94
BM_gRNA_874	BMgn000193|Gene011392.1	Bm_scaf163 4 91 24549 24775 - 609 24529 24795	-	6	0	FASTA:222-244	TCGCTCGCCGAGGTTGCGGACGG	224
BM_gRNA_875	BMgn000194|Gene011391.0	Bm_scaf163 1 0 14682 15225 - 816 14662 15245 Warning:CutS14410	-	6	0	FASTA:194-216	TTTGAGCGTCTACATGCAACTGG	196
BM_gRNA_876	BMgn000194|Gene011391.0	Bm_scaf163 1 0 14682 15225 - 816 14662 15245 Warning:CutS14410	-	6	0	FASTA:404-426	ACTCTAGCCCGTTCCCTTTGAGG	406
BM_gRNA_877	BMgn000194|Gene011391.0	Bm_scaf163 1 0 14682 15225 - 816 14662 15245 Warning:CutS14410	+	5	0	FASTA:38-60	TAAGAAACCACGTATAGACCTGG	57
BM_gRNA_878	BMgn000194|Gene011391.0	Bm_scaf163 1 0 14682 15225 - 816 14662 15245 Warning:CutS14410	+	5	0	FASTA:126-148	GTATTTGGGCCCACCACTAAAGG	145
BM_gRNA_879	BMgn000194|Gene011391.0	Bm_scaf163 1 0 14682 15225 - 816 14662 15245 Warning:CutS14410	-	5	0	FASTA:295-317	CTTCTTGATCATGTTTGTGCTGG	297
BM_gRNA_880	BMgn000195|Gene011390.0	Bm_scaf163 1 0 11909 12142 - 351 11889 12162 Warning:CutS11792	+	4	0	FASTA:100-122	CTCTTATGACATGGATGACATGG	119
BM_gRNA_881	BMgn000195|Gene011390.0	Bm_scaf163 1 0 11909 12142 - 351 11889 12162 Warning:CutS11792	+	4	0	FASTA:165-187	ATTTTATGGTATGCAGTTTGTGG	184
BM_gRNA_882	BMgn000195|Gene011390.0	Bm_scaf163 1 0 11909 12142 - 351 11889 12162 Warning:CutS11792	+	3	0	FASTA:139-161	AAGGTGTTGGTGGTATTTTATGG	158
BM_gRNA_883	BMgn000195|Gene011390.0	Bm_scaf163 1 0 11909 12142 - 351 11889 12162 Warning:CutS11792	-	3	0	FASTA:93-115	ATCCATGTCATAAGAGACACCGG	95
BM_gRNA_884	BMgn000195|Gene011390.0	Bm_scaf163 1 0 11909 12142 - 351 11889 12162 Warning:CutS11792	+	4	0	FASTA:102-124	CTTATGACATGGATGACATGGGG	121
BM_gRNA_885	BMgn000196|Gene011389.1	Bm_scaf163 2 52 1600 1899 - 528 1580 1919 Warning:CutS1424	+	5	0	FASTA:143-165	GCTTACGACACTGTGGCGCCAGG	162
BM_gRNA_886	BMgn000196|Gene011389.0	Bm_scaf163 2 0 2176 2227 - 528 2156 2247	+	2	0	FASTA:24-46	GTGTCTCCGCGCATTTCACCTGG	43
BM_gRNA_887	BMgn000196|Gene011389.1	Bm_scaf163 2 52 1600 1899 - 528 1580 1919 Warning:CutS1424	-	3	0	FASTA:194-216	TTGTAGATCTTTATATACAGGGG	196
BM_gRNA_888	BMgn000196|Gene011389.1	Bm_scaf163 2 52 1600 1899 - 528 1580 1919 Warning:CutS1424	+	4	0	FASTA:136-158	AACAGCTGCTTACGACACTGTGG	155
BM_gRNA_889	BMgn000196|Gene011389.1	Bm_scaf163 2 52 1600 1899 - 528 1580 1919 Warning:CutS1424	+	5	0	FASTA:144-166	CTTACGACACTGTGGCGCCAGGG	163
BM_gRNA_890	BMgn000197|Gene011395.0	Bm_scaf163 1 0 195780 196909 + 1696 195760 196929 Warning:CutE197475	-	7	0	FASTA:790-812	CTAAAGAATGCCAAGCCACTTGG	792
BM_gRNA_891	BMgn000197|Gene011395.0	Bm_scaf163 1 0 195780 196909 + 1696 195760 196929 Warning:CutE197475	-	6	0	FASTA:671-693	AGATTGTAGCATGTTGGGGATGG	673
BM_gRNA_892	BMgn000197|Gene011395.0	Bm_scaf163 1 0 195780 196909 + 1696 195760 196929 Warning:CutE197475	+	5	0	FASTA:279-301	GCTATTCAAAGGTGAGTCTGAGG	298
BM_gRNA_893	BMgn000197|Gene011395.0	Bm_scaf163 1 0 195780 196909 + 1696 195760 196929 Warning:CutE197475	+	5	0	FASTA:397-419	CTACTGCAAAACGATTACGATGG	416
BM_gRNA_894	BMgn000197|Gene011395.0	Bm_scaf163 1 0 195780 196909 + 1696 195760 196929 Warning:CutE197475	-	5	0	FASTA:435-457	ACACAGCTTCTACAGCTCGCGGG	437
BM_gRNA_895	BMgn000198|Gene011397.0	Bm_scaf163 5 0 299357 300103 + 1632 299337 300123	+	7	0	FASTA:55-77	GGAGCACGACCAGTGTCCTCGGG	74
BM_gRNA_896	BMgn000198|Gene011397.1	Bm_scaf163 5 747 300334 300561 + 1632 300314 300581	+	6	0	FASTA:35-57	TGAGAATGGTCCTATTGATTGGG	54
BM_gRNA_897	BMgn000198|Gene011397.2	Bm_scaf163 5 975 302648 302760 + 1632 302628 302780 Warning:CutE302953	+	4	0	FASTA:27-49	TTAAAACTGGAGGAGAAATACGG	46
BM_gRNA_898	BMgn000198|Gene011397.0	Bm_scaf163 5 0 299357 300103 + 1632 299337 300123	-	6	0	FASTA:572-594	CAGCCCTTTCATACATGTCTGGG	574
BM_gRNA_899	BMgn000198|Gene011397.1	Bm_scaf163 5 747 300334 300561 + 1632 300314 300581	-	6	0	FASTA:72-94	CCAACACTGAGTTGGCAGTGTGG	74
BM_gRNA_900	BMgn000199|Gene011400.0	Bm_scaf163 10 0 317671 318157 + 2937 317651 318177	+	6	0	FASTA:375-397	GCCTGATGGAGAGGCGCAGCTGG	394
BM_gRNA_901	BMgn000199|Gene011400.0	Bm_scaf163 10 0 317671 318157 + 2937 317651 318177	-	5	0	FASTA:214-236	AGCCTGTCTACTAAAGTCCCGGG	216
BM_gRNA_902	BMgn000199|Gene011400.0	Bm_scaf163 10 0 317671 318157 + 2937 317651 318177	+	5	0	FASTA:247-269	AATCTCAAGGTTTACACAGCGGG	266
BM_gRNA_903	BMgn000199|Gene011400.0	Bm_scaf163 10 0 317671 318157 + 2937 317651 318177	-	5	0	FASTA:305-327	TGGATCACTAGTCACAATCGTGG	307
BM_gRNA_904	BMgn000199|Gene011400.0	Bm_scaf163 10 0 317671 318157 + 2937 317651 318177	-	5	0	FASTA:338-360	CTGACGCTGTAGAGTGATATTGG	340
BM_gRNA_905	BMgn000201|Gene011402.0	Bm_scaf163 1 0 350518 351097 + 871 350498 351117 Warning:CutE351388	-	6	0	FASTA:122-144	GCACCAGGCACAGCATATTCAGG	124
BM_gRNA_906	BMgn000201|Gene011402.0	Bm_scaf163 1 0 350518 351097 + 871 350498 351117 Warning:CutE351388	+	6	0	FASTA:151-173	GCATCGTTTCGAGCCCTACGCGG	170
BM_gRNA_907	BMgn000201|Gene011402.0	Bm_scaf163 1 0 350518 351097 + 871 350498 351117 Warning:CutE351388	-	6	0	FASTA:405-427	CATCTGTGCGACTGCCGGAGTGG	407
BM_gRNA_908	BMgn000201|Gene011402.0	Bm_scaf163 1 0 350518 351097 + 871 350498 351117 Warning:CutE351388	-	6	0	FASTA:474-496	GTCCAAACCCGCCAACACGTTGG	476
BM_gRNA_909	BMgn000201|Gene011402.0	Bm_scaf163 1 0 350518 351097 + 871 350498 351117 Warning:CutE351388	-	6	0	FASTA:529-551	GGCGCGCACAGTGTCCGATAGGG	531
BM_gRNA_910	BMgn000202|Gene016611.0	Bm_scaf675_contig44215 1 0 7976 8249 + 411 7956 8269 Warning:CutE8386	+	6	0	FASTA:180-202	GAATTCTATTCAGCTCTGCCCGG	199
BM_gRNA_911	BMgn000202|Gene016611.0	Bm_scaf675_contig44215 1 0 7976 8249 + 411 7956 8269 Warning:CutE8386	+	5	0	FASTA:38-60	CTTGTTCGTTCTTAACGCGGCGG	57
BM_gRNA_912	BMgn000202|Gene016611.0	Bm_scaf675_contig44215 1 0 7976 8249 + 411 7956 8269 Warning:CutE8386	-	5	0	FASTA:78-100	CAAGGACATTGGATGTCGTTGGG	80
BM_gRNA_913	BMgn000202|Gene016611.0	Bm_scaf675_contig44215 1 0 7976 8249 + 411 7956 8269 Warning:CutE8386	+	5	0	FASTA:112-134	TCAAGGACCGCGAAAATTTATGG	131
BM_gRNA_914	BMgn000202|Gene016611.0	Bm_scaf675_contig44215 1 0 7976 8249 + 411 7956 8269 Warning:CutE8386	-	5	0	FASTA:154-176	GTCTTCATCAGGAACGTCGAGGG	156
BM_gRNA_915	BMgn000203|Gene016518.0	Bm_scaf505_contig43533 4 0 9196 9369 - 477 9176 9389	+	6	0	FASTA:71-93	GGCGCCGGACGTGGTGCGCTCGG	90
BM_gRNA_916	BMgn000203|Gene016518.1	Bm_scaf505_contig43533 4 174 8367 8462 - 477 8347 8482	-	5	0	FASTA:21-43	TCTTCCGGAGACAGCTCTGGTGG	23
BM_gRNA_917	BMgn000203|Gene016518.2	Bm_scaf505_contig43533 4 270 7175 7222 - 477 7155 7242 Warning:CutS7126	-	5	0	FASTA:23-45	GCCGCTTTTCCTCCGGCTGCGGG	25
BM_gRNA_918	BMgn000203|Gene016518.0	Bm_scaf505_contig43533 4 0 9196 9369 - 477 9176 9389	-	5	0	FASTA:148-170	AATGACGATCTTCTGCGGCGCGG	150
BM_gRNA_919	BMgn000203|Gene016518.1	Bm_scaf505_contig43533 4 174 8367 8462 - 477 8347 8482	-	5	0	FASTA:91-113	GCTCTGATCTGCAGACGTACTGG	93
BM_gRNA_920	BMgn000204|Gene016292.1	Bm_scaf283 23 24 34210 34442 - 3120 34190 34462	-	6	0	FASTA:95-117	CGGGGGACTGCGCGCCTGCGGGG	97
BM_gRNA_921	BMgn000204|Gene016292.2	Bm_scaf283 23 257 32915 33038 - 3120 32895 33058	+	6	0	FASTA:27-49	TACGCCGGGAGTCATCACCCGGG	46
BM_gRNA_922	BMgn000204|Gene016292.1	Bm_scaf283 23 24 34210 34442 - 3120 34190 34462	-	6	0	FASTA:167-189	ACTTGTACTTGACCTGGTCGAGG	169
BM_gRNA_923	BMgn000204|Gene016292.2	Bm_scaf283 23 257 32915 33038 - 3120 32895 33058	+	6	0	FASTA:54-76	GAACCTGTTCAAGGGGCATCCGG	73
BM_gRNA_924	BMgn000204|Gene016292.1	Bm_scaf283 23 24 34210 34442 - 3120 34190 34462	-	5	0	FASTA:63-85	ACGCCGCCGCCGGCCTGCGGGGG	65
BM_gRNA_925	BMgn000205|Gene016519.0	Bm_scaf506 3 0 10365 10429 - 2136 10345 10449	+	5	0	FASTA:64-86	CGCAATCACACATGGCGAGTGGG	83
BM_gRNA_926	BMgn000205|Gene016519.1	Bm_scaf506 3 65 9588 9629 - 2136 9568 9649	+	5	0	FASTA:40-62	CTTGAGGTGTGCAAGGCCGCTGG	59
BM_gRNA_927	BMgn000205|Gene016519.2	Bm_scaf506 3 107 7793 9109 - 2136 7773 9129 Warning:CutS7081	-	5	0	FASTA:30-52	GTCTACGTGATCCCTCTGGACGG	32
BM_gRNA_928	BMgn000205|Gene016519.2	Bm_scaf506 3 107 7793 9109 - 2136 7773 9129 Warning:CutS7081	-	5	0	FASTA:67-89	AACAGCTCTTGTAGAACTCTAGG	69
BM_gRNA_929	BMgn000205|Gene016519.2	Bm_scaf506 3 107 7793 9109 - 2136 7773 9129 Warning:CutS7081	-	5	0	FASTA:232-254	TCTTCTGGATTAGCTGTCGACGG	234
BM_gRNA_930	BMgn000206|Gene016323.0	Bm_scaf295 8 0 29349 29401 - 1362 29329 29421	-	5	0	FASTA:25-47	GTTGGTGCACATTCCTCCGTTGG	27
BM_gRNA_931	BMgn000206|Gene016323.1	Bm_scaf295 8 53 28275 28491 - 1362 28255 28511	-	6	0	FASTA:166-188	GCCGCTGTGGGGGCGAAGCCGGG	168
BM_gRNA_932	BMgn000206|Gene016323.2	Bm_scaf295 8 270 27759 27969 - 1362 27739 27989	+	6	0	FASTA:51-73	TTCCAATGCGTGTGCGAAGCGGG	70
BM_gRNA_933	BMgn000206|Gene016323.0	Bm_scaf295 8 0 29349 29401 - 1362 29329 29421	+	4	0	FASTA:48-70	GGAATCTGCAAGAATATAGATGG	67
BM_gRNA_934	BMgn000206|Gene016323.1	Bm_scaf295 8 53 28275 28491 - 1362 28255 28511	+	5	0	FASTA:23-45	TCGAGTGCATCTGCAAGCCCGGG	42
BM_gRNA_935	BMgn000207|Gene016326.0	Bm_scaf295 9 0 22170 22287 - 1707 22150 22307	+	7	0	FASTA:71-93	CGTGTGCTGCTGTTCAGCCCTGG	90
BM_gRNA_936	BMgn000207|Gene016326.1	Bm_scaf295 9 118 21304 21638 - 1707 21284 21658	-	7	0	FASTA:198-220	TCCAACGGTTCCGTTCCCCCAGG	200
BM_gRNA_937	BMgn000207|Gene016326.2	Bm_scaf295 9 453 20896 21046 - 1707 20876 21066	-	6	0	FASTA:118-140	GTACCCAGGACGGCAGTGGCAGG	120
BM_gRNA_938	BMgn000207|Gene016326.0	Bm_scaf295 9 0 22170 22287 - 1707 22150 22307	+	5	0	FASTA:47-69	TCTACCCACCGACGTGCTGCGGG	66
BM_gRNA_939	BMgn000207|Gene016326.1	Bm_scaf295 9 118 21304 21638 - 1707 21284 21658	-	6	0	FASTA:68-90	GGTCTGTCCCACTGGTTCGGCGG	70
BM_gRNA_940	BMgn000208|Gene016327.0	Bm_scaf295 4 0 16365 16509 - 690 16345 16529	-	6	0	FASTA:63-85	TGCCCGTACTGGCACGACTGCGG	65
BM_gRNA_941	BMgn000208|Gene016327.1	Bm_scaf295 4 145 15802 15918 - 690 15782 15938	+	6	0	FASTA:44-66	GGTAAAGTGGATCTGCGCTCCGG	63
BM_gRNA_942	BMgn000208|Gene016327.2	Bm_scaf295 4 262 15377 15480 - 690 15357 15500	-	6	0	FASTA:47-69	TCAGAGCCCGGCTCCGGACACGG	49
BM_gRNA_943	BMgn000208|Gene016327.0	Bm_scaf295 4 0 16365 16509 - 690 16345 16529	-	5	0	FASTA:24-46	ACGTCCGTGCAGTTGAAGCCGGG	26
BM_gRNA_944	BMgn000208|Gene016327.1	Bm_scaf295 4 145 15802 15918 - 690 15782 15938	-	5	0	FASTA:111-133	GGAACAGCAACAGGCGGCCATGG	113
BM_gRNA_945	BMgn000209|Gene016324.0	Bm_scaf295 13 0 14301 14590 - 2583 14281 14610	+	6	0	FASTA:92-114	CTGCTCTGTGGGGCACGCCTGGG	111
BM_gRNA_946	BMgn000209|Gene016324.1	Bm_scaf295 13 290 13810 14043 - 2583 13790 14063	-	6	0	FASTA:118-140	CAGCGGCACTCGAAGGCGCCCGG	120
BM_gRNA_947	BMgn000209|Gene016324.2	Bm_scaf295 13 524 13003 13172 - 2583 12983 13192	-	5	0	FASTA:35-57	GTTCTCCCGGAGAGTGTACCCGG	37
BM_gRNA_948	BMgn000209|Gene016324.0	Bm_scaf295 13 0 14301 14590 - 2583 14281 14610	-	6	0	FASTA:120-142	CGCGGGGGACACGCCTCGCACGG	122
BM_gRNA_949	BMgn000209|Gene016324.1	Bm_scaf295 13 290 13810 14043 - 2583 13790 14063	-	6	0	FASTA:163-185	TCCTCGCACTCGTCCAGAGAGGG	165
BM_gRNA_950	BMgn000210|Gene016325.0	Bm_scaf295 5 0 540 580 + 669 520 600	-	5	0	FASTA:28-50	CAAGTCTGCTATCACTTTAACGG	30
BM_gRNA_951	BMgn000210|Gene016325.1	Bm_scaf295 5 41 807 908 + 669 787 928	-	6	0	FASTA:100-122	CCTGCGGAAGTAACTTCGGCGGG	102
BM_gRNA_952	BMgn000210|Gene016325.2	Bm_scaf295 5 143 2026 2140 + 669 2006 2160	-	5	0	FASTA:41-63	GACATTTGATCCCTCTTTAATGG	43
BM_gRNA_953	BMgn000210|Gene016325.1	Bm_scaf295 5 41 807 908 + 669 787 928	+	5	0	FASTA:24-46	GTGCTCCGCGAACTGCAGCGCGG	43
BM_gRNA_954	BMgn000210|Gene016325.2	Bm_scaf295 5 143 2026 2140 + 669 2006 2160	+	5	0	FASTA:86-108	AACAAGGAGAAATCAAGTTCTGG	105
BM_gRNA_955	BMgn000211|Gene016149.0	Bm_scaf220 2 0 56924 57100 - 375 56904 57120	+	6	0	FASTA:54-76	GCGGAACTGAAGAGTGAATCTGG	73
BM_gRNA_956	BMgn000211|Gene016149.1	Bm_scaf220 2 177 55847 55919 - 375 55827 55939 Warning:CutS55722	-	5	0	FASTA:76-98	CGGGTACTGCGTCTTGTCGAAGG	78
BM_gRNA_957	BMgn000211|Gene016149.0	Bm_scaf220 2 0 56924 57100 - 375 56904 57120	+	6	0	FASTA:176-198	CGACGCGGGACGACCGCGCAAGG	195
BM_gRNA_958	BMgn000211|Gene016149.0	Bm_scaf220 2 0 56924 57100 - 375 56904 57120	+	4	0	FASTA:108-130	CATGAGCACGAGCATGCTCACGG	127
BM_gRNA_959	BMgn000211|Gene016149.0	Bm_scaf220 2 0 56924 57100 - 375 56904 57120	+	4	2	FASTA:149-171	TGAGCACGGAGAGCAGCTCGAGG	168
BM_gRNA_960	BMgn000212|Gene016150.0	Bm_scaf220 2 0 25255 25444 - 357 25235 25464	-	5	0	FASTA:27-49	CAGTACTGGTGAGGGGGCTTTGG	29
BM_gRNA_961	BMgn000212|Gene016150.1	Bm_scaf220 2 190 24331 24378 - 357 24311 24398 Warning:CutS24212	-	5	0	FASTA:31-53	CGGGGATGCACTTGAAGAACGGG	33
BM_gRNA_962	BMgn000212|Gene016150.0	Bm_scaf220 2 0 25255 25444 - 357 25235 25464	+	5	0	FASTA:53-75	GGAGGAGACCTCGCTGACGCTGG	72
BM_gRNA_963	BMgn000212|Gene016150.0	Bm_scaf220 2 0 25255 25444 - 357 25235 25464	+	5	0	FASTA:86-108	CAAGAACTGTCTGCTGTGCGAGG	105
BM_gRNA_964	BMgn000212|Gene016150.0	Bm_scaf220 2 0 25255 25444 - 357 25235 25464	-	5	0	FASTA:118-140	GGGCATGGAGCGACACGCGCCGG	120
BM_gRNA_965	BMgn000213|Gene016434.0	Bm_scaf379 3 0 5388 5468 + 279 5368 5488	-	5	0	FASTA:64-86	AGCGGTGGGCACTTCGTACAAGG	66
BM_gRNA_966	BMgn000213|Gene016434.1	Bm_scaf379 3 81 6063 6149 + 279 6043 6169	+	5	0	FASTA:50-72	TACAACAGTCGGTTTGAGTGGGG	69
BM_gRNA_967	BMgn000213|Gene016434.1	Bm_scaf379 3 81 6063 6149 + 279 6043 6169	+	4	0	FASTA:72-94	GTATGCTTTAATGTGACCAGAGG	91
BM_gRNA_968	BMgn000213|Gene016434.0	Bm_scaf379 3 0 5388 5468 + 279 5368 5488	-	4	0	FASTA:46-68	CAAGGCTAACTGCGGCACTTGGG	48
BM_gRNA_969	BMgn000213|Gene016434.0	Bm_scaf379 3 0 5388 5468 + 279 5368 5488	-	5	0	FASTA:79-101	ATCTAAACTGTAATCAGCGGTGG	81
BM_gRNA_970	BMgn000214|Gene016717.0	Bm_scaf1296 1 0 2557 2696 - 210 2537 2716 Warning:CutS2487	+	4	0	FASTA:57-79	GATATTACTAATCTAATCTATGG	76
BM_gRNA_971	BMgn000214|Gene016717.0	Bm_scaf1296 1 0 2557 2696 - 210 2537 2716 Warning:CutS2487	+	4	0	FASTA:63-85	ACTAATCTAATCTATGGTAGCGG	82
BM_gRNA_972	BMgn000215|Gene016356.1	Bm_scaf309 11 122 23825 23982 - 2470 23805 24002	+	5	0	FASTA:31-53	TATCCAAGAAGACGGACGTTCGG	50
BM_gRNA_973	BMgn000215|Gene016356.2	Bm_scaf309 11 280 14930 15080 - 2470 14910 15100	+	6	0	FASTA:103-125	AAACCCGAGCTGTCTGGTCCAGG	122
BM_gRNA_974	BMgn000215|Gene016356.1	Bm_scaf309 11 122 23825 23982 - 2470 23805 24002	-	5	0	FASTA:72-94	ATCTTGAAATCGAGTGCGAAAGG	74
BM_gRNA_975	BMgn000215|Gene016356.2	Bm_scaf309 11 280 14930 15080 - 2470 14910 15100	+	4	0	FASTA:21-43	AGAATGGAAAGAGAAGGTAGAGG	40
BM_gRNA_976	BMgn000215|Gene016356.1	Bm_scaf309 11 122 23825 23982 - 2470 23805 24002	-	5	0	FASTA:144-166	GGCCCAACTTCCTTCACGATCGG	146
BM_gRNA_977	BMgn000216|Gene016630.0	Bm_scaf767 2 0 6704 7037 - 501 6684 7057 Warning:CutS6633	+	5	0	FASTA:32-54	CTTGGAAAGCCGGTTTCCTAAGG	51
BM_gRNA_978	BMgn000216|Gene016630.0	Bm_scaf767 2 0 6704 7037 - 501 6684 7057 Warning:CutS6633	+	5	0	FASTA:56-78	CCCAAAATACGTTACACTTCTGG	75
BM_gRNA_979	BMgn000216|Gene016630.0	Bm_scaf767 2 0 6704 7037 - 501 6684 7057 Warning:CutS6633	-	5	0	FASTA:230-252	GCTGTCGTGACATCATACTTGGG	232
BM_gRNA_980	BMgn000216|Gene016630.0	Bm_scaf767 2 0 6704 7037 - 501 6684 7057 Warning:CutS6633	-	5	0	FASTA:252-274	TAGCTTTCATATGGAAAACGTGG	254
BM_gRNA_981	BMgn000216|Gene016630.0	Bm_scaf767 2 0 6704 7037 - 501 6684 7057 Warning:CutS6633	-	4	0	FASTA:81-103	TCACTTATTTGATAAGCTCCAGG	83
BM_gRNA_982	BMgn000217|Gene012389.0	Bm_scaf18 1 0 5791042 5791593 - 828 5791022 5791613 Warning:CutS5790766	-	6	0	FASTA:27-49	AACATAATGCCTTCCAGGCTAGG	29
BM_gRNA_983	BMgn000217|Gene012389.0	Bm_scaf18 1 0 5791042 5791593 - 828 5791022 5791613 Warning:CutS5790766	-	6	0	FASTA:81-103	TTTTGCGGTTCCGCCAACAGTGG	83
BM_gRNA_984	BMgn000217|Gene012389.0	Bm_scaf18 1 0 5791042 5791593 - 828 5791022 5791613 Warning:CutS5790766	-	6	0	FASTA:108-130	GGTACGCGCGGAACCACCACCGG	110
BM_gRNA_985	BMgn000217|Gene012389.0	Bm_scaf18 1 0 5791042 5791593 - 828 5791022 5791613 Warning:CutS5790766	-	6	0	FASTA:134-156	GCCGGTGTGGGCCAATGTCGCGG	136
BM_gRNA_986	BMgn000217|Gene012389.0	Bm_scaf18 1 0 5791042 5791593 - 828 5791022 5791613 Warning:CutS5790766	-	6	0	FASTA:162-184	TCGGGCAGGTTTCTCGGCGCCGG	164
BM_gRNA_987	BMgn000218|Gene012391.0	Bm_scaf18 2 0 5740824 5741351 - 792 5740804 5741371 Warning:CutS5740766	-	3	0	FASTA:330-352	CTGAAATGTCGACATCTTCGTGG	332
BM_gRNA_988	BMgn000218|Gene012391.0	Bm_scaf18 2 0 5740824 5741351 - 792 5740804 5741371 Warning:CutS5740766	+	3	0	FASTA:390-412	ACATCTAAAATTTGCACTGACGG	409
BM_gRNA_989	BMgn000218|Gene012391.0	Bm_scaf18 2 0 5740824 5741351 - 792 5740804 5741371 Warning:CutS5740766	+	3	0	FASTA:441-463	AGAATTTGAACTAAACTCTGAGG	460
BM_gRNA_990	BMgn000218|Gene012391.0	Bm_scaf18 2 0 5740824 5741351 - 792 5740804 5741371 Warning:CutS5740766	+	2	0	FASTA:528-550	AATTAAAAACATTATGAAAATGG	547
BM_gRNA_991	BMgn000218|Gene012391.0	Bm_scaf18 2 0 5740824 5741351 - 792 5740804 5741371 Warning:CutS5740766	+	2	0	FASTA:348-370	TTCAGATATTACAGAGCATTCGG	367
BM_gRNA_992	BMgn000219|Gene012394.0	Bm_scaf18 6 0 5696164 5696540 - 1730 5696144 5696560	+	5	0	FASTA:325-347	GACTTAGTGAGATTGGACAATGG	344
BM_gRNA_993	BMgn000219|Gene012394.1	Bm_scaf18 6 377 5695864 5695985 - 1730 5695844 5696005	+	6	0	FASTA:23-45	GATGAAAACAACTCGGACTCTGG	42
BM_gRNA_994	BMgn000219|Gene012394.2	Bm_scaf18 6 499 5694748 5694960 - 1730 5694728 5694980	+	6	0	FASTA:29-51	AGATGCAAGGGAATGTGTTCAGG	48
BM_gRNA_995	BMgn000219|Gene012394.1	Bm_scaf18 6 377 5695864 5695985 - 1730 5695844 5696005	+	5	0	FASTA:55-77	CAATGCACCGCTAAGAGAACAGG	74
BM_gRNA_996	BMgn000219|Gene012394.2	Bm_scaf18 6 499 5694748 5694960 - 1730 5694728 5694980	+	5	0	FASTA:113-135	AAAACGCAAGACCATCAACGGGG	132
BM_gRNA_997	BMgn000220|Gene012396.0	Bm_scaf18 14 0 5631615 5631736 - 2472 5631595 5631756	+	6	0	FASTA:113-135	GATAGGCAGCGGCATGAAACCGG	132
BM_gRNA_998	BMgn000220|Gene012396.1	Bm_scaf18 14 122 5631053 5631200 - 2472 5631033 5631220	+	6	0	FASTA:119-141	ATCGATCGGATCCTGACTTTCGG	138
BM_gRNA_999	BMgn000220|Gene012396.2	Bm_scaf18 14 270 5630517 5630704 - 2472 5630497 5630724	+	6	0	FASTA:35-57	GCCACTGGTAGCAATGCACCAGG	54
BM_gRNA_1000	BMgn000220|Gene012396.0	Bm_scaf18 14 0 5631615 5631736 - 2472 5631595 5631756	-	5	0	FASTA:63-85	CTTTGCGAGCCGTTGTGATTCGG	65
BM_gRNA_1001	BMgn000220|Gene012396.1	Bm_scaf18 14 122 5631053 5631200 - 2472 5631033 5631220	+	5	0	FASTA:40-62	GGAGTTCGGGAAACGTCTTCAGG	59
BM_gRNA_1002	BMgn000221|Gene012398.0	Bm_scaf18 2 0 5600875 5601315 - 2023 5600855 5601335	-	4	0	FASTA:379-401	ATGAATAACCGTTGGGGTTTTGG	381
BM_gRNA_1003	BMgn000221|Gene012398.1	Bm_scaf18 2 441 5599771 5600677 - 2023 5599751 5600697 Warning:CutS5599096	-	5	0	FASTA:198-220	TGCCAGTCATCAAATAACTTAGG	200
BM_gRNA_1004	BMgn000221|Gene012398.0	Bm_scaf18 2 0 5600875 5601315 - 2023 5600855 5601335	-	4	0	FASTA:439-461	TTCATTTATAGCATTGCGAAGGG	441
BM_gRNA_1005	BMgn000221|Gene012398.1	Bm_scaf18 2 441 5599771 5600677 - 2023 5599751 5600697 Warning:CutS5599096	+	5	0	FASTA:285-307	GAAGACATTGCTGAGAAGAAAGG	304
BM_gRNA_1006	BMgn000221|Gene012398.1	Bm_scaf18 2 441 5599771 5600677 - 2023 5599751 5600697 Warning:CutS5599096	-	5	0	FASTA:669-691	GGACTGAGTACTGTTGTGCTTGG	671
BM_gRNA_1007	BMgn000222|Gene012400.0	Bm_scaf18 12 0 5556160 5556253 - 1701 5556140 5556273	-	5	0	FASTA:86-108	AACCTACAGCAAGGTCAATGGGG	88
BM_gRNA_1008	BMgn000222|Gene012400.2	Bm_scaf18 12 292 5542446 5542556 - 1701 5542426 5542576	+	5	0	FASTA:39-61	CGGAATGCAGTGCAGTATTGAGG	58
BM_gRNA_1009	BMgn000222|Gene012400.0	Bm_scaf18 12 0 5556160 5556253 - 1701 5556140 5556273	-	4	0	FASTA:49-71	TGTGGTAAGCATTTGTACGTGGG	51
BM_gRNA_1010	BMgn000222|Gene012400.2	Bm_scaf18 12 292 5542446 5542556 - 1701 5542426 5542576	-	5	0	FASTA:62-84	ATAGAGCACGCGGCTGCTCGCGG	64
BM_gRNA_1011	BMgn000222|Gene012400.0	Bm_scaf18 12 0 5556160 5556253 - 1701 5556140 5556273	-	4	0	FASTA:67-89	GGGGTTAAATACACGTTTTGTGG	69
BM_gRNA_1012	BMgn000223|Gene012402.1	Bm_scaf18 11 63 5478788 5479035 - 3358 5478768 5479055	+	6	0	FASTA:95-117	AGCCTGGGAAAGAAGGCCGAGGG	114
BM_gRNA_1013	BMgn000223|Gene012402.1	Bm_scaf18 11 63 5478788 5479035 - 3358 5478768 5479055	-	6	0	FASTA:197-219	TTGCAGCTGTGGTAGGGCAACGG	199
BM_gRNA_1014	BMgn000223|Gene012402.1	Bm_scaf18 11 63 5478788 5479035 - 3358 5478768 5479055	+	6	0	FASTA:242-264	TCTCGGAAGACCAGGCCAGTTGG	261
BM_gRNA_1015	BMgn000223|Gene012402.1	Bm_scaf18 11 63 5478788 5479035 - 3358 5478768 5479055	-	5	0	FASTA:140-162	GCCCAAATTAGCCAAAAACGAGG	142
BM_gRNA_1016	BMgn000223|Gene012402.1	Bm_scaf18 11 63 5478788 5479035 - 3358 5478768 5479055	-	4	0	FASTA:164-186	GAAGGCCATTCCTGTGTTGATGG	166
BM_gRNA_1017	BMgn000224|Gene012404.0	Bm_scaf18 7 0 5452983 5453042 - 969 5452963 5453062	-	4	0	FASTA:45-67	CCGACAGCTACAAAAAGATTGGG	47
BM_gRNA_1018	BMgn000224|Gene012404.1	Bm_scaf18 7 60 5451841 5452073 - 969 5451821 5452093	+	5	0	FASTA:119-141	GCCTTACTTTGTGCTGATGAAGG	138
BM_gRNA_1019	BMgn000224|Gene012404.2	Bm_scaf18 7 293 5451356 5451422 - 969 5451336 5451442	+	4	0	FASTA:25-47	TTTGTAGCTATGCAATTTGCTGG	44
BM_gRNA_1020	BMgn000224|Gene012404.1	Bm_scaf18 7 60 5451841 5452073 - 969 5451821 5452093	-	5	0	FASTA:179-201	CAATGTCATAATCTCTCCCTCGG	181
BM_gRNA_1021	BMgn000224|Gene012404.2	Bm_scaf18 7 293 5451356 5451422 - 969 5451336 5451442	-	4	0	FASTA:53-75	GATTGTCCACATCATGAGAATGG	55
BM_gRNA_1022	BMgn000225|Gene012406.2	Bm_scaf18 6 303 5403654 5403754 - 3075 5403634 5403774	+	6	0	FASTA:45-67	AACATACCATGCCGGCTGAACGG	64
BM_gRNA_1023	BMgn000225|Gene012406.2	Bm_scaf18 6 303 5403654 5403754 - 3075 5403634 5403774	-	5	0	FASTA:89-111	CGTTTCTCATCGTGTGTAAAGGG	91
BM_gRNA_1024	BMgn000225|Gene012406.2	Bm_scaf18 6 303 5403654 5403754 - 3075 5403634 5403774	-	4	0	FASTA:25-47	GTTCTTCTTTGATGACGTCTAGG	27
BM_gRNA_1025	BMgn000225|Gene012406.2	Bm_scaf18 6 303 5403654 5403754 - 3075 5403634 5403774	+	5	0	FASTA:99-121	ACGATGAGAAACGCATTGCTGGG	118
BM_gRNA_1026	BMgn000225|Gene012406.2	Bm_scaf18 6 303 5403654 5403754 - 3075 5403634 5403774	+	5	0	FASTA:37-59	CAAAGAAGAACATACCATGCCGG	56
BM_gRNA_1027	BMgn000226|Gene012407.0	Bm_scaf18 7 0 5385922 5386055 - 1197 5385902 5386075	-	5	0	FASTA:86-108	CATTAGCTCTGGACTTGCCTGGG	88
BM_gRNA_1028	BMgn000226|Gene012407.1	Bm_scaf18 7 134 5385576 5385713 - 1197 5385556 5385733	+	5	0	FASTA:55-77	TTAGCACACGGGACAGCTAATGG	74
BM_gRNA_1029	BMgn000226|Gene012407.2	Bm_scaf18 7 272 5385004 5385185 - 1197 5384984 5385205	-	7	0	FASTA:179-201	TTTTACATCGCCCCGGCTATCGG	181
BM_gRNA_1030	BMgn000226|Gene012407.0	Bm_scaf18 7 0 5385922 5386055 - 1197 5385902 5386075	+	4	0	FASTA:117-139	TATAATACAGTGAATACTGACGG	136
BM_gRNA_1031	BMgn000226|Gene012407.1	Bm_scaf18 7 134 5385576 5385713 - 1197 5385556 5385733	+	5	0	FASTA:79-101	GTCGTCGGAGGTCGATTTGGTGG	98
BM_gRNA_1032	BMgn000227|Gene012408.0	Bm_scaf18 1 0 5285254 5285391 - 207 5285234 5285411 Warning:CutS5285185	-	6	0	FASTA:137-159	GGCGAATCGTCTCCTGGTCTTGG	139
BM_gRNA_1033	BMgn000227|Gene012408.0	Bm_scaf18 1 0 5285254 5285391 - 207 5285234 5285411 Warning:CutS5285185	-	5	0	FASTA:39-61	GCCGTCGACTTAGGATAGCAAGG	41
BM_gRNA_1034	BMgn000227|Gene012408.0	Bm_scaf18 1 0 5285254 5285391 - 207 5285234 5285411 Warning:CutS5285185	-	5	0	FASTA:48-70	TAATCCACCGCCGTCGACTTAGG	50
BM_gRNA_1035	BMgn000227|Gene012408.0	Bm_scaf18 1 0 5285254 5285391 - 207 5285234 5285411 Warning:CutS5285185	-	4	0	FASTA:143-165	TAATGGGGCGAATCGTCTCCTGG	145
BM_gRNA_1036	BMgn000227|Gene012408.0	Bm_scaf18 1 0 5285254 5285391 - 207 5285234 5285411 Warning:CutS5285185	-	4	0	FASTA:132-154	ATCGTCTCCTGGTCTTGGTATGG	134
BM_gRNA_1037	BMgn000228|Gene012409.1	Bm_scaf18 4 11 5229031 5229773 - 4482 5229011 5229793	+	6	0	FASTA:246-268	TCAGGACGAGCACAAGACCGCGG	265
BM_gRNA_1038	BMgn000228|Gene012409.2	Bm_scaf18 4 754 5226573 5228806 - 4482 5226553 5228826 Warning:CutS5225400	-	7	0	FASTA:1884-1906	AGCTATATTAGAGGCCGCTGAGG	1886
BM_gRNA_1039	BMgn000228|Gene012409.1	Bm_scaf18 4 11 5229031 5229773 - 4482 5229011 5229793	-	5	0	FASTA:141-163	ATTCTACAGATCGTCTGAATAGG	143
BM_gRNA_1040	BMgn000228|Gene012409.2	Bm_scaf18 4 754 5226573 5228806 - 4482 5226553 5228826 Warning:CutS5225400	+	6	0	FASTA:237-259	CTCAGTCGGTTAGCGGGAGCTGG	256
BM_gRNA_1041	BMgn000228|Gene012409.1	Bm_scaf18 4 11 5229031 5229773 - 4482 5229011 5229793	-	5	0	FASTA:175-197	GAGTTAGATGTAACGCTTTCCGG	177
BM_gRNA_1042	BMgn000229|Gene012410.0	Bm_scaf18 16 0 5212314 5212578 - 2743 5212294 5212598	+	5	0	FASTA:193-215	CTCTATGGACGTTCGAAGCGTGG	212
BM_gRNA_1043	BMgn000229|Gene012410.1	Bm_scaf18 16 265 5212009 5212242 - 2743 5211989 5212262	-	7	0	FASTA:226-248	AAAATCCCAGAATCCCTGCCAGG	228
BM_gRNA_1044	BMgn000229|Gene012410.0	Bm_scaf18 16 0 5212314 5212578 - 2743 5212294 5212598	-	4	0	FASTA:158-180	ATAGCGCTTAACTTATAATCAGG	160
BM_gRNA_1045	BMgn000229|Gene012410.1	Bm_scaf18 16 265 5212009 5212242 - 2743 5211989 5212262	+	6	0	FASTA:66-88	TTTCGTATCATGTATCTGCTGGG	85
BM_gRNA_1046	BMgn000229|Gene012410.0	Bm_scaf18 16 0 5212314 5212578 - 2743 5212294 5212598	-	4	0	FASTA:243-265	TGCTGTTCTGTCTCTTGAAGCGG	245
BM_gRNA_1047	BMgn000231|Gene012414.0	Bm_scaf18 2 0 5171459 5172226 - 1917 5171439 5172246	-	6	0	FASTA:268-290	GAGGGTACCCCACATATACGGGG	270
BM_gRNA_1048	BMgn000231|Gene012414.0	Bm_scaf18 2 0 5171459 5172226 - 1917 5171439 5172246	+	6	0	FASTA:407-429	GATCTCCGTCATCTTCTGCGAGG	426
BM_gRNA_1049	BMgn000231|Gene012414.0	Bm_scaf18 2 0 5171459 5172226 - 1917 5171439 5172246	+	6	0	FASTA:611-633	GGGCTCTGGTGCTGCTCTAGCGG	630
BM_gRNA_1050	BMgn000231|Gene012414.0	Bm_scaf18 2 0 5171459 5172226 - 1917 5171439 5172246	-	5	0	FASTA:495-517	TTGACGGACACACTAGTAAATGG	497
BM_gRNA_1051	BMgn000231|Gene012414.0	Bm_scaf18 2 0 5171459 5172226 - 1917 5171439 5172246	-	5	0	FASTA:649-671	GATGAGGATCTTGACGAACAAGG	651
BM_gRNA_1052	BMgn000232|Gene012417.3	Bm_scaf18 9 335 4936514 4936667 - 1165 4936494 4936687	+	6	0	FASTA:143-165	CGAGGTGCTTCAGGGATCTTGGG	162
BM_gRNA_1053	BMgn000232|Gene012417.3	Bm_scaf18 9 335 4936514 4936667 - 1165 4936494 4936687	-	4	0	FASTA:51-73	CATCAGCTCTTCCTCCTGGACGG	53
BM_gRNA_1054	BMgn000232|Gene012417.3	Bm_scaf18 9 335 4936514 4936667 - 1165 4936494 4936687	-	4	0	FASTA:110-132	AGCAAGCGCAGTTTCTCCAGAGG	112
BM_gRNA_1055	BMgn000232|Gene012417.3	Bm_scaf18 9 335 4936514 4936667 - 1165 4936494 4936687	+	6	1	FASTA:94-116	GACACAAGCTACTGATCCTCTGG	113
BM_gRNA_1056	BMgn000232|Gene012417.3	Bm_scaf18 9 335 4936514 4936667 - 1165 4936494 4936687	+	4	0	FASTA:125-147	CGCTTGCTTTGCTTGTCCCGAGG	144
BM_gRNA_1057	BMgn000233|Gene012423.2	Bm_scaf18 7 277 4872893 4873005 - 3584 4872873 4873025	-	4	0	FASTA:102-124	ACTTCATCGATCATTCCATTCGG	104
BM_gRNA_1058	BMgn000233|Gene012423.3	Bm_scaf18 7 390 4872145 4872308 - 3584 4872125 4872328	-	5	0	FASTA:134-156	AACGAAGTCAGCCAGTTCTCGGG	136
BM_gRNA_1059	BMgn000233|Gene012423.3	Bm_scaf18 7 390 4872145 4872308 - 3584 4872125 4872328	+	4	0	FASTA:48-70	GAATTGTTTCACAACTATGCTGG	67
BM_gRNA_1060	BMgn000233|Gene012423.4	Bm_scaf18 7 554 4871389 4871637 - 3584 4871369 4871657	-	5	0	FASTA:135-157	GGATAAAGTTGGTAAATTGTCGG	137
BM_gRNA_1061	BMgn000233|Gene012423.3	Bm_scaf18 7 390 4872145 4872308 - 3584 4872125 4872328	-	4	0	FASTA:82-104	CGCTCTTTAACTGTAAAGCACGG	84
BM_gRNA_1062	BMgn000234|Gene012428.0	Bm_scaf18 13 0 4759381 4759555 - 4959 4759361 4759575	-	6	0	FASTA:67-89	AGCTCTGCTCCTCTTGGCCCTGG	69
BM_gRNA_1063	BMgn000234|Gene012428.1	Bm_scaf18 13 175 4755056 4755228 - 4959 4755036 4755248	+	6	0	FASTA:131-153	GCCAAGCTGTTTGCAGACAGCGG	150
BM_gRNA_1064	BMgn000234|Gene012428.2	Bm_scaf18 13 348 4753016 4753153 - 4959 4752996 4753173	+	6	0	FASTA:91-113	CTTTGGAGGTATGCGAACAGAGG	110
BM_gRNA_1065	BMgn000234|Gene012428.0	Bm_scaf18 13 0 4759381 4759555 - 4959 4759361 4759575	+	6	0	FASTA:110-132	GGGTAGCACCGTCTGGTTCACGG	129
BM_gRNA_1066	BMgn000234|Gene012428.1	Bm_scaf18 13 175 4755056 4755228 - 4959 4755036 4755248	-	5	0	FASTA:25-47	CTCCATCGAGGCCGTAAGCCGGG	27
BM_gRNA_1067	BMgn000236|Gene012429.0	Bm_scaf18 9 0 4733043 4733202 - 1342 4733023 4733222	-	4	0	FASTA:110-132	ATGCGAGATGCATCGATGACCGG	112
BM_gRNA_1068	BMgn000236|Gene012429.1	Bm_scaf18 9 160 4731842 4731968 - 1342 4731822 4731988	+	5	0	FASTA:32-54	GGTATTCGACTTTGCTCAGAAGG	51
BM_gRNA_1069	BMgn000236|Gene012429.2	Bm_scaf18 9 287 4729651 4729729 - 1342 4729631 4729749	+	6	0	FASTA:26-48	ACCGCAAGTTCCGACTATGGAGG	45
BM_gRNA_1070	BMgn000236|Gene012429.0	Bm_scaf18 9 0 4733043 4733202 - 1342 4733023 4733222	-	4	0	FASTA:136-158	CCAAACACATGATCGTCAATGGG	138
BM_gRNA_1071	BMgn000236|Gene012429.1	Bm_scaf18 9 160 4731842 4731968 - 1342 4731822 4731988	+	4	0	FASTA:108-130	AGGCCATTTTGGAAGAAACTTGG	127
BM_gRNA_1072	BMgn000237|Gene012432.1	Bm_scaf18 13 177 4718926 4719115 - 4168 4718906 4719135	+	5	0	FASTA:61-83	TTTAAAGAGTGTGACTGGAGAGG	80
BM_gRNA_1073	BMgn000237|Gene012432.2	Bm_scaf18 13 367 4713107 4713219 - 4168 4713087 4713239	+	6	0	FASTA:70-92	GTGCCGTCGCTATGAACTGCAGG	89
BM_gRNA_1074	BMgn000237|Gene012432.1	Bm_scaf18 13 177 4718926 4719115 - 4168 4718906 4719135	+	5	0	FASTA:165-187	TGAGTTGCCATGCATTGTCGAGG	184
BM_gRNA_1075	BMgn000237|Gene012432.2	Bm_scaf18 13 367 4713107 4713219 - 4168 4713087 4713239	+	5	0	FASTA:33-55	TCGTCTGACGCGAGTGTCCTCGG	52
BM_gRNA_1076	BMgn000237|Gene012432.1	Bm_scaf18 13 177 4718926 4719115 - 4168 4718906 4719135	+	4	0	FASTA:134-156	AAAATGATAAGCCCACATTCAGG	153
BM_gRNA_1077	BMgn000238|Gene012435.4	Bm_scaf18 11 690 4605601 4605789 - 2405 4605581 4605809	-	4	0	FASTA:23-45	TTAGTGCCCAATATTCCATTTGG	25
BM_gRNA_1078	BMgn000238|Gene012435.2	Bm_scaf18 11 306 4609612 4609799 - 2405 4609592 4609819	+	5	0	FASTA:18-40	CAGTGAATTACGTCGTGACTAGG	37
BM_gRNA_1079	BMgn000238|Gene012435.2	Bm_scaf18 11 306 4609612 4609799 - 2405 4609592 4609819	-	4	0	FASTA:200-222	ACATATTTACTTACTCGACTAGG	202
BM_gRNA_1080	BMgn000238|Gene012435.5	Bm_scaf18 11 879 4537118 4537265 - 2405 4537098 4537285	+	4	0	FASTA:117-139	AGTACGCATATGCGAGCAGATGG	136
BM_gRNA_1081	BMgn000238|Gene012435.4	Bm_scaf18 11 690 4605601 4605789 - 2405 4605581 4605809	+	3	0	FASTA:16-38	TTCAGTACCAAATGGAATATTGG	35
BM_gRNA_1082	BMgn000240|Gene012440.0	Bm_scaf18 4 0 4229719 4229907 - 720 4229699 4229927	-	5	0	FASTA:182-204	GCTAGTTTCGGAGTTTTCGATGG	184
BM_gRNA_1083	BMgn000240|Gene012440.1	Bm_scaf18 4 189 4229126 4229209 - 720 4229106 4229229	+	4	0	FASTA:32-54	TGGAAAGGGGATGTTCGATCAGG	51
BM_gRNA_1084	BMgn000240|Gene012440.2	Bm_scaf18 4 273 4228242 4228435 - 720 4228222 4228455	-	5	0	FASTA:71-93	CTGAGAGACACAACACAGGCAGG	73
BM_gRNA_1085	BMgn000240|Gene012440.1	Bm_scaf18 4 189 4229126 4229209 - 720 4229106 4229229	+	4	0	FASTA:73-95	TGAAACTGTACAGATATTGGAGG	92
BM_gRNA_1086	BMgn000240|Gene012440.2	Bm_scaf18 4 273 4228242 4228435 - 720 4228222 4228455	-	5	0	FASTA:95-117	CCAGAGCCTTTCACAGTGCACGG	97
BM_gRNA_1087	BMgn000241|Gene012442.0	Bm_scaf18 17 0 4209021 4209211 - 2961 4209001 4209231	+	6	0	FASTA:127-149	TCTCTGACTGCGAGTCGGTAAGG	146
BM_gRNA_1088	BMgn000241|Gene012442.1	Bm_scaf18 17 191 4203283 4203438 - 2961 4203263 4203458	+	5	0	FASTA:108-130	TGTTGAAAGCGCGGAGAGAGCGG	127
BM_gRNA_1089	BMgn000241|Gene012442.2	Bm_scaf18 17 347 4194288 4194495 - 2961 4194268 4194515	-	5	0	FASTA:35-57	CGGAGCATTATTCGAGTTGTTGG	37
BM_gRNA_1090	BMgn000241|Gene012442.0	Bm_scaf18 17 0 4209021 4209211 - 2961 4209001 4209231	-	6	0	FASTA:188-210	CGTCGCGCCGACGAAGAGTTCGG	190
BM_gRNA_1091	BMgn000241|Gene012442.1	Bm_scaf18 17 191 4203283 4203438 - 2961 4203263 4203458	+	4	0	FASTA:31-53	CTGGAGTTAGTACCGCGACGAGG	50
BM_gRNA_1092	BMgn000242|Gene012443.0	Bm_scaf18 14 0 4177996 4178207 - 2265 4177976 4178227	-	5	0	FASTA:58-80	GCGACGCAGCTCGCTGATCAGGG	60
BM_gRNA_1093	BMgn000242|Gene012443.1	Bm_scaf18 14 212 4175856 4176012 - 2265 4175836 4176032	+	6	0	FASTA:25-47	ATGGAGAGGGTGTCGACGGAGGG	44
BM_gRNA_1094	BMgn000242|Gene012443.2	Bm_scaf18 14 369 4175178 4175291 - 2265 4175158 4175311	+	5	0	FASTA:29-51	CAAGAACGAAATCGATCGCAAGG	48
BM_gRNA_1095	BMgn000242|Gene012443.0	Bm_scaf18 14 0 4177996 4178207 - 2265 4177976 4178227	-	4	0	FASTA:27-49	AGCAGCGCCCCCACCGCGCCCGG	29
BM_gRNA_1096	BMgn000242|Gene012443.1	Bm_scaf18 14 212 4175856 4176012 - 2265 4175836 4176032	+	6	0	FASTA:108-130	GGACTACAGGGCCGTCATGCAGG	127
BM_gRNA_1097	BMgn000243|Gene012447.0	Bm_scaf18 3 0 3871870 3872291 - 1628 3871850 3872311	-	5	0	FASTA:187-209	CAGCTGTGTCTTGTTGACACAGG	189
BM_gRNA_1098	BMgn000243|Gene012447.2	Bm_scaf18 3 597 3870767 3871254 - 1628 3870747 3871274 Warning:CutS3870224	+	4	0	FASTA:50-72	GATGACACATAAGCAGAGAGTGG	69
BM_gRNA_1099	BMgn000243|Gene012447.0	Bm_scaf18 3 0 3871870 3872291 - 1628 3871850 3872311	-	4	0	FASTA:312-334	GTTCTTCGATCGACATTGGTTGG	314
BM_gRNA_1100	BMgn000243|Gene012447.2	Bm_scaf18 3 597 3870767 3871254 - 1628 3870747 3871274 Warning:CutS3870224	-	4	0	FASTA:89-111	AGTGCTCTGTCAAACTGTCAAGG	91
BM_gRNA_1101	BMgn000243|Gene012447.0	Bm_scaf18 3 0 3871870 3872291 - 1628 3871850 3872311	-	4	0	FASTA:334-356	TTGATATGCAATCTCGGCTTTGG	336
BM_gRNA_1102	BMgn000244|Gene012452.1	Bm_scaf18 9 218 3838906 3840534 - 4309 3838886 3840554	+	8	0	FASTA:326-348	CGCTCCCGCCGGGGCCTATATGG	345
BM_gRNA_1103	BMgn000244|Gene012452.2	Bm_scaf18 9 1847 3837601 3838625 - 4309 3837581 3838645 Warning:CutS3837083	+	6	0	FASTA:41-63	CATGCTACATCCCATGATGCTGG	60
BM_gRNA_1104	BMgn000244|Gene012452.1	Bm_scaf18 9 218 3838906 3840534 - 4309 3838886 3840554	+	6	0	FASTA:359-381	GCAATATGTAATGCCCCAACAGG	378
BM_gRNA_1105	BMgn000244|Gene012452.2	Bm_scaf18 9 1847 3837601 3838625 - 4309 3837581 3838645 Warning:CutS3837083	-	5	0	FASTA:82-104	TTTGAGTGACTTTTCTAAGCAGG	84
BM_gRNA_1106	BMgn000244|Gene012452.1	Bm_scaf18 9 218 3838906 3840534 - 4309 3838886 3840554	-	5	0	FASTA:133-155	TGAAGTACTCGCCGCCATACAGG	135
BM_gRNA_1107	BMgn000245|Gene012462.0	Bm_scaf18 3 0 3598717 3598946 - 497 3598697 3598966	-	6	0	FASTA:134-156	GCCGGAATGCCTTCAGCCGCCGG	136
BM_gRNA_1108	BMgn000245|Gene012462.1	Bm_scaf18 3 230 3597584 3597684 - 497 3597564 3597704 Warning:CutS3597511	-	5	0	FASTA:27-49	CCATAAGCGTATGTGTAGTCCGG	29
BM_gRNA_1109	BMgn000245|Gene012462.0	Bm_scaf18 3 0 3598717 3598946 - 497 3598697 3598966	+	5	0	FASTA:41-63	TTAGCAACTCCAGCCTTCACTGG	60
BM_gRNA_1110	BMgn000245|Gene012462.1	Bm_scaf18 3 230 3597584 3597684 - 497 3597564 3597704 Warning:CutS3597511	-	5	0	FASTA:60-82	TTCTGGAGGTTTCCTGTGTGAGG	62
BM_gRNA_1111	BMgn000245|Gene012462.0	Bm_scaf18 3 0 3598717 3598946 - 497 3598697 3598966	-	5	0	FASTA:81-103	AGGCCCACTGAACCGGTTATAGG	83
BM_gRNA_1112	BMgn000246|Gene012464.0	Bm_scaf18 4 0 3576512 3576741 - 951 3576492 3576761	-	6	0	FASTA:121-143	ATGCATATGACACCCCACCATGG	123
BM_gRNA_1113	BMgn000246|Gene012464.1	Bm_scaf18 4 230 3573724 3573820 - 951 3573704 3573840	-	5	0	FASTA:27-49	CCGTAGTTGAACGCGTACTTTGG	29
BM_gRNA_1114	BMgn000246|Gene012464.2	Bm_scaf18 4 327 3572148 3572260 - 951 3572128 3572280	-	6	0	FASTA:41-63	ACTGTGCGGGTCGTGCCGTCCGG	43
BM_gRNA_1115	BMgn000246|Gene012464.0	Bm_scaf18 4 0 3576512 3576741 - 951 3576492 3576761	-	6	0	FASTA:206-228	ACTGGGGTGTGTGCTACCAGGGG	208
BM_gRNA_1116	BMgn000246|Gene012464.1	Bm_scaf18 4 230 3573724 3573820 - 951 3573704 3573840	+	5	0	FASTA:76-98	TCAAGTCTCAGCAGGAGCAAAGG	95
BM_gRNA_1117	BMgn000247|Gene012465.0	Bm_scaf18 3 0 3564012 3564121 - 490 3563992 3564141	-	7	0	FASTA:64-86	ACAGTGAGCCTAGGCTTCCTTGG	66
BM_gRNA_1118	BMgn000247|Gene012465.1	Bm_scaf18 3 110 3563383 3563557 - 490 3563363 3563577	-	5	0	FASTA:104-126	CTTCCCGTAACAGTCCCATTAGG	106
BM_gRNA_1119	BMgn000247|Gene012465.2	Bm_scaf18 3 285 3562627 3562667 - 490 3562607 3562687 Warning:CutS3562463	-	5	0	FASTA:46-68	GGTGTCTGAGCCTGGACTAGCGG	48
BM_gRNA_1120	BMgn000247|Gene012465.1	Bm_scaf18 3 110 3563383 3563557 - 490 3563363 3563577	+	5	0	FASTA:128-150	TACGGTTATGTTGATGCTGCTGG	147
BM_gRNA_1121	BMgn000247|Gene012465.1	Bm_scaf18 3 110 3563383 3563557 - 490 3563363 3563577	-	5	0	FASTA:155-177	GCCACGTATCTGAACCTTTGTGG	157
BM_gRNA_1122	BMgn000248|Gene012467.0	Bm_scaf18 3 0 3549050 3549224 - 1256 3549030 3549244	-	6	0	FASTA:112-134	GCATGTAGAATAGTGCCCGATGG	114
BM_gRNA_1123	BMgn000248|Gene012467.1	Bm_scaf18 3 175 3542849 3542945 - 1256 3542829 3542965	-	5	0	FASTA:82-104	TCCGTCTCGAGTTTCGTAGTGGG	84
BM_gRNA_1124	BMgn000248|Gene012467.2	Bm_scaf18 3 272 3541120 3541684 - 1256 3541100 3541704 Warning:CutS3540701	+	6	0	FASTA:43-65	CGACGGTTCGATTCGCACCGTGG	62
BM_gRNA_1125	BMgn000248|Gene012467.0	Bm_scaf18 3 0 3549050 3549224 - 1256 3549030 3549244	+	5	0	FASTA:81-103	CTTCCGACCGACAAAACACGTGG	100
BM_gRNA_1126	BMgn000248|Gene012467.1	Bm_scaf18 3 175 3542849 3542945 - 1256 3542829 3542965	+	4	0	FASTA:48-70	GGAGTCAACGATTTTCACACAGG	67
BM_gRNA_1127	BMgn000249|Gene012468.2	Bm_scaf18 4 249 3528808 3529130 - 859 3528788 3529150 Warning:CutS3528696	+	6	0	FASTA:68-90	TATACCGCCGACTCACTCCACGG	87
BM_gRNA_1128	BMgn000249|Gene012468.2	Bm_scaf18 4 249 3528808 3529130 - 859 3528788 3529150 Warning:CutS3528696	-	6	0	FASTA:138-160	AGCAGGTGGTGCAACTCGGGCGG	140
BM_gRNA_1129	BMgn000249|Gene012468.2	Bm_scaf18 4 249 3528808 3529130 - 859 3528788 3529150 Warning:CutS3528696	+	6	0	FASTA:271-293	GCCTGTACCCGTACCAGTAGAGG	290
BM_gRNA_1130	BMgn000249|Gene012468.2	Bm_scaf18 4 249 3528808 3529130 - 859 3528788 3529150 Warning:CutS3528696	+	6	0	FASTA:307-329	TCAGCCAGTGTACCCAACACAGG	326
BM_gRNA_1131	BMgn000249|Gene012468.2	Bm_scaf18 4 249 3528808 3529130 - 859 3528788 3529150 Warning:CutS3528696	-	5	0	FASTA:41-63	ACCGTGCGAACAGAACCGTCTGG	43
BM_gRNA_1132	BMgn000250|Gene012469.1	Bm_scaf18 4 83 3427906 3428064 - 660 3427886 3428084	+	7	0	FASTA:90-112	TCCGGGTACAGCGGAGGACTGGG	109
BM_gRNA_1133	BMgn000250|Gene012469.2	Bm_scaf18 4 242 3427393 3427489 - 660 3427373 3427509	-	5	0	FASTA:22-44	ATCAAAGGCATACTTGGGGTAGG	24
BM_gRNA_1134	BMgn000250|Gene012469.1	Bm_scaf18 4 83 3427906 3428064 - 660 3427886 3428084	-	6	0	FASTA:52-74	GGGAGCGATATACCCGGCGCTGG	54
BM_gRNA_1135	BMgn000250|Gene012469.2	Bm_scaf18 4 242 3427393 3427489 - 660 3427373 3427509	+	5	0	FASTA:48-70	TCAGTGAATGACCCTCATACTGG	67
BM_gRNA_1136	BMgn000250|Gene012469.1	Bm_scaf18 4 83 3427906 3428064 - 660 3427886 3428084	+	5	0	FASTA:114-136	GGCTATAACGCTGGCTACAGCGG	133
BM_gRNA_1137	BMgn000251|Gene012470.0	Bm_scaf18 2 0 3420779 3420875 - 1089 3420759 3420895	+	5	0	FASTA:67-89	CTGGAGACGTGAAAGCAGTGTGG	86
BM_gRNA_1138	BMgn000251|Gene012470.1	Bm_scaf18 2 97 3419689 3420317 - 1089 3419669 3420337 Warning:CutS3419326	+	6	0	FASTA:592-614	TTACAGGCCCCACAAATACGAGG	611
BM_gRNA_1139	BMgn000251|Gene012470.0	Bm_scaf18 2 0 3420779 3420875 - 1089 3420759 3420895	+	4	0	FASTA:32-54	TTATTCGTTCAGCTACGGCGTGG	51
BM_gRNA_1140	BMgn000251|Gene012470.1	Bm_scaf18 2 97 3419689 3420317 - 1089 3419669 3420337 Warning:CutS3419326	-	5	0	FASTA:156-178	GTCTTCGATAAGGCTTCTCCCGG	158
BM_gRNA_1141	BMgn000251|Gene012470.1	Bm_scaf18 2 97 3419689 3420317 - 1089 3419669 3420337 Warning:CutS3419326	-	5	0	FASTA:263-285	TGTTCTCTATGGGAATCCAAAGG	265
BM_gRNA_1142	BMgn000252|Gene012471.3	Bm_scaf18 5 322 3406534 3406700 - 859 3406514 3406720	-	6	0	FASTA:83-105	CGCCATCACGCGCTTCCCACTGG	85
BM_gRNA_1143	BMgn000252|Gene012471.3	Bm_scaf18 5 322 3406534 3406700 - 859 3406514 3406720	-	5	0	FASTA:22-44	GTTAAATTGGTAGCGGGGGTGGG	24
BM_gRNA_1144	BMgn000252|Gene012471.3	Bm_scaf18 5 322 3406534 3406700 - 859 3406514 3406720	-	5	0	FASTA:55-77	CTGATCGCCTGTGTGACCGTCGG	57
BM_gRNA_1145	BMgn000252|Gene012471.3	Bm_scaf18 5 322 3406534 3406700 - 859 3406514 3406720	+	5	0	FASTA:110-132	CGTGAAGGGACAGTACTCTCTGG	129
BM_gRNA_1146	BMgn000252|Gene012471.3	Bm_scaf18 5 322 3406534 3406700 - 859 3406514 3406720	-	5	0	FASTA:138-160	ACAGTACGGACGGTGCCATCAGG	140
BM_gRNA_1147	BMgn000253|Gene012475.0	Bm_scaf18 2 0 3383672 3383850 - 350 3383652 3383870	+	6	0	FASTA:152-174	GGTCACGGGCACGATGGTCATGG	171
BM_gRNA_1148	BMgn000253|Gene012475.0	Bm_scaf18 2 0 3383672 3383850 - 350 3383652 3383870	+	5	0	FASTA:47-69	GCTGTTGCAACTGCGCAGTATGG	66
BM_gRNA_1149	BMgn000253|Gene012475.0	Bm_scaf18 2 0 3383672 3383850 - 350 3383652 3383870	-	5	0	FASTA:88-110	TGTGTTGCGACGAGAAGGCGTGG	90
BM_gRNA_1150	BMgn000253|Gene012475.0	Bm_scaf18 2 0 3383672 3383850 - 350 3383652 3383870	-	5	0	FASTA:127-149	TGACATGCACAACTTGTGCGGGG	129
BM_gRNA_1151	BMgn000253|Gene012475.0	Bm_scaf18 2 0 3383672 3383850 - 350 3383652 3383870	+	5	0	FASTA:104-126	CAACACATCTCGCGGCACGATGG	123
BM_gRNA_1152	BMgn000254|Gene012476.0	Bm_scaf18 2 0 3380328 3380666 - 522 3380308 3380686	-	6	0	FASTA:34-56	ACTAGCTAGGGCGAGGATAGCGG	36
BM_gRNA_1153	BMgn000254|Gene012476.0	Bm_scaf18 2 0 3380328 3380666 - 522 3380308 3380686	-	5	0	FASTA:64-86	ACCATGACCGTGTCCATCTTGGG	66
BM_gRNA_1154	BMgn000254|Gene012476.0	Bm_scaf18 2 0 3380328 3380666 - 522 3380308 3380686	-	5	0	FASTA:302-324	GATGATCTTCCTGATGCCTGTGG	304
BM_gRNA_1155	BMgn000254|Gene012476.0	Bm_scaf18 2 0 3380328 3380666 - 522 3380308 3380686	-	4	0	FASTA:47-69	CTTGGGGTTTAGCACTAGCTAGG	49
BM_gRNA_1156	BMgn000254|Gene012476.0	Bm_scaf18 2 0 3380328 3380666 - 522 3380308 3380686	-	6	0	FASTA:41-63	GTTTAGCACTAGCTAGGGCGAGG	43
BM_gRNA_1157	BMgn000255|Gene012479.0	Bm_scaf18 2 0 3367587 3367715 - 300 3367567 3367735	+	5	0	FASTA:26-48	GGTAGTACTATTCGTTGCTTTGG	45
BM_gRNA_1158	BMgn000255|Gene012479.0	Bm_scaf18 2 0 3367587 3367715 - 300 3367567 3367735	-	5	0	FASTA:61-83	GGAGGAGAACGCATGCTCGGCGG	63
BM_gRNA_1159	BMgn000255|Gene012479.0	Bm_scaf18 2 0 3367587 3367715 - 300 3367567 3367735	-	2	0	FASTA:92-114	CATGGTGTCCATCGTACTTGTGG	94
BM_gRNA_1160	BMgn000255|Gene012479.0	Bm_scaf18 2 0 3367587 3367715 - 300 3367567 3367735	-	2	0	FASTA:110-132	GTCCGTGGTGTACTGGCTCATGG	112
BM_gRNA_1161	BMgn000255|Gene012479.0	Bm_scaf18 2 0 3367587 3367715 - 300 3367567 3367735	+	4	0	FASTA:30-52	GTACTATTCGTTGCTTTGGTGGG	49
BM_gRNA_1162	BMgn000256|Gene012481.0	Bm_scaf18 2 0 3358023 3358151 - 300 3358003 3358171	+	5	0	FASTA:26-48	GGTAGTACTATTCGTTGCTTTGG	45
BM_gRNA_1163	BMgn000256|Gene012481.1	Bm_scaf18 2 129 3357876 3357946 - 300 3357856 3357966 Warning:CutS3357776	-	2	0	FASTA:23-45	ACTCGAACTCGTATTTAGGGTGG	25
BM_gRNA_1164	BMgn000256|Gene012481.0	Bm_scaf18 2 0 3358023 3358151 - 300 3358003 3358171	-	5	0	FASTA:61-83	GGAGGAGAACGCATGCTCGGCGG	63
BM_gRNA_1165	BMgn000256|Gene012481.0	Bm_scaf18 2 0 3358023 3358151 - 300 3358003 3358171	+	4	0	FASTA:30-52	GTACTATTCGTTGCTTTGGTGGG	49
BM_gRNA_1166	BMgn000256|Gene012481.0	Bm_scaf18 2 0 3358023 3358151 - 300 3358003 3358171	+	3	0	FASTA:29-51	AGTACTATTCGTTGCTTTGGTGG	48
BM_gRNA_1167	BMgn000257|Gene012482.0	Bm_scaf18 2 0 3348122 3348251 - 301 3348102 3348271	+	4	0	FASTA:27-49	GATTGTCTTGTTCGTCGCTTTGG	46
BM_gRNA_1168	BMgn000257|Gene012482.0	Bm_scaf18 2 0 3348122 3348251 - 301 3348102 3348271	-	4	0	FASTA:74-96	GTGGATGTGTTGGGAGGAGAAGG	76
BM_gRNA_1169	BMgn000257|Gene012482.0	Bm_scaf18 2 0 3348122 3348251 - 301 3348102 3348271	-	4	0	FASTA:93-115	CATGGTGACCGTCATATTTGTGG	95
BM_gRNA_1170	BMgn000257|Gene012482.0	Bm_scaf18 2 0 3348122 3348251 - 301 3348102 3348271	-	2	0	FASTA:62-84	GGAGGAGAAGGCGTGCTCAGCGG	64
BM_gRNA_1171	BMgn000257|Gene012482.0	Bm_scaf18 2 0 3348122 3348251 - 301 3348102 3348271	-	2	0	FASTA:83-105	GTCATATTTGTGGATGTGTTGGG	85
BM_gRNA_1172	BMgn000258|Gene012483.0	Bm_scaf18 2 0 3339788 3339922 - 306 3339768 3339942	-	5	0	FASTA:29-51	ATGCGACGAACAATACTACCTGG	31
BM_gRNA_1173	BMgn000258|Gene012483.0	Bm_scaf18 2 0 3339788 3339922 - 306 3339768 3339942	-	5	0	FASTA:116-138	GTCCGTGATGTACGGGCTCGTGG	118
BM_gRNA_1174	BMgn000258|Gene012483.0	Bm_scaf18 2 0 3339788 3339922 - 306 3339768 3339942	-	2	0	FASTA:124-146	ATAATGGTGTCCGTGATGTACGG	126
BM_gRNA_1175	BMgn000258|Gene012483.0	Bm_scaf18 2 0 3339788 3339922 - 306 3339768 3339942	+	2	0	FASTA:36-58	GTATTGTTCGTCGCATTGGTCGG	55
BM_gRNA_1176	BMgn000258|Gene012483.0	Bm_scaf18 2 0 3339788 3339922 - 306 3339768 3339942	+	4	0	FASTA:32-54	GGTAGTATTGTTCGTCGCATTGG	51
BM_gRNA_1177	BMgn000259|Gene012487.0	Bm_scaf18 3 0 3324320 3324612 - 641 3324300 3324632	-	5	0	FASTA:60-82	GCCCTCTTGAGGTCTAGCCGTGG	62
BM_gRNA_1178	BMgn000259|Gene012487.0	Bm_scaf18 3 0 3324320 3324612 - 641 3324300 3324632	-	5	0	FASTA:82-104	CGTGGTCGTGTCCATGGCCATGG	84
BM_gRNA_1179	BMgn000259|Gene012487.0	Bm_scaf18 3 0 3324320 3324612 - 641 3324300 3324632	-	4	0	FASTA:217-239	GGTGCAACTCTTCATGATCATGG	219
BM_gRNA_1180	BMgn000259|Gene012487.0	Bm_scaf18 3 0 3324320 3324612 - 641 3324300 3324632	-	3	0	FASTA:88-110	CATGGCCGTGGTCGTGTCCATGG	90
BM_gRNA_1181	BMgn000259|Gene012487.0	Bm_scaf18 3 0 3324320 3324612 - 641 3324300 3324632	+	3	0	FASTA:83-105	CATGGCCATGGACACGACCACGG	102
BM_gRNA_1182	BMgn000260|Gene012489.0	Bm_scaf18 3 0 3317851 3318146 - 533 3317831 3318166	-	5	0	FASTA:88-110	GGCTGTGGTCGTGTCCTCCATGG	90
BM_gRNA_1183	BMgn000260|Gene012489.0	Bm_scaf18 3 0 3317851 3318146 - 533 3317831 3318166	-	5	0	FASTA:220-242	GGTGCAACTCCTCATGATTATGG	222
BM_gRNA_1184	BMgn000260|Gene012489.0	Bm_scaf18 3 0 3317851 3318146 - 533 3317831 3318166	+	3	0	FASTA:74-96	CAAGAGGGCCATGGCCATGGAGG	93
BM_gRNA_1185	BMgn000260|Gene012489.0	Bm_scaf18 3 0 3317851 3318146 - 533 3317831 3318166	-	4	0	FASTA:82-104	GGTCGTGTCCTCCATGGCCATGG	84
BM_gRNA_1186	BMgn000260|Gene012489.0	Bm_scaf18 3 0 3317851 3318146 - 533 3317831 3318166	-	5	0	FASTA:298-320	ATACGTGATAGTCAACGTGGTGG	300
BM_gRNA_1187	BMgn000261|Gene012490.0	Bm_scaf18 1 0 3313148 3313267 - 180 3313128 3313287 Warning:CutS3313088	+	5	0	FASTA:50-72	GTCCGTGGTGTACAGTTTCGTGG	69
BM_gRNA_1188	BMgn000261|Gene012490.0	Bm_scaf18 1 0 3313148 3313267 - 180 3313128 3313287 Warning:CutS3313088	+	4	0	FASTA:78-100	GTCGTGTTTGTGGATATGCTGGG	97
BM_gRNA_1189	BMgn000261|Gene012490.0	Bm_scaf18 1 0 3313148 3313267 - 180 3313128 3313287 Warning:CutS3313088	-	4	0	FASTA:119-141	AGGATTTGTTGGGGTAGCGTTGG	121
BM_gRNA_1190	BMgn000261|Gene012490.0	Bm_scaf18 1 0 3313148 3313267 - 180 3313128 3313287 Warning:CutS3313088	+	4	0	FASTA:35-57	GATGCTCATGTCCGTGTCCGTGG	54
BM_gRNA_1191	BMgn000261|Gene012490.0	Bm_scaf18 1 0 3313148 3313267 - 180 3313128 3313287 Warning:CutS3313088	+	5	0	FASTA:68-90	CGTGGTGTCCGTCGTGTTTGTGG	87
BM_gRNA_1192	BMgn000262|Gene012491.0	Bm_scaf18 2 0 3310369 3310509 - 324 3310349 3310529	-	6	0	FASTA:134-156	AATCGTGATGCTCATGGCCGTGG	136
BM_gRNA_1193	BMgn000262|Gene012491.1	Bm_scaf18 2 141 3310075 3310149 - 324 3310055 3310169 Warning:CutS3309967	-	4	0	FASTA:26-48	TGTACTCAAACTCGTATTTCGGG	28
BM_gRNA_1194	BMgn000262|Gene012491.0	Bm_scaf18 2 0 3310369 3310509 - 324 3310349 3310529	-	5	0	FASTA:40-62	GGCAGCCACTGCGCCGATGACGG	42
BM_gRNA_1195	BMgn000262|Gene012491.0	Bm_scaf18 2 0 3310369 3310509 - 324 3310349 3310529	-	4	0	FASTA:76-98	GTGCTTGTGAATGTGTTGAGAGG	78
BM_gRNA_1196	BMgn000262|Gene012491.0	Bm_scaf18 2 0 3310369 3310509 - 324 3310349 3310529	-	4	0	FASTA:115-137	GTGGTGGTCATGATGATGTACGG	117
BM_gRNA_1197	BMgn000263|Gene012492.0	Bm_scaf18 2 0 3294171 3294581 - 737 3294151 3294601	-	5	0	FASTA:52-74	TTCCGGTAAGAGACCTGCAGTGG	54
BM_gRNA_1198	BMgn000263|Gene012492.1	Bm_scaf18 2 411 3294005 3294084 - 737 3293985 3294104 Warning:CutS3293759	+	5	1	FASTA:32-54	ATACGACTTCGCTTACTCTGTGG	51
BM_gRNA_1199	BMgn000263|Gene012492.0	Bm_scaf18 2 0 3294171 3294581 - 737 3294151 3294601	-	5	0	FASTA:75-97	GCCGCAGCCGACGAGTAATGTGG	77
BM_gRNA_1200	BMgn000263|Gene012492.0	Bm_scaf18 2 0 3294171 3294581 - 737 3294151 3294601	+	5	0	FASTA:300-322	ACCAACTACATCGCCGCCGCTGG	319
BM_gRNA_1201	BMgn000263|Gene012492.0	Bm_scaf18 2 0 3294171 3294581 - 737 3294151 3294601	-	5	0	FASTA:361-383	GATCACTCTGGCTTCAGGAGCGG	363
BM_gRNA_1202	BMgn000264|Gene012497.1	Bm_scaf18 3 53 3264637 3264915 - 677 3264617 3264935	+	6	0	FASTA:35-57	TGCCTTTGTGGCAGTCTCGCAGG	54
BM_gRNA_1203	BMgn000264|Gene012497.2	Bm_scaf18 3 332 3264437 3264555 - 677 3264417 3264575 Warning:CutS3264211	+	5	0	FASTA:96-118	CGCGATGGCGATGTTGTAAAGGG	115
BM_gRNA_1204	BMgn000264|Gene012497.1	Bm_scaf18 3 53 3264637 3264915 - 677 3264617 3264935	-	6	0	FASTA:110-132	GATCATGACGTACGATGCTTTGG	112
BM_gRNA_1205	BMgn000264|Gene012497.1	Bm_scaf18 3 53 3264637 3264915 - 677 3264617 3264935	-	6	0	FASTA:234-256	GCATGGTAGGCAATGGGAGCGGG	236
BM_gRNA_1206	BMgn000264|Gene012497.1	Bm_scaf18 3 53 3264637 3264915 - 677 3264617 3264935	-	5	0	FASTA:159-181	GCAATGGCGAGCTTGGCAACGGG	161
BM_gRNA_1207	BMgn000265|Gene012498.1	Bm_scaf18 3 51 3260096 3260575 - 865 3260076 3260595	-	2	0	FASTA:485-507	TACTTACAATCTCCTCAGCTTGG	487
BM_gRNA_1208	BMgn000266|Gene012499.0	Bm_scaf18 2 0 3255634 3256113 - 735 3255614 3256133	-	2	0	FASTA:485-507	TGCTTACAATTTCCTCAGCTTGG	487
BM_gRNA_1209	BMgn000267|Gene012500.0	Bm_scaf18 2 0 3251388 3251666 - 534 3251368 3251686	-	6	0	FASTA:166-188	GGGAGCAGCAACGGCCAGCTTGG	168
BM_gRNA_1210	BMgn000267|Gene012500.0	Bm_scaf18 2 0 3251388 3251666 - 534 3251368 3251686	-	3	0	FASTA:100-122	GACGATGTTTTGGGAAGAAACGG	102
BM_gRNA_1211	BMgn000267|Gene012500.0	Bm_scaf18 2 0 3251388 3251666 - 534 3251368 3251686	+	2	1	FASTA:152-174	CGCTGCTCCTGTAGCCAAGCTGG	171
BM_gRNA_1212	BMgn000267|Gene012500.0	Bm_scaf18 2 0 3251388 3251666 - 534 3251368 3251686	-	2	0	FASTA:159-181	GCAACGGCCAGCTTGGCTACAGG	161
BM_gRNA_1213	BMgn000267|Gene012500.0	Bm_scaf18 2 0 3251388 3251666 - 534 3251368 3251686	-	2	0	FASTA:284-306	TACTTACAATCTCCTCAGCTTGG	286
BM_gRNA_1214	BMgn000268|Gene012501.0	Bm_scaf18 2 0 3247545 3247778 - 489 3247525 3247798	-	6	0	FASTA:193-215	GGGGGCTTGGTATGCAACGGGGG	195
BM_gRNA_1215	BMgn000268|Gene012501.0	Bm_scaf18 2 0 3247545 3247778 - 489 3247525 3247798	+	5	0	FASTA:47-69	GGTGTCGCAAGCCGGTCTTCTGG	66
BM_gRNA_1216	BMgn000268|Gene012501.0	Bm_scaf18 2 0 3247545 3247778 - 489 3247525 3247798	-	5	0	FASTA:131-153	CGATTCTAGCTGCTTGGGGTTGG	133
BM_gRNA_1217	BMgn000268|Gene012501.0	Bm_scaf18 2 0 3247545 3247778 - 489 3247525 3247798	-	5	0	FASTA:165-187	TGGTAGGCGTTGTATGCGACGGG	167
BM_gRNA_1218	BMgn000268|Gene012501.0	Bm_scaf18 2 0 3247545 3247778 - 489 3247525 3247798	+	4	0	FASTA:23-45	CGTAGTACTTTGTGGATTGGTGG	42
BM_gRNA_1219	BMgn000269|Gene012502.0	Bm_scaf18 2 0 3242149 3242383 - 577 3242129 3242403	-	6	0	FASTA:50-72	GTTCTGGGAAGAGACGGACTCGG	52
BM_gRNA_1220	BMgn000269|Gene012502.1	Bm_scaf18 2 235 3241735 3241883 - 577 3241715 3241903 Warning:CutS3241542	-	4	0	FASTA:157-179	TGCATCAGCGGTGTACTCAACGG	159
BM_gRNA_1221	BMgn000269|Gene012502.0	Bm_scaf18 2 0 3242149 3242383 - 577 3242129 3242403	-	5	0	FASTA:21-43	AATAGTGGACTGGAGCAGCATGG	23
BM_gRNA_1222	BMgn000269|Gene012502.0	Bm_scaf18 2 0 3242149 3242383 - 577 3242129 3242403	-	5	0	FASTA:91-113	GCAGCGTAATTGATAGTCTGGGG	93
BM_gRNA_1223	BMgn000269|Gene012502.0	Bm_scaf18 2 0 3242149 3242383 - 577 3242129 3242403	-	4	0	FASTA:158-180	GTAGGTAACAGGGGCAGGGGCGG	160
BM_gRNA_1224	BMgn000270|Gene012503.0	Bm_scaf18 3 0 3239132 3239282 - 847 3239112 3239302	-	5	0	FASTA:79-101	CCTGCATATGGTCCTTCGTTGGG	81
BM_gRNA_1225	BMgn000270|Gene012503.1	Bm_scaf18 3 151 3238262 3238428 - 847 3238242 3238448	+	6	0	FASTA:133-155	TCGAACCTGATGGTTCGCTGCGG	152
BM_gRNA_1226	BMgn000270|Gene012503.2	Bm_scaf18 3 318 3237721 3237966 - 847 3237701 3237986 Warning:CutS3237438	-	6	0	FASTA:103-125	ATCTTGATGCCATGTCCGATAGG	105
BM_gRNA_1227	BMgn000270|Gene012503.0	Bm_scaf18 3 0 3239132 3239282 - 847 3239112 3239302	-	5	0	FASTA:139-161	TATTTATAGATTGGACTCGGCGG	141
BM_gRNA_1228	BMgn000270|Gene012503.1	Bm_scaf18 3 151 3238262 3238428 - 847 3238242 3238448	+	5	0	FASTA:81-103	ACTCATCGTGAGTCGCGTGACGG	100
BM_gRNA_1229	BMgn000271|Gene012504.1	Bm_scaf18 4 39 3231082 3231585 - 1085 3231062 3231605	-	7	0	FASTA:165-187	TCAGGGGCAGCCTGTGCCACGGG	167
BM_gRNA_1230	BMgn000271|Gene012504.2	Bm_scaf18 4 543 3230835 3231001 - 1085 3230815 3231021	+	7	0	FASTA:137-159	ACCTGATGGTTCATTCCGCAAGG	156
BM_gRNA_1231	BMgn000271|Gene012504.1	Bm_scaf18 4 39 3231082 3231585 - 1085 3231062 3231605	+	6	0	FASTA:39-61	GTTGTGGCCGTAAGCCACGCAGG	58
BM_gRNA_1232	BMgn000271|Gene012504.2	Bm_scaf18 4 543 3230835 3231001 - 1085 3230815 3231021	-	5	0	FASTA:26-48	AGTAAGAGTATCCGTATTTAGGG	28
BM_gRNA_1233	BMgn000271|Gene012504.1	Bm_scaf18 4 39 3231082 3231585 - 1085 3231062 3231605	-	6	0	FASTA:65-87	ATACCGCCGGGCCATGATGTAGG	67
BM_gRNA_1234	BMgn000272|Gene012505.1	Bm_scaf18 4 48 3225445 3225789 - 1018 3225425 3225809	+	6	0	FASTA:53-75	CCAAGGTGGTGTTATAGACGAGG	72
BM_gRNA_1235	BMgn000272|Gene012505.2	Bm_scaf18 4 393 3224155 3224321 - 1018 3224135 3224341	-	5	0	FASTA:24-46	TATGAGAACTCATACTTCGCGGG	26
BM_gRNA_1236	BMgn000272|Gene012505.1	Bm_scaf18 4 48 3225445 3225789 - 1018 3225425 3225809	-	6	0	FASTA:110-132	GATGAGAAGGCTCGTCATGGCGG	112
BM_gRNA_1237	BMgn000272|Gene012505.2	Bm_scaf18 4 393 3224155 3224321 - 1018 3224135 3224341	-	5	0	FASTA:49-71	GCCGGTGTGGGGATCCTCGACGG	51
BM_gRNA_1238	BMgn000272|Gene012505.1	Bm_scaf18 4 48 3225445 3225789 - 1018 3225425 3225809	-	6	0	FASTA:211-233	GGCGGCGTGAACAACAGGACCGG	213
BM_gRNA_1239	BMgn000273|Gene012506.1	Bm_scaf18 4 62 3217613 3217783 - 578 3217593 3217803	-	6	0	FASTA:127-149	GACTGGCGCAACGGCTACTGGGG	129
BM_gRNA_1240	BMgn000273|Gene012506.2	Bm_scaf18 4 233 3214737 3214888 - 578 3214717 3214908 Warning:CutS3214722	+	7	0	FASTA:48-70	TCAGTGTCAGACCCTCATACCGG	67
BM_gRNA_1241	BMgn000273|Gene012506.1	Bm_scaf18 4 62 3217613 3217783 - 578 3217593 3217803	-	5	0	FASTA:32-54	TTGCTAGTGCTACAACGGACAGG	34
BM_gRNA_1242	BMgn000273|Gene012506.2	Bm_scaf18 4 233 3214737 3214888 - 578 3214717 3214908 Warning:CutS3214722	-	6	0	FASTA:74-96	GGGCCTCATGCTGGGTCTTATGG	76
BM_gRNA_1243	BMgn000273|Gene012506.1	Bm_scaf18 4 62 3217613 3217783 - 578 3217593 3217803	-	5	0	FASTA:68-90	CGTATCCGTGGCCTGCTAGTTGG	70
BM_gRNA_1244	BMgn000274|Gene012507.1	Bm_scaf18 4 40 3209043 3209354 - 1243 3209023 3209374	+	5	0	FASTA:84-106	TCTAAAGTATTCGTACAAGGCGG	103
BM_gRNA_1245	BMgn000274|Gene012507.2	Bm_scaf18 4 352 3208883 3208965 - 1243 3208863 3208985	+	5	0	FASTA:82-104	CACAACACGAGCTGAGTGACGGG	101
BM_gRNA_1246	BMgn000274|Gene012507.1	Bm_scaf18 4 40 3209043 3209354 - 1243 3209023 3209374	+	5	0	FASTA:144-166	GCTCCATCAATCGCCGTAGCAGG	163
BM_gRNA_1247	BMgn000274|Gene012507.1	Bm_scaf18 4 40 3209043 3209354 - 1243 3209023 3209374	-	5	0	FASTA:178-200	TACAGGGGCTGCAGATATTTGGG	180
BM_gRNA_1248	BMgn000274|Gene012507.1	Bm_scaf18 4 40 3209043 3209354 - 1243 3209023 3209374	-	5	0	FASTA:213-235	CCACATGGCGCGACTAGATTTGG	215
BM_gRNA_1249	BMgn000275|Gene012508.1	Bm_scaf18 4 41 3186509 3186748 - 626 3186489 3186768	+	4	0	FASTA:23-45	CGTAGCTTTTGGTGCCCTCTTGG	42
BM_gRNA_1250	BMgn000275|Gene012508.1	Bm_scaf18 4 41 3186509 3186748 - 626 3186489 3186768	-	4	0	FASTA:62-84	CAGCATGTCCGTGACTGTAAAGG	64
BM_gRNA_1251	BMgn000275|Gene012508.1	Bm_scaf18 4 41 3186509 3186748 - 626 3186489 3186768	+	4	0	FASTA:213-235	GCTCACTATGCCGCTCCTCTGGG	232
BM_gRNA_1252	BMgn000275|Gene012508.1	Bm_scaf18 4 41 3186509 3186748 - 626 3186489 3186768	-	3	0	FASTA:91-113	ATCATGACGTATGATGCTCTGGG	93
BM_gRNA_1253	BMgn000275|Gene012508.1	Bm_scaf18 4 41 3186509 3186748 - 626 3186489 3186768	-	3	0	FASTA:38-60	CAGCATTGGCTGCAGCCAAGAGG	40
BM_gRNA_1254	BMgn000276|Gene012509.0	Bm_scaf18 3 0 3182574 3182813 - 474 3182554 3182833	-	5	0	FASTA:133-155	GTGCGCTACTGGAGCAGCTTGGG	135
BM_gRNA_1255	BMgn000276|Gene012509.0	Bm_scaf18 3 0 3182574 3182813 - 474 3182554 3182833	-	4	0	FASTA:34-56	ATTAGCTGCAGCCAGGAGTGCGG	36
BM_gRNA_1256	BMgn000276|Gene012509.0	Bm_scaf18 3 0 3182574 3182813 - 474 3182554 3182833	-	4	0	FASTA:62-84	CGGCATGTCCATGACCGTAAAGG	64
BM_gRNA_1257	BMgn000276|Gene012509.0	Bm_scaf18 3 0 3182574 3182813 - 474 3182554 3182833	-	4	0	FASTA:235-257	TTCATGATGACCACTGTAGTGGG	237
BM_gRNA_1258	BMgn000276|Gene012509.0	Bm_scaf18 3 0 3182574 3182813 - 474 3182554 3182833	-	3	0	FASTA:160-182	TGCGTAGTGGGCGATGGGTGCGG	162
BM_gRNA_1259	BMgn000277|Gene012510.1	Bm_scaf18 4 37 3171888 3172127 - 644 3171868 3172147	+	5	0	FASTA:29-51	TTTCGGTGCTTTCTTGGCCGCGG	48
BM_gRNA_1260	BMgn000277|Gene012510.1	Bm_scaf18 4 37 3171888 3172127 - 644 3171868 3172147	-	5	0	FASTA:193-215	GGCAACTGGAGCAGCGTAGTGGG	195
BM_gRNA_1261	BMgn000277|Gene012510.1	Bm_scaf18 4 37 3171888 3172127 - 644 3171868 3172147	-	5	0	FASTA:236-258	ATTCATCGTGACCGGCGTAGTGG	238
BM_gRNA_1262	BMgn000277|Gene012510.1	Bm_scaf18 4 37 3171888 3172127 - 644 3171868 3172147	-	4	0	FASTA:52-74	ATGACCGTAGAGTCCGGCATTGG	54
BM_gRNA_1263	BMgn000277|Gene012510.1	Bm_scaf18 4 37 3171888 3172127 - 644 3171868 3172147	-	3	0	FASTA:215-237	GGGCAACTGGGGAGGCGTAGTGG	217
BM_gRNA_1264	BMgn000278|Gene012511.1	Bm_scaf18 4 50 3166955 3167194 - 663 3166935 3167214	+	5	0	FASTA:29-51	TTTCGGTGCTTTCTTGGCCGCGG	48
BM_gRNA_1265	BMgn000278|Gene012511.1	Bm_scaf18 4 50 3166955 3167194 - 663 3166935 3167214	-	5	0	FASTA:223-245	GGCGTAGTGGGCTACTGGGCCGG	225
BM_gRNA_1266	BMgn000278|Gene012511.1	Bm_scaf18 4 50 3166955 3167194 - 663 3166935 3167214	-	4	0	FASTA:52-74	ATGACCGTAGAGTCCGGCATTGG	54
BM_gRNA_1267	BMgn000278|Gene012511.1	Bm_scaf18 4 50 3166955 3167194 - 663 3166935 3167214	-	2	0	FASTA:184-206	GGCGGCGTAGTGGGCAATAGGGG	186
BM_gRNA_1268	BMgn000278|Gene012511.1	Bm_scaf18 4 50 3166955 3167194 - 663 3166935 3167214	+	2	0	FASTA:204-226	GCCCCAGTTGCCCACTACGCCGG	223
BM_gRNA_1269	BMgn000279|Gene012512.0	Bm_scaf18 2 0 3162202 3162411 - 411 3162182 3162431	-	6	0	FASTA:61-83	ACCGTGACCATGGTAAAGACCGG	63
BM_gRNA_1270	BMgn000279|Gene012512.0	Bm_scaf18 2 0 3162202 3162411 - 411 3162182 3162431	-	6	0	FASTA:188-210	ATTGGCCGGCGTATTCCAGAGGG	190
BM_gRNA_1271	BMgn000279|Gene012512.0	Bm_scaf18 2 0 3162202 3162411 - 411 3162182 3162431	-	5	0	FASTA:94-116	GTGACGTATTATGCTCTGAGAGG	96
BM_gRNA_1272	BMgn000279|Gene012512.0	Bm_scaf18 2 0 3162202 3162411 - 411 3162182 3162431	-	4	0	FASTA:132-154	TCAGGAGCGTAATGAGCTGAGGG	134
BM_gRNA_1273	BMgn000279|Gene012512.0	Bm_scaf18 2 0 3162202 3162411 - 411 3162182 3162431	-	4	0	FASTA:157-179	TTGTTCGAGAGGAACAACATAGG	159
BM_gRNA_1274	BMgn000280|Gene012513.1	Bm_scaf18 4 43 3158637 3158966 - 720 3158617 3158986	-	6	0	FASTA:37-59	GCCCTGGGTGCCAGCCACCATGG	39
BM_gRNA_1275	BMgn000280|Gene012513.2	Bm_scaf18 4 373 3158427 3158533 - 720 3158407 3158553 Warning:CutS3158367	-	5	5	FASTA:49-71	ACCGGTGTGGGGGTCCTCAACGG	51
BM_gRNA_1276	BMgn000280|Gene012513.1	Bm_scaf18 4 43 3158637 3158966 - 720 3158617 3158986	-	6	0	FASTA:71-93	AATCTCCGTGACCGAGGCCGTGG	73
BM_gRNA_1277	BMgn000280|Gene012513.2	Bm_scaf18 4 373 3158427 3158533 - 720 3158407 3158553 Warning:CutS3158367	-	4	0	FASTA:26-48	AGTAAGAGTACTTGTATTTGGGG	28
BM_gRNA_1278	BMgn000280|Gene012513.1	Bm_scaf18 4 43 3158637 3158966 - 720 3158617 3158986	-	6	0	FASTA:161-183	CCAGAGGGGTGGCATGAGCAAGG	163
BM_gRNA_1279	BMgn000281|Gene012514.0	Bm_scaf18 2 0 3150589 3150966 - 919 3150569 3150986	-	7	0	FASTA:245-267	GAGCCGAGGCATAGTGTGCCGGG	247
BM_gRNA_1280	BMgn000281|Gene012514.1	Bm_scaf18 2 378 3150278 3150511 - 919 3150258 3150531 Warning:CutS3149971	+	7	0	FASTA:96-118	CGCGATGGTGGTGCCGTACATGG	115
BM_gRNA_1281	BMgn000281|Gene012514.0	Bm_scaf18 2 0 3150589 3150966 - 919 3150569 3150986	-	6	0	FASTA:356-378	CGTAGCCAAGAGAAGCGGCGTGG	358
BM_gRNA_1282	BMgn000281|Gene012514.1	Bm_scaf18 2 378 3150278 3150511 - 919 3150258 3150531 Warning:CutS3149971	-	5	0	FASTA:28-50	GGAGTAAGCATAGTCGTATTTGG	30
BM_gRNA_1283	BMgn000281|Gene012514.0	Bm_scaf18 2 0 3150589 3150966 - 919 3150569 3150986	-	5	0	FASTA:152-174	CGGCGGCCAACACGGCGCTAAGG	154
BM_gRNA_1284	BMgn000282|Gene012515.2	Bm_scaf18 4 281 3136568 3136714 - 642 3136548 3136734 Warning:CutS3136548	+	6	0	FASTA:140-162	TGACGGTCGCTTCAGGAAAGTGG	159
BM_gRNA_1285	BMgn000282|Gene012515.2	Bm_scaf18 4 281 3136568 3136714 - 642 3136548 3136734 Warning:CutS3136548	-	5	0	FASTA:27-49	GAGTACGCGAATTTGTACTCCGG	29
BM_gRNA_1286	BMgn000282|Gene012515.2	Bm_scaf18 4 281 3136568 3136714 - 642 3136548 3136734 Warning:CutS3136548	+	5	0	FASTA:81-103	TCTCAACATGAGCTCAGACATGG	100
BM_gRNA_1287	BMgn000282|Gene012515.2	Bm_scaf18 4 281 3136568 3136714 - 642 3136548 3136734 Warning:CutS3136548	+	5	0	FASTA:99-121	CATGGCGATGTTGTGAGGGGAGG	118
BM_gRNA_1288	BMgn000282|Gene012515.2	Bm_scaf18 4 281 3136568 3136714 - 642 3136548 3136734 Warning:CutS3136548	+	4	0	FASTA:133-155	TTGAACCTGACGGTCGCTTCAGG	152
BM_gRNA_1289	BMgn000283|Gene012516.1	Bm_scaf18 4 41 3130900 3131019 - 509 3130880 3131039	+	5	0	FASTA:39-61	ATAGCTGTGTGCGTGCTAGGAGG	58
BM_gRNA_1290	BMgn000283|Gene012516.2	Bm_scaf18 4 161 3130432 3130604 - 509 3130412 3130624	+	5	0	FASTA:86-108	AGGACAATCCGAGAACAGAGAGG	105
BM_gRNA_1291	BMgn000283|Gene012516.2	Bm_scaf18 4 161 3130432 3130604 - 509 3130412 3130624	-	5	0	FASTA:144-166	ACGATACGTTTATGACCATCAGG	146
BM_gRNA_1292	BMgn000283|Gene012516.2	Bm_scaf18 4 161 3130432 3130604 - 509 3130412 3130624	+	5	0	FASTA:171-193	TACCATGGGGATAAGAAATCGGG	190
BM_gRNA_1293	BMgn000283|Gene012516.2	Bm_scaf18 4 161 3130432 3130604 - 509 3130412 3130624	+	4	0	FASTA:112-134	ATGAGGTGAAAGGCGAATACTGG	131
BM_gRNA_1294	BMgn000284|Gene012517.3	Bm_scaf18 4 388 3124398 3124507 - 748 3124378 3124527 Warning:CutS3124148	-	6	0	FASTA:110-132	TATCTGACCGCCGGGACCTCTGG	112
BM_gRNA_1295	BMgn000284|Gene012517.3	Bm_scaf18 4 388 3124398 3124507 - 748 3124378 3124527 Warning:CutS3124148	+	5	0	FASTA:94-116	GGTGGCAGAGATTACACCAGAGG	113
BM_gRNA_1296	BMgn000284|Gene012517.3	Bm_scaf18 4 388 3124398 3124507 - 748 3124378 3124527 Warning:CutS3124148	-	5	0	FASTA:118-140	AGGATAATTATCTGACCGCCGGG	120
BM_gRNA_1297	BMgn000284|Gene012517.3	Bm_scaf18 4 388 3124398 3124507 - 748 3124378 3124527 Warning:CutS3124148	+	5	1	FASTA:103-125	GATTACACCAGAGGTCCCGGCGG	122
BM_gRNA_1298	BMgn000284|Gene012517.3	Bm_scaf18 4 388 3124398 3124507 - 748 3124378 3124527 Warning:CutS3124148	+	6	0	FASTA:100-122	AGAGATTACACCAGAGGTCCCGG	119
BM_gRNA_1299	BMgn000285|Gene012521.1	Bm_scaf18 4 52 3095387 3096547 - 2927 3095367 3096567	-	6	0	FASTA:378-400	GCTTGAGCGTATGTTGCTAGGGG	380
BM_gRNA_1300	BMgn000285|Gene012521.2	Bm_scaf18 4 1213 3094026 3094125 - 2927 3094006 3094145	-	5	0	FASTA:40-62	GTCATTGACACCGTATTCAAAGG	42
BM_gRNA_1301	BMgn000285|Gene012521.1	Bm_scaf18 4 52 3095387 3096547 - 2927 3095367 3096567	+	6	0	FASTA:506-528	CGCATCTGGATCTTCAGCGAAGG	525
BM_gRNA_1302	BMgn000285|Gene012521.2	Bm_scaf18 4 1213 3094026 3094125 - 2927 3094006 3094145	+	5	0	FASTA:86-108	ACAAAAGGAAGAACGAGATGGGG	105
BM_gRNA_1303	BMgn000285|Gene012521.1	Bm_scaf18 4 52 3095387 3096547 - 2927 3095367 3096567	-	6	0	FASTA:840-862	GCTCCAGCGTGCTTTACCGTTGG	842
BM_gRNA_1304	BMgn000286|Gene012524.0	Bm_scaf18 4 0 3061834 3061925 - 534 3061814 3061945	+	7	0	FASTA:23-45	GGAATTACAAGAGCCTACCCCGG	42
BM_gRNA_1305	BMgn000286|Gene012524.1	Bm_scaf18 4 92 3061569 3061729 - 534 3061549 3061749	+	5	0	FASTA:93-115	CGAAATAGTCAAAGGCCTAATGG	112
BM_gRNA_1306	BMgn000286|Gene012524.2	Bm_scaf18 4 253 3060737 3060839 - 534 3060717 3060859 Warning:CutS3060706	-	5	0	FASTA:56-78	TTTTGTAAGTCTTGCTGTTGTGG	58
BM_gRNA_1307	BMgn000286|Gene012524.0	Bm_scaf18 4 0 3061834 3061925 - 534 3061814 3061945	+	4	0	FASTA:74-96	ATTAGAACAGTTACAAGATATGG	93
BM_gRNA_1308	BMgn000286|Gene012524.1	Bm_scaf18 4 92 3061569 3061729 - 534 3061549 3061749	-	4	0	FASTA:147-169	TAATAACTTGCAGTCTTTGTTGG	149
BM_gRNA_1309	BMgn000287|Gene012527.0	Bm_scaf18 2 0 3037230 3037846 - 1005 3037210 3037866	-	5	0	FASTA:59-81	TTTTCCAACGATTTTGACGAAGG	61
BM_gRNA_1310	BMgn000287|Gene012527.0	Bm_scaf18 2 0 3037230 3037846 - 1005 3037210 3037866	+	5	0	FASTA:156-178	GATGGAGCTGGCAATGTTCTTGG	175
BM_gRNA_1311	BMgn000287|Gene012527.0	Bm_scaf18 2 0 3037230 3037846 - 1005 3037210 3037866	+	5	0	FASTA:327-349	GTTGCTGTTACTGTTAAACCTGG	346
BM_gRNA_1312	BMgn000287|Gene012527.0	Bm_scaf18 2 0 3037230 3037846 - 1005 3037210 3037866	+	5	0	FASTA:564-586	GAATCATTGGACAATGCCCCAGG	583
BM_gRNA_1313	BMgn000287|Gene012527.0	Bm_scaf18 2 0 3037230 3037846 - 1005 3037210 3037866	-	4	0	FASTA:124-146	ACAACCTGTATCATCACAAGAGG	126
BM_gRNA_1314	BMgn000288|Gene012529.1	Bm_scaf18 11 50 3031799 3031999 - 3894 3031779 3032019	+	6	0	FASTA:200-222	AATATGCCCGGGGAGAACAGTGG	219
BM_gRNA_1315	BMgn000288|Gene012529.2	Bm_scaf18 11 251 3030536 3030631 - 3894 3030516 3030651	+	5	0	FASTA:95-117	AATCCAGAATGTGATATGGAAGG	114
BM_gRNA_1316	BMgn000288|Gene012529.1	Bm_scaf18 11 50 3031799 3031999 - 3894 3031779 3032019	-	5	0	FASTA:68-90	ATTCCATCTGAGTTATCACGGGG	70
BM_gRNA_1317	BMgn000288|Gene012529.2	Bm_scaf18 11 251 3030536 3030631 - 3894 3030516 3030651	+	4	0	FASTA:40-62	ATCAACTCCTGATGAAAAAAAGG	59
BM_gRNA_1318	BMgn000288|Gene012529.1	Bm_scaf18 11 50 3031799 3031999 - 3894 3031779 3032019	-	5	0	FASTA:104-126	TCACGTTTAACTGAAGGTTTAGG	106
BM_gRNA_1319	BMgn000289|Gene012531.1	Bm_scaf18 8 236 3018586 3018728 - 1122 3018566 3018748	-	5	0	FASTA:102-124	TGTACCCAAAAGAACGACCGTGG	104
BM_gRNA_1320	BMgn000289|Gene012531.2	Bm_scaf18 8 379 3017246 3017333 - 1122 3017226 3017353	+	4	0	FASTA:28-50	TCGCCAAAGAGTATCATTATTGG	47
BM_gRNA_1321	BMgn000289|Gene012531.1	Bm_scaf18 8 236 3018586 3018728 - 1122 3018566 3018748	-	4	0	FASTA:55-77	TAGCAGATTTTGGTAAATGCTGG	57
BM_gRNA_1322	BMgn000289|Gene012531.1	Bm_scaf18 8 236 3018586 3018728 - 1122 3018566 3018748	+	4	0	FASTA:85-107	GCAAAATGATAAACAAGCCACGG	104
BM_gRNA_1323	BMgn000289|Gene012531.1	Bm_scaf18 8 236 3018586 3018728 - 1122 3018566 3018748	+	4	0	FASTA:97-119	ACAAGCCACGGTCGTTCTTTTGG	116
BM_gRNA_1324	BMgn000290|Gene012532.0	Bm_scaf18 4 0 3004120 3004825 - 1372 3004100 3004845	-	6	0	FASTA:685-707	TCCAAAAGGATGGTTCCAATTGG	687
BM_gRNA_1325	BMgn000290|Gene012532.1	Bm_scaf18 4 706 3003590 3003761 - 1372 3003570 3003781	+	6	0	FASTA:33-55	ACCCAGTTATACATGCATCCTGG	52
BM_gRNA_1326	BMgn000290|Gene012532.2	Bm_scaf18 4 878 3002980 3003015 - 1372 3002960 3003035 Warning:CutS3002856	-	4	0	FASTA:41-63	GGCAGAGTTATGATGTGGAAAGG	43
BM_gRNA_1327	BMgn000290|Gene012532.0	Bm_scaf18 4 0 3004120 3004825 - 1372 3004100 3004845	-	5	0	FASTA:408-430	CCATATTGGTATTCCCCACCCGG	410
BM_gRNA_1328	BMgn000290|Gene012532.1	Bm_scaf18 4 706 3003590 3003761 - 1372 3003570 3003781	-	5	0	FASTA:155-177	GGGAAAAGCTTATTTCCCCAAGG	157
BM_gRNA_1329	BMgn000291|Gene012537.1	Bm_scaf18 9 159 2839301 2839446 - 2807 2839281 2839466	+	6	0	FASTA:32-54	GCGCTGAGTAGGCTTGTGGCGGG	51
BM_gRNA_1330	BMgn000291|Gene012537.2	Bm_scaf18 9 305 2838485 2838592 - 2807 2838465 2838612	+	4	0	FASTA:28-50	GACCGAAGCTAATGGAAAATAGG	47
BM_gRNA_1331	BMgn000291|Gene012537.1	Bm_scaf18 9 159 2839301 2839446 - 2807 2839281 2839466	-	6	0	FASTA:119-141	CATATCGCCAAGGTGGGGAAGGG	121
BM_gRNA_1332	BMgn000291|Gene012537.2	Bm_scaf18 9 305 2838485 2838592 - 2807 2838465 2838612	+	4	0	FASTA:61-83	AATTGAAGCAAGTTCTCATTTGG	80
BM_gRNA_1333	BMgn000291|Gene012537.1	Bm_scaf18 9 159 2839301 2839446 - 2807 2839281 2839466	-	5	0	FASTA:64-86	GATCGCTCTTGTTATCCATCAGG	66
BM_gRNA_1334	BMgn000292|Gene012545.1	Bm_scaf18 12 127 2659166 2659291 - 2064 2659146 2659311	+	6	0	FASTA:81-103	GTTGTTATCGGTTCGGGCCCTGG	100
BM_gRNA_1335	BMgn000292|Gene012545.2	Bm_scaf18 12 253 2658805 2659041 - 2064 2658785 2659061	+	6	0	FASTA:204-226	AATGCTGTTAAAGGCCTCACAGG	223
BM_gRNA_1336	BMgn000292|Gene012545.1	Bm_scaf18 12 127 2659166 2659291 - 2064 2659146 2659311	+	6	0	FASTA:125-147	AGCTGCCCAGCTTGGCATGAAGG	144
BM_gRNA_1337	BMgn000292|Gene012545.2	Bm_scaf18 12 253 2658805 2659041 - 2064 2658785 2659061	-	5	0	FASTA:41-63	GACAAGTACCTCCTAAAGTAGGG	43
BM_gRNA_1338	BMgn000292|Gene012545.2	Bm_scaf18 12 253 2658805 2659041 - 2064 2658785 2659061	-	5	0	FASTA:124-146	CCTTTGCTTGAAGTCATGTTTGG	126
BM_gRNA_1339	BMgn000293|Gene012549.1	Bm_scaf18 5 274 2600381 2600505 - 1199 2600361 2600525	-	5	0	FASTA:114-136	TCTCTATCAGTTACAACACCCGG	116
BM_gRNA_1340	BMgn000293|Gene012549.2	Bm_scaf18 5 399 2599519 2599693 - 1199 2599499 2599713	+	6	0	FASTA:64-86	CTCAGATGTGCAGATGTAGTTGG	83
BM_gRNA_1341	BMgn000293|Gene012549.1	Bm_scaf18 5 274 2600381 2600505 - 1199 2600361 2600525	+	4	0	FASTA:86-108	TGACACACAGATTGTATTTCTGG	105
BM_gRNA_1342	BMgn000293|Gene012549.2	Bm_scaf18 5 399 2599519 2599693 - 1199 2599499 2599713	-	5	0	FASTA:31-53	CATGATCCTAACATTGAAGGTGG	33
BM_gRNA_1343	BMgn000293|Gene012549.1	Bm_scaf18 5 274 2600381 2600505 - 1199 2600361 2600525	+	4	0	FASTA:95-117	GATTGTATTTCTGGATACACCGG	114
BM_gRNA_1344	BMgn000294|Gene012550.0	Bm_scaf18 4 0 2473262 2473328 - 699 2473242 2473348	+	4	0	FASTA:23-45	GTTGTTAGAAGAGAATAAGTCGG	42
BM_gRNA_1345	BMgn000294|Gene012550.1	Bm_scaf18 4 67 2471532 2471665 - 699 2471512 2471685	-	5	0	FASTA:26-48	CGAACTTTTGGGCCTGATTCGGG	28
BM_gRNA_1346	BMgn000294|Gene012550.2	Bm_scaf18 4 201 2471185 2471449 - 699 2471165 2471469 Warning:CutS2471105	-	6	0	FASTA:60-82	TCCGTTATCACAGGCTTTCTTGG	62
BM_gRNA_1347	BMgn000294|Gene012550.1	Bm_scaf18 4 67 2471532 2471665 - 699 2471512 2471685	+	5	0	FASTA:53-75	CAAAAAAGTTGGTACTCTGTAGG	72
BM_gRNA_1348	BMgn000294|Gene012550.2	Bm_scaf18 4 201 2471185 2471449 - 699 2471165 2471469 Warning:CutS2471105	+	5	0	FASTA:125-147	GGACACGATTTCGGGGTACGAGG	144
BM_gRNA_1349	BMgn000295|Gene012561.0	Bm_scaf18 5 0 2101670 2101770 - 657 2101650 2101790	+	4	0	FASTA:90-112	ATCATAGGAAACAGCTCAGTAGG	109
BM_gRNA_1350	BMgn000295|Gene012561.1	Bm_scaf18 5 101 2101147 2101264 - 657 2101127 2101284	-	5	0	FASTA:59-81	GATACCAACGGTAGACACAAAGG	61
BM_gRNA_1351	BMgn000295|Gene012561.2	Bm_scaf18 5 219 2100784 2100902 - 657 2100764 2100922	-	5	0	FASTA:44-66	AATAGGCAGTCGTGATGGTACGG	46
BM_gRNA_1352	BMgn000295|Gene012561.1	Bm_scaf18 5 101 2101147 2101264 - 657 2101127 2101284	-	5	0	FASTA:105-127	ATTTGACGCGCTTATCGTGCCGG	107
BM_gRNA_1353	BMgn000295|Gene012561.2	Bm_scaf18 5 219 2100784 2100902 - 657 2100764 2100922	+	5	0	FASTA:118-140	GTTTCAACAGCGTACAGGACTGG	137
BM_gRNA_1354	BMgn000296|Gene012566.0	Bm_scaf18 4 0 2040605 2040773 - 705 2040585 2040793	+	6	0	FASTA:54-76	CGTTTCGAGCGTACTATCCAAGG	73
BM_gRNA_1355	BMgn000296|Gene012566.1	Bm_scaf18 4 169 2038951 2039126 - 705 2038931 2039146	-	5	0	FASTA:106-128	CGGAGCCGTCTCCTTCAGCGAGG	108
BM_gRNA_1356	BMgn000296|Gene012566.2	Bm_scaf18 4 345 2038490 2038614 - 705 2038470 2038634 Warning:CutS2038448	+	6	0	FASTA:44-66	GTCCCTCCGAATGCTCGCCGAGG	63
BM_gRNA_1357	BMgn000296|Gene012566.0	Bm_scaf18 4 0 2040605 2040773 - 705 2040585 2040793	-	5	0	FASTA:130-152	TCCGAGCATGAACTCCACTGCGG	132
BM_gRNA_1358	BMgn000296|Gene012566.1	Bm_scaf18 4 169 2038951 2039126 - 705 2038931 2039146	+	5	0	FASTA:145-167	CGTTAACATGTGCTTGCCTCAGG	164
BM_gRNA_1359	BMgn000297|Gene012569.0	Bm_scaf18 7 0 1919195 1919502 - 3103 1919175 1919522	+	6	0	FASTA:151-173	ATTGCGTGATCTGACTTAGGGGG	170
BM_gRNA_1360	BMgn000297|Gene012569.1	Bm_scaf18 7 308 1902721 1902854 - 3103 1902701 1902874	-	6	0	FASTA:150-172	GGTGTCCGCGTGACTCACCTCGG	152
BM_gRNA_1361	BMgn000297|Gene012569.2	Bm_scaf18 7 442 1882061 1882127 - 3103 1882041 1882147	+	5	0	FASTA:16-38	TTCAGATGCGGCGACAGGCTCGG	35
BM_gRNA_1362	BMgn000297|Gene012569.0	Bm_scaf18 7 0 1919195 1919502 - 3103 1919175 1919522	-	5	0	FASTA:25-47	GCAGCGCGCAGGCGCCGCCAAGG	27
BM_gRNA_1363	BMgn000297|Gene012569.1	Bm_scaf18 7 308 1902721 1902854 - 3103 1902701 1902874	+	5	0	FASTA:50-72	GCACTGTTGCTATGAGGTGAGGG	69
BM_gRNA_1364	BMgn000298|Gene012570.5	Bm_scaf18 16 781 1870308 1870609 - 2714 1870288 1870629	+	6	0	FASTA:112-134	AAAATTAGCCCCTACGGGAAAGG	131
BM_gRNA_1365	BMgn000298|Gene012570.5	Bm_scaf18 16 781 1870308 1870609 - 2714 1870288 1870629	+	5	0	FASTA:64-86	ACAAGAACAATTCGCTGAACTGG	83
BM_gRNA_1366	BMgn000298|Gene012570.5	Bm_scaf18 16 781 1870308 1870609 - 2714 1870288 1870629	+	4	0	FASTA:158-180	CTACTACAAGAACTGCGTAAAGG	177
BM_gRNA_1367	BMgn000298|Gene012570.5	Bm_scaf18 16 781 1870308 1870609 - 2714 1870288 1870629	+	4	0	FASTA:181-203	TGCATCTTTAACAGATGCGATGG	200
BM_gRNA_1368	BMgn000298|Gene012570.5	Bm_scaf18 16 781 1870308 1870609 - 2714 1870288 1870629	+	4	0	FASTA:253-275	TCAAATGCTGTCATTGCTAACGG	272
BM_gRNA_1369	BMgn000300|Gene012571.0	Bm_scaf18 3 0 1862557 1862910 - 2379 1862537 1862930	+	6	0	FASTA:266-288	TCCCGTATGCCAGATGTCGGAGG	285
BM_gRNA_1370	BMgn000300|Gene012571.1	Bm_scaf18 3 354 1860826 1862057 - 2379 1860806 1862077 Warning:CutS1860268	+	6	0	FASTA:607-629	AGTGGAAAAGAAGGGCACCTCGG	626
BM_gRNA_1371	BMgn000300|Gene012571.0	Bm_scaf18 3 0 1862557 1862910 - 2379 1862537 1862930	-	5	0	FASTA:307-329	CTGGGTACGGCCCAACAGGTAGG	309
BM_gRNA_1372	BMgn000300|Gene012571.1	Bm_scaf18 3 354 1860826 1862057 - 2379 1860806 1862077 Warning:CutS1860268	-	5	0	FASTA:238-260	ATGCATCATGTTTCCTGTGTAGG	240
BM_gRNA_1373	BMgn000300|Gene012571.0	Bm_scaf18 3 0 1862557 1862910 - 2379 1862537 1862930	-	4	0	FASTA:235-257	CAGCGGCCAACACGACAACTTGG	237
BM_gRNA_1374	BMgn000301|Gene012572.1	Bm_scaf18 15 277 1824283 1824438 - 2389 1824263 1824458	+	6	0	FASTA:86-108	TTAGGTCTGCAGCCAGCGTTTGG	105
BM_gRNA_1375	BMgn000301|Gene012572.2	Bm_scaf18 15 433 1822300 1822420 - 2389 1822280 1822440	+	5	0	FASTA:57-79	GTCTCAACATTACAAGGAGCTGG	76
BM_gRNA_1376	BMgn000301|Gene012572.1	Bm_scaf18 15 277 1824283 1824438 - 2389 1824263 1824458	+	5	0	FASTA:54-76	GACATCTTCGAGTTATGCTGTGG	73
BM_gRNA_1377	BMgn000301|Gene012572.2	Bm_scaf18 15 433 1822300 1822420 - 2389 1822280 1822440	-	5	0	FASTA:85-107	CGTTGAAGGGACGATGAATCAGG	87
BM_gRNA_1378	BMgn000301|Gene012572.1	Bm_scaf18 15 277 1824283 1824438 - 2389 1824263 1824458	-	5	0	FASTA:121-143	CTGATCTTGCCCAGTTGAAGGGG	123
BM_gRNA_1379	BMgn000302|Gene012577.1	Bm_scaf18 19 90 1763677 1763883 - 5767 1763657 1763903	-	6	0	FASTA:172-194	AACCTTCGGCGTCGAGAACCAGG	174
BM_gRNA_1380	BMgn000302|Gene012577.2	Bm_scaf18 19 297 1763173 1763351 - 5767 1763153 1763371	+	5	0	FASTA:22-44	TTGGGCAAGTGGTGGACAATGGG	41
BM_gRNA_1381	BMgn000302|Gene012577.1	Bm_scaf18 19 90 1763677 1763883 - 5767 1763657 1763903	+	5	0	FASTA:140-162	AAAATTGCGAGAAACCATTCTGG	159
BM_gRNA_1382	BMgn000302|Gene012577.2	Bm_scaf18 19 297 1763173 1763351 - 5767 1763153 1763371	-	5	0	FASTA:163-185	GCTTATATATGGTTTGAGTCTGG	165
BM_gRNA_1383	BMgn000302|Gene012577.1	Bm_scaf18 19 90 1763677 1763883 - 5767 1763657 1763903	+	5	0	FASTA:194-216	TGTTTGGATCGTCTTTACGGTGG	213
BM_gRNA_1384	BMgn000303|Gene012580.0	Bm_scaf18 4 0 1732149 1732509 - 905 1732129 1732529	-	4	0	FASTA:247-269	CGATAATCATTGCTTTGTTCCGG	249
BM_gRNA_1385	BMgn000303|Gene012580.1	Bm_scaf18 4 361 1730715 1730810 - 905 1730695 1730830	-	5	0	FASTA:87-109	ATAGACAGTCTTTGCATAGCCGG	89
BM_gRNA_1386	BMgn000303|Gene012580.2	Bm_scaf18 4 457 1728865 1729010 - 905 1728845 1729030 Warning:CutS1728750	-	5	0	FASTA:46-68	TAGTGACTGTCGACTGCTCACGG	48
BM_gRNA_1387	BMgn000303|Gene012580.0	Bm_scaf18 4 0 1732149 1732509 - 905 1732129 1732529	-	4	0	FASTA:318-340	TAAATGTTCCTTTAACGAAACGG	320
BM_gRNA_1388	BMgn000303|Gene012580.2	Bm_scaf18 4 457 1728865 1729010 - 905 1728845 1729030 Warning:CutS1728750	-	5	0	FASTA:123-145	GCCAACATCACAGGGATGTTAGG	125
BM_gRNA_1389	BMgn000304|Gene012582.0	Bm_scaf18 2 0 1716084 1716711 - 1650 1716064 1716731	+	5	0	FASTA:516-538	TTCAGTTATGGATGGAGAATTGG	535
BM_gRNA_1390	BMgn000304|Gene012582.1	Bm_scaf18 2 628 1714456 1714927 - 1650 1714436 1714947 Warning:CutS1713906	+	5	0	FASTA:75-97	GCAACCTGTCTTGCAGCACATGG	94
BM_gRNA_1391	BMgn000304|Gene012582.0	Bm_scaf18 2 0 1716084 1716711 - 1650 1716064 1716731	+	5	0	FASTA:604-626	AATCGCTTAGTGGAGTGTGATGG	623
BM_gRNA_1392	BMgn000304|Gene012582.1	Bm_scaf18 2 628 1714456 1714927 - 1650 1714436 1714947 Warning:CutS1713906	-	5	0	FASTA:136-158	AGACACTCTTGATGGTGACTTGG	138
BM_gRNA_1393	BMgn000304|Gene012582.0	Bm_scaf18 2 0 1716084 1716711 - 1650 1716064 1716731	+	4	0	FASTA:381-403	ATATCTTAACGAAGAGAAGATGG	400
BM_gRNA_1394	BMgn000305|Gene012583.1	Bm_scaf18 3 229 1693573 1693787 - 794 1693553 1693807	+	5	0	FASTA:63-85	TGAATAATGCCAGATATGTGAGG	82
BM_gRNA_1395	BMgn000305|Gene012583.1	Bm_scaf18 3 229 1693573 1693787 - 794 1693553 1693807	+	5	0	FASTA:104-126	TTCCATTTCTACGATCGGACTGG	123
BM_gRNA_1396	BMgn000305|Gene012583.1	Bm_scaf18 3 229 1693573 1693787 - 794 1693553 1693807	+	4	0	FASTA:36-58	AAGACGTTGACATTTTCTTGAGG	55
BM_gRNA_1397	BMgn000305|Gene012583.1	Bm_scaf18 3 229 1693573 1693787 - 794 1693553 1693807	+	4	0	FASTA:149-171	GTGGACGGTCACGCTCTACAAGG	168
BM_gRNA_1398	BMgn000305|Gene012583.1	Bm_scaf18 3 229 1693573 1693787 - 794 1693553 1693807	-	4	0	FASTA:174-196	TCTTCGATAACGGATACTCGAGG	176
BM_gRNA_1399	BMgn000306|Gene012584.1	Bm_scaf18 7 20 1688009 1688133 - 978 1687989 1688153	+	6	0	FASTA:88-110	GAAACAGGCATCGGGGTTATCGG	107
BM_gRNA_1400	BMgn000306|Gene012584.2	Bm_scaf18 7 145 1687799 1687892 - 978 1687779 1687912	+	4	0	FASTA:64-86	TTCAGTTTCTGTTGTCAGATCGG	83
BM_gRNA_1401	BMgn000306|Gene012584.1	Bm_scaf18 7 20 1688009 1688133 - 978 1687989 1688153	+	5	0	FASTA:111-133	AAGTGTTGTTGAAGGCCGGTCGG	130
BM_gRNA_1402	BMgn000306|Gene012584.1	Bm_scaf18 7 20 1688009 1688133 - 978 1687989 1688153	+	4	0	FASTA:47-69	TAAGAGAAGATGTGGACTTATGG	66
BM_gRNA_1403	BMgn000306|Gene012584.1	Bm_scaf18 7 20 1688009 1688133 - 978 1687989 1688153	+	4	0	FASTA:79-101	TATGAAAATGAAACAGGCATCGG	98
BM_gRNA_1404	BMgn000307|Gene012585.0	Bm_scaf18 8 0 1677741 1678081 - 3651 1677721 1678101	+	5	0	FASTA:325-347	ATAGAATTTGCACAGGTTCCTGG	344
BM_gRNA_1405	BMgn000307|Gene012585.1	Bm_scaf18 8 341 1677475 1677671 - 3651 1677455 1677691	-	6	0	FASTA:188-210	GTGGCAAGTTGCCATCCATCAGG	190
BM_gRNA_1406	BMgn000307|Gene012585.2	Bm_scaf18 8 538 1677252 1677407 - 3651 1677232 1677427	-	6	0	FASTA:84-106	AATGTAATAGCATCTAAGTCTGG	86
BM_gRNA_1407	BMgn000307|Gene012585.0	Bm_scaf18 8 0 1677741 1678081 - 3651 1677721 1678101	-	4	0	FASTA:188-210	ATGTTTCCACTGGAACTCTGCGG	190
BM_gRNA_1408	BMgn000307|Gene012585.1	Bm_scaf18 8 341 1677475 1677671 - 3651 1677455 1677691	+	5	0	FASTA:50-72	ATTCACGGAAACGAAGTTCTGGG	69
BM_gRNA_1409	BMgn000308|Gene012589.0	Bm_scaf18 6 0 1616573 1616858 - 1017 1616553 1616878	+	6	0	FASTA:206-228	TCTGCAGTCGGAGTGCGATGAGG	225
BM_gRNA_1410	BMgn000308|Gene012589.1	Bm_scaf18 6 286 1613545 1613748 - 1017 1613525 1613768	+	6	0	FASTA:100-122	TAATTTGCGAGGCGGCTCTAGGG	119
BM_gRNA_1411	BMgn000308|Gene012589.2	Bm_scaf18 6 490 1612759 1612919 - 1017 1612739 1612939	+	6	0	FASTA:32-54	TCGGTAGCGTCAGTGGGCCGTGG	51
BM_gRNA_1412	BMgn000308|Gene012589.0	Bm_scaf18 6 0 1616573 1616858 - 1017 1616553 1616878	+	6	0	FASTA:284-306	AGCTCAAAAGCCCACGTCGCAGG	303
BM_gRNA_1413	BMgn000308|Gene012589.1	Bm_scaf18 6 286 1613545 1613748 - 1017 1613525 1613768	+	5	0	FASTA:29-51	GGCAGCTTGGGAGGCTCGTCCGG	48
BM_gRNA_1414	BMgn000309|Gene012590.1	Bm_scaf18 7 6 1542140 1542232 - 933 1542120 1542252	+	6	0	FASTA:51-73	AAGATAGGGCACGCACATAGCGG	70
BM_gRNA_1415	BMgn000309|Gene012590.2	Bm_scaf18 7 99 1540934 1541046 - 933 1540914 1541066	+	5	0	FASTA:26-48	TGCTGGTGTTGTAGCAATGCTGG	45
BM_gRNA_1416	BMgn000309|Gene012590.1	Bm_scaf18 7 6 1542140 1542232 - 933 1542120 1542252	+	4	0	FASTA:23-45	CACAGCGCCCAAGTTCCCCGTGG	42
BM_gRNA_1417	BMgn000309|Gene012590.2	Bm_scaf18 7 99 1540934 1541046 - 933 1540914 1541066	-	5	0	FASTA:69-91	TCGTATTTGGCGTCGATGTACGG	71
BM_gRNA_1418	BMgn000309|Gene012590.1	Bm_scaf18 7 6 1542140 1542232 - 933 1542120 1542252	+	4	0	FASTA:80-102	TAAGGTGAAAGTGGACTCCCTGG	99
BM_gRNA_1419	BMgn000310|Gene012592.0	Bm_scaf18 11 0 1517125 1517182 - 1545 1517105 1517202	+	4	0	FASTA:25-47	GTGCACTTCTAAACTCACTCAGG	44
BM_gRNA_1420	BMgn000310|Gene012592.1	Bm_scaf18 11 58 1516430 1516572 - 1545 1516410 1516592	+	6	0	FASTA:37-59	GCGCTTTAGCGTAACGCCTGGGG	56
BM_gRNA_1421	BMgn000310|Gene012592.2	Bm_scaf18 11 201 1515691 1515816 - 1545 1515671 1515836	+	5	0	FASTA:49-71	TAACCGCACGCGGCGTGGATTGG	68
BM_gRNA_1422	BMgn000310|Gene012592.1	Bm_scaf18 11 58 1516430 1516572 - 1545 1516410 1516592	+	5	0	FASTA:62-84	AGCGGCGACGGACCCGGAGAAGG	81
BM_gRNA_1423	BMgn000310|Gene012592.2	Bm_scaf18 11 201 1515691 1515816 - 1545 1515671 1515836	-	5	0	FASTA:95-117	CATCTGGTTGGGCAGTTCCTCGG	97
BM_gRNA_1424	BMgn000311|Gene012594.0	Bm_scaf18 2 0 1486441 1486753 - 666 1486421 1486773	-	5	0	FASTA:81-103	CTCAAAATCTCACCGTGTCTTGG	83
BM_gRNA_1425	BMgn000311|Gene012594.1	Bm_scaf18 2 313 1485260 1485390 - 666 1485240 1485410 Warning:CutS1485038	+	4	0	FASTA:65-87	ATAAAGTTGAATCCATTTGGTGG	84
BM_gRNA_1426	BMgn000311|Gene012594.0	Bm_scaf18 2 0 1486441 1486753 - 666 1486421 1486773	+	4	0	FASTA:54-76	GAGATAATTTTACGTGCAAGTGG	73
BM_gRNA_1427	BMgn000311|Gene012594.0	Bm_scaf18 2 0 1486441 1486753 - 666 1486421 1486773	-	4	0	FASTA:228-250	CTTCGTGCGACTTCTTTCAGTGG	230
BM_gRNA_1428	BMgn000311|Gene012594.0	Bm_scaf18 2 0 1486441 1486753 - 666 1486421 1486773	+	4	0	FASTA:296-318	GTTAATTTCTGTATCAAAGAAGG	315
BM_gRNA_1429	BMgn000312|Gene012598.2	Bm_scaf18 15 179 1457970 1458059 - 3126 1457950 1458079	-	4	0	FASTA:43-65	CTTCTCCTTGTCACTGAAGCGGG	45
BM_gRNA_1430	BMgn000312|Gene012598.2	Bm_scaf18 15 179 1457970 1458059 - 3126 1457950 1458079	+	4	0	FASTA:38-60	GGACACCCGCTTCAGTGACAAGG	57
BM_gRNA_1431	BMgn000312|Gene012598.2	Bm_scaf18 15 179 1457970 1458059 - 3126 1457950 1458079	-	4	0	FASTA:44-66	TCTTCTCCTTGTCACTGAAGCGG	46
BM_gRNA_1432	BMgn000312|Gene012598.3	Bm_scaf18 15 269 1457430 1457552 - 3126 1457410 1457572	+	4	0	FASTA:40-62	AGCTCGACGTGCTGAAGCCGTGG	59
BM_gRNA_1433	BMgn000312|Gene012598.3	Bm_scaf18 15 269 1457430 1457552 - 3126 1457410 1457572	+	4	1	FASTA:74-96	GATAACAGAAATTCTAAACATGG	93
BM_gRNA_1434	BMgn000313|Gene012603.4	Bm_scaf18 11 1175 1292801 1292922 - 2249 1292781 1292942	+	5	0	FASTA:21-43	TGCTCACACGTCGAAACGAGTGG	40
BM_gRNA_1435	BMgn000313|Gene012603.4	Bm_scaf18 11 1175 1292801 1292922 - 2249 1292781 1292942	+	5	0	FASTA:66-88	ATGGCTTCTAGCCTTCACATTGG	85
BM_gRNA_1436	BMgn000313|Gene012603.4	Bm_scaf18 11 1175 1292801 1292922 - 2249 1292781 1292942	+	5	0	FASTA:121-143	ATGGAAGATGAAATAGACCCAGG	140
BM_gRNA_1437	BMgn000313|Gene012603.4	Bm_scaf18 11 1175 1292801 1292922 - 2249 1292781 1292942	-	4	0	FASTA:89-111	CCACGACATTTCCATTGGTGCGG	91
BM_gRNA_1438	BMgn000313|Gene012603.4	Bm_scaf18 11 1175 1292801 1292922 - 2249 1292781 1292942	-	4	0	FASTA:77-99	CATTGGTGCGGCCAATGTGAAGG	79
BM_gRNA_1439	BMgn000314|Gene012605.0	Bm_scaf18 6 0 1262108 1263529 - 2339 1262088 1263549	-	4	0	FASTA:536-558	GAAAAGGACGAGGAATTTGCAGG	538
BM_gRNA_1440	BMgn000314|Gene012605.1	Bm_scaf18 6 1422 1261847 1261983 - 2339 1261827 1262003 Warning:CutS1261781	-	6	0	FASTA:79-101	GCTGATTGACCGTATCCGCCTGG	81
BM_gRNA_1441	BMgn000314|Gene012605.0	Bm_scaf18 6 0 1262108 1263529 - 2339 1262088 1263549	+	4	0	FASTA:737-759	TCGATTCTTCAAAACACCACAGG	756
BM_gRNA_1442	BMgn000314|Gene012605.1	Bm_scaf18 6 1422 1261847 1261983 - 2339 1261827 1262003 Warning:CutS1261781	-	5	0	FASTA:50-72	GTGATGCCGAGACAAACAAGAGG	52
BM_gRNA_1443	BMgn000314|Gene012605.0	Bm_scaf18 6 0 1262108 1263529 - 2339 1262088 1263549	-	4	0	FASTA:1066-1088	TTTTACTTTGTCGTTTGTGGTGG	1068
BM_gRNA_1444	BMgn000315|Gene012611.0	Bm_scaf18 2 0 1134188 1134449 - 393 1134168 1134469 Warning:CutS1134098	+	6	0	FASTA:242-264	TACGAAGCAATGTCCGAACAAGG	261
BM_gRNA_1445	BMgn000315|Gene012611.0	Bm_scaf18 2 0 1134188 1134449 - 393 1134168 1134469 Warning:CutS1134098	+	5	0	FASTA:26-48	TGGACGGAGCAGCAACACTGAGG	45
BM_gRNA_1446	BMgn000315|Gene012611.0	Bm_scaf18 2 0 1134188 1134449 - 393 1134168 1134469 Warning:CutS1134098	-	5	0	FASTA:57-79	CCGCCGAACTTGCTATGATACGG	59
BM_gRNA_1447	BMgn000315|Gene012611.0	Bm_scaf18 2 0 1134188 1134449 - 393 1134168 1134469 Warning:CutS1134098	+	5	0	FASTA:92-114	GTACGCTCTTCCAGAAGCAGTGG	111
BM_gRNA_1448	BMgn000315|Gene012611.0	Bm_scaf18 2 0 1134188 1134449 - 393 1134168 1134469 Warning:CutS1134098	-	5	0	FASTA:123-145	TTGTGATCGTGTGGCTCCTCGGG	125
BM_gRNA_1449	BMgn000316|Gene012612.0	Bm_scaf18 5 0 1126493 1126672 - 1395 1126473 1126692	+	5	0	FASTA:59-81	ATCGAATATTGTGAGTGCATTGG	78
BM_gRNA_1450	BMgn000316|Gene012612.1	Bm_scaf18 5 180 1125985 1126161 - 1395 1125965 1126181	-	5	0	FASTA:26-48	TGATCACTGGATGCTGACATGGG	28
BM_gRNA_1451	BMgn000316|Gene012612.2	Bm_scaf18 5 357 1125297 1125635 - 1395 1125277 1125655	+	5	0	FASTA:89-111	ACACCACAATGCCTCCCACAAGG	108
BM_gRNA_1452	BMgn000316|Gene012612.0	Bm_scaf18 5 0 1126493 1126672 - 1395 1126473 1126692	-	4	0	FASTA:25-47	CCAGCGTAAACAAAATTGGTCGG	27
BM_gRNA_1453	BMgn000316|Gene012612.1	Bm_scaf18 5 180 1125985 1126161 - 1395 1125965 1126181	+	5	0	FASTA:84-106	TTGTTGTCATACATGTACCAAGG	103
BM_gRNA_1454	BMgn000317|Gene012614.0	Bm_scaf18 2 0 1100436 1100489 - 486 1100416 1100509	-	4	0	FASTA:29-51	GTTCGCAATATGCGGAACCTCGG	31
BM_gRNA_1455	BMgn000317|Gene012614.1	Bm_scaf18 2 54 1098631 1098900 - 486 1098611 1098920 Warning:CutS1098469	-	7	0	FASTA:53-75	GCGTCGCCGATCGACCATCCTGG	55
BM_gRNA_1456	BMgn000317|Gene012614.0	Bm_scaf18 2 0 1100436 1100489 - 486 1100416 1100509	-	4	0	FASTA:51-73	TGATATGGAGTCCACATATGCGG	53
BM_gRNA_1457	BMgn000317|Gene012614.1	Bm_scaf18 2 54 1098631 1098900 - 486 1098611 1098920 Warning:CutS1098469	+	6	0	FASTA:108-130	GGAGAAAGCGGTGCTAGACATGG	127
BM_gRNA_1458	BMgn000317|Gene012614.1	Bm_scaf18 2 54 1098631 1098900 - 486 1098611 1098920 Warning:CutS1098469	-	6	0	FASTA:237-259	GCCGGTAATGGTACCAGCGGTGG	239
BM_gRNA_1459	BMgn000318|Gene012620.0	Bm_scaf18 1 0 889881 890052 - 258 889861 890072 Warning:CutS889795	+	7	0	FASTA:156-178	CTGTGCACGGATAGCCGCGCAGG	175
BM_gRNA_1460	BMgn000318|Gene012620.0	Bm_scaf18 1 0 889881 890052 - 258 889861 890072 Warning:CutS889795	-	6	0	FASTA:98-120	AGCGCTGCTCTTCCGTGCTCCGG	100
BM_gRNA_1461	BMgn000318|Gene012620.0	Bm_scaf18 1 0 889881 890052 - 258 889861 890072 Warning:CutS889795	+	5	0	FASTA:23-45	GGCATTGGGCAAGGGCGGGCTGG	42
BM_gRNA_1462	BMgn000318|Gene012620.0	Bm_scaf18 1 0 889881 890052 - 258 889861 890072 Warning:CutS889795	-	5	0	FASTA:60-82	CGAGCGAGCGAGACAACGACAGG	62
BM_gRNA_1463	BMgn000318|Gene012620.0	Bm_scaf18 1 0 889881 890052 - 258 889861 890072 Warning:CutS889795	-	4	0	FASTA:189-211	AATATAGCTCGGTTCATGGTCGG	191
BM_gRNA_1464	BMgn000319|Gene012621.0	Bm_scaf18 3 0 869870 871702 - 4877 869850 871722	-	6	0	FASTA:167-189	CCACCACAGTGAGTCAACATAGG	169
BM_gRNA_1465	BMgn000319|Gene012621.1	Bm_scaf18 3 1833 868876 869654 - 4877 868856 869674	+	6	0	FASTA:167-189	ACCAGACCGCACTTAGCGTCAGG	186
BM_gRNA_1466	BMgn000319|Gene012621.0	Bm_scaf18 3 0 869870 871702 - 4877 869850 871722	-	6	0	FASTA:779-801	TATGAGTAGGCCATTTCCGTTGG	781
BM_gRNA_1467	BMgn000319|Gene012621.1	Bm_scaf18 3 1833 868876 869654 - 4877 868856 869674	+	6	0	FASTA:194-216	GGACAATTGTCGCCAGCCCACGG	213
BM_gRNA_1468	BMgn000319|Gene012621.0	Bm_scaf18 3 0 869870 871702 - 4877 869850 871722	-	6	0	FASTA:860-882	AGTGGCAGTAAGGATGGCAAGGG	862
BM_gRNA_1469	BMgn000320|Gene012625.0	Bm_scaf18 6 0 846942 847121 - 1062 846922 847141	-	6	0	FASTA:114-136	TCCTGCAGATTAAGCCAGGATGG	116
BM_gRNA_1470	BMgn000320|Gene012625.1	Bm_scaf18 6 180 846692 846868 - 1062 846672 846888	-	4	0	FASTA:30-52	CAATCTTCTACATCTTCAAACGG	32
BM_gRNA_1471	BMgn000320|Gene012625.2	Bm_scaf18 6 357 844550 844705 - 1062 844530 844725	-	5	0	FASTA:26-48	ATTTTGTCCAGTGGTCCATTGGG	28
BM_gRNA_1472	BMgn000320|Gene012625.0	Bm_scaf18 6 0 846942 847121 - 1062 846922 847141	-	5	0	FASTA:27-49	ACGCCTATATCCACTTTTCTGGG	29
BM_gRNA_1473	BMgn000320|Gene012625.1	Bm_scaf18 6 180 846692 846868 - 1062 846672 846888	-	4	0	FASTA:110-132	GTACAATAAAGTTATCAGTGTGG	112
BM_gRNA_1474	BMgn000321|Gene012629.1	Bm_scaf18 11 245 801663 801792 - 4421 801643 801812	-	5	0	FASTA:57-79	TGCGCCACCGTCAAGTGAACTGG	59
BM_gRNA_1475	BMgn000321|Gene012629.2	Bm_scaf18 11 375 801452 801542 - 4421 801432 801562	-	5	0	FASTA:81-103	CTGATGCTTGTCTCAAAGACCGG	83
BM_gRNA_1476	BMgn000321|Gene012629.1	Bm_scaf18 11 245 801663 801792 - 4421 801643 801812	-	5	0	FASTA:86-108	TCACGAGAAACAGTACTCGGAGG	88
BM_gRNA_1477	BMgn000321|Gene012629.1	Bm_scaf18 11 245 801663 801792 - 4421 801643 801812	-	4	0	FASTA:45-67	AAGTGAACTGGAGTCACTTTCGG	47
BM_gRNA_1478	BMgn000321|Gene012629.1	Bm_scaf18 11 245 801663 801792 - 4421 801643 801812	+	5	0	FASTA:50-72	AGTGACTCCAGTTCACTTGACGG	69
BM_gRNA_1479	BMgn000322|Gene012631.0	Bm_scaf18 7 0 756054 756214 - 1410 756034 756234	+	6	0	FASTA:63-85	GGCGGCGGAGGTTCTCGAAGTGG	82
BM_gRNA_1480	BMgn000322|Gene012631.1	Bm_scaf18 7 161 754066 754186 - 1410 754046 754206	+	6	0	FASTA:120-142	GAAATACGTGAACGGCGAATGGG	139
BM_gRNA_1481	BMgn000322|Gene012631.2	Bm_scaf18 7 282 753589 753732 - 1410 753569 753752	-	6	0	FASTA:24-46	GGAACTTCTGCTTTTCCCCCAGG	26
BM_gRNA_1482	BMgn000322|Gene012631.0	Bm_scaf18 7 0 756054 756214 - 1410 756034 756234	+	6	0	FASTA:101-123	TTCCGTGGCACTCGACGACAGGG	120
BM_gRNA_1483	BMgn000322|Gene012631.1	Bm_scaf18 7 161 754066 754186 - 1410 754046 754206	-	5	0	FASTA:31-53	CTAGCGGTTACTTTTACGACGGG	33
BM_gRNA_1484	BMgn000323|Gene012632.0	Bm_scaf18 7 0 731889 732043 - 1557 731869 732063	-	5	0	FASTA:28-50	TGAATGGTACCACGTTTTCAGGG	30
BM_gRNA_1485	BMgn000323|Gene012632.1	Bm_scaf18 7 155 731375 731522 - 1557 731355 731542	-	6	0	FASTA:35-57	AAAAACAAGCACTATGGGCAAGG	37
BM_gRNA_1486	BMgn000323|Gene012632.2	Bm_scaf18 7 303 729763 729888 - 1557 729743 729908	+	4	0	FASTA:48-70	ACAGTTCCATTTCATTTGTCCGG	67
BM_gRNA_1487	BMgn000323|Gene012632.1	Bm_scaf18 7 155 731375 731522 - 1557 731355 731542	-	5	0	FASTA:96-118	GTTTCGATGACACCTCATATGGG	98
BM_gRNA_1488	BMgn000323|Gene012632.1	Bm_scaf18 7 155 731375 731522 - 1557 731355 731542	+	4	0	FASTA:57-79	TGGGGTGGCAACATCTGTTTCGG	76
BM_gRNA_1489	BMgn000324|Gene012633.1	Bm_scaf18 3 57 713963 714081 - 589 713943 714101	+	6	0	FASTA:56-78	CATCGCTGCCCCCCCTACAGAGG	75
BM_gRNA_1490	BMgn000324|Gene012633.2	Bm_scaf18 3 176 712604 712819 - 589 712584 712839 Warning:CutS712407	+	6	0	FASTA:37-59	GGCATCGTGCGTAGCGAAACTGG	56
BM_gRNA_1491	BMgn000324|Gene012633.1	Bm_scaf18 3 57 713963 714081 - 589 713943 714101	-	6	0	FASTA:116-138	TGTAGTTGTAAGCTCCATCGGGG	118
BM_gRNA_1492	BMgn000324|Gene012633.2	Bm_scaf18 3 176 712604 712819 - 589 712584 712839 Warning:CutS712407	+	6	0	FASTA:178-200	GAGACTGGATACCATGCTCAGGG	197
BM_gRNA_1493	BMgn000324|Gene012633.1	Bm_scaf18 3 57 713963 714081 - 589 713943 714101	+	5	0	FASTA:26-48	CGTTGTAGCTCTCGCCCTTGTGG	45
BM_gRNA_1494	BMgn000325|Gene012635.1	Bm_scaf18 3 227 702901 703021 - 686 702881 703041	+	6	0	FASTA:115-137	TATCAATATACTGCGCCTGACGG	134
BM_gRNA_1495	BMgn000325|Gene012635.2	Bm_scaf18 3 348 699679 699787 - 686 699659 699807 Warning:CutS699450	+	6	0	FASTA:74-96	CCACTTGCCAACAGCACCGCCGG	93
BM_gRNA_1496	BMgn000325|Gene012635.1	Bm_scaf18 3 227 702901 703021 - 686 702881 703041	-	5	0	FASTA:72-94	CCTCTTGTTCAGGTATTCCCTGG	74
BM_gRNA_1497	BMgn000325|Gene012635.2	Bm_scaf18 3 348 699679 699787 - 686 699659 699807 Warning:CutS699450	-	4	0	FASTA:32-54	CATTTTCATCCGCCAGATATTGG	34
BM_gRNA_1498	BMgn000325|Gene012635.1	Bm_scaf18 3 227 702901 703021 - 686 702881 703041	+	4	0	FASTA:36-58	CGGAATTTCAGCTGAAGAGCAGG	55
BM_gRNA_1499	BMgn000326|Gene012636.1	Bm_scaf18 2 63 694520 694972 - 774 694500 694992 Warning:CutS694262	+	7	0	FASTA:46-68	TGGCCTTGGCCGCGCCTCAGGGG	65
BM_gRNA_1500	BMgn000326|Gene012636.1	Bm_scaf18 2 63 694520 694972 - 774 694500 694992 Warning:CutS694262	-	6	0	FASTA:70-92	AACAATTGGGATAGGCTCGGTGG	72
BM_gRNA_1501	BMgn000326|Gene012636.1	Bm_scaf18 2 63 694520 694972 - 774 694500 694992 Warning:CutS694262	+	6	0	FASTA:99-121	GACAGCCAAATCAACGGCGACGG	118
BM_gRNA_1502	BMgn000326|Gene012636.1	Bm_scaf18 2 63 694520 694972 - 774 694500 694992 Warning:CutS694262	-	6	0	FASTA:329-351	GAGCGCGCTGGATGGCTTCCGGG	331
BM_gRNA_1503	BMgn000326|Gene012636.1	Bm_scaf18 2 63 694520 694972 - 774 694500 694992 Warning:CutS694262	-	5	0	FASTA:128-150	TGCCGGTTTCGAAAGCGTACTGG	130
BM_gRNA_1504	BMgn000327|Gene012637.1	Bm_scaf18 2 52 683796 684145 - 603 683776 684165 Warning:CutS683595	-	6	0	FASTA:66-88	AGGATCGGGATGGGTTCAGTAGG	68
BM_gRNA_1505	BMgn000327|Gene012637.1	Bm_scaf18 2 52 683796 684145 - 603 683776 684165 Warning:CutS683595	+	5	0	FASTA:26-48	CTTCGGACTTGTGACGGTCGCGG	45
BM_gRNA_1506	BMgn000327|Gene012637.1	Bm_scaf18 2 52 683796 684145 - 603 683776 684165 Warning:CutS683595	+	5	0	FASTA:97-119	AGAGCAGCATCGAGCCTGATGGG	116
BM_gRNA_1507	BMgn000327|Gene012637.1	Bm_scaf18 2 52 683796 684145 - 603 683776 684165 Warning:CutS683595	-	5	0	FASTA:121-143	AGTCTCATAAGAGTATTGGTAGG	123
BM_gRNA_1508	BMgn000327|Gene012637.1	Bm_scaf18 2 52 683796 684145 - 603 683776 684165 Warning:CutS683595	-	5	0	FASTA:234-256	ATAGTACCACCGTCCTCGCTTGG	236
BM_gRNA_1509	BMgn000328|Gene012640.1	Bm_scaf18 5 53 670935 671134 - 657 670915 671154	-	6	0	FASTA:76-98	AGGCTGAGCTAAAACTCCCAGGG	78
BM_gRNA_1510	BMgn000328|Gene012640.2	Bm_scaf18 5 253 669626 669698 - 657 669606 669718	+	4	0	FASTA:37-59	GGAATCAGCGCTCAATCATCTGG	56
BM_gRNA_1511	BMgn000328|Gene012640.1	Bm_scaf18 5 53 670935 671134 - 657 670915 671154	-	5	0	FASTA:100-122	CTTCACGACGGGCACTGGCTTGG	102
BM_gRNA_1512	BMgn000328|Gene012640.1	Bm_scaf18 5 53 670935 671134 - 657 670915 671154	-	5	0	FASTA:129-151	CTGACTACTGACTTCACGACGGG	131
BM_gRNA_1513	BMgn000328|Gene012640.1	Bm_scaf18 5 53 670935 671134 - 657 670915 671154	-	5	0	FASTA:179-201	GATTCACTTCAGTATCAGAACGG	181
BM_gRNA_1514	BMgn000329|Gene012642.1	Bm_scaf18 5 52 651992 652038 - 929 651972 652058	+	5	0	FASTA:23-45	AATCTGCCTGTCTCTGACAGTGG	42
BM_gRNA_1515	BMgn000329|Gene012642.2	Bm_scaf18 5 99 651392 651538 - 929 651372 651558	-	7	0	FASTA:100-122	CGGCTGGGGTCATAACGGCCTGG	102
BM_gRNA_1516	BMgn000329|Gene012642.2	Bm_scaf18 5 99 651392 651538 - 929 651372 651558	-	5	0	FASTA:64-86	CGGCCTGGCTTATAGACGAATGG	66
BM_gRNA_1517	BMgn000329|Gene012642.2	Bm_scaf18 5 99 651392 651538 - 929 651372 651558	-	5	0	FASTA:135-157	CAGAGTTGTCGGGAATGTAACGG	137
BM_gRNA_1518	BMgn000329|Gene012642.2	Bm_scaf18 5 99 651392 651538 - 929 651372 651558	-	4	0	FASTA:28-50	TAAACTCGGTTGTACTGGAAAGG	30
BM_gRNA_1519	BMgn000330|Gene012643.0	Bm_scaf18 2 0 639549 640074 - 790 639529 640094 Warning:CutS639442	-	7	0	FASTA:379-401	TCTCTGCCATCAGGCCCAGGAGG	381
BM_gRNA_1520	BMgn000330|Gene012643.0	Bm_scaf18 2 0 639549 640074 - 790 639529 640094 Warning:CutS639442	+	6	0	FASTA:229-251	GTGCATCAGGTTGGCCCTAATGG	248
BM_gRNA_1521	BMgn000330|Gene012643.0	Bm_scaf18 2 0 639549 640074 - 790 639529 640094 Warning:CutS639442	-	5	0	FASTA:154-176	GTGTATCGTCCTTCATCTCCTGG	156
BM_gRNA_1522	BMgn000330|Gene012643.0	Bm_scaf18 2 0 639549 640074 - 790 639529 640094 Warning:CutS639442	+	5	0	FASTA:193-215	GGCTTATATCCATTCGATGATGG	212
BM_gRNA_1523	BMgn000330|Gene012643.0	Bm_scaf18 2 0 639549 640074 - 790 639529 640094 Warning:CutS639442	+	5	0	FASTA:301-323	AACGGAGGAGAAGGAGGTTTTGG	320
BM_gRNA_1524	BMgn000331|Gene012644.0	Bm_scaf18 2 0 623050 623314 - 692 623030 623334	+	6	0	FASTA:42-64	CCTGCTCACTCTTGGTATCCAGG	61
BM_gRNA_1525	BMgn000331|Gene012644.1	Bm_scaf18 2 265 622280 622475 - 692 622260 622495 Warning:CutS622049	-	5	0	FASTA:91-113	ACGGTCGATGAGTAGACTAAGGG	93
BM_gRNA_1526	BMgn000331|Gene012644.0	Bm_scaf18 2 0 623050 623314 - 692 623030 623334	+	5	0	FASTA:86-108	AAATACAGGCCAGAGATTTACGG	105
BM_gRNA_1527	BMgn000331|Gene012644.1	Bm_scaf18 2 265 622280 622475 - 692 622260 622495 Warning:CutS622049	-	4	0	FASTA:32-54	AGTAGCAACAGAAGGTTCTGCGG	34
BM_gRNA_1528	BMgn000331|Gene012644.0	Bm_scaf18 2 0 623050 623314 - 692 623030 623334	+	5	0	FASTA:116-138	AGTTATTACCCAACGAACGATGG	135
BM_gRNA_1529	BMgn000332|Gene012645.1	Bm_scaf18 4 44 612523 612743 - 767 612503 612763	+	6	0	FASTA:42-64	GCTGTTTCGGCTGCTCAGTTTGG	61
BM_gRNA_1530	BMgn000332|Gene012645.2	Bm_scaf18 4 265 612085 612256 - 767 612065 612276	-	6	0	FASTA:107-129	TGTCCAGGCGAACGATCCCTGGG	109
BM_gRNA_1531	BMgn000332|Gene012645.1	Bm_scaf18 4 44 612523 612743 - 767 612503 612763	-	6	0	FASTA:74-96	AGCCAGGGATCCGAGTTGACTGG	76
BM_gRNA_1532	BMgn000332|Gene012645.2	Bm_scaf18 4 265 612085 612256 - 767 612065 612276	-	5	0	FASTA:64-86	GGATTGCCTCCGAAGTCACGAGG	66
BM_gRNA_1533	BMgn000332|Gene012645.1	Bm_scaf18 4 44 612523 612743 - 767 612503 612763	-	6	0	FASTA:129-151	ATAGCCTGAATGGTCGGTCTGGG	131
BM_gRNA_1534	BMgn000333|Gene012646.1	Bm_scaf18 4 56 603836 604086 - 760 603816 604106	-	6	0	FASTA:166-188	TACTCTGACGGGGGCAACAGAGG	168
BM_gRNA_1535	BMgn000333|Gene012646.2	Bm_scaf18 4 307 603583 603754 - 760 603563 603774	-	7	0	FASTA:64-86	GGGTTTCCACCAAGGTTACGGGG	66
BM_gRNA_1536	BMgn000333|Gene012646.1	Bm_scaf18 4 56 603836 604086 - 760 603816 604106	-	6	0	FASTA:249-271	AAGTAGGTGTAGGAACCGTCGGG	251
BM_gRNA_1537	BMgn000333|Gene012646.2	Bm_scaf18 4 307 603583 603754 - 760 603563 603774	+	6	0	FASTA:104-126	TTGCACAGGGCTCATTCTCCTGG	123
BM_gRNA_1538	BMgn000333|Gene012646.1	Bm_scaf18 4 56 603836 604086 - 760 603816 604106	-	5	0	FASTA:52-74	ATTTTCATACCGGACTTGGGCGG	54
BM_gRNA_1539	BMgn000334|Gene012647.1	Bm_scaf18 4 83 573883 574010 - 833 573863 574030	-	5	0	FASTA:86-108	GCTTGATGATTTCCGCTGTCTGG	88
BM_gRNA_1540	BMgn000334|Gene012647.2	Bm_scaf18 4 211 570572 570746 - 833 570552 570766	+	5	0	FASTA:36-58	CGGTATAAAAGCGGAGGAAACGG	55
BM_gRNA_1541	BMgn000334|Gene012647.1	Bm_scaf18 4 83 573883 574010 - 833 573863 574030	+	4	0	FASTA:111-133	GATTTTGATCAGCAAGTTGACGG	130
BM_gRNA_1542	BMgn000334|Gene012647.2	Bm_scaf18 4 211 570572 570746 - 833 570552 570766	-	5	0	FASTA:81-103	TGATCACGTCACTCGCGTCCGGG	83
BM_gRNA_1543	BMgn000334|Gene012647.1	Bm_scaf18 4 83 573883 574010 - 833 573863 574030	+	4	2	FASTA:23-45	GTCGATCTTCTTGTTTGGTTTGG	42
BM_gRNA_1544	BMgn000335|Gene012649.0	Bm_scaf18 3 0 553543 553736 - 1821 553523 553756	-	5	0	FASTA:109-131	AACATCCCTATGACGGGGCGCGG	111
BM_gRNA_1545	BMgn000335|Gene012649.1	Bm_scaf18 3 194 553179 553370 - 1821 553159 553390	+	5	0	FASTA:27-49	GACAGGCAACGGTATCAAACGGG	46
BM_gRNA_1546	BMgn000335|Gene012649.2	Bm_scaf18 3 386 552020 552847 - 1821 552000 552867 Warning:CutS551413	+	6	0	FASTA:591-613	TATAAGTTCCTCCCAAACTCAGG	610
BM_gRNA_1547	BMgn000335|Gene012649.0	Bm_scaf18 3 0 553543 553736 - 1821 553523 553756	+	5	0	FASTA:134-156	TTTAGAGAGACAGCAGCCTACGG	153
BM_gRNA_1548	BMgn000335|Gene012649.1	Bm_scaf18 3 194 553179 553370 - 1821 553159 553390	-	5	0	FASTA:76-98	GCAACTCGCGCTGAGCTCTTCGG	78
BM_gRNA_1549	BMgn000336|Gene012650.0	Bm_scaf18 3 0 527039 527293 - 1440 527019 527313	-	6	0	FASTA:44-66	TTGGGGAAGAGCCGCCGCAACGG	46
BM_gRNA_1550	BMgn000336|Gene012650.1	Bm_scaf18 3 255 525733 525991 - 1440 525713 526011	-	6	0	FASTA:105-127	TGTATGTATAGGATCCCTGTTGG	107
BM_gRNA_1551	BMgn000336|Gene012650.2	Bm_scaf18 3 514 524657 525102 - 1440 524637 525122 Warning:CutS524177	-	5	0	FASTA:40-62	GGCAGCTTCGGGGTTTGACTTGG	42
BM_gRNA_1552	BMgn000336|Gene012650.0	Bm_scaf18 3 0 527039 527293 - 1440 527019 527313	+	5	0	FASTA:78-100	GTTGAAGCCAGAACAGCAAGTGG	97
BM_gRNA_1553	BMgn000336|Gene012650.1	Bm_scaf18 3 255 525733 525991 - 1440 525713 526011	+	6	0	FASTA:157-179	GAGTACACCGCTGACGAGTTCGG	176
BM_gRNA_1554	BMgn000337|Gene012651.0	Bm_scaf18 3 0 506877 507008 - 716 506857 507028	+	6	0	FASTA:115-137	TCTGATGGACCTAATCCCGATGG	134
BM_gRNA_1555	BMgn000337|Gene012651.1	Bm_scaf18 3 132 506064 506235 - 716 506044 506255	+	5	0	FASTA:37-59	GAAATAAACGCTGAAGAGACTGG	56
BM_gRNA_1556	BMgn000337|Gene012651.2	Bm_scaf18 3 304 503904 504076 - 716 503884 504096 Warning:CutS503665	-	5	0	FASTA:42-64	TGAATCGCTGGAGGAATCGGTGG	44
BM_gRNA_1557	BMgn000337|Gene012651.0	Bm_scaf18 3 0 506877 507008 - 716 506857 507028	+	4	0	FASTA:24-46	CTCAATACTGTTGTGCACATTGG	43
BM_gRNA_1558	BMgn000337|Gene012651.1	Bm_scaf18 3 132 506064 506235 - 716 506044 506255	-	5	0	FASTA:133-155	AGCGCAATTAGCGAACCATCAGG	135
BM_gRNA_1559	BMgn000338|Gene012652.1	Bm_scaf18 4 90 492450 492589 - 701 492430 492609	-	6	0	FASTA:58-80	ATACTGTGTCAGCTGGGGGGCGG	60
BM_gRNA_1560	BMgn000338|Gene012652.2	Bm_scaf18 4 230 490696 490850 - 701 490676 490870	-	6	0	FASTA:89-111	TCCTTGTGCAACTTGGGCTTCGG	91
BM_gRNA_1561	BMgn000338|Gene012652.1	Bm_scaf18 4 90 492450 492589 - 701 492430 492609	-	5	0	FASTA:108-130	TCCTGTGATTGACTCAGGATGGG	110
BM_gRNA_1562	BMgn000338|Gene012652.2	Bm_scaf18 4 230 490696 490850 - 701 490676 490870	-	6	0	FASTA:128-150	AGAGATAGGGATGCCCTCAGGGG	130
BM_gRNA_1563	BMgn000338|Gene012652.1	Bm_scaf18 4 90 492450 492589 - 701 492430 492609	-	4	0	FASTA:34-56	GCAAGCCATTGCCACCAAGGCGG	36
BM_gRNA_1564	BMgn000339|Gene012654.2	Bm_scaf18 3 240 474617 474702 - 489 474597 474722 Warning:CutS474454	+	6	0	FASTA:58-80	GGCGGACTCTTGGGTAATTCTGG	77
BM_gRNA_1565	BMgn000339|Gene012654.2	Bm_scaf18 3 240 474617 474702 - 489 474597 474722 Warning:CutS474454	+	5	0	FASTA:26-48	AAACATCGGAAGGATCGTTCAGG	45
BM_gRNA_1566	BMgn000339|Gene012654.2	Bm_scaf18 3 240 474617 474702 - 489 474597 474722 Warning:CutS474454	+	5	0	FASTA:79-101	GGGGGCTCTCTCGTTGTCCGAGG	98
BM_gRNA_1567	BMgn000339|Gene012654.2	Bm_scaf18 3 240 474617 474702 - 489 474597 474722 Warning:CutS474454	+	4	0	FASTA:40-62	TCGTTCAGGAAAGAAGAAGGCGG	59
BM_gRNA_1568	BMgn000339|Gene012654.2	Bm_scaf18 3 240 474617 474702 - 489 474597 474722 Warning:CutS474454	+	4	0	FASTA:49-71	AAAGAAGAAGGCGGACTCTTGGG	68
BM_gRNA_1569	BMgn000340|Gene012655.1	Bm_scaf18 3 67 454871 454983 - 490 454851 455003	-	6	0	FASTA:61-83	CTGTACGTCCTGAGGGTTTTGGG	63
BM_gRNA_1570	BMgn000340|Gene012655.2	Bm_scaf18 3 180 454648 454793 - 490 454628 454813 Warning:CutS454484	+	6	0	FASTA:102-124	TCAAGGACAGTACTCTTGGGTGG	121
BM_gRNA_1571	BMgn000340|Gene012655.1	Bm_scaf18 3 67 454871 454983 - 490 454851 455003	-	5	0	FASTA:34-56	AGCCGATGCTACGGCGACAAGGG	36
BM_gRNA_1572	BMgn000340|Gene012655.2	Bm_scaf18 3 180 454648 454793 - 490 454628 454813 Warning:CutS454484	-	5	0	FASTA:127-149	ACAGTATACGTGATTCCGTCAGG	129
BM_gRNA_1573	BMgn000340|Gene012655.1	Bm_scaf18 3 67 454871 454983 - 490 454851 455003	-	5	0	FASTA:86-108	CATTGTTGCTGTCATAGCGAAGG	88
BM_gRNA_1574	BMgn000341|Gene012657.2	Bm_scaf18 3 151 442729 442870 - 440 442709 442890 Warning:CutS442582	+	5	0	FASTA:17-39	ACAGATATAGCCAATCTGATGGG	36
BM_gRNA_1575	BMgn000341|Gene012657.2	Bm_scaf18 3 151 442729 442870 - 440 442709 442890 Warning:CutS442582	+	5	0	FASTA:85-107	GAAGAATCCCTGGCTGTTAGAGG	104
BM_gRNA_1576	BMgn000341|Gene012657.2	Bm_scaf18 3 151 442729 442870 - 440 442709 442890 Warning:CutS442582	+	4	0	FASTA:33-55	TGATGGGACCGTATTTGAGCAGG	52
BM_gRNA_1577	BMgn000341|Gene012657.2	Bm_scaf18 3 151 442729 442870 - 440 442709 442890 Warning:CutS442582	+	4	0	FASTA:75-97	GGGCCAAGAAGAAGAATCCCTGG	94
BM_gRNA_1578	BMgn000341|Gene012657.2	Bm_scaf18 3 151 442729 442870 - 440 442709 442890 Warning:CutS442582	-	4	0	FASTA:27-49	CAAATACGGTCCCATCAGATTGG	29
BM_gRNA_1579	BMgn000342|Gene012658.0	Bm_scaf18 3 0 438472 438513 - 378 438452 438533	-	5	0	FASTA:32-54	TTGGCTCCTTTACGATGGCGTGG	34
BM_gRNA_1580	BMgn000342|Gene012658.1	Bm_scaf18 3 42 437335 437444 - 378 437315 437464	-	6	0	FASTA:63-85	AATATTTGCACCTCCCTAGGCGG	65
BM_gRNA_1581	BMgn000342|Gene012658.2	Bm_scaf18 3 152 435778 435877 - 378 435758 435897 Warning:CutS435652	+	6	0	FASTA:85-107	CACGAATCCTTGTCCGTTAGAGG	104
BM_gRNA_1582	BMgn000342|Gene012658.1	Bm_scaf18 3 42 437335 437444 - 378 437315 437464	+	4	0	FASTA:93-115	GAAAATGTCAACAGTGGACGCGG	112
BM_gRNA_1583	BMgn000342|Gene012658.2	Bm_scaf18 3 152 435778 435877 - 378 435758 435897 Warning:CutS435652	-	5	0	FASTA:32-54	CTGCTCAAATCTGGTGCCATCGG	34
BM_gRNA_1584	BMgn000343|Gene012659.1	Bm_scaf18 3 44 433770 433888 - 466 433750 433908	-	6	0	FASTA:49-71	CGGTCCTTGTGGTGCTGAATGGG	51
BM_gRNA_1585	BMgn000343|Gene012659.2	Bm_scaf18 3 163 432736 432882 - 466 432716 432902 Warning:CutS432580	+	5	0	FASTA:98-120	TGATTAAAGGATCATATTCTTGG	117
BM_gRNA_1586	BMgn000343|Gene012659.1	Bm_scaf18 3 44 433770 433888 - 466 433750 433908	+	5	0	FASTA:26-48	TTTGTTCAGTTTCTTGGCGTTGG	45
BM_gRNA_1587	BMgn000343|Gene012659.2	Bm_scaf18 3 163 432736 432882 - 466 432716 432902 Warning:CutS432580	-	5	0	FASTA:146-168	GTCATCTGCGACGTATGTCACGG	148
BM_gRNA_1588	BMgn000343|Gene012659.1	Bm_scaf18 3 44 433770 433888 - 466 433750 433908	+	5	0	FASTA:112-134	ATGACGGACTCGGTTCTTACAGG	131
BM_gRNA_1589	BMgn000344|Gene012661.3	Bm_scaf18 4 535 414335 414833 - 1551 414315 414853 Warning:CutS413818	-	6	0	FASTA:56-78	GCTGCGCGGAAACTCCTGACCGG	58
BM_gRNA_1590	BMgn000344|Gene012661.3	Bm_scaf18 4 535 414335 414833 - 1551 414315 414853 Warning:CutS413818	+	5	0	FASTA:75-97	CAGCTACTAGCTTCTTTGGTTGG	94
BM_gRNA_1591	BMgn000344|Gene012661.3	Bm_scaf18 4 535 414335 414833 - 1551 414315 414853 Warning:CutS413818	+	4	0	FASTA:37-59	ATGATGACGAATTATTCAACCGG	56
BM_gRNA_1592	BMgn000344|Gene012661.3	Bm_scaf18 4 535 414335 414833 - 1551 414315 414853 Warning:CutS413818	-	5	0	FASTA:70-92	CAAAGAAGCTAGTAGCTGCGCGG	72
BM_gRNA_1593	BMgn000344|Gene012661.3	Bm_scaf18 4 535 414335 414833 - 1551 414315 414853 Warning:CutS413818	+	4	0	FASTA:71-93	CGCGCAGCTACTAGCTTCTTTGG	90
BM_gRNA_1594	BMgn000345|Gene012663.0	Bm_scaf18 2 0 385183 385296 - 307 385163 385316	+	6	0	FASTA:24-46	ACTGTTCGTTCTCTGTGCACTGG	43
BM_gRNA_1595	BMgn000345|Gene012663.1	Bm_scaf18 2 114 384180 384269 - 307 384160 384289 Warning:CutS384077	+	6	0	FASTA:55-77	GAAGCCGGTCTTATTACCGTAGG	74
BM_gRNA_1596	BMgn000345|Gene012663.0	Bm_scaf18 2 0 385183 385296 - 307 385163 385316	+	5	0	FASTA:100-122	AACAGCTTTGTCAGACCTGATGG	119
BM_gRNA_1597	BMgn000345|Gene012663.1	Bm_scaf18 2 114 384180 384269 - 307 384160 384289 Warning:CutS384077	-	5	0	FASTA:29-51	TTTCCTTGACACTCCATCACTGG	31
BM_gRNA_1598	BMgn000345|Gene012663.0	Bm_scaf18 2 0 385183 385296 - 307 385163 385316	-	4	0	FASTA:47-69	CTCCTGTGCAATAATTACGCCGG	49
BM_gRNA_1599	BMgn000346|Gene012665.0	Bm_scaf18 2 0 361813 361936 - 929 361793 361956	-	6	0	FASTA:54-76	TTGTGGAGCACCTGAGCAAAGGG	56
BM_gRNA_1600	BMgn000346|Gene012665.1	Bm_scaf18 2 124 359998 360492 - 929 359978 360512 Warning:CutS359688	-	5	0	FASTA:44-66	GAGTTTGCCTTCTTCTTGTCTGG	46
BM_gRNA_1601	BMgn000346|Gene012665.0	Bm_scaf18 2 0 361813 361936 - 929 361793 361956	-	5	0	FASTA:85-107	AACGTAGGATCTGAACATCTTGG	87
BM_gRNA_1602	BMgn000346|Gene012665.1	Bm_scaf18 2 124 359998 360492 - 929 359978 360512 Warning:CutS359688	-	5	0	FASTA:72-94	GAGCTGCATTCTCGGACTGTGGG	74
BM_gRNA_1603	BMgn000346|Gene012665.0	Bm_scaf18 2 0 361813 361936 - 929 361793 361956	-	5	0	FASTA:125-147	TACGCAAAGCTGTAGCCATCGGG	127
BM_gRNA_1604	BMgn000347|Gene012666.1	Bm_scaf18 3 151 332202 332333 - 2382 332182 332353	+	6	0	FASTA:29-51	GGCATTATCATGGGAGAGTTCGG	48
BM_gRNA_1605	BMgn000347|Gene012666.2	Bm_scaf18 3 283 330536 331840 - 2382 330516 331860 Warning:CutS329742	-	6	0	FASTA:153-175	CGGCAGACTGCAATGCGAACAGG	155
BM_gRNA_1606	BMgn000347|Gene012666.1	Bm_scaf18 3 151 332202 332333 - 2382 332182 332353	+	4	0	FASTA:86-108	GTGTACGCTACTGACGAAAATGG	105
BM_gRNA_1607	BMgn000347|Gene012666.2	Bm_scaf18 3 283 330536 331840 - 2382 330516 331860 Warning:CutS329742	+	6	0	FASTA:512-534	TCTACAATAGCGAACCAAGGTGG	531
BM_gRNA_1608	BMgn000347|Gene012666.2	Bm_scaf18 3 283 330536 331840 - 2382 330516 331860 Warning:CutS329742	-	6	0	FASTA:551-573	AAGCTATTCCTTAGTCCAGTTGG	553
BM_gRNA_1609	BMgn000348|Gene012667.3	Bm_scaf18 5 529 290486 290607 - 2617 290466 290627	+	5	0	FASTA:64-86	AGATTACATAGCTGACGACCAGG	83
BM_gRNA_1610	BMgn000348|Gene012667.3	Bm_scaf18 5 529 290486 290607 - 2617 290466 290627	+	4	0	FASTA:101-123	AAATCCAAAACTGTATATGTTGG	120
BM_gRNA_1611	BMgn000348|Gene012667.3	Bm_scaf18 5 529 290486 290607 - 2617 290466 290627	-	4	0	FASTA:82-104	ATTTGTATATTCTATAACCCTGG	84
BM_gRNA_1612	BMgn000348|Gene012667.3	Bm_scaf18 5 529 290486 290607 - 2617 290466 290627	+	4	0	FASTA:65-87	GATTACATAGCTGACGACCAGGG	84
BM_gRNA_1613	BMgn000348|Gene012667.4	Bm_scaf18 5 651 288055 289147 - 2617 288035 289167 Warning:CutS287182	+	6	0	FASTA:38-60	GAAAACCGCGCCCACAGACTCGG	57
BM_gRNA_1614	BMgn000349|Gene012670.0	Bm_scaf18 1 0 272565 273382 - 1227 272545 273402 Warning:CutS272156	-	5	0	FASTA:72-94	TTACATTTAGAATTCGTTAAAGG	74
BM_gRNA_1615	BMgn000349|Gene012670.0	Bm_scaf18 1 0 272565 273382 - 1227 272545 273402 Warning:CutS272156	+	5	0	FASTA:137-159	TGGATGTGCCATAATCAACGAGG	156
BM_gRNA_1616	BMgn000349|Gene012670.0	Bm_scaf18 1 0 272565 273382 - 1227 272545 273402 Warning:CutS272156	-	5	0	FASTA:548-570	CTATACTTTTACCTAGAAGGAGG	550
BM_gRNA_1617	BMgn000349|Gene012670.0	Bm_scaf18 1 0 272565 273382 - 1227 272545 273402 Warning:CutS272156	-	5	0	FASTA:630-652	CCACACATAGTGGAGAGTTCAGG	632
BM_gRNA_1618	BMgn000349|Gene012670.0	Bm_scaf18 1 0 272565 273382 - 1227 272545 273402 Warning:CutS272156	-	4	0	FASTA:24-46	GCACTTCTGCAAAGTATTCCTGG	26
BM_gRNA_1619	BMgn000350|Gene012671.0	Bm_scaf18 2 0 270304 270769 - 1005 270284 270789	+	5	0	FASTA:465-487	TGAACCCTCATTTAATGGTCAGG	484
BM_gRNA_1620	BMgn000350|Gene012671.1	Bm_scaf18 2 466 270017 270220 - 1005 269997 270240 Warning:CutS269682	-	6	0	FASTA:27-49	CATCCGTGATGTCTCTTTGCGGG	29
BM_gRNA_1621	BMgn000350|Gene012671.1	Bm_scaf18 2 466 270017 270220 - 1005 269997 270240 Warning:CutS269682	+	5	0	FASTA:58-80	CTTAGTGCTGGAACTGGGGCAGG	77
BM_gRNA_1622	BMgn000350|Gene012671.1	Bm_scaf18 2 466 270017 270220 - 1005 269997 270240 Warning:CutS269682	+	5	0	FASTA:87-109	GCTTTGGGCAAGACCACACATGG	106
BM_gRNA_1623	BMgn000350|Gene012671.1	Bm_scaf18 2 466 270017 270220 - 1005 269997 270240 Warning:CutS269682	-	5	0	FASTA:121-143	GCCCAAGAAAATCGACGTGCAGG	123
BM_gRNA_1624	BMgn000351|Gene012673.1	Bm_scaf18 2 45 257717 260905 - 4851 257697 260925 Warning:CutS256100	+	6	0	FASTA:714-736	GATGGGTGTGAGTATCGCCTTGG	733
BM_gRNA_1625	BMgn000351|Gene012673.1	Bm_scaf18 2 45 257717 260905 - 4851 257697 260925 Warning:CutS256100	-	6	0	FASTA:1075-1097	CTCAAACTGTACAGTACGACGGG	1077
BM_gRNA_1626	BMgn000351|Gene012673.1	Bm_scaf18 2 45 257717 260905 - 4851 257697 260925 Warning:CutS256100	-	5	0	FASTA:330-352	ACTCTAAGTCTGAGTGTATAAGG	332
BM_gRNA_1627	BMgn000351|Gene012673.1	Bm_scaf18 2 45 257717 260905 - 4851 257697 260925 Warning:CutS256100	-	5	0	FASTA:372-394	AACTCTTCCCGAAGATTATTAGG	374
BM_gRNA_1628	BMgn000351|Gene012673.1	Bm_scaf18 2 45 257717 260905 - 4851 257697 260925 Warning:CutS256100	+	5	0	FASTA:487-509	TATCTTTGCAATCTGAACTGGGG	506
BM_gRNA_1629	BMgn000352|Gene012675.0	Bm_scaf18 9 0 243076 243191 - 1362 243056 243211	-	6	0	FASTA:99-121	TGCAGTAATTCATCATCGACAGG	101
BM_gRNA_1630	BMgn000352|Gene012675.1	Bm_scaf18 9 116 242533 242710 - 1362 242513 242730	-	5	0	FASTA:40-62	AGCATTTCGGCAGCTCGTTCCGG	42
BM_gRNA_1631	BMgn000352|Gene012675.2	Bm_scaf18 9 294 242271 242416 - 1362 242251 242436	+	5	0	FASTA:40-62	CATTATTCTACGACTGCGTGTGG	59
BM_gRNA_1632	BMgn000352|Gene012675.0	Bm_scaf18 9 0 243076 243191 - 1362 243056 243211	+	4	0	FASTA:23-45	GGTATTTTCAGGTCTCGATACGG	42
BM_gRNA_1633	BMgn000352|Gene012675.1	Bm_scaf18 9 116 242533 242710 - 1362 242513 242730	-	5	0	FASTA:107-129	CGGCTCCGCTAAGTATTCAGCGG	109
BM_gRNA_1634	BMgn000353|Gene012678.1	Bm_scaf18 4 326 170548 170696 - 728 170528 170716	+	6	0	FASTA:35-57	AGAATTGACGACTCTGAGATCGG	54
BM_gRNA_1635	BMgn000353|Gene012678.1	Bm_scaf18 4 326 170548 170696 - 728 170528 170716	+	6	0	FASTA:119-141	ATTCATAACCCGTGGAGATATGG	138
BM_gRNA_1636	BMgn000353|Gene012678.1	Bm_scaf18 4 326 170548 170696 - 728 170528 170716	+	5	0	FASTA:66-88	CTCCTGGAAATGGTGGCTTTTGG	85
BM_gRNA_1637	BMgn000353|Gene012678.1	Bm_scaf18 4 326 170548 170696 - 728 170528 170716	+	5	0	FASTA:50-72	GAGATCGGTCGTGTCACTCCTGG	69
BM_gRNA_1638	BMgn000353|Gene012678.1	Bm_scaf18 4 326 170548 170696 - 728 170528 170716	+	5	0	FASTA:130-152	GTGGAGATATGGAAGTAAGATGG	149
BM_gRNA_1639	BMgn000354|Gene012682.0	Bm_scaf18 1 0 162039 163320 - 1924 162019 163340 Warning:CutS161397	+	6	0	FASTA:531-553	GGTAATGGCCGTTACTACCAAGG	550
BM_gRNA_1640	BMgn000354|Gene012682.0	Bm_scaf18 1 0 162039 163320 - 1924 162019 163340 Warning:CutS161397	+	6	0	FASTA:574-596	CTGGTTTAGCTTGTCAGGCTTGG	593
BM_gRNA_1641	BMgn000354|Gene012682.0	Bm_scaf18 1 0 162039 163320 - 1924 162019 163340 Warning:CutS161397	-	6	0	FASTA:720-742	CAATACTGCCATCTCACGTTTGG	722
BM_gRNA_1642	BMgn000354|Gene012682.0	Bm_scaf18 1 0 162039 163320 - 1924 162019 163340 Warning:CutS161397	+	6	0	FASTA:1080-1102	GATTTGGGTCAAGGGGCCTTTGG	1099
BM_gRNA_1643	BMgn000354|Gene012682.0	Bm_scaf18 1 0 162039 163320 - 1924 162019 163340 Warning:CutS161397	-	5	0	FASTA:121-143	GTGGTTGTACCATACGTAGCCGG	123
BM_gRNA_1644	BMgn000355|Gene012680.1	Bm_scaf18 9 460 158255 158384 - 1748 158235 158404	+	5	0	FASTA:75-97	CTAGCAAGATTAGTCGTCAGAGG	94
BM_gRNA_1645	BMgn000355|Gene012680.2	Bm_scaf18 9 590 156990 157106 - 1748 156970 157126	+	4	0	FASTA:94-116	CAAAAATGACAAATTCATTCAGG	113
BM_gRNA_1646	BMgn000355|Gene012680.1	Bm_scaf18 9 460 158255 158384 - 1748 158235 158404	+	5	0	FASTA:121-143	TCATTGTTGATATGCTGGTCAGG	140
BM_gRNA_1647	BMgn000355|Gene012680.1	Bm_scaf18 9 460 158255 158384 - 1748 158235 158404	-	4	0	FASTA:57-79	GCTAGCTGTTTTAAACTACTAGG	59
BM_gRNA_1648	BMgn000355|Gene012680.1	Bm_scaf18 9 460 158255 158384 - 1748 158235 158404	+	5	0	FASTA:92-114	CAGAGGCTTCTACACAATAGAGG	111
BM_gRNA_1649	BMgn000356|Gene012686.3	Bm_scaf18 9 556 111380 111485 - 1442 111360 111505	-	4	0	FASTA:41-63	TTACTATATCAGTATCACTGTGG	43
BM_gRNA_1650	BMgn000356|Gene012686.3	Bm_scaf18 9 556 111380 111485 - 1442 111360 111505	+	4	0	FASTA:105-127	GGAATTTTGAAGCATGAAAAAGG	124
BM_gRNA_1651	BMgn000356|Gene012686.4	Bm_scaf18 9 662 110764 110943 - 1442 110744 110963	-	5	0	FASTA:130-152	AGTAAGGACAAATATCTTGCCGG	132
BM_gRNA_1652	BMgn000356|Gene012686.4	Bm_scaf18 9 662 110764 110943 - 1442 110744 110963	-	4	0	FASTA:50-72	TTTAAGACTTTCGGCTTTATCGG	52
BM_gRNA_1653	BMgn000356|Gene012686.4	Bm_scaf18 9 662 110764 110943 - 1442 110744 110963	+	4	0	FASTA:111-133	AAAAACGATCTCATAAGATCCGG	130
BM_gRNA_1654	BMgn000357|Gene012687.1	Bm_scaf18 5 36 105211 105573 - 1021 105191 105593	-	5	0	FASTA:222-244	GGCTCCGTGTAGTAAGGATTCGG	224
BM_gRNA_1655	BMgn000357|Gene012687.1	Bm_scaf18 5 36 105211 105573 - 1021 105191 105593	-	5	0	FASTA:251-273	ATTCTTCTGGGCTCGTGTCTGGG	253
BM_gRNA_1656	BMgn000357|Gene012687.1	Bm_scaf18 5 36 105211 105573 - 1021 105191 105593	-	5	0	FASTA:277-299	GGCGTAATCAACTATTAAAGCGG	279
BM_gRNA_1657	BMgn000357|Gene012687.1	Bm_scaf18 5 36 105211 105573 - 1021 105191 105593	+	5	0	FASTA:341-363	TGAAACGAGAACGCGAAAAAGGG	360
BM_gRNA_1658	BMgn000357|Gene012687.1	Bm_scaf18 5 36 105211 105573 - 1021 105191 105593	+	4	0	FASTA:179-201	AAGAGCAAGAAATGACGTTTTGG	198
BM_gRNA_1659	BMgn000358|Gene012689.0	Bm_scaf18 13 0 84366 84405 - 2916 84346 84425	+	5	0	FASTA:34-56	CCGAACACATTTTGAATCGAAGG	53
BM_gRNA_1660	BMgn000358|Gene012689.1	Bm_scaf18 13 40 83955 84234 - 2916 83935 84254	-	5	0	FASTA:138-160	CGTAGGCACAGTTTTGTAGGAGG	140
BM_gRNA_1661	BMgn000358|Gene012689.2	Bm_scaf18 13 320 83253 83384 - 2916 83233 83404	-	5	0	FASTA:65-87	GTGACGTATGACTCTTAAAGCGG	67
BM_gRNA_1662	BMgn000358|Gene012689.1	Bm_scaf18 13 40 83955 84234 - 2916 83935 84254	+	5	0	FASTA:161-183	GAATACAGGTCAGGATTTAGAGG	180
BM_gRNA_1663	BMgn000358|Gene012689.2	Bm_scaf18 13 320 83253 83384 - 2916 83233 83404	+	4	0	FASTA:30-52	TAGTCTTGTGGATGAGTCTATGG	49
BM_gRNA_1664	BMgn000359|Gene012690.1	Bm_scaf18 10 51 72934 73198 - 2424 72914 73218	+	6	0	FASTA:216-238	GCGACTGCGTTCTATGTTCTCGG	235
BM_gRNA_1665	BMgn000359|Gene012690.2	Bm_scaf18 10 316 71955 72516 - 2424 71935 72536	+	6	0	FASTA:363-385	GTCCGATGCTATCGGAGTCTCGG	382
BM_gRNA_1666	BMgn000359|Gene012690.1	Bm_scaf18 10 51 72934 73198 - 2424 72914 73218	-	5	0	FASTA:103-125	CAGTTGCAGTCCAGAGGGCGCGG	105
BM_gRNA_1667	BMgn000359|Gene012690.2	Bm_scaf18 10 316 71955 72516 - 2424 71935 72536	-	6	0	FASTA:534-556	ATCACAGCTGCTCACGCCGCTGG	536
BM_gRNA_1668	BMgn000359|Gene012690.1	Bm_scaf18 10 51 72934 73198 - 2424 72914 73218	+	5	0	FASTA:134-156	TTTGAGCAACGGTTATCTAGAGG	153
BM_gRNA_1669	BMgn000360|Gene012692.0	Bm_scaf18 3 0 45736 46032 + 837 45716 46052	+	5	0	FASTA:216-238	CCGATGACCACCGAAGAAAATGG	235
BM_gRNA_1670	BMgn000360|Gene012692.1	Bm_scaf18 3 297 46120 46361 + 837 46100 46381	+	5	0	FASTA:66-88	TAGATTTGGACTCGAGACTCGGG	85
BM_gRNA_1671	BMgn000360|Gene012692.0	Bm_scaf18 3 0 45736 46032 + 837 45716 46052	-	5	0	FASTA:267-289	TAGCTCTGCTTTCAAACGCTCGG	269
BM_gRNA_1672	BMgn000360|Gene012692.1	Bm_scaf18 3 297 46120 46361 + 837 46100 46381	+	5	0	FASTA:113-135	ACGCCAACGTCCCAATCTGGAGG	132
BM_gRNA_1673	BMgn000360|Gene012692.1	Bm_scaf18 3 297 46120 46361 + 837 46100 46381	-	4	0	FASTA:21-43	AAGTTCACGTTTGACTGGAGTGG	23
BM_gRNA_1674	BMgn000361|Gene012691.0	Bm_scaf18 1 0 51032 51671 + 960 51012 51691 Warning:CutE51991	-	6	0	FASTA:486-508	AGCAATCATGCGAATAGCAGTGG	488
BM_gRNA_1675	BMgn000361|Gene012691.0	Bm_scaf18 1 0 51032 51671 + 960 51012 51691 Warning:CutE51991	-	5	0	FASTA:213-235	AAGGGACAGCTTTTCGTCTTTGG	215
BM_gRNA_1676	BMgn000361|Gene012691.0	Bm_scaf18 1 0 51032 51671 + 960 51012 51691 Warning:CutE51991	-	5	0	FASTA:348-370	TAAAGGTTTCACTTCTAGTAGGG	350
BM_gRNA_1677	BMgn000361|Gene012691.0	Bm_scaf18 1 0 51032 51671 + 960 51012 51691 Warning:CutE51991	-	5	0	FASTA:398-420	GGTATTCGTGGATTCTTACAGGG	400
BM_gRNA_1678	BMgn000361|Gene012691.0	Bm_scaf18 1 0 51032 51671 + 960 51012 51691 Warning:CutE51991	-	5	0	FASTA:599-621	GAATATTTGTCATCGGGTATTGG	601
BM_gRNA_1679	BMgn000362|Gene012688.1	Bm_scaf18 9 295 93765 93856 + 2880 93745 93876	+	5	0	FASTA:28-50	GTAATGATGGACTACCTGAAAGG	47
BM_gRNA_1680	BMgn000362|Gene012688.2	Bm_scaf18 9 387 94270 94594 + 2880 94250 94614	-	5	0	FASTA:56-78	CTTTGTTAGTACATTGCCTTTGG	58
BM_gRNA_1681	BMgn000362|Gene012688.1	Bm_scaf18 9 295 93765 93856 + 2880 93745 93876	+	5	0	FASTA:91-113	TGCTCAAGACAGTTGCTGAGAGG	110
BM_gRNA_1682	BMgn000362|Gene012688.2	Bm_scaf18 9 387 94270 94594 + 2880 94250 94614	+	5	0	FASTA:252-274	TTCTACTATGGATGCACCAAAGG	271
BM_gRNA_1683	BMgn000362|Gene012688.1	Bm_scaf18 9 295 93765 93856 + 2880 93745 93876	-	4	0	FASTA:56-78	CCAAAGTCGTGCAACACTTAAGG	58
BM_gRNA_1684	BMgn000363|Gene012685.1	Bm_scaf18 2 12 124447 124756 + 483 124427 124776 Warning:CutE124917	-	6	0	FASTA:61-83	GCGGCAGAGCGGGGAGGCTGCGG	63
BM_gRNA_1685	BMgn000363|Gene012685.1	Bm_scaf18 2 12 124447 124756 + 483 124427 124776 Warning:CutE124917	-	5	0	FASTA:30-52	GATAAGCGATGTGAGGCCGCGGG	32
BM_gRNA_1686	BMgn000363|Gene012685.1	Bm_scaf18 2 12 124447 124756 + 483 124427 124776 Warning:CutE124917	-	5	0	FASTA:93-115	GGCCCGCTCGTCGCGCCCAGCGG	95
BM_gRNA_1687	BMgn000363|Gene012685.1	Bm_scaf18 2 12 124447 124756 + 483 124427 124776 Warning:CutE124917	-	5	0	FASTA:181-203	CGTCGTAGGCTCTTGAACACAGG	183
BM_gRNA_1688	BMgn000363|Gene012685.1	Bm_scaf18 2 12 124447 124756 + 483 124427 124776 Warning:CutE124917	-	5	0	FASTA:286-308	GGCTTGCGTGAAGCCGAGCTTGG	288
BM_gRNA_1689	BMgn000364|Gene012683.0	Bm_scaf18 6 0 144409 144768 + 1029 144389 144788	+	5	0	FASTA:94-116	ACTTCGTAAACGATGGACCTTGG	113
BM_gRNA_1690	BMgn000364|Gene012683.1	Bm_scaf18 6 360 145051 145245 + 1029 145031 145265	+	5	0	FASTA:89-111	AAAAATTAAATCTGGAAAGGGGG	108
BM_gRNA_1691	BMgn000364|Gene012683.2	Bm_scaf18 6 555 145987 146048 + 1029 145967 146068	+	4	0	FASTA:60-82	TTTACTCAGCTCTTTGACAATGG	79
BM_gRNA_1692	BMgn000364|Gene012683.0	Bm_scaf18 6 0 144409 144768 + 1029 144389 144788	-	5	0	FASTA:162-184	TGCACTACACGTTCTTGATGAGG	164
BM_gRNA_1693	BMgn000364|Gene012683.1	Bm_scaf18 6 360 145051 145245 + 1029 145031 145265	+	5	0	FASTA:111-133	GCCAGTTCGTTCCGTGATGAAGG	130
BM_gRNA_1694	BMgn000365|Gene012679.0	Bm_scaf18 4 0 166027 166072 + 546 166007 166092	+	4	0	FASTA:45-67	GTTGTGGTCCTCGGTGATTCAGG	64
BM_gRNA_1695	BMgn000365|Gene012679.1	Bm_scaf18 4 46 167290 167499 + 546 167270 167519	+	6	0	FASTA:59-81	AATAAGCCCATTTTATCGCCGGG	78
BM_gRNA_1696	BMgn000365|Gene012679.2	Bm_scaf18 4 256 167890 167997 + 546 167870 168017 Warning:CutE168035	+	4	0	FASTA:57-79	GTCAAGTGAATCTTCAGAAGTGG	76
BM_gRNA_1697	BMgn000365|Gene012679.0	Bm_scaf18 4 0 166027 166072 + 546 166007 166092	+	4	0	FASTA:23-45	GGCTGCGATTGAGAAAGTGAAGG	42
BM_gRNA_1698	BMgn000365|Gene012679.1	Bm_scaf18 4 46 167290 167499 + 546 167270 167519	+	6	0	FASTA:82-104	ATGGACGGTCGGTTGCTCTGTGG	101
BM_gRNA_1699	BMgn000366|Gene012677.0	Bm_scaf18 18 0 218321 218558 + 3267 218301 218578	+	5	0	FASTA:50-72	TGAAGCGTTTTGGCAGACCCTGG	69
BM_gRNA_1700	BMgn000366|Gene012677.1	Bm_scaf18 18 238 218639 218867 + 3267 218619 218887	+	4	0	FASTA:117-139	ACCAGCATAATCGTTACATTTGG	136
BM_gRNA_1701	BMgn000366|Gene012677.2	Bm_scaf18 18 467 218940 219144 + 3267 218920 219164	+	4	0	FASTA:30-52	TTATGGTGGAAATAGTGTGGAGG	49
BM_gRNA_1702	BMgn000366|Gene012677.0	Bm_scaf18 18 0 218321 218558 + 3267 218301 218578	-	5	0	FASTA:134-156	TACATATAGAGTGGAAAACGAGG	136
BM_gRNA_1703	BMgn000366|Gene012677.1	Bm_scaf18 18 238 218639 218867 + 3267 218619 218887	-	4	1	FASTA:156-178	GAGAGCGAGAACATTAACAAAGG	158
BM_gRNA_1704	BMgn000367|Gene012672.1	Bm_scaf18 6 265 265452 265640 + 1140 265432 265660	-	5	0	FASTA:24-46	GCCTGAAATTCTTCAGCAACAGG	26
BM_gRNA_1705	BMgn000367|Gene012672.2	Bm_scaf18 6 454 266003 266167 + 1140 265983 266187	-	6	0	FASTA:64-86	GTTAGGCCCAGGCTTGTCGCTGG	66
BM_gRNA_1706	BMgn000367|Gene012672.1	Bm_scaf18 6 265 265452 265640 + 1140 265432 265660	-	5	0	FASTA:49-71	AATCTCGACCTCATCAGCCCAGG	51
BM_gRNA_1707	BMgn000367|Gene012672.2	Bm_scaf18 6 454 266003 266167 + 1140 265983 266187	-	6	0	FASTA:133-155	GCGTTGACTCTCTTCCTTACTGG	135
BM_gRNA_1708	BMgn000367|Gene012672.1	Bm_scaf18 6 265 265452 265640 + 1140 265432 265660	-	5	0	FASTA:74-96	AAGGTGGTGGAAGTACACCTTGG	76
BM_gRNA_1709	BMgn000368|Gene012668.0	Bm_scaf18 8 0 278245 278480 + 1923 278225 278500	-	6	0	FASTA:85-107	ACACATTTCCTCGCCCGGTAGGG	87
BM_gRNA_1710	BMgn000368|Gene012668.1	Bm_scaf18 8 236 281422 281653 + 1923 281402 281673	-	5	0	FASTA:128-150	AACACCGCCTCAATGTCATCCGG	130
BM_gRNA_1711	BMgn000368|Gene012668.2	Bm_scaf18 8 468 283249 283433 + 1923 283229 283453	-	6	0	FASTA:28-50	CTTCTGAGTCTCCACCAATCGGG	30
BM_gRNA_1712	BMgn000368|Gene012668.0	Bm_scaf18 8 0 278245 278480 + 1923 278225 278500	+	5	0	FASTA:148-170	GCCAGTAAGGTCAATGAACAGGG	167
BM_gRNA_1713	BMgn000368|Gene012668.1	Bm_scaf18 8 236 281422 281653 + 1923 281402 281673	-	5	0	FASTA:170-192	GCGGTATGACTGCGCCTCGCTGG	172
BM_gRNA_1714	BMgn000369|Gene012664.0	Bm_scaf18 2 0 379875 380008 + 336 379855 380028	-	6	0	FASTA:32-54	AGACAATGGCCAGGGCGGCAAGG	34
BM_gRNA_1715	BMgn000369|Gene012664.1	Bm_scaf18 2 134 380997 381086 + 336 380977 381106 Warning:CutE381198	-	6	0	FASTA:93-115	ATTTGTAGCTACCCCTCACCAGG	95
BM_gRNA_1716	BMgn000369|Gene012664.0	Bm_scaf18 2 0 379875 380008 + 336 379855 380028	-	6	0	FASTA:78-100	GGTGCTTTCTGTCCCTGAGGTGG	80
BM_gRNA_1717	BMgn000369|Gene012664.1	Bm_scaf18 2 134 380997 381086 + 336 380977 381106 Warning:CutE381198	+	5	0	FASTA:26-48	AGACAAGCGACGGTACATCCAGG	45
BM_gRNA_1718	BMgn000369|Gene012664.1	Bm_scaf18 2 134 380997 381086 + 336 380977 381106 Warning:CutE381198	+	4	0	FASTA:67-89	AAGAACGACACTGACCAGCAAGG	86
BM_gRNA_1719	BMgn000370|Gene012662.0	Bm_scaf18 1 0 409411 409558 + 222 409391 409578 Warning:CutE409632	-	6	0	FASTA:30-52	AGTACTCTGCGTAGTGGTGCTGG	32
BM_gRNA_1720	BMgn000370|Gene012662.0	Bm_scaf18 1 0 409411 409558 + 222 409391 409578 Warning:CutE409632	+	4	0	FASTA:111-133	TACGAAGAATACGACAAAGATGG	130
BM_gRNA_1721	BMgn000370|Gene012662.0	Bm_scaf18 1 0 409411 409558 + 222 409391 409578 Warning:CutE409632	+	5	1	FASTA:77-99	GAGGAGTAAGCCCAAAAAAGTGG	96
BM_gRNA_1722	BMgn000370|Gene012662.0	Bm_scaf18 1 0 409411 409558 + 222 409391 409578 Warning:CutE409632	+	3	1	FASTA:42-64	CGCAGAGTACTAATCATAAACGG	61
BM_gRNA_1723	BMgn000370|Gene012662.0	Bm_scaf18 1 0 409411 409558 + 222 409391 409578 Warning:CutE409632	-	6	0	FASTA:36-58	ATGATTAGTACTCTGCGTAGTGG	38
BM_gRNA_1724	BMgn000371|Gene012648.0	Bm_scaf18 3 0 555863 556513 + 977 555843 556533 Warning:CutE556568	+	5	0	FASTA:103-125	TTTGCTTGTCGTGACTAGTTTGG	122
BM_gRNA_1725	BMgn000371|Gene012648.0	Bm_scaf18 3 0 555863 556513 + 977 555843 556533 Warning:CutE556568	+	5	0	FASTA:133-155	TGATAACAGTAGTCAGGATGAGG	152
BM_gRNA_1726	BMgn000371|Gene012648.0	Bm_scaf18 3 0 555863 556513 + 977 555843 556533 Warning:CutE556568	-	5	0	FASTA:194-216	AGTGGGTTATAGTCCACATTTGG	196
BM_gRNA_1727	BMgn000371|Gene012648.0	Bm_scaf18 3 0 555863 556513 + 977 555843 556533 Warning:CutE556568	-	5	0	FASTA:488-510	TGACGGCGTCTACCTTTTGAAGG	490
BM_gRNA_1728	BMgn000371|Gene012648.0	Bm_scaf18 3 0 555863 556513 + 977 555843 556533 Warning:CutE556568	-	5	0	FASTA:566-588	TGTGATGGAGTTATCGTAAAAGG	568
BM_gRNA_1729	BMgn000372|Gene012628.1	Bm_scaf18 2 36 807785 807862 + 171 807765 807882 Warning:CutE807919	+	4	0	FASTA:26-48	CTACACATCAGATTTACCTATGG	45
BM_gRNA_1730	BMgn000372|Gene012628.0	Bm_scaf18 2 0 806918 806953 + 171 806898 806973	+	3	0	FASTA:35-57	AGCCAAGATGAACAACAGTATGG	54
BM_gRNA_1731	BMgn000372|Gene012628.1	Bm_scaf18 2 36 807785 807862 + 171 807765 807882 Warning:CutE807919	+	3	0	FASTA:50-72	TGCTCAGGTTGTGTTGCAACAGG	69
BM_gRNA_1732	BMgn000372|Gene012628.1	Bm_scaf18 2 36 807785 807862 + 171 807765 807882 Warning:CutE807919	+	4	0	FASTA:35-57	AGATTTACCTATGGATGCTCAGG	54
BM_gRNA_1733	BMgn000372|Gene012628.1	Bm_scaf18 2 36 807785 807862 + 171 807765 807882 Warning:CutE807919	-	3	0	FASTA:42-64	AACACAACCTGAGCATCCATAGG	44
BM_gRNA_1734	BMgn000373|Gene012627.0	Bm_scaf18 7 0 815170 815687 + 1218 815150 815707	-	5	0	FASTA:50-72	GAGGTAGAGGTCCGTTATTTTGG	52
BM_gRNA_1735	BMgn000373|Gene012627.1	Bm_scaf18 7 518 815760 815857 + 1218 815740 815877	-	4	0	FASTA:61-83	GGTACTCGTTGTACAGGCCTTGG	63
BM_gRNA_1736	BMgn000373|Gene012627.2	Bm_scaf18 7 616 815930 816078 + 1218 815910 816098	-	4	0	FASTA:35-57	GTTTGTTCTGAAGGCCCACTTGG	37
BM_gRNA_1737	BMgn000373|Gene012627.0	Bm_scaf18 7 0 815170 815687 + 1218 815150 815707	-	5	0	FASTA:149-171	TGTCATTTGCGTTGTTCGGTTGG	151
BM_gRNA_1738	BMgn000373|Gene012627.1	Bm_scaf18 7 518 815760 815857 + 1218 815740 815877	-	4	0	FASTA:95-117	ATGTTGGGAAAGTTGTGGTTGGG	97
BM_gRNA_1739	BMgn000374|Gene012626.0	Bm_scaf18 3 0 839720 840069 + 697 839700 840089	+	5	0	FASTA:282-304	GGCATCAGTCACGGGTATATCGG	301
BM_gRNA_1740	BMgn000374|Gene012626.1	Bm_scaf18 3 350 840310 840423 + 697 840290 840443 Warning:CutE840446	+	6	0	FASTA:25-47	ACATGGTGGTGCTGAGCTTGGGG	44
BM_gRNA_1741	BMgn000374|Gene012626.1	Bm_scaf18 3 350 840310 840423 + 697 840290 840443 Warning:CutE840446	+	6	0	FASTA:63-85	TTGCATTAAGAGCCTTAGGATGG	82
BM_gRNA_1742	BMgn000374|Gene012626.1	Bm_scaf18 3 350 840310 840423 + 697 840290 840443 Warning:CutE840446	+	5	0	FASTA:92-114	CTGTATGCTGTTGCAGGTACTGG	111
BM_gRNA_1743	BMgn000374|Gene012626.1	Bm_scaf18 3 350 840310 840423 + 697 840290 840443 Warning:CutE840446	+	4	1	FASTA:114-136	GTTTCCTTTGCTATGGCATTTGG	133
BM_gRNA_1744	BMgn000375|Gene012624.0	Bm_scaf18 2 0 849045 849166 + 669 849025 849186	-	6	0	FASTA:96-118	ACTTTGCTGTATCTGACCATCGG	98
BM_gRNA_1745	BMgn000375|Gene012624.1	Bm_scaf18 2 122 849537 849860 + 669 849517 849880 Warning:CutE850083	+	6	0	FASTA:123-145	TCCTGTGATAGCCCAATTTGCGG	142
BM_gRNA_1746	BMgn000375|Gene012624.1	Bm_scaf18 2 122 849537 849860 + 669 849517 849880 Warning:CutE850083	+	6	0	FASTA:186-208	TTATCCATATGTCGACGGGGTGG	205
BM_gRNA_1747	BMgn000375|Gene012624.1	Bm_scaf18 2 122 849537 849860 + 669 849517 849880 Warning:CutE850083	+	6	0	FASTA:215-237	ATTGTGGGTGTCCTCAGAAATGG	234
BM_gRNA_1748	BMgn000375|Gene012624.1	Bm_scaf18 2 122 849537 849860 + 669 849517 849880 Warning:CutE850083	+	4	0	FASTA:147-169	TAATAATCGAGACGATTTCGTGG	166
BM_gRNA_1749	BMgn000376|Gene012622.0	Bm_scaf18 1 0 858430 858631 + 303 858410 858651 Warning:CutE858732	-	6	0	FASTA:146-168	CGGGTAGCCGTGGTCGCCAAGGG	148
BM_gRNA_1750	BMgn000376|Gene012622.0	Bm_scaf18 1 0 858430 858631 + 303 858410 858651 Warning:CutE858732	+	4	0	FASTA:35-57	AAGTTCATTGCTTATTAGTCTGG	54
BM_gRNA_1751	BMgn000376|Gene012622.0	Bm_scaf18 1 0 858430 858631 + 303 858410 858651 Warning:CutE858732	-	4	0	FASTA:180-202	TCTTTGAATTTCCTGCGAAAAGG	182
BM_gRNA_1752	BMgn000376|Gene012622.0	Bm_scaf18 1 0 858430 858631 + 303 858410 858651 Warning:CutE858732	+	4	0	FASTA:130-152	ATCATGTTCTAGAGAACCCTTGG	149
BM_gRNA_1753	BMgn000376|Gene012622.0	Bm_scaf18 1 0 858430 858631 + 303 858410 858651 Warning:CutE858732	-	5	0	FASTA:165-187	CGAAAAGGCTTCGCATCTACGGG	167
BM_gRNA_1754	BMgn000377|Gene012618.1	Bm_scaf18 5 255 959910 960046 + 3308 959890 960066	+	5	0	FASTA:82-104	CAAGTGGTTCAACGTGGCGAAGG	101
BM_gRNA_1755	BMgn000377|Gene012618.2	Bm_scaf18 5 392 961053 961222 + 3308 961033 961242	+	6	0	FASTA:25-47	TGCTACAAATGCCAGGGTTCAGG	44
BM_gRNA_1756	BMgn000377|Gene012618.1	Bm_scaf18 5 255 959910 960046 + 3308 959890 960066	-	5	0	FASTA:123-145	AACATCTTGGCCGCCGTCGTCGG	125
BM_gRNA_1757	BMgn000377|Gene012618.2	Bm_scaf18 5 392 961053 961222 + 3308 961033 961242	+	5	0	FASTA:75-97	GAGTGCAAGGAGTCAGATAAGGG	94
BM_gRNA_1758	BMgn000377|Gene012618.2	Bm_scaf18 5 392 961053 961222 + 3308 961033 961242	-	5	0	FASTA:123-145	CCATGACAATCGGTTCCATTGGG	125
BM_gRNA_1759	BMgn000378|Gene012616.0	Bm_scaf18 16 0 987747 987856 + 2340 987727 987876	-	6	0	FASTA:54-76	CGGTACGCCTTGCGCAGTATGGG	56
BM_gRNA_1760	BMgn000378|Gene012616.1	Bm_scaf18 16 110 990589 990773 + 2340 990569 990793	+	5	0	FASTA:53-75	GTGGCGCTGGTACAGTGAAATGG	72
BM_gRNA_1761	BMgn000378|Gene012616.2	Bm_scaf18 16 295 992282 992400 + 2340 992262 992420	+	6	0	FASTA:22-44	TACTCGTATTGGTCAAGCCTCGG	41
BM_gRNA_1762	BMgn000378|Gene012616.0	Bm_scaf18 16 0 987747 987856 + 2340 987727 987876	-	6	0	FASTA:90-112	CGGCGGCGAGAGTTCTGCCACGG	92
BM_gRNA_1763	BMgn000378|Gene012616.1	Bm_scaf18 16 110 990589 990773 + 2340 990569 990793	-	5	0	FASTA:100-122	TGAATGCATGTGATATTGACCGG	102
BM_gRNA_1764	BMgn000379|Gene012615.0	Bm_scaf18 22 0 1047681 1048574 + 4797 1047661 1048594	+	7	0	FASTA:77-99	GGTCAAGCCTGCTTCAGCCTCGG	96
BM_gRNA_1765	BMgn000379|Gene012615.1	Bm_scaf18 22 894 1052749 1052897 + 4797 1052729 1052917	-	6	0	FASTA:75-97	GAATTCATTGCGCTTTCACCAGG	77
BM_gRNA_1766	BMgn000379|Gene012615.2	Bm_scaf18 22 1043 1057117 1057396 + 4797 1057097 1057416	+	5	0	FASTA:68-90	AGCTAGCACGCAAACGTGGTTGG	87
BM_gRNA_1767	BMgn000379|Gene012615.0	Bm_scaf18 22 0 1047681 1048574 + 4797 1047661 1048594	-	7	0	FASTA:209-231	GCGCTCCTAACGCCGCTAAGTGG	211
BM_gRNA_1768	BMgn000379|Gene012615.1	Bm_scaf18 22 894 1052749 1052897 + 4797 1052729 1052917	+	6	0	FASTA:99-121	CCTTACAAAGGCAAGCAGACTGG	118
BM_gRNA_1769	BMgn000380|Gene012613.0	Bm_scaf18 2 0 1112465 1112582 + 492 1112445 1112602	-	5	0	FASTA:55-77	GCCGGCTGGGAGGGCTACGTCGG	57
BM_gRNA_1770	BMgn000380|Gene012613.1	Bm_scaf18 2 118 1112843 1113052 + 492 1112823 1113072 Warning:CutE1113216	+	6	0	FASTA:187-209	GGGCGACGCCCGCTCGCCGGCGG	206
BM_gRNA_1771	BMgn000380|Gene012613.0	Bm_scaf18 2 0 1112465 1112582 + 492 1112445 1112602	-	5	0	FASTA:80-102	CGCGCACGGACAATACGGCGCGG	82
BM_gRNA_1772	BMgn000380|Gene012613.1	Bm_scaf18 2 118 1112843 1113052 + 492 1112823 1113072 Warning:CutE1113216	+	5	0	FASTA:20-42	GTAAAATCTCGTATGTCGTACGG	39
BM_gRNA_1773	BMgn000380|Gene012613.0	Bm_scaf18 2 0 1112465 1112582 + 492 1112445 1112602	+	5	0	FASTA:111-133	GCTGTAGTTGCAGCAATCCATGG	130
BM_gRNA_1774	BMgn000381|Gene012610.0	Bm_scaf18 8 0 1127990 1128186 + 1322 1127970 1128206	+	6	0	FASTA:166-188	TGATTCCATGCTCCTAGCTATGG	185
BM_gRNA_1775	BMgn000381|Gene012610.1	Bm_scaf18 8 197 1129103 1129180 + 1322 1129083 1129200	-	5	0	FASTA:77-99	CCTGCTCCCATTCCCCTTCACGG	79
BM_gRNA_1776	BMgn000381|Gene012610.2	Bm_scaf18 8 275 1130259 1130481 + 1322 1130239 1130501	+	4	0	FASTA:55-77	AAGCATGTGATGAAGCTAATAGG	74
BM_gRNA_1777	BMgn000381|Gene012610.2	Bm_scaf18 8 275 1130259 1130481 + 1322 1130239 1130501	-	4	0	FASTA:165-187	GTGAGTTCAGTTACAGTAGCAGG	167
BM_gRNA_1778	BMgn000381|Gene012610.2	Bm_scaf18 8 275 1130259 1130481 + 1322 1130239 1130501	+	4	0	FASTA:191-213	TCAGGAAGCAGAGAAGTTAAAGG	210
BM_gRNA_1779	BMgn000383|Gene012609.0	Bm_scaf18 7 0 1161354 1161623 + 1770 1161334 1161643	+	6	0	FASTA:264-286	TTTGCTATAGGGCTAATCCTCGG	283
BM_gRNA_1780	BMgn000383|Gene012609.1	Bm_scaf18 7 270 1161780 1161975 + 1770 1161760 1161995	+	6	0	FASTA:180-202	GTAACTAGAATGCTCCCTGGTGG	199
BM_gRNA_1781	BMgn000383|Gene012609.2	Bm_scaf18 7 466 1162307 1162659 + 1770 1162287 1162679	+	6	0	FASTA:200-222	TGCAAAAGCTTAGAAGTCGGAGG	219
BM_gRNA_1782	BMgn000383|Gene012609.0	Bm_scaf18 7 0 1161354 1161623 + 1770 1161334 1161643	-	5	0	FASTA:216-238	AAATATTGAAGGCAGTGCTCGGG	218
BM_gRNA_1783	BMgn000383|Gene012609.1	Bm_scaf18 7 270 1161780 1161975 + 1770 1161760 1161995	-	5	0	FASTA:25-47	GATTACATTCTCTCTAGCATCGG	27
BM_gRNA_1784	BMgn000384|Gene012608.1	Bm_scaf18 4 505 1182704 1183204 + 1646 1182684 1183224	+	6	0	FASTA:372-394	TTGGAAAAACGACGGACCGTAGG	391
BM_gRNA_1785	BMgn000384|Gene012608.2	Bm_scaf18 4 1006 1185166 1185256 + 1646 1185146 1185276 Warning:CutE1185304	+	6	0	FASTA:71-93	CGAAGACGGTCTGAACGATGTGG	90
BM_gRNA_1786	BMgn000384|Gene012608.1	Bm_scaf18 4 505 1182704 1183204 + 1646 1182684 1183224	-	5	0	FASTA:78-100	TTGAAATCTTCGTTCCATACCGG	80
BM_gRNA_1787	BMgn000384|Gene012608.2	Bm_scaf18 4 1006 1185166 1185256 + 1646 1185146 1185276 Warning:CutE1185304	+	5	0	FASTA:26-48	AAACACTAAAGGCCAACTGGAGG	45
BM_gRNA_1788	BMgn000384|Gene012608.1	Bm_scaf18 4 505 1182704 1183204 + 1646 1182684 1183224	+	5	0	FASTA:263-285	TGCAAAAGTAGGAGATCAAGAGG	282
BM_gRNA_1789	BMgn000385|Gene012606.0	Bm_scaf18 5 0 1228964 1229078 + 894 1228944 1229098	+	5	0	FASTA:56-78	GCACTCGGCGTACTGCTATTTGG	75
BM_gRNA_1790	BMgn000385|Gene012606.1	Bm_scaf18 5 115 1230025 1230248 + 894 1230005 1230268	+	6	0	FASTA:31-53	ATTACAAGCCATGCCTCCACCGG	50
BM_gRNA_1791	BMgn000385|Gene012606.2	Bm_scaf18 5 339 1236223 1236425 + 894 1236203 1236445	+	6	0	FASTA:119-141	CCTGCTCCTGCGGAACTACGGGG	138
BM_gRNA_1792	BMgn000385|Gene012606.0	Bm_scaf18 5 0 1228964 1229078 + 894 1228944 1229098	+	4	0	FASTA:79-101	AAGGGAGTTTCTGTCACACGTGG	98
BM_gRNA_1793	BMgn000385|Gene012606.1	Bm_scaf18 5 115 1230025 1230248 + 894 1230005 1230268	-	6	0	FASTA:96-118	TCCTAGTCGACCACAGGAGTGGG	98
BM_gRNA_1794	BMgn000386|Gene012604.1	Bm_scaf18 8 169 1266723 1266896 + 1348 1266703 1266916	+	6	0	FASTA:110-132	GCAAGTTACGTGTGGTTGGATGG	129
BM_gRNA_1795	BMgn000386|Gene012604.2	Bm_scaf18 8 343 1267651 1267812 + 1348 1267631 1267832	+	6	0	FASTA:107-129	TACCACGACCCGTTTAGACGTGG	126
BM_gRNA_1796	BMgn000386|Gene012604.1	Bm_scaf18 8 169 1266723 1266896 + 1348 1266703 1266916	-	5	0	FASTA:36-58	TTTGTTCAAAGCAATCGGTGTGG	38
BM_gRNA_1797	BMgn000386|Gene012604.2	Bm_scaf18 8 343 1267651 1267812 + 1348 1267631 1267832	-	5	0	FASTA:26-48	CTGCCATCAAAGTACCAGATCGG	28
BM_gRNA_1798	BMgn000386|Gene012604.1	Bm_scaf18 8 169 1266723 1266896 + 1348 1266703 1266916	+	5	0	FASTA:136-158	TGGAATTAACCTCCGGTCAAAGG	155
BM_gRNA_1799	BMgn000387|Gene012602.0	Bm_scaf18 29 0 1335975 1336042 + 6288 1335955 1336062	+	4	0	FASTA:29-51	CAATCACGTCGAATATTTGCCGG	48
BM_gRNA_1800	BMgn000387|Gene012602.1	Bm_scaf18 29 68 1336140 1336596 + 6288 1336120 1336616	-	5	0	FASTA:161-183	ACGGTTATTTGAGATATCGATGG	163
BM_gRNA_1801	BMgn000387|Gene012602.2	Bm_scaf18 29 525 1336669 1336928 + 6288 1336649 1336948	-	5	0	FASTA:89-111	AAAATGTGTTGTCAGGTATTTGG	91
BM_gRNA_1802	BMgn000387|Gene012602.1	Bm_scaf18 29 68 1336140 1336596 + 6288 1336120 1336616	-	4	0	FASTA:124-146	TTGTTGGCAAATAGCTTTTCTGG	126
BM_gRNA_1803	BMgn000387|Gene012602.1	Bm_scaf18 29 68 1336140 1336596 + 6288 1336120 1336616	-	4	0	FASTA:196-218	AATCCTAAGAAACTATCTGATGG	198
BM_gRNA_1804	BMgn000388|Gene012600.1	Bm_scaf18 13 160 1406684 1406978 + 5330 1406664 1406998	-	7	0	FASTA:190-212	TTCACGCGCGGGTTCTACATGGG	192
BM_gRNA_1805	BMgn000388|Gene012600.2	Bm_scaf18 13 455 1410065 1410281 + 5330 1410045 1410301	+	6	0	FASTA:35-57	GGATACGATGTCGGCCCAAACGG	54
BM_gRNA_1806	BMgn000388|Gene012600.1	Bm_scaf18 13 160 1406684 1406978 + 5330 1406664 1406998	+	6	0	FASTA:216-238	AGGCAGTTGAGTCCTTACCCTGG	235
BM_gRNA_1807	BMgn000388|Gene012600.2	Bm_scaf18 13 455 1410065 1410281 + 5330 1410045 1410301	-	6	0	FASTA:145-167	CGTGGCTGTCGGCAACGTAGTGG	147
BM_gRNA_1808	BMgn000388|Gene012600.1	Bm_scaf18 13 160 1406684 1406978 + 5330 1406664 1406998	+	5	0	FASTA:119-141	AGTCGAAGTACCTTTGAAGAAGG	138
BM_gRNA_1809	BMgn000389|Gene012599.1	Bm_scaf18 3 131 1442185 1442332 + 1164 1442165 1442352	-	5	0	FASTA:47-69	CGGCGAAGGTACATCCGAAAAGG	49
BM_gRNA_1810	BMgn000389|Gene012599.2	Bm_scaf18 3 279 1442598 1443094 + 1164 1442578 1443114 Warning:CutE1443482	+	5	0	FASTA:35-57	TTTGATAGAAACTACCCTGACGG	54
BM_gRNA_1811	BMgn000389|Gene012599.1	Bm_scaf18 3 131 1442185 1442332 + 1164 1442165 1442352	+	4	0	FASTA:145-167	TTAAAACTGCAGCCAATGCGTGG	164
BM_gRNA_1812	BMgn000389|Gene012599.2	Bm_scaf18 3 279 1442598 1443094 + 1164 1442578 1443114 Warning:CutE1443482	+	5	0	FASTA:71-93	TACAGACACGGATTCGTAACTGG	90
BM_gRNA_1813	BMgn000389|Gene012599.2	Bm_scaf18 3 279 1442598 1443094 + 1164 1442578 1443114 Warning:CutE1443482	+	5	0	FASTA:149-171	AACGTCGGTAATGGAGGCTACGG	168
BM_gRNA_1814	BMgn000390|Gene012597.0	Bm_scaf18 23 0 1463553 1463830 + 4023 1463533 1463850	-	5	0	FASTA:140-162	AGCCTTCAGCCAGCTCTACATGG	142
BM_gRNA_1815	BMgn000390|Gene012597.1	Bm_scaf18 23 278 1465838 1466151 + 4023 1465818 1466171	-	4	0	FASTA:44-66	ACAAATCTGCACAGAGTTACTGG	46
BM_gRNA_1816	BMgn000390|Gene012597.2	Bm_scaf18 23 592 1467139 1467275 + 4023 1467119 1467295	+	5	0	FASTA:19-41	AGGTTTGGCATTTGATACATGGG	38
BM_gRNA_1817	BMgn000390|Gene012597.0	Bm_scaf18 23 0 1463553 1463830 + 4023 1463533 1463850	+	4	0	FASTA:181-203	ATCAGATCAAAGTGTTAAAATGG	200
BM_gRNA_1818	BMgn000390|Gene012597.1	Bm_scaf18 23 278 1465838 1466151 + 4023 1465818 1466171	+	4	0	FASTA:109-131	ACAAGATACCTAATTACATTTGG	128
BM_gRNA_1819	BMgn000391|Gene012593.0	Bm_scaf18 18 0 1492000 1492285 + 3183 1491980 1492305	-	5	0	FASTA:222-244	TCGGGAAGTCCACTCTATCTGGG	224
BM_gRNA_1820	BMgn000391|Gene012593.1	Bm_scaf18 18 286 1492676 1492754 + 3183 1492656 1492774	-	5	0	FASTA:37-59	CTTCTTTGGTACTGCATCATTGG	39
BM_gRNA_1821	BMgn000391|Gene012593.2	Bm_scaf18 18 365 1493170 1493305 + 3183 1493150 1493325	+	6	0	FASTA:74-96	TGGCGATCTTACATCGGAATGGG	93
BM_gRNA_1822	BMgn000391|Gene012593.0	Bm_scaf18 18 0 1492000 1492285 + 3183 1491980 1492305	-	5	0	FASTA:258-280	TAACTATATCCTGATCCCTTGGG	260
BM_gRNA_1823	BMgn000391|Gene012593.1	Bm_scaf18 18 286 1492676 1492754 + 3183 1492656 1492774	-	5	0	FASTA:68-90	CACTGATATTCATAAGACCTTGG	70
BM_gRNA_1824	BMgn000392|Gene012587.0	Bm_scaf18 1 0 1648778 1649711 + 1402 1648758 1649731 Warning:CutE1650179	+	5	0	FASTA:323-345	TTTAAAAGGCAAAGCAGGCTTGG	342
BM_gRNA_1825	BMgn000392|Gene012587.0	Bm_scaf18 1 0 1648778 1649711 + 1402 1648758 1649731 Warning:CutE1650179	-	4	0	FASTA:104-126	GCTGATGTTGAGACCACCACAGG	106
BM_gRNA_1826	BMgn000392|Gene012587.0	Bm_scaf18 1 0 1648778 1649711 + 1402 1648758 1649731 Warning:CutE1650179	-	4	0	FASTA:126-148	AGTGCTCGAAAATTAGACTAAGG	128
BM_gRNA_1827	BMgn000392|Gene012587.0	Bm_scaf18 1 0 1648778 1649711 + 1402 1648758 1649731 Warning:CutE1650179	+	4	0	FASTA:174-196	CATTTTCTACTAACAATGAAAGG	193
BM_gRNA_1828	BMgn000392|Gene012587.0	Bm_scaf18 1 0 1648778 1649711 + 1402 1648758 1649731 Warning:CutE1650179	+	4	0	FASTA:729-751	GACAACAATACTTACACATGTGG	748
BM_gRNA_1829	BMgn000393|Gene012581.0	Bm_scaf18 5 0 1717697 1718326 + 2985 1717677 1718346	+	7	0	FASTA:573-595	AACAAAAGAAGTGCAGGGATCGG	592
BM_gRNA_1830	BMgn000393|Gene012581.1	Bm_scaf18 5 630 1718723 1718944 + 2985 1718703 1718964	-	5	0	FASTA:114-136	CGAAAAGTCTCTTCAGAGAATGG	116
BM_gRNA_1831	BMgn000393|Gene012581.0	Bm_scaf18 5 0 1717697 1718326 + 2985 1717677 1718346	-	4	0	FASTA:486-508	ACATTATTATCATAGTGCCAAGG	488
BM_gRNA_1832	BMgn000393|Gene012581.1	Bm_scaf18 5 630 1718723 1718944 + 2985 1718703 1718964	-	5	0	FASTA:193-215	ATATTCATTCCAAGCCATTATGG	195
BM_gRNA_1833	BMgn000393|Gene012581.0	Bm_scaf18 5 0 1717697 1718326 + 2985 1717677 1718346	+	4	0	FASTA:456-478	ATGGTATGTCAGGGGCAAACGGG	475
BM_gRNA_1834	BMgn000394|Gene012579.1	Bm_scaf18 2 169 1738253 1739103 + 1530 1738233 1739123 Warning:CutE1739613	-	5	0	FASTA:487-509	TGACCATAGAAGGTTTGTGTTGG	489
BM_gRNA_1835	BMgn000394|Gene012579.1	Bm_scaf18 2 169 1738253 1739103 + 1530 1738233 1739123 Warning:CutE1739613	-	5	0	FASTA:523-545	GTGGTTTTCCCAGCTCCAGGAGG	525
BM_gRNA_1836	BMgn000394|Gene012579.1	Bm_scaf18 2 169 1738253 1739103 + 1530 1738233 1739123 Warning:CutE1739613	-	5	0	FASTA:606-628	TTGTATCATTTGCTGGATCCAGG	608
BM_gRNA_1837	BMgn000394|Gene012579.1	Bm_scaf18 2 169 1738253 1739103 + 1530 1738233 1739123 Warning:CutE1739613	+	5	0	FASTA:717-739	ATTATACTGCATGGAATACCTGG	736
BM_gRNA_1838	BMgn000394|Gene012579.1	Bm_scaf18 2 169 1738253 1739103 + 1530 1738233 1739123 Warning:CutE1739613	+	5	0	FASTA:756-778	GCTCTTAAATCAACTACATGGGG	775
BM_gRNA_1839	BMgn000395|Gene012576.2	Bm_scaf18 3 166 1768499 1768563 + 347 1768479 1768583 Warning:CutE1768679	+	5	0	FASTA:27-49	GGTCAGTGAAGGCTAAGCGCAGG	46
BM_gRNA_1840	BMgn000395|Gene012576.2	Bm_scaf18 3 166 1768499 1768563 + 347 1768479 1768583 Warning:CutE1768679	+	5	0	FASTA:44-66	CGCAGGAAGACTACTGGAACTGG	63
BM_gRNA_1841	BMgn000395|Gene012576.2	Bm_scaf18 3 166 1768499 1768563 + 347 1768479 1768583 Warning:CutE1768679	+	5	0	FASTA:38-60	GCTAAGCGCAGGAAGACTACTGG	57
BM_gRNA_1842	BMgn000395|Gene012576.1	Bm_scaf18 3 30 1767141 1767276 + 347 1767121 1767296	-	6	0	FASTA:122-144	TTGCTGCAGGATATCCACATTGG	124
BM_gRNA_1843	BMgn000395|Gene012576.1	Bm_scaf18 3 30 1767141 1767276 + 347 1767121 1767296	+	5	0	FASTA:6-28	CAATGTCAATTTCAGACGAAGGG	25
BM_gRNA_1844	BMgn000396|Gene012575.0	Bm_scaf18 4 0 1773911 1774490 + 2502 1773891 1774510	-	6	0	FASTA:403-425	TCTACTGGTGTGGGTGGTACCGG	405
BM_gRNA_1845	BMgn000396|Gene012575.0	Bm_scaf18 4 0 1773911 1774490 + 2502 1773891 1774510	+	6	0	FASTA:514-536	AGTCCATTGGGCCTCATCTCTGG	533
BM_gRNA_1846	BMgn000396|Gene012575.0	Bm_scaf18 4 0 1773911 1774490 + 2502 1773891 1774510	+	4	0	FASTA:427-449	GATACTGAATCACAGTCTAATGG	446
BM_gRNA_1847	BMgn000396|Gene012575.0	Bm_scaf18 4 0 1773911 1774490 + 2502 1773891 1774510	+	4	0	FASTA:465-487	CGGTACGCAGAAGTCACAACTGG	484
BM_gRNA_1848	BMgn000396|Gene012575.0	Bm_scaf18 4 0 1773911 1774490 + 2502 1773891 1774510	-	4	0	FASTA:492-514	TTCCGTGAGCTTGCTGACAGTGG	494
BM_gRNA_1849	BMgn000398|Gene012574.2	Bm_scaf18 11 265 1795241 1795439 + 2808 1795221 1795459	+	5	0	FASTA:108-130	GGCTCAAAGTTATTAGTTGGTGG	127
BM_gRNA_1850	BMgn000398|Gene012574.2	Bm_scaf18 11 265 1795241 1795439 + 2808 1795221 1795459	-	4	0	FASTA:73-95	TTGAACTACTTCTTGAGCACTGG	75
BM_gRNA_1851	BMgn000398|Gene012574.2	Bm_scaf18 11 265 1795241 1795439 + 2808 1795221 1795459	+	4	0	FASTA:182-204	AAAAGTATCAGCTCTGACAGTGG	201
BM_gRNA_1852	BMgn000398|Gene012574.2	Bm_scaf18 11 265 1795241 1795439 + 2808 1795221 1795459	+	4	0	FASTA:123-145	GTTGGTGGTTTTGGACTCTGTGG	142
BM_gRNA_1853	BMgn000398|Gene012574.2	Bm_scaf18 11 265 1795241 1795439 + 2808 1795221 1795459	+	5	1	FASTA:87-109	GTAGTTCAAGATGTATCAGATGG	106
BM_gRNA_1854	BMgn000399|Gene012573.6	Bm_scaf18 7 813 1809826 1809928 + 1374 1809806 1809948 Warning:CutE1810386	-	5	0	FASTA:63-85	TTCGTCGGGTCCACGACAGCGGG	65
BM_gRNA_1855	BMgn000399|Gene012573.6	Bm_scaf18 7 813 1809826 1809928 + 1374 1809806 1809948 Warning:CutE1810386	-	4	0	FASTA:117-139	TCGACGGCCAATATAATGAGCGG	119
BM_gRNA_1856	BMgn000399|Gene012573.6	Bm_scaf18 7 813 1809826 1809928 + 1374 1809806 1809948 Warning:CutE1810386	+	4	0	FASTA:82-104	CGAATTTTGGAGAAAGCGACGGG	101
BM_gRNA_1857	BMgn000399|Gene012573.6	Bm_scaf18 7 813 1809826 1809928 + 1374 1809806 1809948 Warning:CutE1810386	+	5	0	FASTA:53-75	ATAAACTGGGCCCGCTGTCGTGG	72
BM_gRNA_1858	BMgn000399|Gene012573.6	Bm_scaf18 7 813 1809826 1809928 + 1374 1809806 1809948 Warning:CutE1810386	-	5	0	FASTA:77-99	CGCTTTCTCCAAAATTCGTCGGG	79
BM_gRNA_1859	BMgn000400|Gene012565.1	Bm_scaf18 5 17 2053466 2053646 + 798 2053446 2053666	-	6	0	FASTA:30-52	AGCATGTACGCTCCAGAACACGG	32
BM_gRNA_1860	BMgn000400|Gene012565.2	Bm_scaf18 5 198 2055121 2055182 + 798 2055101 2055202	-	5	0	FASTA:30-52	ATTTCGAGTCTTATTTCTAGAGG	32
BM_gRNA_1861	BMgn000400|Gene012565.1	Bm_scaf18 5 17 2053466 2053646 + 798 2053446 2053666	+	5	0	FASTA:105-127	TGCTGCAGCGGCAGTGGTGACGG	124
BM_gRNA_1862	BMgn000400|Gene012565.2	Bm_scaf18 5 198 2055121 2055182 + 798 2055101 2055202	+	4	0	FASTA:61-83	GGGAAACTTTGCAAGCACTCAGG	80
BM_gRNA_1863	BMgn000400|Gene012565.1	Bm_scaf18 5 17 2053466 2053646 + 798 2053446 2053666	-	5	0	FASTA:148-170	GAAGGAGTAGTGCGAAGTACGGG	150
BM_gRNA_1864	BMgn000401|Gene012564.0	Bm_scaf18 6 0 2067069 2068247 + 2364 2067049 2068267	+	6	0	FASTA:320-342	ATTAGAAAGGGACACTGATCCGG	339
BM_gRNA_1865	BMgn000401|Gene012564.1	Bm_scaf18 6 1179 2068394 2068531 + 2364 2068374 2068551	+	6	0	FASTA:104-126	GATGCGTCGCTATGCCCTCCAGG	123
BM_gRNA_1866	BMgn000401|Gene012564.2	Bm_scaf18 6 1317 2070490 2070619 + 2364 2070470 2070639	+	5	0	FASTA:39-61	ATAGCTAAGTATTCGTCGAATGG	58
BM_gRNA_1867	BMgn000401|Gene012564.0	Bm_scaf18 6 0 2067069 2068247 + 2364 2067049 2068267	-	6	0	FASTA:802-824	TTGATTTGGAGCTGCCAATACGG	804
BM_gRNA_1868	BMgn000401|Gene012564.1	Bm_scaf18 6 1179 2068394 2068531 + 2364 2068374 2068551	+	5	0	FASTA:133-155	AAGAGGGTATTCAACGGCTTAGG	152
BM_gRNA_1869	BMgn000402|Gene012563.1	Bm_scaf18 5 269 2078780 2079201 + 1709 2078760 2079221	-	6	0	FASTA:71-93	GTCAATGCTAATTCTGCACCAGG	73
BM_gRNA_1870	BMgn000402|Gene012563.2	Bm_scaf18 5 691 2079808 2079906 + 1709 2079788 2079926	-	5	0	FASTA:21-43	TATTTGCCACATGTTGTGTAAGG	23
BM_gRNA_1871	BMgn000402|Gene012563.1	Bm_scaf18 5 269 2078780 2079201 + 1709 2078760 2079221	+	5	0	FASTA:38-60	ATTTGGGGTCTTGTAAGACATGG	57
BM_gRNA_1872	BMgn000402|Gene012563.2	Bm_scaf18 5 691 2079808 2079906 + 1709 2079788 2079926	-	5	0	FASTA:66-88	TTTGATTCGAGGTATATCTCAGG	68
BM_gRNA_1873	BMgn000402|Gene012563.1	Bm_scaf18 5 269 2078780 2079201 + 1709 2078760 2079221	+	5	0	FASTA:221-243	GCATATCAACTCTCTGAAGAAGG	240
BM_gRNA_1874	BMgn000403|Gene012559.1	Bm_scaf18 13 582 2152891 2153830 + 3494 2152871 2153850	-	7	0	FASTA:889-911	TGAGGGTGTCGGCTCAGAGTTGG	891
BM_gRNA_1875	BMgn000403|Gene012559.2	Bm_scaf18 13 1522 2154069 2154266 + 3494 2154049 2154286	-	6	0	FASTA:111-133	CTCCACTGATGGTTGCTGCATGG	113
BM_gRNA_1876	BMgn000403|Gene012559.1	Bm_scaf18 13 582 2152891 2153830 + 3494 2152871 2153850	+	6	0	FASTA:503-525	CTCTCTCAAAACGGCGCCCCCGG	522
BM_gRNA_1877	BMgn000403|Gene012559.2	Bm_scaf18 13 1522 2154069 2154266 + 3494 2154049 2154286	+	5	0	FASTA:44-66	GTTAGTTTCTTTCGGAGGCTTGG	63
BM_gRNA_1878	BMgn000403|Gene012559.1	Bm_scaf18 13 582 2152891 2153830 + 3494 2152871 2153850	-	6	0	FASTA:558-580	TTGCTCGAGCGGTCGAGCGACGG	560
BM_gRNA_1879	BMgn000406|Gene012558.0	Bm_scaf18 4 0 2265434 2265523 + 885 2265414 2265543	-	5	0	FASTA:39-61	AGGCTTTTGTCCGGTTCGTCTGG	41
BM_gRNA_1880	BMgn000406|Gene012558.1	Bm_scaf18 4 90 2267336 2267566 + 885 2267316 2267586	-	6	0	FASTA:121-143	AGGGTCGGAGGTGTCGATGACGG	123
BM_gRNA_1881	BMgn000406|Gene012558.0	Bm_scaf18 4 0 2265434 2265523 + 885 2265414 2265543	-	5	0	FASTA:81-103	TGTTTAACTGGCGAAGGGCACGG	83
BM_gRNA_1882	BMgn000406|Gene012558.1	Bm_scaf18 4 90 2267336 2267566 + 885 2267316 2267586	-	5	0	FASTA:39-61	AGAATCACATACAGATTCGTTGG	41
BM_gRNA_1883	BMgn000406|Gene012558.1	Bm_scaf18 4 90 2267336 2267566 + 885 2267316 2267586	-	5	0	FASTA:214-236	GACTTGTAGAGGTCTTTCACCGG	216
BM_gRNA_1884	BMgn000407|Gene012557.2	Bm_scaf18 6 468 2311036 2311177 + 2136 2311016 2311197	-	6	0	FASTA:39-61	ATCACCTTCCGACTCGCCACTGG	41
BM_gRNA_1885	BMgn000407|Gene012557.2	Bm_scaf18 6 468 2311036 2311177 + 2136 2311016 2311197	-	5	0	FASTA:74-96	GATTGGCTGCGTGGAGTCTCCGG	76
BM_gRNA_1886	BMgn000407|Gene012557.2	Bm_scaf18 6 468 2311036 2311177 + 2136 2311016 2311197	+	5	0	FASTA:102-124	AGGCTACTGGAAAATGGAGGAGG	121
BM_gRNA_1887	BMgn000407|Gene012557.2	Bm_scaf18 6 468 2311036 2311177 + 2136 2311016 2311197	+	4	0	FASTA:55-77	AGGTGATCGCACCTTGTCCCCGG	74
BM_gRNA_1888	BMgn000407|Gene012557.2	Bm_scaf18 6 468 2311036 2311177 + 2136 2311016 2311197	-	4	0	FASTA:26-48	TCGCCACTGGAAGCCGTCGAGGG	28
BM_gRNA_1889	BMgn000408|Gene012556.0	Bm_scaf18 1 0 2365412 2366794 + 2075 2365392 2366814 Warning:CutE2367486	+	6	0	FASTA:487-509	GTCCATCACTGTCACCATAATGG	506
BM_gRNA_1890	BMgn000408|Gene012556.0	Bm_scaf18 1 0 2365412 2366794 + 2075 2365392 2366814 Warning:CutE2367486	-	6	0	FASTA:649-671	ACTTCAGGCGATAAGTAACCGGG	651
BM_gRNA_1891	BMgn000408|Gene012556.0	Bm_scaf18 1 0 2365412 2366794 + 2075 2365392 2366814 Warning:CutE2367486	-	6	0	FASTA:925-947	CGTTCCCGGTGGCAAATCCATGG	927
BM_gRNA_1892	BMgn000408|Gene012556.0	Bm_scaf18 1 0 2365412 2366794 + 2075 2365392 2366814 Warning:CutE2367486	-	6	0	FASTA:1215-1237	CAAACGAGTCCGCTTTTGTCAGG	1217
BM_gRNA_1893	BMgn000408|Gene012556.0	Bm_scaf18 1 0 2365412 2366794 + 2075 2365392 2366814 Warning:CutE2367486	-	5	0	FASTA:188-210	AGCTCTCCTAACAATCGAGAAGG	190
BM_gRNA_1894	BMgn000409|Gene012553.2	Bm_scaf18 8 313 2381457 2381593 + 2388 2381437 2381613	+	4	0	FASTA:36-58	GATGGTAATGCCTAGTCCAATGG	55
BM_gRNA_1895	BMgn000409|Gene012553.2	Bm_scaf18 8 313 2381457 2381593 + 2388 2381437 2381613	-	4	0	FASTA:95-117	TATTTGTACACTGGCTTCACAGG	97
BM_gRNA_1896	BMgn000409|Gene012553.2	Bm_scaf18 8 313 2381457 2381593 + 2388 2381437 2381613	+	4	0	FASTA:136-158	AAATTAATCATTACTAAAGATGG	155
BM_gRNA_1897	BMgn000409|Gene012553.2	Bm_scaf18 8 313 2381457 2381593 + 2388 2381437 2381613	-	4	0	FASTA:104-126	AAGGCTAGTTATTTGTACACTGG	106
BM_gRNA_1898	BMgn000409|Gene012553.7	Bm_scaf18 8 1251 2390689 2391029 + 2388 2390669 2391049 Warning:CutE2391825	-	5	0	FASTA:44-66	GACCACGTGGCCTGCGCGTCCGG	46
BM_gRNA_1899	BMgn000411|Gene012552.5	Bm_scaf18 10 954 2402508 2402651 + 1885 2402488 2402671	+	5	0	FASTA:24-46	TCGGAATATCAGAACCGATAGGG	43
BM_gRNA_1900	BMgn000411|Gene012552.5	Bm_scaf18 10 954 2402508 2402651 + 1885 2402488 2402671	+	4	0	FASTA:25-47	CGGAATATCAGAACCGATAGGGG	44
BM_gRNA_1901	BMgn000411|Gene012552.0	Bm_scaf18 10 0 2395289 2395567 + 1885 2395269 2395587	+	5	0	FASTA:85-107	GGATCAAATTACGCTGTTGCCGG	104
BM_gRNA_1902	BMgn000411|Gene012552.1	Bm_scaf18 10 279 2395783 2395975 + 1885 2395763 2395995	+	6	0	FASTA:64-86	TTCTAAAGCCTACCCGTGGACGG	83
BM_gRNA_1903	BMgn000411|Gene012552.0	Bm_scaf18 10 0 2395289 2395567 + 1885 2395269 2395587	-	5	0	FASTA:109-131	ACAACGTGTGTACGTTTCGCGGG	111
BM_gRNA_1904	BMgn000412|Gene012551.0	Bm_scaf18 1 0 2407033 2407797 + 1148 2407013 2407817 Warning:CutE2408180	-	6	0	FASTA:371-393	TCGCTCTCGGACCTATCCTCGGG	373
BM_gRNA_1905	BMgn000412|Gene012551.0	Bm_scaf18 1 0 2407033 2407797 + 1148 2407013 2407817 Warning:CutE2408180	-	5	0	FASTA:344-366	TCTGACTCAGGTACTGCAGACGG	346
BM_gRNA_1906	BMgn000412|Gene012551.0	Bm_scaf18 1 0 2407033 2407797 + 1148 2407013 2407817 Warning:CutE2408180	+	5	0	FASTA:412-434	TATTGGAGACATACTAAGAAGGG	431
BM_gRNA_1907	BMgn000412|Gene012551.0	Bm_scaf18 1 0 2407033 2407797 + 1148 2407013 2407817 Warning:CutE2408180	+	5	0	FASTA:453-475	AAAATTCGCAGAAATCTTTACGG	472
BM_gRNA_1908	BMgn000412|Gene012551.0	Bm_scaf18 1 0 2407033 2407797 + 1148 2407013 2407817 Warning:CutE2408180	-	5	0	FASTA:545-567	ATGGCGGTGGTCAGTTCCTCTGG	547
BM_gRNA_1909	BMgn000413|Gene012548.0	Bm_scaf18 3 0 2605419 2605795 + 651 2605399 2605815	-	5	0	FASTA:76-98	TGGCTTGACGTGCTTGGTTGAGG	78
BM_gRNA_1910	BMgn000413|Gene012548.1	Bm_scaf18 3 377 2606094 2606150 + 651 2606074 2606170 Warning:CutE2606191	+	4	0	FASTA:57-79	ATTAAAGAGTATCGAAAGGAAGG	76
BM_gRNA_1911	BMgn000413|Gene012548.0	Bm_scaf18 3 0 2605419 2605795 + 651 2605399 2605815	+	4	0	FASTA:51-73	ATTGTTCCGTACAAACGATATGG	70
BM_gRNA_1912	BMgn000413|Gene012548.0	Bm_scaf18 3 0 2605419 2605795 + 651 2605399 2605815	-	4	0	FASTA:108-130	ATCCGCGTTCTCTTCTTTCTTGG	110
BM_gRNA_1913	BMgn000413|Gene012548.0	Bm_scaf18 3 0 2605419 2605795 + 651 2605399 2605815	+	4	0	FASTA:243-265	TCGAAAACAGCTGACATTTCGGG	262
BM_gRNA_1914	BMgn000414|Gene012547.2	Bm_scaf18 6 524 2617214 2617515 + 2045 2617194 2617535	+	5	0	FASTA:191-213	GTAAACAAAGAATTAAGCTCTGG	210
BM_gRNA_1915	BMgn000414|Gene012547.2	Bm_scaf18 6 524 2617214 2617515 + 2045 2617194 2617535	-	5	0	FASTA:254-276	CTATCTACATCATGGTCTGCTGG	256
BM_gRNA_1916	BMgn000414|Gene012547.2	Bm_scaf18 6 524 2617214 2617515 + 2045 2617194 2617535	-	4	0	FASTA:52-74	CTATAGCCGATGTTATAATTCGG	54
BM_gRNA_1917	BMgn000414|Gene012547.2	Bm_scaf18 6 524 2617214 2617515 + 2045 2617194 2617535	-	4	0	FASTA:120-142	AGCTTTTATAAGGTCATCAAAGG	122
BM_gRNA_1918	BMgn000414|Gene012547.2	Bm_scaf18 6 524 2617214 2617515 + 2045 2617194 2617535	-	4	0	FASTA:230-252	CCCAAAGCTAAATTACCATTTGG	232
BM_gRNA_1919	BMgn000415|Gene012546.0	Bm_scaf18 1 0 2638414 2640187 + 2662 2638394 2640207 Warning:CutE2641075	-	5	0	FASTA:1442-1464	CGATATACTAAAGATTGCTACGG	1444
BM_gRNA_1920	BMgn000415|Gene012546.0	Bm_scaf18 1 0 2638414 2640187 + 2662 2638394 2640207 Warning:CutE2641075	+	5	0	FASTA:1505-1527	TTGGTATCCACTCTTTCTTGTGG	1524
BM_gRNA_1921	BMgn000415|Gene012546.0	Bm_scaf18 1 0 2638414 2640187 + 2662 2638394 2640207 Warning:CutE2641075	-	4	0	FASTA:1270-1292	TTGCTCCATAAAGGTGACAAAGG	1272
BM_gRNA_1922	BMgn000415|Gene012546.0	Bm_scaf18 1 0 2638414 2640187 + 2662 2638394 2640207 Warning:CutE2641075	+	4	0	FASTA:1712-1734	AATGTTTAGTTATGAGTGATAGG	1731
BM_gRNA_1923	BMgn000415|Gene012546.0	Bm_scaf18 1 0 2638414 2640187 + 2662 2638394 2640207 Warning:CutE2641075	-	4	1	FASTA:1605-1627	GTGAACAACTTAGAAAAGAAAGG	1607
BM_gRNA_1924	BMgn000416|Gene012544.0	Bm_scaf18 3 0 2685667 2685926 + 3474 2685647 2685946	+	6	0	FASTA:75-97	GTGGACGCTCTAAGTGGTGGCGG	94
BM_gRNA_1925	BMgn000416|Gene012544.1	Bm_scaf18 3 260 2690468 2690577 + 3474 2690448 2690597	-	4	0	FASTA:33-55	CCAATTCGCTCTTTTGATTTAGG	35
BM_gRNA_1926	BMgn000416|Gene012544.2	Bm_scaf18 3 370 2695596 2697541 + 3474 2695576 2697561 Warning:CutE2698699	-	6	0	FASTA:33-55	TCGCCGAGCTCGCTCTGTCAGGG	35
BM_gRNA_1927	BMgn000416|Gene012544.0	Bm_scaf18 3 0 2685667 2685926 + 3474 2685647 2685946	+	6	0	FASTA:134-156	AAACCTGGGCGCCGTGGATATGG	153
BM_gRNA_1928	BMgn000416|Gene012544.1	Bm_scaf18 3 260 2690468 2690577 + 3474 2690448 2690597	+	4	0	FASTA:99-121	AATGCGGGAACAGCAACACAAGG	118
BM_gRNA_1929	BMgn000417|Gene012543.0	Bm_scaf18 4 0 2699234 2700815 + 2373 2699214 2700835 Warning:CutE2701132	-	6	0	FASTA:279-301	TCGAGAGCAGTTGGGAAAGCGGG	281
BM_gRNA_1930	BMgn000417|Gene012543.0	Bm_scaf18 4 0 2699234 2700815 + 2373 2699214 2700835 Warning:CutE2701132	+	5	0	FASTA:177-199	AATGATGTCGGATCGTACGACGG	196
BM_gRNA_1931	BMgn000417|Gene012543.0	Bm_scaf18 4 0 2699234 2700815 + 2373 2699214 2700835 Warning:CutE2701132	+	5	0	FASTA:207-229	CCGACCTCCGCAGATTACACTGG	226
BM_gRNA_1932	BMgn000417|Gene012543.0	Bm_scaf18 4 0 2699234 2700815 + 2373 2699214 2700835 Warning:CutE2701132	+	5	0	FASTA:814-836	GTATCTCGACAACCACACCCAGG	833
BM_gRNA_1933	BMgn000417|Gene012543.0	Bm_scaf18 4 0 2699234 2700815 + 2373 2699214 2700835 Warning:CutE2701132	-	5	0	FASTA:861-883	GCATTCCCAGAATGAGAATGTGG	863
BM_gRNA_1934	BMgn000418|Gene012542.1	Bm_scaf18 8 76 2725634 2725931 + 1920 2725614 2725951	-	6	0	FASTA:129-151	ATGGCATTCTCACGTTCAGCCGG	131
BM_gRNA_1935	BMgn000418|Gene012542.2	Bm_scaf18 8 374 2728186 2728421 + 1920 2728166 2728441	+	5	0	FASTA:214-236	TAAGCTAGAGGACATGAAAGAGG	233
BM_gRNA_1936	BMgn000418|Gene012542.1	Bm_scaf18 8 76 2725634 2725931 + 1920 2725614 2725951	+	5	0	FASTA:100-122	GGAAAGAAGTAGATTACGAATGG	119
BM_gRNA_1937	BMgn000418|Gene012542.1	Bm_scaf18 8 76 2725634 2725931 + 1920 2725614 2725951	+	4	0	FASTA:79-101	CTCCACAGCTACGATTTGCTTGG	98
BM_gRNA_1938	BMgn000418|Gene012542.2	Bm_scaf18 8 374 2728186 2728421 + 1920 2728166 2728441	+	4	0	FASTA:202-224	TAGATACTTCTTTAAGCTAGAGG	221
BM_gRNA_1939	BMgn000419|Gene012541.0	Bm_scaf18 6 0 2737846 2737935 + 1085 2737826 2737955	+	4	0	FASTA:76-98	AAATTCAAGTCGGAAAAGATCGG	95
BM_gRNA_1940	BMgn000419|Gene012541.1	Bm_scaf18 6 90 2739845 2740032 + 1085 2739825 2740052	+	6	0	FASTA:51-73	GTTTGCCTCAGTTGGTTATCAGG	70
BM_gRNA_1941	BMgn000419|Gene012541.2	Bm_scaf18 6 278 2743117 2743307 + 1085 2743097 2743327	+	5	0	FASTA:46-68	TAAAGGAGCTATATTTGTTCAGG	65
BM_gRNA_1942	BMgn000419|Gene012541.1	Bm_scaf18 6 90 2739845 2740032 + 1085 2739825 2740052	+	5	0	FASTA:20-42	GTGGTTTAATCGGGAGATCATGG	39
BM_gRNA_1943	BMgn000419|Gene012541.2	Bm_scaf18 6 278 2743117 2743307 + 1085 2743097 2743327	-	4	0	FASTA:109-131	CAACTACGCTGTCGAGATTCTGG	111
BM_gRNA_1944	BMgn000420|Gene012540.0	Bm_scaf18 6 0 2747991 2748779 + 1952 2747971 2748799	+	6	0	FASTA:398-420	ACTCCATTCCGTGACATGGCTGG	417
BM_gRNA_1945	BMgn000420|Gene012540.1	Bm_scaf18 6 789 2749760 2749945 + 1952 2749740 2749965	+	5	0	FASTA:21-43	GACATGCTGGAGTCAAGTCCCGG	40
BM_gRNA_1946	BMgn000420|Gene012540.2	Bm_scaf18 6 975 2751671 2751807 + 1952 2751651 2751827	+	5	0	FASTA:45-67	GATATATGTTACACAGGACAGGG	64
BM_gRNA_1947	BMgn000420|Gene012540.0	Bm_scaf18 6 0 2747991 2748779 + 1952 2747971 2748799	+	5	0	FASTA:362-384	GAGCGACGATAACTTTATGCTGG	381
BM_gRNA_1948	BMgn000420|Gene012540.1	Bm_scaf18 6 789 2749760 2749945 + 1952 2749740 2749965	+	5	0	FASTA:71-93	TGATTACTTTCTACAGCTGCTGG	90
BM_gRNA_1949	BMgn000421|Gene012538.0	Bm_scaf18 2 0 2808811 2809036 + 2516 2808791 2809056	-	7	0	FASTA:101-123	CGGCGACTCTCACGCATACGTGG	103
BM_gRNA_1950	BMgn000421|Gene012538.1	Bm_scaf18 2 226 2809757 2811207 + 2516 2809737 2811227 Warning:CutE2812046	-	6	0	FASTA:212-234	GCAGGCGCTACGGGTGATACTGG	214
BM_gRNA_1951	BMgn000421|Gene012538.0	Bm_scaf18 2 0 2808811 2809036 + 2516 2808791 2809056	-	6	0	FASTA:50-72	CATAGTACGCCCCCAGGATGCGG	52
BM_gRNA_1952	BMgn000421|Gene012538.1	Bm_scaf18 2 226 2809757 2811207 + 2516 2809737 2811227 Warning:CutE2812046	+	6	0	FASTA:415-437	CCCAGTTTCTAGTTCTGCGCCGG	434
BM_gRNA_1953	BMgn000421|Gene012538.0	Bm_scaf18 2 0 2808811 2809036 + 2516 2808791 2809056	-	6	0	FASTA:156-178	TGGTGGAACAGCGTACCGGGGGG	158
BM_gRNA_1954	BMgn000422|Gene012536.3	Bm_scaf18 10 447 2899048 2899238 + 3674 2899028 2899258	+	6	0	FASTA:82-104	GTGCTACGCATACTGCGCGAAGG	101
BM_gRNA_1955	BMgn000422|Gene012536.3	Bm_scaf18 10 447 2899048 2899238 + 3674 2899028 2899258	-	5	0	FASTA:56-78	CACGCGGCTAGGGTTGGCCACGG	58
BM_gRNA_1956	BMgn000422|Gene012536.3	Bm_scaf18 10 447 2899048 2899238 + 3674 2899028 2899258	-	5	0	FASTA:113-135	TTTCGATTGGCCATAAGTTTGGG	115
BM_gRNA_1957	BMgn000422|Gene012536.3	Bm_scaf18 10 447 2899048 2899238 + 3674 2899028 2899258	+	4	0	FASTA:154-176	TATTCTCGTCGTTTACAACATGG	173
BM_gRNA_1958	BMgn000422|Gene012536.3	Bm_scaf18 10 447 2899048 2899238 + 3674 2899028 2899258	+	4	0	FASTA:177-199	CTCAGACTATCTTCAGCGCCTGG	196
BM_gRNA_1959	BMgn000423|Gene012535.0	Bm_scaf18 1 0 2937306 2937437 + 198 2937286 2937457 Warning:CutE2937503	+	5	0	FASTA:42-64	GAGGAAGAAATGGGAGTTAATGG	61
BM_gRNA_1960	BMgn000423|Gene012535.0	Bm_scaf18 1 0 2937306 2937437 + 198 2937286 2937457 Warning:CutE2937503	+	4	1	FASTA:33-55	AAGGTGCTAGAGGAAGAAATGGG	52
BM_gRNA_1961	BMgn000423|Gene012535.0	Bm_scaf18 1 0 2937306 2937437 + 198 2937286 2937457 Warning:CutE2937503	+	4	0	FASTA:14-36	GAAGTCGATGAAATTCGAGAAGG	33
BM_gRNA_1962	BMgn000424|Gene012533.7	Bm_scaf18 10 648 2991390 2991632 + 2985 2991370 2991652	-	7	0	FASTA:77-99	CGGACATGGGCATCACTCCGTGG	79
BM_gRNA_1963	BMgn000424|Gene012533.7	Bm_scaf18 10 648 2991390 2991632 + 2985 2991370 2991652	-	6	0	FASTA:123-145	AAGAACGTAGAGTGTCCGCCTGG	125
BM_gRNA_1964	BMgn000424|Gene012533.7	Bm_scaf18 10 648 2991390 2991632 + 2985 2991370 2991652	-	5	0	FASTA:210-232	CATAGATATTTCCTCATGTGAGG	212
BM_gRNA_1965	BMgn000424|Gene012533.7	Bm_scaf18 10 648 2991390 2991632 + 2985 2991370 2991652	-	4	0	FASTA:152-174	CGATGTGTACAAACGTATTGAGG	154
BM_gRNA_1966	BMgn000424|Gene012533.7	Bm_scaf18 10 648 2991390 2991632 + 2985 2991370 2991652	+	4	0	FASTA:186-208	TACTACATGCTAGCAGCTATGGG	205
BM_gRNA_1967	BMgn000425|Gene012525.1	Bm_scaf18 7 222 3040466 3040638 + 3849 3040446 3040658	-	5	0	FASTA:130-152	ACCAATCTATTTCATAACTGTGG	132
BM_gRNA_1968	BMgn000425|Gene012525.2	Bm_scaf18 7 395 3044622 3044783 + 3849 3044602 3044803	-	6	0	FASTA:60-82	TTCCACATCCAGCCAATCGGGGG	62
BM_gRNA_1969	BMgn000425|Gene012525.1	Bm_scaf18 7 222 3040466 3040638 + 3849 3040446 3040658	+	5	0	FASTA:155-177	ATGGGATGGCAATTCTGTGATGG	174
BM_gRNA_1970	BMgn000425|Gene012525.2	Bm_scaf18 7 395 3044622 3044783 + 3849 3044602 3044803	+	5	0	FASTA:149-171	ATCTGAACTTTGCGACTATCCGG	168
BM_gRNA_1971	BMgn000425|Gene012525.1	Bm_scaf18 7 222 3040466 3040638 + 3849 3040446 3040658	+	4	0	FASTA:170-192	TGTGATGGAATCGGCGTTCTAGG	189
BM_gRNA_1972	BMgn000426|Gene012520.0	Bm_scaf18 4 0 3115040 3115081 + 606 3115020 3115101	+	4	0	FASTA:41-63	AATCAAAGAGATGTACAACATGG	60
BM_gRNA_1973	BMgn000426|Gene012520.1	Bm_scaf18 4 42 3115517 3115677 + 606 3115497 3115697	+	5	0	FASTA:61-83	CTGGGGACAGGAAGACACATTGG	80
BM_gRNA_1974	BMgn000426|Gene012520.2	Bm_scaf18 4 203 3116513 3116661 + 606 3116493 3116681	-	5	0	FASTA:29-51	CGGTACATTTCTCCTCACTACGG	31
BM_gRNA_1975	BMgn000426|Gene012520.1	Bm_scaf18 4 42 3115517 3115677 + 606 3115497 3115697	+	5	0	FASTA:90-112	AGACACGGCGATGTAGTGCGTGG	109
BM_gRNA_1976	BMgn000426|Gene012520.2	Bm_scaf18 4 203 3116513 3116661 + 606 3116493 3116681	-	5	0	FASTA:74-96	AAAACTGTGTAAAGACGGCTTGG	76
BM_gRNA_1977	BMgn000427|Gene012519.0	Bm_scaf18 1 0 3118998 3119213 + 324 3118978 3119233 Warning:CutE3119321	+	5	0	FASTA:29-51	GATGTGTTACATGGTGATCATGG	48
BM_gRNA_1978	BMgn000427|Gene012519.0	Bm_scaf18 1 0 3118998 3119213 + 324 3118978 3119233 Warning:CutE3119321	-	5	0	FASTA:64-86	GATGGACATCACGACCACCATGG	66
BM_gRNA_1979	BMgn000427|Gene012519.0	Bm_scaf18 1 0 3118998 3119213 + 324 3118978 3119233 Warning:CutE3119321	-	5	0	FASTA:100-122	CATGAACACCAAGCATATCACGG	102
BM_gRNA_1980	BMgn000427|Gene012519.0	Bm_scaf18 1 0 3118998 3119213 + 324 3118978 3119233 Warning:CutE3119321	+	5	0	FASTA:158-180	AATGCCTGTGGTGATCATGGTGG	177
BM_gRNA_1981	BMgn000427|Gene012519.0	Bm_scaf18 1 0 3118998 3119213 + 324 3118978 3119233 Warning:CutE3119321	+	4	0	FASTA:131-153	GGTGATCATGGTGATCATTATGG	150
BM_gRNA_1982	BMgn000428|Gene012493.1	Bm_scaf18 3 42 3271687 3272097 + 795 3271667 3272117	-	5	0	FASTA:175-197	TGCCACACGAGCAGCGTGGACGG	177
BM_gRNA_1983	BMgn000428|Gene012493.1	Bm_scaf18 3 42 3271687 3272097 + 795 3271667 3272117	+	4	0	FASTA:47-69	AGTGAGTGCTGCAGGCCTCCTGG	66
BM_gRNA_1984	BMgn000428|Gene012493.1	Bm_scaf18 3 42 3271687 3272097 + 795 3271667 3272117	-	4	1	FASTA:62-84	AGTAGTGCGGCTCGGCCAGGAGG	64
BM_gRNA_1985	BMgn000428|Gene012493.1	Bm_scaf18 3 42 3271687 3272097 + 795 3271667 3272117	-	4	0	FASTA:179-201	GGTATGCCACACGAGCAGCGTGG	181
BM_gRNA_1986	BMgn000428|Gene012493.1	Bm_scaf18 3 42 3271687 3272097 + 795 3271667 3272117	+	4	1	FASTA:173-195	AGCCGTCCACGCTGCTCGTGTGG	192
BM_gRNA_1987	BMgn000429|Gene012494.0	Bm_scaf18 2 0 3280336 3280749 + 757 3280316 3280769	+	5	0	FASTA:32-54	CGTAGCCCTGAGTGCTGTGCTGG	51
BM_gRNA_1988	BMgn000429|Gene012494.0	Bm_scaf18 2 0 3280336 3280749 + 757 3280316 3280769	+	5	0	FASTA:132-154	CACGACCAACCACAGCTCCATGG	151
BM_gRNA_1989	BMgn000429|Gene012494.0	Bm_scaf18 2 0 3280336 3280749 + 757 3280316 3280769	-	2	0	FASTA:84-106	GCAGCAGCCGAAGAATAGTGCGG	86
BM_gRNA_1990	BMgn000429|Gene012494.0	Bm_scaf18 2 0 3280336 3280749 + 757 3280316 3280769	-	2	0	FASTA:198-220	GGAGCTGCGTGGTATGCCACAGG	200
BM_gRNA_1991	BMgn000429|Gene012494.0	Bm_scaf18 2 0 3280336 3280749 + 757 3280316 3280769	-	2	0	FASTA:352-374	GACAGGAGCGGTGTAGTGGACGG	354
BM_gRNA_1992	BMgn000431|Gene012488.0	Bm_scaf18 2 0 3320510 3320650 + 312 3320490 3320670	+	4	0	FASTA:21-43	TTACAGGTATTGATTCTAGTAGG	40
BM_gRNA_1993	BMgn000431|Gene012488.0	Bm_scaf18 2 0 3320510 3320650 + 312 3320490 3320670	-	3	0	FASTA:64-86	CTGCGATGAGAACGCATGCTCGG	66
BM_gRNA_1994	BMgn000431|Gene012488.0	Bm_scaf18 2 0 3320510 3320650 + 312 3320490 3320670	-	2	0	FASTA:146-168	TATTTACATAATAGTCATGGTGG	148
BM_gRNA_1995	BMgn000431|Gene012488.0	Bm_scaf18 2 0 3320510 3320650 + 312 3320490 3320670	+	2	0	FASTA:5-27	TTTATATCCTTTTATTTTACAGG	24
BM_gRNA_1996	BMgn000431|Gene012488.0	Bm_scaf18 2 0 3320510 3320650 + 312 3320490 3320670	+	4	0	FASTA:30-52	TTGATTCTAGTAGGACTTGTGGG	49
BM_gRNA_1997	BMgn000432|Gene012486.1	Bm_scaf18 2 137 3326715 3326782 + 308 3326695 3326802 Warning:CutE3326885	+	2	1	FASTA:35-57	TGAGTTTGAGTACAAAGTTGAGG	54
BM_gRNA_1998	BMgn000432|Gene012486.0	Bm_scaf18 2 0 3326280 3326416 + 308 3326260 3326436	+	4	0	FASTA:25-47	TTTGATTCTGGTAGGATTTGTGG	44
[truncated: 92,002 more rows]
