# Supplementary material for: Genome-wide CRISPR screening reveals genes essential for cell viability and resistance to abiotic and biotic stresses in Bombyx mori
Source: HighWire-hosted journal article supplement (doi:10.1101/gr.249045.119), 2020-05-01
Supplement: Supplemental_Table_S3.xlsx.xlsx [file Supplemental_Table_S3.xlsx.xlsx]

## Sheet: Supplemental Table legend
Supplemental_Table_S3. The correlation analysis of two biological replicates for essential screen under normal conditions
Sheet1	Supplemental Table legend
Sheet2	log10(fold-changes) of sgRNAs
Sheet3	log10(negative scores) of genes

## Sheet: log10(fold-changes) of sgRNAs
sgRNA_id	Rep1	Rep2
gRNA_6	0.0369568	-0.464029
gRNA_8	0.121611	-0.159306
gRNA_10	0.112734	0.341561
gRNA_12	0.193245	0.273373
gRNA_13	-0.525442	-1.04836
gRNA_14	0.318075	0.0234197
gRNA_20	-0.0242897	-0.28713
gRNA_22	0.0108871	-0.601299
gRNA_23	-0.237226	-0.71869
gRNA_24	-0.0959414	-0.448995
gRNA_26	0.463517	0.344093
gRNA_28	-0.0789803	-0.264516
gRNA_29	-0.140389	-0.00681077
gRNA_30	0.371205	0.563127
gRNA_31	0.0546938	-0.977005
gRNA_36	0.241069	0.304066
gRNA_37	-0.0685431	-0.68515
gRNA_39	0.361914	0.5191
gRNA_43	0.0372457	-0.208193
gRNA_46	0.194043	-0.330138
gRNA_49	0.0465725	-0.0643304
gRNA_50	-0.339452	-0.672486
gRNA_51	0.404436	0.0695932
gRNA_54	0.369585	-0.0149302
gRNA_56	0.113891	-0.0518529
gRNA_58	0.215983	-0.024931
gRNA_59	0.00247531	-0.375223
gRNA_63	-0.0254597	-0.409753
gRNA_65	0.357687	-0.350717
gRNA_66	-0.583097	-0.749327
gRNA_67	0.0584076	0.0819745
gRNA_70	-0.0540509	-0.545495
gRNA_72	0.200314	-0.0168044
gRNA_76	0.665495	0.404417
gRNA_82	0.24611	0.0164635
gRNA_85	0.566921	0.534532
gRNA_86	-0.414057	-0.866507
gRNA_88	-0.102605	-0.56134
gRNA_90	0.263042	-0.0429923
gRNA_91	-0.5665	-0.882688
gRNA_94	-0.648927	-1.12808
gRNA_95	0.166042	-0.0143726
gRNA_96	0.299038	-0.0464029
gRNA_98	-0.113371	-0.819616
gRNA_99	-0.536481	-1.27976
gRNA_100	0.326949	0.255393
gRNA_101	0.157049	0.296086
gRNA_104	-0.137886	-0.392211
gRNA_109	0.103414	-0.244205
gRNA_110	0.269077	0.0423054
gRNA_113	0.706892	0.0342917
gRNA_114	-0.110922	-0.730931
gRNA_115	0.0278274	-0.292371
gRNA_116	0.467063	0.305982
gRNA_117	-0.309166	-0.656244
gRNA_118	0.0405769	-0.464413
gRNA_119	0.115881	-0.0484109
gRNA_120	-0.0213519	-0.183587
gRNA_123	-0.97255	-0.948281
gRNA_124	0.059321	0.258889
gRNA_125	-0.0849432	-0.69697
gRNA_126	0.267698	0.107076
gRNA_130	0.384213	0.205892
gRNA_133	-0.343398	-0.944552
gRNA_134	-0.0877928	-0.36077
gRNA_137	0.226584	0.621901
gRNA_139	0.31028	0.031469
gRNA_140	0.0455828	-0.445601
gRNA_141	0.570069	0.534403
gRNA_143	-0.0613557	-0.279238
gRNA_144	-0.317372	-0.801175
gRNA_151	-0.198097	-0.681964
gRNA_152	0.212096	-0.00499003
gRNA_154	-0.682515	-0.65825
gRNA_155	0.403899	1.02193
gRNA_157	0.326874	0.430645
gRNA_158	-0.143981	-0.859274
gRNA_159	0.284945	-0.0384098
gRNA_161	0.120543	-0.492054
gRNA_162	0.590889	0.358313
gRNA_163	-0.0465761	-0.480363
gRNA_165	-0.484044	-0.834338
gRNA_167	0.406074	0.450721
gRNA_168	-0.0827682	-0.541162
gRNA_169	0.250749	0.0492519
gRNA_171	-0.00158616	-0.650778
gRNA_172	0.711022	0.0580917
gRNA_174	-0.11804	-0.524665
gRNA_175	0.0495127	-0.19257
gRNA_178	0.0811224	-0.200546
gRNA_183	-0.0116413	-0.346629
gRNA_184	-0.0769983	-0.416856
gRNA_185	-0.0906667	-0.14471
gRNA_188	-0.594558	-0.570286
gRNA_191	0.18634	0.0371625
gRNA_194	0.405149	0.212608
gRNA_197	-0.33975	-0.797878
gRNA_199	-0.720776	-0.983897
gRNA_204	-0.52954	-1.22913
gRNA_205	0.157933	0.412869
gRNA_206	0.259576	-0.291386
gRNA_208	-0.159497	-0.51778
gRNA_213	0.357279	0.146196
gRNA_214	0.0161952	-0.100491
gRNA_215	-0.144085	-0.426034
gRNA_219	-0.260692	-0.84569
gRNA_221	0.381899	0.539341
gRNA_223	-0.326147	-1.26384
gRNA_225	-0.313372	-0.708761
gRNA_226	0.153657	-0.149085
gRNA_227	0.192413	0.260641
gRNA_228	0.224715	0.168158
gRNA_230	0.17377	0.161663
gRNA_236	-0.812853	-0.788578
gRNA_239	-0.102019	-0.310479
gRNA_241	0.332708	-0.0560317
gRNA_242	-0.381464	-1.02636
gRNA_244	-0.233981	-0.563308
gRNA_245	0.182194	-0.219168
gRNA_249	0.458739	0.371799
gRNA_250	0.00601965	-0.0377112
gRNA_252	0.327413	0.34219
gRNA_253	0.362268	0.409488
gRNA_254	0.265075	0.236422
gRNA_257	-0.000207096	-0.633926
gRNA_258	0.0129173	-0.285932
gRNA_259	-0.0493112	-0.35468
gRNA_260	-0.937789	-0.913517
gRNA_264	0.493672	0.203619
gRNA_265	0.0284313	-0.322914
gRNA_267	-0.0475094	-0.251318
gRNA_269	-0.603014	-1.10281
gRNA_272	0.221985	-0.0560313
gRNA_274	-0.502116	-0.574252
gRNA_278	0.286152	0.108847
gRNA_281	0.289791	0.200171
gRNA_283	-0.673403	-0.973516
gRNA_284	0.0611205	-0.358711
gRNA_285	0.301712	-0.00201543
gRNA_287	-0.0444975	-0.0435233
gRNA_292	-0.711812	-1.15424
gRNA_294	0.0193989	-0.294858
gRNA_295	0.216605	-0.098275
gRNA_297	-0.643084	-0.951978
gRNA_299	0.193729	0.0516302
gRNA_301	-0.606616	-1.40123
gRNA_302	-0.0908243	-0.438797
gRNA_303	0.525393	0.127535
gRNA_305	-0.625166	-0.766584
gRNA_307	-0.407388	-1.29003
gRNA_311	0.328404	0.198198
gRNA_314	0.326867	0.14711
gRNA_317	-0.0828565	-0.555049
gRNA_318	0.0889359	-0.257967
gRNA_323	-0.393375	-0.962225
gRNA_324	-0.54243	-1.34547
gRNA_326	0.0826038	-0.464029
gRNA_328	-0.0603966	-0.350722
gRNA_329	-0.0841095	-0.388288
gRNA_330	0.178001	0.304445
gRNA_331	-0.664532	-1.13777
gRNA_332	-0.82256	-1.62283
gRNA_333	-0.337306	-0.748593
gRNA_335	0.194464	-0.0352493
gRNA_339	0.0190788	-0.583605
gRNA_347	-0.096845	-0.407033
gRNA_348	-0.0104778	-0.259733
gRNA_349	0.570056	0.323742
gRNA_350	-0.344624	-1.14773
gRNA_352	0.220864	-0.167785
gRNA_356	0.106894	0.00466156
gRNA_358	0.658743	0.617724
gRNA_360	0.0536181	-0.0296874
gRNA_361	0.23276	0.092872
gRNA_362	0.259747	-0.0312596
gRNA_363	-0.0460979	-0.459302
gRNA_367	0.0731794	-0.159146
gRNA_368	0.974365	1.12356
gRNA_374	0.242897	-0.00652417
gRNA_375	-0.371371	-1.13053
gRNA_379	-0.784283	-1.26926
gRNA_381	0.663422	0.527915
gRNA_384	0.600175	0.258227
gRNA_386	-0.249926	-0.66653
gRNA_389	-0.114775	-0.370591
gRNA_390	0.0710818	-0.55584
gRNA_392	0.201361	0.0273308
gRNA_394	0.0296966	-0.359542
gRNA_396	0.294251	0.0198243
gRNA_397	-0.170567	-0.56134
gRNA_398	-0.0483638	-0.435432
gRNA_399	-0.0353607	-0.507891
gRNA_401	-0.0202026	-0.336016
gRNA_403	-0.259022	-0.914751
gRNA_406	0.195363	0.41642
gRNA_409	0.234107	0.0642441
gRNA_411	-0.521051	-1.30822
gRNA_413	-0.212098	-0.600712
gRNA_415	0.454928	0.437153
gRNA_416	-0.0902051	-0.195114
gRNA_419	-0.0763612	-0.275892
gRNA_423	-0.503787	-1.01682
gRNA_425	0.0236063	-0.336835
gRNA_430	0.0824107	-0.262489
gRNA_431	0.868139	0.434766
gRNA_432	-0.0116503	-0.333924
gRNA_433	0.414811	0.359512
gRNA_434	0.030975	-0.0531945
gRNA_436	0.310712	0.30833
gRNA_439	0.151861	-0.0589679
gRNA_440	-0.647164	-0.788578
gRNA_443	0.131127	-0.0254363
gRNA_445	-0.431878	-1.09908
gRNA_446	0.701633	0.395817
gRNA_448	-0.2299	-0.526812
gRNA_449	-0.217825	-1.10704
gRNA_451	-0.0530064	-0.111839
gRNA_452	-0.403602	-0.97185
gRNA_458	-0.784063	-1.31307
gRNA_459	0.0945499	0.0846396
gRNA_460	-0.00401496	-0.568441
gRNA_462	-0.659407	-0.743291
gRNA_464	0.612475	0.439182
gRNA_465	-0.0556506	-0.25875
gRNA_466	-0.279962	-0.943498
gRNA_469	-0.184852	-0.658388
gRNA_471	-0.302419	-1.32881
gRNA_473	0.257663	0.171488
gRNA_474	-0.159136	-0.969168
gRNA_475	-0.198152	-0.611627
gRNA_478	-0.301275	-0.849879
gRNA_479	0.0626355	-0.56134
gRNA_480	-0.0711904	-0.571993
gRNA_482	0.0744761	-0.131657
gRNA_483	-0.114283	-0.559002
gRNA_484	0.0576556	0.101455
gRNA_485	-0.0666161	-0.405683
gRNA_486	0.405167	0.324724
gRNA_491	-0.513763	-0.896611
gRNA_492	-0.475696	-1.38796
gRNA_493	-0.420808	-0.643522
gRNA_494	-0.0603342	-0.537701
gRNA_495	-0.689699	-0.665422
gRNA_496	0.0128455	-0.255695
gRNA_497	0.260463	0.788424
gRNA_507	-0.586704	-0.937001
gRNA_509	-0.231043	-0.465794
gRNA_511	0.0143704	0.360917
gRNA_512	-0.129144	-0.715712
gRNA_513	0.00213849	-0.404405
gRNA_514	-0.105754	-0.278166
gRNA_515	0.822421	0.66907
gRNA_517	0.221439	0.361465
gRNA_518	-0.277566	-0.607089
gRNA_520	-0.206867	-0.164298
gRNA_521	-0.0555976	-0.138228
gRNA_524	0.130015	0.0901162
gRNA_527	-0.302256	-0.489374
gRNA_532	0.13566	0.154809
gRNA_533	0.165683	0.136957
gRNA_535	-0.052211	-0.766747
gRNA_536	0.21207	-0.213786
gRNA_538	-0.79205	-1.03543
gRNA_539	-0.308679	-0.615227
gRNA_540	-0.350452	-1.43663
gRNA_544	0.243587	-0.0155813
gRNA_545	0.214596	-0.102249
gRNA_547	-0.242121	-1.30773
gRNA_550	0.372303	-0.0555339
gRNA_551	-0.216529	-0.49798
gRNA_553	0.380635	0.160062
gRNA_554	0.00339929	-0.312158
gRNA_555	0.00730381	-0.481183
gRNA_558	-0.174248	-0.749805
gRNA_559	-0.0857401	0.144982
gRNA_562	0.232481	0.318408
gRNA_563	-0.315959	-0.730479
gRNA_564	-0.345554	-0.0719389
gRNA_565	0.228105	0.0222435
gRNA_566	-0.184646	-0.708202
gRNA_572	-0.359808	-0.821372
gRNA_573	0.347177	0.250758
gRNA_574	-0.186287	-0.5607
gRNA_578	-0.383201	-0.56134
gRNA_579	-0.335452	-0.800263
gRNA_581	0.0446705	-0.315967
gRNA_583	-0.287753	-0.631553
gRNA_586	-0.500733	-1.05936
gRNA_587	0.842087	0.895766
gRNA_588	0.617594	0.488085
gRNA_592	-0.682515	-0.65825
gRNA_598	0.600002	0.620726
gRNA_599	-0.171054	-0.287871
gRNA_601	0.34523	0.1924
gRNA_603	-0.489888	-1.48647
gRNA_604	0.229464	0.209745
gRNA_606	-0.369277	-0.905402
gRNA_610	0.0643989	-0.238288
gRNA_612	-0.192101	-0.622989
gRNA_617	0.127364	0.334361
gRNA_619	0.434511	0.539839
gRNA_621	0.197082	-0.143119
gRNA_623	0.304782	-0.221239
gRNA_624	-0.496698	-0.8649
gRNA_625	-0.0525832	0.0439898
gRNA_631	0.0771157	-0.193676
gRNA_637	0.00624529	0.193816
gRNA_642	-0.0111146	-0.507694
gRNA_643	-0.120232	-0.701669
gRNA_644	0.91322	0.950563
gRNA_645	0.450127	0.257269
gRNA_646	-0.545224	-1.34547
gRNA_647	0.163547	-0.0885625
gRNA_648	0.306741	-0.112574
gRNA_649	-0.0896815	-0.61336
gRNA_650	0.047085	-0.167452
gRNA_655	-0.405316	-1.30598
gRNA_660	0.49225	0.316836
gRNA_661	-0.0702051	-0.744398
gRNA_662	0.246743	-0.105332
gRNA_664	0.263258	-0.106379
gRNA_666	-0.112913	-0.773277
gRNA_667	0.257555	-0.174692
gRNA_674	0.202575	0.24358
gRNA_675	-0.0812514	-0.162739
gRNA_676	-0.09674	-0.65794
gRNA_677	0.310598	0.330287
gRNA_678	0.151403	-0.146581
gRNA_681	-0.418384	-0.593932
gRNA_682	-0.704417	-0.905402
gRNA_683	-0.779431	-0.755158
gRNA_687	0.636714	0.575748
gRNA_688	0.109903	-1.38186
gRNA_690	0.232582	0.0529158
gRNA_691	0.571253	0.312125
gRNA_692	-0.382698	-1.1548
gRNA_693	0.426742	0.55919
gRNA_695	-0.0555625	-0.36446
gRNA_696	0.544329	0.495242
gRNA_697	0.0266696	-0.033095
gRNA_705	0.510479	0.601014
gRNA_706	0.209979	-0.275377
gRNA_707	0.679694	0.535937
gRNA_708	0.207483	-0.105798
gRNA_709	0.00777463	0.403417
gRNA_711	-0.101914	-0.0915958
gRNA_713	-0.167488	-0.390211
gRNA_716	0.151625	-0.0582596
gRNA_717	-0.204072	-0.448929
gRNA_718	0.0421711	-0.567303
gRNA_719	0.183298	-0.0278339
gRNA_720	0.0486306	-0.166724
gRNA_722	-0.139178	-0.584688
gRNA_724	0.44232	0.336565
gRNA_725	0.228592	0.13827
gRNA_726	0.115051	-0.0567775
gRNA_727	0.306926	-0.083214
gRNA_728	0.282379	0.178153
gRNA_729	0.302173	0.0552
gRNA_731	0.438195	0.434146
gRNA_732	0.255545	-0.191936
gRNA_733	-0.117025	-0.267665
gRNA_736	0.285247	0.0369228
gRNA_739	1.0604	1.23528
gRNA_741	-0.203676	-0.409238
gRNA_744	0.210838	0.0144323
gRNA_749	0.665793	0.463928
gRNA_755	0.0827323	-0.794801
gRNA_757	-0.151542	-1.36297
gRNA_758	-0.220988	-0.471681
gRNA_760	0.0539845	-0.121192
gRNA_762	-0.00764293	-0.267841
gRNA_763	0.501997	0.325464
gRNA_764	-0.0213756	-0.721222
gRNA_765	-0.154393	-0.484174
gRNA_769	0.341296	-0.249014
gRNA_772	-0.644724	-0.620459
gRNA_774	0.146502	-0.246328
gRNA_779	-0.147438	-0.212795
gRNA_780	0.218014	-0.56134
gRNA_781	-0.268831	-1.39331
gRNA_790	-0.447445	-1.31234
gRNA_792	-0.545805	-1.2763
gRNA_794	-0.424761	-1.52815
gRNA_797	-0.6267	-1.05618
gRNA_799	0.00573227	-0.709941
gRNA_800	0.182161	-0.253811
gRNA_802	0.459947	-0.161061
gRNA_803	-0.885269	-1.10799
gRNA_804	-0.0821608	-0.596891
gRNA_807	-0.0968163	-0.700409
gRNA_808	-0.272875	-0.752652
gRNA_810	-0.306211	-0.686517
gRNA_811	-0.0694297	-0.218663
gRNA_812	0.144296	-0.38022
gRNA_813	0.527457	0.378196
gRNA_814	0.0843097	-0.104023
gRNA_816	-0.189628	-0.905402
gRNA_817	0.492231	0.261715
gRNA_819	0.232822	-0.107011
gRNA_822	-0.147822	-0.164192
gRNA_823	0.192141	0.0953608
gRNA_825	-0.138496	-0.56134
gRNA_826	0.381138	0.203312
gRNA_827	-0.105986	-0.631884
gRNA_832	0.0247126	-0.327915
gRNA_833	0.224269	0.0878761
gRNA_836	0.238467	0.297676
gRNA_838	0.0683996	-0.529851
gRNA_839	-0.414548	-0.868407
gRNA_847	-0.442364	-1.23802
gRNA_848	-0.300869	-0.686734
gRNA_852	0.370716	0.312221
gRNA_854	0.283983	0.245261
gRNA_855	-0.0968728	-0.148412
gRNA_857	-0.133512	-0.383236
gRNA_858	0.141744	0.126637
gRNA_861	0.339415	0.136269
gRNA_863	-0.0022033	-0.519029
gRNA_864	-0.0361544	-0.394907
gRNA_866	-0.279771	-0.958304
gRNA_868	-0.195744	-0.522525
gRNA_869	0.00969637	-0.331499
gRNA_870	0.344264	0.00285253
gRNA_872	-0.197906	-0.926202
gRNA_873	0.529064	0.336437
gRNA_876	-0.0974443	-0.54369
gRNA_879	-0.221437	-0.637376
gRNA_880	0.245352	0.416814
gRNA_881	0.284094	0.133216
gRNA_882	0.0447272	-0.351681
gRNA_884	0.113127	0.214603
gRNA_885	0.372282	0.450504
gRNA_886	0.0538189	-0.432733
gRNA_888	1.05986	1.10793
gRNA_889	0.211348	-0.205834
gRNA_892	-0.2066	-0.958703
gRNA_896	-0.163435	-0.476546
gRNA_899	0.012239	-0.0595897
gRNA_901	-0.454385	-0.788578
gRNA_906	-0.461732	-0.937336
gRNA_907	-0.676676	-1.49247
gRNA_911	-0.179037	-0.536752
gRNA_916	-0.127896	-0.325069
gRNA_918	0.063623	0.0239745
gRNA_920	-0.434129	-1.16791
gRNA_921	-0.881405	-1.40514
gRNA_922	-0.372612	-1.24932
gRNA_924	-0.325652	-0.924006
gRNA_930	0.0580831	0.276123
gRNA_934	0.261398	-0.0396953
gRNA_937	-0.388789	-1.52454
gRNA_938	-0.118343	-0.492627
gRNA_939	-0.0162396	-0.449744
gRNA_940	0.133941	0.0378426
gRNA_943	0.104012	-0.185286
gRNA_944	-0.610597	-0.951939
gRNA_946	0.159408	-0.126301
gRNA_947	0.258043	-0.0498932
gRNA_948	-0.299089	-0.689211
gRNA_950	0.788497	0.749955
gRNA_951	0.135018	-0.0746804
gRNA_952	-0.00330616	-0.239914
gRNA_953	0.0749742	-0.231274
gRNA_956	0.0235684	-0.620172
gRNA_963	-0.755623	-0.731355
gRNA_964	0.00817777	-0.203487
gRNA_966	0.0249184	0.0148833
gRNA_968	0.0503033	-0.207101
gRNA_969	-0.703704	-0.679437
gRNA_971	0.255826	0.253654
gRNA_973	0.20323	-0.203196
gRNA_975	-0.594057	-0.77219
gRNA_978	0.0864949	-0.14325
gRNA_980	-0.169197	-0.280624
gRNA_981	-0.294043	-0.935738
gRNA_983	-0.00588619	-0.285447
gRNA_984	0.309936	-0.0712944
gRNA_985	-0.596844	-1.07598
gRNA_987	-0.15282	-0.615114
gRNA_993	0.192996	-0.254603
gRNA_995	0.0324429	-0.418048
gRNA_996	-0.237085	-0.290621
gRNA_1007	0.337037	-0.172845
gRNA_1008	-0.139613	-0.755293
gRNA_1011	-0.179426	-0.869237
gRNA_1016	-0.362494	-1.32282
gRNA_1017	-0.0889274	-0.990685
gRNA_1020	0.0274587	-0.323687
gRNA_1022	-0.0729125	-0.487116
gRNA_1024	-0.15252	-0.516655
gRNA_1026	0.103664	-0.175053
gRNA_1027	0.424833	0.190069
gRNA_1028	0.193397	-0.117172
gRNA_1031	0.0580469	-0.186683
gRNA_1032	0.423739	0.583589
gRNA_1033	-0.214128	-0.952797
gRNA_1034	-0.0100353	-0.209953
gRNA_1035	0.524097	0.513344
gRNA_1036	-0.00139856	-0.269137
gRNA_1038	-0.468375	-1.34872
gRNA_1042	-0.0194872	0.103531
gRNA_1043	-0.0235825	-0.332351
gRNA_1045	-0.0905481	-0.147037
gRNA_1046	0.47632	0.322147
gRNA_1048	0.158407	-0.194337
gRNA_1049	-0.410214	-1.13714
gRNA_1052	0.11432	0.0963161
gRNA_1056	0.0919118	-0.13836
gRNA_1060	0.284197	-0.175398
gRNA_1064	-0.0366561	-0.446869
gRNA_1067	0.101672	-0.164687
gRNA_1069	-0.365699	-0.848803
gRNA_1070	-0.195331	-0.486109
gRNA_1072	0.243584	0.145129
gRNA_1073	0.0932706	-0.22437
gRNA_1074	0.265282	-0.0427385
gRNA_1076	1.09536	1.00448
gRNA_1082	0.35734	0.195921
gRNA_1083	-0.706429	-1.03238
gRNA_1085	0.226103	0.0110602
gRNA_1086	0.126407	-0.557888
gRNA_1087	-0.761695	-0.737431
gRNA_1088	-0.105105	-0.0616746
gRNA_1091	-0.0789637	-0.424264
gRNA_1093	0.924683	0.217636
gRNA_1098	-0.0356382	-0.544619
gRNA_1099	0.371416	0.390443
gRNA_1106	0.00432293	-0.424445
gRNA_1108	0.787206	0.53638
gRNA_1109	0.272618	0.076703
gRNA_1110	0.293074	0.265361
gRNA_1111	0.0366613	-0.294097
gRNA_1112	0.232519	-0.290045
gRNA_1114	0.388234	0.108525
gRNA_1118	-0.62235	-1.24932
gRNA_1119	0.132926	-0.175374
gRNA_1121	-0.361819	-0.641648
gRNA_1124	0.0132473	-0.347859
gRNA_1125	-0.0619913	-0.905311
gRNA_1127	0.119254	-0.167641
gRNA_1128	-0.564871	-1.28664
gRNA_1130	-0.50359	-1.3257
gRNA_1132	-0.024994	-0.586633
gRNA_1135	-0.703326	-0.966456
gRNA_1137	-0.0429239	-0.426062
gRNA_1138	0.167948	-0.115716
gRNA_1139	0.0383792	-0.505275
gRNA_1142	-0.594558	-0.570286
gRNA_1143	0.975049	0.819813
gRNA_1144	0.0173078	0.0883986
gRNA_1145	-0.754132	-1.1634
gRNA_1146	-0.131109	-1.34696
gRNA_1148	-0.328347	-0.845176
gRNA_1149	-0.531702	-0.980467
gRNA_1151	-0.463007	-0.616995
gRNA_1152	-0.507453	-1.55678
gRNA_1153	0.383864	0.304767
gRNA_1154	-0.387975	-0.696518
gRNA_1156	0.150375	0.0592378
gRNA_1158	0.0318377	-0.31244
gRNA_1159	0.360229	0.413288
gRNA_1161	0.593273	0.603778
gRNA_1163	-0.247606	-0.7708
gRNA_1164	0.0780881	-0.410266
gRNA_1165	0.548561	0.462183
gRNA_1166	0.492095	0.572009
gRNA_1169	0.1163	-0.100727
gRNA_1170	0.189707	0.0494122
gRNA_1171	-0.121774	-0.465169
gRNA_1172	-0.0713512	-0.811565
gRNA_1173	0.437934	0.153478
gRNA_1176	-0.0658523	-0.601196
gRNA_1177	0.531408	0.124553
gRNA_1178	-0.478968	-0.997365
gRNA_1181	-0.43215	-0.905402
gRNA_1184	-0.0125616	-0.231638
gRNA_1185	-0.675496	-0.829484
gRNA_1186	-0.011954	-0.393122
gRNA_1187	0.247271	0.0771061
gRNA_1189	-0.449971	-1.12808
gRNA_1190	0.531285	0.75844
gRNA_1191	0.508386	0.486466
gRNA_1192	0.00396566	-0.424623
gRNA_1194	-0.197696	-0.562563
gRNA_1195	-0.326419	-0.621987
gRNA_1197	-0.21204	-0.804973
gRNA_1198	0.0468416	-0.117024
gRNA_1199	-0.667798	-0.643522
gRNA_1200	0.239603	-0.00903162
gRNA_1201	-0.186409	-0.705937
gRNA_1202	0.318139	0.213453
gRNA_1203	-0.306173	-0.889999
gRNA_1208	0.0494453	-0.176139
gRNA_1212	0.695835	0.129562
gRNA_1214	0.124801	0.0988073
gRNA_1215	0.316712	-0.0108311
gRNA_1216	-0.872849	-0.848577
gRNA_1217	-0.564764	-0.871511
gRNA_1220	0.704213	0.501483
gRNA_1222	-0.284883	-1.04367
gRNA_1223	0.516877	0.34027
gRNA_1225	0.23406	0.379891
gRNA_1227	0.567305	0.357218
gRNA_1229	-0.419214	-1.05327
gRNA_1230	0.353295	0.10898
gRNA_1232	1.07673	0.807808
gRNA_1233	-0.0111879	-0.119924
gRNA_1234	-0.912966	-0.888696
gRNA_1236	-0.473903	-1.22053
gRNA_1237	-0.605033	-1.57382
gRNA_1239	0.807006	0.484708
gRNA_1243	0.0831803	-0.598519
gRNA_1244	-0.08288	-0.208355
gRNA_1246	-0.0168226	-0.592165
gRNA_1247	0.308599	-0.0704473
gRNA_1253	-0.631151	-0.724623
gRNA_1255	0.92581	0.994952
gRNA_1258	0.864896	0.453594
gRNA_1259	0.198722	-0.0906682
gRNA_1261	-0.0100548	-0.358894
gRNA_1262	-0.0978894	-0.56134
gRNA_1263	-0.1521	-0.0866424
gRNA_1264	0.164143	-0.0666558
gRNA_1265	0.21487	-0.285568
gRNA_1267	0.528566	0.40367
gRNA_1269	-0.00891083	-0.545226
gRNA_1271	-0.648809	-0.921489
gRNA_1275	-0.0992131	-0.52227
gRNA_1276	0.292867	0.260472
gRNA_1277	0.232788	-0.0149276
gRNA_1278	0.932247	0.767626
gRNA_1279	-0.568393	-1.07044
gRNA_1281	0.351927	0.602219
gRNA_1282	0.102473	-1.02611
gRNA_1283	-0.937789	-0.913517
gRNA_1284	-0.0137373	-0.0643304
gRNA_1287	0.456334	0.325603
gRNA_1289	-0.397465	-0.797833
gRNA_1292	-0.0477463	-0.418445
gRNA_1294	-0.200401	-0.416474
gRNA_1295	0.221634	0.0191153
gRNA_1297	0.242047	0.224833
gRNA_1298	0.27588	0.301963
gRNA_1300	-0.248772	-1.13777
gRNA_1301	-0.603051	-0.875732
gRNA_1302	0.0398245	-0.104974
gRNA_1306	0.394407	0.0981805
gRNA_1310	0.200155	-0.0292495
gRNA_1312	-0.617706	-1.28834
gRNA_1317	0.114126	-0.19103
gRNA_1324	0.0566317	-0.345476
gRNA_1325	-0.711976	-1.12808
gRNA_1327	-0.328165	-0.737431
gRNA_1328	0.707986	0.344976
gRNA_1331	0.0476289	0.112471
gRNA_1336	-0.536192	-1.09081
gRNA_1337	-0.384859	-1.43032
gRNA_1339	-0.724694	-0.997365
gRNA_1340	-0.313085	-1.23228
gRNA_1342	0.350185	0.322489
gRNA_1345	0.321005	0.182332
gRNA_1346	-0.390602	-0.987304
gRNA_1347	0.017	-0.108017
gRNA_1348	0.0693128	-0.216106
gRNA_1350	-0.676872	-0.977005
gRNA_1354	0.498766	0.339618
gRNA_1355	0.0341077	-0.255167
gRNA_1356	0.0650322	-0.114568
gRNA_1357	0.158948	-0.0922076
gRNA_1358	0.184493	-0.131148
gRNA_1360	-0.476418	-1.19607
gRNA_1361	0.418945	0.240624
gRNA_1369	-0.802345	-0.980467
gRNA_1372	-0.0740113	-0.684383
gRNA_1376	-0.254944	-0.84569
gRNA_1378	0.263599	0.245066
gRNA_1379	-0.177706	-0.836119
gRNA_1382	0.0496009	-0.410879
gRNA_1383	0.183101	-0.066761
gRNA_1384	-0.650096	-1.36723
gRNA_1385	-0.119367	-0.197762
gRNA_1387	1.16546	1.00625
gRNA_1388	-0.01259	-0.0689508
gRNA_1394	0.264749	-0.0518397
gRNA_1398	0.171561	-0.124346
gRNA_1402	-0.164822	-0.506773
gRNA_1404	0.108762	-0.238397
gRNA_1407	0.18604	-0.141633
gRNA_1408	0.0352565	-0.264539
gRNA_1409	-0.687289	-1.26569
gRNA_1412	-0.196634	0.0683022
gRNA_1413	-0.256142	-0.923406
gRNA_1416	0.0967483	-0.167589
gRNA_1424	-0.0396213	-0.450056
gRNA_1425	-0.11415	-0.465632
gRNA_1426	-0.241979	-0.836379
gRNA_1427	0.0647202	-0.184774
gRNA_1428	-0.52875	-1.14727
gRNA_1430	0.0222637	-0.144347
gRNA_1431	-0.243357	-0.412866
gRNA_1434	-0.0804367	-0.534772
gRNA_1435	-0.0577792	-0.234478
gRNA_1439	0.535131	0.539341
gRNA_1441	0.429455	0.00786298
gRNA_1442	0.0678624	-0.0778344
gRNA_1443	0.166486	0.02799
gRNA_1445	0.0447394	-0.465549
gRNA_1448	0.208047	-0.0519523
gRNA_1455	-0.0130963	-0.00665524
gRNA_1458	0.212073	0.340469
gRNA_1459	0.554404	0.459095
gRNA_1463	-0.27081	-0.944552
gRNA_1466	0.0177322	-0.357928
gRNA_1470	0.188629	0.223018
gRNA_1471	0.498642	0.232221
gRNA_1473	0.161113	-0.142534
gRNA_1476	0.200275	0.0758975
gRNA_1479	-0.247754	-0.523549
gRNA_1480	0.592982	0.480508
gRNA_1481	0.131502	-0.598506
gRNA_1482	0.364394	0.38231
gRNA_1483	-0.55237	-0.980025
gRNA_1485	-0.564983	-0.965129
gRNA_1487	-0.724228	-1.09757
gRNA_1489	0.0447703	-0.109352
gRNA_1490	-0.0159942	-0.365742
gRNA_1491	-0.504449	-1.22448
gRNA_1493	0.1151	0.169372
gRNA_1497	0.460291	0.00625099
gRNA_1499	-0.223675	-0.067045
gRNA_1500	-0.384302	-1.14365
gRNA_1502	0.0178292	-0.305632
gRNA_1505	0.2499	0.313443
gRNA_1507	-0.0351537	-0.672486
gRNA_1508	0.103169	-0.602267
gRNA_1509	0.00233364	-0.171129
gRNA_1511	0.881576	0.371528
gRNA_1514	0.47525	0.31385
gRNA_1518	0.383509	0.297189
gRNA_1519	-0.0691617	-1.26926
gRNA_1522	-0.108379	-0.743283
gRNA_1524	0.695742	0.576345
gRNA_1525	0.0970386	-0.556864
gRNA_1529	0.302171	-0.298917
gRNA_1531	0.199784	0.048652
gRNA_1534	-0.3201	-0.781495
gRNA_1535	0.00471886	-0.193742
gRNA_1536	-0.211042	-0.56134
gRNA_1537	-0.241653	-1.25484
gRNA_1538	0.342701	0.403104
gRNA_1539	-0.576267	-1.11561
gRNA_1541	0.534787	0.785304
gRNA_1542	0.359088	0.297874
gRNA_1544	0.365699	-0.0802698
gRNA_1549	0.386051	0.426848
gRNA_1550	-0.0471854	-0.425109
gRNA_1552	0.0263747	-0.0383295
gRNA_1553	0.280312	0.295087
gRNA_1556	-0.626972	-1.24678
gRNA_1557	-0.20613	-0.919725
gRNA_1559	-0.667798	-0.643522
gRNA_1560	0.162702	0.0225076
gRNA_1562	0.0364064	-0.718942
gRNA_1563	-0.0186954	-0.291954
gRNA_1564	-0.104233	-0.414429
gRNA_1565	-0.0187417	-0.367112
gRNA_1566	-0.328249	-0.668135
gRNA_1567	0.255479	0.186447
gRNA_1569	0.10212	0.0974435
gRNA_1570	0.399693	0.564616
gRNA_1574	-0.127755	-0.778363
gRNA_1575	-0.211346	-0.884167
gRNA_1576	0.278131	0.0792438
gRNA_1578	-0.0103646	0.0209072
gRNA_1580	0.37035	0.259461
gRNA_1582	0.176741	0.0585523
gRNA_1583	-0.336361	-1.07808
gRNA_1584	0.357591	-0.315945
gRNA_1587	-0.224593	-1.24253
gRNA_1589	-0.160967	-0.311077
gRNA_1592	0.22275	-0.392678
gRNA_1593	0.269043	-0.1749
gRNA_1595	0.258956	0.115214
gRNA_1598	-0.223679	-0.533454
gRNA_1600	0.535457	0.217577
gRNA_1608	-0.872849	-0.848577
gRNA_1609	-0.347209	-1.03122
gRNA_1612	-0.543571	-1.37349
gRNA_1613	-0.364277	-0.428439
gRNA_1615	0.0110378	-0.323125
gRNA_1616	0.341715	0.255829
gRNA_1618	0.444749	0.264495
gRNA_1619	0.701833	0.224152
gRNA_1621	1.41	1.72958
gRNA_1622	0.266981	0.255061
gRNA_1624	0.118857	-0.132608
gRNA_1629	0.201994	-0.0423229
gRNA_1631	-0.0115901	-0.436587
gRNA_1632	-0.00395182	-0.20018
gRNA_1633	0.629086	0.404647
gRNA_1634	0.598273	0.719227
gRNA_1636	-0.611936	-0.587666
gRNA_1638	-0.378299	-1.21656
gRNA_1641	0.00303848	-0.277198
gRNA_1642	0.163476	0.144112
gRNA_1644	-0.782659	-1.43398
gRNA_1656	-0.263201	-0.238536
gRNA_1657	-0.159481	-0.510063
gRNA_1659	-0.785384	-0.997365
gRNA_1662	-0.214825	-0.674617
gRNA_1666	-0.242198	-0.695119
gRNA_1667	0.163669	-0.622558
gRNA_1672	-0.114259	-0.362349
gRNA_1673	-0.596383	-1.33341
gRNA_1674	0.0122674	-0.127424
gRNA_1679	-0.282294	0.00666017
gRNA_1681	-0.790151	-1.05327
gRNA_1682	-0.765236	-1.27279
gRNA_1683	-0.252551	-0.573732
gRNA_1685	-0.060284	-0.518823
gRNA_1686	-0.0425951	-0.620664
gRNA_1688	-0.164736	-1.10008
gRNA_1689	-0.285823	-0.385666
gRNA_1690	-0.224627	-0.523343
gRNA_1692	0.158938	-0.270361
gRNA_1693	0.143678	-0.312509
gRNA_1694	0.0528623	-0.323771
gRNA_1695	-0.715881	-0.959275
gRNA_1696	-0.173944	-0.533195
gRNA_1698	0.00431835	-0.312125
gRNA_1699	-0.0495885	-0.650221
gRNA_1701	0.321352	0.19165
gRNA_1703	-0.660239	-0.635966
gRNA_1704	0.0520855	-0.564148
gRNA_1706	-0.524569	-1.2407
gRNA_1707	-0.685149	-0.839139
gRNA_1711	-0.0832353	-0.747759
gRNA_1713	-0.382432	-1.26469
gRNA_1714	-0.332884	-0.592938
gRNA_1715	0.0233319	-0.802066
gRNA_1716	-0.0268111	-0.266673
gRNA_1720	-0.0199655	0.0380762
gRNA_1723	0.239316	0.00773462
gRNA_1724	0.465535	0.303416
gRNA_1735	-0.00613612	-0.587803
gRNA_1737	-0.463113	-0.774594
gRNA_1739	-0.037387	-0.339675
gRNA_1740	0.232945	0.0275695
gRNA_1742	0.247035	0.368549
gRNA_1743	0.0818739	-0.2026
gRNA_1745	-0.398901	-1.31942
gRNA_1746	-0.286193	-0.87552
gRNA_1748	0.341243	0.242529
gRNA_1749	0.0836432	-0.0894207
gRNA_1752	0.12812	-0.215452
gRNA_1753	0.464648	0.0642515
gRNA_1754	-0.13075	-0.789264
gRNA_1755	1.04517	1.42192
gRNA_1758	0.165658	-0.650948
gRNA_1759	0.17519	-0.245576
gRNA_1760	-0.146887	-0.354888
gRNA_1761	-0.491338	-1.20847
gRNA_1762	0.36894	0.206921
gRNA_1763	-0.336206	-0.361716
gRNA_1769	0.20438	-0.0114696
gRNA_1770	-0.103625	-0.78496
gRNA_1771	-0.0467481	-0.141099
gRNA_1775	-0.613321	-0.955644
gRNA_1780	-0.729096	-1.15195
gRNA_1781	0.0652829	-0.241459
gRNA_1783	0.391903	0.00375771
gRNA_1785	0.330679	0.209085
gRNA_1786	0.819634	0.506766
gRNA_1787	0.142888	-0.0616068
gRNA_1788	-0.11979	-0.442605
gRNA_1792	-0.357207	-0.731423
gRNA_1793	0.160254	-0.19482
gRNA_1795	0.130882	-0.120093
gRNA_1796	0.317872	0.0910184
gRNA_1797	-0.245777	-0.396476
gRNA_1804	0.0155952	-0.42407
gRNA_1807	0.100662	-0.0917813
gRNA_1809	-0.690047	-1.03238
gRNA_1810	0.452168	0.474354
gRNA_1811	-0.471042	-1.28493
gRNA_1817	-0.0128023	-0.144571
gRNA_1818	0.336088	0.00125164
gRNA_1819	0.512167	0.53825
gRNA_1820	0.140833	-0.0996085
gRNA_1825	-0.198382	-0.533919
gRNA_1828	0.212521	-0.108998
gRNA_1830	-0.584158	-1.01364
gRNA_1831	-0.171675	-0.620459
gRNA_1835	-0.0553479	-0.521963
gRNA_1836	-0.424002	-1.21856
gRNA_1838	-0.741193	-1.03238
gRNA_1847	-0.334153	-0.570286
gRNA_1849	0.10671	0.11854
gRNA_1851	-0.121046	-0.449742
gRNA_1852	0.102901	0.243429
gRNA_1854	-0.735368	-1.63977
gRNA_1855	-1.11388	-1.08962
gRNA_1857	-0.676994	-1.22645
gRNA_1858	-0.108013	-0.575234
gRNA_1861	0.227659	-0.202601
gRNA_1866	0.225196	0.0850492
gRNA_1867	-0.321072	-0.89
gRNA_1868	-0.215001	-0.651341
gRNA_1873	0.0786623	-0.0688331
gRNA_1874	0.0132386	-0.0691465
gRNA_1875	0.0231446	-0.346143
gRNA_1878	-0.0471543	-0.265392
gRNA_1879	0.42541	0.370949
gRNA_1880	0.165095	0.171116
gRNA_1882	-0.262789	-0.801625
gRNA_1887	-0.719128	-1.16791
gRNA_1891	-0.684356	-0.917521
gRNA_1895	-0.161101	-0.588505
gRNA_1898	-0.0166321	-0.340085
gRNA_1899	-0.0480114	-0.274394
gRNA_1900	-0.0347816	-0.374212
gRNA_1902	-0.00522765	-0.224545
gRNA_1904	-0.904364	-0.880093
gRNA_1905	-0.727825	-0.917521
gRNA_1908	-0.188858	-0.583439
gRNA_1909	-0.0489812	-0.624162
gRNA_1913	-0.0031024	-0.554472
gRNA_1918	-0.0156113	-0.308871
gRNA_1919	0.204065	0.405635
gRNA_1922	-0.790855	-0.766584
gRNA_1924	-0.0360001	-0.121782
gRNA_1925	0.66969	0.763682
gRNA_1926	0.55153	0.786632
gRNA_1927	0.454385	0.377783
gRNA_1928	-0.0830879	-0.958181
gRNA_1930	-0.240207	-0.530692
gRNA_1932	-0.237533	-0.585335
gRNA_1935	-0.305578	-0.621037
gRNA_1938	0.554051	0.72212
gRNA_1940	0.241704	0.0874295
gRNA_1948	1.06511	0.975925
gRNA_1951	0.0649924	-0.160562
gRNA_1953	0.452463	0.368785
gRNA_1954	-0.696855	-1.18761
gRNA_1958	0.139314	-0.103628
gRNA_1959	-0.0723991	0.187305
gRNA_1960	0.231297	0.335834
gRNA_1961	0.0385074	-0.0134745
gRNA_1962	0.0787563	-0.524379
gRNA_1963	-0.595823	-1.16448
gRNA_1964	0.850691	0.744738
gRNA_1965	0.0851344	0.0478612
gRNA_1968	-0.33234	-0.675854
gRNA_1971	0.313575	-0.060252
gRNA_1972	0.0701314	-0.482252
gRNA_1974	0.172111	-0.210982
gRNA_1975	-0.0786907	-0.271397
gRNA_1976	-0.17707	-0.886354
gRNA_1979	-0.1684	-0.348319
gRNA_1980	0.323883	0.0464657
gRNA_1982	-0.52245	-1.18546
gRNA_1983	-0.571197	-0.944552
gRNA_1984	0.0910531	-0.000526737
gRNA_1986	-0.110243	-0.255332
gRNA_1988	0.0469381	-0.272503
gRNA_1989	-0.227778	-0.838838
gRNA_1991	-0.0908688	-0.764589
gRNA_1994	0.16969	-0.00949892
gRNA_1997	0.0979948	-0.0828546
gRNA_1999	0.156739	0.0031705
gRNA_2000	-0.000530428	-0.338958
gRNA_2001	0.239288	0.355638
gRNA_2002	-0.0396503	-0.697821
gRNA_2004	-0.0732522	-0.439206
gRNA_2005	0.238692	0.116202
gRNA_2006	0.237672	0.155692
gRNA_2008	0.0796273	-0.317533
gRNA_2009	-0.0923808	-1.00293
gRNA_2010	0.145214	-0.0396712
gRNA_2012	-0.0997905	-0.319527
gRNA_2013	-0.305639	-0.587666
gRNA_2014	0.276739	0.171215
gRNA_2015	-0.140173	-0.381362
gRNA_2016	-0.251306	-0.853224
gRNA_2018	0.147999	0.191093
gRNA_2019	0.034352	-0.204115
gRNA_2020	0.00187807	-0.482277
gRNA_2021	0.279539	0.140728
gRNA_2022	-0.137095	-0.664493
gRNA_2023	-0.00555566	-0.281316
gRNA_2025	-0.0199365	-0.150341
gRNA_2026	0.0733612	-0.181468
gRNA_2027	-0.0707616	-0.632214
gRNA_2030	-0.58802	-1.25484
gRNA_2033	-0.208044	-0.846237
gRNA_2034	0.465422	0.500793
gRNA_2035	0.163212	0.107971
gRNA_2036	-0.563238	-1.21455
gRNA_2040	-0.363669	-0.614268
gRNA_2044	-0.0298279	-0.128049
gRNA_2046	0.0200767	-0.168782
gRNA_2047	-0.0854131	-0.532688
gRNA_2048	0.0285061	-0.430246
gRNA_2049	-0.0177047	-0.526827
gRNA_2051	0.373163	0.206895
gRNA_2053	-0.0165549	-0.155545
gRNA_2054	0.574627	0.40599
gRNA_2055	-0.0579449	-0.412865
gRNA_2056	-0.230465	-0.130903
gRNA_2057	-0.0932527	-0.501788
gRNA_2058	-0.310061	-0.96632
gRNA_2059	-0.718189	-0.884416
gRNA_2063	0.0187358	-0.0851216
gRNA_2065	-0.42445	-1.03381
gRNA_2066	-0.0437089	-0.388612
gRNA_2069	-0.0731087	-0.17401
gRNA_2070	-0.751032	-1.24746
gRNA_2071	0.422881	0.294889
gRNA_2078	0.250097	0.42144
gRNA_2079	0.495599	0.526257
gRNA_2080	0.195417	-0.199529
gRNA_2081	0.697377	1.03622
gRNA_2082	-0.104739	-0.180027
gRNA_2084	-0.119405	0.0530735
gRNA_2085	0.393548	0.427491
gRNA_2086	0.454178	0.235257
gRNA_2089	-0.110851	-0.128415
gRNA_2090	-0.0736089	-0.237159
gRNA_2094	-0.347486	-0.395147
gRNA_2099	-0.183697	-1.17234
gRNA_2102	-0.652002	-1.08149
gRNA_2105	-0.0381651	-0.300162
gRNA_2106	-0.379311	-1.16588
gRNA_2110	-0.09359	-0.330446
gRNA_2112	-0.783998	-0.92542
gRNA_2113	-0.14028	-0.87461
gRNA_2115	0.0444426	-0.0680564
gRNA_2117	0.418039	0.360632
gRNA_2120	-0.703232	-0.772492
gRNA_2121	-0.430454	-0.741922
gRNA_2122	0.307039	-0.463762
gRNA_2133	-0.181633	-0.661393
gRNA_2136	0.0591615	-0.210639
gRNA_2141	-0.00813069	-0.366349
gRNA_2142	-0.402995	-0.986378
gRNA_2143	0.687993	0.895427
gRNA_2147	-0.159909	-0.429262
gRNA_2148	0.563833	0.323381
gRNA_2149	0.594357	0.419827
gRNA_2150	-0.583712	-1.18251
gRNA_2152	0.438813	0.63798
gRNA_2153	-0.142263	-0.426123
gRNA_2155	-0.226425	-0.777724
gRNA_2156	-0.400859	-1.21565
gRNA_2160	-0.535722	-0.853224
gRNA_2161	-0.0133084	-0.18547
gRNA_2163	0.0750459	-0.125974
gRNA_2164	0.848604	0.91461
gRNA_2165	0.279514	0.14214
gRNA_2169	-0.257824	-0.715205
gRNA_2172	0.369868	0.30703
gRNA_2176	0.0181026	-0.228235
gRNA_2177	0.333285	0.183585
gRNA_2179	-0.472264	-1.00293
gRNA_2181	0.619182	0.558002
gRNA_2183	0.330912	-0.0314518
gRNA_2188	-0.121533	-0.543214
gRNA_2189	0.547894	0.481217
gRNA_2190	-0.217951	-0.551377
gRNA_2192	0.23191	-0.162058
gRNA_2193	0.161375	0.129987
gRNA_2196	-0.437214	-1.21477
gRNA_2199	-0.139229	-0.477537
gRNA_2201	-0.655629	-1.69329
gRNA_2203	-0.133663	0.144772
gRNA_2206	-0.201316	-0.401446
gRNA_2208	0.130146	-0.222151
gRNA_2209	0.185335	0.0448999
gRNA_2210	0.32797	0.0887287
gRNA_2211	0.148087	0.0819766
gRNA_2212	0.0960243	0.203451
gRNA_2213	0.0967212	0.0334868
gRNA_2214	-0.0724962	-0.14635
gRNA_2215	0.00847673	-0.120574
gRNA_2216	-0.157684	-0.586505
gRNA_2218	-0.0397275	-0.591088
gRNA_2220	-0.151015	-0.181774
gRNA_2221	0.29607	0.180043
gRNA_2222	0.457472	0.180498
gRNA_2223	-0.057922	-0.901284
gRNA_2227	0.612131	0.58995
gRNA_2228	0.0422132	-0.787012
gRNA_2229	-0.175333	-0.639028
gRNA_2230	-0.419918	-0.56134
gRNA_2231	0.53971	0.361257
gRNA_2233	-0.0434134	-0.524717
gRNA_2237	-0.327742	-0.818844
gRNA_2238	-0.101727	-0.330275
gRNA_2239	-0.118189	-0.452898
gRNA_2241	-0.12809	-0.467697
gRNA_2243	0.642189	0.528363
gRNA_2246	0.325373	0.374623
gRNA_2247	-0.230761	-0.659909
gRNA_2248	-0.54181	-1.44946
gRNA_2249	-0.126123	-0.458453
gRNA_2250	0.0506164	-0.332434
gRNA_2252	-0.130021	-0.607177
gRNA_2253	0.0924531	-0.179962
gRNA_2254	0.0490868	-0.464029
gRNA_2255	-0.0126945	-0.468574
gRNA_2257	0.237558	0.173322
gRNA_2261	0.127668	-0.21151
gRNA_2263	-0.0261769	-0.0319628
gRNA_2264	-0.441079	-0.975163
gRNA_2265	0.498653	0.567611
gRNA_2266	0.341163	0.343332
gRNA_2267	-0.119252	-0.387414
gRNA_2268	0.311012	0.309129
gRNA_2269	0.365093	0.379859
gRNA_2270	-0.065779	-0.0205099
gRNA_2272	0.20541	0.189477
gRNA_2273	0.0846147	-0.211421
gRNA_2274	-0.599837	-0.853224
gRNA_2275	-0.141758	-0.524041
gRNA_2276	-0.0552735	-0.175174
gRNA_2277	-0.147903	-0.595809
gRNA_2278	0.0548282	-0.269957
gRNA_2279	-0.172212	-0.848761
gRNA_2280	-0.411297	-1.0626
gRNA_2282	-0.0652187	-0.421018
gRNA_2283	-0.374968	-0.923753
gRNA_2286	0.185664	0.126202
gRNA_2288	0.27726	-0.116533
gRNA_2291	-0.407473	-0.725593
gRNA_2294	0.350537	0.33858
gRNA_2295	-0.29349	-1.06479
gRNA_2296	0.125239	-0.0287333
gRNA_2298	0.496848	0.847561
gRNA_2301	-0.0857689	-0.203198
gRNA_2305	-0.535415	-1.06778
gRNA_2308	0.359528	0.52502
gRNA_2309	-0.118031	-0.364851
gRNA_2312	-0.710549	-0.686279
gRNA_2314	-0.779431	-0.755158
gRNA_2315	-0.0862612	-0.575443
gRNA_2318	0.0785874	-0.28134
gRNA_2319	0.194052	-0.129949
gRNA_2321	-0.40417	-0.746203
gRNA_2322	-0.383201	-0.56134
gRNA_2323	0.0581393	-0.253178
gRNA_2325	-0.000741401	-0.22247
gRNA_2327	0.157312	0.0325086
gRNA_2328	-0.434286	-1.02751
gRNA_2329	-0.111744	-0.583941
gRNA_2331	-0.121309	-0.649177
gRNA_2336	0.455233	0.46805
gRNA_2337	-0.183401	-0.638657
gRNA_2342	-0.139893	-0.301791
gRNA_2344	0.295833	-0.13007
gRNA_2345	0.0884994	-0.330515
gRNA_2346	0.0574124	-0.0882445
gRNA_2347	-0.675219	-0.650948
gRNA_2350	0.0778464	-0.140803
gRNA_2355	-0.636759	-0.612487
gRNA_2357	0.466201	0.00279328
gRNA_2360	0.309558	0.485736
gRNA_2362	0.172533	0.0425873
gRNA_2363	0.22073	-0.11262
gRNA_2365	-0.327687	-1.29003
gRNA_2366	0.0475396	0.0423115
gRNA_2367	-0.276306	-0.724264
gRNA_2368	-0.254016	-0.72199
gRNA_2371	-0.00108055	-0.281762
gRNA_2374	0.15163	0.252138
gRNA_2375	0.783107	0.694752
gRNA_2376	-0.0240935	-0.0372088
gRNA_2377	0.197208	-0.246675
gRNA_2378	-0.130736	-0.258082
gRNA_2379	-0.789214	-1.081
gRNA_2380	-0.25638	-0.9337
gRNA_2381	-0.388689	-0.865624
gRNA_2385	0.0873519	-0.132106
gRNA_2387	-0.375676	-0.587666
gRNA_2392	-0.0211879	-0.296376
gRNA_2393	0.581389	0.510275
gRNA_2394	0.131515	0.50281
gRNA_2396	-0.290463	-0.67097
gRNA_2399	-0.0731968	-0.372152
gRNA_2401	-0.199098	-0.888711
gRNA_2402	0.247134	0.21114
gRNA_2404	-0.512292	-0.281194
gRNA_2405	0.144618	0.0198243
gRNA_2410	-0.0766626	-0.231138
gRNA_2411	0.297858	0.130193
gRNA_2412	-0.182968	-0.320936
gRNA_2413	-0.244522	-1.12436
gRNA_2414	-0.252127	-0.790053
gRNA_2415	0.92732	1.17238
gRNA_2418	0.331867	0.0396899
gRNA_2420	0.815841	0.59039
gRNA_2425	-0.0515769	-0.314306
gRNA_2427	-0.320339	-0.454266
gRNA_2431	-0.0930798	-0.570143
gRNA_2433	-0.295721	-0.905402
gRNA_2434	0.0942027	0.208913
gRNA_2436	0.532209	0.280944
gRNA_2437	-0.422118	-0.56134
gRNA_2438	0.38931	0.120835
gRNA_2439	-0.549365	-0.866866
gRNA_2440	0.216026	-0.265351
gRNA_2441	-0.649344	-1.2763
gRNA_2447	0.675317	0.209464
gRNA_2449	-0.807294	-1.45063
gRNA_2455	-0.612049	-0.865624
gRNA_2458	-0.337119	-0.839139
gRNA_2461	-0.0912389	-0.394198
gRNA_2466	-0.312675	-0.67043
gRNA_2467	-0.163372	-0.399108
gRNA_2468	-0.114334	-0.637233
gRNA_2469	0.0857476	-0.612362
gRNA_2470	-0.288483	-0.381064
gRNA_2472	-0.0227209	-0.494358
gRNA_2474	0.79347	0.270013
gRNA_2476	0.50334	0.377493
gRNA_2478	0.48237	0.391511
gRNA_2480	-0.0851783	-0.155112
gRNA_2481	0.291802	0.0329243
gRNA_2482	-0.191043	-1.11554
gRNA_2486	-0.15478	-0.814594
gRNA_2487	0.16278	0.0286215
gRNA_2488	-0.283818	-0.440898
gRNA_2489	0.581119	0.258066
gRNA_2490	0.422512	0.356175
gRNA_2491	0.393897	0.189191
gRNA_2493	-0.174259	0.0740067
gRNA_2494	0.938672	0.77512
gRNA_2498	0.0112454	-0.143256
gRNA_2500	0.0724174	0.0506325
gRNA_2502	-0.47539	-0.641979
gRNA_2503	0.0959442	-0.158045
gRNA_2505	0.386548	0.394511
gRNA_2506	0.109174	-0.210818
gRNA_2507	-0.333026	-0.667187
gRNA_2508	-0.2971	-0.70067
gRNA_2509	-0.422624	-1.38252
gRNA_2512	0.551614	0.217299
gRNA_2514	-0.41684	-1.33195
gRNA_2516	-0.271339	-0.78496
gRNA_2519	0.260964	0.0897513
gRNA_2524	0.443413	0.497621
gRNA_2525	0.374853	0.42485
gRNA_2526	0.341208	0.243777
gRNA_2530	0.2735	0.104991
gRNA_2531	0.196489	0.00805648
gRNA_2532	0.172618	-0.100391
gRNA_2533	-0.0316719	-0.265074
gRNA_2534	0.256387	-0.273218
gRNA_2537	0.234327	-0.0900329
gRNA_2538	-0.165696	-0.557324
gRNA_2540	-0.243476	-0.468716
gRNA_2545	-0.234269	-0.643522
gRNA_2546	0.201609	0.397707
gRNA_2547	-0.497178	-0.933173
gRNA_2548	0.0331261	-0.264798
gRNA_2553	-0.376671	-0.892935
gRNA_2555	0.254369	0.136864
gRNA_2556	-0.0430336	-0.397873
gRNA_2557	-0.225952	-0.751467
gRNA_2559	0.456919	0.361885
gRNA_2560	-0.023776	-0.358662
gRNA_2561	0.131361	-0.228806
gRNA_2562	0.33373	0.17711
gRNA_2565	-0.129428	-0.286869
gRNA_2567	-0.293284	-0.694409
gRNA_2569	0.167375	-0.164251
gRNA_2571	0.181743	-0.0576854
gRNA_2572	0.0889868	-0.084268
gRNA_2574	-0.223491	-0.670202
gRNA_2576	-0.062307	-0.380557
gRNA_2577	0.00188856	-0.363036
gRNA_2579	-0.240685	-0.340142
gRNA_2581	-0.0714869	-0.101453
gRNA_2582	-0.0430602	-0.489109
gRNA_2583	0.0179987	-0.255485
gRNA_2586	0.177591	0.130418
gRNA_2589	-0.208024	-0.77219
gRNA_2590	-0.168079	-0.659437
gRNA_2592	0.388777	0.610778
gRNA_2594	-0.111967	-0.197675
gRNA_2595	0.357614	0.73781
gRNA_2596	-0.257553	-0.435357
gRNA_2600	0.0998211	-0.134794
gRNA_2605	-0.675219	-0.229476
gRNA_2606	-0.0464559	-0.56134
gRNA_2607	0.457109	0.215281
gRNA_2608	0.193159	0.0639153
gRNA_2611	0.474145	-0.0941167
gRNA_2613	0.941236	0.988668
gRNA_2614	-0.549473	-0.77219
gRNA_2615	0.0382216	-0.252295
gRNA_2619	0.236108	-0.0375628
gRNA_2620	0.315692	0.0582839
gRNA_2621	-0.766332	-0.779974
gRNA_2623	0.211759	0.054078
gRNA_2625	-0.0865541	-0.525458
gRNA_2628	-0.0264936	-0.455732
gRNA_2631	-0.0834887	-0.242464
gRNA_2632	-0.0334657	-0.521076
gRNA_2633	1.34625	1.27336
gRNA_2634	-0.0762485	-0.381498
gRNA_2635	0.424626	0.39763
gRNA_2637	0.311776	0.172765
gRNA_2639	0.242134	0.139967
gRNA_2644	0.391146	0.417635
gRNA_2645	0.147257	-0.217643
gRNA_2649	0.361733	0.281975
gRNA_2650	-0.257043	-0.793909
gRNA_2651	-0.366498	-0.691169
gRNA_2653	-0.15332	-0.174183
gRNA_2659	-0.196813	-0.546415
gRNA_2664	0.511078	0.253916
gRNA_2665	0.163136	-0.0630339
gRNA_2666	-0.16979	-0.443235
gRNA_2667	-0.707627	-0.940795
gRNA_2669	-0.224501	-0.668143
gRNA_2671	-0.129588	-0.311659
gRNA_2672	-0.1382	-0.547556
gRNA_2674	-0.186466	-0.179157
gRNA_2675	-0.102398	-0.513901
gRNA_2677	-0.0513576	-0.218479
gRNA_2678	-0.0904286	-0.529143
gRNA_2680	-0.235602	-0.614121
gRNA_2686	-0.406396	-0.596102
gRNA_2689	-0.221955	-1.16619
gRNA_2690	0.0188778	-0.240568
gRNA_2693	-0.319875	-0.343396
gRNA_2696	0.323455	0.668773
gRNA_2697	0.566354	0.390628
gRNA_2698	0.180862	0.0328411
gRNA_2699	-0.210545	-1.06763
gRNA_2700	0.311606	0.749797
gRNA_2701	-0.124685	-0.707174
gRNA_2702	0.38491	0.0249164
gRNA_2703	-0.342925	-0.65825
gRNA_2705	0.694715	0.370755
gRNA_2706	-0.419918	-0.56134
gRNA_2707	0.437727	0.141766
gRNA_2711	0.401834	0.261111
gRNA_2715	0.092542	-0.210662
gRNA_2719	-0.180765	-0.440904
gRNA_2721	0.241404	0.110008
gRNA_2722	0.0588256	-0.243737
gRNA_2724	0.337695	0.00288976
gRNA_2727	0.0234944	0.300343
gRNA_2729	0.23006	0.0446517
gRNA_2730	0.486696	0.463888
gRNA_2731	0.439897	0.00881097
gRNA_2732	0.276319	-0.0181171
gRNA_2734	0.921475	0.964054
gRNA_2735	0.0650713	-0.411375
gRNA_2737	-0.523875	-1.09757
gRNA_2740	0.0636394	-0.30116
gRNA_2741	0.141264	0.222889
gRNA_2742	0.163491	-0.213591
gRNA_2743	0.0308903	-0.538912
gRNA_2745	-0.247404	-0.312065
gRNA_2750	0.279229	0.267524
gRNA_2751	0.478852	0.420637
gRNA_2752	0.321963	0.207699
gRNA_2754	-0.304221	-0.837021
gRNA_2755	0.138924	-0.0438216
gRNA_2757	-0.0906459	-0.358049
gRNA_2759	-0.156696	-0.304374
gRNA_2760	-0.39767	-1.32774
gRNA_2763	-0.0265425	-0.506197
gRNA_2766	0.299537	0.265573
gRNA_2767	-0.025398	-0.0496828
gRNA_2771	-0.0748848	-0.366891
gRNA_2772	0.0522646	-0.0111954
gRNA_2773	0.362625	0.0311843
gRNA_2775	-0.387931	-0.387323
gRNA_2776	-0.105644	-0.276173
gRNA_2778	0.0440348	-0.291439
gRNA_2782	-0.152843	-0.565497
gRNA_2783	-0.0123682	-0.563169
gRNA_2786	-0.0302424	-0.716786
gRNA_2787	-0.108214	-0.182373
gRNA_2788	-0.14085	-0.476683
gRNA_2795	0.191194	0.0560992
gRNA_2797	0.314404	0.233249
gRNA_2802	-0.237604	-0.550704
gRNA_2803	-0.366801	-0.665111
gRNA_2804	-0.036072	-0.286602
gRNA_2805	-0.635449	-1.08422
gRNA_2806	-0.475928	-0.905402
gRNA_2811	-0.124646	-0.488151
gRNA_2813	-0.0238467	-0.465398
gRNA_2818	-0.243682	-0.638545
gRNA_2819	0.479086	0.382641
gRNA_2820	0.0174801	-0.27731
gRNA_2821	0.144815	-0.523875
gRNA_2822	0.276287	0.218073
gRNA_2827	-0.178852	-0.284714
gRNA_2828	0.709607	0.539825
gRNA_2829	0.543276	0.389679
gRNA_2830	0.58138	0.147292
gRNA_2832	0.00409621	-0.549633
gRNA_2833	0.141528	0.0288169
gRNA_2837	-0.0408498	-0.324214
gRNA_2838	0.0329632	-0.201941
gRNA_2840	-0.886637	-0.862364
gRNA_2843	0.927674	0.712537
gRNA_2845	0.0731631	0.538954
gRNA_2847	-0.13133	-0.224678
gRNA_2849	0.0566429	-0.155594
gRNA_2850	0.116445	-0.067824
gRNA_2851	0.438975	0.110008
gRNA_2852	-0.21957	-0.469144
gRNA_2854	0.047632	-0.468926
gRNA_2856	0.140627	-0.0965761
gRNA_2860	-0.36035	-0.56134
gRNA_2861	0.11973	0.080725
gRNA_2862	0.363089	0.207458
gRNA_2863	0.140344	-0.258565
gRNA_2864	-0.194473	-0.319818
gRNA_2868	0.259905	0.127762
gRNA_2873	-0.274488	-0.583135
gRNA_2876	0.0953608	-0.378785
gRNA_2877	-0.0509963	-0.439507
gRNA_2878	0.449485	0.490337
gRNA_2879	-0.147952	-0.014933
gRNA_2880	0.423949	0.279578
gRNA_2882	-0.176385	-0.531158
gRNA_2883	0.495875	0.0795511
gRNA_2884	0.384598	0.218654
gRNA_2885	-0.0555823	-1.21455
gRNA_2886	-0.352753	-1.07373
gRNA_2887	-0.126413	-0.794054
gRNA_2889	0.16382	0.141497
gRNA_2890	-0.466029	-1.24379
gRNA_2892	0.246142	0.612479
gRNA_2893	-0.336415	-1.03543
gRNA_2895	0.133638	-0.218495
gRNA_2897	-0.0471311	-0.135488
gRNA_2898	-0.45068	-1.17455
gRNA_2900	-0.184553	-0.240281
gRNA_2904	-0.189574	-0.244204
gRNA_2908	0.223113	-0.156262
gRNA_2910	0.430092	0.20869
gRNA_2917	-0.58858	-0.888696
gRNA_2918	0.0993956	-0.133198
gRNA_2920	-0.278413	-0.226442
gRNA_2922	0.319113	0.301694
gRNA_2924	0.280405	-0.2392
gRNA_2926	-0.238843	-0.451784
gRNA_2928	-0.496103	-1.03543
gRNA_2932	-0.723907	-0.699638
gRNA_2938	0.422077	0.256041
gRNA_2940	0.0746606	-0.356326
gRNA_2942	-0.205247	-0.319151
gRNA_2945	-0.52281	-1.30005
gRNA_2948	1.24281	1.32073
gRNA_2950	0.225112	0.0810703
gRNA_2951	-0.298539	-1.10799
gRNA_2952	0.413871	0.281491
gRNA_2957	0.387653	0.190297
gRNA_2958	0.100506	-0.306124
gRNA_2961	0.136699	-0.273338
gRNA_2962	-0.198841	-0.61228
gRNA_2963	-0.127627	-0.301859
gRNA_2964	0.468201	0.0968808
gRNA_2969	0.55453	0.222004
gRNA_2971	0.161716	0.00371841
gRNA_2972	0.460453	0.144334
gRNA_2973	-0.858609	-0.834338
gRNA_2974	0.359629	0.81881
gRNA_2977	0.0926837	-0.352667
gRNA_2980	-0.232581	-0.645543
gRNA_2981	0.39807	0.434515
gRNA_2983	0.840598	1.12497
gRNA_2988	0.304141	-0.223765
gRNA_2989	0.105175	0.0141738
gRNA_2990	-0.055689	-0.600521
gRNA_2991	0.0575383	-0.129156
gRNA_2993	-0.2635	-0.737372
gRNA_2994	-0.083414	-0.339736
gRNA_2995	0.111826	-0.0368156
gRNA_2998	0.224323	-0.179599
gRNA_3000	0.33994	0.0525833
gRNA_3002	-0.212274	-0.00841621
gRNA_3003	0.461679	0.124912
gRNA_3009	-0.153219	-0.820064
gRNA_3012	0.100691	-0.193012
gRNA_3016	-0.0589967	0.468166
gRNA_3017	0.0416444	-0.415913
gRNA_3022	0.152213	-0.0733689
gRNA_3023	0.0883786	-0.42602
gRNA_3033	0.388135	0.258066
gRNA_3034	-0.0851805	-0.497421
gRNA_3037	-0.00923812	-0.409371
gRNA_3039	-0.2076	-1.02313
gRNA_3042	-0.328233	-0.736304
gRNA_3045	0.241761	0.140578
gRNA_3048	-0.119222	-0.33986
gRNA_3049	0.66121	0.649382
gRNA_3051	-0.0478762	-0.808869
gRNA_3055	-0.125331	-1.05618
gRNA_3057	0.0021485	-0.19103
gRNA_3058	-0.280054	-0.69019
gRNA_3060	0.042071	-0.317016
gRNA_3061	0.0482843	-0.530345
gRNA_3067	-0.00906352	-0.144025
gRNA_3068	-0.281171	-0.443253
gRNA_3069	-0.577131	-1.22448
gRNA_3070	-0.108249	-0.745317
gRNA_3072	-0.265927	-0.738259
gRNA_3073	0.182458	0.0798613
gRNA_3075	-0.189642	-0.42185
gRNA_3081	0.248555	0.301309
gRNA_3085	-0.142628	-0.563263
gRNA_3089	-0.6734	-1.57558
gRNA_3090	0.120292	-0.18487
gRNA_3091	-0.545534	-1.24182
gRNA_3094	-0.755623	-0.731355
gRNA_3095	0.139482	-0.219984
gRNA_3098	-0.371638	-0.56134
gRNA_3099	-0.0999512	-0.514093
gRNA_3100	0.100827	-0.25885
gRNA_3102	0.14789	0.314903
gRNA_3105	0.592771	0.759329
gRNA_3107	0.175153	0.0886121
gRNA_3109	0.575765	0.624556
gRNA_3110	-0.230263	-0.632714
gRNA_3112	-0.0794288	-0.581367
gRNA_3114	0.136877	-0.236969
gRNA_3116	-0.151102	-0.870457
gRNA_3119	-0.459928	-0.794645
gRNA_3122	0.00757106	-0.292683
gRNA_3124	0.387532	0.324855
gRNA_3126	0.601557	0.577943
gRNA_3127	0.652415	0.683617
gRNA_3130	0.717132	0.562542
gRNA_3131	-0.0175306	0.0463512
gRNA_3133	0.00753179	-0.314015
gRNA_3138	0.246003	0.0689071
gRNA_3139	-0.448422	-0.884416
gRNA_3142	0.271825	0.072342
gRNA_3143	-0.249777	-0.59735
gRNA_3146	-0.0462692	-0.327354
gRNA_3148	-0.081284	-0.61332
gRNA_3149	0.213377	0.113786
gRNA_3150	-0.435424	-0.878512
gRNA_3152	0.496623	0.309892
gRNA_3155	0.284608	-0.161221
gRNA_3156	0.450978	-0.0297227
gRNA_3157	-0.908689	-0.884416
gRNA_3160	0.270073	-0.343009
gRNA_3164	0.421667	0.367626
gRNA_3165	0.253109	0.289947
gRNA_3167	0.199339	0.129748
gRNA_3169	-0.00917793	-0.29706
gRNA_3171	0.170904	0.107116
gRNA_3172	0.254413	0.0932701
gRNA_3174	-0.224095	-0.569859
gRNA_3177	-0.263726	-0.361282
gRNA_3178	-0.773596	-0.749327
gRNA_3181	-0.204176	-0.33561
gRNA_3185	-0.136297	-0.517338
gRNA_3191	0.613122	0.41703
gRNA_3193	-0.188195	-0.569436
gRNA_3196	0.6657	0.635012
gRNA_3197	-0.0755659	-0.355707
gRNA_3198	-0.564691	-1.23372
gRNA_3202	0.758271	0.0437459
gRNA_3204	-0.784855	-1.16566
gRNA_3207	-0.477771	-0.880093
gRNA_3208	-0.0394272	-0.0884423
gRNA_3209	0.0904206	-0.0686371
gRNA_3213	0.470223	0.26112
gRNA_3214	0.396751	0.256154
gRNA_3216	-0.317943	-0.56134
gRNA_3217	-0.164045	-0.658388
gRNA_3219	0.245523	0.292731
gRNA_3220	-0.145148	-0.0775803
gRNA_3221	0.536693	0.347367
gRNA_3222	-0.126775	-0.486661
gRNA_3223	-0.123404	-0.279046
gRNA_3225	1.27381	0.94899
gRNA_3226	0.248859	-0.0211545
gRNA_3227	0.0351878	-0.310167
gRNA_3229	0.0357964	-0.603206
gRNA_3230	-0.0749052	-0.315262
gRNA_3233	0.166546	0.193644
gRNA_3234	-0.268591	-0.896143
gRNA_3238	0.176926	0.0766891
gRNA_3243	-0.177559	-0.531735
gRNA_3244	-0.333599	-0.528126
gRNA_3245	0.171739	0.14282
gRNA_3246	0.22272	-0.24012
gRNA_3247	-0.084151	-0.710417
gRNA_3248	0.072272	-0.125139
gRNA_3249	0.127791	-0.167979
gRNA_3251	-0.976249	-0.951978
gRNA_3252	0.305101	-0.136651
gRNA_3253	-0.93375	-0.909481
gRNA_3255	-0.206128	-0.668151
gRNA_3261	-0.262563	-0.791693
gRNA_3262	0.185428	-0.0344914
gRNA_3263	0.0243137	-0.164229
gRNA_3271	0.540489	0.456758
gRNA_3273	-0.0645435	-0.165934
gRNA_3276	0.384044	0.398994
gRNA_3278	0.249567	-0.0320025
gRNA_3281	0.311452	0.195639
gRNA_3285	0.116275	-0.150276
gRNA_3286	-0.304355	-0.470867
gRNA_3289	-0.17217	-0.90863
gRNA_3293	-0.0624637	-0.50669
gRNA_3294	0.16998	-0.00458719
gRNA_3295	0.591972	0.106266
gRNA_3296	-0.40735	-0.56134
gRNA_3298	0.315663	0.242783
gRNA_3300	-0.00966403	-1.36154
gRNA_3301	-0.10613	-0.767739
gRNA_3302	0.0818044	-0.763124
gRNA_3303	0.835783	0.870532
gRNA_3304	-0.322459	-1.00022
gRNA_3305	0.121905	-0.786646
gRNA_3306	-0.194577	-0.77219
gRNA_3312	0.269856	0.00459748
gRNA_3314	0.38204	0.675517
gRNA_3315	-0.696758	-0.672486
gRNA_3318	-0.329322	-1.17082
gRNA_3319	-0.175532	-0.934495
gRNA_3321	0.327264	-0.419617
gRNA_3322	-0.130449	-0.887995
gRNA_3323	-0.122245	-0.804371
gRNA_3324	0.237162	0.0587972
gRNA_3326	0.242943	0.159659
gRNA_3327	0.227759	0.194065
gRNA_3329	-0.119601	-0.331511
gRNA_3341	0.446695	0.560516
gRNA_3343	0.0153659	-0.33328
gRNA_3345	-0.478291	-0.915928
gRNA_3348	-0.160884	-1.04147
gRNA_3351	-0.447926	-0.627055
gRNA_3352	-0.77583	-1.11813
gRNA_3353	-0.89521	-0.909481
gRNA_3355	0.158436	-0.0593269
gRNA_3357	-0.294408	-1.02621
gRNA_3359	0.259669	0.112422
gRNA_3360	-0.0548841	-0.56487
gRNA_3361	0.038887	-0.104552
gRNA_3362	-0.335061	-0.727347
gRNA_3363	0.139939	0.0319607
gRNA_3364	0.130547	0.0536104
gRNA_3365	0.452582	0.352229
gRNA_3366	0.236229	-0.0475529
gRNA_3367	0.40267	0.152828
gRNA_3370	-0.180648	-0.521505
gRNA_3372	-0.146739	-0.385447
gRNA_3373	0.501198	0.353937
gRNA_3374	-0.644724	-0.620459
gRNA_3375	0.317477	0.153025
gRNA_3379	-0.14754	-0.436831
gRNA_3381	0.159174	-0.151497
gRNA_3382	0.0595099	-0.126522
gRNA_3384	0.164171	0.0783964
gRNA_3387	-0.19379	-0.541135
gRNA_3393	0.312885	-0.386766
gRNA_3396	-0.149799	-0.743416
gRNA_3404	0.0290679	-0.183007
gRNA_3405	-0.246029	-0.0538439
gRNA_3406	0.109558	-0.146514
gRNA_3407	0.210038	0.303315
gRNA_3408	0.267259	-0.0266996
gRNA_3410	-0.667798	-0.643522
gRNA_3411	-0.0496647	-0.247412
gRNA_3416	0.105532	-0.226747
gRNA_3417	0.348288	0.416023
gRNA_3419	0.826559	0.730815
gRNA_3421	0.0747887	-0.302001
gRNA_3422	-0.0815571	-0.717285
gRNA_3428	0.312294	0.114942
gRNA_3429	0.213112	0.194873
gRNA_3430	0.128617	0.120492
gRNA_3432	0.394413	0.248142
gRNA_3435	0.0121711	-0.243705
gRNA_3437	0.483621	0.359528
gRNA_3438	0.0404087	-0.0523762
gRNA_3439	-0.191258	-0.700027
gRNA_3441	-0.489094	-0.744938
gRNA_3442	0.125938	0.17153
gRNA_3444	-0.0132588	-0.434987
gRNA_3446	-0.0138112	-0.274514
gRNA_3449	0.135888	-0.217667
gRNA_3455	-0.0215427	-0.232747
gRNA_3456	0.0714033	-0.263443
gRNA_3457	0.325872	0.00897835
gRNA_3459	0.265246	0.131489
gRNA_3460	-0.0290933	-0.461838
gRNA_3464	0.112224	-0.0642884
gRNA_3465	-0.594558	-0.570286
gRNA_3471	-0.192859	-0.580625
gRNA_3472	0.472172	0.458382
gRNA_3473	0.367053	0.256313
gRNA_3474	-0.157539	0.0851954
gRNA_3475	0.0569781	-0.564861
gRNA_3477	-0.846018	-1.50126
gRNA_3478	0.786463	0.721771
gRNA_3482	-0.567404	-1.32257
gRNA_3486	0.379537	0.236455
gRNA_3491	0.820986	0.257945
gRNA_3492	-0.322869	-0.886116
gRNA_3495	-0.0686542	-0.668138
gRNA_3499	-0.240056	-0.747827
gRNA_3500	-0.201251	-0.96918
gRNA_3501	-0.209772	-0.487927
gRNA_3503	0.280369	0.0798936
gRNA_3504	0.276723	0.0559767
gRNA_3505	0.0481307	-0.397895
gRNA_3507	-0.349922	-0.585471
gRNA_3508	0.291344	0.421707
gRNA_3509	-0.529799	-0.959275
gRNA_3511	-0.000270722	-0.275341
gRNA_3512	0.00838548	-0.153857
gRNA_3514	-0.56235	-1.16791
gRNA_3516	0.501436	0.635944
gRNA_3517	-0.19105	-0.875268
gRNA_3519	-0.137431	-0.194146
gRNA_3520	0.334197	0.0940674
gRNA_3521	0.388892	0.152939
gRNA_3523	0.275285	-0.250617
gRNA_3524	0.0230543	-0.396964
gRNA_3527	0.144764	0.234425
gRNA_3529	-0.0702162	-0.521443
gRNA_3530	-0.471559	-1.28986
gRNA_3533	-0.374187	-0.843226
gRNA_3534	-0.618624	-1.38389
gRNA_3536	-0.550583	-1.14727
gRNA_3537	-0.127169	-0.909122
gRNA_3538	-0.736874	-0.712608
gRNA_3539	-0.229481	-0.945491
gRNA_3541	-0.122025	-0.611524
gRNA_3542	0.465902	0.442911
gRNA_3543	0.276962	0.152596
gRNA_3545	0.677369	0.901434
gRNA_3546	-0.101854	-0.328477
gRNA_3549	0.156615	-0.0284996
gRNA_3550	-0.243561	-0.937415
gRNA_3552	-0.0419473	-0.0931349
gRNA_3554	0.18662	-0.58165
gRNA_3556	-0.838803	-1.18113
gRNA_3557	-0.724694	-0.997365
gRNA_3558	-0.428318	-1.13257
gRNA_3559	-0.254099	-0.546024
gRNA_3561	0.112412	-0.140691
gRNA_3563	0.273407	0.0769851
gRNA_3564	-0.0826953	-0.588366
gRNA_3566	0.285679	0.09938
gRNA_3568	1.87114	1.94711
gRNA_3571	0.378038	0.147613
gRNA_3574	0.209004	0.335693
gRNA_3577	0.624059	0.488929
gRNA_3578	0.147928	0.0197609
gRNA_3579	0.267719	-0.0124267
gRNA_3581	0.333425	0.248823
gRNA_3583	-0.103082	-0.739656
gRNA_3584	-0.220024	-0.0584053
gRNA_3586	0.211497	0.146977
gRNA_3588	-0.0856149	-0.287412
gRNA_3589	-0.882092	-0.857821
gRNA_3590	0.0989916	-0.0660858
gRNA_3591	0.215661	-0.265652
gRNA_3593	-0.198288	-0.426026
gRNA_3594	-0.171685	-0.473562
gRNA_3596	-0.411501	-0.612487
gRNA_3597	0.94934	0.72303
gRNA_3598	0.0153767	-0.36885
gRNA_3604	0.641731	0.548879
gRNA_3605	-0.183145	-0.642361
gRNA_3607	0.404811	0.224437
gRNA_3610	0.381444	0.100648
gRNA_3612	-0.706139	-0.774604
gRNA_3613	0.114959	-0.426331
gRNA_3614	0.0193235	-0.0767139
gRNA_3619	-0.326485	-0.749327
gRNA_3620	0.170744	-0.104586
gRNA_3621	-0.0263252	-0.611046
gRNA_3623	0.317737	0.33488
gRNA_3625	-0.652556	-0.628287
gRNA_3626	-0.763284	-1.2763
gRNA_3627	-0.790855	-0.766584
gRNA_3628	-0.761759	-1.14255
gRNA_3630	-0.406667	-1.71957
gRNA_3631	-0.00877459	-0.737286
gRNA_3632	0.0228913	-0.501765
gRNA_3634	-0.31195	-0.769016
gRNA_3636	-0.585607	0.0520155
gRNA_3637	0.0799249	-0.335504
gRNA_3639	-0.102806	-0.476147
gRNA_3640	0.542451	0.43393
gRNA_3643	0.601021	0.65354
gRNA_3650	0.176838	-0.0351417
gRNA_3651	0.761559	0.554811
gRNA_3655	-0.569114	-1.19607
gRNA_3656	-0.693406	-1.08149
gRNA_3667	-0.255328	-0.605063
gRNA_3672	-0.55823	-0.875732
gRNA_3674	0.1875	0.0655724
gRNA_3676	-0.981385	-1.33949
gRNA_3678	-0.419307	-0.489649
gRNA_3680	-0.697396	-1.24182
gRNA_3688	0.360977	0.363985
gRNA_3689	0.316172	0.449842
gRNA_3690	-0.131605	-0.786646
gRNA_3691	0.142614	0.0921084
gRNA_3694	-0.759531	-0.601192
gRNA_3695	-0.191517	-0.694628
gRNA_3697	0.231213	-0.0862828
gRNA_3700	-0.221802	-0.157303
gRNA_3701	-0.332048	-0.49708
gRNA_3702	-0.144723	0.0016592
gRNA_3703	0.141236	-0.36317
gRNA_3704	-0.0972788	-0.0622492
gRNA_3706	0.161486	-0.145666
gRNA_3707	-0.276793	-0.880093
gRNA_3710	0.147185	0.527536
gRNA_3711	-0.675219	-0.650948
gRNA_3712	-0.76769	-0.743416
gRNA_3714	0.00316047	-0.0983337
gRNA_3715	-0.0425534	-0.604589
gRNA_3717	0.725524	0.55593
gRNA_3718	0.155062	-0.422296
gRNA_3719	-0.201267	-0.875254
gRNA_3720	0.509164	0.0693902
gRNA_3722	1.25752	1.35727
gRNA_3726	0.433873	0.473491
gRNA_3728	0.219666	-0.0969426
gRNA_3729	-0.270162	-0.56134
gRNA_3732	-0.192526	-0.821049
gRNA_3733	0.263591	0.206913
gRNA_3735	-0.477465	-1.01682
gRNA_3738	-0.83815	-1.17234
gRNA_3740	-0.224329	-0.325171
gRNA_3742	0.657058	0.604853
gRNA_3744	-0.128355	-0.322148
gRNA_3747	-0.437634	-0.915339
gRNA_3750	0.47312	0.142232
gRNA_3751	0.0217125	-0.12653
gRNA_3752	-0.119437	-0.537196
gRNA_3754	-0.131423	-0.43721
gRNA_3755	0.338845	0.267257
gRNA_3759	0.41637	0.20847
gRNA_3761	-0.200106	-0.468976
gRNA_3763	0.107669	-0.232142
gRNA_3766	0.0224368	-0.0608748
gRNA_3767	-0.307928	-0.296748
gRNA_3770	-0.187977	-0.614745
gRNA_3772	0.498639	0.62004
gRNA_3774	-0.288614	-0.628703
gRNA_3775	0.218556	-0.373683
gRNA_3781	-0.848848	-0.824575
gRNA_3782	0.0446577	-0.00642574
gRNA_3783	0.128606	-0.168101
gRNA_3785	-0.197297	-0.788535
gRNA_3786	0.144512	0.00855488
gRNA_3788	0.0283366	0.0226333
gRNA_3789	0.0377817	-0.171705
gRNA_3790	0.387392	-0.123056
gRNA_3792	-0.339829	-0.823517
gRNA_3796	0.284621	0.0887015
gRNA_3799	0.263977	0.133739
gRNA_3801	-0.00298726	-0.0334137
gRNA_3803	0.121705	0.481224
gRNA_3806	-0.113103	-0.20425
gRNA_3808	-0.749466	-0.725193
gRNA_3810	-0.45401	-1.23421
gRNA_3813	-0.247309	-0.749327
gRNA_3816	0.634381	0.347323
gRNA_3817	-0.300243	-0.782213
gRNA_3818	-0.253388	-0.203134
gRNA_3819	0.254784	-0.344108
gRNA_3822	-0.583231	-0.934965
gRNA_3823	0.108621	-0.312908
gRNA_3824	0.42783	0.429122
gRNA_3825	-0.485017	-0.502775
gRNA_3826	0.069939	-0.257973
gRNA_3830	-0.0415754	-1.08422
gRNA_3832	0.037551	-0.544443
gRNA_3833	0.383965	0.322549
gRNA_3835	-0.0134563	-0.56134
gRNA_3836	-0.233103	-0.35649
gRNA_3837	-0.086561	-0.470083
gRNA_3842	0.00469796	0.202027
gRNA_3846	-0.00823478	-0.25223
gRNA_3848	-0.330387	-0.25964
gRNA_3849	-0.409529	-0.587666
gRNA_3850	-0.0184005	-0.290196
gRNA_3855	-0.00338333	0.208784
gRNA_3856	0.0522748	0.07737
gRNA_3857	0.119092	-0.112354
gRNA_3859	-0.0899129	-0.449765
gRNA_3860	-0.00782995	-0.270888
gRNA_3862	-0.310378	-0.780519
gRNA_3864	0.0579274	-0.603716
gRNA_3865	-0.0536832	-0.546423
gRNA_3867	-0.574736	-1.57029
gRNA_3868	-0.00828859	-0.682961
gRNA_3869	0.314017	0.265888
gRNA_3870	0.512789	0.363841
gRNA_3871	0.426955	0.341874
gRNA_3872	-0.241277	-0.800151
gRNA_3873	-0.167348	-0.474663
gRNA_3874	-0.736874	-0.712608
gRNA_3880	0.282939	0.155998
gRNA_3881	0.0857796	0.0121386
gRNA_3882	-0.232329	-0.721065
gRNA_3883	-0.207422	-0.530684
gRNA_3885	-0.365007	-0.970573
gRNA_3886	-0.304635	-0.498328
gRNA_3887	-0.730443	-0.706171
gRNA_3889	-0.723907	-0.699638
gRNA_3894	-0.49151	-0.742655
gRNA_3896	0.123751	-0.213951
gRNA_3898	0.654792	0.750986
gRNA_3900	-0.628529	-1.10835
gRNA_3901	-0.276421	-0.834338
gRNA_3902	0.200689	0.109769
gRNA_3903	-0.0341438	-0.391311
gRNA_3904	-0.0391091	-0.416157
gRNA_3907	-0.219469	-0.276445
gRNA_3909	-0.282657	-0.736821
gRNA_3911	0.196381	-0.468381
gRNA_3914	0.0499327	-0.239244
gRNA_3916	0.349142	0.114293
gRNA_3917	0.368667	0.247934
gRNA_3921	-0.114743	-0.348319
gRNA_3923	-0.395108	-0.56134
gRNA_3925	-0.423393	-0.492064
gRNA_3929	-0.838862	-0.814594
gRNA_3930	-0.300686	-0.593163
gRNA_3934	-0.228872	-1.12408
gRNA_3935	-0.284338	-0.533134
gRNA_3936	-0.0240821	-0.372304
gRNA_3939	-0.19475	-0.643522
gRNA_3940	-0.0604664	-0.390734
gRNA_3941	-0.15484	-0.512829
gRNA_3942	0.525645	0.291144
gRNA_3943	0.139895	-0.211807
gRNA_3947	-0.00301604	-0.381503
gRNA_3949	0.136926	0.0806489
gRNA_3953	0.589986	0.501024
gRNA_3956	-0.181249	-1.14492
gRNA_3957	0.276536	0.0159562
gRNA_3958	-0.410719	-1.11813
gRNA_3959	-0.243187	-0.225783
gRNA_3961	-0.0559817	-0.90886
gRNA_3962	-0.0953371	-1.06194
gRNA_3963	0.410382	0.298073
gRNA_3964	-0.124293	-1.22074
gRNA_3965	-0.812853	-0.788578
gRNA_3969	-0.264582	-0.486805
gRNA_3971	-0.340596	-1.35866
gRNA_3972	0.0355299	-0.460043
gRNA_3974	0.476697	0.302412
gRNA_3978	0.0252612	-0.10663
gRNA_3979	-0.181312	-0.620606
gRNA_3980	-0.511215	-1.49375
gRNA_3982	0.509138	0.519179
gRNA_3984	0.877346	0.695939
gRNA_3990	0.0392322	-0.29137
gRNA_3991	-0.21527	-0.766421
gRNA_3994	-0.0168441	-0.339792
gRNA_3998	-0.198703	-0.743416
gRNA_4000	0.317875	0.372626
gRNA_4002	-0.26553	-0.739697
gRNA_4003	-0.41628	-1.47433
gRNA_4007	0.648316	0.167295
gRNA_4010	0.248899	-0.00997285
gRNA_4011	0.135876	-0.215677
gRNA_4012	-0.234551	-0.429594
gRNA_4014	0.249076	-0.0102828
gRNA_4018	-0.016741	-0.478313
gRNA_4022	0.301136	-0.552236
gRNA_4024	0.370223	0.328497
gRNA_4025	-0.452996	-0.844224
gRNA_4031	0.0321639	-0.13921
gRNA_4034	-0.447516	-1.17527
gRNA_4036	0.0998769	-0.119676
gRNA_4039	-0.0155661	-0.936416
gRNA_4040	-0.0605225	-0.31597
gRNA_4041	0.144934	-0.0702582
gRNA_4042	-0.929674	-0.905402
gRNA_4043	-0.23422	-0.672512
gRNA_4047	-0.0477414	-0.493531
gRNA_4049	-0.00833589	-0.422415
gRNA_4051	0.699437	0.614043
[truncated: 43,223 more rows]

## Sheet: log10(negative scores) of genes
gene_id	Rep1	Rep2
BMgn000002	0.0481284	0.0662395
BMgn000003	0.316944	0.498475
BMgn000004	0.370641	0.353243
BMgn000005	0.369003	1.44744
BMgn000006	0.221046	0.0151937
BMgn000007	0.279849	0.670806
BMgn000008	0.105778	0.394156
BMgn000009	0.205547	0.257872
BMgn000010	0.126337	0.332183
BMgn000011	0.062031	0.0365191
BMgn000012	0.0548467	0.162323
BMgn000013	0.138203	0.153218
BMgn000014	0.3622	0.407069
BMgn000016	0.0622465	0.146515
BMgn000017	0.180548	0.0277231
BMgn000018	0.0655622	0.0310363
BMgn000019	0.977943	0.770984
BMgn000020	1.20302	0.653139
BMgn000022	0.54578	0.464655
BMgn000025	0.834578	0.601904
BMgn000026	0.588582	1.10471
BMgn000027	0.0768078	0.275732
BMgn000028	0.730534	0.571509
BMgn000029	0.0949709	0.360155
BMgn000030	0.797539	0.628083
BMgn000031	0.135347	0.0576397
BMgn000032	0.424616	0.260879
BMgn000033	0.0323631	0.0853766
BMgn000034	0.889478	0.527331
BMgn000035	1.21448	0.656237
BMgn000038	0.496536	0.181154
BMgn000039	0.106177	0.498366
BMgn000040	0.418574	0.597842
BMgn000041	0.163391	0.377921
BMgn000042	0.199414	0.872377
BMgn000043	0.258329	0.221733
BMgn000044	0.934906	0.320699
BMgn000045	0.392395	0.142601
BMgn000046	0.0683286	0.0633405
BMgn000047	1.27411	1.24374
BMgn000048	0.797648	0.901806
BMgn000049	0.690689	0.501317
BMgn000050	0.41788	0.246409
BMgn000051	0.298942	0.388595
BMgn000052	1.73532	1.29881
BMgn000053	0.00842397	0.00239521
BMgn000054	0.981258	0.476566
BMgn000055	0.238606	0.116066
BMgn000056	0.538937	0.590879
BMgn000057	0.10921	0.0442497
BMgn000058	0.0199921	0.00153577
BMgn000059	0.0580763	0.385029
BMgn000060	0.982091	0.936967
BMgn000061	0.515458	0.312088
BMgn000062	1.08695	0.574971
BMgn000063	0.351143	0.183275
BMgn000064	0.669302	0.414788
BMgn000065	0.0718705	0.0497277
BMgn000066	1.17845	0.92963
BMgn000067	0.452139	0.266434
BMgn000068	0.42714	0.839652
BMgn000069	1.28934	0.916928
BMgn000070	0.0561841	0.0640949
BMgn000071	0.139261	0.397332
BMgn000072	1.00815	1.11602
BMgn000073	0.431716	0.841276
BMgn000074	3.12189	2.79896
BMgn000075	0.0185438	0.156792
BMgn000076	0.283246	0.530252
BMgn000077	0.631025	0.231044
BMgn000078	0.583892	0.755995
BMgn000079	0.0386454	0.0329109
BMgn000080	0.0652188	0.0957444
BMgn000081	0.0742291	0.0723884
BMgn000083	0.259811	0.615754
BMgn000084	1.24291	0.852509
BMgn000085	1.19888	1.24982
BMgn000086	0.0997749	0.379624
BMgn000087	0.199984	0.0799967
BMgn000088	1.02518	1.28031
BMgn000089	0.0662951	0.054428
BMgn000090	1.05425	0.765432
BMgn000091	0.187929	0.0940854
BMgn000092	0.95707	0.462924
BMgn000093	0.228192	0.448428
BMgn000095	0.0362122	0.0651432
BMgn000098	0.0966821	0.0431355
BMgn000099	0.381429	0.152255
BMgn000100	0.924599	1.05375
BMgn000102	1.03008	2.39383
BMgn000103	1.57461	1.22537
BMgn000104	0.690881	0.578742
BMgn000105	0.519648	0.658664
BMgn000106	0.414066	0.908966
BMgn000107	1.33583	1.74333
BMgn000108	0.244095	0.570668
BMgn000109	0.114837	0.0778768
BMgn000110	1.47295	1.11317
BMgn000111	0.278816	0.715254
BMgn000113	0.753231	0.623989
BMgn000114	0.257904	0.827047
BMgn000115	0.984766	1.26486
BMgn000116	0.827514	0.0728658
BMgn000117	0.510182	0.312614
BMgn000118	0.00638303	0.0169288
BMgn000119	0.841487	0.802416
BMgn000120	1.58094	2.63038
BMgn000121	0.249669	0.903194
BMgn000122	0.679023	0.210539
BMgn000123	0.329309	1.06018
BMgn000124	0.420308	0.209877
BMgn000125	1.25693	0.337072
BMgn000126	0.539899	0.514208
BMgn000127	0.910236	0.576197
BMgn000128	1.04396	0.96425
BMgn000129	0.449698	1.69073
BMgn000130	0.757906	0.380907
BMgn000131	0.0720704	0.0212718
BMgn000132	0.740406	1.15148
BMgn000133	0.442216	0.347183
BMgn000134	0.230697	0.606671
BMgn000138	0.0800594	0.0387736
BMgn000139	0.00444816	0.0568519
BMgn000140	2.82877	0.960864
BMgn000141	0.124846	0.352676
BMgn000144	0.297819	0.0747292
BMgn000145	0.650567	1.12053
BMgn000147	0.219985	0.641171
BMgn000148	0.169219	0.214976
BMgn000149	0.895069	1.50441
BMgn000150	0.0868699	0.183037
BMgn000151	0.183229	0.432821
BMgn000153	0.63831	0.2073
BMgn000154	2.75012	1.34915
BMgn000155	0.10863	1.29763
BMgn000156	0.61649	0.570102
BMgn000157	0.100913	0.180226
BMgn000160	0.0126734	0.0177197
BMgn000161	0.825591	0.143688
BMgn000162	0.656414	0.371151
BMgn000163	0.261973	0.240642
BMgn000164	0.00239521	0.00179299
BMgn000165	0.168258	0.0411448
BMgn000166	0.0608903	0.0265996
BMgn000167	0.294273	0.126435
BMgn000168	0.0675415	0.0317927
BMgn000170	0.4552	2.03477
BMgn000171	0.176617	0.59363
BMgn000172	0.385852	0.361611
BMgn000173	0.448074	0.163144
BMgn000174	1.86195	0.328818
BMgn000175	0.199187	1.39798
BMgn000177	2.28638	3.4516
BMgn000178	0.61318	0.977695
BMgn000179	1.0553	0.727532
BMgn000180	0.99332	1.6414
BMgn000181	0.37819	0.104191
BMgn000182	0.111736	0.227935
BMgn000183	0.539448	0.0742446
BMgn000184	0.360533	0.729974
BMgn000185	0.104467	0.422187
BMgn000186	0.496223	0.658328
BMgn000188	1.52603	2.15353
BMgn000189	0.0296857	0.0133716
BMgn000190	0.590185	0.145111
BMgn000191	0.302082	0.373814
BMgn000192	0.976172	0.936179
BMgn000193	0.475721	0.522098
BMgn000194	0.715772	0.851737
BMgn000195	0.024063	0.0232512
BMgn000196	0.0182584	0.0425747
BMgn000197	0.448855	0.850842
BMgn000198	0.205373	0.206349
BMgn000199	0.537797	0.476566
BMgn000201	1.8494	1.90682
BMgn000202	1.20054	0.629728
BMgn000203	0.702218	0.22514
BMgn000204	2.27522	3.81793
BMgn000206	0.0945765	0.0409109
BMgn000207	0.982674	1.39733
BMgn000208	0.455275	0.365482
BMgn000209	0.867228	0.267904
BMgn000210	0.029351	0.179779
BMgn000211	0.29034	0.440237
BMgn000212	0.604569	0.219236
BMgn000213	0.385831	0.104185
BMgn000214	0.0127316	0.0744765
BMgn000215	0.442625	0.243996
BMgn000216	0.463227	0.330469
BMgn000217	0.414021	0.438445
BMgn000218	0.612379	0.620948
BMgn000219	1.46371	0.482105
BMgn000222	0.608783	1.07625
BMgn000223	1.13023	1.54803
BMgn000224	0.191047	0.788559
BMgn000225	0.577459	0.799396
BMgn000226	0.02795	0.0528507
BMgn000227	0.308282	0.241944
BMgn000228	1.17004	1.78415
BMgn000229	0.551093	0.0259353
BMgn000231	0.509761	0.927015
BMgn000232	0.0800542	0.0785008
BMgn000233	0.113261	0.222464
BMgn000234	0.389936	0.681227
BMgn000236	0.673152	0.852231
BMgn000237	0.000899921	0.0130537
BMgn000240	0.51893	0.449368
BMgn000241	1.18692	0.516698
BMgn000242	0.0280519	0.0933579
BMgn000243	0.169463	0.274456
BMgn000244	0.297345	0.384018
BMgn000245	0.0120881	0.0410111
BMgn000246	0.0135642	0.188861
BMgn000247	1.46572	1.11434
BMgn000248	0.182018	1.49689
BMgn000249	0.939831	1.88914
BMgn000250	0.726651	1.31422
BMgn000251	0.124123	0.662481
BMgn000252	0.696653	0.995679
BMgn000253	2.0031	1.9514
BMgn000254	0.953076	1.17646
BMgn000255	0.0363538	0.0561396
BMgn000256	0.418301	0.688776
BMgn000257	0.101171	0.0745435
BMgn000258	0.466482	0.621348
BMgn000259	0.675985	0.781307
BMgn000260	0.930073	0.17648
BMgn000261	0.145518	0.367654
BMgn000262	0.853686	1.14945
BMgn000263	0.725565	0.440764
BMgn000264	0.274374	0.464795
BMgn000266	0.260151	0.228633
BMgn000267	0.00449204	0.0910595
BMgn000268	1.49115	0.471392
BMgn000269	0.235077	0.686597
BMgn000270	0.0783499	0.00351898
BMgn000271	0.381617	0.281664
BMgn000272	1.95234	1.71019
BMgn000273	0.0840675	0.224186
BMgn000274	0.318433	0.0997421
BMgn000275	1.01546	0.631267
BMgn000276	0.0320825	0.00184969
BMgn000277	0.549628	0.144778
BMgn000278	0.00239521	0.0449283
BMgn000279	0.623697	1.21422
BMgn000280	0.0876929	0.0676379
BMgn000281	0.851181	1.28143
BMgn000282	0.135513	0.0468301
BMgn000283	0.710099	0.731843
BMgn000284	0.124192	0.0295137
BMgn000285	1.02445	0.726328
BMgn000286	0.17725	0.0982911
BMgn000287	0.679148	0.890253
BMgn000288	0.277654	0.209856
BMgn000290	0.601678	0.367654
BMgn000291	0.257951	0.0915579
BMgn000292	1.48724	2.05541
BMgn000293	0.66374	0.976953
BMgn000294	0.104312	0.218115
BMgn000295	0.953817	0.670806
BMgn000296	0.00711084	0.0240216
BMgn000297	1.06545	0.728553
BMgn000300	0.958647	1.23422
BMgn000301	0.413165	0.388595
BMgn000302	0.501662	0.498831
BMgn000303	0.545155	0.769602
BMgn000305	0.0369161	0.0687151
BMgn000306	0.831503	0.525653
BMgn000307	0.0204698	0.0666595
BMgn000308	1.51496	1.19054
BMgn000309	0.185087	0.216518
BMgn000311	1.00207	1.5657
BMgn000312	0.674608	0.179254
BMgn000313	0.648958	0.44687
BMgn000314	0.0126958	0.00539693
BMgn000315	0.103584	0.22479
BMgn000317	0.142927	0.0347512
BMgn000318	0.307435	0.385725
BMgn000319	0.271054	0.340864
BMgn000320	0.0213174	0.0297043
BMgn000321	0.0119407	0.111405
BMgn000322	0.767665	0.669607
BMgn000323	2.33554	1.6734
BMgn000324	0.90198	0.509143
BMgn000325	0.0934603	0.136951
BMgn000326	1.05796	0.657874
BMgn000327	0.0684659	0.441267
BMgn000328	0.12358	0.0666494
BMgn000329	0.0160717	0.0047598
BMgn000330	0.654332	1.18955
BMgn000331	0.096834	0.215304
BMgn000332	0.0149554	0.0907222
BMgn000333	0.428664	0.641228
BMgn000334	0.388553	0.448696
BMgn000335	0.195704	0.169482
BMgn000336	0.0771033	0.104688
BMgn000337	1.17306	1.64165
BMgn000338	0.255762	0.245331
BMgn000339	1.00947	0.545994
BMgn000340	0.0393247	0.0203697
BMgn000341	0.564984	0.649016
BMgn000342	0.246241	0.859995
BMgn000343	0.403931	0.979597
BMgn000344	0.230254	0.0634712
BMgn000345	0.323023	0.244934
BMgn000346	0.125107	0.0791726
BMgn000347	1.11175	0.531638
BMgn000348	2.38173	1.66623
BMgn000349	0.0371621	0.353351
BMgn000350	0.00312511	0.00195874
BMgn000351	0.098253	0.192005
BMgn000352	0.170375	0.0496011
BMgn000353	0.913	0.601991
BMgn000354	0.121731	0.102824
BMgn000355	1.67675	1.4892
BMgn000357	1.32132	0.248867
BMgn000358	1.24226	1.3914
BMgn000359	1.56462	1.14883
BMgn000360	1.81559	1.59348
BMgn000361	0.291562	0.199737
BMgn000362	3.09908	0.869666
BMgn000363	1.18019	1.71908
BMgn000364	0.758055	0.553013
BMgn000365	0.733651	1.87703
BMgn000366	0.374245	0.401417
BMgn000367	1.3197	1.26525
BMgn000368	1.15399	2.08912
BMgn000369	0.609701	1.57017
BMgn000370	0.144245	0.032864
BMgn000371	0.100639	0.044649
BMgn000373	0.883791	1.0825
BMgn000374	0.0352314	0.0242925
BMgn000375	0.968147	2.01516
BMgn000376	0.00552447	0.0347183
BMgn000377	0.180094	0.418198
BMgn000378	0.566662	0.407879
BMgn000380	0.40403	0.198425
BMgn000381	0.810341	0.64522
BMgn000383	0.777076	0.501579
BMgn000384	0.28593	0.104649
BMgn000385	0.67865	0.319411
BMgn000386	0.208534	0.057258
BMgn000388	0.109618	0.601331
BMgn000389	1.57083	1.06537
BMgn000390	0.136731	0.0620059
BMgn000391	0.0311996	0.0610802
BMgn000392	0.370611	0.197035
BMgn000393	0.702021	0.71231
BMgn000394	1.85755	2.23019
BMgn000396	0.424593	0.327025
BMgn000398	0.509508	0.222363
BMgn000399	2.7694	2.23383
BMgn000400	0.122946	0.214485
BMgn000401	0.729857	0.799834
BMgn000402	0.0275426	0.176454
BMgn000403	0.547983	0.468534
BMgn000406	0.145475	0.302849
BMgn000407	1.21088	0.954481
BMgn000408	0.930665	0.602251
BMgn000409	0.714015	1.00601
BMgn000411	0.913391	0.0854347
BMgn000412	2.74287	1.68582
BMgn000413	0.607672	1.01019
BMgn000414	0.326878	0.302535
BMgn000415	0.664201	0.240453
BMgn000416	0.155057	0.360115
BMgn000417	1.10797	0.813863
BMgn000418	0.65492	0.312418
BMgn000419	0.100382	0.0992616
BMgn000420	0.146929	0.00860999
BMgn000421	0.064251	0.271922
BMgn000422	0.870987	0.713095
BMgn000423	0.100749	0.0100921
BMgn000424	0.374163	0.554801
BMgn000425	0.557473	0.338197
BMgn000426	0.455944	0.544379
BMgn000427	0.289823	0.115205
BMgn000428	0.771497	0.632532
BMgn000429	0.526586	0.864041
BMgn000431	0.121846	0.142661
BMgn000432	0.0280519	0.0235079
BMgn000433	0.202511	0.391549
BMgn000434	0.0863504	0.450249
BMgn000435	1.10142	0.847375
BMgn000436	0.0270431	0.188077
BMgn000437	0.531667	0.351855
BMgn000438	0.928302	1.84197
BMgn000439	0.900699	1.34832
BMgn000440	0.619246	0.537617
BMgn000441	0.162911	0.0751988
BMgn000443	0.184675	0.6256
BMgn000444	0.598427	0.0285293
BMgn000445	1.10125	1.69743
BMgn000446	0.907385	0.643152
BMgn000447	0.937644	0.651812
BMgn000449	0.010141	0.017254
BMgn000450	0.266442	0.0141919
BMgn000451	1.10531	0.115273
BMgn000453	0.599721	0.962096
BMgn000454	1.15924	1.19855
BMgn000455	0.511294	0.342782
BMgn000456	0.69702	0.823214
BMgn000457	1.09929	0.634755
BMgn000458	0.208541	0.432292
BMgn000460	0.212703	0.344871
BMgn000461	0.32513	0.503444
BMgn000462	0.475072	0.570102
BMgn000463	1.91952	0.688543
BMgn000464	0.909707	1.69938
BMgn000465	0.695445	0.736364
BMgn000466	0.00795486	0.0198693
BMgn000467	1.00424	0.651461
BMgn000468	0.100798	0.173303
BMgn000469	0.464162	0.450249
BMgn000470	0.0780587	0.151485
BMgn000471	0.427756	0.395666
BMgn000472	0.523647	1.50439
BMgn000473	1.28226	2.11686
BMgn000474	0.770344	0.360902
BMgn000475	0.0130492	0.0262027
BMgn000476	0.234175	0.102708
BMgn000477	0.417607	0.333351
BMgn000478	0.142716	0.343107
BMgn000479	0.245338	0.542148
BMgn000480	0.328633	0.405298
BMgn000481	1.56693	1.21396
BMgn000482	0.0340555	0.00174066
BMgn000483	2.49425	2.28933
BMgn000484	0.209215	1.16501
BMgn000485	0.0325035	0.0780224
BMgn000488	0.307171	0.526382
BMgn000489	0.303818	0.188043
BMgn000490	0.647605	0.343375
BMgn000491	1.34195	1.89347
BMgn000492	0.893129	0.850935
BMgn000493	0.537722	0.277712
BMgn000494	0.115936	0.384776
BMgn000495	0.159768	0.0774198
BMgn000496	1.04526	1.13937
BMgn000497	0.338604	0.242338
BMgn000498	1.33752	1.19896
BMgn000499	0.857329	0.637499
BMgn000500	0.301969	0.172346
BMgn000501	1.08308	1.1909
BMgn000502	0.0504978	0.0285989
BMgn000503	0.669201	0.593358
BMgn000504	0.147185	0.0218377
BMgn000506	0.487396	0.177708
BMgn000507	0.692611	0.351523
BMgn000508	0.0111157	0.0336236
BMgn000509	0.372061	0.621021
BMgn000511	0.907209	0.92856
BMgn000512	0.0713226	0.0117176
BMgn000513	3.1199	1.7593
BMgn000514	0.240151	0.224521
BMgn000515	0.452496	0.336676
BMgn000517	0.192005	0.22161
BMgn000518	1.84137	1.40114
BMgn000519	0.200404	0.0348548
BMgn000520	0.224288	0.0878311
BMgn000521	0.849397	1.94562
BMgn000522	0.0486188	0.0295137
BMgn000523	0.490596	0.405817
BMgn000524	0.745669	0.616203
BMgn000525	0.255316	0.227935
BMgn000526	0.688691	0.59479
BMgn000528	1.51597	1.23309
BMgn000529	0.85877	0.660708
BMgn000530	0.880645	0.893707
BMgn000532	0.651812	0.759201
BMgn000533	1.18485	1.39859
BMgn000535	0.0711384	0.291163
BMgn000536	0.0686845	0.021614
BMgn000537	0.84909	1.2515
BMgn000538	0.0352314	0.0139497
BMgn000539	0.322466	0.0250004
BMgn000540	0.0966441	0.0954089
BMgn000541	0.437755	0.19361
BMgn000542	2.52084	2.03076
BMgn000543	0.697561	1.05468
BMgn000545	0.11706	0.096541
BMgn000546	0.0181271	0.00113934
BMgn000547	0.050571	0.0321058
BMgn000548	0.0694636	0.0369492
BMgn000549	0.59941	0.54447
BMgn000550	0.17744	0.173925
BMgn000551	0.363021	0.37478
BMgn000553	0.419429	0.757012
BMgn000554	0.33814	0.228295
BMgn000555	0.274195	0.098351
BMgn000556	0.219531	0.290493
BMgn000557	0.456081	0.511294
BMgn000558	0.705776	0.327625
BMgn000559	0.0943174	0.145354
BMgn000560	0.733815	0.925915
BMgn000561	0.536869	0.0534446
BMgn000562	0.211627	0.210088
BMgn000563	0.630636	0.222907
BMgn000564	0.0313536	0.0170191
BMgn000565	0.262799	0.143755
BMgn000566	0.833274	0.227297
BMgn000567	0.17776	0.294239
BMgn000568	0.637744	0.756292
BMgn000569	0.218187	0.316899
BMgn000570	0.0336893	0.0163827
BMgn000571	0.0162339	0.104528
BMgn000572	0.677988	0.609083
BMgn000573	0.484338	0.207454
BMgn000574	0.98898	1.06299
BMgn000575	0.623606	0.327579
BMgn000576	0.88409	1.2572
BMgn000577	1.59002	0.450935
BMgn000578	1.05531	0.490582
BMgn000579	0.504289	0.443348
BMgn000581	0.948423	0.824952
BMgn000582	0.385208	0.386814
BMgn000583	0.148607	0.297681
BMgn000584	0.316242	0.257864
BMgn000585	0.154356	0.0137121
BMgn000586	0.0419094	0.0501954
BMgn000587	0.23634	0.12938
BMgn000588	0.0404769	0.0343515
BMgn000589	0.112822	0.0260967
BMgn000590	0.00576206	0.00293268
BMgn000591	0.425934	0.858362
BMgn000592	0.0200012	0.514634
BMgn000593	0.576443	0.258754
BMgn000594	0.161516	0.236325
BMgn000598	0.54482	0.0821638
BMgn000599	0.645546	1.30051
BMgn000600	0.132026	0.0425891
BMgn000601	0.241686	0.144305
BMgn000602	1.0269	0.402404
BMgn000603	0.625288	1.27831
BMgn000604	0.976172	0.669241
BMgn000606	0.0570252	0.0268398
BMgn000607	1.12704	1.33198
BMgn000608	1.15364	1.17641
BMgn000609	0.644663	0.850288
BMgn000610	0.525085	0.279957
BMgn000611	0.0506442	0.37286
BMgn000612	0.462458	0.0575157
BMgn000614	0.055468	0.194948
BMgn000615	0.341989	0.456752
BMgn000616	0.856735	0.310522
BMgn000617	0.259472	0.0367837
BMgn000618	0.164753	0.379864
BMgn000620	0.010221	0.187341
BMgn000621	0.223909	0.0277138
BMgn000622	0.149961	0.0664368
BMgn000623	0.712624	0.55168
BMgn000624	0.267277	0.176102
BMgn000625	0.657419	0.196645
BMgn000626	0.688903	1.95562
BMgn000627	1.17618	1.08895
BMgn000628	0.37327	0.537183
BMgn000629	0.871149	0.0951817
BMgn000630	0.0342716	0.223066
BMgn000633	0.0128881	0.0951655
BMgn000634	0.478705	0.331791
BMgn000637	0.526163	0.0487742
BMgn000639	1.0696	0.67948
BMgn000640	0.820592	0.409147
BMgn000641	0.0395007	0.0626677
BMgn000642	0.294094	0.13597
BMgn000643	0.456205	0.911332
BMgn000644	0.39743	0.437814
BMgn000645	0.0103989	0.1094
BMgn000646	0.484643	0.175432
BMgn000647	0.141072	0.0653198
BMgn000648	0.529678	0.116742
BMgn000649	0.174613	0.28203
BMgn000650	0.239163	0.247729
BMgn000651	0.0318254	0.0949655
BMgn000652	0.793282	1.15154
BMgn000653	0.0275148	0.134985
BMgn000654	0.4698	0.00965226
BMgn000655	0.577492	0.774226
BMgn000656	0.157815	0.232295
BMgn000658	0.148338	0.188841
BMgn000659	0.0481139	0.507114
BMgn000661	0.159311	0.24271
BMgn000662	0.642351	0.874259
BMgn000663	1.44398	0.69452
BMgn000664	0.265016	0.104915
BMgn000665	0.326104	0.56949
BMgn000666	0.371754	0.813326
BMgn000667	0.0829253	0.746226
BMgn000668	1.20284	0.615056
BMgn000669	0.405431	0.858676
BMgn000670	0.637178	0.369959
BMgn000671	0.107393	0.0509468
BMgn000672	1.07488	1.50583
BMgn000673	1.08673	0.641913
BMgn000674	0.495122	0.290433
BMgn000675	0.0511031	0.0932449
BMgn000676	0.0134835	0.00539693
BMgn000677	0.673767	0.837197
BMgn000678	1.84116	1.39506
BMgn000679	0.118541	0.148607
BMgn000680	0.0293045	0.000469292
BMgn000681	0.0606655	0.0475854
BMgn000682	0.309831	0.328207
BMgn000683	0.941536	0.372931
BMgn000684	0.37286	0.620296
BMgn000685	0.932929	0.577574
BMgn000686	0.745742	0.21198
BMgn000687	0.000251964	0.109847
BMgn000688	0.0727837	0.159035
BMgn000689	0.337592	0.250581
BMgn000690	1.10408	0.229796
BMgn000691	0.525667	0.269234
BMgn000692	0.423336	0.512211
BMgn000693	0.238674	0.400674
BMgn000694	0.429189	0.837376
BMgn000695	1.13588	0.674916
BMgn000696	0.38525	0.209258
BMgn000697	0.034187	0.0102477
BMgn000698	0.481486	0.457473
BMgn000699	1.10436	0.244285
BMgn000700	0.0195921	0.178218
BMgn000701	0.451267	0.353028
BMgn000702	0.032672	0.0991797
BMgn000703	1.02546	1.21673
BMgn000705	0.046192	0.109892
BMgn000706	2.05836	0.789762
BMgn000707	0.923542	0.625783
BMgn000708	0.610196	0.329467
BMgn000710	0.190993	0.0681152
BMgn000711	0.00925724	0.04021
BMgn000712	0.0143311	0.0890023
BMgn000713	0.461225	1.09507
BMgn000714	0.183441	0.190063
BMgn000715	0.148974	0.0208296
BMgn000716	0.423302	1.71236
BMgn000717	0.244483	0.925915
BMgn000718	0.0592147	0.0331171
BMgn000719	1.14206	1.92621
BMgn000720	0.286207	0.609542
BMgn000721	0.54757	0.118524
BMgn000724	0.119192	0.174749
BMgn000725	0.915781	1.51201
BMgn000726	2.01102	1.32621
BMgn000727	0.27772	0.339666
BMgn000728	0.191647	0.46989
BMgn000729	0.00457542	0.0135059
BMgn000730	0.983844	0.636407
BMgn000731	0.716518	0.538276
BMgn000732	0.00753927	0.0383843
BMgn000733	0.376616	0.441676
BMgn000734	0.0465496	0.291248
BMgn000735	0.41366	0.440824
BMgn000736	0.223466	0.263524
BMgn000738	0.0546545	0.0103011
BMgn000739	0.792393	0.706041
BMgn000740	0.0334125	0.0324099
BMgn000741	0.157566	0.847039
BMgn000742	0.0284876	0.0159004
BMgn000743	0.0775964	0.0148341
BMgn000744	0.127885	0.310798
BMgn000746	0.683296	0.48904
BMgn000748	0.135092	0.13983
BMgn000749	0.319791	0.251804
BMgn000750	0.033755	0.427245
BMgn000751	0.392395	0.142601
BMgn000753	0.223263	0.188593
BMgn000754	1.75843	1.35732
BMgn000755	1.43577	1.24461
BMgn000756	0.0539557	0.0517974
BMgn000758	0.470531	0.72246
BMgn000759	0.912006	1.54238
BMgn000760	0.277983	0.298018
BMgn000761	0.90879	0.691052
BMgn000762	0.373475	0.526484
BMgn000763	0.391731	0.436507
BMgn000764	0.0434186	0.165738
BMgn000765	0.682354	1.36204
BMgn000766	1.31292	1.77932
BMgn000767	2.2727	2.1912
BMgn000768	0.0489103	0.101352
BMgn000769	1.25591	0.90389
BMgn000770	0.191114	0.243448
BMgn000771	2.72285	2.78281
BMgn000772	0.219971	0.337762
BMgn000773	0.0315544	0.0160311
BMgn000774	0.048575	0.0138107
BMgn000775	0.0259122	0.010261
BMgn000776	0.529046	0.217055
BMgn000777	0.577345	0.128924
BMgn000778	1.36198	0.574922
BMgn000779	0.15417	0.378813
BMgn000780	0.253568	0.28393
BMgn000781	0.0297601	0.0185257
BMgn000782	0.664923	0.618831
BMgn000783	0.217699	0.229796
BMgn000784	0.331623	0.393855
BMgn000786	3.75811	2.16784
BMgn000787	0.989064	1.34359
BMgn000788	0.496291	0.318668
BMgn000789	0.115375	0.01108
BMgn000790	0.0446057	0.153663
BMgn000791	0.533518	0.728553
BMgn000792	1.06895	0.81443
BMgn000794	0.648938	0.610657
BMgn000799	0.427582	0.321108
BMgn000800	3.29645	1.71278
BMgn000802	0.0920461	0.255824
BMgn000803	0.638046	0.476813
BMgn000804	0.676872	0.0675922
BMgn000805	1.30125	0.110743
BMgn000807	0.184788	0.209258
BMgn000808	0.82661	0.691158
BMgn000809	0.0764244	0.256608
BMgn000810	0.139824	0.000821593
BMgn000811	0.101988	0.078683
BMgn000812	0.79172	1.02284
BMgn000813	2.0976	0.685438
BMgn000814	0.311856	0.227532
BMgn000815	0.646507	1.17461
BMgn000816	0.246486	0.317034
BMgn000817	0.0514941	0.0726604
BMgn000818	0.312337	0.157347
BMgn000819	1.35257	0.588162
BMgn000820	0.589645	0.482487
BMgn000823	0.512254	0.43766
BMgn000824	0.0203697	0.00896009
BMgn000825	1.27876	0.835439
BMgn000826	0.0419716	0.0198875
BMgn000827	0.127634	0.0438988
BMgn000828	1.45114	0.62995
BMgn000829	0.384471	0.444906
BMgn000830	0.799779	0.240174
BMgn000831	0.632495	0.761126
BMgn000832	0.135976	0.641304
BMgn000833	0.0607804	0.229251
BMgn000834	0.759101	0.437564
BMgn000835	0.295532	0.0787506
BMgn000836	1.23263	0.592032
BMgn000837	0.304264	0.064654
BMgn000838	0.174269	0.194058
BMgn000839	1.96561	1.21169
BMgn000840	0.374955	1.2027
BMgn000841	1.07395	0.798958
BMgn000842	0.0378391	0.0573075
BMgn000843	2.05611	1.54661
BMgn000844	2.13116	1.22744
BMgn000845	1.23964	0.585361
BMgn000846	0.609312	0.730814
BMgn000847	0.654058	0.685564
BMgn000848	0.995851	1.05832
BMgn000849	0.0901606	0.147258
BMgn000850	0.0206793	0.0183309
BMgn000851	1.11225	0.257165
BMgn000852	2.0712	1.2995
BMgn000853	2.41706	2.3744
BMgn000854	1.02689	1.01605
BMgn000855	0.140321	0.0825207
BMgn000856	0.129889	0.473687
BMgn000857	0.0939237	0.0193014
BMgn000858	0.708409	1.0427
BMgn000859	0.841185	1.34217
BMgn000860	0.538306	0.5157
BMgn000861	0.197918	0.8679
BMgn000862	0.72981	2.22324
BMgn000863	0.0176293	0.00105662
BMgn000864	0.0634913	0.534855
BMgn000865	0.643439	1.14344
BMgn000866	0.241482	0.226616
BMgn000867	1.71202	1.93843
BMgn000868	0.00193692	0.0354481
BMgn000869	0.407435	0.32381
BMgn000870	0.350305	0.685627
BMgn000871	0.670765	0.535421
BMgn000873	1.5013	1.43916
BMgn000874	0.320663	0.391314
BMgn000875	0.795554	0.549997
BMgn000876	0.650664	1.19115
BMgn000877	0.0322602	0.000373654
BMgn000878	0.791344	0.569602
BMgn000879	0.332734	0.316098
BMgn000880	0.974285	1.31562
BMgn000881	1.1431	0.41879
BMgn000882	0.613269	0.870761
BMgn000883	0.0889063	0.108368
BMgn000884	0.262068	0.429154
BMgn000885	0.214592	0.550506
BMgn000888	0.157185	0.106116
BMgn000889	0.0016491	0.00174502
BMgn000890	0.522286	0.709164
BMgn000891	0.914924	1.49613
BMgn000892	1.03815	0.741315
BMgn000894	0.0945225	0.192451
BMgn000895	0.961261	0.55264
BMgn000896	0.139848	0.132745
BMgn000897	1.26058	0.919987
BMgn000898	5.2652	4.78516
BMgn000899	0.688903	0.798439
BMgn000900	0.212922	0.0369492
BMgn000903	0.763639	0.154995
BMgn000904	0.456267	1.26861
BMgn000905	0.844482	0.673357
BMgn000906	0.119409	0.698883
BMgn000907	0.406227	0.16936
BMgn000909	1.81302	1.23426
BMgn000910	0.0745745	0.04528
BMgn000911	0.0236317	0.0244441
BMgn000912	0.15809	0.033755
BMgn000913	0.685964	0.637178
BMgn000914	0.636877	0.739571
BMgn000915	0.149991	0.0857732
BMgn000916	0.294872	0.335612
BMgn000919	0.337554	0.237074
BMgn000920	0.387078	0.285109
BMgn000921	0.164449	0.149017
BMgn000922	1.4399	1.15493
BMgn000924	0.242665	0.151017
BMgn000925	2.30659	4.12148
BMgn000926	0.0470962	0.0955983
BMgn000927	0.103083	0.106982
BMgn000928	0.104163	0.156537
BMgn000929	0.290476	0.337507
BMgn000930	1.82197	1.90372
BMgn000932	0.3394	0.504109
BMgn000933	0.00103921	0.0076807
BMgn000934	0.134914	0.195104
BMgn000937	0.05655	0.0215912
BMgn000938	0.836451	2.06937
BMgn000939	0.671763	1.47193
BMgn000940	1.34616	1.58798
BMgn000941	0.0462403	0.00239521
BMgn000942	1.13274	0.532081
BMgn000943	0.628489	0.658882
BMgn000944	0.499366	0.817215
BMgn000945	0.875105	0.550568
BMgn000946	0.129883	0.0907811
BMgn000947	0.140351	0.086976
BMgn000948	0.437398	0.372624
BMgn000949	1.16106	1.61413
BMgn000950	0.0763468	0.0570301
BMgn000951	0.140159	0.0968177
BMgn000952	0.373362	0.470031
BMgn000953	1.33446	1.71586
BMgn000955	2.64482	1.64123
BMgn000957	1.49151	0.523024
BMgn000958	0.514023	0.466635
BMgn000959	1.36475	0.775571
BMgn000960	0.234816	0.509761
BMgn000961	0.352451	0.0724808
BMgn000962	0.718058	0.203148
BMgn000963	1.50398	0.914816
BMgn000964	0.052532	0.679812
BMgn000965	0.107021	0.245415
BMgn000966	0.0133492	0.017123
BMgn000967	0.940664	0.588212
BMgn000968	0.358714	0.13947
BMgn000969	0.817671	0.234592
BMgn000970	1.08529	1.2572
BMgn000971	0.102791	0.0231046
BMgn000972	0.069163	0.146022
BMgn000973	0.0476629	0.0552361
BMgn000974	0.314957	0.214777
BMgn000975	0.00988323	0.0126466
BMgn000976	1.27621	1.12491
BMgn000977	0.29788	0.629524
BMgn000978	1.30435	1.04504
BMgn000979	1.09291	0.511224
BMgn000980	2.0712	0.998396
BMgn000981	0.686618	1.15359
BMgn000982	0.118729	0.619608
BMgn000983	1.18706	0.852602
BMgn000984	1.5098	0.96409
BMgn000985	2.23641	0.885189
BMgn000986	0.258029	0.778612
BMgn000987	0.0204471	0.171579
BMgn000989	1.76493	1.11882
BMgn000990	0.990974	0.184044
BMgn000991	1.34025	1.06346
BMgn000992	0.746395	0.843633
BMgn000993	0.900354	1.09602
BMgn000994	1.41504	0.547187
BMgn000995	1.74376	1.13617
BMgn000996	0.180601	0.16007
BMgn000997	0.0970512	0.122105
BMgn000998	0.121938	0.367391
BMgn000999	0.285595	0.540879
BMgn001000	0.0621713	0.101225
BMgn001001	0.00379051	0.166853
BMgn001002	0.316071	0.0593391
BMgn001003	0.68294	0.152211
BMgn001004	0.168911	0.0989342
BMgn001005	0.126307	0.240453
BMgn001006	0.0445095	0.0121952
BMgn001007	0.1934	0.387651
BMgn001008	0.0638383	0.0127539
BMgn001009	1.85103	1.38885
BMgn001010	0.0154367	0.0293789
BMgn001011	0.0941825	0.0605706
BMgn001012	0.303216	0.22729
BMgn001014	0.174327	0.755278
BMgn001015	0.483795	0.16677
BMgn001016	0.266249	0.763488
BMgn001018	0.168341	0.227341
BMgn001019	0.148821	0.0925886
BMgn001020	0.677719	0.0983564
BMgn001021	0.517241	0.525755
BMgn001022	0.0125438	0.00624203
BMgn001023	0.0743528	0.30237
BMgn001024	1.30227	1.46524
BMgn001025	0.601904	0.605041
BMgn001026	0.131373	0.107577
BMgn001027	0.0427089	0.014915
BMgn001028	0.397658	0.681123
BMgn001029	0.493224	0.770062
BMgn001030	0.644319	1.38648
BMgn001032	0.818271	1.4614
BMgn001033	1.18781	0.692697
BMgn001034	0.207945	0.288615
BMgn001035	2.77882	3.11996
BMgn001036	0.610781	0.393855
BMgn001037	0.00446571	0.0160041
BMgn001038	0.194547	0.0917134
BMgn001039	0.0161753	0.0263412
BMgn001040	0.144348	0.194207
BMgn001041	0.0291652	0.0317973
BMgn001042	0.135264	0.185413
BMgn001043	6.13608	4.88606
BMgn001044	0.0465351	0.0427999
BMgn001045	0.0217784	0.0214269
BMgn001046	0.0568321	0.0626978
BMgn001047	0.580953	0.697886
BMgn001048	0.00449204	0.0015532
BMgn001049	0.012298	0.111472
BMgn001050	0.242976	1.48147
BMgn001051	0.205875	0.62995
BMgn001052	1.43185	1.49979
BMgn001053	0.401078	0.317674
BMgn001055	1.26127	0.947383
BMgn001056	0.162803	0.101598
BMgn001057	0.179588	0.108669
BMgn001058	0.132521	0.159198
BMgn001059	0.12862	0.143833
BMgn001060	0.645066	0.418528
BMgn001061	0.602895	0.693232
BMgn001062	2.35983	2.13518
BMgn001063	0.522879	0.327902
BMgn001064	1.08632	1.38145
BMgn001067	0.307761	0.586415
BMgn001068	0.474592	1.13749
BMgn001069	0.00287147	0.0392154
BMgn001070	1.10514	0.866301
BMgn001071	0.112377	0.12647
BMgn001072	0.487622	1.03872
BMgn001073	1.48122	1.29506
BMgn001074	0.0937673	0.0158058
BMgn001075	0.953349	1.45216
BMgn001076	0.159004	0.123511
BMgn001077	0.0922663	0.515245
BMgn001078	0.424397	0.924891
BMgn001079	0.0130895	0.0429245
BMgn001080	0.84762	2.40155
BMgn001081	0.185393	0.159831
BMgn001082	0.0944794	0.0623166
BMgn001083	0.545292	0.198809
BMgn001084	1.22188	1.89276
BMgn001085	0.146874	0.468904
BMgn001086	0.126156	0.323361
BMgn001091	0.0346572	0.086361
BMgn001092	0.995593	0.826027
BMgn001093	0.224936	0.146679
BMgn001094	0.00473345	0.139764
BMgn001095	0.264792	0.358575
BMgn001096	0.0566044	0.379354
BMgn001097	1.17503	0.949543
BMgn001098	0.25321	0.544485
BMgn001100	0.272386	0.602077
BMgn001101	0.250728	0.25814
BMgn001102	0.454928	0.507519
BMgn001103	0.151429	0.148919
BMgn001105	1.16471	1.11051
BMgn001106	3.17224	3.53883
BMgn001107	0.388011	0.458471
BMgn001108	0.0308311	0.00690781
BMgn001109	0.249584	0.534216
BMgn001110	0.529325	0.590067
BMgn001111	0.0710923	0.145457
BMgn001112	1.48817	1.24968
BMgn001113	0.0832619	0.131314
BMgn001115	0.381889	0.282846
BMgn001116	0.130164	0.158115
BMgn001117	0.198541	0.0834039
BMgn001118	0.396087	1.00688
BMgn001119	0.154852	0.131085
BMgn001120	0.272402	0.835498
BMgn001121	0.244209	0.326481
BMgn001122	0.107115	0.0232237
BMgn001123	0.173569	0.218597
BMgn001124	1.18577	0.836332
BMgn001125	0.561015	0.933227
BMgn001126	0.0532285	0.088933
BMgn001128	1.13976	0.484961
BMgn001130	0.0448657	0.0460326
BMgn001131	0.412895	0.426537
BMgn001132	0.0938212	0.00787524
BMgn001133	0.66987	0.757111
BMgn001134	0.661504	0.145409
BMgn001135	0.746856	0.460711
BMgn001136	0.136635	0.095344
BMgn001137	2.67559	2.19968
BMgn001138	0.343835	0.131849
BMgn001139	0.67615	0.480723
BMgn001142	1.82278	1.57334
BMgn001143	0.0146903	0.29012
BMgn001144	0.34349	0.235547
BMgn001145	0.452755	1.17779
BMgn001146	0.261537	0.430018
BMgn001147	0.0195966	0.0863451
BMgn001148	0.335067	0.519217
BMgn001149	0.0583842	0.0631948
BMgn001150	0.327108	1.14412
BMgn001151	0.807962	0.884623
BMgn001153	0.213547	0.176526
BMgn001154	1.55196	0.965612
BMgn001155	1.37477	0.981092
BMgn001156	1.74567	1.65353
BMgn001157	0.916211	0.761954
BMgn001159	0.0847216	0.00557286
BMgn001160	1.62988	1.36143
BMgn001161	0.159047	0.514449
BMgn001162	0.617173	1.32002
BMgn001163	0.117077	1.06981
BMgn001165	1.50501	1.86812
BMgn001166	2.03566	1.4176
BMgn001167	0.112974	0.0401719
BMgn001168	0.980012	0.508302
BMgn001169	1.69077	1.94188
BMgn001170	0.219582	0.553882
BMgn001171	0.292873	0.0881662
BMgn001172	0.237366	0.338093
BMgn001173	0.173724	0.184854
BMgn001174	0.849704	0.718898
BMgn001175	0.995593	1.00315
BMgn001176	0.747778	0.376224
BMgn001177	0.760225	0.793282
BMgn001178	0.866397	1.17114
BMgn001179	0.229509	0.224062
BMgn001181	0.952063	0.551108
BMgn001182	0.571687	0.48258
BMgn001183	2.86681	1.49526
BMgn001185	0.412716	0.421659
BMgn001186	1.06979	0.696415
BMgn001187	0.564905	0.205784
BMgn001188	0.551742	0.752125
BMgn001189	1.72145	0.867804
BMgn001190	1.86934	1.16982
BMgn001191	0.0994144	0.195683
BMgn001192	0.114786	0.0115347
BMgn001193	0.618325	0.173452
BMgn001194	0.997402	0.804073
BMgn001195	1.37971	1.78622
BMgn001196	1.07209	1.31607
BMgn001197	0.580556	0.924636
BMgn001198	0.517584	0.894865
BMgn001199	1.11561	0.949311
BMgn001200	0.346739	0.536839
BMgn001201	1.68125	2.65136
BMgn001202	0.0555914	0.0605157
BMgn001203	0.0226972	0.0107861
BMgn001205	0.733604	0.809136
BMgn001206	0.0386833	0.0467188
BMgn001208	0.869313	0.874519
BMgn001209	1.18792	1.95798
BMgn001210	0.603626	0.294102
BMgn001211	0.910943	1.43263
BMgn001212	0.0851757	0.833688
BMgn001213	0.516128	0.443866
BMgn001214	0.128626	0.284164
BMgn001215	0.650586	0.350354
BMgn001216	0.120291	0.0426897
BMgn001217	1.09528	0.651812
BMgn001218	0.73582	0.623624
BMgn001219	0.366148	0.16677
BMgn001220	1.20703	1.53229
BMgn001221	0.0553989	0.0272373
BMgn001223	0.612717	0.64919
BMgn001224	0.179937	0.316404
BMgn001225	0.832299	1.11221
BMgn001226	0.900492	0.489938
BMgn001228	1.51247	0.647528
BMgn001229	0.967462	0.893945
BMgn001230	0.27289	0.168719
BMgn001232	0.13051	0.602355
BMgn001233	0.0202832	0.0530911
BMgn001234	0.0742961	0.0723217
BMgn001235	0.309025	0.425552
BMgn001236	0.456118	0.0849644
BMgn001237	0.331335	0.0432363
BMgn001238	0.742585	1.75289
BMgn001239	0.640373	0.378813
BMgn001240	0.038973	0.0429341
BMgn001241	0.0870981	0.0480751
BMgn001242	0.188546	0.149348
BMgn001243	3.01506	2.67319
BMgn001244	0.127634	0.0319609
BMgn001245	0.010657	0.534766
BMgn001246	0.16233	0.0848852
BMgn001247	0.953466	0.822868
BMgn001248	0.017358	0.0793498
BMgn001249	1.30168	0.907595
BMgn001250	2.59901	2.62843
BMgn001252	2.05318	2.90703
BMgn001253	0.111714	0.0882566
BMgn001254	1.12243	1.7015
BMgn001256	0.120824	0.194356
BMgn001257	2.01315	2.11403
BMgn001258	0.167612	0.109635
BMgn001259	1.10356	0.407346
BMgn001261	0.0617305	0.118376
BMgn001262	0.287308	0.159831
BMgn001263	0.936817	0.774639
BMgn001264	0.39532	1.03959
BMgn001265	1.12371	0.508947
BMgn001266	0.146807	0.0410684
BMgn001267	0.298639	0.769679
BMgn001268	0.102378	0.0252489
BMgn001269	1.45876	1.45832
BMgn001270	0.00653732	0.154666
BMgn001271	0.252099	0.157378
BMgn001272	0.221632	0.515942
BMgn001273	0.660986	0.260879
BMgn001274	0.150488	0.608994
BMgn001275	0.216661	0.188237
BMgn001276	0.188432	0.0267659
BMgn001277	0.483941	0.612112
BMgn001278	0.0383749	0.0251983
BMgn001279	1.17099	0.843724
BMgn001281	0.49236	0.848661
BMgn001282	2.50582	1.53005
BMgn001283	1.9179	1.49295
BMgn001284	0.285226	0.484431
BMgn001286	1.3205	1.4769
BMgn001287	0.454322	1.3148
BMgn001288	0.773503	0.467284
BMgn001289	0.113961	0.278354
BMgn001290	0.9426	0.569441
BMgn001291	0.0069387	0.000199821
BMgn001292	0.144754	0.0629437
BMgn001293	0.0697134	0.0632601
BMgn001294	0.0480217	0.0267474
BMgn001296	1.03119	0.324432
BMgn001297	0.873901	0.735159
BMgn001298	0.0438988	0.0198557
BMgn001299	0.00805218	0.0520078
BMgn001300	0.660906	0.336676
BMgn001301	0.247352	1.31369
BMgn001302	5.55284	4.38616
BMgn001303	1.52347	0.971713
BMgn001304	0.0840675	0.242779
BMgn001305	0.109054	0.419166
BMgn001306	0.134215	0.292796
BMgn001307	1.19771	0.931109
BMgn001308	0.553696	0.202269
BMgn001309	0.166203	0.517512
BMgn001310	0.0673284	0.304764
BMgn001312	0.144184	0.147886
BMgn001313	0.210257	0.2467
BMgn001315	0.0711281	0.119896
BMgn001316	0.98506	0.0379386
BMgn001317	0.975802	1.42996
BMgn001318	1.89143	3.04614
BMgn001320	1.01748	0.364014
BMgn001321	0.988303	0.694197
BMgn001322	0.239344	0.273061
BMgn001323	0.27698	0.396347
BMgn001324	0.137177	0.0717681
BMgn001326	0.199785	0.239955
BMgn001327	0.745476	1.28888
BMgn001328	0.934831	0.263651
BMgn001330	0.352451	0.0724808
BMgn001331	0.183732	1.00327
BMgn001332	0.805791	0.704279
BMgn001333	0.0882407	0.0795897
BMgn001334	0.109657	0.0178781
BMgn001335	0.220685	0.226616
BMgn001336	0.678402	1.53883
BMgn001337	0.247045	0.420319
BMgn001338	0.0481236	0.407957
BMgn001339	0.314697	0.680602
BMgn001340	0.340616	0.387926
BMgn001341	0.421349	0.414539
BMgn001342	0.188459	0.365231
BMgn001343	0.641475	0.288783
BMgn001344	1.05583	0.969441
BMgn001345	1.10938	0.892044
BMgn001346	0.101944	0.0609652
BMgn001347	0.832683	0.580474
BMgn001348	0.0227246	0.0318768
BMgn001350	0.0839937	0.125698
BMgn001351	0.0654864	0.00700932
BMgn001352	0.746492	0.351552
BMgn001354	0.333585	1.79512
BMgn001355	0.288876	0.683464
BMgn001356	0.664321	0.708631
BMgn001358	1.51134	1.22302
BMgn001359	0.0261289	0.0758034
BMgn001360	0.634063	0.328661
BMgn001361	1.82751	2.08464
BMgn001362	0.302117	0.908333
BMgn001363	3.19417	2.6885
BMgn001364	0.313364	0.0405245
BMgn001365	0.823619	0.603086
BMgn001366	0.682417	0.540954
BMgn001367	0.870342	0.462584
BMgn001368	0.451893	0.102016
BMgn001369	0.0196148	0.00138761
BMgn001370	0.374451	0.75731
BMgn001371	1.28732	0.26846
BMgn001372	0.403359	0.499544
BMgn001373	0.6574	0.0750285
BMgn001374	0.102725	0.635599
BMgn001375	0.0604308	0.0982421
BMgn001376	0.0737914	0.0471882
BMgn001377	0.458808	0.755031
BMgn001379	0.261037	0.168329
BMgn001380	0.825272	1.05318
BMgn001381	0.109423	0.218216
BMgn001382	0.358625	0.597429
BMgn001383	0.0138824	0.0932126
BMgn001384	1.18621	1.12701
BMgn001385	0.230298	0.0875707
BMgn001386	2.92573	2.47966
BMgn001387	0.653667	0.237074
BMgn001388	0.0741158	0.188338
BMgn001389	0.0718654	0.0861226
BMgn001390	0.884656	0.409325
BMgn001391	0.102208	0.13489
BMgn001392	0.72432	0.613501
BMgn001393	0.0535281	0.288927
BMgn001395	2.46858	1.80841
BMgn001396	0.282147	0.524808
BMgn001397	0.096194	0.00949243
BMgn001398	0.333941	0.904343
BMgn001399	0.0471591	0.056738
BMgn001400	1.54691	2.1526
BMgn001401	0.254426	0.097475
BMgn001402	0.42465	0.299365
BMgn001403	0.145597	0.115171
BMgn001404	0.0467914	0.020693
BMgn001405	0.0613602	0.0361602
BMgn001406	0.155715	0.0521939
BMgn001407	0.44568	0.746735
BMgn001408	0.718058	0.203148
BMgn001409	0.189089	0.239231
BMgn001410	0.483703	0.74098
BMgn001411	0.226345	0.25682
BMgn001412	0.0370201	0.00773375
BMgn001414	0.731867	0.497778
BMgn001415	0.022926	0.699448
BMgn001416	0.547907	0.699165
BMgn001417	0.698579	0.536839
BMgn001418	0.79626	0.955578
BMgn001419	0.971225	0.378813
BMgn001421	0.223422	0.350432
BMgn001422	0.126209	0.0436539
BMgn001423	1.78352	1.25987
BMgn001424	0.201688	0.229148
BMgn001425	2.28016	1.16301
BMgn001426	0.815536	0.658051
BMgn001427	0.314581	1.25573
BMgn001428	0.252557	0.615056
BMgn001429	0.235249	0.940626
BMgn001430	0.0485459	0.0202741
BMgn001431	0.86385	0.738309
BMgn001433	0.0928037	0.177597
BMgn001434	0.216254	0.223531
BMgn001435	1.03377	0.559359
BMgn001436	0.335349	0.63058
BMgn001437	1.51348	1.97306
BMgn001438	0.871116	0.478274
BMgn001439	0.619554	0.342351
BMgn001441	0.4178	1.02468
BMgn001442	0.0338536	0.00118289
BMgn001444	0.441976	0.70106
BMgn001445	0.690327	0.40425
BMgn001446	0.227348	0.0486771
BMgn001447	0.0755708	0.0408584
BMgn001448	0.0355895	0.0846846
BMgn001449	0.456777	0.719012
BMgn001451	0.433303	0.653119
BMgn001452	0.0857045	0.808857
BMgn001453	0.0577984	0.0861438
BMgn001454	0.128871	0.0667811
BMgn001456	0.655549	1.27274
BMgn001457	1.47468	0.775571
BMgn001458	0.19629	0.306405
BMgn001460	2.01656	2.17094
BMgn001462	0.811437	0.40457
BMgn001463	0.0820746	0.102175
BMgn001464	0.566038	1.26265
BMgn001465	0.0243385	0.0835671
BMgn001466	1.13185	0.590016
BMgn001467	0.737739	0.512296
BMgn001468	0.328661	0.631806
BMgn001469	0.0886506	0.0427184
BMgn001470	1.15704	0.41879
BMgn001471	2.04754	2.53663
BMgn001472	0.710456	1.16479
BMgn001473	0.990762	0.973508
BMgn001474	1.09652	0.966697
BMgn001475	0.213561	0.359111
BMgn001476	0.0213539	0.0275287
BMgn001477	1.052	1.19351
BMgn001478	2.32414	2.36095
BMgn001479	0.0319095	0.0127852
BMgn001480	0.0673791	0.063964
BMgn001481	0.581632	0.960388
BMgn001482	0.205951	0.0593441
BMgn001483	0.668998	0.569425
BMgn001484	0.322329	0.227275
BMgn001485	0.68487	0.683401
BMgn001486	1.8	0.883459
BMgn001487	0.0580317	0.245033
BMgn001488	0.212235	0.303146
BMgn001489	0.0273945	0.028687
BMgn001490	0.14635	1.05873
BMgn001491	0.124227	0.32502
BMgn001492	0.256725	0.99555
BMgn001493	0.0150498	0.00160551
BMgn001494	0.0554581	0.0353586
BMgn001495	0.375769	0.613358
BMgn001496	1.73698	1.23362
BMgn001497	0.155094	0.0767197
BMgn001498	0.0910916	0.00873847
BMgn001499	0.031111	0.0195376
BMgn001501	3.62532	1.41677
BMgn001502	0.898047	1.14012
BMgn001503	0.655745	0.541483
BMgn001504	0.26536	0.0655925
BMgn001505	0.356143	0.381481
BMgn001506	0.0873954	0.107021
BMgn001507	0.178002	0.0829832
BMgn001508	0.477843	0.750533
BMgn001509	2.55862	3.38982
BMgn001510	0.376007	0.728949
BMgn001511	0.14303	0.065648
BMgn001512	0.708787	0.631044
BMgn001513	1.10419	0.502835
BMgn001514	0.923432	2.57799
BMgn001515	1.5493	1.65208
BMgn001516	0.345496	0.937757
BMgn001518	0.190077	0.119753
BMgn001519	0.201418	0.161038
BMgn001520	0.500987	0.471868
BMgn001521	0.126633	0.207391
BMgn001522	4.4168	3.05004
BMgn001523	2.0221	3.4383
BMgn001524	0.208906	0.917969
BMgn001525	0.0421629	0.0949709
BMgn001526	0.0582452	0.0146678
BMgn001527	0.753698	0.705578
BMgn001528	0.182342	0.134339
BMgn001529	0.0942203	0.0747189
BMgn001530	0.309946	0.65492
BMgn001531	0.668633	0.29966
BMgn001532	1.37523	0.544485
BMgn001533	0.380938	0.247115
BMgn001534	0.264417	0.479372
BMgn001536	0.930776	0.716631
BMgn001537	0.167434	0.0798871
BMgn001538	0.374554	0.381481
BMgn001539	0.1437	0.0476678
BMgn001541	0.024559	0.0402243
BMgn001542	0.621439	0.64859
BMgn001543	0.00964338	0.246616
BMgn001544	0.400761	0.560588
BMgn001545	0.0795845	0.0206019
BMgn001547	1.40593	2.42384
BMgn001548	0.252705	0.264473
BMgn001550	0.910943	0.120543
BMgn001551	0.107516	0.110642
BMgn001552	1.22924	0.631341
BMgn001553	0.147758	0.290001
BMgn001554	1.34381	0.683107
BMgn001555	0.974817	0.526294
BMgn001556	1.15285	1.04985
BMgn001557	0.853097	0.833067
BMgn001558	1.13467	1.08375
BMgn001559	0.45887	0.719467
BMgn001560	0.30176	0.203564
BMgn001561	0.330293	0.217391
BMgn001562	0.544363	0.706637
BMgn001563	0.0294997	0.0890236
BMgn001564	0.83062	1.75166
BMgn001565	0.289925	0.124025
BMgn001566	0.814061	0.713903
BMgn001567	0.0388258	0.0439421
BMgn001569	0.0618407	0.101253
BMgn001570	0.168098	0.0154457
BMgn001571	0.482778	0.62113
BMgn001572	0.290925	0.203891
BMgn001573	0.0309011	0.0845157
BMgn001574	1.28334	0.376958
BMgn001575	0.365523	0.370896
BMgn001577	0.217312	0.0415365
BMgn001578	0.071512	0.0635466
BMgn001579	1.23642	0.886993
BMgn001581	0.872766	2.02109
BMgn001582	0.303687	0.177544
BMgn001586	0.150433	0.490287
BMgn001587	0.0295137	0.0836303
BMgn001588	0.084558	0.0584687
BMgn001589	0.178382	0.229745
BMgn001590	0.299002	0.179444
BMgn001591	1.33087	1.27937
BMgn001592	1.07894	0.427605
BMgn001593	0.887864	0.504581
BMgn001594	0.198274	0.0834724
BMgn001595	0.0071285	0.0461582
BMgn001596	0.137857	0.321181
BMgn001597	0.136624	0.294162
BMgn001598	0.271451	0.00787082
BMgn001599	0.385187	0.100754
BMgn001600	0.256773	0.326113
BMgn001601	0.170625	0.124684
BMgn001602	0.971225	0.868991
BMgn001606	0.256044	0.826464
BMgn001609	0.35567	0.402031
BMgn001610	0.700057	0.863565
BMgn001611	1.05827	0.401888
BMgn001612	1.25413	1.68021
BMgn001613	1.15498	0.718285
BMgn001615	0.0347277	0.0354198
BMgn001616	0.100163	0.0870821
BMgn001617	0.373239	0.174236
BMgn001618	0.50882	0.13769
BMgn001619	0.246417	0.192479
BMgn001620	0.567127	1.42394
BMgn001621	0.500519	0.97314
BMgn001622	0.00651527	0.138334
BMgn001623	0.184575	0.0969317
BMgn001624	0.148577	0.143767
BMgn001625	0.0144882	0.05532
BMgn001626	0.00574445	0.0489346
BMgn001627	0.151238	0.107466
BMgn001628	1.80181	0.433492
BMgn001629	0.080561	0.0674197
BMgn001630	1.22459	1.91421
BMgn001631	0.501028	0.428839
BMgn001632	0.0576298	0.0198011
BMgn001633	0.101889	0.0362122
BMgn001634	0.066933	0.0300439
BMgn001635	0.0479684	0.0315311
BMgn001636	0.0196148	0.0301975
BMgn001637	4.63451	3.14663
BMgn001638	2.1071	1.48845
BMgn001639	0.410184	0.240264
BMgn001641	0.652124	1.39067
BMgn001642	0.602599	0.195901
BMgn001643	0.578215	0.585043
BMgn001644	1.75355	2.10417
BMgn001645	0.0142234	0.0107282
BMgn001646	0.137952	0.054364
BMgn001647	0.791317	0.975637
BMgn001648	0.148754	0.335255
BMgn001649	0.977695	0.29966
BMgn001650	0.409983	0.689498
BMgn001651	0.00972776	0.0349159
BMgn001652	1.32182	0.719854
BMgn001653	0.049864	0.0630693
BMgn001654	1.79923	1.24797
BMgn001655	0.719308	0.353263
BMgn001656	0.428641	0.281357
BMgn001657	0.404372	1.18054
BMgn001658	0.404614	0.432668
BMgn001659	1.11221	0.950317
BMgn001660	1.42901	1.22502
BMgn001661	0.684891	0.70305
BMgn001662	0.0746879	0.149182
BMgn001663	0.349974	0.763866
BMgn001664	0.11969	0.188982
BMgn001665	0.393425	0.569328
BMgn001666	0.622985	1.69512
BMgn001668	0.325359	0.681728
BMgn001669	0.0375028	0.0700245
BMgn001670	0.934308	0.776374
BMgn001672	0.0173128	0.00146169
BMgn001674	0.150077	0.052287
BMgn001675	0.171211	0.559359
BMgn001676	0.465961	0.37791
BMgn001677	0.244758	0.0995346
BMgn001678	0.438994	0.119655
BMgn001679	1.59196	1.15989
BMgn001681	0.224098	0.189431
BMgn001683	0.806236	1.10306
BMgn001684	0.215911	0.219409
BMgn001685	0.338235	0.78431
BMgn001686	0.450788	0.83354
BMgn001687	1.61751	1.60952
BMgn001688	0.0282975	0.00580167
BMgn001689	0.0577141	0.385271
BMgn001690	0.21049	0.129994
BMgn001691	0.026212	0.0047115
BMgn001692	0.0580267	0.0946467
BMgn001693	0.473002	0.791129
BMgn001694	0.618073	1.19483
BMgn001695	0.0031601	0.0713789
BMgn001696	0.158078	0.164214
BMgn001697	0.585829	0.515999
BMgn001698	0.0350948	0.031027
BMgn001699	2.07361	2.13908
BMgn001700	1.08688	0.953115
BMgn001701	0.0324895	0.0684506
BMgn001702	0.321154	0.256349
BMgn001703	0.170413	0.748289
BMgn001704	0.819874	0.66039
BMgn001705	0.830384	0.561062
BMgn001706	0.129017	0.213249
BMgn001707	0.284272	0.450225
BMgn001708	0.386581	0.848416
BMgn001709	0.519763	0.756987
BMgn001710	0.395731	0.534796
BMgn001711	0.590388	0.750068
BMgn001712	1.5211	1.98902
BMgn001713	0.0831935	0.216382
BMgn001714	0.0850806	0.168405
BMgn001715	0.0192878	0.00720356
BMgn001716	0.754487	1.5246
BMgn001717	0.726166	0.365755
BMgn001718	0.639426	0.400106
BMgn001719	1.23578	1.49609
BMgn001720	0.0254469	0.226792
BMgn001721	0.405674	0.165319
BMgn001722	0.00111322	0.014897
BMgn001723	0.659973	0.989785
BMgn001724	0.919446	0.16677
BMgn001725	0.111158	0.200887
BMgn001727	0.168245	0.530252
BMgn001728	0.642389	0.955539
BMgn001729	1.21501	1.22013
BMgn001730	1.13009	1.3698
BMgn001731	0.242528	0.471868
BMgn001732	0.0652542	0.0812936
BMgn001733	0.232429	0.0242834
BMgn001734	0.535153	1.24132
BMgn001735	0.934794	0.373475
BMgn001736	0.0903317	0.331931
BMgn001737	0.618885	1.06215
BMgn001738	0.594602	0.504581
BMgn001739	0.612539	0.139183
BMgn001740	0.690114	0.34281
BMgn001742	0.175998	0.2277
BMgn001743	0.10706	0.0271957
BMgn001744	0.0929973	0.0308405
BMgn001745	0.0600367	0.0851969
BMgn001746	1.00265	0.998396
BMgn001747	0.20421	0.0442016
BMgn001748	0.433763	0.657439
BMgn001749	0.129543	0.0446875
BMgn001750	0.439926	0.344545
BMgn001751	0.630877	0.253202
BMgn001753	0.160824	0.573017
BMgn001754	0.0724295	0.0477696
BMgn001755	0.568894	0.529663
BMgn001756	0.132126	0.00469394
BMgn001757	0.149507	0.159248
BMgn001758	0.798002	0.600465
BMgn001759	0.129508	0.775622
BMgn001760	0.175913	0.0956849
BMgn001761	0.0255804	0.0124991
BMgn001762	0.376513	0.197432
BMgn001763	0.0502588	0.0444614
BMgn001766	2.12131	2.59251
BMgn001767	0.962972	0.803769
BMgn001768	0.996841	1.81921
BMgn001769	0.332799	0.649888
BMgn001770	2.08289	1.50257
BMgn001771	0.133146	0.284774
BMgn001772	1.02684	1.24797
BMgn001773	1.56371	1.44413
BMgn001774	0.449551	0.466813
BMgn001775	0.543649	0.412772
BMgn001776	0.373742	0.0581458
BMgn001777	1.57971	1.20937
BMgn001778	0.050449	0.0334922
BMgn001779	0.0645078	0.0537246
BMgn001780	0.194547	0.473648
BMgn001781	0.0251154	0.129649
BMgn001782	0.147917	0.728577
BMgn001783	1.52159	1.15994
BMgn001784	0.0225919	0.0487985
BMgn001785	0.098351	0.466673
BMgn001786	0.412615	0.475305
BMgn001787	0.144675	0.128959
BMgn001788	2.01789	1.85505
BMgn001789	0.303897	0.229045
BMgn001790	0.0480072	0.169604
BMgn001791	0.12432	0.121317
BMgn001792	0.0334641	0.0559617
BMgn001794	1.06084	0.8146
BMgn001795	0.785898	0.855613
BMgn001796	0.814628	0.809248
BMgn001798	0.235055	0.180278
BMgn001799	1.31585	1.66115
BMgn001800	1.39095	0.797239
BMgn001801	0.672151	0.410944
BMgn001802	0.246961	0.510618
BMgn001803	0.0765125	0.125605
BMgn001804	0.689307	0.438326
BMgn001805	1.25731	1.05458
BMgn001806	1.0829	1.79183
BMgn001807	0.0702185	0.0095457
BMgn001808	0.419748	0.152754
BMgn001809	0.064256	0.1653
BMgn001810	0.413717	0.735891
BMgn001812	0.0200739	0.0779184
BMgn001813	0.274677	0.506849
BMgn001814	0.763538	0.959675
BMgn001815	0.656198	0.321564
BMgn001817	0.0432746	0.4344
BMgn001818	2.0959	1.57057
BMgn001819	0.764901	0.166502
BMgn001820	0.48402	0.132756
BMgn001821	0.0487839	0.0818648
BMgn001823	0.32981	0.253973
BMgn001824	0.274619	0.228207
BMgn001825	2.11325	2.21881
BMgn001826	1.33004	0.368434
BMgn001827	1.02848	0.848814
BMgn001828	0.0893489	0.48833
BMgn001829	0.98987	1.22592
BMgn001830	0.144275	0.330395
BMgn001831	0.0775652	0.0192515
BMgn001832	0.152027	0.829035
BMgn001833	0.554847	0.697907
BMgn001834	0.637141	0.805541
BMgn001835	2.02975	3.02822
BMgn001836	0.469327	1.16073
BMgn001837	0.354421	0.212717
BMgn001838	0.170548	0.0483711
BMgn001839	0.0252075	0.107377
BMgn001840	0.0734826	0.133346
BMgn001841	0.244972	0.161504
BMgn001842	0.1835	0.142282
BMgn001843	0.439627	0.518801
BMgn001844	0.302753	0.634026
BMgn001845	0.288041	0.530399
BMgn001847	0.199627	0.312792
BMgn001848	1.1242	0.971713
BMgn001849	0.809949	0.692697
BMgn001850	0.454903	0.374595
BMgn001851	0.231391	0.129936
BMgn001853	5.09474	3.43241
BMgn001854	0.484868	0.448416
BMgn001855	0.49205	0.628932
BMgn001856	1.09242	1.01004
BMgn001857	1.01586	0.28735
BMgn001858	0.522937	0.876279
BMgn001859	1.06695	0.676913
BMgn001860	0.275265	0.0962428
BMgn001861	1.02594	1.09974
BMgn001862	0.0537197	0.0998077
BMgn001863	0.0212217	0.0674603
BMgn001864	0.0104523	0.0582501
BMgn001865	0.0712458	0.0743734
BMgn001866	0.157778	0.717446
BMgn001867	0.481631	1.16304
BMgn001868	0.261449	0.232577
BMgn001869	0.331801	0.657933
BMgn001870	0.223902	0.163961
BMgn001871	0.237269	1.17739
BMgn001872	0.123095	0.0403434
BMgn001873	0.245705	0.622275
BMgn001876	0.590811	0.513173
BMgn001877	0.804045	0.309414
BMgn001878	1.17038	0.522242
BMgn001879	0.269848	0.0635667
BMgn001880	0.00475102	0.0470623
BMgn001881	1.92431	2.74536
BMgn001882	0.370274	0.64522
BMgn001883	0.140423	0.0627379
BMgn001885	1.34511	0.9613
BMgn001886	0.4245	0.498461
BMgn001887	1.36367	2.1274
BMgn001888	0.587422	0.336667
BMgn001889	0.798849	0.276306
BMgn001890	0.0549945	0.0461775
BMgn001891	0.39435	0.106632
BMgn001892	0.58306	0.54578
BMgn001893	0.0735855	0.0611252
BMgn001894	0.704587	0.849151
BMgn001896	0.636595	1.18697
BMgn001897	0.949504	1.07342
BMgn001898	1.87312	1.05869
BMgn001899	0.0924973	0.054
BMgn001900	0.361341	0.156917
BMgn001901	0.157347	0.626353
BMgn001903	0.861634	0.85633
BMgn001904	0.0220844	0.0133984
BMgn001905	0.27435	0.355384
BMgn001906	0.892281	0.349459
BMgn001907	0.00156628	0.137881
BMgn001908	0.312641	0.355079
BMgn001910	0.257196	0.446773
BMgn001911	0.146186	0.0844366
BMgn001912	0.0808905	0.0127405
BMgn001913	0.00236464	0.00237775
BMgn001914	0.36194	0.32673
BMgn001915	0.755006	1.01548
BMgn001916	1.13748	1.76794
BMgn001917	1.0312	0.734168
BMgn001918	0.611206	0.616346
BMgn001919	0.0917295	0.10978
BMgn001921	1.76657	1.61549
BMgn001922	0.384239	0.999219
BMgn001923	0.0509419	0.0244212
BMgn001924	0.484895	0.267277
BMgn001925	1.10196	0.771369
BMgn001926	0.708232	0.63311
BMgn001927	1.3035	0.943629
BMgn001929	0.174652	0.588431
BMgn001930	0.379271	1.1586
BMgn001931	1.19967	1.17536
BMgn001934	0.0367034	0.0142952
BMgn001936	0.255519	0.948577
BMgn001937	0.205582	0.304229
BMgn001938	0.264617	0.477517
BMgn001939	0.00334826	0.00309886
BMgn001940	1.21993	1.72386
BMgn001941	0.186679	0.168329
BMgn001942	0.302021	0.121432
BMgn001943	1.05396	0.797049
BMgn001944	0.033572	0.0617756
BMgn001945	0.529634	0.317485
BMgn001946	0.332052	0.409325
BMgn001948	0.512268	0.527756
BMgn001949	0.852107	0.563329
BMgn001950	1.89942	2.07819
BMgn001951	0.327958	0.471032
BMgn001952	0.515017	0.751953
BMgn001953	0.59736	0.918941
BMgn001955	1.07887	1.50685
BMgn001956	0.602373	1.45033
BMgn001958	0.158128	0.212873
BMgn001959	0.885923	0.961221
BMgn001960	0.172353	0.310522
BMgn001961	0.453556	0.293265
BMgn001962	1.80618	1.13609
BMgn001963	0.0114678	0.0101054
BMgn001964	0.001998	0.119124
BMgn001965	0.16317	0.240544
BMgn001966	0.990932	0.492616
BMgn001967	0.435074	0.410687
BMgn001968	0.316296	0.21174
BMgn001969	0.194472	0.315639
BMgn001970	0.204148	0.396737
BMgn001971	0.854493	1.16804
BMgn001972	0.626922	0.39894
BMgn001973	0.0515332	0.168022
BMgn001974	1.22579	1.24698
BMgn001975	1.04544	1.34575
BMgn001976	0.775234	0.509381
BMgn001977	0.948076	1.0041
BMgn001978	0.020734	0.0492555
BMgn001979	0.962693	0.563567
BMgn001980	0.904343	1.14804
BMgn001981	0.185619	0.210194
BMgn001982	0.848477	0.650684
BMgn001983	1.88349	1.05899
BMgn001984	0.213781	0.267285
BMgn001985	1.62938	1.84197
BMgn001986	0.00710201	0.00467199
BMgn001987	0.617155	0.959675
BMgn001988	0.105269	0.119089
BMgn001989	0.115363	0.246601
BMgn001990	0.0315077	0.0223678
BMgn001991	0.336723	0.355552
BMgn001992	0.659159	0.0728864
BMgn001993	0.742706	1.78532
BMgn001994	0.655509	1.06187
BMgn001995	0.0682168	0.0938051
BMgn001996	0.0193922	0.0337738
BMgn001997	0.0308405	0.0874326
BMgn001998	0.034502	0.166936
BMgn001999	0.044572	0.0736833
BMgn002000	0.00133098	0.049027
BMgn002001	0.0707702	0.027538
BMgn002002	1.12336	1.04457
BMgn002004	0.216111	0.0322883
BMgn002005	1.33885	1.51877
BMgn002006	0.621003	1.0961
BMgn002007	0.492009	0.0965573
BMgn002010	0.434979	0.34175
BMgn002011	0.416937	1.06846
BMgn002013	0.555627	0.713431
BMgn002014	0.800547	1.45189
BMgn002015	0.1045	0.0221713
BMgn002016	0.00264857	0.00303763
BMgn002017	0.636576	0.179332
BMgn002018	0.449686	0.77322
BMgn002019	0.214428	0.137219
BMgn002020	0.86694	0.878933
BMgn002021	0.0903103	0.226265
BMgn002022	0.120193	0.00353649
BMgn002023	0.158184	0.163144
BMgn002024	0.0331265	0.0219382
BMgn002025	0.100152	0.541196
BMgn002026	1.37229	0.885222
BMgn002029	0.909742	0.767716
BMgn002030	0.622949	0.289823
BMgn002031	0.206915	0.407757
BMgn002032	0.454174	0.264737
BMgn002033	0.0856304	0.00514197
BMgn002034	0.162128	0.217893
BMgn002035	0.0347795	0.0240171
BMgn002036	0.109942	0.0945711
BMgn002037	0.123482	0.0170191
BMgn002038	0.154071	0.742393
BMgn002039	0.450678	0.412884
BMgn002040	1.0131	0.749971
BMgn002041	1.19916	0.685501
BMgn002042	0.0885068	0.350743
BMgn002043	0.146606	0.198891
BMgn002044	0.142601	0.160918
BMgn002045	0.051861	0.0758241
BMgn002046	0.0307426	0.16455
BMgn002047	0.125182	0.0237051
BMgn002050	1.76754	1.61714
BMgn002051	0.735418	0.512819
BMgn002052	0.179785	0.0729223
BMgn002053	0.618398	0.77482
BMgn002054	0.0867532	0.184847
BMgn002057	0.174931	0.216468
BMgn002058	0.407235	0.296434
BMgn002060	0.640677	0.327025
BMgn002061	0.859052	0.394167
BMgn002062	0.326509	0.626206
BMgn002063	0.121093	0.201453
BMgn002064	0.831561	0.90946
BMgn002065	0.081325	0.129555
BMgn002066	0.189418	0.121576
BMgn002067	0.0279824	0.0453041
BMgn002068	1.02167	0.605531
BMgn002069	0.331251	0.458246
BMgn002070	0.0433706	0.0580465
BMgn002071	0.0254653	0.169431
BMgn002072	0.433115	0.517312
BMgn002073	0.0664419	1.40117
BMgn002075	1.58949	1.01335
BMgn002076	0.138848	0.223807
BMgn002078	0.0627279	0.0022424
BMgn002079	0.201232	1.16457
BMgn002080	0.16061	0.451328
BMgn002082	0.0195467	0.00181916
BMgn002083	0.310292	0.420125
BMgn002084	0.0300253	0.567801
BMgn002085	0.15331	0.145299
BMgn002086	0.386296	0.232347
BMgn002088	0.228207	0.218647
BMgn002089	0.565846	0.87867
BMgn002090	0.241482	0.16509
BMgn002091	0.302753	0.603679
BMgn002092	1.37136	0.897121
BMgn002093	0.281648	0.308591
BMgn002094	0.52909	0.570781
BMgn002095	1.50232	1.20549
BMgn002096	0.287729	0.39291
BMgn002097	0.55741	0.468036
BMgn002098	0.272906	0.20231
BMgn002099	0.428827	0.692697
BMgn002100	0.390182	0.284214
BMgn002101	0.0656581	0.0736781
BMgn002102	0.107382	0.0736833
BMgn002103	0.0902247	0.0174574
BMgn002104	0.436709	0.276815
BMgn002105	0.294153	0.213845
BMgn002106	0.764977	0.491336
BMgn002107	0.703796	1.13282
BMgn002108	0.0061363	0.000869459
BMgn002109	0.58296	0.63865
BMgn002111	1.06318	0.523806
BMgn002112	0.0342387	0.0534249
BMgn002114	0.828274	1.41973
BMgn002115	1.29872	0.922741
BMgn002116	0.167881	0.137481
BMgn002117	0.207076	0.318307
BMgn002118	0.633316	0.73919
BMgn002119	0.0690764	0.148002
BMgn002120	0.0209162	0.304282
BMgn002121	0.243432	0.209258
BMgn002122	1.58326	1.74523
BMgn002124	0.211097	0.022656
BMgn002127	0.307726	0.509676
BMgn002128	0.275609	0.225614
BMgn002130	0.114973	0.196939
BMgn002131	0.501152	0.636538
BMgn002132	1.12255	0.491336
BMgn002133	0.619138	0.0839147
BMgn002134	0.0368216	0.0134656
BMgn002135	0.441495	1.29725
BMgn002136	0.392395	0.142601
BMgn002137	0.231014	0.645892
BMgn002138	0.912751	0.0946089
BMgn002139	0.972773	0.743403
BMgn002140	0.0345208	0.00286273
BMgn002141	0.140088	0.105357
BMgn002142	0.677471	0.62162
BMgn002143	0.263524	0.0519638
BMgn002144	0.103727	0.0128121
BMgn002145	0.0373845	0.0190336
BMgn002146	0.304571	0.0327704
BMgn002147	0.2238	0.0638534
BMgn002148	0.970738	1.97634
BMgn002149	0.322138	0.402722
BMgn002150	0.187642	0.18014
BMgn002151	1.02797	0.447405
BMgn002152	0.298691	0.472925
BMgn002153	4.44612	2.3084
BMgn002157	1.21481	1.2098
BMgn002159	0.71314	0.644472
BMgn002160	0.198644	0.509929
BMgn002161	1.3884	0.861508
BMgn002162	0.887697	0.639142
BMgn002163	0.370917	0.152082
BMgn002164	2.25072	2.00344
BMgn002165	0.660191	1.49439
BMgn002168	1.69516	0.927934
BMgn002169	0.448916	0.352969
BMgn002170	0.503638	0.313185
BMgn002171	0.00896452	0.172133
BMgn002172	0.0866048	0.305825
BMgn002173	0.936629	0.380041
BMgn002174	0.222631	0.153057
BMgn002175	0.0276074	0.17434
BMgn002176	0.357704	0.301343
BMgn002177	0.108234	0.0462645
BMgn002178	0.211549	0.314187
BMgn002179	0.0748066	0.148167
BMgn002180	0.0706373	0.567287
BMgn002181	0.103523	0.414505
BMgn002182	0.111427	0.10795
BMgn002183	0.0158374	0.0774821
BMgn002184	0.91013	0.527302
BMgn002185	0.198445	0.326288
BMgn002186	0.293846	0.24398
BMgn002188	1.78317	1.72345
BMgn002189	0.407823	0.219236
BMgn002190	0.400237	0.831414
BMgn002192	0.532348	0.793687
BMgn002193	1.9575	2.93697
BMgn002194	2.95735	1.20154
BMgn002195	0.691073	0.769883
BMgn002196	0.596022	0.658387
BMgn002197	0.481433	1.01007
BMgn002198	0.430872	0.460522
BMgn002199	0.3358	0.943858
BMgn002200	0.311269	0.580953
BMgn002201	0.9426	1.02928
BMgn002202	0.420342	0.301986
BMgn002203	0.341369	0.452508
BMgn002205	0.824082	0.458284
BMgn002206	0.723768	0.580887
BMgn002207	0.916354	0.0667355
BMgn002208	2.37833	0.231821
BMgn002209	0.627383	1.30711
BMgn002210	0.386528	0.567688
BMgn002212	0.0189066	0.00121773
BMgn002213	0.210645	0.127139
BMgn002214	0.618325	0.566935
BMgn002215	2.38169	2.44855
BMgn002216	0.457909	0.0724038
BMgn002217	1.87524	0.679127
BMgn002218	1.70434	1.02624
BMgn002219	0.937644	0.651812
BMgn002220	1.36279	1.58273
BMgn002221	1.16713	1.09011
BMgn002222	0.459433	0.510928
BMgn002223	1.28701	1.73049
BMgn002224	1.04606	0.504137
BMgn002225	0.0475854	0.137708
BMgn002226	0.456603	0.250318
BMgn002227	0.0643718	0.146472
BMgn002228	0.108864	0.127191
BMgn002229	0.628452	0.191526
BMgn002230	0.848232	0.954403
BMgn002231	1.05397	1.17106
BMgn002232	0.0346995	0.0700041
BMgn002233	0.00423761	0.180206
BMgn002234	0.0539557	0.058419
BMgn002235	0.425483	0.213689
BMgn002236	3.02148	2.85437
BMgn002237	0.86544	0.176389
BMgn002238	0.693875	1.33799
BMgn002239	0.531727	0.276503
BMgn002241	1.95888	2.05984
BMgn002242	0.0178419	0.00255245
BMgn002243	1.0176	0.893367
BMgn002244	0.573375	0.795419
BMgn002246	0.370101	0.7795
BMgn002247	0.671315	0.789494
BMgn002249	0.360374	0.316737
[truncated: 13,978 more rows]
