# Supplementary material for: Genome-wide CRISPR screening reveals genes essential for cell viability and resistance to abiotic and biotic stresses in Bombyx mori
Source: HighWire-hosted journal article supplement (doi:10.1101/gr.249045.119), 2020-05-01
Supplement: Supplemental_Table_S4.xlsx.xlsx [file Supplemental_Table_S4.xlsx.xlsx]

## Sheet: Supplemental Table legend
Supplemental_Table_S4. Screening of essential or growth-restricting genes
Sheet1	Supplemental Table legend
Sheet2	essential genes rank
Sheet3	growth-restricting genes rank
Sheet4	sgRNA score

## Sheet: essential genes rank
Gene ID	neg|score	neg|p-value	neg|rank
BMgn007895	1.59e-07	9.3e-07	1
BMgn010154	2.45e-07	9.3e-07	2
BMgn010487	2.55e-07	9.3e-07	3
BMgn001043	7.31e-07	3.41e-06	4
BMgn016033	1.74e-06	4.03e-06	5
BMgn016162	1.83e-06	5.27e-06	6
BMgn001302	2.8e-06	1.12e-05	7
BMgn000898	5.43e-06	1.89e-05	8
BMgn013112	5.87e-06	2.01e-05	9
BMgn001853	8.04e-06	3.13e-05	10
BMgn007622	8.42e-06	2.82e-05	11
BMgn006045	1.08e-05	4.93e-05	12
BMgn010561	1.13e-05	4.99e-05	13
BMgn011620	1.33e-05	4.93e-05	14
BMgn006986	1.86e-05	6.29e-05	15
BMgn011615	2e-05	9.14e-05	16
BMgn003126	2.06e-05	7.1e-05	17
BMgn005994	2.06e-05	7.1e-05	18
BMgn010139	2.31e-05	0.00011002	19
BMgn001637	2.32e-05	7.9e-05	20
BMgn007974	2.88e-05	9.89e-05	21
BMgn015572	2.97e-05	0.00014908	22
BMgn007847	3.28e-05	5.8e-05	23
BMgn007845	3.45e-05	0.00011157	24
BMgn007510	3.55e-05	0.00016953	25
BMgn002153	3.58e-05	0.00011808	26
BMgn001522	3.83e-05	6.66e-05	27
BMgn003309	3.83e-05	0.00012676	28
BMgn007645	4.17e-05	0.00015156	29
BMgn014363	4.47e-05	0.00015775	30
BMgn002972	5.07e-05	0.00016457	31
BMgn007874	5.54e-05	0.00026065	32
BMgn013922	5.68e-05	0.00018317	33
BMgn008851	6.54e-05	0.00024019	34
BMgn006134	6.8e-05	0.00024825	35
BMgn010621	6.87e-05	0.00021974	36
BMgn008825	6.9e-05	0.00025445	37
BMgn012032	7.94e-05	0.00040632	38
BMgn003401	8.59e-05	0.00016333	39
BMgn006627	8.75e-05	0.00041252	40
BMgn014135	9.6e-05	0.00029846	41
BMgn002820	9.69e-05	0.00034929	42
BMgn008277	9.97e-05	0.0003152	43
BMgn012100	9.97e-05	0.0003152	44
BMgn010147	0.00010424	0.00037284	45
BMgn004698	0.00010683	0.00034061	46
BMgn016767	0.00011136	0.00020858	47
BMgn013680	0.00011284	0.00035859	48
BMgn004036	0.00011653	0.00036851	49
BMgn010797	0.00012414	0.00038772	50
BMgn010228	0.00012706	0.00039516	51
BMgn014412	0.00013204	0.00070013	52
BMgn011568	0.00013537	0.00050859	53
BMgn002755	0.00013659	0.00063938	54
BMgn005949	0.0001446	0.00067348	55
BMgn003186	0.0001467	0.00045281	56
BMgn005451	0.00015079	0.00070323	57
BMgn009795	0.00015463	0.00082658	58
BMgn007210	0.00015897	0.00048814	59
BMgn017489	0.00015989	0.00075034	60
BMgn002644	0.00016921	0.00051603	61
BMgn000786	0.00017454	0.00064248	62
BMgn004661	0.00018394	0.00056252	63
BMgn014984	0.00018665	0.0005681	64
BMgn010673	0.00019621	0.00039206	65
BMgn011133	0.00020293	0.00074538	66
BMgn003451	0.000205	0.0004057	67
BMgn013974	0.00021215	0.00077575	68
BMgn006414	0.0002163	0.00065674	69
BMgn012200	0.00021944	0.00079869	70
BMgn009458	0.00022145	0.00080551	71
BMgn007582	0.00022997	0.00069455	72
BMgn001501	0.00023696	0.00071377	73
BMgn009070	0.00024194	0.00088423	74
BMgn014403	0.00024502	0.00073484	75
BMgn012583	0.00025713	0.0009301	76
BMgn003350	0.00026846	0.00079807	77
BMgn011576	0.0002742	0.00099146	78
BMgn009980	0.00028788	0.00056314	79
BMgn011603	0.00029895	0.00087927	80
BMgn014122	0.00030025	0.001077	81
BMgn008525	0.00031194	0.00060963	82
BMgn010849	0.00031474	0.0014526	83
BMgn006828	0.000331	0.00064868	84
BMgn010751	0.00033423	0.00065116	85
BMgn005425	0.0003358	0.0012078	86
BMgn011416	0.00034292	0.0010225	87
BMgn005323	0.00034571	0.0012419	88
BMgn009534	0.00037721	0.0013491	89
BMgn002776	0.00042074	0.00080736	90
BMgn010702	0.00042349	0.0015146	91
BMgn013146	0.0004248	0.0015177	92
BMgn012004	0.00043013	0.001276	93
BMgn006867	0.00044591	0.00086067	94
BMgn013157	0.00044934	0.0013324	95
BMgn009662	0.00045567	0.0020905	96
BMgn003446	0.00048112	0.0017186	97
BMgn006611	0.00048713	0.0017347	98
BMgn014290	0.00048774	0.0022361	99
BMgn013100	0.00048971	0.0022417	100
BMgn013255	0.0004899	0.0014393	101
BMgn000800	0.0005053	0.0014824	102
BMgn006634	0.00051202	0.0014923	103
BMgn014423	0.00053848	0.0019219	104
BMgn004137	0.00054259	0.00054393	105
BMgn015145	0.00054596	0.001955	106
BMgn012397	0.00055369	0.0010534	107
BMgn006957	0.00056463	0.0016436	108
BMgn011827	0.00058538	0.002662	109
BMgn008714	0.00060302	0.0021618	110
BMgn001363	0.00063949	0.0018667	111
BMgn007230	0.00064333	0.0018779	112
BMgn009122	0.00065404	0.0019064	113
BMgn011117	0.00065599	0.0012413	114
BMgn006711	0.00066155	0.0023781	115
BMgn001106	0.0006726	0.0024147	116
BMgn002818	0.00067888	0.0019783	117
BMgn009170	0.00069652	0.0025002	118
BMgn006459	0.00069779	0.0025064	119
BMgn006140	0.0006984	0.0020266	120
BMgn011229	0.00074016	0.0021506	121
BMgn000074	0.00075529	0.0034424	122
BMgn011493	0.00075798	0.0027023	123
BMgn000513	0.00075875	0.003456	124
BMgn004857	0.00076386	0.0022157	125
BMgn010647	0.00079054	0.0040957	126
BMgn000362	0.00079602	0.0028448	127
BMgn013407	0.0008017	0.0036488	128
BMgn014829	0.00080466	0.0028752	129
BMgn004782	0.00080805	0.0041893	130
BMgn013792	0.00080834	0.00080613	131
BMgn009463	0.00080919	0.0028845	132
BMgn013621	0.00081763	0.0037114	133
BMgn013506	0.00083026	0.0023998	134
BMgn012625	0.00085026	0.0024525	135
BMgn009848	0.00086582	0.002494	136
BMgn015778	0.00087758	0.0039457	137
BMgn010376	0.00088291	0.0031554	138
BMgn012387	0.00089666	0.002587	139
BMgn003977	0.00089693	0.00089291	140
BMgn013025	0.00092409	0.0041447	141
BMgn002381	0.00092559	0.0026713	142
BMgn002236	0.00095174	0.0034114	143
BMgn004911	0.00095902	0.0043071	144
BMgn001243	0.00096591	0.0027878	145
BMgn011948	0.0009842	0.0028343	146
BMgn004165	0.00099146	0.0035329	147
BMgn004201	0.0009957	0.0035465	148
BMgn012224	0.0010043	0.0045172	149
BMgn005928	0.0010096	0.0029118	150
BMgn007460	0.001036	0.0037021	151
BMgn009855	0.0010447	0.0047057	152
BMgn004671	0.0010471	0.0037449	153
BMgn008842	0.0010692	0.0048197	154
BMgn003001	0.0010692	0.0048197	155
BMgn007676	0.0010794	0.0020527	156
BMgn007879	0.0010984	0.0020985	157
BMgn002194	0.0011032	0.0039606	158
BMgn014682	0.001127	0.0032632	159
BMgn014847	0.0011382	0.0032986	160
BMgn014414	0.0011772	0.0042339	161
BMgn001386	0.0011865	0.0053447	162
BMgn007661	0.0011905	0.0022758	163
BMgn003726	0.0011928	0.0022789	164
BMgn002811	0.001207	0.0011687	165
BMgn011417	0.0012284	0.0062398	166
BMgn006931	0.0012538	0.0036035	167
BMgn009817	0.0012705	0.0036525	168
BMgn012564	0.0013002	0.0046672	169
BMgn003997	0.0013217	0.0037951	170
BMgn011128	0.0013217	0.0047484	171
BMgn006044	0.0013286	0.0038093	172
BMgn006415	0.0013548	0.0068597	173
BMgn001183	0.0013589	0.0025969	174
BMgn007606	0.0013614	0.0038961	175
BMgn005488	0.0013633	0.004899	176
BMgn008336	0.0013724	0.0049238	177
BMgn013842	0.0013785	0.0026322	178
BMgn012610	0.0013828	0.0039407	179
BMgn008989	0.0013935	0.0039693	180
BMgn012851	0.0014016	0.0026694	181
BMgn002551	0.0014168	0.004025	182
BMgn009049	0.001425	0.0027147	183
BMgn003798	0.0014282	0.0040585	184
BMgn013678	0.001436	0.0051433	185
BMgn003362	0.00144	0.0027364	186
BMgn004612	0.0014504	0.0064419	187
BMgn000140	0.0014833	0.0028219	188
BMgn003004	0.0014995	0.0053732	189
BMgn013997	0.0015288	0.0067822	190
BMgn015823	0.0015446	0.0068491	191
BMgn005585	0.0015487	0.0068721	192
BMgn016049	0.0015566	0.0044348	193
BMgn017088	0.0015582	0.0055797	194
BMgn009373	0.0015624	0.0044614	195
BMgn012829	0.0016046	0.0070958	196
BMgn002401	0.0016167	0.0046108	197
BMgn003385	0.001641	0.0046809	198
BMgn001035	0.0016641	0.0059447	199
BMgn008881	0.0016734	0.0047757	200
BMgn003335	0.0016932	0.0048358	201
BMgn006638	0.0016966	0.0048439	202
BMgn010966	0.0016995	0.0048513	203
BMgn000399	0.0017006	0.0060712	204
BMgn006495	0.0017214	0.0061549	205
BMgn014972	0.0017341	0.0049437	206
BMgn005594	0.0017506	0.0049821	207
BMgn002460	0.0017595	0.0077554	208
BMgn014805	0.0017689	0.005046	209
BMgn000154	0.0017778	0.0050664	210
BMgn000412	0.0018077	0.0051464	211
BMgn012131	0.0018245	0.0080454	212
BMgn012414	0.0018373	0.0035484	213
BMgn002481	0.0018514	0.0052697	214
BMgn000771	0.001893	0.0067617	215
BMgn006014	0.0018948	0.0053819	216
BMgn016982	0.0019129	0.0068395	217
BMgn013898	0.0019195	0.0068609	218
BMgn013624	0.0019258	0.0037275	219
BMgn004890	0.0019363	0.0085122	220
BMgn004273	0.0019586	0.0055753	221
BMgn005288	0.0019615	0.0070097	222
BMgn016120	0.0019701	0.0038261	223
BMgn016368	0.0019912	0.0056429	224
BMgn007293	0.0020112	0.0088289	225
BMgn007987	0.0020139	0.00719	226
BMgn009863	0.002025	0.0057458	227
BMgn012793	0.002053	0.0073264	228
BMgn009189	0.0020541	0.0039947	229
BMgn005177	0.0021071	0.005954	230
BMgn001137	0.0021106	0.0059615	231
BMgn009999	0.0021577	0.0060879	232
BMgn005126	0.0021681	0.0042147	233
BMgn011755	0.002178	0.007777	234
BMgn007205	0.0021945	0.0061865	235
BMgn006489	0.0022163	0.0096893	236
BMgn004892	0.0022263	0.0062807	237
BMgn010867	0.002237	0.0063123	238
BMgn000955	0.0022656	0.0063811	239
BMgn012520	0.0022788	0.0044242	240
BMgn010541	0.0023106	0.0044831	241
BMgn010619	0.0023106	0.0082457	242
BMgn003608	0.0023257	0.0065584	243
BMgn013250	0.00234	0.011543	244
BMgn007459	0.0023455	0.0083672	245
BMgn004356	0.0023856	0.010399	246
BMgn010499	0.0023923	0.010423	247
BMgn010693	0.0024557	0.012108	248
BMgn011131	0.0024854	0.012252	249
BMgn007583	0.0024856	0.006988	250
BMgn010576	0.002489	0.010817	251
BMgn016937	0.0024892	0.0069985	252
BMgn005503	0.0024941	0.0070128	253
BMgn009294	0.0024995	0.0088928	254
BMgn007637	0.0024996	0.010861	255
BMgn008472	0.0025014	0.0070332	256
BMgn010068	0.0025088	0.010904	257
BMgn001250	0.0025176	0.0089579	258
BMgn009182	0.0025232	0.0070964	259
BMgn010474	0.0025655	0.011153	260
BMgn004041	0.0025669	0.0072124	261
BMgn005217	0.0025726	0.0072341	262
BMgn010396	0.0025747	0.011197	263
BMgn017240	0.002581	0.011227	264
BMgn012696	0.0026246	0.0073779	265
BMgn010711	0.0026262	0.0073859	266
BMgn003985	0.0026582	0.0094091	267
BMgn010216	0.002737	0.0096912	268
BMgn010571	0.0027433	0.0077113	269
BMgn004516	0.0027537	0.0052927	270
BMgn001509	0.002763	0.0053094	271
BMgn002837	0.0027786	0.0078049	272
BMgn003704	0.002784	0.0053546	273
BMgn015139	0.0027875	0.0098691	274
BMgn012370	0.002791	0.0053708	275
BMgn009430	0.0028024	0.0078719	276
BMgn007871	0.0028083	0.013832	277
BMgn008910	0.0028331	0.012264	278
BMgn005834	0.0028336	0.010054	279
BMgn002656	0.0028783	0.0055201	280
BMgn004905	0.0029415	0.014423	281
BMgn006297	0.002994	0.012901	282
BMgn003815	0.0030085	0.0084471	283
BMgn000542	0.0030141	0.0084589	284
BMgn007495	0.0030199	0.0084756	285
BMgn003978	0.0030324	0.0058059	286
BMgn006845	0.0030527	0.010803	287
BMgn013413	0.0030709	0.0086095	288
BMgn003627	0.0030715	0.0058691	289
BMgn001282	0.0031202	0.0059677	290
BMgn010273	0.0031288	0.011054	291
BMgn010227	0.0031411	0.011098	292
BMgn009262	0.003183	0.0060879	293
BMgn000483	0.0032044	0.011319	294
BMgn013477	0.0032087	0.0061344	295
BMgn012683	0.0032141	0.013787	296
BMgn014789	0.0032691	0.0091451	297
BMgn004758	0.0032851	0.0091854	298
BMgn004845	0.0032867	0.0091909	299
BMgn004745	0.0032909	0.0092002	300
BMgn015512	0.0033398	0.0093273	301
BMgn006848	0.0033514	0.0093546	302
BMgn005377	0.0033651	0.009393	303
BMgn009559	0.0033855	0.0064704	304
BMgn001395	0.0033995	0.0033736	305
BMgn011973	0.0034037	0.0094879	306
BMgn007613	0.0034054	0.0064983	307
BMgn009911	0.0034079	0.014537	308
BMgn012470	0.0034168	0.0095151	309
BMgn015444	0.0034532	0.009623	310
BMgn008924	0.0034532	0.009623	311
BMgn006108	0.0034586	0.006599	312
BMgn005582	0.0034828	0.0096992	313
BMgn016240	0.0035017	0.0066836	314
BMgn014174	0.0035094	0.0097767	315
BMgn004573	0.0035361	0.009853	316
BMgn002687	0.0035503	0.0098901	317
BMgn006222	0.0035754	0.015212	318
BMgn013511	0.0036066	0.0068851	319
BMgn003578	0.0036431	0.012772	320
BMgn011307	0.0036664	0.010193	321
BMgn009532	0.0036788	0.010225	322
BMgn006497	0.0037127	0.015771	323
BMgn003196	0.0037159	0.0071113	324
BMgn003412	0.0037193	0.013025	325
BMgn007222	0.0037393	0.010398	326
BMgn015067	0.0037401	0.013089	327
BMgn016014	0.0037516	0.015918	328
BMgn007669	0.0037596	0.013149	329
BMgn015813	0.003813	0.010605	330
BMgn003758	0.0038192	0.0072979	331
BMgn006613	0.0038209	0.016193	332
BMgn000853	0.0038277	0.0073153	333
BMgn002340	0.0039146	0.013674	334
BMgn007973	0.0039537	0.011002	335
BMgn008433	0.0039684	0.0075793	336
BMgn005450	0.0040736	0.014204	337
BMgn011448	0.0040805	0.011358	338
BMgn016988	0.004086	0.0040424	339
BMgn006778	0.0040958	0.011401	340
BMgn012917	0.0041138	0.014348	341
BMgn011476	0.0041262	0.0078849	342
BMgn000348	0.0041521	0.011542	343
BMgn002215	0.0041525	0.0041112	344
BMgn002208	0.0041848	0.011623	345
BMgn010142	0.0041963	0.014639	346
BMgn011745	0.0042012	0.014651	347
BMgn012918	0.0042438	0.011794	348
BMgn002582	0.0042887	0.014939	349
BMgn007938	0.0042895	0.014944	350
BMgn005061	0.0043103	0.011982	351
BMgn009883	0.0043132	0.0082401	352
BMgn005452	0.004358	0.012107	353
BMgn001062	0.0043669	0.012126	354
BMgn012772	0.004374	0.018383	355
BMgn015491	0.0043918	0.012198	356
BMgn013566	0.004417	0.012278	357
BMgn013801	0.0044407	0.0084638	358
BMgn010723	0.0044732	0.018786	359
BMgn006687	0.0044768	0.012449	360
BMgn013166	0.0044955	0.0085767	361
BMgn008596	0.0045105	0.0157	362
BMgn007263	0.0045249	0.012579	363
BMgn010933	0.0045282	0.00863	364
BMgn012795	0.004566	0.01917	365
BMgn014094	0.0045687	0.012698	366
BMgn017077	0.0046048	0.015995	367
BMgn000323	0.0046181	0.0087707	368
BMgn010874	0.0046232	0.0087812	369
BMgn015943	0.0046473	0.016154	370
BMgn013896	0.0046483	0.012916	371
BMgn007381	0.0046533	0.012926	372
BMgn005619	0.0046573	0.008842	373
BMgn005840	0.0047118	0.019779	374
BMgn003668	0.0047179	0.008969	375
BMgn008549	0.0047352	0.013138	376
BMgn001478	0.0047409	0.013149	377
BMgn011650	0.0047558	0.0090316	378
BMgn005167	0.0047597	0.013208	379
BMgn008665	0.00476	0.019961	380
BMgn007796	0.004788	0.013268	381
BMgn014600	0.004815	0.016738	382
BMgn010864	0.0048611	0.0047955	383
BMgn013939	0.0048764	0.016944	384
BMgn014537	0.00489	0.016996	385
BMgn003961	0.0049007	0.0093255	386
BMgn006411	0.0049075	0.017054	387
BMgn012005	0.0049116	0.017067	388
BMgn000925	0.0049364	0.0093887	389
BMgn013150	0.0049395	0.0093967	390
BMgn005664	0.005003	0.020949	391
BMgn016960	0.0050112	0.013876	392
BMgn016002	0.0050429	0.013955	393
BMgn006813	0.0050736	0.017577	394
BMgn015754	0.0050912	0.017651	395
BMgn000177	0.0051715	0.014316	396
BMgn007658	0.0052064	0.01442	397
BMgn009425	0.0052153	0.021759	398
BMgn001425	0.0052461	0.014522	399
BMgn003974	0.0052525	0.0099862	400
BMgn013063	0.0052608	0.018207	401
BMgn005570	0.0052654	0.01001	402
BMgn004696	0.0052726	0.014584	403
BMgn010964	0.0052893	0.014633	404
BMgn000204	0.0053062	0.018346	405
BMgn004962	0.0053129	0.018367	406
BMgn016159	0.0053189	0.018378	407
BMgn006854	0.0053214	0.01839	408
BMgn003337	0.005325	0.014738	409
BMgn000767	0.005337	0.018447	410
BMgn008783	0.0054091	0.018679	411
BMgn014398	0.0054185	0.010286	412
BMgn006103	0.005424	0.010291	413
BMgn004963	0.0054627	0.010364	414
BMgn007594	0.0054712	0.015127	415
BMgn007490	0.0054745	0.022789	416
BMgn003474	0.0054927	0.010423	417
BMgn007169	0.0055291	0.015282	418
BMgn004513	0.0055917	0.0106	419
BMgn012517	0.0056082	0.010636	420
BMgn002164	0.0056141	0.0055809	421
BMgn004874	0.0056169	0.019384	422
BMgn009835	0.0056394	0.010692	423
BMgn003580	0.005641	0.019466	424
BMgn012039	0.0056424	0.01947	425
BMgn002973	0.0056835	0.010782	426
BMgn010931	0.0056918	0.019655	427
BMgn016638	0.0057051	0.023693	428
BMgn007988	0.0057146	0.015755	429
BMgn000985	0.0058022	0.015993	430
BMgn005650	0.0058418	0.02016	431
BMgn005089	0.0058462	0.011099	432
BMgn011071	0.0058602	0.011124	433
BMgn012356	0.0058748	0.020269	434
BMgn003197	0.0059044	0.011196	435
BMgn015408	0.0059267	0.020443	436
BMgn002829	0.0059414	0.01126	437
BMgn005659	0.0059773	0.01133	438
BMgn012681	0.0060368	0.011437	439
BMgn005605	0.0060516	0.016625	440
BMgn011735	0.006081	0.011507	441
BMgn008116	0.00609	0.020963	442
BMgn010791	0.0061252	0.011581	443
BMgn002594	0.0061636	0.021202	444
BMgn008361	0.0061675	0.025498	445
BMgn008275	0.0061853	0.025558	446
BMgn005825	0.0062074	0.017054	447
BMgn007741	0.0062135	0.01176	448
BMgn004873	0.0062259	0.01711	449
BMgn009664	0.0062312	0.02141	450
BMgn017141	0.0062564	0.0062119	451
BMgn016489	0.0062577	0.025829	452
BMgn008014	0.0062654	0.017211	453
BMgn006772	0.0062772	0.011877	454
BMgn015984	0.0062976	0.017288	455
BMgn007114	0.0063315	0.017382	456
BMgn012689	0.0063677	0.026222	457
BMgn011995	0.0063977	0.017577	458
BMgn007477	0.0064292	0.02644	459
BMgn008335	0.0064342	0.012146	460
BMgn013451	0.0064358	0.026465	461
BMgn016482	0.0064952	0.022274	462
BMgn013222	0.0064991	0.017821	463
BMgn013180	0.0065285	0.017899	464
BMgn006141	0.0065288	0.012329	465
BMgn006752	0.0065833	0.022548	466
BMgn016330	0.0065886	0.0065497	467
BMgn017373	0.0066222	0.012516	468
BMgn011155	0.0066329	0.00659	469
BMgn002346	0.006643	0.018204	470
BMgn010628	0.0066718	0.018281	471
BMgn007310	0.0066733	0.018282	472
BMgn007603	0.0066885	0.022858	473
BMgn007334	0.0066979	0.027489	474
BMgn013902	0.0067419	0.027634	475
BMgn010057	0.0067879	0.0067487	476
BMgn016814	0.0067998	0.018625	477
BMgn011924	0.006838	0.018729	478
BMgn012759	0.0068528	0.028043	479
BMgn007481	0.0068544	0.023383	480
BMgn007539	0.0068659	0.023413	481
BMgn009298	0.0069016	0.028231	482
BMgn002360	0.0069054	0.028246	483
BMgn007954	0.0069342	0.018999	484
BMgn016289	0.0069559	0.032082	485
BMgn015553	0.0069822	0.023787	486
BMgn002363	0.0070512	0.019282	487
BMgn015618	0.0070591	0.019305	488
BMgn013827	0.007065	0.032551	489
BMgn009504	0.0070993	0.024158	490
BMgn005151	0.0071065	0.024186	491
BMgn011184	0.0071096	0.019435	492
BMgn013496	0.007143	0.024312	493
BMgn014483	0.0071779	0.029254	494
BMgn007940	0.0071846	0.013511	495
BMgn013955	0.0071965	0.013524	496
BMgn005776	0.0071987	0.029337	497
BMgn004477	0.0072126	0.029384	498
BMgn007527	0.0072298	0.01977	499
BMgn013027	0.0072431	0.019799	500
BMgn011978	0.0072575	0.019836	501
BMgn010519	0.0073215	0.029764	502
BMgn008521	0.0073236	0.02	503
BMgn011089	0.0073764	0.025071	504
BMgn011631	0.0073858	0.020151	505
BMgn010868	0.0073897	0.020168	506
BMgn000844	0.0073933	0.020175	507
BMgn003699	0.0074393	0.020304	508
BMgn006328	0.0074542	0.013997	509
BMgn007431	0.0074645	0.025367	510
BMgn010815	0.0074919	0.030367	511
BMgn014455	0.0075377	0.01416	512
BMgn011250	0.0075526	0.025645	513
BMgn001766	0.007563	0.0075006	514
BMgn007780	0.0076041	0.014289	515
BMgn004577	0.0076581	0.02087	516
BMgn015732	0.0076722	0.031044	517
BMgn014732	0.0076833	0.026068	518
BMgn001825	0.0077046	0.026133	519
BMgn005622	0.0077399	0.014543	520
BMgn014399	0.0077483	0.035517	521
BMgn010593	0.0077751	0.021175	522
BMgn001638	0.0078144	0.021304	523
BMgn014508	0.0078268	0.02654	524
BMgn003923	0.0078288	0.0077708	525
BMgn013534	0.0078478	0.026611	526
BMgn009895	0.0078602	0.021423	527
BMgn012734	0.0078857	0.026735	528
BMgn015519	0.0079173	0.0078613	529
BMgn012295	0.0079409	0.02164	530
BMgn002931	0.0079478	0.014912	531
BMgn016194	0.0079641	0.026969	532
BMgn000813	0.0079873	0.014988	533
BMgn008016	0.0080144	0.027127	534
BMgn001818	0.0080186	0.032357	535
BMgn005601	0.008081	0.02733	536
BMgn012842	0.0081545	0.015292	537
BMgn007842	0.0081824	0.027648	538
BMgn005755	0.0082256	0.027777	539
BMgn008283	0.0082489	0.022448	540
BMgn001770	0.0082625	0.022486	541
BMgn005388	0.0082815	0.022536	542
BMgn008209	0.0082935	0.027999	543
BMgn007424	0.0082986	0.028019	544
BMgn014803	0.0083102	0.03346	545
BMgn011581	0.008315	0.022615	546
BMgn014143	0.0083262	0.033518	547
BMgn006010	0.0083324	0.033543	548
BMgn002790	0.008381	0.022795	549
BMgn007524	0.0084072	0.022863	550
BMgn013230	0.00842	0.015804	551
BMgn001699	0.0084409	0.015844	552
BMgn000852	0.0084878	0.015948	553
BMgn000980	0.0084878	0.015948	554
BMgn016629	0.0085675	0.016097	555
BMgn005930	0.0086405	0.016229	556
BMgn016877	0.0086703	0.0086225	557
BMgn008922	0.0086972	0.029253	558
BMgn000706	0.0087425	0.023707	559
BMgn006102	0.0087425	0.023707	560
BMgn000843	0.008788	0.029559	561
BMgn013053	0.0088169	0.016569	562
BMgn009372	0.0088319	0.016603	563
BMgn007503	0.0088363	0.029719	564
BMgn006834	0.0088451	0.029759	565
BMgn001252	0.0088475	0.0087918	566
BMgn017416	0.0089229	0.024187	567
BMgn001471	0.0089632	0.030112	568
BMgn006258	0.0090374	0.01697	569
BMgn003767	0.0090521	0.024532	570
BMgn002960	0.009075	0.017044	571
BMgn005519	0.0090911	0.009036	572
BMgn009845	0.0091088	0.03057	573
BMgn016893	0.0091099	0.041111	574
BMgn011498	0.0091716	0.041362	575
BMgn013527	0.0092056	0.030878	576
BMgn001166	0.0092117	0.024942	577
BMgn006158	0.0093131	0.031232	578
BMgn001835	0.0093379	0.031304	579
BMgn005817	0.0093536	0.037278	580
BMgn007318	0.0093644	0.031384	581
BMgn007221	0.0093792	0.025384	582
BMgn012960	0.0093901	0.017622	583
BMgn012244	0.0094342	0.017706	584
BMgn015729	0.0094623	0.03768	585
BMgn009751	0.0094892	0.025658	586
BMgn001523	0.0095038	0.025695	587
BMgn011663	0.0095178	0.037879	588
BMgn012886	0.009551	0.037986	589
BMgn001788	0.0095965	0.02592	590
BMgn007017	0.0095973	0.025922	591
BMgn006180	0.0096058	0.018041	592
BMgn010156	0.009607	0.043115	593
BMgn001460	0.0096259	0.0322	594
BMgn007644	0.0096275	0.018089	595
BMgn016852	0.0096446	0.026049	596
BMgn015990	0.0096797	0.018189	597
BMgn001257	0.0097018	0.026207	598
BMgn013503	0.0097334	0.0096775	599
BMgn000726	0.0097495	0.026332	600
BMgn011810	0.0097496	0.018336	601
BMgn011936	0.0097758	0.01838	602
BMgn013524	0.0097932	0.026456	603
BMgn003986	0.0098078	0.026487	604
BMgn005268	0.0098432	0.044094	605
BMgn007835	0.009904	0.039262	606
BMgn000253	0.0099288	0.026784	607
BMgn004723	0.0099584	0.018712	608
BMgn016357	0.010057	0.027106	609
BMgn013055	0.010098	0.027215	610
BMgn012120	0.010192	0.033951	611
BMgn013508	0.0102	0.033974	612
BMgn003705	0.010269	0.034174	613
BMgn008503	0.010288	0.027696	614
BMgn014415	0.010296	0.027721	615
BMgn006851	0.010317	0.019383	616
BMgn014572	0.010428	0.028064	617
BMgn012038	0.010448	0.019618	618
BMgn012487	0.010492	0.019711	619
BMgn009173	0.010766	0.028935	620
BMgn005943	0.010817	0.029064	621
BMgn000839	0.010824	0.029084	622
BMgn008010	0.010844	0.020413	623
BMgn008542	0.010855	0.029157	624
BMgn008990	0.010932	0.020555	625
BMgn007466	0.01097	0.029467	626
BMgn003200	0.010978	0.029491	627
BMgn008022	0.010984	0.043133	628
BMgn002241	0.010993	0.029533	629
BMgn007615	0.010994	0.02066	630
BMgn015807	0.011013	0.036487	631
BMgn003361	0.011018	0.010945	632
BMgn002808	0.011021	0.029601	633
BMgn002193	0.011028	0.043294	634
BMgn002763	0.01104	0.029639	635
BMgn010824	0.011042	0.036579	636
BMgn008119	0.011047	0.02966	637
BMgn008569	0.011079	0.043491	638
BMgn009831	0.011153	0.029905	639
BMgn000272	0.01116	0.029925	640
BMgn009917	0.011173	0.011097	641
BMgn007773	0.011188	0.037044	642
BMgn008609	0.011195	0.037062	643
BMgn002359	0.011219	0.030074	644
BMgn007718	0.011234	0.030109	645
BMgn016645	0.011258	0.021172	646
BMgn003777	0.01128	0.030208	647
BMgn003183	0.011283	0.030218	648
BMgn004610	0.011289	0.037354	649
BMgn010878	0.011297	0.037378	650
BMgn011514	0.011297	0.037378	651
BMgn011178	0.011329	0.021305	652
BMgn014539	0.011357	0.044463	653
BMgn009619	0.0114	0.030511	654
BMgn008932	0.011417	0.030557	655
BMgn017326	0.011423	0.037743	656
BMgn006640	0.011427	0.030583	657
BMgn008548	0.011437	0.030605	658
BMgn014378	0.011593	0.030978	659
BMgn015544	0.011631	0.038359	660
BMgn011282	0.011637	0.031091	661
BMgn007194	0.011658	0.031139	662
BMgn005107	0.011681	0.038496	663
BMgn012775	0.011681	0.021993	664
BMgn008510	0.011753	0.031368	665
BMgn007782	0.011764	0.022147	666
BMgn008088	0.011776	0.031425	667
BMgn012371	0.011812	0.022243	668
BMgn009228	0.011826	0.03893	669
BMgn001881	0.011904	0.022398	670
BMgn003377	0.011913	0.03178	671
BMgn014826	0.011928	0.022443	672
BMgn017167	0.012029	0.039558	673
BMgn000463	0.012036	0.039577	674
BMgn003009	0.012045	0.032098	675
BMgn012001	0.012054	0.039625	676
BMgn007870	0.012077	0.022723	677
BMgn001283	0.012081	0.032193	678
BMgn009126	0.012142	0.032338	679
BMgn006607	0.012147	0.01205	680
BMgn004368	0.012247	0.04022	681
BMgn015045	0.012294	0.040358	682
BMgn007080	0.012298	0.023135	683
BMgn010200	0.01243	0.040752	684
BMgn004517	0.012447	0.033089	685
BMgn003642	0.01248	0.012386	686
BMgn012893	0.012508	0.033236	687
BMgn001950	0.012606	0.023703	688
BMgn011618	0.01263	0.033533	689
BMgn011819	0.012634	0.033546	690
BMgn004558	0.01264	0.041407	691
BMgn002978	0.01265	0.049131	692
BMgn004128	0.012654	0.049143	693
BMgn005111	0.012679	0.012583	694
BMgn009963	0.012685	0.033678	695
BMgn008302	0.012694	0.023877	696
BMgn011467	0.012701	0.033726	697
BMgn006523	0.012784	0.033941	698
BMgn015142	0.012802	0.041908	699
BMgn001318	0.01284	0.034089	700
BMgn006056	0.012849	0.049845	701
BMgn002768	0.012862	0.04209	702
BMgn016878	0.01298	0.042444	703
BMgn017073	0.013016	0.034507	704
BMgn006630	0.013026	0.042585	705
BMgn006945	0.013031	0.024469	706
BMgn012672	0.013059	0.03462	707
BMgn003712	0.013064	0.034629	708
BMgn014402	0.013075	0.034655	709
BMgn001983	0.013077	0.024557	710
BMgn013134	0.013102	0.024598	711
BMgn006370	0.013134	0.03479	712
BMgn011558	0.013145	0.034815	713
BMgn010668	0.013178	0.024735	714
BMgn016116	0.013262	0.035106	715
BMgn013251	0.013266	0.043328	716
BMgn009208	0.013272	0.051367	717
BMgn013854	0.013295	0.024935	718
BMgn012525	0.013305	0.043458	719
BMgn002217	0.013328	0.035273	720
BMgn002963	0.013383	0.035409	721
BMgn003418	0.013387	0.035418	722
BMgn001898	0.013393	0.025108	723
BMgn008558	0.013428	0.051892	724
BMgn013200	0.013433	0.043845	725
BMgn011169	0.013461	0.043917	726
BMgn003892	0.013486	0.025273	727
BMgn001190	0.01351	0.044072	728
BMgn015420	0.013532	0.044143	729
BMgn010802	0.013541	0.03578	730
BMgn003480	0.013542	0.025376	731
BMgn004785	0.013659	0.04453	732
BMgn012882	0.013659	0.036079	733
BMgn017535	0.0137	0.052861	734
BMgn011823	0.013704	0.052875	735
BMgn004786	0.013712	0.036224	736
BMgn012514	0.01373	0.04475	737
BMgn000174	0.013742	0.013607	738
BMgn012776	0.01375	0.02575	739
BMgn011624	0.013804	0.059978	740
BMgn006515	0.013822	0.036492	741
BMgn007581	0.013858	0.04515	742
BMgn000394	0.013882	0.036656	743
BMgn010827	0.013926	0.026054	744
BMgn011584	0.013963	0.013838	745
BMgn001009	0.014092	0.03717	746
BMgn003172	0.0141	0.045874	747
BMgn000201	0.014145	0.026458	748
BMgn012700	0.014184	0.037396	749
BMgn003267	0.014207	0.014083	750
BMgn004915	0.014258	0.046356	751
BMgn003062	0.014325	0.037755	752
BMgn016609	0.01433	0.046597	753
BMgn004665	0.014377	0.037874	754
BMgn000518	0.014409	0.026957	755
BMgn000678	0.014416	0.026972	756
BMgn003604	0.01444	0.038023	757
BMgn002377	0.014485	0.027073	758
BMgn005031	0.014544	0.03829	759
BMgn003555	0.014547	0.055851	760
BMgn007082	0.01456	0.027198	761
BMgn010246	0.014561	0.014434	762
BMgn016922	0.01457	0.038354	763
BMgn002466	0.014624	0.027311	764
BMgn002487	0.014628	0.014502	765
BMgn011747	0.014641	0.038544	766
BMgn004655	0.014707	0.047748	767
BMgn010884	0.01472	0.047792	768
BMgn015751	0.01474	0.056528	769
BMgn008633	0.014748	0.056554	770
BMgn011353	0.014776	0.038876	771
BMgn011191	0.014781	0.047976	772
BMgn009888	0.014842	0.03904	773
BMgn001361	0.014876	0.048297	774
BMgn002991	0.014907	0.03919	775
BMgn003607	0.014954	0.048534	776
BMgn005483	0.014969	0.027944	777
BMgn010260	0.015012	0.028032	778
BMgn004510	0.015025	0.028051	779
BMgn001142	0.015039	0.039516	780
BMgn000930	0.015067	0.028135	781
BMgn003294	0.015137	0.015042	782
BMgn004936	0.01514	0.0491	783
BMgn014998	0.015143	0.028259	784
BMgn009296	0.015151	0.06515	785
BMgn007963	0.015169	0.039864	786
BMgn016614	0.015221	0.06541	787
BMgn011976	0.015229	0.040012	788
BMgn006579	0.015247	0.04006	789
BMgn012560	0.015255	0.04946	790
BMgn013420	0.015261	0.049477	791
BMgn000360	0.01529	0.028539	792
BMgn009968	0.015302	0.04017	793
BMgn011175	0.015348	0.040295	794
BMgn006561	0.015374	0.040361	795
BMgn000909	0.015381	0.015285	796
BMgn004818	0.015469	0.015376	797
BMgn017553	0.015494	0.028909	798
BMgn002968	0.015508	0.028941	799
BMgn004315	0.015536	0.015443	800
BMgn006210	0.015544	0.050368	801
BMgn002844	0.015571	0.059376	802
BMgn001962	0.015625	0.040965	803
BMgn008854	0.015629	0.040976	804
BMgn003284	0.015653	0.059637	805
BMgn012693	0.015679	0.041119	806
BMgn003744	0.015726	0.029348	807
BMgn014699	0.015771	0.041319	808
BMgn001628	0.015783	0.041351	809
BMgn010171	0.015793	0.029453	810
BMgn010907	0.015807	0.051149	811
BMgn001486	0.015849	0.02955	812
BMgn005344	0.01586	0.029567	813
BMgn001654	0.015877	0.029598	814
BMgn010173	0.015924	0.029695	815
BMgn013433	0.01593	0.041721	816
BMgn005306	0.015994	0.029819	817
BMgn008047	0.016006	0.041908	818
BMgn005550	0.016025	0.041952	819
BMgn009859	0.016028	0.029874	820
BMgn003725	0.016129	0.052146	821
BMgn016733	0.016157	0.04228	822
BMgn007522	0.016162	0.052244	823
BMgn005347	0.016167	0.030125	824
BMgn009468	0.016178	0.016078	825
BMgn011662	0.016244	0.016149	826
BMgn005210	0.016246	0.06172	827
BMgn010352	0.016264	0.052567	828
BMgn013340	0.016299	0.030346	829
BMgn006706	0.016313	0.042689	830
BMgn004711	0.016349	0.030442	831
BMgn005634	0.016366	0.03047	832
BMgn002923	0.016402	0.042922	833
BMgn012903	0.016406	0.052966	834
BMgn002707	0.016431	0.030583	835
BMgn016587	0.016449	0.043039	836
BMgn010150	0.016457	0.030629	837
BMgn004274	0.016457	0.053122	838
BMgn001423	0.016462	0.043072	839
BMgn002188	0.016475	0.030654	840
BMgn007896	0.016485	0.043129	841
BMgn012126	0.016511	0.062613	842
BMgn016150	0.016563	0.030809	843
BMgn012474	0.016599	0.030872	844
BMgn006708	0.0166	0.053531	845
BMgn003378	0.016626	0.04345	846
BMgn004738	0.016633	0.030925	847
BMgn008720	0.016704	0.043642	848
BMgn010234	0.01671	0.043656	849
BMgn011793	0.016739	0.031111	850
BMgn016332	0.01676	0.043788	851
BMgn008785	0.016814	0.043896	852
BMgn005234	0.016877	0.031372	853
BMgn009335	0.0169	0.044104	854
BMgn011446	0.016918	0.044147	855
BMgn015461	0.016944	0.054582	856
BMgn008015	0.016987	0.054711	857
BMgn005882	0.017008	0.044362	858
BMgn010365	0.017046	0.031684	859
BMgn002050	0.017079	0.044516	860
BMgn015066	0.017105	0.064636	861
BMgn001921	0.017117	0.03181	862
BMgn014277	0.017119	0.055099	863
BMgn003652	0.017142	0.044694	864
BMgn000989	0.017182	0.064933	865
BMgn011450	0.017184	0.044792	866
BMgn012638	0.017203	0.044842	867
BMgn006412	0.017212	0.044861	868
BMgn017310	0.017233	0.032038	869
BMgn006975	0.017285	0.055586	870
BMgn008739	0.017293	0.055611	871
BMgn016856	0.017368	0.065571	872
BMgn007018	0.017426	0.056005	873
BMgn000754	0.017441	0.032415	874
BMgn006643	0.017485	0.056176	875
BMgn008295	0.017508	0.056254	876
BMgn016763	0.017559	0.0564	877
BMgn016604	0.017573	0.032641	878
BMgn005290	0.017574	0.032644	879
BMgn001644	0.017638	0.056643	880
BMgn004434	0.017656	0.066514	881
BMgn016454	0.017661	0.032803	882
BMgn006335	0.017665	0.056716	883
BMgn009109	0.017684	0.066607	884
BMgn010640	0.017704	0.046126	885
BMgn012536	0.017718	0.046167	886
BMgn005448	0.017773	0.017741	887
BMgn006888	0.017799	0.046364	888
BMgn003437	0.017831	0.046441	889
BMgn003840	0.017837	0.046463	890
BMgn002324	0.017853	0.046508	891
BMgn012856	0.017861	0.017816	892
BMgn012452	0.017876	0.046551	893
BMgn004485	0.017885	0.046571	894
BMgn005739	0.01791	0.046628	895
BMgn004164	0.01793	0.046669	896
BMgn012353	0.017949	0.046705	897
BMgn001156	0.017961	0.033353	898
BMgn009221	0.017979	0.033379	899
BMgn000995	0.01804	0.046927	900
BMgn003862	0.018056	0.033517	901
BMgn011008	0.01811	0.033615	902
BMgn008645	0.018129	0.047133	903
BMgn008768	0.018168	0.05817	904
BMgn007044	0.018187	0.068301	905
BMgn012163	0.018221	0.058328	906
BMgn010060	0.018258	0.04744	907
BMgn001496	0.018324	0.047595	908
BMgn000052	0.018394	0.047747	909
BMgn003151	0.018407	0.034161	910
BMgn014209	0.018495	0.034317	911
BMgn014080	0.01852	0.048052	912
BMgn017412	0.018534	0.059263	913
BMgn005572	0.018538	0.034393	914
BMgn017196	0.018628	0.059536	915
BMgn015275	0.018641	0.059578	916
BMgn014958	0.018709	0.070088	917
BMgn007795	0.018719	0.048538	918
BMgn008054	0.01874	0.070194	919
BMgn012262	0.018786	0.048695	920
BMgn004647	0.018846	0.034933	921
BMgn012086	0.018908	0.048993	922
BMgn016579	0.018924	0.018908	923
BMgn001189	0.018991	0.018977	924
BMgn009465	0.019082	0.035339	925
BMgn014670	0.019131	0.03543	926
BMgn013464	0.019177	0.049626	927
BMgn007139	0.019178	0.071702	928
BMgn003695	0.019217	0.035596	929
BMgn003989	0.019236	0.049774	930
BMgn012408	0.019285	0.035703	931
BMgn007610	0.019319	0.072196	932
BMgn008815	0.019367	0.019372	933
BMgn016492	0.019369	0.050097	934
BMgn005470	0.019391	0.061814	935
BMgn000867	0.019408	0.035925	936
BMgn003023	0.019422	0.050221	937
BMgn009344	0.019494	0.06213	938
BMgn015869	0.0195	0.019508	939
BMgn015007	0.019504	0.036065	940
BMgn005724	0.019544	0.019551	941
BMgn004604	0.019612	0.050687	942
BMgn015558	0.019635	0.036307	943
BMgn004163	0.019641	0.062541	944
BMgn005621	0.019683	0.050845	945
BMgn007449	0.019699	0.036441	946
BMgn002218	0.019754	0.051008	947
BMgn008903	0.019761	0.036556	948
BMgn016152	0.019906	0.051384	949
BMgn006074	0.019915	0.074146	950
BMgn006956	0.019923	0.036854	951
BMgn014381	0.019966	0.063471	952
BMgn010397	0.019986	0.036968	953
BMgn006562	0.01999	0.063538	954
BMgn007498	0.019991	0.06354	955
BMgn006941	0.019995	0.063551	956
BMgn008276	0.020043	0.063685	957
BMgn008588	0.020095	0.051853	958
BMgn014605	0.020151	0.052008	959
BMgn015237	0.020162	0.037286	960
BMgn002168	0.020176	0.052063	961
BMgn008424	0.020215	0.052173	962
BMgn014407	0.020348	0.052502	963
BMgn001169	0.020381	0.037681	964
BMgn017138	0.020423	0.052699	965
BMgn008211	0.020448	0.052757	966
BMgn007711	0.020451	0.052761	967
BMgn005277	0.020523	0.065105	968
BMgn012762	0.020532	0.052968	969
BMgn003398	0.020611	0.038107	970
BMgn004849	0.020629	0.020604	971
BMgn002538	0.020654	0.06548	972
BMgn008473	0.020719	0.038304	973
BMgn013576	0.020776	0.038404	974
BMgn005875	0.0208	0.077096	975
BMgn001201	0.020833	0.053751	976
BMgn010588	0.020863	0.038562	977
BMgn014962	0.020864	0.077295	978
BMgn010954	0.020882	0.05387	979
BMgn014760	0.02092	0.066225	980
BMgn013021	0.020946	0.054027	981
BMgn014446	0.02095	0.03872	982
BMgn016759	0.020954	0.054049	983
BMgn000355	0.02105	0.020997	984
BMgn005797	0.021126	0.039027	985
BMgn007178	0.021135	0.066861	986
BMgn006680	0.021175	0.07834	987
BMgn013458	0.021207	0.054675	988
BMgn012602	0.021232	0.039201	989
BMgn006731	0.021265	0.054819	990
BMgn008573	0.021405	0.05515	991
BMgn003560	0.021514	0.055417	992
BMgn008689	0.021549	0.079562	993
BMgn013223	0.021569	0.079627	994
BMgn012154	0.021592	0.079699	995
BMgn005308	0.021598	0.039876	996
BMgn009225	0.021598	0.039876	997
BMgn004393	0.021651	0.039977	998
BMgn011381	0.021658	0.068381	999
BMgn002843	0.021667	0.055792	1000
BMgn002926	0.021695	0.040058	1001
BMgn008921	0.021737	0.021693	1002
BMgn004248	0.02183	0.040289	1003
BMgn009074	0.021871	0.040354	1004
BMgn006477	0.021936	0.021894	1005
BMgn008467	0.021948	0.040518	1006
BMgn011963	0.021958	0.04054	1007
BMgn009907	0.021962	0.069255	1008
BMgn010811	0.021976	0.069297	1009
BMgn013296	0.021997	0.056608	1010
BMgn014133	0.02206	0.056741	1011
BMgn013652	0.022073	0.081295	1012
BMgn014294	0.022097	0.081373	1013
BMgn012698	0.022104	0.056845	1014
BMgn011469	0.022114	0.056869	1015
BMgn010210	0.022145	0.040897	1016
BMgn013675	0.022202	0.022164	1017
BMgn006553	0.022305	0.08205	1018
BMgn007929	0.022306	0.082054	1019
BMgn004974	0.022399	0.070515	1020
BMgn015631	0.022433	0.082456	1021
BMgn007662	0.022442	0.070629	1022
BMgn013453	0.022483	0.041501	1023
BMgn014160	0.022505	0.057789	1024
BMgn017256	0.022514	0.08755	1025
BMgn003182	0.0226	0.022566	1026
BMgn009181	0.022613	0.07114	1027
BMgn004115	0.022622	0.058069	1028
BMgn009885	0.022703	0.071386	1029
BMgn017599	0.022766	0.071576	1030
BMgn015816	0.022835	0.058633	1031
BMgn013777	0.022843	0.083785	1032
BMgn007185	0.022871	0.058726	1033
BMgn013096	0.022979	0.084227	1034
BMgn016182	0.02299	0.072196	1035
BMgn014030	0.023014	0.042485	1036
BMgn007193	0.023022	0.084364	1037
BMgn012072	0.023097	0.042638	1038
BMgn011253	0.023169	0.059388	1039
BMgn011028	0.023176	0.023123	1040
BMgn016706	0.023213	0.089551	1041
BMgn003672	0.02328	0.073042	1042
BMgn016673	0.023287	0.023239	1043
BMgn013554	0.02329	0.073065	1044
BMgn015302	0.023313	0.073127	1045
BMgn002385	0.023323	0.085329	1046
BMgn001160	0.023449	0.043263	1047
BMgn001985	0.023476	0.043313	1048
BMgn014550	0.023486	0.023434	1049
BMgn009172	0.02363	0.060469	1050
BMgn010430	0.023639	0.060492	1051
BMgn012299	0.023666	0.043656	1052
BMgn013556	0.023686	0.023618	1053
BMgn008281	0.023752	0.023683	1054
BMgn004176	0.023801	0.060867	1055
BMgn011056	0.023806	0.074542	1056
BMgn017173	0.023826	0.060929	1057
BMgn013311	0.023837	0.074633	1058
BMgn008304	0.023891	0.0611	1059
BMgn002830	0.023922	0.074882	1060
BMgn005114	0.02396	0.061271	1061
BMgn003108	0.024032	0.075201	1062
BMgn016851	0.02406	0.044362	1063
BMgn003440	0.024105	0.075394	1064
BMgn001687	0.024126	0.06164	1065
BMgn010220	0.024171	0.06174	1066
BMgn004881	0.02426	0.061953	1067
BMgn006274	0.024386	0.076181	1068
BMgn008896	0.024394	0.024286	1069
BMgn015223	0.02441	0.044961	1070
BMgn013190	0.024445	0.088949	1071
BMgn009138	0.024472	0.062493	1072
BMgn012665	0.024486	0.062522	1073
BMgn010207	0.0245	0.062552	1074
BMgn006946	0.02452	0.062603	1075
BMgn006894	0.024547	0.045205	1076
BMgn011482	0.024567	0.062711	1077
BMgn006232	0.024633	0.062872	1078
BMgn007144	0.024678	0.06298	1079
BMgn012796	0.024765	0.077276	1080
BMgn005854	0.024777	0.045575	1081
BMgn003804	0.024779	0.063225	1082
BMgn005106	0.024793	0.024693	1083
BMgn011274	0.024827	0.063338	1084
BMgn007554	0.024879	0.077612	1085
BMgn017461	0.024891	0.045778	1086
BMgn015110	0.024902	0.077682	1087
BMgn007710	0.024933	0.077769	1088
BMgn006653	0.024938	0.063594	1089
BMgn005328	0.024983	0.063696	1090
BMgn016241	0.025004	0.045982	1091
BMgn006676	0.025005	0.090684	1092
BMgn006556	0.025116	0.064017	1093
BMgn008036	0.025197	0.091299	1094
BMgn015783	0.025293	0.06447	1095
BMgn012532	0.025419	0.064766	1096
BMgn008447	0.025459	0.046793	1097
BMgn001679	0.025588	0.065178	1098
BMgn005771	0.02559	0.09261	1099
BMgn007383	0.025606	0.047061	1100
BMgn012623	0.025634	0.065282	1101
BMgn000577	0.025703	0.065434	1102
BMgn002075	0.025734	0.079967	1103
BMgn010069	0.025853	0.04749	1104
BMgn012117	0.025888	0.097299	1105
BMgn016621	0.025901	0.080435	1106
BMgn011562	0.026019	0.047771	1107
BMgn002122	0.026106	0.066378	1108
BMgn014121	0.026123	0.047944	1109
BMgn010748	0.026123	0.047944	1110
BMgn017283	0.026152	0.094398	1111
BMgn010756	0.026159	0.048	1112
BMgn005868	0.026163	0.081155	1113
BMgn015205	0.026211	0.081288	1114
BMgn015463	0.026219	0.094622	1115
BMgn000120	0.026246	0.048148	1116
BMgn007480	0.026304	0.066847	1117
BMgn001777	0.02632	0.048288	1118
BMgn014561	0.026334	0.048309	1119
BMgn006121	0.026343	0.081644	1120
BMgn012946	0.026343	0.081644	1121
BMgn015515	0.026403	0.081822	1122
BMgn014814	0.026426	0.08188	1123
BMgn009071	0.026426	0.067145	1124
BMgn008682	0.026442	0.081918	1125
BMgn007840	0.026519	0.095608	1126
BMgn006178	0.026552	0.048698	1127
BMgn014196	0.026571	0.067486	1128
BMgn014079	0.026601	0.048789	1129
BMgn010778	0.026609	0.067584	1130
BMgn004453	0.026618	0.067607	1131
BMgn013299	0.026622	0.048837	1132
BMgn000103	0.026631	0.026585	1133
BMgn012546	0.026732	0.082731	1134
BMgn005961	0.026755	0.096394	1135
BMgn006964	0.026847	0.049238	1136
BMgn009489	0.026858	0.049252	1137
BMgn000389	0.026864	0.068163	1138
BMgn005360	0.026887	0.068222	1139
BMgn004856	0.026894	0.096821	1140
BMgn008897	0.026896	0.068243	1141
BMgn016817	0.026966	0.068406	1142
BMgn010074	0.02697	0.049446	1143
BMgn004294	0.026985	0.026918	1144
BMgn005996	0.027062	0.068619	1145
BMgn005068	0.027068	0.068633	1146
BMgn000481	0.027106	0.083759	1147
BMgn003421	0.02712	0.049693	1148
BMgn016358	0.027123	0.097581	1149
BMgn002710	0.027127	0.083829	1150
BMgn014239	0.027164	0.049761	1151
BMgn004389	0.027176	0.097749	1152
BMgn010530	0.027192	0.084015	1153
BMgn000359	0.027251	0.049929	1154
BMgn007531	0.027285	0.098097	1155
BMgn001773	0.027308	0.069178	1156
BMgn005145	0.027374	0.069334	1157
BMgn007586	0.027451	0.027373	1158
BMgn014146	0.027512	0.098847	1159
BMgn008282	0.027513	0.069654	1160
BMgn005443	0.027533	0.050408	1161
BMgn003631	0.02757	0.085065	1162
BMgn017016	0.027694	0.027631	1163
BMgn003954	0.027805	0.027721	1164
BMgn003018	0.027806	0.050862	1165
BMgn003301	0.027827	0.027743	1166
BMgn003993	0.02786	0.070474	1167
BMgn009992	0.027877	0.085971	1168
BMgn004731	0.027939	0.070664	1169
BMgn014175	0.027942	0.086144	1170
BMgn006861	0.027989	0.070787	1171
BMgn012554	0.028004	0.070832	1172
BMgn001154	0.028057	0.086449	1173
BMgn010204	0.028059	0.086452	1174
BMgn005787	0.028107	0.086599	1175
BMgn009307	0.028181	0.071223	1176
BMgn001515	0.028229	0.086909	1177
BMgn007137	0.028265	0.071424	1178
BMgn006545	0.028311	0.051739	1179
BMgn003805	0.028325	0.10142	1180
BMgn006201	0.028367	0.10436	1181
BMgn001400	0.028385	0.07171	1182
BMgn009155	0.028413	0.087409	1183
BMgn009004	0.028456	0.071886	1184
BMgn009653	0.028472	0.10191	1185
BMgn005714	0.028482	0.052053	1186
BMgn006779	0.028518	0.072034	1187
BMgn007977	0.028588	0.10229	1188
BMgn013396	0.02865	0.072358	1189
BMgn003995	0.028698	0.088204	1190
BMgn007777	0.028733	0.088292	1191
BMgn008906	0.028737	0.05251	1192
BMgn015221	0.028775	0.10289	1193
BMgn015133	0.028779	0.028659	1194
BMgn004754	0.028801	0.088484	1195
BMgn016934	0.028808	0.07272	1196
BMgn007868	0.028839	0.10308	1197
BMgn003905	0.028869	0.088683	1198
BMgn010842	0.029023	0.053016	1199
BMgn008268	0.029044	0.089133	1200
BMgn009473	0.029118	0.089357	1201
BMgn012257	0.029136	0.10402	1202
BMgn002375	0.029152	0.089455	1203
BMgn015717	0.029185	0.089548	1204
BMgn007011	0.029218	0.08964	1205
BMgn005731	0.029231	0.073696	1206
BMgn004609	0.029267	0.029196	1207
BMgn002671	0.029288	0.073832	1208
BMgn016264	0.029313	0.073889	1209
BMgn005085	0.029318	0.10455	1210
BMgn015805	0.029347	0.053584	1211
BMgn017530	0.029351	0.073973	1212
BMgn007090	0.02938	0.10474	1213
BMgn010930	0.029391	0.053666	1214
BMgn013548	0.029404	0.10481	1215
BMgn014960	0.029413	0.090182	1216
BMgn004379	0.029478	0.053833	1217
BMgn014084	0.029527	0.074366	1218
BMgn010353	0.029531	0.053929	1219
BMgn006399	0.029588	0.090637	1220
BMgn004373	0.029599	0.029524	1221
BMgn013305	0.029609	0.054071	1222
BMgn017358	0.029633	0.074607	1223
BMgn007233	0.029651	0.090818	1224
BMgn016072	0.029696	0.054216	1225
BMgn000188	0.029783	0.054354	1226
BMgn016833	0.029783	0.054355	1227
BMgn010657	0.029898	0.075197	1228
BMgn009706	0.029957	0.075319	1229
BMgn001303	0.029959	0.054642	1230
BMgn005434	0.029986	0.091741	1231
BMgn001783	0.030089	0.054871	1232
BMgn001712	0.030123	0.075713	1233
BMgn010462	0.030146	0.092204	1234
BMgn002504	0.030154	0.075776	1235
BMgn003022	0.030206	0.075907	1236
BMgn013321	0.03023	0.092438	1237
BMgn010460	0.030249	0.10748	1238
BMgn013802	0.030372	0.055346	1239
BMgn010325	0.030394	0.076304	1240
BMgn006815	0.030394	0.092874	1241
BMgn017343	0.030479	0.10819	1242
BMgn000528	0.030481	0.055541	1243
BMgn007935	0.030494	0.055559	1244
BMgn014755	0.030494	0.055559	1245
BMgn015152	0.030517	0.093206	1246
BMgn009494	0.030535	0.10839	1247
BMgn000308	0.030552	0.076671	1248
BMgn011143	0.030627	0.076841	1249
BMgn001437	0.030656	0.055825	1250
BMgn005267	0.030695	0.093689	1251
BMgn015511	0.030706	0.030591	1252
BMgn001228	0.030728	0.030613	1253
BMgn001358	0.030808	0.056117	1254
BMgn005799	0.030861	0.030751	1255
BMgn011887	0.030902	0.10958	1256
BMgn000984	0.030917	0.056288	1257
BMgn005136	0.030935	0.077575	1258
BMgn014850	0.030959	0.10978	1259
BMgn008147	0.030989	0.077691	1260
BMgn007577	0.030991	0.094498	1261
BMgn014712	0.031039	0.077797	1262
BMgn017465	0.031048	0.056514	1263
BMgn011451	0.031065	0.077853	1264
BMgn016277	0.031091	0.077911	1265
BMgn013846	0.031092	0.11193	1266
BMgn005654	0.031109	0.11024	1267
BMgn004920	0.031238	0.031136	1268
BMgn013669	0.031239	0.095197	1269
BMgn011509	0.031245	0.056851	1270
BMgn006558	0.031248	0.095224	1271
BMgn001165	0.03126	0.031155	1272
BMgn006281	0.031275	0.095302	1273
BMgn000963	0.031334	0.078456	1274
BMgn012189	0.031366	0.07853	1275
BMgn002095	0.031454	0.07873	1276
BMgn000873	0.031528	0.057371	1277
BMgn014220	0.031555	0.078978	1278
BMgn004398	0.031657	0.11161	1279
BMgn017072	0.031673	0.079247	1280
BMgn006649	0.031716	0.079358	1281
BMgn007944	0.031716	0.057701	1282
BMgn004961	0.031733	0.079398	1283
BMgn003195	0.03176	0.096595	1284
BMgn015749	0.031867	0.11211	1285
BMgn011247	0.031933	0.079829	1286
BMgn005516	0.031949	0.058107	1287
BMgn013963	0.031973	0.079918	1288
BMgn007762	0.032004	0.097249	1289
BMgn003070	0.032012	0.080001	1290
BMgn010510	0.032057	0.031986	1291
BMgn010333	0.032106	0.080225	1292
BMgn010746	0.032174	0.097689	1293
BMgn004150	0.032246	0.097903	1294
BMgn000957	0.032247	0.097904	1295
BMgn004658	0.032253	0.097917	1296
BMgn000268	0.032274	0.097969	1297
BMgn003318	0.032278	0.032216	1298
BMgn014877	0.032316	0.080723	1299
BMgn006819	0.032349	0.080792	1300
BMgn004109	0.032366	0.058858	1301
BMgn011096	0.032403	0.080906	1302
BMgn013138	0.032417	0.080939	1303
BMgn012563	0.032422	0.098367	1304
BMgn008318	0.032454	0.059005	1305
BMgn001112	0.032496	0.081117	1306
BMgn013924	0.032506	0.09859	1307
BMgn008749	0.032518	0.11361	1308
BMgn003339	0.03253	0.059146	1309
BMgn003753	0.032565	0.11373	1310
BMgn000292	0.032566	0.05921	1311
BMgn012626	0.032573	0.059223	1312
BMgn014397	0.032585	0.098806	1313
BMgn002919	0.032617	0.059306	1314
BMgn011513	0.032648	0.098974	1315
BMgn008353	0.03268	0.099047	1316
BMgn004412	0.03275	0.059543	1317
BMgn006982	0.032824	0.09943	1318
BMgn016787	0.032857	0.099514	1319
BMgn011705	0.032862	0.059745	1320
BMgn005022	0.032876	0.03284	1321
BMgn005001	0.032926	0.099722	1322
BMgn006306	0.032931	0.11704	1323
BMgn002766	0.032938	0.099755	1324
BMgn016417	0.03294	0.082127	1325
BMgn011737	0.032951	0.059889	1326
BMgn010399	0.032967	0.08218	1327
BMgn013901	0.033008	0.11724	1328
BMgn008887	0.033009	0.059991	1329
BMgn001073	0.03302	0.11483	1330
BMgn002580	0.033056	0.082397	1331
BMgn009842	0.033081	0.082448	1332
BMgn004797	0.033184	0.060283	1333
BMgn006209	0.033192	0.11523	1334
BMgn006012	0.033194	0.10044	1335
BMgn007551	0.033212	0.1005	1336
BMgn011889	0.033256	0.082849	1337
BMgn007497	0.033339	0.10083	1338
BMgn012232	0.033401	0.060678	1339
BMgn006464	0.03351	0.083431	1340
BMgn001457	0.033521	0.10132	1341
BMgn012836	0.033569	0.060957	1342
BMgn002506	0.033569	0.060957	1343
BMgn015755	0.033569	0.060957	1344
BMgn010159	0.033569	0.060957	1345
BMgn015459	0.0336	0.08365	1346
BMgn013755	0.033607	0.083663	1347
BMgn000110	0.033655	0.083789	1348
BMgn005672	0.033706	0.061196	1349
BMgn002862	0.033727	0.061232	1350
BMgn010291	0.033749	0.084005	1351
BMgn007136	0.033803	0.10205	1352
BMgn012495	0.03386	0.10223	1353
BMgn009861	0.033936	0.11694	1354
BMgn010136	0.033958	0.10248	1355
BMgn009615	0.034023	0.084625	1356
BMgn011158	0.03406	0.10277	1357
BMgn008149	0.034093	0.08477	1358
BMgn009766	0.034107	0.1029	1359
BMgn000247	0.03422	0.085067	1360
BMgn012328	0.034249	0.085127	1361
BMgn014641	0.034254	0.085144	1362
BMgn000219	0.034379	0.08543	1363
BMgn009419	0.03443	0.085544	1364
BMgn003747	0.034455	0.062478	1365
BMgn004973	0.034556	0.10409	1366
BMgn011699	0.034623	0.085973	1367
BMgn004837	0.034668	0.11859	1368
BMgn011783	0.034693	0.086117	1369
BMgn014254	0.034702	0.06289	1370
BMgn013882	0.034728	0.10454	1371
BMgn001269	0.034773	0.086289	1372
BMgn007523	0.034847	0.03481	1373
BMgn015844	0.034892	0.086579	1374
BMgn004629	0.034924	0.086653	1375
BMgn003207	0.034925	0.063274	1376
BMgn004635	0.034933	0.063294	1377
BMgn005774	0.035024	0.1194	1378
BMgn017519	0.035036	0.10535	1379
BMgn015454	0.035051	0.10538	1380
BMgn008425	0.035097	0.087053	1381
BMgn004949	0.035097	0.087053	1382
BMgn016085	0.035097	0.11956	1383
BMgn008140	0.03529	0.06392	1384
BMgn015895	0.03529	0.06392	1385
BMgn005467	0.035303	0.087547	1386
BMgn014071	0.035309	0.1061	1387
BMgn000828	0.035388	0.087724	1388
BMgn008202	0.035423	0.087803	1389
BMgn012287	0.035507	0.064294	1390
BMgn005352	0.035527	0.12057	1391
BMgn017316	0.03553	0.10672	1392
BMgn008086	0.035607	0.064469	1393
BMgn006919	0.035613	0.10694	1394
BMgn012165	0.035795	0.064796	1395
BMgn012191	0.035899	0.088846	1396
BMgn004045	0.035955	0.035886	1397
BMgn013649	0.03597	0.089026	1398
BMgn007332	0.035971	0.10793	1399
BMgn000663	0.035977	0.035908	1400
BMgn015554	0.035999	0.03593	1401
BMgn012581	0.036011	0.089117	1402
BMgn009495	0.036041	0.12558	1403
BMgn006590	0.036131	0.10835	1404
BMgn016326	0.036142	0.12198	1405
BMgn010221	0.036195	0.10854	1406
BMgn017054	0.036216	0.1086	1407
BMgn016148	0.036227	0.12217	1408
BMgn008686	0.036292	0.12231	1409
BMgn003750	0.036301	0.10884	1410
BMgn000922	0.036316	0.06571	1411
BMgn011067	0.036321	0.065722	1412
BMgn004131	0.03636	0.065785	1413
BMgn007951	0.036412	0.10911	1414
BMgn006949	0.036515	0.10938	1415
BMgn016761	0.036546	0.09032	1416
BMgn014900	0.036564	0.1095	1417
BMgn011022	0.036597	0.090428	1418
BMgn013244	0.036597	0.090428	1419
BMgn013158	0.036597	0.090428	1420
BMgn007492	0.036634	0.066265	1421
BMgn013441	0.036649	0.090544	1422
BMgn000755	0.036663	0.036591	1423
BMgn005465	0.036702	0.06638	1424
BMgn004242	0.036773	0.090836	1425
BMgn007068	0.036779	0.090851	1426
BMgn005535	0.036817	0.090947	1427
BMgn008048	0.036818	0.036727	1428
BMgn010717	0.036957	0.12383	1429
BMgn008055	0.036992	0.11062	1430
BMgn001052	0.036996	0.036925	1431
BMgn011087	0.037056	0.067	1432
BMgn011813	0.037075	0.091517	1433
BMgn004979	0.037084	0.037008	1434
BMgn012008	0.037168	0.091716	1435
BMgn003365	0.037228	0.09184	1436
BMgn014988	0.037231	0.091846	1437
BMgn001660	0.037238	0.091861	1438
BMgn012821	0.037297	0.091988	1439
BMgn014606	0.037404	0.11171	1440
BMgn013034	0.037418	0.11175	1441
BMgn008166	0.037427	0.092281	1442
BMgn012709	0.037453	0.067692	1443
BMgn010992	0.037457	0.12494	1444
BMgn014532	0.03746	0.092354	1445
BMgn012164	0.037504	0.067777	1446
BMgn016390	0.03767	0.12541	1447
BMgn009918	0.037722	0.09297	1448
BMgn009184	0.037766	0.11266	1449
BMgn003878	0.037773	0.068218	1450
BMgn002845	0.037815	0.093175	1451
BMgn017493	0.037826	0.0932	1452
BMgn008952	0.037829	0.11284	1453
BMgn013863	0.03787	0.0933	1454
BMgn017090	0.037995	0.11323	1455
BMgn005684	0.038035	0.093656	1456
BMgn004882	0.038141	0.068893	1457
BMgn015100	0.038142	0.068894	1458
BMgn011281	0.038176	0.1266	1459
BMgn010438	0.038197	0.11378	1460
BMgn016915	0.038237	0.069064	1461
BMgn015500	0.038247	0.11392	1462
BMgn014565	0.038259	0.11396	1463
BMgn004765	0.038332	0.069222	1464
BMgn004906	0.038338	0.094335	1465
BMgn013826	0.038371	0.069299	1466
BMgn014811	0.038372	0.13183	1467
BMgn008614	0.038408	0.11435	1468
BMgn017276	0.038427	0.069399	1469
BMgn000994	0.038456	0.094601	1470
BMgn006960	0.038456	0.094601	1471
BMgn015189	0.038459	0.11449	1472
BMgn007192	0.038502	0.038417	1473
BMgn006966	0.038596	0.11484	1474
BMgn014388	0.038618	0.094959	1475
BMgn012061	0.03867	0.13262	1476
BMgn005773	0.038712	0.09517	1477
BMgn004175	0.038723	0.069939	1478
BMgn007513	0.038837	0.070122	1479
BMgn015854	0.03885	0.11552	1480
BMgn010111	0.038922	0.038848	1481
BMgn011344	0.038952	0.1158	1482
BMgn014482	0.038953	0.095698	1483
BMgn006950	0.039103	0.070623	1484
BMgn004657	0.039103	0.070623	1485
BMgn011804	0.039122	0.03904	1486
BMgn003348	0.039175	0.096208	1487
BMgn009166	0.039179	0.12886	1488
BMgn006754	0.039263	0.096404	1489
BMgn004951	0.039268	0.11664	1490
BMgn001547	0.039271	0.070919	1491
BMgn006958	0.039304	0.096499	1492
BMgn007058	0.039313	0.096523	1493
BMgn015879	0.039432	0.071174	1494
BMgn012870	0.039441	0.071188	1495
BMgn009016	0.039459	0.071213	1496
BMgn013344	0.039487	0.11719	1497
BMgn015020	0.039551	0.09704	1498
BMgn010712	0.039562	0.12974	1499
BMgn005316	0.03959	0.097131	1500
BMgn002450	0.039627	0.097212	1501
BMgn015278	0.03966	0.097291	1502
BMgn009088	0.039697	0.071645	1503
BMgn004898	0.039716	0.097424	1504
BMgn012533	0.039723	0.071695	1505
BMgn014312	0.039744	0.097489	1506
BMgn007157	0.039744	0.11788	1507
BMgn013024	0.039763	0.11792	1508
BMgn009721	0.039792	0.071805	1509
BMgn017315	0.039814	0.097633	1510
BMgn011484	0.039886	0.09779	1511
BMgn009243	0.039902	0.13053	1512
BMgn006991	0.039916	0.11833	1513
BMgn004435	0.040009	0.072195	1514
BMgn005770	0.040052	0.072276	1515
BMgn007415	0.04008	0.098253	1516
BMgn009964	0.040276	0.13138	1517
BMgn015594	0.040313	0.072712	1518
BMgn002702	0.040352	0.072777	1519
BMgn002570	0.040397	0.072868	1520
BMgn013008	0.04047	0.11981	1521
BMgn006083	0.040548	0.073122	1522
BMgn001800	0.040649	0.099527	1523
BMgn017075	0.040667	0.12034	1524
BMgn006357	0.040672	0.040568	1525
BMgn012248	0.040675	0.12036	1526
BMgn017361	0.040689	0.12041	1527
BMgn009847	0.040703	0.073403	1528
BMgn012516	0.040738	0.040626	1529
BMgn006100	0.040767	0.099785	1530
BMgn004980	0.040783	0.040676	1531
BMgn004296	0.040816	0.073595	1532
BMgn007371	0.040823	0.12075	1533
BMgn005869	0.040877	0.073698	1534
BMgn014222	0.040879	0.12089	1535
BMgn002161	0.040888	0.10005	1536
BMgn017382	0.040901	0.10008	1537
BMgn016784	0.040996	0.073913	1538
BMgn009829	0.041026	0.040915	1539
BMgn013119	0.041047	0.12134	1540
BMgn011511	0.041114	0.10056	1541
BMgn004566	0.041249	0.12189	1542
BMgn005956	0.041298	0.13371	1543
BMgn005157	0.041328	0.10102	1544
BMgn017614	0.041337	0.074464	1545
BMgn016198	0.041365	0.12219	1546
BMgn002886	0.041398	0.12228	1547
BMgn010999	0.041438	0.13404	1548
BMgn005487	0.041484	0.074723	1549
BMgn006327	0.041492	0.14023	1550
BMgn004606	0.041502	0.10142	1551
BMgn003670	0.041511	0.12258	1552
BMgn005588	0.041519	0.10146	1553
BMgn011413	0.041583	0.13438	1554
BMgn007799	0.041599	0.074919	1555
BMgn012814	0.041626	0.074966	1556
BMgn013470	0.041633	0.12289	1557
BMgn001195	0.041715	0.12308	1558
BMgn016490	0.041735	0.041666	1559
BMgn007897	0.041744	0.075151	1560
BMgn008532	0.04176	0.10199	1561
BMgn008706	0.041771	0.075192	1562
BMgn003526	0.041773	0.12324	1563
BMgn004872	0.041862	0.1022	1564
BMgn003059	0.041878	0.12351	1565
BMgn014337	0.041932	0.10236	1566
BMgn007363	0.042039	0.1026	1567
BMgn007367	0.04204	0.12393	1568
BMgn001532	0.042147	0.10283	1569
BMgn014663	0.042152	0.075859	1570
BMgn001155	0.042192	0.10293	1571
BMgn006461	0.042264	0.076046	1572
BMgn008726	0.042276	0.1031	1573
BMgn002026	0.042434	0.076338	1574
BMgn008399	0.042477	0.042408	1575
BMgn004736	0.04248	0.076421	1576
BMgn002092	0.042525	0.076501	1577
BMgn002981	0.042568	0.076579	1578
BMgn008436	0.042571	0.10378	1579
BMgn007458	0.04261	0.10386	1580
BMgn014468	0.042623	0.13674	1581
BMgn014377	0.042713	0.13693	1582
BMgn013949	0.042731	0.076866	1583
BMgn013985	0.042782	0.10425	1584
BMgn005547	0.042793	0.10428	1585
BMgn009794	0.042799	0.10429	1586
BMgn005315	0.042842	0.10439	1587
BMgn002821	0.042855	0.077068	1588
BMgn013182	0.042857	0.10443	1589
BMgn008583	0.042905	0.12623	1590
BMgn008579	0.042908	0.12624	1591
BMgn002491	0.042908	0.12624	1592
BMgn010943	0.042922	0.10455	1593
BMgn003338	0.042929	0.10457	1594
BMgn005976	0.04302	0.077341	1595
BMgn006455	0.043044	0.077378	1596
BMgn003852	0.043116	0.10497	1597
BMgn006802	0.043116	0.10497	1598
BMgn000959	0.043177	0.12693	1599
BMgn007271	0.043198	0.10515	1600
BMgn003068	0.043205	0.12699	1601
BMgn015148	0.043241	0.043191	1602
BMgn001887	0.043284	0.12719	1603
BMgn002220	0.043372	0.13838	1604
BMgn006985	0.04338	0.12746	1605
BMgn008954	0.043431	0.12758	1606
BMgn005108	0.043438	0.10571	1607
BMgn000778	0.043453	0.10574	1608
BMgn013328	0.04352	0.12784	1609
BMgn007584	0.043522	0.12784	1610
BMgn014901	0.043585	0.13887	1611
BMgn005127	0.043702	0.1063	1612
BMgn012509	0.04374	0.10638	1613
BMgn014019	0.043805	0.12855	1614
BMgn010759	0.043889	0.13953	1615
BMgn006454	0.043925	0.078906	1616
BMgn002543	0.043933	0.12889	1617
BMgn008671	0.043938	0.10681	1618
BMgn006090	0.04398	0.10689	1619
BMgn007203	0.044013	0.10697	1620
BMgn016003	0.044046	0.10704	1621
BMgn004712	0.044088	0.10714	1622
BMgn007774	0.044098	0.10716	1623
BMgn012182	0.044147	0.10727	1624
BMgn006978	0.044287	0.10758	1625
BMgn014714	0.044362	0.10773	1626
BMgn008928	0.044394	0.13006	1627
BMgn000819	0.044405	0.10783	1628
BMgn007709	0.044415	0.044381	1629
BMgn007732	0.044545	0.10813	1630
BMgn013521	0.044547	0.13045	1631
BMgn005274	0.044577	0.080061	1632
BMgn009481	0.044605	0.080113	1633
BMgn005524	0.044625	0.13065	1634
BMgn013608	0.044629	0.10832	1635
BMgn011318	0.044629	0.10832	1636
BMgn002357	0.044654	0.10838	1637
BMgn016642	0.044662	0.1084	1638
BMgn015349	0.044699	0.080273	1639
BMgn009525	0.044703	0.044674	1640
BMgn004213	0.044771	0.10864	1641
BMgn015809	0.044777	0.080387	1642
BMgn002552	0.044777	0.10865	1643
BMgn014177	0.044781	0.14155	1644
BMgn005072	0.044813	0.044799	1645
BMgn008154	0.04482	0.08046	1646
BMgn003400	0.044832	0.13117	1647
BMgn009872	0.044846	0.1088	1648
BMgn008382	0.04485	0.14169	1649
BMgn002480	0.044856	0.10882	1650
BMgn006656	0.044863	0.080526	1651
BMgn010427	0.044867	0.13128	1652
BMgn010958	0.044892	0.13135	1653
BMgn016703	0.044907	0.080595	1654
BMgn002779	0.044979	0.044974	1655
BMgn007907	0.045014	0.10915	1656
BMgn010178	0.04505	0.10923	1657
BMgn012314	0.045058	0.10924	1658
BMgn000940	0.045065	0.10926	1659
BMgn013619	0.045082	0.13182	1660
BMgn014848	0.04516	0.13201	1661
BMgn001885	0.045174	0.10948	1662
BMgn001554	0.04531	0.081254	1663
BMgn007889	0.04531	0.081254	1664
BMgn004795	0.045415	0.11001	1665
BMgn011951	0.04546	0.11012	1666
BMgn006267	0.045469	0.081497	1667
BMgn011966	0.045475	0.11014	1668
BMgn009292	0.0455	0.1102	1669
BMgn000491	0.045504	0.13288	1670
BMgn010775	0.045542	0.11029	1671
BMgn008803	0.045565	0.14334	1672
BMgn011824	0.045588	0.045608	1673
BMgn000991	0.045682	0.11059	1674
BMgn016553	0.045711	0.081921	1675
BMgn002559	0.045758	0.11077	1676
BMgn015128	0.045772	0.082032	1677
BMgn003130	0.045782	0.08205	1678
BMgn002005	0.04583	0.082126	1679
BMgn014935	0.045859	0.13379	1680
BMgn004003	0.045869	0.111	1681
BMgn005991	0.045876	0.045859	1682
BMgn014054	0.045916	0.13394	1683
BMgn000498	0.045971	0.11122	1684
BMgn013538	0.045988	0.082392	1685
BMgn010205	0.046006	0.14432	1686
BMgn003984	0.046027	0.13421	1687
BMgn003367	0.046065	0.11144	1688
BMgn016578	0.046144	0.11161	1689
BMgn000107	0.04615	0.11163	1690
BMgn003582	0.046173	0.13456	1691
BMgn006918	0.046219	0.082772	1692
BMgn012434	0.046259	0.13478	1693
BMgn008267	0.04627	0.11191	1694
BMgn008674	0.046291	0.13485	1695
BMgn000953	0.046296	0.11197	1696
BMgn012489	0.046343	0.14504	1697
BMgn016713	0.046344	0.13499	1698
BMgn006291	0.046403	0.11221	1699
BMgn014416	0.046429	0.13521	1700
BMgn011902	0.046466	0.11234	1701
BMgn009535	0.046486	0.13535	1702
BMgn007471	0.046541	0.046525	1703
BMgn013216	0.046566	0.13555	1704
BMgn014258	0.04662	0.083431	1705
BMgn011674	0.046637	0.13573	1706
BMgn003434	0.046644	0.11275	1707
BMgn006824	0.046649	0.083483	1708
BMgn001591	0.04668	0.083555	1709
BMgn015413	0.046686	0.13584	1710
BMgn014140	0.0467	0.11286	1711
BMgn009083	0.046717	0.11289	1712
BMgn009959	0.046724	0.1129	1713
BMgn011068	0.046745	0.14589	1714
BMgn001826	0.046769	0.11299	1715
BMgn017471	0.046794	0.11305	1716
BMgn014936	0.046825	0.11312	1717
BMgn011466	0.046852	0.11317	1718
BMgn002289	0.046878	0.14618	1719
BMgn016314	0.046897	0.083902	1720
BMgn008855	0.046981	0.11346	1721
BMgn016450	0.047013	0.084099	1722
BMgn014130	0.04711	0.11372	1723
BMgn007536	0.047244	0.084499	1724
BMgn010784	0.047303	0.11414	1725
BMgn005804	0.047532	0.13795	1726
BMgn012151	0.047582	0.047571	1727
BMgn006642	0.047632	0.085148	1728
BMgn003192	0.047663	0.0852	1729
BMgn001652	0.047663	0.0852	1730
BMgn014503	0.047675	0.11493	1731
BMgn016276	0.047712	0.13843	1732
BMgn000357	0.047718	0.085285	1733
BMgn004008	0.047767	0.13855	1734
BMgn005120	0.047772	0.13856	1735
BMgn010010	0.047776	0.11515	1736
BMgn001286	0.047808	0.13865	1737
BMgn015286	0.04787	0.04786	1738
BMgn000367	0.047896	0.1154	1739
BMgn016735	0.04792	0.085603	1740
BMgn003757	0.047978	0.085707	1741
BMgn014965	0.047998	0.085737	1742
BMgn013605	0.048049	0.13922	1743
BMgn007580	0.048092	0.14887	1744
BMgn013500	0.048097	0.13933	1745
BMgn016445	0.048148	0.13946	1746
BMgn012852	0.048157	0.048154	1747
BMgn013345	0.04818	0.048175	1748
BMgn017186	0.048203	0.11611	1749
BMgn013406	0.048229	0.15777	1750
BMgn001799	0.048323	0.086276	1751
BMgn007042	0.048394	0.14005	1752
BMgn004301	0.048426	0.086449	1753
BMgn004806	0.048445	0.086483	1754
BMgn012266	0.048455	0.086505	1755
BMgn010715	0.048462	0.11668	1756
BMgn007846	0.048462	0.11668	1757
BMgn011507	0.048556	0.048571	1758
BMgn006860	0.048582	0.086708	1759
BMgn009769	0.04863	0.11705	1760
BMgn000766	0.04865	0.086815	1761
BMgn015786	0.048653	0.1171	1762
BMgn005399	0.048666	0.14075	1763
BMgn015866	0.048763	0.11732	1764
BMgn007519	0.048821	0.14117	1765
BMgn015705	0.048858	0.14128	1766
BMgn010788	0.048885	0.08722	1767
BMgn002624	0.048908	0.14141	1768
BMgn002373	0.049014	0.087462	1769
BMgn002266	0.049018	0.15089	1770
BMgn016726	0.049039	0.1179	1771
BMgn014059	0.04923	0.087816	1772
BMgn009609	0.049243	0.11837	1773
BMgn007525	0.049312	0.14242	1774
BMgn005596	0.049325	0.14245	1775
BMgn014910	0.049333	0.14248	1776
BMgn016546	0.049352	0.14253	1777
BMgn017590	0.049355	0.14254	1778
BMgn004174	0.049375	0.049435	1779
BMgn005385	0.049403	0.088116	1780
BMgn005408	0.049462	0.14281	1781
BMgn014905	0.049517	0.11896	1782
BMgn006015	0.049548	0.11904	1783
BMgn015753	0.049553	0.049625	1784
BMgn011319	0.049598	0.14318	1785
BMgn011721	0.049618	0.14323	1786
BMgn000978	0.049619	0.11918	1787
BMgn013865	0.049678	0.15235	1788
BMgn001927	0.049717	0.14347	1789
BMgn007026	0.049792	0.088787	1790
BMgn005029	0.049809	0.11958	1791
BMgn017523	0.049818	0.049896	1792
BMgn006751	0.049835	0.088865	1793
BMgn001024	0.049858	0.11966	1794
BMgn009804	0.049879	0.15279	1795
BMgn013139	0.049894	0.088972	1796
BMgn006582	0.049896	0.15283	1797
BMgn001249	0.049925	0.11982	1798
BMgn000805	0.049975	0.14414	1799
BMgn006364	0.050051	0.14432	1800
BMgn010913	0.050123	0.15332	1801
BMgn012651	0.050222	0.12045	1802
BMgn002459	0.050247	0.1205	1803
BMgn002115	0.050267	0.089557	1804
BMgn009565	0.050296	0.15369	1805
BMgn013304	0.050322	0.14502	1806
BMgn009461	0.050353	0.089708	1807
BMgn006211	0.050395	0.089782	1808
BMgn016210	0.050424	0.089829	1809
BMgn011805	0.050451	0.12094	1810
BMgn013731	0.050644	0.16393	1811
BMgn007015	0.050666	0.15449	1812
BMgn005966	0.050739	0.14606	1813
BMgn005093	0.050741	0.090351	1814
BMgn011714	0.050758	0.14611	1815
BMgn014193	0.050772	0.12164	1816
BMgn013598	0.050849	0.12181	1817
BMgn005048	0.050858	0.090538	1818
BMgn014466	0.050923	0.090659	1819
BMgn007027	0.050952	0.14661	1820
BMgn013434	0.051043	0.090855	1821
BMgn008499	0.051061	0.12228	1822
BMgn006136	0.051072	0.14689	1823
BMgn010102	0.051129	0.14703	1824
BMgn002709	0.051208	0.14723	1825
BMgn006850	0.051259	0.091201	1826
BMgn010886	0.051285	0.12277	1827
BMgn015648	0.051324	0.051373	1828
BMgn004221	0.051329	0.14754	1829
BMgn008011	0.05135	0.12293	1830
BMgn000069	0.051364	0.091387	1831
BMgn006716	0.051508	0.12328	1832
BMgn001371	0.051604	0.091788	1833
BMgn012107	0.051625	0.091814	1834
BMgn002223	0.05164	0.09184	1835
BMgn005690	0.051643	0.12355	1836
BMgn004264	0.051722	0.12373	1837
BMgn017125	0.051785	0.12387	1838
BMgn003709	0.051786	0.092117	1839
BMgn014520	0.051927	0.12418	1840
BMgn010888	0.051991	0.12434	1841
BMgn010477	0.051992	0.092459	1842
BMgn003237	0.051998	0.092469	1843
BMgn001574	0.052079	0.092608	1844
BMgn004326	0.052144	0.052191	1845
BMgn003432	0.052183	0.12474	1846
BMgn000473	0.052208	0.09283	1847
BMgn015929	0.052272	0.15801	1848
BMgn014268	0.052294	0.092967	1849
BMgn008878	0.052313	0.12501	1850
BMgn016655	0.052317	0.092999	1851
BMgn016979	0.05244	0.12529	1852
BMgn009735	0.052467	0.093253	1853
BMgn009493	0.052543	0.15067	1854
BMgn010940	0.052596	0.093485	1855
BMgn000825	0.052631	0.052672	1856
BMgn012202	0.052687	0.16918	1857
BMgn006380	0.052696	0.12587	1858
BMgn005223	0.052697	0.093645	1859
BMgn010538	0.05276	0.12601	1860
BMgn004994	0.052768	0.12602	1861
BMgn017504	0.052799	0.093811	1862
BMgn015972	0.05283	0.15921	1863
BMgn010695	0.052862	0.15146	1864
BMgn015954	0.052888	0.12627	1865
BMgn000976	0.052941	0.094037	1866
BMgn017576	0.05307	0.15198	1867
BMgn015539	0.053125	0.094369	1868
BMgn010602	0.053145	0.12682	1869
BMgn008430	0.053165	0.15221	1870
BMgn007089	0.053166	0.15221	1871
BMgn000047	0.053197	0.094492	1872
BMgn010626	0.053207	0.053226	1873
BMgn005074	0.053207	0.15231	1874
BMgn007574	0.053231	0.15238	1875
BMgn012223	0.053303	0.12717	1876
BMgn008230	0.053318	0.05334	1877
BMgn016606	0.053332	0.12724	1878
BMgn008804	0.053346	0.12727	1879
BMgn008407	0.053372	0.09478	1880
BMgn014899	0.053411	0.094842	1881
BMgn002984	0.053492	0.15308	1882
BMgn010317	0.053593	0.12782	1883
BMgn012869	0.053631	0.15342	1884
BMgn004350	0.0538	0.12823	1885
BMgn004304	0.053858	0.15401	1886
BMgn002432	0.053861	0.12835	1887
BMgn006265	0.05388	0.12839	1888
BMgn004457	0.05393	0.15419	1889
BMgn015361	0.053965	0.12858	1890
BMgn006396	0.053986	0.09585	1891
BMgn006061	0.05403	0.16186	1892
BMgn005699	0.054049	0.12877	1893
BMgn012227	0.054071	0.054058	1894
BMgn016611	0.054081	0.12884	1895
BMgn003685	0.054093	0.054076	1896
BMgn005193	0.054114	0.1289	1897
BMgn005660	0.054226	0.15492	1898
BMgn014400	0.05427	0.05424	1899
BMgn013713	0.054297	0.1293	1900
BMgn003397	0.05432	0.096452	1901
BMgn004896	0.054406	0.16272	1902
BMgn016147	0.054562	0.15576	1903
BMgn012278	0.054617	0.13001	1904
BMgn004428	0.054647	0.15598	1905
BMgn010646	0.05467	0.16331	1906
BMgn007320	0.054679	0.13016	1907
BMgn011888	0.05469	0.13018	1908
BMgn010475	0.054766	0.13035	1909
BMgn001055	0.054794	0.097249	1910
BMgn011359	0.054844	0.097342	1911
BMgn000897	0.054881	0.13059	1912
BMgn012967	0.054947	0.16393	1913
BMgn013536	0.055001	0.13083	1914
BMgn004841	0.055177	0.15729	1915
BMgn014913	0.055204	0.15735	1916
BMgn008904	0.055228	0.15741	1917
BMgn015947	0.055254	0.15747	1918
BMgn002774	0.055262	0.13137	1919
BMgn009854	0.055267	0.098059	1920
BMgn001805	0.055295	0.13144	1921
BMgn000125	0.055344	0.13155	1922
BMgn007372	0.055439	0.098346	1923
BMgn009462	0.055458	0.15796	1924
BMgn010129	0.055459	0.1318	1925
BMgn000769	0.055474	0.13183	1926
BMgn016688	0.055484	0.15803	1927
BMgn014469	0.055498	0.13189	1928
BMgn011881	0.055513	0.13192	1929
BMgn003791	0.055543	0.15818	1930
BMgn007943	0.055577	0.13203	1931
BMgn009612	0.055582	0.16531	1932
BMgn008464	0.055583	0.15828	1933
BMgn005677	0.055645	0.098681	1934
BMgn001612	0.055702	0.1323	1935
BMgn004279	0.055711	0.13232	1936
BMgn011094	0.055793	0.1588	1937
BMgn006880	0.055794	0.16577	1938
BMgn010544	0.055846	0.15892	1939
BMgn012270	0.055866	0.13263	1940
BMgn010681	0.055876	0.13265	1941
BMgn013825	0.055877	0.159	1942
BMgn016848	0.055931	0.055848	1943
BMgn011619	0.055991	0.099246	1944
BMgn006531	0.056022	0.099306	1945
BMgn011938	0.05612	0.13315	1946
BMgn005733	0.056243	0.15994	1947
BMgn010604	0.056274	0.099736	1948
BMgn016441	0.056344	0.13363	1949
BMgn006249	0.05637	0.16027	1950
BMgn014201	0.056392	0.16032	1951
BMgn014410	0.056392	0.16033	1952
BMgn013236	0.056398	0.16707	1953
BMgn007199	0.056411	0.099955	1954
BMgn010768	0.056421	0.099977	1955
BMgn016389	0.056472	0.1339	1956
BMgn012082	0.056477	0.16053	1957
BMgn012139	0.056495	0.16058	1958
BMgn015342	0.056515	0.10015	1959
BMgn014430	0.056558	0.13409	1960
BMgn016615	0.0566	0.10028	1961
BMgn012835	0.056653	0.10037	1962
BMgn004182	0.056654	0.16099	1963
BMgn005438	0.056662	0.05658	1964
BMgn007575	0.056748	0.1678	1965
BMgn006208	0.056773	0.10057	1966
BMgn017017	0.05678	0.10058	1967
BMgn013627	0.056788	0.16132	1968
BMgn004638	0.056799	0.13459	1969
BMgn015847	0.056832	0.10067	1970
BMgn010543	0.056882	0.13477	1971
BMgn008898	0.056897	0.1348	1972
BMgn013803	0.05696	0.13493	1973
BMgn015321	0.056994	0.056923	1974
BMgn008502	0.056997	0.16834	1975
BMgn009768	0.057016	0.056947	1976
BMgn012981	0.057044	0.10102	1977
BMgn010720	0.057047	0.1351	1978
BMgn004703	0.057117	0.10116	1979
BMgn005219	0.057129	0.16215	1980
BMgn000084	0.05716	0.10123	1981
BMgn014785	0.057171	0.16225	1982
BMgn000358	0.057245	0.10137	1983
BMgn007670	0.057274	0.16894	1984
BMgn005439	0.057282	0.057222	1985
BMgn016883	0.057303	0.13564	1986
BMgn010955	0.05733	0.10151	1987
BMgn010408	0.057343	0.13572	1988
BMgn011054	0.057351	0.16909	1989
BMgn003924	0.057473	0.136	1990
BMgn011907	0.057494	0.13604	1991
BMgn000845	0.057592	0.057536	1992
BMgn014792	0.057609	0.16962	1993
BMgn012088	0.057627	0.10199	1994
BMgn006498	0.057658	0.057594	1995
BMgn015498	0.057701	0.10211	1996
BMgn004620	0.057709	0.16365	1997
BMgn012308	0.057727	0.16368	1998
BMgn010565	0.05775	0.13655	1999
[truncated: 13,974 more rows]

## Sheet: growth-restricting genes rank
Gene ID	pos|score	pos|p-value	pos|rank
BMgn003532	3.47e-05	0.00012304	1
BMgn005700	3.55e-05	0.00011622	2
BMgn002834	4.43e-05	0.00015713	3
BMgn001412	5.95e-05	0.0002185	4
BMgn017231	0.000118	0.00022098	5
BMgn011281	0.00016609	0.00077699	6
BMgn015482	0.00020413	0.00061211	7
BMgn008020	0.0002298	0.00045653	8
BMgn002495	0.0002436	0.00048318	9
BMgn016534	0.00024868	0.0007398	10
BMgn000625	0.0002599	0.00094063	11
BMgn009501	0.0002768	0.0012698	12
BMgn003678	0.00027683	0.00027429	13
BMgn008175	0.00029271	0.00086625	14
BMgn007961	0.00029456	0.0010603	15
BMgn013663	0.00031001	0.0011092	16
BMgn010336	0.00035559	0.0012803	17
BMgn013152	0.00037645	0.00072864	18
BMgn006624	0.00037931	0.001359	19
BMgn009482	0.00041957	0.0019287	20
BMgn015194	0.00046044	0.0021103	21
BMgn003364	0.00048319	0.0014254	22
BMgn003328	0.00049775	0.0014582	23
BMgn001466	0.0005093	0.00096977	24
BMgn011371	0.00052979	0.0018977	25
BMgn015382	0.00053102	0.0015481	26
BMgn017188	0.00055577	0.0010565	27
BMgn012357	0.00057568	0.0020663	28
BMgn000687	0.00057898	0.0010962	29
BMgn017591	0.00059579	0.0017353	30
BMgn003441	0.00060594	0.001147	31
BMgn011045	0.0006213	0.0011799	32
BMgn016913	0.0006588	0.0023669	33
BMgn015796	0.00066309	0.0019355	34
BMgn005679	0.00066423	0.0023868	35
BMgn012600	0.00067547	0.00068401	36
BMgn010850	0.00069745	0.0020241	37
BMgn012332	0.00074398	0.0021599	38
BMgn015023	0.00074951	0.0026762	39
BMgn010196	0.00080919	0.0028845	40
BMgn002625	0.00081925	0.0015407	41
BMgn001739	0.00087926	0.0025337	42
BMgn009346	0.00089588	0.0036376	43
BMgn015679	0.00089666	0.002587	44
BMgn016256	0.00091553	0.0026421	45
BMgn012992	0.00093699	0.0027085	46
BMgn014728	0.00095207	0.0017967	47
BMgn002850	0.0010093	0.0019126	48
BMgn012074	0.001022	0.0019417	49
BMgn013084	0.0010515	0.0042122	50
BMgn015404	0.0010583	0.0030612	51
BMgn015147	0.0010958	0.0031802	52
BMgn005555	0.0011045	0.0032106	53
BMgn016701	0.0011387	0.0032998	54
BMgn011923	0.0011686	0.0046158	55
BMgn012006	0.0011867	0.0022678	56
BMgn008307	0.0012084	0.0034926	57
BMgn000750	0.001214	0.0043641	58
BMgn006636	0.0013062	0.0024909	59
BMgn006252	0.0013614	0.0038961	60
BMgn007478	0.0013724	0.0049238	61
BMgn008865	0.0013947	0.0026583	62
BMgn008057	0.0014143	0.0040182	63
BMgn016846	0.0014284	0.0014099	64
BMgn005271	0.001439	0.0027357	65
BMgn012392	0.0014917	0.0042352	66
BMgn016885	0.0014927	0.0042383	67
BMgn008185	0.0014941	0.0042457	68
BMgn003698	0.0014949	0.00147	69
BMgn004414	0.0015392	0.0015121	70
BMgn008289	0.0015493	0.0055511	71
BMgn004066	0.0016008	0.0057179	72
BMgn010763	0.0016082	0.005747	73
BMgn005858	0.0016245	0.0058028	74
BMgn011809	0.0016534	0.0047112	75
BMgn000278	0.0016657	0.0047546	76
BMgn015296	0.0016932	0.0048358	77
BMgn008879	0.0017105	0.0032874	78
BMgn007298	0.001731	0.0049325	79
BMgn004521	0.0017488	0.0033637	80
BMgn005416	0.0017516	0.0062665	81
BMgn013531	0.0017548	0.0033754	82
BMgn012439	0.0017596	0.0050112	83
BMgn002062	0.0017641	0.0063185	84
BMgn010550	0.0018083	0.0067896	85
BMgn007915	0.0018164	0.0064939	86
BMgn014833	0.0018168	0.0051712	87
BMgn005852	0.0018245	0.0051916	88
BMgn011919	0.0018373	0.0035484	89
BMgn017252	0.0018507	0.0066229	90
BMgn014020	0.0018948	0.0053819	91
BMgn005183	0.0018989	0.0053925	92
BMgn003430	0.0019183	0.0054495	93
BMgn007980	0.0019252	0.0081341	94
BMgn017484	0.0019258	0.0037275	95
BMgn004537	0.0019355	0.0037474	96
BMgn000297	0.0019701	0.0038261	97
BMgn017348	0.0020043	0.003893	98
BMgn014433	0.0020254	0.0075142	99
BMgn012916	0.0020385	0.0057823	100
BMgn015993	0.0020408	0.007562	101
BMgn000948	0.0020586	0.0040015	102
BMgn014775	0.0020612	0.0076289	103
BMgn000237	0.0020675	0.0073853	104
BMgn009957	0.0020801	0.0074256	105
BMgn001409	0.0021028	0.0040858	106
BMgn015649	0.0021037	0.0059485	107
BMgn004972	0.0021574	0.0079506	108
BMgn005044	0.0021619	0.0042029	109
BMgn008157	0.0021654	0.0079766	110
BMgn014893	0.002177	0.0077739	111
BMgn015371	0.0021978	0.0078341	112
BMgn003589	0.0022441	0.0063309	113
BMgn006280	0.0022778	0.0080696	114
BMgn013813	0.0022798	0.0044255	115
BMgn009006	0.0023022	0.008413	116
BMgn010413	0.0023187	0.006533	117
BMgn013758	0.0023437	0.0082395	118
BMgn003490	0.0023555	0.004573	119
BMgn000139	0.0023567	0.0066501	120
BMgn010090	0.0024339	0.00847	121
BMgn004200	0.0024722	0.0069477	122
BMgn015881	0.0025223	0.0086895	123
BMgn001533	0.0025879	0.0072818	124
BMgn016237	0.0026032	0.0073196	125
BMgn014131	0.0026436	0.0074299	126
BMgn006031	0.0026884	0.0075539	127
BMgn015457	0.0027039	0.0091308	128
BMgn007516	0.00271	0.0097872	129
BMgn007612	0.0027664	0.0053199	130
BMgn005977	0.0027737	0.011258	131
BMgn007808	0.0028615	0.0080417	132
BMgn003251	0.0028624	0.0080442	133
BMgn015942	0.0028688	0.0055028	134
BMgn014108	0.0028704	0.0080684	135
BMgn010975	0.0028786	0.010346	136
BMgn004602	0.0028991	0.0055598	137
BMgn008835	0.0028991	0.0081459	138
BMgn013619	0.0029643	0.0098027	139
BMgn007025	0.0029933	0.0084056	140
BMgn012178	0.0030199	0.0084756	141
BMgn006736	0.0030308	0.0099633	142
BMgn002000	0.0030568	0.0058419	143
BMgn000933	0.0030889	0.010098	144
BMgn017556	0.0031202	0.0059677	145
BMgn002910	0.0031208	0.0059683	146
BMgn016244	0.0031445	0.011194	147
BMgn009747	0.0031567	0.010268	148
BMgn012450	0.0031644	0.0060514	149
BMgn002666	0.0032223	0.0031944	150
BMgn013466	0.0032614	0.010552	151
BMgn009022	0.0032887	0.0032471	152
BMgn014611	0.0032909	0.0092002	153
BMgn015563	0.0033065	0.011726	154
BMgn011820	0.0033178	0.01069	155
BMgn007093	0.0033211	0.0092771	156
BMgn014851	0.0033452	0.010752	157
BMgn007552	0.0033835	0.0064685	158
BMgn003119	0.0033846	0.0094451	159
BMgn005911	0.0033855	0.0064704	160
BMgn008711	0.0034062	0.010889	161
BMgn014892	0.003408	0.009499	162
BMgn004955	0.0034431	0.010975	163
BMgn003187	0.0034631	0.0096472	164
BMgn007925	0.003484	0.0097036	165
BMgn015447	0.0035182	0.0067177	166
BMgn012396	0.0035512	0.012521	167
BMgn003771	0.0035548	0.011259	168
BMgn016700	0.0035584	0.0099125	169
BMgn001907	0.0035988	0.0035614	170
BMgn007922	0.0036032	0.010025	171
BMgn010288	0.0036066	0.0068851	172
BMgn014360	0.0036508	0.0069756	173
BMgn002541	0.0036648	0.0069991	174
BMgn004555	0.0037267	0.014176	175
BMgn001722	0.0037321	0.011687	176
BMgn000450	0.0037596	0.01175	177
BMgn011946	0.0038037	0.010583	178
BMgn012024	0.003828	0.010645	179
BMgn016040	0.0038431	0.011964	180
BMgn003671	0.0038817	0.010808	181
BMgn005531	0.0038919	0.010844	182
BMgn000775	0.0039479	0.010985	183
BMgn014772	0.0039517	0.0075471	184
BMgn016758	0.0039523	0.013803	185
BMgn011171	0.0039991	0.012338	186
BMgn007388	0.0040352	0.014057	187
BMgn017370	0.004086	0.0040424	188
BMgn013416	0.0041138	0.012628	189
BMgn013584	0.0041853	0.014545	190
BMgn008701	0.0042149	0.0080485	191
BMgn006233	0.0042205	0.011724	192
BMgn014698	0.004241	0.0042048	193
BMgn011330	0.0042542	0.011823	194
BMgn006559	0.0042697	0.0081545	195
BMgn005374	0.0042895	0.013071	196
BMgn008999	0.0043007	0.014946	197
BMgn009852	0.0043074	0.0082277	198
BMgn007576	0.0043075	0.0042612	199
BMgn008129	0.0043103	0.0082326	200
BMgn014920	0.004398	0.008387	201
BMgn014923	0.0044084	0.015272	202
BMgn012469	0.0044304	0.0084446	203
BMgn016027	0.0044311	0.012322	204
BMgn013700	0.0044394	0.013433	205
BMgn000868	0.0044451	0.0084694	206
BMgn013476	0.0045052	0.015608	207
BMgn012518	0.0045286	0.01259	208
BMgn008331	0.0045349	0.0086368	209
BMgn001964	0.004594	0.0087298	210
BMgn017105	0.0046447	0.013954	211
BMgn001944	0.0046674	0.0088556	212
BMgn014731	0.0046831	0.01406	213
BMgn012337	0.0047027	0.0089287	214
BMgn015781	0.0047712	0.016512	215
BMgn011808	0.0048	0.0091259	216
BMgn011515	0.0048091	0.013328	217
BMgn001171	0.0048123	0.0144	218
BMgn016993	0.0048192	0.014414	219
BMgn016907	0.0048436	0.013423	220
BMgn005584	0.0048442	0.0092021	221
BMgn007322	0.0048497	0.0092157	222
BMgn008555	0.004854	0.013451	223
BMgn016444	0.0048833	0.004816	224
BMgn007378	0.0049416	0.013692	225
BMgn010722	0.0049555	0.014767	226
BMgn006030	0.0050513	0.014995	227
BMgn003124	0.0050651	0.0096515	228
BMgn017414	0.0052133	0.014437	229
BMgn012394	0.0052155	0.0051557	230
BMgn000536	0.0052191	0.01445	231
BMgn000831	0.0052231	0.015413	232
BMgn008806	0.0052365	0.018045	233
BMgn016309	0.005286	0.010049	234
BMgn014047	0.0053041	0.0052474	235
BMgn006391	0.0053201	0.010115	236
BMgn015163	0.0054052	0.015856	237
BMgn014806	0.0054101	0.015869	238
BMgn002750	0.0054403	0.015044	239
BMgn003740	0.0054862	0.010408	240
BMgn003646	0.0055795	0.019196	241
BMgn011367	0.0055858	0.019211	242
BMgn004000	0.0055952	0.010607	243
BMgn016134	0.0056036	0.015469	244
BMgn017032	0.0056133	0.016385	245
BMgn004953	0.0056293	0.016429	246
BMgn013115	0.0056336	0.015548	247
BMgn010151	0.0056698	0.015641	248
BMgn002597	0.0057936	0.015967	249
BMgn006900	0.0058577	0.005809	250
BMgn001219	0.0058684	0.01617	251
BMgn000296	0.0058742	0.020157	252
BMgn005576	0.005878	0.017096	253
BMgn015004	0.0059345	0.016342	254
BMgn001941	0.0059615	0.017298	255
BMgn009548	0.006034	0.016584	256
BMgn004274	0.0060543	0.017519	257
BMgn006715	0.0060627	0.016655	258
BMgn009306	0.0060649	0.016661	259
BMgn002016	0.0060753	0.011501	260
BMgn009580	0.006081	0.011507	261
BMgn017127	0.0060918	0.016733	262
BMgn015525	0.0061305	0.020986	263
BMgn011216	0.0061331	0.016848	264
BMgn014718	0.0061678	0.0061202	265
BMgn004718	0.0061728	0.017816	266
BMgn000963	0.0061992	0.017034	267
BMgn008484	0.0062002	0.011732	268
BMgn002201	0.0062407	0.021294	269
BMgn000611	0.0062729	0.017232	270
BMgn013982	0.0063463	0.021627	271
BMgn010356	0.0064077	0.012106	272
BMgn002757	0.0064269	0.017651	273
BMgn014251	0.0064639	0.017747	274
BMgn012108	0.0064784	0.012228	275
BMgn012366	0.0064829	0.017786	276
BMgn002483	0.0064952	0.018593	277
BMgn014176	0.0065285	0.017899	278
BMgn014591	0.00653	0.017902	279
BMgn010437	0.0065458	0.018711	280
BMgn013734	0.0065897	0.022396	281
BMgn001069	0.0065898	0.018054	282
BMgn003594	0.0066108	0.01249	283
BMgn014129	0.0066623	0.018256	284
BMgn007508	0.0066692	0.012601	285
BMgn008828	0.0066715	0.019005	286
BMgn012081	0.0066814	0.02267	287
BMgn016894	0.0066993	0.0066539	288
BMgn005820	0.0067599	0.012764	289
BMgn009191	0.0067617	0.018512	290
BMgn012646	0.0067915	0.022992	291
BMgn005745	0.0068607	0.018788	292
BMgn010965	0.0069187	0.019598	293
BMgn016487	0.0069258	0.019621	294
BMgn006343	0.0069261	0.019621	295
BMgn006891	0.0069359	0.019642	296
BMgn015177	0.006964	0.013137	297
BMgn009800	0.0069653	0.019717	298
BMgn010996	0.0070108	0.019188	299
BMgn003241	0.0070289	0.019231	300
BMgn000334	0.0070731	0.019342	301
BMgn004923	0.007088	0.024314	302
BMgn010719	0.0071244	0.019477	303
BMgn008781	0.0071405	0.013436	304
BMgn009720	0.0071422	0.0071002	305
BMgn000350	0.0071687	0.019599	306
BMgn011491	0.0071786	0.01963	307
BMgn005717	0.0071984	0.019686	308
BMgn004026	0.0072341	0.013592	309
BMgn013535	0.0072378	0.013599	310
BMgn016290	0.0072454	0.013611	311
BMgn001695	0.0072492	0.013622	312
BMgn009236	0.0072922	0.020508	313
BMgn014394	0.0072979	0.019931	314
BMgn006037	0.0074494	0.013991	315
BMgn006282	0.0074523	0.0073983	316
BMgn017403	0.0075349	0.025225	317
BMgn013210	0.0075503	0.021128	318
BMgn005185	0.007561	0.025293	319
BMgn004054	0.007563	0.0075006	320
BMgn011062	0.0076123	0.020766	321
BMgn012725	0.0076196	0.01432	322
BMgn012528	0.00767	0.01441	323
BMgn011713	0.0076931	0.021472	324
BMgn001939	0.0077126	0.021518	325
BMgn005305	0.0077142	0.014489	326
BMgn009740	0.0077777	0.021682	327
BMgn016429	0.0078024	0.014664	328
BMgn001387	0.0078465	0.014737	329
BMgn015531	0.007873	0.014781	330
BMgn010401	0.0078785	0.021936	331
BMgn004959	0.0079439	0.014905	332
BMgn009894	0.0079846	0.021757	333
BMgn013446	0.0079997	0.022216	334
BMgn003021	0.0080507	0.021938	335
BMgn010323	0.0080649	0.021975	336
BMgn016990	0.008081	0.022405	337
BMgn016640	0.0081185	0.015233	338
BMgn000952	0.0082489	0.022448	339
BMgn010735	0.0082877	0.015551	340
BMgn013897	0.0083451	0.023041	341
BMgn011372	0.0083606	0.022748	342
BMgn002066	0.0083936	0.022822	343
BMgn014456	0.0084464	0.028098	344
BMgn011646	0.0084632	0.023319	345
BMgn009382	0.008471	0.008426	346
BMgn008155	0.0085132	0.02313	347
BMgn010327	0.0085481	0.023218	348
BMgn009216	0.0085523	0.028425	349
BMgn007331	0.0085792	0.023303	350
BMgn009750	0.0086345	0.023439	351
BMgn003849	0.0086598	0.023504	352
BMgn008321	0.0086846	0.016315	353
BMgn001001	0.0086925	0.008651	354
BMgn008727	0.008698	0.023892	355
BMgn011556	0.0087104	0.023929	356
BMgn014280	0.0087287	0.016401	357
BMgn008973	0.0087852	0.024123	358
BMgn007063	0.0087909	0.023831	359
BMgn008388	0.0088434	0.023975	360
BMgn015246	0.008861	0.016652	361
BMgn014602	0.0088778	0.016685	362
BMgn005682	0.0088846	0.024387	363
BMgn015303	0.0089064	0.029501	364
BMgn001402	0.0089095	0.024143	365
BMgn010959	0.0089139	0.0088562	366
BMgn004111	0.0089755	0.024327	367
BMgn004110	0.0090413	0.016979	368
BMgn008280	0.0091017	0.024896	369
BMgn010708	0.0091192	0.024698	370
BMgn005778	0.009212	0.030393	371
BMgn013852	0.0092251	0.025201	372
BMgn015790	0.0093717	0.025364	373
BMgn017067	0.0093818	0.025598	374
BMgn009975	0.0094156	0.030832	375
BMgn010786	0.009469	0.02582	376
BMgn003772	0.00948	0.025631	377
BMgn010726	0.009482	0.025636	378
BMgn014204	0.0095038	0.025695	379
BMgn002794	0.0095417	0.031121	380
BMgn016545	0.0095667	0.017969	381
BMgn009876	0.0095755	0.025873	382
BMgn015643	0.0095828	0.02589	383
BMgn015005	0.0095928	0.018018	384
BMgn014272	0.0096356	0.026026	385
BMgn016678	0.0096516	0.031355	386
BMgn008979	0.0096769	0.026145	387
BMgn002233	0.0097102	0.018257	388
BMgn016829	0.0097322	0.026279	389
BMgn015243	0.0097716	0.026393	390
BMgn002014	0.0097868	0.0184	391
BMgn006682	0.0097933	0.018413	392
BMgn000022	0.0098005	0.026471	393
BMgn011471	0.009866	0.026629	394
BMgn013452	0.0098663	0.02663	395
BMgn007096	0.0099287	0.026914	396
BMgn011098	0.0099658	0.026878	397
BMgn001193	0.0099837	0.026922	398
BMgn008578	0.010043	0.0099881	399
BMgn002803	0.010056	0.032255	400
BMgn008605	0.010082	0.027174	401
BMgn006561	0.010098	0.027215	402
BMgn001037	0.010228	0.019225	403
BMgn015741	0.010264	0.027691	404
BMgn000267	0.010287	0.010235	405
BMgn012197	0.010316	0.01938	406
BMgn004542	0.010362	0.027761	407
BMgn017258	0.010398	0.010349	408
BMgn006857	0.010456	0.028148	409
BMgn016248	0.010456	0.028149	410
BMgn000063	0.010492	0.019711	411
BMgn011742	0.010494	0.027964	412
BMgn003855	0.010624	0.019966	413
BMgn009898	0.010664	0.028245	414
BMgn008636	0.010665	0.028626	415
BMgn009729	0.010708	0.010642	416
BMgn007945	0.010712	0.020151	417
BMgn015091	0.010725	0.028344	418
BMgn000764	0.010771	0.028419	419
BMgn008690	0.010774	0.028884	420
BMgn006503	0.010779	0.028902	421
BMgn005372	0.010794	0.028449	422
BMgn001094	0.010841	0.010777	423
BMgn004386	0.010861	0.034067	424
BMgn001880	0.010885	0.010817	425
BMgn008983	0.010889	0.028627	426
BMgn016359	0.010997	0.035839	427
BMgn005910	0.011021	0.028847	428
BMgn011299	0.011062	0.01099	429
BMgn007853	0.011071	0.029601	430
BMgn013163	0.011112	0.034645	431
BMgn006521	0.011136	0.029764	432
BMgn011162	0.011167	0.020987	433
BMgn002337	0.011285	0.021222	434
BMgn003180	0.011329	0.021305	435
BMgn005560	0.011351	0.029354	436
BMgn014001	0.011416	0.03528	437
BMgn016382	0.011461	0.021565	438
BMgn012479	0.011576	0.030776	439
BMgn012597	0.011598	0.030834	440
BMgn001841	0.011637	0.021908	441
BMgn011086	0.011721	0.031106	442
BMgn001657	0.011725	0.022072	443
BMgn011451	0.011729	0.029968	444
BMgn007337	0.011736	0.031136	445
BMgn017449	0.011737	0.035978	446
BMgn008683	0.011774	0.022166	447
BMgn013467	0.011777	0.030045	448
BMgn010278	0.011831	0.031356	449
BMgn005485	0.011907	0.031547	450
BMgn003227	0.011942	0.022471	451
BMgn010252	0.011989	0.022556	452
BMgn014146	0.012034	0.036628	453
BMgn002293	0.012037	0.031862	454
BMgn015478	0.012054	0.022673	455
BMgn000150	0.012065	0.030506	456
BMgn008255	0.012076	0.030525	457
BMgn006527	0.012121	0.022809	458
BMgn017509	0.01217	0.030677	459
BMgn009758	0.012213	0.032276	460
BMgn010739	0.012219	0.030752	461
BMgn015152	0.012255	0.032382	462
BMgn006746	0.012274	0.030837	463
BMgn012975	0.01234	0.030939	464
BMgn006694	0.012342	0.023203	465
BMgn003600	0.012391	0.0123	466
BMgn009076	0.012474	0.023461	467
BMgn004733	0.012496	0.031203	468
BMgn000968	0.012537	0.03127	469
BMgn004074	0.012603	0.031359	470
BMgn007632	0.012606	0.023703	471
BMgn010686	0.012694	0.023877	472
BMgn004618	0.012724	0.03348	473
BMgn003202	0.012735	0.031585	474
BMgn003588	0.01279	0.024056	475
BMgn002297	0.012793	0.033643	476
BMgn011042	0.012958	0.024351	477
BMgn003949	0.013002	0.024421	478
BMgn007801	0.013003	0.034167	479
BMgn016612	0.013014	0.034194	480
BMgn014671	0.013022	0.034216	481
BMgn013393	0.01309	0.024578	482
BMgn004628	0.01313	0.032219	483
BMgn003058	0.013137	0.024669	484
BMgn015311	0.013165	0.034544	485
BMgn006872	0.013178	0.024736	486
BMgn003145	0.013259	0.034761	487
BMgn010731	0.013277	0.032457	488
BMgn011259	0.013353	0.034997	489
BMgn013501	0.013394	0.032658	490
BMgn008817	0.013444	0.035204	491
BMgn012914	0.01346	0.032765	492
BMgn011950	0.013476	0.013351	493
BMgn002815	0.013511	0.025313	494
BMgn008927	0.013525	0.032855	495
BMgn014256	0.013529	0.035402	496
BMgn008900	0.013573	0.025428	497
BMgn015782	0.013616	0.0356	498
BMgn004598	0.013706	0.025682	499
BMgn016520	0.013707	0.025683	500
BMgn009295	0.013753	0.035937	501
BMgn002596	0.013836	0.040652	502
BMgn004235	0.013838	0.0259	503
BMgn008668	0.013855	0.033382	504
BMgn012648	0.013926	0.026054	505
BMgn010713	0.013959	0.036439	506
BMgn012688	0.013985	0.013858	507
BMgn001454	0.013986	0.033597	508
BMgn007896	0.013986	0.033598	509
BMgn002411	0.013994	0.026176	510
BMgn003496	0.01403	0.013901	511
BMgn001449	0.014039	0.041085	512
BMgn002928	0.014118	0.033823	513
BMgn016015	0.014142	0.036892	514
BMgn003045	0.014184	0.033928	515
BMgn007751	0.014249	0.034042	516
BMgn010694	0.014315	0.034148	517
BMgn011038	0.014367	0.04181	518
BMgn005828	0.014384	0.026906	519
BMgn012310	0.014553	0.034527	520
BMgn011773	0.014572	0.037955	521
BMgn006249	0.014581	0.037975	522
BMgn004291	0.014585	0.027246	523
BMgn002793	0.014586	0.042286	524
BMgn000118	0.014592	0.027259	525
BMgn006116	0.01465	0.034689	526
BMgn015935	0.01465	0.014526	527
BMgn007016	0.014673	0.027404	528
BMgn006186	0.014716	0.04257	529
BMgn009108	0.014732	0.027516	530
BMgn003487	0.014732	0.038317	531
BMgn007001	0.014739	0.038339	532
BMgn015845	0.014745	0.038355	533
BMgn015030	0.014809	0.03493	534
BMgn008874	0.014862	0.035024	535
BMgn001622	0.014893	0.014794	536
BMgn000366	0.014907	0.035094	537
BMgn002165	0.014931	0.038821	538
BMgn007784	0.014973	0.03521	539
BMgn002798	0.015025	0.028051	540
BMgn005718	0.015026	0.014929	541
BMgn014561	0.015113	0.028211	542
BMgn013493	0.015127	0.039294	543
BMgn015126	0.015154	0.028275	544
BMgn009456	0.015194	0.039431	545
BMgn003080	0.015236	0.035646	546
BMgn012290	0.015339	0.039789	547
BMgn000181	0.015352	0.043947	548
BMgn013545	0.015461	0.044187	549
BMgn000715	0.015528	0.036088	550
BMgn014229	0.015538	0.028988	551
BMgn004527	0.015604	0.029111	552
BMgn000614	0.015609	0.036238	553
BMgn002717	0.015682	0.029266	554
BMgn005172	0.015691	0.036375	555
BMgn010030	0.015719	0.0407	556
BMgn011746	0.015728	0.02935	557
BMgn016434	0.015932	0.029709	558
BMgn012779	0.015957	0.041251	559
BMgn006384	0.015982	0.041323	560
BMgn016743	0.016044	0.029903	561
BMgn003586	0.016091	0.037013	562
BMgn005688	0.016124	0.030036	563
BMgn001148	0.016157	0.037128	564
BMgn001986	0.016222	0.016121	565
BMgn001274	0.016288	0.037365	566
BMgn006386	0.016299	0.050943	567
BMgn006444	0.016309	0.030363	568
BMgn015130	0.016354	0.037476	569
BMgn014813	0.016419	0.037583	570
BMgn017234	0.016439	0.037613	571
BMgn011147	0.016593	0.030861	572
BMgn002414	0.016617	0.037904	573
BMgn011939	0.016641	0.046765	574
BMgn014093	0.016643	0.016584	575
BMgn016035	0.016702	0.031044	576
BMgn007345	0.016706	0.043007	577
BMgn007805	0.016748	0.038118	578
BMgn016036	0.016861	0.038283	579
BMgn012913	0.016885	0.031385	580
BMgn004475	0.016895	0.043443	581
BMgn000475	0.016907	0.043473	582
BMgn012082	0.016951	0.043592	583
BMgn015842	0.016958	0.031513	584
BMgn014818	0.016982	0.047522	585
BMgn006798	0.017031	0.038541	586
BMgn010071	0.017046	0.031684	587
BMgn015185	0.01706	0.053078	588
BMgn002658	0.017069	0.038592	589
BMgn009640	0.017193	0.038816	590
BMgn011830	0.017206	0.044186	591
BMgn009744	0.017208	0.03884	592
BMgn007046	0.017212	0.038844	593
BMgn015366	0.017227	0.032023	594
BMgn009379	0.017265	0.032101	595
BMgn012577	0.01732	0.044454	596
BMgn010488	0.017352	0.01731	597
BMgn011765	0.017436	0.048498	598
BMgn014074	0.017485	0.032504	599
BMgn012993	0.017528	0.039366	600
BMgn008993	0.017537	0.048701	601
BMgn015771	0.01764	0.017607	602
BMgn014371	0.017682	0.039625	603
BMgn015222	0.017696	0.045336	604
BMgn014804	0.017711	0.039687	605
BMgn014661	0.017759	0.039764	606
BMgn010464	0.017789	0.033049	607
BMgn001322	0.017836	0.033129	608
BMgn008288	0.017839	0.017793	609
BMgn005998	0.017864	0.039932	610
BMgn007642	0.017929	0.049541	611
BMgn010840	0.017974	0.04964	612
BMgn000689	0.017996	0.040136	613
BMgn014487	0.018012	0.033437	614
BMgn009571	0.018015	0.049732	615
BMgn014144	0.01806	0.018018	616
BMgn009496	0.0181	0.033605	617
BMgn016493	0.018168	0.046446	618
BMgn008309	0.018168	0.040398	619
BMgn008247	0.018187	0.033758	620
BMgn005481	0.018193	0.040449	621
BMgn003934	0.018247	0.046637	622
BMgn005586	0.018255	0.046658	623
BMgn006053	0.018258	0.04055	624
BMgn006763	0.01826	0.018202	625
BMgn005356	0.018274	0.046699	626
BMgn014522	0.018275	0.033911	627
BMgn014832	0.018294	0.046745	628
BMgn017033	0.018313	0.033983	629
BMgn013629	0.018325	0.040659	630
BMgn011187	0.018343	0.046858	631
BMgn003092	0.018343	0.03404	632
BMgn001299	0.01837	0.018317	633
BMgn015929	0.018411	0.050612	634
BMgn014971	0.018413	0.047021	635
BMgn010167	0.018433	0.040825	636
BMgn017244	0.018538	0.034393	637
BMgn010508	0.018561	0.041031	638
BMgn002033	0.018567	0.047382	639
BMgn012948	0.018586	0.041074	640
BMgn009707	0.018688	0.047662	641
BMgn004843	0.018703	0.018676	642
BMgn008694	0.018714	0.03469	643
BMgn012743	0.018718	0.04131	644
BMgn007580	0.018738	0.051358	645
BMgn004637	0.018747	0.047807	646
BMgn008697	0.018769	0.018737	647
BMgn017194	0.018803	0.047942	648
BMgn008961	0.018832	0.034908	649
BMgn004631	0.018914	0.041635	650
BMgn017512	0.018942	0.035092	651
BMgn013310	0.01895	0.051802	652
BMgn000961	0.019033	0.048505	653
BMgn002080	0.019058	0.041858	654
BMgn010377	0.019088	0.041903	655
BMgn005447	0.019153	0.035467	656
BMgn003449	0.019218	0.04211	657
BMgn015416	0.019303	0.049154	658
BMgn014149	0.019328	0.03577	659
BMgn013990	0.019372	0.035855	660
BMgn009636	0.019375	0.049326	661
BMgn010620	0.019377	0.035864	662
BMgn013793	0.019416	0.035937	663
BMgn008238	0.01946	0.036001	664
BMgn015870	0.019465	0.049556	665
BMgn010536	0.019505	0.042573	666
BMgn015510	0.019565	0.04978	667
BMgn001626	0.019591	0.042713	668
BMgn002170	0.019652	0.049968	669
BMgn010899	0.019666	0.049991	670
BMgn001233	0.019679	0.036394	671
BMgn008693	0.019719	0.053445	672
BMgn011260	0.01974	0.050162	673
BMgn011886	0.019761	0.036556	674
BMgn006348	0.019828	0.053691	675
BMgn010585	0.019867	0.036758	676
BMgn011877	0.019939	0.0611	677
BMgn006512	0.01997	0.053999	678
BMgn011964	0.020001	0.050763	679
BMgn005304	0.020029	0.043441	680
BMgn016654	0.020089	0.050976	681
BMgn015963	0.020091	0.043553	682
BMgn002968	0.020161	0.037285	683
BMgn011738	0.020187	0.037329	684
BMgn011152	0.020226	0.043805	685
BMgn017413	0.020262	0.037466	686
BMgn006501	0.020326	0.051514	687
BMgn010909	0.02035	0.051583	688
BMgn006972	0.020375	0.062279	689
BMgn002171	0.02043	0.020418	690
BMgn002229	0.020438	0.05179	691
BMgn017144	0.020452	0.037807	692
BMgn005786	0.020461	0.051844	693
BMgn006517	0.020541	0.020519	694
BMgn014596	0.020556	0.037999	695
BMgn005639	0.020575	0.044408	696
BMgn003536	0.020586	0.044425	697
BMgn007065	0.020653	0.055453	698
BMgn008691	0.020699	0.055549	699
BMgn017112	0.020706	0.038279	700
BMgn001313	0.02075	0.044702	701
BMgn011344	0.020787	0.052586	702
BMgn009484	0.020856	0.044882	703
BMgn016017	0.020863	0.038562	704
BMgn005502	0.020891	0.052814	705
BMgn015628	0.02095	0.045024	706
BMgn006756	0.020961	0.052976	707
BMgn010135	0.02097	0.05299	708
BMgn013903	0.020971	0.04506	709
BMgn008284	0.021012	0.045127	710
BMgn012927	0.021019	0.056237	711
BMgn007544	0.021042	0.053149	712
BMgn000711	0.02109	0.038974	713
BMgn000222	0.021143	0.045358	714
BMgn006406	0.021203	0.053536	715
BMgn012803	0.021244	0.056727	716
BMgn015391	0.021329	0.039364	717
BMgn003040	0.021349	0.045685	718
BMgn000964	0.021356	0.053872	719
BMgn005436	0.021405	0.045788	720
BMgn006337	0.021429	0.05403	721
BMgn015226	0.021497	0.045928	722
BMgn011729	0.021536	0.045996	723
BMgn015119	0.021563	0.0398	724
BMgn003150	0.021571	0.054378	725
BMgn016135	0.021588	0.057443	726
BMgn007691	0.021653	0.05455	727
BMgn016522	0.02175	0.057785	728
BMgn016457	0.021814	0.054948	729
BMgn017604	0.021825	0.021795	730
BMgn006744	0.021863	0.046531	731
BMgn008096	0.021871	0.040354	732
BMgn001410	0.021897	0.058101	733
BMgn016451	0.02192	0.055178	734
BMgn009168	0.021976	0.066685	735
BMgn003659	0.021994	0.046767	736
BMgn002526	0.02206	0.046868	737
BMgn013155	0.022118	0.055609	738
BMgn016742	0.022133	0.040872	739
BMgn003208	0.022181	0.05576	740
BMgn010047	0.022222	0.05876	741
BMgn008031	0.022232	0.047142	742
BMgn007328	0.022253	0.055929	743
BMgn010215	0.022256	0.047178	744
BMgn017397	0.022291	0.041163	745
BMgn011163	0.022352	0.041269	746
BMgn017093	0.022355	0.056143	747
BMgn006541	0.022362	0.047339	748
BMgn006719	0.022396	0.04134	749
BMgn015752	0.022436	0.059199	750
BMgn000307	0.02248	0.04754	751
BMgn000975	0.022503	0.04154	752
BMgn016858	0.022524	0.047605	753
BMgn009406	0.022598	0.056712	754
BMgn005429	0.022612	0.059571	755
BMgn014943	0.022649	0.047803	756
BMgn005204	0.022684	0.059729	757
BMgn009475	0.022729	0.041971	758
BMgn009289	0.022733	0.057024	759
BMgn012033	0.022769	0.04204	760
BMgn008933	0.02279	0.042082	761
BMgn003121	0.022844	0.022801	762
BMgn005580	0.02286	0.048174	763
BMgn006911	0.02291	0.048247	764
BMgn006657	0.022976	0.048337	765
BMgn007705	0.022988	0.057593	766
BMgn008799	0.022997	0.042457	767
BMgn014898	0.023052	0.057728	768
BMgn010373	0.023053	0.042559	769
BMgn011256	0.023104	0.060665	770
BMgn001593	0.023107	0.048539	771
BMgn005642	0.02314	0.042714	772
BMgn007170	0.023177	0.048644	773
BMgn001913	0.023219	0.058136	774
BMgn016728	0.02322	0.04873	775
BMgn000620	0.023265	0.023218	776
BMgn007039	0.0234	0.058571	777
BMgn004853	0.023403	0.043181	778
BMgn016263	0.023434	0.049063	779
BMgn015924	0.023491	0.043338	780
BMgn011772	0.023506	0.049175	781
BMgn004020	0.023524	0.0434	782
BMgn014100	0.02354	0.070337	783
BMgn004758	0.023564	0.049252	784
BMgn015084	0.023573	0.049265	785
BMgn017057	0.023578	0.043504	786
BMgn003115	0.023606	0.04356	787
BMgn004778	0.02363	0.049364	788
BMgn011347	0.023633	0.043604	789
BMgn000645	0.02366	0.043647	790
BMgn005769	0.023661	0.05916	791
BMgn002728	0.023686	0.023618	792
BMgn013596	0.023695	0.049476	793
BMgn003152	0.023753	0.043835	794
BMgn001864	0.023783	0.043879	795
BMgn008495	0.023796	0.043901	796
BMgn000705	0.023825	0.062181	797
BMgn011825	0.023853	0.062232	798
BMgn003007	0.023885	0.044055	799
BMgn009539	0.023928	0.044124	800
BMgn001484	0.023957	0.049914	801
BMgn011197	0.023972	0.044208	802
BMgn010564	0.024005	0.049992	803
BMgn002047	0.024022	0.050015	804
BMgn005879	0.02405	0.044344	805
BMgn000946	0.024051	0.06003	806
BMgn017011	0.02406	0.044362	807
BMgn016991	0.024077	0.044396	808
BMgn002914	0.024083	0.050123	809
BMgn004415	0.024103	0.04443	810
BMgn009775	0.024153	0.050234	811
BMgn017045	0.024153	0.044523	812
BMgn002338	0.024174	0.060299	813
BMgn012931	0.024191	0.044596	814
BMgn000718	0.024322	0.044814	815
BMgn002637	0.024328	0.060639	816
BMgn004401	0.024337	0.060659	817
BMgn017036	0.024385	0.050617	818
BMgn005784	0.024414	0.050666	819
BMgn000499	0.024419	0.050672	820
BMgn007211	0.024421	0.060857	821
BMgn017602	0.02445	0.045042	822
BMgn011817	0.024497	0.045128	823
BMgn011362	0.024544	0.061132	824
BMgn000424	0.024618	0.061317	825
BMgn003901	0.024693	0.04543	826
BMgn016377	0.0247	0.045446	827
BMgn006932	0.024723	0.051179	828
BMgn004569	0.024806	0.051313	829
BMgn001102	0.024891	0.045778	830
BMgn013252	0.024905	0.061961	831
BMgn011867	0.024937	0.051519	832
BMgn014767	0.024949	0.062067	833
BMgn006410	0.02497	0.02488	834
BMgn015232	0.024978	0.045942	835
BMgn016815	0.024983	0.051599	836
BMgn001272	0.025002	0.051639	837
BMgn009755	0.025066	0.046108	838
BMgn016531	0.025074	0.062338	839
BMgn014709	0.025109	0.04618	840
BMgn006671	0.025133	0.051863	841
BMgn007251	0.025163	0.062564	842
BMgn006587	0.025176	0.046283	843
BMgn001203	0.025188	0.051962	844
BMgn017078	0.025197	0.04633	845
BMgn004337	0.025241	0.04639	846
BMgn010041	0.025264	0.052089	847
BMgn000508	0.025274	0.046451	848
BMgn016171	0.025313	0.062918	849
BMgn006324	0.025401	0.046687	850
BMgn001963	0.025416	0.046709	851
BMgn017581	0.025487	0.063287	852
BMgn003393	0.025503	0.046876	853
BMgn009836	0.025542	0.046949	854
BMgn011709	0.025574	0.06347	855
BMgn002893	0.025698	0.066151	856
BMgn008916	0.025714	0.052796	857
BMgn004735	0.025721	0.052809	858
BMgn010202	0.025762	0.047326	859
BMgn006389	0.025783	0.052913	860
BMgn000315	0.025809	0.047405	861
BMgn003368	0.025862	0.047502	862
BMgn004724	0.025866	0.064125	863
BMgn014947	0.025896	0.047562	864
BMgn016369	0.025898	0.047564	865
BMgn008150	0.025917	0.053122	866
BMgn006936	0.025982	0.05323	867
BMgn014794	0.026033	0.047801	868
BMgn002840	0.026071	0.04786	869
BMgn015681	0.026212	0.048093	870
BMgn011769	0.026308	0.053742	871
BMgn001493	0.026315	0.053753	872
BMgn011720	0.026355	0.065224	873
BMgn004934	0.026372	0.065268	874
BMgn014574	0.026377	0.048383	875
BMgn013472	0.026387	0.065298	876
BMgn017404	0.026454	0.026393	877
BMgn014854	0.026529	0.048653	878
BMgn004483	0.026547	0.067977	879
BMgn006571	0.026581	0.065743	880
BMgn009247	0.026627	0.068161	881
BMgn014253	0.026628	0.068162	882
BMgn015134	0.026659	0.065922	883
BMgn013961	0.026757	0.06613	884
BMgn007428	0.02677	0.054473	885
BMgn016222	0.026841	0.054578	886
BMgn005009	0.026875	0.026812	887
BMgn013736	0.026902	0.049333	888
BMgn000889	0.026909	0.06648	889
BMgn002745	0.026963	0.066597	890
BMgn005517	0.027	0.049495	891
BMgn000321	0.027118	0.027053	892
BMgn011608	0.027131	0.049706	893
BMgn016903	0.027137	0.066995	894
BMgn011181	0.027164	0.049761	895
BMgn008042	0.027193	0.055122	896
BMgn017458	0.027226	0.049886	897
BMgn010922	0.027402	0.067604	898
BMgn014305	0.027419	0.067644	899
BMgn006864	0.027432	0.069897	900
BMgn015959	0.027475	0.05032	901
BMgn001519	0.027477	0.05557	902
BMgn004367	0.027511	0.050377	903
BMgn011488	0.027541	0.05042	904
BMgn011271	0.027548	0.055673	905
BMgn016576	0.027548	0.050437	906
BMgn017552	0.027596	0.055751	907
BMgn008134	0.027601	0.050524	908
BMgn011723	0.027644	0.050589	909
BMgn004311	0.027655	0.055855	910
BMgn010361	0.027718	0.050713	911
BMgn005987	0.027761	0.027685	912
BMgn012275	0.027874	0.056206	913
BMgn001049	0.027917	0.051065	914
BMgn012297	0.028004	0.068989	915
BMgn005424	0.028037	0.051268	916
BMgn012463	0.028057	0.069103	917
BMgn015609	0.02807	0.056517	918
BMgn006759	0.028081	0.051343	919
BMgn005460	0.028134	0.069291	920
BMgn007766	0.028143	0.069301	921
BMgn014311	0.02819	0.071528	922
BMgn000165	0.028193	0.05671	923
BMgn007663	0.028226	0.028154	924
BMgn017429	0.028265	0.056825	925
BMgn003216	0.028289	0.05687	926
BMgn007104	0.028299	0.051726	927
BMgn006507	0.028343	0.051789	928
BMgn002291	0.028351	0.069755	929
BMgn007694	0.028361	0.056985	930
BMgn003311	0.02843	0.051948	931
BMgn005138	0.02843	0.051949	932
BMgn002934	0.028461	0.057151	933
BMgn003808	0.028491	0.028408	934
BMgn003640	0.028526	0.057259	935
BMgn009355	0.028527	0.070149	936
BMgn002467	0.028561	0.052191	937
BMgn007175	0.02858	0.052226	938
BMgn010433	0.028598	0.07239	939
BMgn001470	0.028605	0.052265	940
BMgn014964	0.028623	0.072451	941
BMgn009621	0.028624	0.028526	942
BMgn011726	0.028711	0.070584	943
BMgn010473	0.028721	0.057599	944
BMgn006471	0.028722	0.052488	945
BMgn003574	0.028767	0.052557	946
BMgn003911	0.028784	0.070752	947
BMgn006077	0.028786	0.057694	948
BMgn002673	0.028801	0.07079	949
BMgn017583	0.028846	0.028729	950
BMgn015707	0.028868	0.028759	951
BMgn000121	0.02888	0.057832	952
BMgn000214	0.02889	0.02878	953
BMgn002621	0.02894	0.071129	954
BMgn015380	0.028954	0.052882	955
BMgn010643	0.02897	0.052916	956
BMgn012512	0.029022	0.073278	957
BMgn005670	0.029037	0.071324	958
BMgn014723	0.029046	0.053048	959
BMgn005390	0.029051	0.071358	960
BMgn011036	0.02916	0.058276	961
BMgn007630	0.029216	0.053353	962
BMgn013797	0.029243	0.058406	963
BMgn000633	0.029244	0.029173	964
BMgn014556	0.029282	0.058468	965
BMgn014909	0.029294	0.058489	966
BMgn002117	0.029308	0.058504	967
BMgn002783	0.029368	0.058595	968
BMgn005406	0.02938	0.074012	969
BMgn009950	0.029384	0.072115	970
BMgn015600	0.029478	0.053833	971
BMgn017319	0.029482	0.072302	972
BMgn011539	0.029503	0.058811	973
BMgn004981	0.029522	0.053912	974
BMgn003307	0.029588	0.058946	975
BMgn010015	0.029633	0.059028	976
BMgn001079	0.029691	0.054203	977
BMgn002586	0.029698	0.059129	978
BMgn012848	0.029737	0.072885	979
BMgn007047	0.029785	0.059269	980
BMgn010553	0.029894	0.059421	981
BMgn013400	0.029921	0.07516	982
BMgn001346	0.029931	0.073327	983
BMgn002796	0.029959	0.054642	984
BMgn000610	0.030001	0.054725	985
BMgn008546	0.030024	0.059628	986
BMgn001113	0.030095	0.073686	987
BMgn011119	0.030194	0.073912	988
BMgn001751	0.030231	0.073992	989
BMgn016176	0.030257	0.074044	990
BMgn001651	0.030285	0.074089	991
BMgn012722	0.030307	0.055234	992
BMgn014937	0.03035	0.055299	993
BMgn016731	0.030353	0.076066	994
BMgn004684	0.030415	0.060221	995
BMgn010856	0.03044	0.060252	996
BMgn010794	0.03048	0.060313	997
BMgn004893	0.030498	0.055563	998
BMgn016766	0.030539	0.060409	999
BMgn016895	0.03054	0.074664	1000
BMgn007873	0.030568	0.055692	1001
BMgn011263	0.030603	0.074802	1002
BMgn011290	0.03061	0.060518	1003
BMgn004206	0.030627	0.060551	1004
BMgn012655	0.030664	0.060608	1005
BMgn011833	0.03074	0.060728	1006
BMgn000768	0.03075	0.075136	1007
BMgn000246	0.030753	0.056019	1008
BMgn013375	0.030776	0.060785	1009
BMgn000117	0.030786	0.05608	1010
BMgn011841	0.030795	0.030683	1011
BMgn006285	0.030805	0.060828	1012
BMgn008301	0.030876	0.060953	1013
BMgn007078	0.030893	0.056256	1014
BMgn003102	0.030927	0.030822	1015
BMgn010896	0.030948	0.056335	1016
BMgn003564	0.031069	0.075858	1017
BMgn005296	0.03116	0.077779	1018
BMgn009169	0.031195	0.061458	1019
BMgn016563	0.031248	0.076262	1020
BMgn011807	0.031266	0.056888	1021
BMgn012678	0.031348	0.031234	1022
BMgn009905	0.03139	0.061752	1023
BMgn016966	0.031406	0.076615	1024
BMgn006379	0.031416	0.061801	1025
BMgn001383	0.031456	0.057244	1026
BMgn005744	0.031484	0.0573	1027
BMgn000583	0.031641	0.077112	1028
BMgn006829	0.031651	0.062175	1029
BMgn013651	0.031693	0.057666	1030
BMgn001399	0.031702	0.057677	1031
BMgn006842	0.031728	0.077298	1032
BMgn000328	0.031833	0.057895	1033
BMgn004998	0.031835	0.031756	1034
BMgn016402	0.031846	0.062466	1035
BMgn006039	0.031854	0.077579	1036
BMgn000053	0.031897	0.062539	1037
BMgn003249	0.031911	0.062568	1038
BMgn015339	0.031969	0.077838	1039
BMgn010818	0.031972	0.079485	1040
BMgn009745	0.031977	0.058151	1041
BMgn014660	0.031986	0.062677	1042
BMgn014651	0.032014	0.077926	1043
BMgn011990	0.03205	0.062778	1044
BMgn007233	0.03216	0.078242	1045
BMgn004611	0.032161	0.078243	1046
BMgn001645	0.032223	0.058594	1047
BMgn006827	0.032287	0.058713	1048
BMgn001389	0.032333	0.078643	1049
BMgn015962	0.032334	0.058796	1050
BMgn000712	0.032456	0.0324	1051
BMgn013810	0.032458	0.078916	1052
BMgn009774	0.032486	0.078973	1053
BMgn013586	0.032506	0.079013	1054
BMgn016031	0.032512	0.080599	1055
BMgn006727	0.032544	0.032491	1056
BMgn009319	0.032573	0.059223	1057
BMgn007627	0.032574	0.059224	1058
BMgn016968	0.032622	0.059315	1059
BMgn003141	0.032646	0.059346	1060
BMgn000045	0.032704	0.059458	1061
BMgn013666	0.032727	0.08109	1062
BMgn015418	0.03274	0.063892	1063
BMgn016972	0.032791	0.059615	1064
BMgn001625	0.032814	0.059655	1065
BMgn003461	0.032851	0.079766	1066
BMgn013783	0.032886	0.064114	1067
BMgn010932	0.032907	0.064138	1068
BMgn000858	0.033024	0.080171	1069
BMgn014740	0.033055	0.060061	1070
BMgn010002	0.033096	0.060125	1071
BMgn013272	0.033164	0.033117	1072
BMgn015047	0.033204	0.064629	1073
BMgn001503	0.03321	0.064637	1074
BMgn001664	0.033227	0.060354	1075
BMgn015437	0.03323	0.064673	1076
BMgn017101	0.03327	0.080705	1077
BMgn014221	0.033275	0.033224	1078
BMgn008221	0.033275	0.064738	1079
BMgn007084	0.033283	0.080742	1080
BMgn014918	0.033319	0.033266	1081
BMgn004388	0.033376	0.080953	1082
BMgn006080	0.033447	0.081125	1083
BMgn013628	0.033459	0.060769	1084
BMgn012019	0.033482	0.081199	1085
BMgn016475	0.033535	0.065149	1086
BMgn010191	0.033567	0.065203	1087
BMgn013332	0.033585	0.033541	1088
BMgn009687	0.033607	0.081466	1089
BMgn005737	0.033662	0.061117	1090
BMgn015224	0.033665	0.065364	1091
BMgn001266	0.033697	0.065416	1092
BMgn004716	0.033699	0.083113	1093
BMgn002784	0.03371	0.065444	1094
BMgn011816	0.033715	0.081694	1095
BMgn006775	0.033736	0.065487	1096
BMgn014981	0.033795	0.065584	1097
BMgn000621	0.033824	0.083358	1098
BMgn000332	0.033849	0.061425	1099
BMgn016628	0.03386	0.065694	1100
BMgn017165	0.0339	0.082114	1101
BMgn016260	0.033906	0.065764	1102
BMgn011047	0.033924	0.061563	1103
BMgn017284	0.033999	0.082332	1104
BMgn008050	0.03402	0.083761	1105
BMgn012970	0.034037	0.065973	1106
BMgn002241	0.034055	0.06599	1107
BMgn006047	0.034151	0.061982	1108
BMgn014023	0.034185	0.066203	1109
BMgn006882	0.034185	0.062034	1110
BMgn016523	0.034227	0.034156	1111
BMgn007658	0.034249	0.0663	1112
BMgn002945	0.034377	0.066515	1113
BMgn000648	0.034484	0.083188	1114
BMgn006303	0.034513	0.084757	1115
BMgn015129	0.034529	0.062606	1116
BMgn014842	0.034538	0.083257	1117
BMgn015025	0.034574	0.066834	1118
BMgn002553	0.034582	0.034523	1119
BMgn016583	0.034589	0.084911	1120
BMgn006792	0.034639	0.066926	1121
BMgn005573	0.034667	0.085063	1122
BMgn014474	0.034718	0.062912	1123
BMgn016472	0.03472	0.067036	1124
BMgn015157	0.034786	0.067146	1125
BMgn014567	0.034834	0.067234	1126
BMgn006626	0.034837	0.083663	1127
BMgn011724	0.034905	0.067355	1128
BMgn002696	0.034914	0.034878	1129
BMgn016331	0.034925	0.063274	1130
BMgn000802	0.034963	0.067445	1131
BMgn007295	0.035023	0.092358	1132
BMgn016053	0.035097	0.085931	1133
BMgn015596	0.035104	0.067673	1134
BMgn010630	0.035143	0.06774	1135
BMgn014092	0.035223	0.067877	1136
BMgn006650	0.035229	0.06382	1137
BMgn008840	0.035263	0.067941	1138
BMgn006903	0.035268	0.084282	1139
BMgn015549	0.035288	0.067978	1140
BMgn008466	0.035335	0.035297	1141
BMgn004607	0.035356	0.068081	1142
BMgn006943	0.035357	0.035314	1143
BMgn007079	0.035403	0.064111	1144
BMgn004760	0.035447	0.064183	1145
BMgn012502	0.035499	0.084612	1146
BMgn000033	0.035516	0.06833	1147
BMgn014795	0.035527	0.084661	1148
BMgn009797	0.035527	0.08681	1149
BMgn017302	0.035547	0.06837	1150
BMgn003413	0.035613	0.084767	1151
BMgn005694	0.035641	0.064531	1152
BMgn012872	0.035666	0.064572	1153
BMgn015497	0.035796	0.068757	1154
BMgn013790	0.035838	0.064869	1155
BMgn003276	0.03585	0.064886	1156
BMgn005597	0.03592	0.085208	1157
BMgn009403	0.035958	0.085257	1158
BMgn005803	0.035993	0.0853	1159
BMgn002966	0.036001	0.069083	1160
BMgn005207	0.03601	0.065183	1161
BMgn013976	0.036024	0.069118	1162
BMgn000401	0.036131	0.069287	1163
BMgn012928	0.036176	0.036103	1164
BMgn002372	0.03623	0.065545	1165
BMgn014672	0.03632	0.069588	1166
BMgn000329	0.03633	0.065738	1167
BMgn017268	0.03639	0.069701	1168
BMgn011478	0.036508	0.086032	1169
BMgn014016	0.036522	0.069904	1170
BMgn015154	0.036556	0.066136	1171
BMgn011757	0.036564	0.086105	1172
BMgn011999	0.036566	0.066157	1173
BMgn010251	0.036647	0.086231	1174
BMgn011077	0.036685	0.07016	1175
BMgn000571	0.036685	0.066352	1176
BMgn016530	0.036868	0.089563	1177
BMgn008913	0.036885	0.036796	1178
BMgn002234	0.036908	0.070499	1179
BMgn009510	0.036925	0.089682	1180
BMgn009428	0.036931	0.066794	1181
BMgn008379	0.036969	0.070588	1182
BMgn016831	0.037009	0.089845	1183
BMgn006025	0.037042	0.066984	1184
BMgn005544	0.037099	0.067068	1185
BMgn011565	0.037168	0.070883	1186
BMgn005188	0.037273	0.06737	1187
BMgn015178	0.037326	0.09048	1188
BMgn003766	0.037336	0.087188	1189
BMgn013647	0.037337	0.07112	1190
BMgn006933	0.037416	0.037344	1191
BMgn009566	0.037492	0.071374	1192
BMgn008709	0.037508	0.087408	1193
BMgn016830	0.037549	0.037481	1194
BMgn003139	0.037556	0.071473	1195
BMgn015956	0.037564	0.09096	1196
BMgn003298	0.037577	0.067907	1197
BMgn009831	0.037583	0.071508	1198
BMgn010776	0.037605	0.087542	1199
BMgn005785	0.037686	0.071682	1200
BMgn005950	0.037693	0.068105	1201
BMgn013429	0.037723	0.091296	1202
BMgn003816	0.037751	0.068187	1203
BMgn012472	0.037751	0.097447	1204
BMgn004941	0.037784	0.091424	1205
BMgn008846	0.037793	0.03774	1206
BMgn008421	0.037794	0.068265	1207
BMgn004866	0.037813	0.068291	1208
BMgn011355	0.037856	0.091577	1209
BMgn012195	0.037874	0.068395	1210
BMgn016864	0.037949	0.09176	1211
BMgn009473	0.038025	0.088138	1212
BMgn007472	0.038077	0.072327	1213
BMgn014511	0.038115	0.06884	1214
BMgn016238	0.038204	0.072527	1215
BMgn007250	0.038214	0.072539	1216
BMgn003189	0.038269	0.072629	1217
BMgn011799	0.038359	0.069277	1218
BMgn011418	0.038384	0.092671	1219
BMgn003529	0.038477	0.072941	1220
BMgn008184	0.038497	0.06952	1221
BMgn013729	0.038527	0.073025	1222
BMgn012699	0.03854	0.06961	1223
BMgn014032	0.038615	0.073157	1224
BMgn002722	0.03862	0.069751	1225
BMgn002645	0.038627	0.088973	1226
BMgn002851	0.038643	0.093205	1227
BMgn012023	0.038657	0.073226	1228
BMgn011891	0.03875	0.069981	1229
BMgn015017	0.038786	0.073432	1230
BMgn002741	0.03881	0.070078	1231
BMgn014043	0.038828	0.070106	1232
BMgn002872	0.038839	0.09363	1233
BMgn002778	0.038878	0.038797	1234
BMgn002305	0.038906	0.070257	1235
BMgn005419	0.038976	0.073736	1236
BMgn000708	0.039045	0.073843	1237
BMgn006790	0.039056	0.089578	1238
BMgn017040	0.039059	0.073873	1239
BMgn001672	0.039081	0.070584	1240
BMgn002948	0.039175	0.074063	1241
BMgn006737	0.039229	0.089798	1242
BMgn007048	0.039239	0.074161	1243
BMgn012841	0.039268	0.074205	1244
BMgn003122	0.039271	0.070919	1245
BMgn013088	0.039301	0.070962	1246
BMgn006048	0.039321	0.039245	1247
BMgn009666	0.039338	0.074309	1248
BMgn009483	0.039365	0.039283	1249
BMgn001128	0.039437	0.090092	1250
BMgn014250	0.03945	0.071197	1251
BMgn001713	0.03945	0.074495	1252
BMgn001615	0.039488	0.071262	1253
BMgn010409	0.03952	0.074605	1254
BMgn013891	0.039587	0.039495	1255
BMgn009527	0.039617	0.0715	1256
BMgn002557	0.039618	0.074764	1257
BMgn014105	0.039627	0.074777	1258
BMgn008364	0.039705	0.071661	1259
BMgn010641	0.03973	0.07494	1260
BMgn007344	0.039744	0.090541	1261
BMgn000863	0.039776	0.071786	1262
BMgn013364	0.039782	0.090596	1263
BMgn008553	0.039785	0.071799	1264
BMgn009824	0.039785	0.10121	1265
BMgn017246	0.039786	0.075025	1266
BMgn006147	0.039829	0.071887	1267
BMgn004971	0.039925	0.095869	1268
BMgn013859	0.039965	0.072119	1269
BMgn015160	0.039966	0.095941	1270
BMgn004726	0.03998	0.095974	1271
BMgn008894	0.040015	0.075374	1272
BMgn004086	0.040052	0.039946	1273
BMgn012810	0.040096	0.075529	1274
BMgn015590	0.04014	0.040041	1275
BMgn014304	0.040144	0.096332	1276
BMgn015294	0.040145	0.096333	1277
BMgn016405	0.040205	0.10197	1278
BMgn002242	0.040246	0.072603	1279
BMgn006644	0.04026	0.091301	1280
BMgn016925	0.040269	0.072644	1281
BMgn009880	0.040274	0.075788	1282
BMgn008039	0.040339	0.091402	1283
BMgn000592	0.040436	0.091538	1284
BMgn008397	0.040486	0.073013	1285
BMgn004013	0.04053	0.073082	1286
BMgn010986	0.040573	0.097234	1287
BMgn016079	0.040597	0.076309	1288
BMgn006105	0.040726	0.076516	1289
BMgn016914	0.040732	0.076529	1290
BMgn007214	0.04079	0.073544	1291
BMgn005561	0.04086	0.076737	1292
BMgn014950	0.04092	0.076825	1293
BMgn012181	0.040963	0.073851	1294
BMgn003234	0.041033	0.092345	1295
BMgn014185	0.041049	0.077028	1296
BMgn011326	0.0411	0.098313	1297
BMgn004344	0.041118	0.092461	1298
BMgn002605	0.041137	0.074142	1299
BMgn001173	0.04123	0.092603	1300
BMgn013209	0.041243	0.077339	1301
BMgn010369	0.041366	0.092795	1302
BMgn016378	0.041462	0.092921	1303
BMgn007319	0.041548	0.093039	1304
BMgn015787	0.041646	0.041576	1305
BMgn006035	0.041649	0.099489	1306
BMgn014834	0.041657	0.075014	1307
BMgn002163	0.041701	0.075084	1308
BMgn000352	0.041719	0.093263	1309
BMgn009323	0.041744	0.075151	1310
BMgn006176	0.041757	0.093326	1311
BMgn006519	0.041761	0.099705	1312
BMgn000075	0.041801	0.041729	1313
BMgn013890	0.041874	0.075368	1314
BMgn014739	0.041889	0.078373	1315
BMgn014088	0.041915	0.10004	1316
BMgn013298	0.041917	0.075449	1317
BMgn016335	0.041945	0.1001	1318
BMgn005218	0.041954	0.078466	1319
BMgn006421	0.042004	0.075596	1320
BMgn009448	0.042023	0.041943	1321
BMgn001530	0.042047	0.075671	1322
BMgn002562	0.042124	0.075812	1323
BMgn001984	0.042178	0.075907	1324
BMgn006117	0.042233	0.075997	1325
BMgn015422	0.042237	0.10069	1326
BMgn001335	0.042264	0.076046	1327
BMgn011535	0.042287	0.1008	1328
BMgn012187	0.042388	0.076258	1329
BMgn015409	0.042466	0.042399	1330
BMgn016763	0.042577	0.094462	1331
BMgn002212	0.042598	0.076628	1332
BMgn005839	0.042599	0.042523	1333
BMgn013409	0.042622	0.094531	1334
BMgn011348	0.042654	0.10659	1335
BMgn014675	0.042698	0.076811	1336
BMgn014058	0.042711	0.079642	1337
BMgn003475	0.042728	0.079675	1338
BMgn012335	0.042864	0.077081	1339
BMgn009389	0.042929	0.080009	1340
BMgn012761	0.042946	0.077218	1341
BMgn010685	0.042986	0.080093	1342
BMgn016465	0.043051	0.08019	1343
BMgn004854	0.043112	0.077503	1344
BMgn006961	0.043156	0.095261	1345
BMgn016235	0.043177	0.095282	1346
BMgn013995	0.04318	0.080393	1347
BMgn014696	0.043196	0.095307	1348
BMgn008396	0.043228	0.10273	1349
BMgn012740	0.043249	0.080498	1350
BMgn006492	0.043255	0.09538	1351
BMgn010687	0.043264	0.080516	1352
BMgn004285	0.043304	0.077825	1353
BMgn006154	0.043315	0.095465	1354
BMgn007162	0.043348	0.095519	1355
BMgn016224	0.043373	0.080717	1356
BMgn016297	0.043388	0.077977	1357
BMgn016778	0.043434	0.095642	1358
BMgn003076	0.043434	0.07806	1359
BMgn005981	0.043474	0.095696	1360
BMgn017079	0.043512	0.080933	1361
BMgn017339	0.043514	0.10331	1362
BMgn001256	0.04357	0.081031	1363
BMgn006622	0.043607	0.078376	1364
BMgn008360	0.043643	0.081151	1365
BMgn001996	0.043665	0.078461	1366
BMgn013016	0.043777	0.078653	1367
BMgn007948	0.043781	0.078659	1368
BMgn013344	0.043862	0.096239	1369
BMgn010777	0.043918	0.10412	1370
BMgn003100	0.043948	0.096351	1371
BMgn006283	0.043951	0.10418	1372
BMgn008859	0.043951	0.081623	1373
BMgn003648	0.043971	0.07898	1374
BMgn002082	0.044009	0.079056	1375
BMgn013613	0.044046	0.079115	1376
BMgn001147	0.04412	0.079251	1377
BMgn010439	0.044288	0.07953	1378
BMgn015965	0.044304	0.044261	1379
BMgn004132	0.044304	0.082169	1380
BMgn015919	0.044363	0.08226	1381
BMgn010432	0.044456	0.079836	1382
BMgn002550	0.044459	0.04443	1383
BMgn014315	0.044494	0.097092	1384
BMgn002908	0.044534	0.082533	1385
BMgn008387	0.044548	0.044517	1386
BMgn008080	0.044703	0.082817	1387
BMgn002903	0.044719	0.09741	1388
BMgn006863	0.044727	0.082848	1389
BMgn005264	0.044732	0.082857	1390
BMgn005487	0.044777	0.080387	1391
BMgn001022	0.044955	0.083218	1392
BMgn010514	0.044957	0.10623	1393
BMgn013951	0.044971	0.080689	1394
BMgn012112	0.044985	0.083272	1395
BMgn000058	0.04499	0.080717	1396
BMgn013773	0.045018	0.097813	1397
BMgn014235	0.045046	0.080816	1398
BMgn013184	0.045103	0.083452	1399
BMgn013719	0.045118	0.083466	1400
BMgn014997	0.045133	0.083488	1401
BMgn001812	0.045168	0.045166	1402
BMgn015961	0.045234	0.045241	1403
BMgn008440	0.045262	0.081186	1404
BMgn017229	0.045272	0.081201	1405
BMgn000859	0.045277	0.10689	1406
BMgn006822	0.045307	0.083748	1407
BMgn015323	0.045339	0.081297	1408
BMgn005754	0.045343	0.10704	1409
BMgn007520	0.045372	0.083855	1410
BMgn014454	0.045394	0.10715	1411
BMgn001006	0.045469	0.081497	1412
BMgn015999	0.045512	0.081562	1413
BMgn009952	0.045565	0.098543	1414
BMgn010624	0.045629	0.084237	1415
BMgn016039	0.045653	0.11224	1416
BMgn009759	0.045669	0.1077	1417
BMgn002591	0.045694	0.084338	1418
BMgn008521	0.045744	0.084426	1419
BMgn011022	0.045758	0.084453	1420
BMgn012492	0.045801	0.082081	1421
BMgn017094	0.045923	0.0847	1422
BMgn003872	0.045943	0.045918	1423
BMgn014713	0.04601	0.082422	1424
BMgn014859	0.046016	0.084848	1425
BMgn001575	0.046032	0.082459	1426
BMgn013373	0.046118	0.082609	1427
BMgn002288	0.046217	0.099429	1428
BMgn017198	0.046238	0.082804	1429
BMgn002415	0.046273	0.085253	1430
BMgn008873	0.046291	0.082881	1431
BMgn013340	0.046334	0.082955	1432
BMgn002819	0.046424	0.10919	1433
BMgn011442	0.046464	0.085564	1434
BMgn000850	0.046496	0.083212	1435
BMgn003417	0.046519	0.0465	1436
BMgn016115	0.046539	0.085689	1437
BMgn008478	0.046688	0.10007	1438
BMgn015406	0.046853	0.083837	1439
BMgn007464	0.046857	0.10031	1440
BMgn017169	0.046955	0.084013	1441
BMgn017056	0.046983	0.084064	1442
BMgn014748	0.047028	0.10054	1443
BMgn006325	0.047031	0.11039	1444
BMgn006547	0.04705	0.047033	1445
BMgn011768	0.047061	0.084176	1446
BMgn016022	0.047098	0.086553	1447
BMgn005278	0.04712	0.10065	1448
BMgn012059	0.047128	0.086594	1449
BMgn009658	0.047264	0.086812	1450
BMgn003926	0.047303	0.086866	1451
BMgn002630	0.047325	0.086901	1452
BMgn002601	0.047409	0.10102	1453
BMgn001507	0.047416	0.08704	1454
BMgn010054	0.047431	0.087065	1455
BMgn003370	0.047502	0.084563	1456
BMgn014477	0.04756	0.087256	1457
BMgn001034	0.047588	0.08463	1458
BMgn005747	0.047659	0.087402	1459
BMgn008064	0.047675	0.087429	1460
BMgn015089	0.047689	0.087447	1461
BMgn013646	0.047753	0.087549	1462
BMgn003435	0.047891	0.084842	1463
BMgn004560	0.047967	0.10177	1464
BMgn014470	0.047968	0.10177	1465
BMgn001821	0.048074	0.088087	1466
BMgn013315	0.048113	0.10195	1467
BMgn001931	0.048154	0.11266	1468
BMgn007501	0.048268	0.048257	1469
BMgn000509	0.048309	0.1022	1470
BMgn009026	0.048396	0.088602	1471
BMgn011267	0.048485	0.088743	1472
BMgn016283	0.048565	0.10253	1473
BMgn008135	0.048735	0.10277	1474
BMgn009866	0.048925	0.11418	1475
BMgn006302	0.048977	0.089494	1476
BMgn015527	0.049041	0.1144	1477
BMgn003616	0.049077	0.10324	1478
BMgn001975	0.049112	0.11455	1479
BMgn010213	0.049167	0.089789	1480
BMgn016271	0.049198	0.049261	1481
BMgn006367	0.049231	0.089896	1482
BMgn000732	0.049285	0.089975	1483
BMgn006178	0.049403	0.086051	1484
BMgn013910	0.049489	0.08613	1485
BMgn017438	0.049576	0.086211	1486
BMgn009674	0.049595	0.090448	1487
BMgn002312	0.049619	0.10402	1488
BMgn000209	0.049745	0.090675	1489
BMgn012991	0.04975	0.11585	1490
BMgn017121	0.049851	0.10433	1491
BMgn011366	0.049857	0.11606	1492
BMgn012031	0.049921	0.09093	1493
BMgn006979	0.049921	0.086489	1494
BMgn007666	0.050002	0.091054	1495
BMgn017019	0.050029	0.091095	1496
BMgn007261	0.0501	0.10467	1497
BMgn011526	0.05013	0.091246	1498
BMgn017506	0.050221	0.12064	1499
BMgn015341	0.050283	0.050342	1500
BMgn000575	0.050325	0.091545	1501
BMgn002232	0.050387	0.091641	1502
BMgn013388	0.050396	0.086866	1503
BMgn009111	0.050515	0.091832	1504
BMgn014130	0.050528	0.091847	1505
BMgn000664	0.050559	0.091902	1506
BMgn006668	0.050653	0.12144	1507
BMgn007086	0.050705	0.11775	1508
BMgn005232	0.050708	0.092129	1509
BMgn011295	0.05081	0.092312	1510
BMgn010551	0.050857	0.092389	1511
BMgn010929	0.050867	0.10574	1512
BMgn016630	0.051084	0.11853	1513
BMgn014209	0.051216	0.087511	1514
BMgn006942	0.051258	0.1189	1515
BMgn011010	0.05128	0.051323	1516
BMgn008519	0.051296	0.093092	1517
BMgn009244	0.051302	0.087589	1518
BMgn000783	0.051475	0.087716	1519
BMgn005674	0.051478	0.093395	1520
BMgn016013	0.051524	0.051576	1521
BMgn012921	0.051527	0.11943	1522
BMgn004438	0.051633	0.10676	1523
BMgn002225	0.051647	0.087847	1524
BMgn003844	0.051701	0.051757	1525
BMgn005811	0.051734	0.093766	1526
BMgn015716	0.051927	0.094064	1527
BMgn007357	0.051927	0.094064	1528
BMgn006442	0.05199	0.094188	1529
BMgn001411	0.051992	0.088132	1530
BMgn012423	0.052068	0.12053	1531
BMgn012247	0.052179	0.12421	1532
BMgn003054	0.05218	0.094468	1533
BMgn015299	0.052229	0.1076	1534
BMgn009339	0.052231	0.12084	1535
BMgn009862	0.052323	0.094703	1536
BMgn004023	0.052432	0.052461	1537
BMgn006649	0.05244	0.094882	1538
BMgn005915	0.052466	0.094924	1539
BMgn016272	0.052518	0.10801	1540
BMgn017262	0.052587	0.052628	1541
BMgn012226	0.052654	0.1082	1542
BMgn012477	0.052764	0.052805	1543
BMgn017120	0.052875	0.052916	1544
BMgn011395	0.052971	0.10862	1545
BMgn001505	0.052976	0.095722	1546
BMgn008978	0.05307	0.089001	1547
BMgn010263	0.053103	0.095921	1548
BMgn000151	0.053145	0.095983	1549
BMgn014464	0.053156	0.089063	1550
BMgn016891	0.053195	0.12613	1551
BMgn009239	0.053251	0.05327	1552
BMgn002854	0.053295	0.096218	1553
BMgn000911	0.053311	0.096244	1554
BMgn014863	0.053337	0.096289	1555
BMgn002385	0.053359	0.12312	1556
BMgn013880	0.053401	0.096383	1557
BMgn000751	0.053458	0.089299	1558
BMgn010531	0.053503	0.096552	1559
BMgn009112	0.053593	0.096705	1560
BMgn009764	0.0536	0.10952	1561
BMgn007452	0.053674	0.089496	1562
BMgn003952	0.053675	0.10965	1563
BMgn006546	0.053687	0.10967	1564
BMgn009277	0.053712	0.096877	1565
BMgn006505	0.053717	0.089534	1566
BMgn010756	0.05376	0.089582	1567
BMgn010402	0.053845	0.10989	1568
BMgn000064	0.053932	0.089716	1569
BMgn010253	0.053971	0.11006	1570
BMgn007763	0.053977	0.097281	1571
BMgn012104	0.054015	0.11012	1572
BMgn008741	0.054181	0.054158	1573
BMgn016142	0.054191	0.089942	1574
BMgn015397	0.05421	0.097625	1575
BMgn005856	0.054277	0.090002	1576
BMgn014630	0.054291	0.125	1577
BMgn007908	0.054292	0.054258	1578
BMgn013594	0.05432	0.090043	1579
BMgn007933	0.054355	0.097876	1580
BMgn002446	0.054358	0.05432	1581
BMgn008590	0.054489	0.098069	1582
BMgn000099	0.054517	0.09811	1583
BMgn005964	0.054636	0.1257	1584
BMgn016076	0.054664	0.090333	1585
BMgn003759	0.054776	0.098559	1586
BMgn010738	0.054809	0.098622	1587
BMgn003524	0.05484	0.098664	1588
BMgn013742	0.054954	0.098836	1589
BMgn010574	0.055009	0.090626	1590
BMgn000760	0.055034	0.11153	1591
BMgn000650	0.055051	0.098989	1592
BMgn014753	0.055116	0.099081	1593
BMgn013725	0.055147	0.12675	1594
BMgn010174	0.055193	0.09921	1595
BMgn008182	0.055204	0.11176	1596
BMgn015060	0.055308	0.12705	1597
BMgn003982	0.05531	0.090865	1598
BMgn004347	0.055439	0.090961	1599
BMgn010910	0.055444	0.055361	1600
BMgn008848	0.055462	0.11209	1601
BMgn013637	0.055466	0.055382	1602
BMgn011708	0.055577	0.099812	1603
BMgn013516	0.05562	0.099887	1604
BMgn017548	0.055718	0.10003	1605
BMgn014086	0.055898	0.10029	1606
BMgn003985	0.055968	0.11277	1607
BMgn007455	0.055994	0.12842	1608
BMgn005513	0.055996	0.10043	1609
BMgn003070	0.056024	0.10048	1610
BMgn011644	0.056064	0.055991	1611
BMgn008576	0.056128	0.1287	1612
BMgn009702	0.056176	0.1007	1613
BMgn005191	0.056285	0.056198	1614
BMgn014459	0.05629	0.10087	1615
BMgn011790	0.056343	0.091668	1616
BMgn002954	0.056344	0.10096	1617
BMgn012753	0.056345	0.12911	1618
BMgn003488	0.056472	0.091768	1619
BMgn006808	0.056477	0.11348	1620
BMgn008867	0.056513	0.12943	1621
BMgn011868	0.056515	0.091805	1622
BMgn014027	0.056525	0.11355	1623
BMgn012831	0.056558	0.091841	1624
BMgn007800	0.056601	0.091874	1625
BMgn017565	0.056644	0.09192	1626
BMgn015727	0.056717	0.10155	1627
BMgn005325	0.056728	0.10156	1628
BMgn015725	0.056792	0.11392	1629
BMgn013293	0.056832	0.13003	1630
BMgn012106	0.056849	0.13006	1631
BMgn011596	0.056855	0.10176	1632
BMgn009942	0.056883	0.056807	1633
BMgn006479	0.056898	0.10183	1634
BMgn012788	0.056919	0.10185	1635
BMgn015678	0.057111	0.10214	1636
BMgn010703	0.057172	0.11444	1637
BMgn003374	0.057175	0.10224	1638
BMgn010886	0.057239	0.10234	1639
BMgn015477	0.05724	0.11453	1640
BMgn011914	0.057274	0.1309	1641
BMgn008405	0.057328	0.11465	1642
BMgn004287	0.057377	0.10255	1643
BMgn011402	0.057392	0.057325	1644
BMgn007550	0.05743	0.10262	1645
BMgn015314	0.057494	0.10273	1646
BMgn008560	0.05753	0.11493	1647
BMgn009047	0.057643	0.13159	1648
BMgn010370	0.057663	0.11515	1649
BMgn014283	0.057694	0.13168	1650
BMgn008872	0.05775	0.10311	1651
BMgn014654	0.057807	0.10321	1652
BMgn008058	0.057915	0.13209	1653
BMgn017172	0.057968	0.057934	1654
BMgn007486	0.057972	0.13221	1655
BMgn001562	0.058005	0.10352	1656
BMgn001100	0.058029	0.13232	1657
BMgn010287	0.058039	0.10356	1658
BMgn012229	0.058068	0.1157	1659
BMgn000314	0.058203	0.11588	1660
BMgn003909	0.058235	0.093195	1661
BMgn005166	0.058248	0.11595	1662
BMgn013194	0.058293	0.11602	1663
BMgn014967	0.058406	0.11617	1664
BMgn001598	0.058426	0.13311	1665
BMgn000488	0.05851	0.11631	1666
BMgn000697	0.058579	0.093455	1667
BMgn013943	0.058595	0.11644	1668
BMgn012972	0.058707	0.10455	1669
BMgn009677	0.058708	0.093565	1670
BMgn004434	0.058769	0.13381	1671
BMgn008563	0.058837	0.093659	1672
BMgn003416	0.058923	0.093738	1673
BMgn010463	0.059026	0.10501	1674
BMgn003654	0.059056	0.10507	1675
BMgn012933	0.059061	0.11708	1676
BMgn011075	0.05909	0.10512	1677
BMgn010481	0.059181	0.093956	1678
BMgn014523	0.059198	0.1347	1679
BMgn001056	0.059281	0.10543	1680
BMgn010936	0.059319	0.059269	1681
BMgn008818	0.059441	0.11762	1682
BMgn011131	0.059525	0.13783	1683
BMgn002964	0.059559	0.1059	1684
BMgn014431	0.059582	0.1178	1685
BMgn015926	0.059628	0.11786	1686
BMgn007390	0.059782	0.094415	1687
BMgn012260	0.059825	0.094441	1688
BMgn013656	0.059864	0.11817	1689
BMgn002891	0.059917	0.059897	1690
BMgn001806	0.059983	0.10656	1691
BMgn006909	0.060054	0.13637	1692
BMgn016725	0.060169	0.094708	1693
BMgn000208	0.060182	0.10688	1694
BMgn015625	0.060227	0.13672	1695
BMgn008717	0.060266	0.107	1696
BMgn003599	0.060287	0.11875	1697
BMgn002742	0.060294	0.060277	1698
BMgn008751	0.060383	0.094892	1699
BMgn015112	0.060515	0.060502	1700
BMgn011836	0.06052	0.10739	1701
BMgn002782	0.060537	0.10742	1702
BMgn017159	0.060621	0.10755	1703
BMgn003163	0.060748	0.10774	1704
BMgn016374	0.060777	0.13778	1705
BMgn017140	0.060794	0.11941	1706
BMgn005281	0.060813	0.095238	1707
BMgn005091	0.060856	0.095269	1708
BMgn006761	0.06096	0.10805	1709
BMgn008051	0.061003	0.10811	1710
BMgn004130	0.061027	0.095397	1711
BMgn003314	0.061069	0.061048	1712
BMgn010363	0.061132	0.1199	1713
BMgn003546	0.061178	0.13856	1714
BMgn017478	0.061297	0.12011	1715
BMgn015537	0.061335	0.061312	1716
BMgn010375	0.061351	0.10866	1717
BMgn000402	0.061445	0.061411	1718
BMgn017510	0.061467	0.061433	1719
BMgn011020	0.061504	0.12041	1720
BMgn002598	0.06164	0.10913	1721
BMgn007038	0.061757	0.12076	1722
BMgn011895	0.061828	0.10941	1723
BMgn017209	0.061831	0.13983	1724
BMgn010806	0.062022	0.1097	1725
BMgn007946	0.06205	0.10975	1726
BMgn005376	0.062085	0.1098	1727
BMgn007173	0.06211	0.06206	1728
BMgn013289	0.062146	0.1213	1729
BMgn004597	0.062154	0.062103	1730
BMgn002347	0.062221	0.11001	1731
BMgn012253	0.062276	0.1101	1732
BMgn014494	0.06229	0.11011	1733
BMgn008239	0.062341	0.11019	1734
BMgn014725	0.0624	0.096527	1735
BMgn004585	0.062467	0.1104	1736
BMgn014463	0.062483	0.12178	1737
BMgn005043	0.06253	0.1105	1738
BMgn000242	0.062553	0.062502	1739
BMgn016463	0.062681	0.14152	1740
BMgn016108	0.062775	0.12219	1741
BMgn014839	0.062785	0.11088	1742
BMgn005711	0.062806	0.14176	1743
BMgn014784	0.062822	0.12226	1744
BMgn007317	0.062839	0.11097	1745
BMgn014467	0.062913	0.11108	1746
BMgn008253	0.063055	0.14424	1747
BMgn015561	0.063103	0.11138	1748
BMgn011782	0.063215	0.097211	1749
BMgn008166	0.063294	0.11164	1750
BMgn016207	0.063301	0.097275	1751
BMgn011132	0.063321	0.11168	1752
BMgn011537	0.063377	0.14291	1753
BMgn001632	0.063427	0.1231	1754
BMgn002874	0.063442	0.11186	1755
BMgn017287	0.063649	0.11218	1756
BMgn010378	0.063684	0.11222	1757
BMgn013593	0.063685	0.14351	1758
BMgn011792	0.063686	0.097593	1759
BMgn004524	0.063699	0.14354	1760
BMgn004564	0.063823	0.12366	1761
BMgn001945	0.063867	0.11248	1762
BMgn005331	0.064127	0.12409	1763
BMgn006056	0.064185	0.14446	1764
BMgn011248	0.064201	0.098005	1765
BMgn005370	0.064308	0.11316	1766
BMgn005401	0.064312	0.11316	1767
BMgn000489	0.064423	0.1245	1768
BMgn004029	0.064435	0.064417	1769
BMgn005782	0.064479	0.12459	1770
BMgn002145	0.064629	0.11366	1771
BMgn012829	0.064749	0.14554	1772
BMgn006937	0.064854	0.14573	1773
BMgn006365	0.064902	0.12521	1774
BMgn001545	0.065022	0.11429	1775
BMgn007995	0.065053	0.14612	1776
BMgn013395	0.06509	0.12547	1777
BMgn010569	0.065099	0.065102	1778
BMgn002735	0.0651	0.098765	1779
BMgn002384	0.065138	0.11448	1780
BMgn016296	0.065214	0.11459	1781
BMgn007355	0.065271	0.14653	1782
BMgn004692	0.065343	0.065367	1783
BMgn015509	0.0654	0.099002	1784
BMgn016912	0.065406	0.11491	1785
BMgn009470	0.065486	0.099067	1786
BMgn014975	0.065518	0.12607	1787
BMgn003877	0.065571	0.09914	1788
BMgn005316	0.065582	0.11519	1789
BMgn005371	0.065587	0.065595	1790
BMgn012192	0.065602	0.12619	1791
BMgn001524	0.065614	0.099173	1792
BMgn005060	0.065646	0.11528	1793
BMgn007141	0.065657	0.099208	1794
BMgn005076	0.065686	0.12631	1795
BMgn014082	0.0657	0.099246	1796
BMgn014061	0.06582	0.14927	1797
BMgn008685	0.065855	0.14763	1798
BMgn009801	0.065855	0.12652	1799
BMgn008746	0.065862	0.1156	1800
BMgn014734	0.065905	0.14942	1801
BMgn011262	0.065917	0.12661	1802
BMgn005251	0.066074	0.066103	1803
BMgn000376	0.066125	0.116	1804
BMgn011220	0.066281	0.11625	1805
BMgn011634	0.06634	0.066381	1806
BMgn016842	0.06636	0.12723	1807
BMgn009756	0.066439	0.12734	1808
BMgn015564	0.066442	0.1165	1809
BMgn001481	0.066444	0.12735	1810
BMgn008811	0.066551	0.14897	1811
BMgn015174	0.066605	0.066644	1812
BMgn016783	0.066661	0.11683	1813
BMgn009754	0.066678	0.15082	1814
BMgn001723	0.06668	0.14924	1815
BMgn006591	0.066699	0.14927	1816
BMgn007441	0.066725	0.11693	1817
BMgn000164	0.066735	0.14934	1818
BMgn002115	0.066813	0.10015	1819
BMgn005788	0.066827	0.066862	1820
BMgn001270	0.066847	0.11711	1821
BMgn003933	0.066867	0.12795	1822
BMgn016525	0.066915	0.12801	1823
BMgn006132	0.066941	0.10026	1824
BMgn009700	0.066989	0.11735	1825
BMgn016926	0.067042	0.11744	1826
BMgn006960	0.067105	0.11754	1827
BMgn016084	0.067112	0.1004	1828
BMgn013056	0.067169	0.11765	1829
BMgn012320	0.067198	0.10046	1830
BMgn001248	0.067236	0.11775	1831
BMgn011244	0.067314	0.067325	1832
BMgn016211	0.067359	0.11794	1833
BMgn001758	0.067382	0.15061	1834
BMgn001639	0.067416	0.12871	1835
BMgn005922	0.067467	0.1181	1836
BMgn008723	0.067607	0.12897	1837
BMgn009243	0.067791	0.15139	1838
BMgn010897	0.067822	0.12926	1839
BMgn006661	0.067839	0.10098	1840
BMgn007504	0.067851	0.1515	1841
BMgn014385	0.067873	0.12933	1842
BMgn015442	0.067928	0.11878	1843
BMgn011430	0.067993	0.11888	1844
BMgn017498	0.06801	0.10111	1845
BMgn007445	0.068124	0.11907	1846
BMgn004439	0.068133	0.068113	1847
BMgn015048	0.068156	0.068131	1848
BMgn016321	0.068178	0.068159	1849
BMgn010581	0.068206	0.12978	1850
BMgn009630	0.068392	0.15398	1851
BMgn010863	0.068395	0.10143	1852
BMgn004994	0.068437	0.11953	1853
BMgn003963	0.068461	0.13011	1854
BMgn002246	0.068737	0.10174	1855
BMgn011575	0.068754	0.12004	1856
BMgn013931	0.068874	0.12021	1857
BMgn003265	0.068944	0.12031	1858
BMgn010698	0.069007	0.12041	1859
BMgn006404	0.069036	0.10199	1860
BMgn013117	0.069133	0.13106	1861
BMgn002349	0.069197	0.069186	1862
BMgn008700	0.069207	0.10213	1863
BMgn011851	0.069242	0.13119	1864
BMgn014992	0.06926	0.1208	1865
BMgn004888	0.069293	0.10219	1866
BMgn005340	0.069304	0.12087	1867
BMgn017446	0.069335	0.10223	1868
BMgn015690	0.069374	0.069373	1869
BMgn003661	0.06944	0.069445	1870
BMgn013908	0.069653	0.13178	1871
BMgn002317	0.069677	0.10251	1872
BMgn010095	0.069681	0.12147	1873
BMgn012782	0.069805	0.13199	1874
BMgn009060	0.069813	0.15528	1875
BMgn013300	0.06983	0.1217	1876
BMgn013762	0.069889	0.13211	1877
BMgn000251	0.069894	0.12178	1878
BMgn005265	0.070095	0.12209	1879
BMgn015983	0.07014	0.13246	1880
BMgn014906	0.070147	0.12216	1881
BMgn015070	0.070193	0.070148	1882
BMgn007787	0.070232	0.10296	1883
BMgn002909	0.070275	0.12236	1884
BMgn009190	0.070419	0.12258	1885
BMgn007725	0.070574	0.10324	1886
BMgn006510	0.070594	0.15791	1887
BMgn000738	0.070643	0.13316	1888
BMgn010982	0.07068	0.070623	1889
BMgn005810	0.070727	0.12306	1890
BMgn017063	0.070769	0.070721	1891
BMgn007393	0.070819	0.13337	1892
BMgn012237	0.07083	0.10345	1893
BMgn001122	0.070873	0.10348	1894
BMgn014486	0.070962	0.12343	1895
BMgn009867	0.071038	0.13367	1896
BMgn006938	0.071162	0.12372	1897
BMgn009771	0.071185	0.13386	1898
BMgn005511	0.071222	0.12382	1899
BMgn016203	0.071257	0.10379	1900
BMgn007321	0.07127	0.1239	1901
BMgn005575	0.071331	0.15925	1902
BMgn006474	0.071411	0.071366	1903
BMgn000772	0.071412	0.12413	1904
BMgn004919	0.071539	0.12433	1905
BMgn012954	0.071634	0.12447	1906
BMgn013972	0.071649	0.13451	1907
BMgn017251	0.071665	0.12452	1908
BMgn010417	0.071725	0.12462	1909
BMgn004666	0.071775	0.13469	1910
BMgn006996	0.071812	0.10424	1911
BMgn012541	0.071855	0.10427	1912
BMgn014512	0.071865	0.15921	1913
BMgn016061	0.071901	0.13485	1914
BMgn002748	0.071925	0.12494	1915
BMgn017330	0.071981	0.12502	1916
BMgn008883	0.071983	0.10438	1917
BMgn006753	0.072053	0.071997	1918
BMgn003791	0.072066	0.13508	1919
BMgn000973	0.072089	0.12519	1920
BMgn014492	0.072091	0.1351	1921
BMgn013676	0.072152	0.13519	1922
BMgn002627	0.072162	0.1253	1923
BMgn014366	0.072196	0.10454	1924
BMgn008954	0.072236	0.1353	1925
BMgn002646	0.072239	0.10457	1926
BMgn000702	0.072474	0.072433	1927
BMgn010097	0.072495	0.1048	1928
BMgn002579	0.072509	0.12584	1929
BMgn017193	0.072571	0.13577	1930
BMgn013948	0.07274	0.12619	1931
BMgn011679	0.072759	0.1618	1932
BMgn005528	0.072784	0.072751	1933
BMgn015270	0.072803	0.1603	1934
BMgn015287	0.072821	0.1263	1935
BMgn007830	0.072829	0.07279	1936
BMgn012289	0.072921	0.10513	1937
BMgn013763	0.073006	0.072966	1938
BMgn010324	0.073073	0.13647	1939
BMgn009572	0.073119	0.12674	1940
BMgn008190	0.073134	0.10531	1941
BMgn016089	0.07322	0.10539	1942
BMgn005567	0.073245	0.12692	1943
BMgn005652	0.073297	0.13679	1944
BMgn015599	0.07336	0.073294	1945
BMgn003846	0.073382	0.073315	1946
BMgn012686	0.073426	0.12719	1947
BMgn000406	0.073497	0.12729	1948
BMgn016340	0.073537	0.12735	1949
BMgn006684	0.073561	0.10566	1950
BMgn005309	0.073665	0.12756	1951
BMgn015825	0.073687	0.1276	1952
BMgn014416	0.073718	0.13737	1953
BMgn009254	0.07375	0.12771	1954
BMgn001629	0.073774	0.10583	1955
BMgn007659	0.073831	0.12784	1956
BMgn002536	0.073876	0.1279	1957
BMgn007554	0.073909	0.13765	1958
BMgn011490	0.073949	0.16162	1959
BMgn016983	0.074024	0.073974	1960
BMgn014352	0.074115	0.10609	1961
BMgn013278	0.074129	0.12829	1962
BMgn012121	0.074256	0.12847	1963
BMgn002017	0.074274	0.1285	1964
BMgn004777	0.07429	0.074249	1965
BMgn016184	0.074438	0.13832	1966
BMgn007898	0.074444	0.12877	1967
BMgn013691	0.074445	0.16222	1968
BMgn011984	0.074498	0.10641	1969
BMgn009303	0.074537	0.13845	1970
BMgn007425	0.074626	0.10651	1971
BMgn014752	0.074697	0.12917	1972
BMgn005599	0.07476	0.12926	1973
BMgn017192	0.074797	0.10666	1974
BMgn000258	0.074823	0.12935	1975
BMgn011864	0.074829	0.13884	1976
BMgn016772	0.074882	0.10673	1977
BMgn013378	0.074886	0.12943	1978
BMgn009841	0.075012	0.1296	1979
BMgn011427	0.075163	0.12983	1980
BMgn003244	0.075198	0.075126	1981
BMgn000186	0.075201	0.12989	1982
BMgn006361	0.075264	0.12998	1983
BMgn003633	0.075308	0.1071	1984
BMgn014644	0.075312	0.13005	1985
BMgn004518	0.07539	0.13018	1986
BMgn006036	0.075398	0.075341	1987
BMgn012864	0.07541	0.13964	1988
BMgn009436	0.075436	0.10722	1989
BMgn016873	0.075461	0.13029	1990
BMgn002628	0.075485	0.13974	1991
BMgn004584	0.075486	0.075438	1992
BMgn004756	0.075498	0.13036	1993
BMgn002886	0.075664	0.14002	1994
BMgn013772	0.075665	0.13064	1995
BMgn004942	0.075685	0.075629	1996
BMgn011000	0.07571	0.14009	1997
BMgn014844	0.075776	0.10752	1998
BMgn011061	0.075814	0.13087	1999
[truncated: 13,974 more rows]

## Sheet: sgRNA score
sgRNA ID	Gene ID	sgRNA_score
gRNA_13112	BMgn002834	77.643
gRNA_58494	BMgn011281	48.67
gRNA_48623	BMgn009501	44.39
gRNA_71699	BMgn013663	39.542
gRNA_81840	BMgn015482	38.924
gRNA_11496	BMgn002495	38.66
gRNA_64486	BMgn012357	36.478
gRNA_27449	BMgn005679	35.476
gRNA_68829	BMgn013152	33.096
gRNA_68441	BMgn013084	30.163
gRNA_56129	BMgn010850	29.651
gRNA_6752	BMgn001466	27.772
gRNA_17052	BMgn003678	27.637
gRNA_82987	BMgn015679	27.319
gRNA_40210	BMgn007980	27.245
gRNA_37358	BMgn007478	26.671
gRNA_79874	BMgn015147	26.578
gRNA_41909	BMgn008289	25.944
gRNA_12112	BMgn002625	25.091
gRNA_23589	BMgn004972	24.604
gRNA_30603	BMgn006252	23.641
gRNA_77409	BMgn014728	23.157
gRNA_41354	BMgn008185	23.146
gRNA_51121	BMgn009957	22.927
gRNA_37588	BMgn007516	22.909
gRNA_80747	BMgn015296	22.843
gRNA_64934	BMgn012439	22.699
gRNA_51819	BMgn010090	22.603
gRNA_84169	BMgn015881	22.545
gRNA_32679	BMgn006636	22.436
gRNA_65793	BMgn012600	22.367
gRNA_45126	BMgn008865	22.226
gRNA_25191	BMgn005271	22.088
gRNA_71460	BMgn013619	21.626
gRNA_3164	BMgn000687	21.516
gRNA_623	BMgn000139	21.474
gRNA_39606	BMgn007874	21.296
gRNA_36852	BMgn007388	20.483
gRNA_61490	BMgn011820	20.244
gRNA_41837	BMgn008277	19.901
gRNA_44278	BMgn008711	19.731
gRNA_21077	BMgn004521	19.649
gRNA_29383	BMgn006031	19.6
gRNA_62049	BMgn011919	19.497
gRNA_2085	BMgn000450	19.267
gRNA_93412	BMgn017484	19.193
gRNA_48378	BMgn009458	19.048
gRNA_1361	BMgn000297	18.974
gRNA_63509	BMgn012178	18.87
gRNA_4368	BMgn000948	18.7
gRNA_6507	BMgn001409	18.665
gRNA_25769	BMgn005374	18.629
gRNA_82804	BMgn015649	18.606
gRNA_16901	BMgn003646	18.521
gRNA_72511	BMgn013813	18.512
gRNA_39898	BMgn007925	18.363
gRNA_23298	BMgn004923	18.048
gRNA_90563	BMgn016993	18.019
gRNA_75689	BMgn014412	17.938
gRNA_82088	BMgn015525	17.838
gRNA_10160	BMgn002201	17.773
gRNA_40439	BMgn008020	17.739
gRNA_17021	BMgn003671	17.704
gRNA_3577	BMgn000775	17.701
gRNA_62955	BMgn012081	17.514
gRNA_66065	BMgn012646	17.505
gRNA_38142	BMgn007612	17.405
gRNA_90795	BMgn017032	17.392
gRNA_89722	BMgn016846	17.361
gRNA_21488	BMgn004602	17.328
gRNA_26895	BMgn005576	17.296
gRNA_17143	BMgn003698	17.271
gRNA_19741	BMgn004274	17.15
gRNA_20493	BMgn004414	17.081
gRNA_60272	BMgn011603	17.067
gRNA_93806	BMgn017556	17.063
gRNA_64990	BMgn012450	17.029
gRNA_59789	BMgn011515	16.993
gRNA_11446	BMgn002483	16.982
gRNA_36803	BMgn007378	16.816
gRNA_44910	BMgn008828	16.804
gRNA_28699	BMgn005911	16.754
gRNA_47073	BMgn009216	16.73
gRNA_34107	BMgn006891	16.667
gRNA_81637	BMgn015447	16.614
gRNA_17496	BMgn003771	16.606
gRNA_52936	BMgn010288	16.603
gRNA_75406	BMgn014360	16.477
gRNA_27990	BMgn005778	16.41
gRNA_85620	BMgn016134	16.371
gRNA_52166	BMgn010151	16.239
gRNA_12922	BMgn002794	16.164
gRNA_88759	BMgn016678	16.147
gRNA_5612	BMgn001219	16.103
gRNA_79031	BMgn015004	16.047
gRNA_52438	BMgn010196	16.021
gRNA_90549	BMgn016990	15.901
gRNA_58118	BMgn011216	15.826
gRNA_4437	BMgn000963	15.782
gRNA_72986	BMgn013897	15.624
gRNA_32536	BMgn006611	15.593
gRNA_47762	BMgn009346	15.586
gRNA_32258	BMgn006559	15.58
gRNA_74878	BMgn014251	15.496
gRNA_51233	BMgn009980	15.48
gRNA_76635	BMgn014591	15.463
gRNA_45755	BMgn008973	15.354
gRNA_59229	BMgn011416	15.262
gRNA_74256	BMgn014129	15.236
gRNA_80146	BMgn015194	15.224
gRNA_34471	BMgn006957	15.11
gRNA_42129	BMgn008331	15.104
gRNA_27807	BMgn005745	15.099
gRNA_72725	BMgn013852	15.081
gRNA_8995	BMgn001944	15.045
gRNA_93209	BMgn017449	15.027
gRNA_60013	BMgn011556	15.007
gRNA_61421	BMgn011808	14.982
gRNA_26940	BMgn005584	14.976
gRNA_2883	BMgn000625	14.949
gRNA_12834	BMgn002776	14.851
gRNA_6519	BMgn001412	14.851
gRNA_35261	BMgn007096	14.768
gRNA_8980	BMgn001941	14.762
gRNA_14452	BMgn003124	14.735
gRNA_84807	BMgn015993	14.706
gRNA_29373	BMgn006030	14.694
gRNA_27562	BMgn005700	14.684
gRNA_33913	BMgn006857	14.648
gRNA_86636	BMgn016309	14.627
gRNA_50805	BMgn009894	14.551
gRNA_13987	BMgn003021	14.545
gRNA_81391	BMgn015404	14.54
gRNA_31331	BMgn006386	14.538
gRNA_4388	BMgn000952	14.46
gRNA_39500	BMgn007853	14.455
gRNA_18519	BMgn004000	14.403
gRNA_6678	BMgn001449	14.303
gRNA_6002	BMgn001302	14.237
gRNA_22926	BMgn004857	14.228
gRNA_41192	BMgn008155	14.211
gRNA_36564	BMgn007331	14.157
gRNA_70839	BMgn013506	14.099
gRNA_64662	BMgn012387	14.022
gRNA_67023	BMgn012829	13.989
gRNA_57198	BMgn011038	13.941
gRNA_65784	BMgn012597	13.917
gRNA_12916	BMgn002793	13.889
gRNA_42469	BMgn008388	13.866
gRNA_6469	BMgn001402	13.863
gRNA_19015	BMgn004111	13.843
gRNA_10567	BMgn002293	13.808
gRNA_49077	BMgn009580	13.802
gRNA_42155	BMgn008336	13.776
gRNA_50080	BMgn009758	13.76
gRNA_813	BMgn000181	13.663
gRNA_71064	BMgn013545	13.541
gRNA_83633	BMgn015790	13.509
gRNA_6520	BMgn001412	13.506
gRNA_64725	BMgn012397	13.463
gRNA_23110	BMgn004890	13.451
gRNA_74630	BMgn014204	13.372
gRNA_55230	BMgn010693	13.341
gRNA_78029	BMgn014833	13.329
gRNA_12309	BMgn002666	13.316
gRNA_63112	BMgn012108	13.306
gRNA_37551	BMgn007510	13.289
gRNA_39211	BMgn007801	13.257
gRNA_46017	BMgn009022	13.21
gRNA_16665	BMgn003594	13.184
gRNA_57527	BMgn011098	13.162
gRNA_58366	BMgn011259	13.145
gRNA_32270	BMgn006561	13.136
gRNA_74912	BMgn014256	13.107
gRNA_83586	BMgn015782	13.103
gRNA_27558	BMgn005700	13.099
gRNA_38102	BMgn007606	13.038
gRNA_21168	BMgn004542	13.01
gRNA_80045	BMgn015177	13
gRNA_61040	BMgn011742	12.988
gRNA_6922	BMgn001501	12.981
gRNA_45855	BMgn008993	12.975
gRNA_54560	BMgn010576	12.974
gRNA_84933	BMgn016015	12.963
gRNA_48409	BMgn009463	12.952
gRNA_44636	BMgn008781	12.902
gRNA_8827	BMgn001907	12.877
gRNA_19133	BMgn004137	12.871
gRNA_56076	BMgn010840	12.852
gRNA_15434	BMgn003335	12.818
gRNA_45805	BMgn008983	12.811
gRNA_30583	BMgn006249	12.793
gRNA_37245	BMgn007459	12.776
gRNA_28692	BMgn005910	12.774
gRNA_84445	BMgn015929	12.752
gRNA_29417	BMgn006037	12.737
gRNA_10002	BMgn002165	12.709
gRNA_34642	BMgn006986	12.708
gRNA_37947	BMgn007580	12.673
gRNA_26800	BMgn005560	12.664
gRNA_48365	BMgn009456	12.663
gRNA_65425	BMgn012528	12.643
gRNA_25384	BMgn005305	12.641
gRNA_7078	BMgn001533	12.613
gRNA_87320	BMgn016429	12.61
gRNA_38335	BMgn007645	12.604
gRNA_6400	BMgn001387	12.598
gRNA_51497	BMgn010030	12.595
gRNA_44178	BMgn008693	12.553
gRNA_31128	BMgn006348	12.541
gRNA_31328	BMgn006384	12.508
gRNA_15751	BMgn003401	12.444
gRNA_41705	BMgn008255	12.417
gRNA_15572	BMgn003364	12.416
gRNA_50659	BMgn009863	12.405
gRNA_92740	BMgn017370	12.404
gRNA_79822	BMgn015139	12.402
gRNA_33290	BMgn006746	12.4
gRNA_51333	BMgn009999	12.397
gRNA_67859	BMgn012975	12.314
gRNA_55471	BMgn010735	12.309
gRNA_44168	BMgn008691	12.309
gRNA_4457	BMgn000968	12.267
gRNA_18857	BMgn004074	12.248
gRNA_77235	BMgn014698	12.247
gRNA_14810	BMgn003202	12.235
gRNA_624	BMgn000140	12.229
gRNA_66904	BMgn012803	12.221
gRNA_37922	BMgn007576	12.215
gRNA_61545	BMgn011830	12.209
gRNA_42080	BMgn008321	12.2
gRNA_75041	BMgn014280	12.187
gRNA_33850	BMgn006845	12.048
gRNA_52608	BMgn010227	12.014
gRNA_21631	BMgn004628	12.002
gRNA_6508	BMgn001410	12.001
gRNA_72404	BMgn013792	12.001
gRNA_80454	BMgn015246	11.998
gRNA_24717	BMgn005185	11.997
gRNA_70811	BMgn013501	11.899
gRNA_67512	BMgn012914	11.883
gRNA_45492	BMgn008927	11.836
gRNA_62526	BMgn012006	11.834
gRNA_60115	BMgn011576	11.819
gRNA_87696	BMgn016493	11.801
gRNA_26956	BMgn005586	11.798
gRNA_57975	BMgn011187	11.759
gRNA_44029	BMgn008668	11.758
gRNA_39252	BMgn007808	11.758
gRNA_39732	BMgn007896	11.757
gRNA_2822	BMgn000611	11.743
gRNA_13559	BMgn002928	11.71
gRNA_14095	BMgn003045	11.71
gRNA_38285	BMgn007637	11.707
gRNA_38929	BMgn007751	11.692
gRNA_55236	BMgn010694	11.676
gRNA_61521	BMgn011825	11.676
gRNA_62072	BMgn011923	11.67
gRNA_81461	BMgn015416	11.665
gRNA_87412	BMgn016444	11.633
gRNA_56128	BMgn010849	11.632
gRNA_9319	BMgn002014	11.63
gRNA_82001	BMgn015510	11.619
gRNA_10019	BMgn002170	11.596
gRNA_58369	BMgn011260	11.593
gRNA_1701	BMgn000366	11.568
gRNA_39109	BMgn007784	11.566
gRNA_18400	BMgn003977	11.552
gRNA_62292	BMgn011964	11.552
gRNA_88624	BMgn016654	11.543
gRNA_57234	BMgn011045	11.538
gRNA_14255	BMgn003080	11.528
gRNA_56447	BMgn010909	11.506
gRNA_64817	BMgn012414	11.502
gRNA_38457	BMgn007669	11.48
gRNA_10291	BMgn002229	11.479
gRNA_63616	BMgn012197	11.478
gRNA_71483	BMgn013624	11.475
gRNA_13393	BMgn002893	11.454
gRNA_64707	BMgn012394	11.448
gRNA_58846	BMgn011344	11.442
gRNA_278	BMgn000063	11.426
gRNA_33350	BMgn006756	11.425
gRNA_85537	BMgn016120	11.424
gRNA_73783	BMgn014047	11.371
gRNA_17865	BMgn003855	11.353
gRNA_60495	BMgn011646	11.352
gRNA_40020	BMgn007945	11.337
gRNA_16630	BMgn003586	11.325
gRNA_37460	BMgn007495	11.309
gRNA_5288	BMgn001148	11.283
gRNA_93437	BMgn017489	11.273
gRNA_61060	BMgn011745	11.269
gRNA_14574	BMgn003150	11.256
gRNA_39976	BMgn007938	11.254
gRNA_5871	BMgn001274	11.219
gRNA_79772	BMgn015130	11.18
gRNA_22359	BMgn004758	11.164
gRNA_77911	BMgn014813	11.152
gRNA_33865	BMgn006848	11.134
gRNA_87451	BMgn016451	11.129
gRNA_26181	BMgn005450	11.111
gRNA_33952	BMgn006864	11.061
gRNA_86517	BMgn016289	11.056
gRNA_12410	BMgn002687	11.028
gRNA_11123	BMgn002414	11.018
gRNA_12998	BMgn002811	11.01
gRNA_14833	BMgn003208	10.986
gRNA_39233	BMgn007805	10.984
gRNA_91150	BMgn017093	10.982
gRNA_10759	BMgn002337	10.979
gRNA_31464	BMgn006411	10.978
gRNA_13756	BMgn002972	10.975
gRNA_14707	BMgn003180	10.968
gRNA_75182	BMgn014311	10.964
gRNA_40103	BMgn007961	10.956
gRNA_53532	BMgn010396	10.954
gRNA_87056	BMgn016382	10.95
gRNA_49998	BMgn009744	10.939
gRNA_75614	BMgn014399	10.937
gRNA_78801	BMgn014964	10.922
gRNA_78411	BMgn014898	10.919
gRNA_8511	BMgn001841	10.918
gRNA_63637	BMgn012200	10.904
gRNA_34157	BMgn006900	10.901
gRNA_7655	BMgn001657	10.884
gRNA_34934	BMgn007039	10.872
gRNA_36362	BMgn007295	10.869
gRNA_25947	BMgn005406	10.867
gRNA_27947	BMgn005769	10.866
gRNA_29197	BMgn005998	10.865
gRNA_31849	BMgn006489	10.833
gRNA_52740	BMgn010252	10.831
gRNA_3172	BMgn000689	10.827
gRNA_70240	BMgn013400	10.815
gRNA_32078	BMgn006527	10.806
gRNA_59406	BMgn011448	10.792
gRNA_47490	BMgn009298	10.782
gRNA_33664	BMgn006813	10.769
gRNA_26359	BMgn005481	10.751
gRNA_29502	BMgn006053	10.74
gRNA_54036	BMgn010487	10.736
gRNA_7022	BMgn001522	10.728
gRNA_38422	BMgn007661	10.705
gRNA_25487	BMgn005323	10.694
gRNA_14462	BMgn003126	10.685
gRNA_89064	BMgn016731	10.684
gRNA_77349	BMgn014718	10.682
gRNA_83298	BMgn015732	10.661
gRNA_5909	BMgn001282	10.658
gRNA_22278	BMgn004745	10.648
gRNA_33009	BMgn006694	10.62
gRNA_1964	BMgn000424	10.617
gRNA_67712	BMgn012948	10.614
gRNA_46314	BMgn009076	10.597
gRNA_70668	BMgn013477	10.587
gRNA_66566	BMgn012743	10.58
gRNA_55497	BMgn010739	10.573
gRNA_38257	BMgn007632	10.563
gRNA_21649	BMgn004631	10.561
gRNA_55199	BMgn010686	10.526
gRNA_87638	BMgn016482	10.522
gRNA_85845	BMgn016171	10.504
gRNA_10583	BMgn002297	10.493
gRNA_33323	BMgn006752	10.489
gRNA_29253	BMgn006010	10.478
gRNA_93920	BMgn017581	10.466
gRNA_60865	BMgn011709	10.444
gRNA_55949	BMgn010818	10.436
gRNA_48951	BMgn009559	10.418
gRNA_52619	BMgn010228	10.411
gRNA_57211	BMgn011042	10.408
gRNA_38404	BMgn007658	10.406
gRNA_18281	BMgn003949	10.401
gRNA_54322	BMgn010536	10.4
gRNA_70203	BMgn013393	10.397
gRNA_85028	BMgn016031	10.39
gRNA_22022	BMgn004696	10.378
gRNA_13904	BMgn003004	10.356
gRNA_2880	BMgn000625	10.354
gRNA_70871	BMgn013511	10.337
gRNA_71716	BMgn013666	10.336
gRNA_60916	BMgn011720	10.327
gRNA_19011	BMgn004110	10.324
gRNA_38030	BMgn007594	10.323
gRNA_90005	BMgn016894	10.323
gRNA_25376	BMgn005304	10.322
gRNA_50447	BMgn009824	10.312
gRNA_28216	BMgn005820	10.3
gRNA_57810	BMgn011152	10.298
gRNA_57468	BMgn011089	10.295
gRNA_12696	BMgn002745	10.293
gRNA_80150	BMgn015194	10.284
gRNA_37083	BMgn007431	10.278
gRNA_90053	BMgn016903	10.278
gRNA_58308	BMgn011250	10.276
gRNA_3935	BMgn000853	10.27
gRNA_21471	BMgn004598	10.265
gRNA_4541	BMgn000985	10.254
gRNA_32695	BMgn006638	10.249
gRNA_40604	BMgn008050	10.241
gRNA_71276	BMgn013584	10.228
gRNA_19576	BMgn004235	10.227
gRNA_6054	BMgn001313	10.226
gRNA_66074	BMgn012648	10.22
gRNA_6285	BMgn001363	10.207
gRNA_17621	BMgn003798	10.196
gRNA_41308	BMgn008175	10.195
gRNA_27037	BMgn005601	10.19
gRNA_36820	BMgn007381	10.189
gRNA_9961	BMgn002153	10.176
gRNA_40398	BMgn008014	10.165
gRNA_26877	BMgn005573	10.161
gRNA_41877	BMgn008284	10.16
gRNA_35373	BMgn007114	10.159
gRNA_64187	BMgn012297	10.142
gRNA_1007	BMgn000222	10.134
gRNA_85156	BMgn016053	10.124
gRNA_49853	BMgn009720	10.115
gRNA_10560	BMgn002291	10.113
gRNA_26106	BMgn005436	10.108
gRNA_50298	BMgn009797	10.108
gRNA_62467	BMgn011995	10.104
gRNA_60968	BMgn011729	10.101
gRNA_77022	BMgn014661	10.098
gRNA_85043	BMgn016033	10.093
gRNA_45463	BMgn008922	10.086
gRNA_18108	BMgn003911	10.082
gRNA_46834	BMgn009170	10.075
gRNA_91933	BMgn017231	10.075
gRNA_43472	BMgn008569	10.072
gRNA_19826	BMgn004291	10.056
gRNA_38084	BMgn007603	10.027
gRNA_12738	BMgn002755	10.021
gRNA_33284	BMgn006744	10.01
gRNA_34808	BMgn007016	10.002
gRNA_16960	BMgn003659	10
gRNA_11646	BMgn002526	9.9976
gRNA_3521	BMgn000764	9.9954
gRNA_30759	BMgn006282	9.9883
gRNA_15310	BMgn003309	9.9835
gRNA_52546	BMgn010215	9.9716
gRNA_48676	BMgn009510	9.9706
gRNA_67136	BMgn012848	9.9656
gRNA_12942	BMgn002798	9.9645
gRNA_18755	BMgn004054	9.9637
gRNA_56257	BMgn010874	9.9633
gRNA_76515	BMgn014561	9.9588
gRNA_30078	BMgn006158	9.942
gRNA_82625	BMgn015618	9.9362
gRNA_78681	BMgn014943	9.9288
gRNA_60518	BMgn011650	9.9287
gRNA_81689	BMgn015457	9.9161
gRNA_85873	BMgn016176	9.9097
gRNA_68144	BMgn013025	9.909
gRNA_23403	BMgn004941	9.9046
gRNA_34212	BMgn006911	9.8996
gRNA_32810	BMgn006657	9.8986
gRNA_58389	BMgn011263	9.8983
gRNA_7356	BMgn001593	9.8914
gRNA_62367	BMgn011978	9.8877
gRNA_50019	BMgn009747	9.8874
gRNA_12965	BMgn002803	9.8861
gRNA_43201	BMgn008521	9.8849
gRNA_56231	BMgn010868	9.8849
gRNA_83666	BMgn015796	9.871
gRNA_13190	BMgn002851	9.8681
gRNA_2378	BMgn000513	9.8627
gRNA_86367	BMgn016263	9.8599
gRNA_52184	BMgn010154	9.8556
gRNA_61062	BMgn011746	9.8435
gRNA_22361	BMgn004758	9.8415
gRNA_65091	BMgn012470	9.8291
gRNA_22476	BMgn004778	9.8248
gRNA_71339	BMgn013596	9.824
gRNA_63170	BMgn012120	9.8237
gRNA_26001	BMgn005416	9.8177
gRNA_62513	BMgn012004	9.8133
gRNA_51704	BMgn010068	9.8123
gRNA_14464	BMgn003126	9.8096
gRNA_2698	BMgn000583	9.8072
gRNA_61118	BMgn011755	9.8012
gRNA_47023	BMgn009208	9.7979
gRNA_8572	BMgn001853	9.7961
gRNA_33831	BMgn006842	9.7885
gRNA_6840	BMgn001484	9.7882
gRNA_9474	BMgn002047	9.7863
gRNA_27492	BMgn005688	9.7768
gRNA_75604	BMgn014398	9.7702
gRNA_23540	BMgn004963	9.7645
gRNA_50174	BMgn009775	9.7583
gRNA_45040	BMgn008851	9.7562
gRNA_36000	BMgn007233	9.7473
gRNA_60140	BMgn011581	9.7449
gRNA_75144	BMgn014304	9.7418
gRNA_6411	BMgn001389	9.7389
gRNA_28022	BMgn005784	9.7331
gRNA_71284	BMgn013586	9.7281
gRNA_56892	BMgn010986	9.7271
gRNA_12901	BMgn002790	9.7251
gRNA_50513	BMgn009835	9.7244
gRNA_81836	BMgn015482	9.7183
gRNA_13759	BMgn002973	9.7178
gRNA_92488	BMgn017326	9.7165
gRNA_35868	BMgn007210	9.7155
gRNA_86222	BMgn016237	9.7049
gRNA_16040	BMgn003461	9.703
gRNA_32672	BMgn006634	9.7016
gRNA_21325	BMgn004569	9.6952
gRNA_57371	BMgn011071	9.6942
gRNA_3957	BMgn000858	9.6938
gRNA_14785	BMgn003197	9.6755
gRNA_75690	BMgn014412	9.6731
gRNA_61744	BMgn011867	9.6722
gRNA_21872	BMgn004671	9.6592
gRNA_5861	BMgn001272	9.6531
gRNA_66244	BMgn012681	9.6497
gRNA_35192	BMgn007084	9.6455
gRNA_32881	BMgn006671	9.6428
gRNA_47959	BMgn009382	9.6427
gRNA_51559	BMgn010041	9.6313
gRNA_60996	BMgn011735	9.6266
gRNA_55798	BMgn010791	9.6196
gRNA_21541	BMgn004612	9.6185
gRNA_38885	BMgn007741	9.6116
gRNA_13156	BMgn002844	9.5981
gRNA_83939	BMgn015842	9.5959
gRNA_53126	BMgn010323	9.5955
gRNA_51713	BMgn010071	9.5934
gRNA_73546	BMgn014001	9.5893
gRNA_1622	BMgn000350	9.5823
gRNA_32861	BMgn006668	9.5811
gRNA_22228	BMgn004735	9.5808
gRNA_47942	BMgn009379	9.5787
gRNA_35934	BMgn007222	9.5744
gRNA_7028	BMgn001523	9.574
gRNA_4616	BMgn001001	9.5722
gRNA_41162	BMgn008150	9.5715
gRNA_72595	BMgn013827	9.5524
gRNA_34342	BMgn006936	9.552
gRNA_42153	BMgn008335	9.5481
gRNA_20325	BMgn004386	9.5455
gRNA_73943	BMgn014074	9.5448
gRNA_16373	BMgn003532	9.5429
gRNA_5787	BMgn001257	9.5396
gRNA_32624	BMgn006626	9.5154
gRNA_61197	BMgn011769	9.5128
gRNA_70523	BMgn013452	9.51
gRNA_63894	BMgn012247	9.506
gRNA_56742	BMgn010959	9.5027
gRNA_54809	BMgn010621	9.5027
gRNA_34174	BMgn006903	9.4963
gRNA_55279	BMgn010702	9.4787
gRNA_15967	BMgn003446	9.478
gRNA_6093	BMgn001322	9.4717
gRNA_12172	BMgn002637	9.4687
gRNA_77803	BMgn014795	9.4673
gRNA_15811	BMgn003413	9.466
gRNA_69387	BMgn013251	9.4613
gRNA_86238	BMgn016240	9.4526
gRNA_76115	BMgn014487	9.4504
gRNA_68275	BMgn013055	9.4498
gRNA_6436	BMgn001395	9.4494
gRNA_89988	BMgn016891	9.4431
gRNA_85793	BMgn016162	9.4429
gRNA_75708	BMgn014415	9.4404
gRNA_29174	BMgn005994	9.4362
gRNA_76572	BMgn014572	9.4353
gRNA_48594	BMgn009496	9.4274
gRNA_54105	BMgn010499	9.4271
gRNA_29170	BMgn005994	9.423
gRNA_33097	BMgn006711	9.4167
gRNA_39465	BMgn007847	9.4121
gRNA_39989	BMgn007940	9.4119
gRNA_3862	BMgn000839	9.4117
gRNA_48079	BMgn009403	9.4085
gRNA_83827	BMgn015823	9.4073
gRNA_41652	BMgn008247	9.4049
gRNA_54195	BMgn010514	9.4025
gRNA_76288	BMgn014522	9.4012
gRNA_54039	BMgn010487	9.3998
gRNA_12979	BMgn002808	9.3918
gRNA_12742	BMgn002755	9.385
gRNA_50489	BMgn009831	9.3822
gRNA_10864	BMgn002359	9.3697
gRNA_75929	BMgn014455	9.3644
gRNA_41206	BMgn008157	9.3637
gRNA_3963	BMgn000859	9.3615
gRNA_53193	BMgn010336	9.3564
gRNA_58438	BMgn011271	9.3544
gRNA_60373	BMgn011620	9.3405
gRNA_45521	BMgn008932	9.3378
gRNA_52734	BMgn010251	9.3332
gRNA_66734	BMgn012772	9.3278
gRNA_57698	BMgn011131	9.3113
gRNA_92009	BMgn017244	9.3028
gRNA_8575	BMgn001853	9.298
gRNA_4007	BMgn000868	9.2939
gRNA_30367	BMgn006210	9.2929
gRNA_46165	BMgn009049	9.2901
gRNA_21681	BMgn004637	9.2854
gRNA_34966	BMgn007044	9.2797
gRNA_56439	BMgn010907	9.272
gRNA_64057	BMgn012275	9.2695
gRNA_44186	BMgn008694	9.2627
gRNA_4362	BMgn000946	9.2454
gRNA_29986	BMgn006140	9.2308
gRNA_44985	BMgn008842	9.2247
gRNA_82576	BMgn015609	9.2244
gRNA_3676	BMgn000800	9.2225
gRNA_46582	BMgn009126	9.2209
gRNA_17472	BMgn003766	9.2189
gRNA_90533	BMgn016988	9.2034
gRNA_85789	BMgn016162	9.1987
gRNA_68593	BMgn013112	9.1984
gRNA_67947	BMgn012992	9.196
gRNA_10222	BMgn002215	9.1951
gRNA_44265	BMgn008709	9.1921
gRNA_54035	BMgn010487	9.1886
gRNA_24393	BMgn005126	9.1881
gRNA_69267	BMgn013230	9.1821
gRNA_65103	BMgn012472	9.1728
gRNA_47763	BMgn009346	9.1712
gRNA_13590	BMgn002934	9.1697
gRNA_82365	BMgn015572	9.1642
gRNA_16869	BMgn003640	9.1638
gRNA_26164	BMgn005447	9.1638
gRNA_48458	BMgn009473	9.1624
gRNA_53954	BMgn010473	9.1606
gRNA_81715	BMgn015461	9.1579
gRNA_36579	BMgn007334	9.1557
gRNA_29646	BMgn006077	9.1539
gRNA_75024	BMgn014277	9.1528
gRNA_74359	BMgn014149	9.1465
gRNA_28807	BMgn005930	9.1439
gRNA_73495	BMgn013990	9.1347
gRNA_24885	BMgn005217	9.1336
gRNA_72407	BMgn013793	9.1335
gRNA_17213	BMgn003712	9.1304
gRNA_78916	BMgn014984	9.1246
gRNA_41600	BMgn008238	9.1212
gRNA_12212	BMgn002645	9.1202
gRNA_68266	BMgn013053	9.1152
gRNA_8944	BMgn001931	9.1138
gRNA_72432	BMgn013797	9.1126
gRNA_9794	BMgn002117	9.1081
gRNA_5678	BMgn001233	9.1035
gRNA_41307	BMgn008175	9.1008
gRNA_59912	BMgn011539	9.0998
gRNA_33240	BMgn006737	9.0928
gRNA_85513	BMgn016116	9.0919
gRNA_51429	BMgn010015	9.0884
gRNA_24678	BMgn005177	9.0877
gRNA_15502	BMgn003350	9.0874
gRNA_79862	BMgn015145	9.0813
gRNA_30619	BMgn006258	9.0782
gRNA_60346	BMgn011615	9.0746
gRNA_44569	BMgn008768	9.0659
gRNA_11925	BMgn002586	9.0591
gRNA_4813	BMgn001043	9.059
gRNA_9139	BMgn001975	9.0549
gRNA_44434	BMgn008739	9.0547
gRNA_43516	BMgn008578	9.0535
gRNA_54426	BMgn010553	9.0528
gRNA_89271	BMgn016767	9.0528
gRNA_36642	BMgn007344	9.0456
gRNA_43334	BMgn008546	9.0446
gRNA_13747	BMgn002968	9.0387
gRNA_72991	BMgn013898	9.0366
gRNA_44012	BMgn008665	9.036
gRNA_67777	BMgn012960	9.0346
gRNA_63877	BMgn012244	9.031
gRNA_67942	BMgn012991	9.0308
gRNA_66348	BMgn012700	9.0307
gRNA_57697	BMgn011131	9.0287
gRNA_14738	BMgn003186	9.0285
gRNA_65084	BMgn012469	9.0274
gRNA_32732	BMgn006644	9.0274
gRNA_54811	BMgn010621	9.0225
gRNA_60372	BMgn011620	9.022
gRNA_71773	BMgn013678	9.0141
gRNA_56207	BMgn010864	9.0112
gRNA_26292	BMgn005470	9.008
gRNA_54472	BMgn010561	9.0016
gRNA_20157	BMgn004356	8.9927
gRNA_21948	BMgn004684	8.99
gRNA_55816	BMgn010794	8.9875
gRNA_58886	BMgn011353	8.9865
gRNA_50768	BMgn009888	8.9845
gRNA_1212	BMgn000267	8.9827
gRNA_13849	BMgn002991	8.9818
gRNA_58539	BMgn011290	8.9785
gRNA_33970	BMgn006867	8.9773
gRNA_5256	BMgn001142	8.9754
gRNA_38334	BMgn007645	8.9698
gRNA_76664	BMgn014596	8.9683
gRNA_61563	BMgn011833	8.9681
gRNA_32549	BMgn006613	8.9637
gRNA_6005	BMgn001302	8.959
gRNA_51172	BMgn009968	8.9546
gRNA_30315	BMgn006201	8.946
gRNA_27958	BMgn005771	8.946
gRNA_43224	BMgn008525	8.9455
gRNA_50747	BMgn009883	8.9388
gRNA_62717	BMgn012038	8.9338
gRNA_30781	BMgn006285	8.9318
gRNA_92092	BMgn017258	8.9286
gRNA_65185	BMgn012487	8.9263
gRNA_82364	BMgn015572	8.9247
gRNA_14953	BMgn003234	8.9246
gRNA_13126	BMgn002837	8.9207
gRNA_35707	BMgn007178	8.9169
gRNA_20082	BMgn004344	8.9155
gRNA_39457	BMgn007845	8.9085
gRNA_26736	BMgn005550	8.9079
gRNA_3457	BMgn000750	8.9045
gRNA_45222	BMgn008881	8.9043
gRNA_84947	BMgn016017	8.9033
gRNA_46829	BMgn009169	8.9001
gRNA_87033	BMgn016378	8.8919
gRNA_36499	BMgn007319	8.8874
gRNA_89070	BMgn016733	8.8761
gRNA_40377	BMgn008010	8.8717
gRNA_59053	BMgn011381	8.869
gRNA_50868	BMgn009905	8.8656
gRNA_45838	BMgn008990	8.8624
gRNA_1629	BMgn000352	8.8621
gRNA_8045	BMgn001739	8.8618
gRNA_96	BMgn000022	8.8591
gRNA_33760	BMgn006829	8.8583
gRNA_72449	BMgn013801	8.8563
gRNA_23488	BMgn004955	8.8515
gRNA_39729	BMgn007896	8.851
gRNA_16598	BMgn003580	8.8442
gRNA_26051	BMgn005425	8.8426
gRNA_49908	BMgn009729	8.8378
gRNA_38194	BMgn007622	8.8349
gRNA_9998	BMgn002164	8.8343
gRNA_44662	BMgn008785	8.831
gRNA_38430	BMgn007662	8.8305
gRNA_87167	BMgn016402	8.8289
gRNA_15027	BMgn003249	8.8265
gRNA_51080	BMgn009950	8.8263
gRNA_57939	BMgn011178	8.82
gRNA_35655	BMgn007169	8.8187
gRNA_41688	BMgn008253	8.8175
gRNA_39468	BMgn007847	8.8169
gRNA_16928	BMgn003652	8.8137
gRNA_89246	BMgn016763	8.8133
gRNA_67151	BMgn012851	8.8058
gRNA_5042	BMgn001094	8.8012
gRNA_91934	BMgn017231	8.7947
gRNA_32052	BMgn006523	8.7935
gRNA_41833	BMgn008277	8.7904
gRNA_8705	BMgn001880	8.7901
gRNA_39566	BMgn007868	8.7874
gRNA_66751	BMgn012775	8.7821
gRNA_10986	BMgn002385	8.7747
gRNA_80785	BMgn015302	8.769
gRNA_62070	BMgn011923	8.7678
gRNA_82309	BMgn015563	8.7652
gRNA_35982	BMgn007230	8.7648
gRNA_86208	BMgn016235	8.7638
gRNA_40864	BMgn008096	8.7633
gRNA_35617	BMgn007162	8.7594
gRNA_89329	BMgn016778	8.7582
gRNA_65944	BMgn012625	8.7514
gRNA_58598	BMgn011299	8.7462
gRNA_35228	BMgn007090	8.7446
gRNA_72348	BMgn013783	8.743
gRNA_34089	BMgn006888	8.7426
gRNA_70664	BMgn013476	8.7409
gRNA_7560	BMgn001637	8.7322
gRNA_19251	BMgn004164	8.7313
gRNA_89120	BMgn016742	8.7256
gRNA_13089	BMgn002830	8.7253
gRNA_39580	BMgn007870	8.7163
gRNA_35849	BMgn007205	8.7127
gRNA_65704	BMgn012583	8.7082
gRNA_51662	BMgn010060	8.7068
gRNA_6899	BMgn001496	8.7051
gRNA_69919	BMgn013344	8.7048
gRNA_35169	BMgn007080	8.7025
gRNA_7026	BMgn001522	8.6993
gRNA_14355	BMgn003100	8.6979
gRNA_31694	BMgn006459	8.6941
gRNA_55570	BMgn010751	8.6883
gRNA_6935	BMgn001503	8.6807
gRNA_91425	BMgn017141	8.6732
gRNA_41523	BMgn008221	8.6684
gRNA_57856	BMgn011163	8.668
gRNA_37814	BMgn007554	8.6651
gRNA_33138	BMgn006719	8.6629
gRNA_27307	BMgn005654	8.6606
gRNA_73868	BMgn014061	8.6603
gRNA_9017	BMgn001950	8.6599
gRNA_87591	BMgn016475	8.6598
gRNA_84594	BMgn015956	8.6592
gRNA_31477	BMgn006414	8.6587
gRNA_80321	BMgn015224	8.6547
gRNA_13440	BMgn002903	8.6522
gRNA_78900	BMgn014981	8.6517
gRNA_88483	BMgn016628	8.6507
gRNA_41980	BMgn008302	8.6479
gRNA_35247	BMgn007093	8.6454
gRNA_45528	BMgn008933	8.6446
gRNA_10344	BMgn002241	8.6433
gRNA_35203	BMgn007086	8.6372
gRNA_73649	BMgn014023	8.6363
gRNA_26190	BMgn005451	8.6333
gRNA_43609	BMgn008596	8.6331
gRNA_38403	BMgn007658	8.6318
gRNA_70595	BMgn013464	8.6305
gRNA_59658	BMgn011491	8.63
gRNA_53400	BMgn010373	8.6293
gRNA_37963	BMgn007582	8.6279
gRNA_77667	BMgn014772	8.6252
gRNA_29517	BMgn006056	8.6225
gRNA_27250	BMgn005642	8.6208
gRNA_77899	BMgn014811	8.6185
gRNA_79156	BMgn015025	8.6182
gRNA_33540	BMgn006792	8.6161
gRNA_52615	BMgn010228	8.6149
gRNA_52436	BMgn010196	8.6147
gRNA_79406	BMgn015067	8.6133
gRNA_6006	BMgn001302	8.6104
gRNA_62021	BMgn011914	8.6101
gRNA_76551	BMgn014567	8.6086
gRNA_86756	BMgn016330	8.608
gRNA_55090	BMgn010668	8.5997
gRNA_57827	BMgn011155	8.5992
gRNA_38197	BMgn007622	8.5991
gRNA_22909	BMgn004853	8.5981
gRNA_3689	BMgn000802	8.5972
gRNA_44114	BMgn008682	8.597
gRNA_54801	BMgn010619	8.596
gRNA_84416	BMgn015924	8.5958
gRNA_37254	BMgn007460	8.5953
gRNA_7962	BMgn001722	8.5945
gRNA_90940	BMgn017057	8.5912
gRNA_43560	BMgn008588	8.5904
gRNA_18017	BMgn003892	8.5892
gRNA_74041	BMgn014092	8.5875
gRNA_51647	BMgn010057	8.5871
gRNA_82235	BMgn015549	8.5805
gRNA_4771	BMgn001035	8.5804
gRNA_5095	BMgn001106	8.5795
gRNA_37277	BMgn007464	8.5781
gRNA_44893	BMgn008825	8.5762
gRNA_93434	BMgn017489	8.5758
gRNA_14582	BMgn003152	8.5749
gRNA_66762	BMgn012776	8.5746
gRNA_75083	BMgn014290	8.5702
gRNA_68595	BMgn013112	8.5683
gRNA_77521	BMgn014748	8.562
gRNA_92350	BMgn017302	8.5616
gRNA_69403	BMgn013255	8.5592
gRNA_56002	BMgn010827	8.5588
gRNA_13918	BMgn003007	8.558
gRNA_48843	BMgn009539	8.5579
gRNA_14739	BMgn003186	8.5577
gRNA_58033	BMgn011197	8.5559
gRNA_16518	BMgn003564	8.5532
gRNA_68122	BMgn013021	8.5528
gRNA_32629	BMgn006627	8.5509
gRNA_65852	BMgn012610	8.5508
gRNA_90674	BMgn017011	8.5507
gRNA_907	BMgn000201	8.5467
gRNA_85335	BMgn016085	8.5464
gRNA_20496	BMgn004415	8.5455
gRNA_62724	BMgn012039	8.545
gRNA_68521	BMgn013100	8.5336
gRNA_13733	BMgn002966	8.5325
gRNA_43494	BMgn008573	8.5309
gRNA_25656	BMgn005352	8.5287
gRNA_67608	BMgn012931	8.5257
gRNA_2401	BMgn000518	8.5235
gRNA_1866	BMgn000401	8.5227
gRNA_21271	BMgn004560	8.5202
gRNA_18494	BMgn003995	8.513
gRNA_13152	BMgn002843	8.5112
gRNA_3314	BMgn000718	8.5024
gRNA_26888	BMgn005575	8.5006
gRNA_92149	BMgn017268	8.5006
gRNA_2363	BMgn000509	8.4981
gRNA_61472	BMgn011817	8.4949
gRNA_35864	BMgn007210	8.4914
gRNA_82669	BMgn015625	8.4856
gRNA_85041	BMgn016033	8.4855
gRNA_86483	BMgn016283	8.4839
gRNA_16688	BMgn003600	8.4804
gRNA_41782	BMgn008268	8.4797
gRNA_22034	BMgn004698	8.4774
gRNA_34791	BMgn007011	8.4763
gRNA_41073	BMgn008135	8.4763
gRNA_74277	BMgn014133	8.4749
gRNA_18440	BMgn003985	8.4717
gRNA_40415	BMgn008016	8.4697
gRNA_27120	BMgn005619	8.467
gRNA_36001	BMgn007233	8.4648
gRNA_55720	BMgn010777	8.4637
gRNA_10316	BMgn002234	8.4572
gRNA_26053	BMgn005425	8.457
gRNA_37754	BMgn007544	8.4561
gRNA_21009	BMgn004510	8.4512
gRNA_8160	BMgn001766	8.4509
gRNA_16756	BMgn003616	8.4472
gRNA_60344	BMgn011615	8.4394
gRNA_5083	BMgn001102	8.4369
gRNA_77435	BMgn014732	8.4349
gRNA_25488	BMgn005323	8.4294
gRNA_60062	BMgn011565	8.4216
gRNA_65345	BMgn012514	8.4192
gRNA_80371	BMgn015232	8.4192
gRNA_57708	BMgn011133	8.4174
gRNA_21826	BMgn004661	8.4134
gRNA_10760	BMgn002338	8.4091
gRNA_50066	BMgn009755	8.4049
gRNA_79901	BMgn015152	8.4036
gRNA_50287	BMgn009795	8.4015
gRNA_40182	BMgn007974	8.4011
gRNA_13744	BMgn002968	8.3998
gRNA_66025	BMgn012638	8.3997
gRNA_77299	BMgn014709	8.398
gRNA_18164	BMgn003923	8.3967
gRNA_21828	BMgn004661	8.3943
gRNA_48991	BMgn009566	8.3932
gRNA_14517	BMgn003139	8.3926
gRNA_75755	BMgn014423	8.3916
gRNA_25292	BMgn005288	8.3896
gRNA_82053	BMgn015519	8.3895
gRNA_46841	BMgn009172	8.3884
gRNA_46810	BMgn009166	8.3819
gRNA_20052	BMgn004337	8.3812
gRNA_921	BMgn000204	8.3811
gRNA_91598	BMgn017173	8.3798
gRNA_28031	BMgn005785	8.3787
gRNA_41989	BMgn008304	8.3763
gRNA_63235	BMgn012131	8.3742
gRNA_15575	BMgn003364	8.3738
gRNA_36153	BMgn007261	8.3701
gRNA_13757	BMgn002972	8.3658
gRNA_50286	BMgn009795	8.3649
gRNA_25627	BMgn005347	8.3622
gRNA_9080	BMgn001963	8.3617
gRNA_87097	BMgn016390	8.357
gRNA_19189	BMgn004150	8.3559
gRNA_86350	BMgn016260	8.349
gRNA_69899	BMgn013340	8.3409
gRNA_15715	BMgn003393	8.3396
gRNA_61462	BMgn011816	8.3391
gRNA_44154	BMgn008689	8.3379
gRNA_73146	BMgn013924	8.3349
gRNA_12505	BMgn002707	8.3343
gRNA_10105	BMgn002188	8.333
gRNA_29069	BMgn005977	8.3329
gRNA_86231	BMgn016238	8.3323
gRNA_14753	BMgn003189	8.3285
gRNA_17272	BMgn003725	8.3283
gRNA_85720	BMgn016150	8.3259
gRNA_47166	BMgn009236	8.3254
gRNA_12792	BMgn002766	8.3234
gRNA_21027	BMgn004513	8.3222
gRNA_56560	BMgn010929	8.3221
gRNA_1448	BMgn000315	8.3199
gRNA_72079	BMgn013729	8.3196
gRNA_78700	BMgn014947	8.3183
gRNA_62629	BMgn012023	8.3149
gRNA_29797	BMgn006103	8.3135
gRNA_61334	BMgn011793	8.3125
gRNA_75699	BMgn014414	8.3117
gRNA_21087	BMgn004524	8.311
gRNA_79106	BMgn015017	8.3079
gRNA_55281	BMgn010702	8.3069
gRNA_79648	BMgn015110	8.3039
gRNA_47913	BMgn009373	8.3029
gRNA_31479	BMgn006414	8.3008
gRNA_13136	BMgn002840	8.3005
gRNA_66855	BMgn012793	8.2943
gRNA_53352	BMgn010365	8.294
gRNA_73445	BMgn013982	8.2898
gRNA_20609	BMgn004438	8.2853
gRNA_22922	BMgn004856	8.285
gRNA_3262	BMgn000708	8.2838
gRNA_15806	BMgn003412	8.2838
gRNA_57842	BMgn011158	8.2821
gRNA_77866	BMgn014805	8.279
gRNA_21141	BMgn004537	8.2781
gRNA_89904	BMgn016877	8.2724
gRNA_75498	BMgn014377	8.265
gRNA_332	BMgn000074	8.2644
gRNA_13656	BMgn002948	8.2638
gRNA_81621	BMgn015444	8.2633
gRNA_3477	BMgn000754	8.2626
gRNA_34993	BMgn007048	8.2611
gRNA_76579	BMgn014574	8.2595
gRNA_37958	BMgn007582	8.2586
gRNA_40068	BMgn007954	8.2506
gRNA_88337	BMgn016604	8.2479
gRNA_5766	BMgn001252	8.2458
gRNA_87467	BMgn016454	8.2436
gRNA_44892	BMgn008825	8.2435
gRNA_6923	BMgn001501	8.2393
gRNA_55618	BMgn010759	8.2363
gRNA_18460	BMgn003989	8.2319
gRNA_67022	BMgn012829	8.2294
gRNA_80765	BMgn015299	8.2293
gRNA_63649	BMgn012202	8.2275
gRNA_48814	BMgn009534	8.2245
gRNA_34256	BMgn006919	8.223
gRNA_45310	BMgn008897	8.2209
gRNA_17898	BMgn003862	8.2182
gRNA_26571	BMgn005519	8.2169
gRNA_28296	BMgn005834	8.2158
gRNA_4425	BMgn000961	8.2145
gRNA_42436	BMgn008382	8.2134
gRNA_31301	BMgn006379	8.213
gRNA_52183	BMgn010154	8.2115
gRNA_74117	BMgn014105	8.2088
gRNA_90994	BMgn017067	8.2072
gRNA_90918	BMgn017054	8.2028
gRNA_63779	BMgn012226	8.2027
gRNA_50557	BMgn009845	8.2025
gRNA_75085	BMgn014290	8.1955
gRNA_14576	BMgn003151	8.1953
gRNA_15754	BMgn003401	8.1936
gRNA_74656	BMgn014209	8.1921
gRNA_26872	BMgn005572	8.192
gRNA_62235	BMgn011955	8.1907
gRNA_62214	BMgn011950	8.1898
gRNA_36692	BMgn007355	8.1878
gRNA_56317	BMgn010884	8.1844
gRNA_45293	BMgn008894	8.1844
gRNA_55334	BMgn010711	8.1843
gRNA_72121	BMgn013736	8.1829
gRNA_88893	BMgn016701	8.1808
gRNA_40632	BMgn008055	8.1807
gRNA_22204	BMgn004731	8.1769
gRNA_65541	BMgn012554	8.1761
gRNA_76701	BMgn014602	8.1759
gRNA_65198	BMgn012489	8.1749
gRNA_50726	BMgn009880	8.1739
gRNA_21745	BMgn004647	8.1732
gRNA_15503	BMgn003350	8.1712
gRNA_35483	BMgn007137	8.1711
gRNA_75751	BMgn014423	8.1694
gRNA_31006	BMgn006327	8.1662
gRNA_93782	BMgn017552	8.1658
gRNA_46904	BMgn009184	8.1656
gRNA_79863	BMgn015145	8.1655
gRNA_65594	BMgn012564	8.1643
gRNA_74283	BMgn014135	8.1615
gRNA_88240	BMgn016587	8.1613
gRNA_53772	BMgn010438	8.161
gRNA_70760	BMgn013493	8.1553
gRNA_5479	BMgn001190	8.1518
gRNA_57949	BMgn011181	8.1488
gRNA_70820	BMgn013503	8.1484
gRNA_43316	BMgn008542	8.1479
gRNA_16826	BMgn003631	8.1468
gRNA_79048	BMgn015007	8.1442
gRNA_59699	BMgn011498	8.144
gRNA_18296	BMgn003952	8.1437
gRNA_75633	BMgn014403	8.1435
gRNA_82276	BMgn015558	8.1403
gRNA_9964	BMgn002153	8.1398
gRNA_6778	BMgn001471	8.1392
gRNA_85302	BMgn016079	8.1371
gRNA_53571	BMgn010402	8.1366
gRNA_29810	BMgn006105	8.1351
gRNA_63089	BMgn012104	8.1341
gRNA_91215	BMgn017105	8.1321
gRNA_78722	BMgn014950	8.1312
gRNA_70319	BMgn013413	8.1298
gRNA_29071	BMgn005977	8.1297
gRNA_6810	BMgn001478	8.1274
gRNA_74529	BMgn014185	8.1244
gRNA_41068	BMgn008134	8.1237
gRNA_92675	BMgn017358	8.1214
gRNA_68317	BMgn013063	8.1202
gRNA_69922	BMgn013344	8.1202
gRNA_53539	BMgn010397	8.1175
gRNA_71785	BMgn013680	8.116
gRNA_60930	BMgn011723	8.1135
gRNA_69141	BMgn013209	8.1112
gRNA_31354	BMgn006391	8.1109
gRNA_66280	BMgn012688	8.1104
gRNA_35602	BMgn007157	8.1104
gRNA_11344	BMgn002460	8.1087
gRNA_34672	BMgn006991	8.1063
gRNA_11534	BMgn002504	8.1059
gRNA_21374	BMgn004577	8.1051
gRNA_76631	BMgn014590	8.103
gRNA_5238	BMgn001137	8.1011
gRNA_85788	BMgn016162	8.1008
gRNA_16198	BMgn003496	8.1005
gRNA_5387	BMgn001169	8.0981
gRNA_3504	BMgn000760	8.0969
gRNA_29267	BMgn006012	8.0964
gRNA_90503	BMgn016982	8.093
gRNA_7558	BMgn001637	8.09
gRNA_92686	BMgn017361	8.0898
gRNA_26928	BMgn005582	8.0865
gRNA_14682	BMgn003172	8.0859
gRNA_85709	BMgn016148	8.0842
gRNA_24454	BMgn005136	8.0811
gRNA_23199	BMgn004905	8.0797
gRNA_53565	BMgn010401	8.0796
gRNA_59428	BMgn011451	8.0778
gRNA_54622	BMgn010588	8.0775
gRNA_13995	BMgn003023	8.073
gRNA_75879	BMgn014446	8.0676
gRNA_41341	BMgn008182	8.0674
gRNA_89266	BMgn016767	8.0673
gRNA_33094	BMgn006711	8.0652
gRNA_17003	BMgn003668	8.0641
gRNA_28088	BMgn005797	8.061
gRNA_26047	BMgn005424	8.0575
gRNA_33366	BMgn006759	8.0563
gRNA_77477	BMgn014739	8.0541
gRNA_3930	BMgn000852	8.0531
gRNA_24894	BMgn005218	8.0526
gRNA_5094	BMgn001106	8.0506
gRNA_32761	BMgn006649	8.0498
gRNA_34729	BMgn007000	8.0484
gRNA_79796	BMgn015134	8.047
gRNA_35311	BMgn007104	8.046
gRNA_8710	BMgn001881	8.0453
gRNA_59228	BMgn011416	8.0448
gRNA_39039	BMgn007773	8.0429
gRNA_1855	BMgn000399	8.0416
gRNA_31960	BMgn006507	8.0399
gRNA_18443	BMgn003985	8.037
gRNA_50575	BMgn009848	8.0359
gRNA_53178	BMgn010333	8.034
gRNA_24463	BMgn005138	8.0285
gRNA_6395	BMgn001386	8.0275
gRNA_31692	BMgn006459	8.0258
gRNA_20364	BMgn004393	8.0255
gRNA_72211	BMgn013758	8.0232
gRNA_13548	BMgn002926	8.0218
gRNA_55119	BMgn010673	8.0216
gRNA_21260	BMgn004558	8.0193
gRNA_4414	BMgn000959	8.0176
gRNA_46301	BMgn009074	8.0157
gRNA_3459	BMgn000750	8.013
gRNA_15559	BMgn003361	8.0129
gRNA_11377	BMgn002467	8.0084
gRNA_62285	BMgn011963	8.0064
gRNA_69830	BMgn013328	8.006
gRNA_6773	BMgn001470	8.0058
gRNA_33634	BMgn006808	8.0033
gRNA_47470	BMgn009294	7.9988
gRNA_16106	BMgn003475	7.9929
gRNA_49364	BMgn009630	7.9923
gRNA_84804	BMgn015993	7.9898
gRNA_83563	BMgn015778	7.9891
gRNA_70638	BMgn013472	7.9884
gRNA_59422	BMgn011450	7.9861
gRNA_50549	BMgn009842	7.9861
gRNA_55191	BMgn010685	7.984
gRNA_50922	BMgn009917	7.9836
gRNA_87532	BMgn016465	7.9827
gRNA_81245	BMgn015380	7.9777
gRNA_73518	BMgn013995	7.977
gRNA_81809	BMgn015477	7.9765
gRNA_84474	BMgn015935	7.9761
gRNA_26860	BMgn005570	7.9742
gRNA_34524	BMgn006966	7.9728
gRNA_67813	BMgn012967	7.9716
gRNA_15311	BMgn003309	7.97
gRNA_86150	BMgn016224	7.969
gRNA_1542	BMgn000334	7.9686
gRNA_681	BMgn000154	7.9672
gRNA_60274	BMgn011603	7.9634
gRNA_70929	BMgn013521	7.9632
gRNA_60083	BMgn011568	7.9632
gRNA_38245	BMgn007630	7.9624
gRNA_49266	BMgn009612	7.9589
gRNA_53382	BMgn010370	7.9584
gRNA_68594	BMgn013112	7.9532
gRNA_64714	BMgn012396	7.9496
gRNA_34049	BMgn006880	7.9473
gRNA_15968	BMgn003446	7.9459
gRNA_54967	BMgn010647	7.9396
gRNA_14773	BMgn003195	7.9382
gRNA_82362	BMgn015572	7.9345
gRNA_52181	BMgn010154	7.9345
gRNA_64344	BMgn012328	7.9341
gRNA_18501	BMgn003997	7.9327
gRNA_12715	BMgn002750	7.9307
gRNA_76231	BMgn014512	7.9294
gRNA_52070	BMgn010135	7.929
gRNA_996	BMgn000219	7.9286
gRNA_62904	BMgn012072	7.9281
gRNA_22031	BMgn004698	7.9267
gRNA_30436	BMgn006222	7.9264
gRNA_82525	BMgn015600	7.9264
gRNA_23644	BMgn004981	7.9258
gRNA_73829	BMgn014054	7.9243
gRNA_48410	BMgn009463	7.9239
gRNA_38463	BMgn007670	7.9239
gRNA_16611	BMgn003582	7.923
gRNA_7487	BMgn001622	7.9229
gRNA_64919	BMgn012434	7.9219
gRNA_10328	BMgn002236	7.9218
gRNA_75712	BMgn014416	7.9214
gRNA_15991	BMgn003451	7.9213
gRNA_36492	BMgn007318	7.9194
gRNA_81446	BMgn015413	7.9187
gRNA_64198	BMgn012299	7.9179
gRNA_33751	BMgn006828	7.9172
gRNA_87906	BMgn016530	7.916
gRNA_41203	BMgn008157	7.9159
gRNA_2266	BMgn000488	7.9156
gRNA_30363	BMgn006209	7.9141
gRNA_9689	BMgn002095	7.9139
gRNA_61069	BMgn011747	7.9097
gRNA_73247	BMgn013943	7.9063
gRNA_74210	BMgn014122	7.9061
gRNA_85039	BMgn016033	7.9052
gRNA_28332	BMgn005840	7.9021
gRNA_23599	BMgn004973	7.9019
gRNA_80595	BMgn015270	7.9009
gRNA_27657	BMgn005718	7.9001
gRNA_37064	BMgn007428	7.899
gRNA_13466	BMgn002908	7.8985
gRNA_86522	BMgn016290	7.8981
gRNA_2819	BMgn000610	7.8954
gRNA_89746	BMgn016851	7.8913
gRNA_17365	BMgn003744	7.8863
gRNA_32515	BMgn006607	7.8857
gRNA_34400	BMgn006946	7.8826
gRNA_21543	BMgn004612	7.8805
gRNA_52091	BMgn010139	7.8804
gRNA_50402	BMgn009817	7.8797
gRNA_34643	BMgn006986	7.8782
gRNA_80315	BMgn015223	7.8775
gRNA_4141	BMgn000898	7.8769
gRNA_33947	BMgn006863	7.8764
gRNA_34954	BMgn007042	7.876
gRNA_40438	BMgn008020	7.8758
gRNA_64142	BMgn012290	7.8757
gRNA_44852	BMgn008818	7.8752
gRNA_63136	BMgn012112	7.873
gRNA_59652	BMgn011490	7.8687
gRNA_52851	BMgn010273	7.8679
gRNA_66458	BMgn012722	7.8659
gRNA_78643	BMgn014937	7.8653
gRNA_70456	BMgn013441	7.8643
gRNA_71671	BMgn013656	7.8615
gRNA_10771	BMgn002340	7.8613
gRNA_66251	BMgn012683	7.861
gRNA_33715	BMgn006822	7.8595
gRNA_37611	BMgn007520	7.859
gRNA_37608	BMgn007519	7.8573
gRNA_71781	BMgn013680	7.855
gRNA_16883	BMgn003642	7.8523
gRNA_74466	BMgn014174	7.849
gRNA_93275	BMgn017461	7.8472
gRNA_88930	BMgn016709	7.844
gRNA_62539	BMgn012008	7.8429
gRNA_39597	BMgn007873	7.8418
gRNA_78482	BMgn014910	7.8398
gRNA_66988	BMgn012821	7.8347
gRNA_16684	BMgn003599	7.8328
gRNA_17525	BMgn003777	7.8276
gRNA_54828	BMgn010624	7.8226
gRNA_11951	BMgn002591	7.8182
gRNA_41261	BMgn008166	7.815
gRNA_44987	BMgn008842	7.8143
gRNA_24316	BMgn005111	7.8138
gRNA_57103	BMgn011022	7.8136
gRNA_75419	BMgn014363	7.8127
gRNA_10325	BMgn002236	7.8116
gRNA_55343	BMgn010712	7.811
gRNA_19256	BMgn004165	7.8071
gRNA_524	BMgn000117	7.802
gRNA_33876	BMgn006851	7.7999
gRNA_51212	BMgn009975	7.7982
gRNA_91415	BMgn017140	7.7979
gRNA_42802	BMgn008447	7.79
gRNA_78179	BMgn014859	7.7894
gRNA_69401	BMgn013255	7.7874
gRNA_38196	BMgn007622	7.787
gRNA_91688	BMgn017188	7.7781
gRNA_48379	BMgn009458	7.7777
gRNA_91950	BMgn017234	7.7769
gRNA_53341	BMgn010363	7.7769
gRNA_21354	BMgn004573	7.7712
gRNA_29007	BMgn005966	7.7638
gRNA_31888	BMgn006495	7.7638
gRNA_11127	BMgn002415	7.7593
gRNA_19252	BMgn004165	7.7586
gRNA_34875	BMgn007027	7.7584
gRNA_51710	BMgn010069	7.7582
gRNA_88917	BMgn016706	7.7555
gRNA_12514	BMgn002709	7.7535
gRNA_5763	BMgn001250	7.7532
gRNA_61428	BMgn011809	7.748
gRNA_21657	BMgn004632	7.7426
gRNA_57701	BMgn011131	7.7417
gRNA_74751	BMgn014229	7.7398
gRNA_32671	BMgn006634	7.7387
gRNA_17655	BMgn003805	7.738
gRNA_55601	BMgn010756	7.7353
gRNA_10879	BMgn002363	7.7334
gRNA_540	BMgn000120	7.7329
gRNA_61415	BMgn011807	7.7325
gRNA_15494	BMgn003348	7.7309
gRNA_76511	BMgn014561	7.7298
gRNA_34476	BMgn006958	7.7286
gRNA_55425	BMgn010726	7.7285
gRNA_68437	BMgn013084	7.7268
gRNA_51617	BMgn010052	7.7268
gRNA_83773	BMgn015813	7.7173
gRNA_30197	BMgn006178	7.7147
gRNA_11297	BMgn002450	7.7135
gRNA_36568	BMgn007332	7.7113
gRNA_76087	BMgn014483	7.7111
gRNA_11791	BMgn002557	7.7101
gRNA_4142	BMgn000898	7.7066
gRNA_84636	BMgn015963	7.7046
gRNA_71085	BMgn013548	7.7044
gRNA_59622	BMgn011484	7.6961
gRNA_27802	BMgn005744	7.6921
gRNA_76212	BMgn014509	7.6886
gRNA_45780	BMgn008979	7.6879
gRNA_69606	BMgn013289	7.6872
gRNA_55643	BMgn010763	7.6872
gRNA_48554	BMgn009489	7.6863
gRNA_36990	BMgn007415	7.6862
gRNA_7898	BMgn001709	7.6852
gRNA_42704	BMgn008430	7.683
gRNA_39637	BMgn007879	7.6829
gRNA_6457	BMgn001399	7.6815
gRNA_75980	BMgn014463	7.6815
gRNA_18173	BMgn003926	7.6815
gRNA_1511	BMgn000328	7.6797
gRNA_38149	BMgn007613	7.6786
gRNA_69193	BMgn013218	7.6783
gRNA_15847	BMgn003421	7.6773
gRNA_51630	BMgn010054	7.6767
gRNA_74813	BMgn014239	7.6767
gRNA_66211	BMgn012672	7.6755
gRNA_1666	BMgn000359	7.673
gRNA_779	BMgn000174	7.6714
gRNA_20718	BMgn004457	7.6708
gRNA_23125	BMgn004892	7.669
gRNA_40180	BMgn007974	7.6683
gRNA_44841	BMgn008816	7.6675
gRNA_76053	BMgn014477	7.666
gRNA_43011	BMgn008484	7.6647
gRNA_58637	BMgn011307	7.6637
gRNA_32644	BMgn006630	7.6634
gRNA_69091	BMgn013200	7.6588
gRNA_79529	BMgn015089	7.6573
gRNA_71610	BMgn013646	7.6553
gRNA_59766	BMgn011511	7.6517
gRNA_34046	BMgn006880	7.6495
gRNA_46752	BMgn009155	7.6473
gRNA_73135	BMgn013922	7.6468
gRNA_60162	BMgn011584	7.645
gRNA_34316	BMgn006931	7.6441
gRNA_55124	BMgn010673	7.6422
gRNA_21517	BMgn004606	7.6419
gRNA_9195	BMgn001986	7.6419
gRNA_48801	BMgn009532	7.6402
gRNA_19738	BMgn004274	7.636
gRNA_78501	BMgn014913	7.6355
gRNA_43269	BMgn008532	7.6342
gRNA_18122	BMgn003915	7.6334
gRNA_48145	BMgn009416	7.6308
gRNA_8417	BMgn001821	7.6306
gRNA_75702	BMgn014414	7.6288
gRNA_48406	BMgn009462	7.6287
gRNA_17593	BMgn003791	7.6259
gRNA_80583	BMgn015267	7.6224
gRNA_15108	BMgn003267	7.6205
gRNA_50039	BMgn009751	7.6173
gRNA_7072	BMgn001532	7.6172
gRNA_86984	BMgn016369	7.6159
gRNA_23200	BMgn004905	7.6138
gRNA_44362	BMgn008726	7.6136
gRNA_15995	BMgn003451	7.6103
gRNA_32932	BMgn006680	7.6095
gRNA_64516	BMgn012362	7.608
gRNA_6711	BMgn001457	7.608
gRNA_14154	BMgn003058	7.6068
gRNA_74611	BMgn014201	7.6062
gRNA_70092	BMgn013375	7.6058
gRNA_62964	BMgn012082	7.6033
gRNA_5848	BMgn001269	7.6031
gRNA_46043	BMgn009026	7.6024
gRNA_26719	BMgn005547	7.6005
gRNA_68989	BMgn013182	7.5997
gRNA_56648	BMgn010943	7.5996
gRNA_27988	BMgn005776	7.5984
gRNA_52709	BMgn010246	7.5971
gRNA_60112	BMgn011576	7.5942
gRNA_42305	BMgn008361	7.5933
gRNA_11456	BMgn002487	7.5933
gRNA_29959	BMgn006134	7.5918
gRNA_6284	BMgn001363	7.5918
gRNA_24305	BMgn005108	7.5899
gRNA_47613	BMgn009319	7.5895
gRNA_79640	BMgn015108	7.5893
gRNA_16360	BMgn003529	7.5892
gRNA_191	BMgn000045	7.5892
gRNA_2269	BMgn000489	7.5858
gRNA_35980	BMgn007230	7.5851
gRNA_85131	BMgn016049	7.5835
gRNA_11907	BMgn002582	7.5826
gRNA_83725	BMgn015805	7.5817
gRNA_90442	BMgn016972	7.5812
gRNA_56566	BMgn010930	7.5785
gRNA_2379	BMgn000513	7.5781
gRNA_20279	BMgn004379	7.5777
gRNA_55642	BMgn010763	7.5766
gRNA_10866	BMgn002360	7.5764
gRNA_30823	BMgn006293	7.5759
gRNA_65933	BMgn012623	7.5749
gRNA_36580	BMgn007334	7.5712
gRNA_56841	BMgn010975	7.5704
gRNA_69703	BMgn013305	7.5702
gRNA_74048	BMgn014093	7.5699
gRNA_63533	BMgn012182	7.5672
gRNA_85266	BMgn016072	7.567
gRNA_60369	BMgn011620	7.5669
gRNA_89649	BMgn016833	7.5669
gRNA_3770	BMgn000819	7.5666
gRNA_63151	BMgn012117	7.5658
gRNA_52531	BMgn010213	7.5654
gRNA_54037	BMgn010487	7.5631
gRNA_31231	BMgn006367	7.5629
gRNA_11997	BMgn002601	7.559
gRNA_57723	BMgn011136	7.5586
gRNA_74343	BMgn014146	7.5567
gRNA_31851	BMgn006489	7.5558
gRNA_15241	BMgn003294	7.5465
gRNA_7689	BMgn001664	7.5452
gRNA_8245	BMgn001783	7.543
gRNA_28381	BMgn005852	7.5424
gRNA_11433	BMgn002480	7.5416
gRNA_13891	BMgn003001	7.5409
gRNA_43779	BMgn008626	7.5404
gRNA_78864	BMgn014975	7.5394
gRNA_63586	BMgn012192	7.5393
gRNA_52325	BMgn010178	7.539
gRNA_24150	BMgn005076	7.5332
gRNA_10127	BMgn002194	7.5331
gRNA_72457	BMgn013802	7.5289
gRNA_74209	BMgn014122	7.5289
gRNA_29981	BMgn006140	7.526
gRNA_2449	BMgn000528	7.5244
gRNA_4183	BMgn000909	7.5244
gRNA_47453	BMgn009292	7.5232
gRNA_13030	BMgn002818	7.5227
gRNA_947	BMgn000209	7.5223
gRNA_6632	BMgn001437	7.522
gRNA_22708	BMgn004818	7.5209
gRNA_50312	BMgn009801	7.5185
gRNA_11800	BMgn002559	7.5172
gRNA_65828	BMgn012606	7.5168
gRNA_19945	BMgn004315	7.516
gRNA_43841	BMgn008636	7.5155
gRNA_11978	BMgn002597	7.5138
gRNA_92432	BMgn017316	7.512
gRNA_34398	BMgn006945	7.5114
gRNA_53359	BMgn010366	7.511
gRNA_88190	BMgn016578	7.5104
gRNA_93298	BMgn017465	7.5104
gRNA_38447	BMgn007666	7.5085
gRNA_27756	BMgn005737	7.5074
gRNA_27292	BMgn005650	7.507
gRNA_20156	BMgn004356	7.5058
gRNA_54101	BMgn010499	7.5038
gRNA_61944	BMgn011902	7.5033
gRNA_59838	BMgn011526	7.5033
gRNA_29460	BMgn006045	7.5023
gRNA_89698	BMgn016842	7.5008
gRNA_33067	BMgn006706	7.5006
gRNA_68896	BMgn013166	7.5002
gRNA_51131	BMgn009959	7.4999
gRNA_36442	BMgn007309	7.4997
gRNA_59518	BMgn011466	7.4992
gRNA_4034	BMgn000873	7.499
gRNA_45063	BMgn008855	7.4953
gRNA_57619	BMgn011117	7.4952
gRNA_6825	BMgn001481	7.494
gRNA_74257	BMgn014130	7.494
gRNA_13903	BMgn003004	7.4927
gRNA_64478	BMgn012353	7.488
gRNA_55760	BMgn010784	7.488
gRNA_11069	BMgn002401	7.4874
gRNA_1264	BMgn000278	7.4846
gRNA_38287	BMgn007637	7.4845
gRNA_1485	BMgn000323	7.4836
gRNA_12265	BMgn002656	7.4829
gRNA_10308	BMgn002232	7.4809
gRNA_37968	BMgn007583	7.48
gRNA_57243	BMgn011047	7.4787
gRNA_67700	BMgn012946	7.478
gRNA_48440	BMgn009468	7.4768
gRNA_46495	BMgn009111	7.4756
gRNA_59675	BMgn011493	7.474
gRNA_32705	BMgn006640	7.4728
gRNA_60593	BMgn011662	7.4685
gRNA_23476	BMgn004953	7.4677
gRNA_544	BMgn000121	7.4664
gRNA_24959	BMgn005232	7.4656
gRNA_8043	BMgn001739	7.4649
gRNA_34062	BMgn006882	7.4646
gRNA_56836	BMgn010975	7.4628
gRNA_26002	BMgn005416	7.4626
gRNA_54352	BMgn010541	7.4615
gRNA_17876	BMgn003857	7.4597
gRNA_51701	BMgn010068	7.4585
gRNA_53531	BMgn010396	7.4536
gRNA_91676	BMgn017186	7.4535
gRNA_85073	BMgn016039	7.4511
gRNA_43352	BMgn008549	7.4489
gRNA_79399	BMgn015066	7.4489
gRNA_15453	BMgn003339	7.4482
gRNA_65950	BMgn012626	7.4461
gRNA_13516	BMgn002919	7.4432
gRNA_64566	BMgn012370	7.4426
gRNA_83609	BMgn015786	7.4422
gRNA_80645	BMgn015279	7.4373
gRNA_73907	BMgn014067	7.4353
gRNA_56736	BMgn010958	7.4342
gRNA_59398	BMgn011446	7.4341
gRNA_34724	BMgn007000	7.4334
gRNA_89033	BMgn016726	7.4334
gRNA_54042	BMgn010488	7.4331
gRNA_45248	BMgn008887	7.4327
gRNA_78915	BMgn014984	7.4325
gRNA_64692	BMgn012392	7.4321
gRNA_32971	BMgn006687	7.4303
gRNA_68160	BMgn013027	7.4298
gRNA_25787	BMgn005377	7.4272
gRNA_13932	BMgn003009	7.4258
gRNA_14800	BMgn003200	7.4243
gRNA_37957	BMgn007581	7.4226
gRNA_39047	BMgn007774	7.4221
gRNA_63818	BMgn012232	7.4196
gRNA_15944	BMgn003441	7.4194
gRNA_75550	BMgn014385	7.4186
gRNA_86921	BMgn016358	7.4166
gRNA_55320	BMgn010708	7.416
gRNA_23906	BMgn005029	7.4144
gRNA_16130	BMgn003480	7.4136
gRNA_27423	BMgn005674	7.4134
gRNA_50118	BMgn009764	7.4128
gRNA_65946	BMgn012625	7.4123
gRNA_70243	BMgn013400	7.4113
gRNA_34817	BMgn007017	7.4109
gRNA_46156	BMgn009048	7.4103
gRNA_27412	BMgn005672	7.4072
gRNA_47133	BMgn009228	7.4068
gRNA_12325	BMgn002669	7.4048
gRNA_70988	BMgn013532	7.4042
gRNA_50570	BMgn009848	7.4023
gRNA_61404	BMgn011805	7.3991
gRNA_42447	BMgn008384	7.3989
gRNA_60347	BMgn011615	7.3979
gRNA_39587	BMgn007871	7.3964
gRNA_35272	BMgn007098	7.3951
gRNA_4299	BMgn000933	7.3949
gRNA_74571	BMgn014193	7.3921
gRNA_68524	BMgn013100	7.391
gRNA_56228	BMgn010867	7.3873
gRNA_28162	BMgn005811	7.3873
gRNA_41553	BMgn008228	7.3872
gRNA_18348	BMgn003963	7.3848
gRNA_15451	BMgn003338	7.3842
gRNA_23203	BMgn004905	7.3832
gRNA_83205	BMgn015716	7.383
gRNA_46676	BMgn009141	7.3815
gRNA_68761	BMgn013141	7.3811
gRNA_25369	BMgn005301	7.3774
gRNA_56329	BMgn010886	7.377
gRNA_40384	BMgn008011	7.3742
gRNA_83518	BMgn015771	7.3732
gRNA_28033	BMgn005786	7.372
gRNA_79969	BMgn015163	7.3698
gRNA_30746	BMgn006280	7.3687
gRNA_35292	BMgn007101	7.3686
gRNA_57898	BMgn011170	7.3676
gRNA_68623	BMgn013117	7.3671
gRNA_8180	BMgn001770	7.367
gRNA_91562	BMgn017167	7.3654
gRNA_7851	BMgn001699	7.3621
gRNA_41480	BMgn008209	7.3616
gRNA_32765	BMgn006650	7.3601
gRNA_28795	BMgn005928	7.3596
gRNA_4145	BMgn000898	7.3582
gRNA_32762	BMgn006649	7.3572
gRNA_50308	BMgn009800	7.3555
gRNA_14828	BMgn003207	7.3539
gRNA_56337	BMgn010888	7.3526
gRNA_53439	BMgn010379	7.3524
gRNA_43227	BMgn008525	7.3524
gRNA_65231	BMgn012495	7.3517
gRNA_41898	BMgn008288	7.3498
gRNA_35160	BMgn007079	7.3468
gRNA_15896	BMgn003432	7.3466
gRNA_43402	BMgn008558	7.3458
gRNA_18203	BMgn003932	7.3457
gRNA_26170	BMgn005448	7.3456
gRNA_22373	BMgn004760	7.3439
gRNA_90487	BMgn016979	7.3416
gRNA_27470	BMgn005684	7.3403
gRNA_71771	BMgn013678	7.34
gRNA_67182	BMgn012856	7.3374
gRNA_30680	BMgn006268	7.3364
gRNA_31312	BMgn006380	7.3362
gRNA_66787	BMgn012782	7.3329
gRNA_72233	BMgn013762	7.331
gRNA_76744	BMgn014611	7.3309
gRNA_54337	BMgn010538	7.3304
gRNA_61504	BMgn011823	7.3294
gRNA_84579	BMgn015954	7.328
gRNA_78109	BMgn014847	7.3278
gRNA_62915	BMgn012074	7.3272
gRNA_33894	BMgn006854	7.3263
gRNA_84748	BMgn015983	7.3248
gRNA_15581	BMgn003365	7.324
gRNA_54709	BMgn010602	7.3235
gRNA_667	BMgn000151	7.3197
gRNA_74330	BMgn014144	7.3197
gRNA_63429	BMgn012165	7.3197
gRNA_6577	BMgn001425	7.3187
gRNA_72992	BMgn013898	7.3185
gRNA_76535	BMgn014565	7.3184
gRNA_72388	BMgn013790	7.3181
gRNA_53732	BMgn010430	7.3164
gRNA_20694	BMgn004453	7.3137
gRNA_53086	BMgn010317	7.3137
gRNA_33753	BMgn006828	7.3137
gRNA_78205	BMgn014863	7.3132
gRNA_72736	BMgn013854	7.3131
gRNA_72888	BMgn013880	7.3098
gRNA_66255	BMgn012683	7.3093
gRNA_3407	BMgn000738	7.3091
gRNA_55567	BMgn010751	7.3089
gRNA_25295	BMgn005288	7.3076
gRNA_4245	BMgn000922	7.3075
gRNA_19110	BMgn004131	7.3045
gRNA_27371	BMgn005664	7.3042
gRNA_69326	BMgn013241	7.3032
gRNA_26879	BMgn005573	7.2985
gRNA_71982	BMgn013713	7.2967
gRNA_28794	BMgn005928	7.2955
gRNA_62358	BMgn011976	7.2949
gRNA_44309	BMgn008716	7.2947
gRNA_4400	BMgn000955	7.2942
gRNA_64076	BMgn012278	7.293
gRNA_88398	BMgn016614	7.2926
gRNA_42308	BMgn008361	7.2923
gRNA_46888	BMgn009182	7.2919
gRNA_42913	BMgn008467	7.2915
gRNA_93724	BMgn017542	7.2885
gRNA_45389	BMgn008910	7.2876
gRNA_46499	BMgn009112	7.2866
gRNA_71015	BMgn013536	7.2865
gRNA_57456	BMgn011087	7.285
gRNA_36375	BMgn007298	7.2849
gRNA_50032	BMgn009750	7.2826
gRNA_33392	BMgn006763	7.2826
gRNA_93678	BMgn017535	7.2819
gRNA_23725	BMgn004994	7.2811
gRNA_39180	BMgn007796	7.2805
gRNA_75791	BMgn014431	7.2791
gRNA_39604	BMgn007874	7.2764
gRNA_74702	BMgn014218	7.2759
gRNA_61830	BMgn011881	7.2757
gRNA_40006	BMgn007943	7.2755
gRNA_19305	BMgn004176	7.2749
gRNA_88197	BMgn016579	7.2732
gRNA_35621	BMgn007162	7.2711
gRNA_10923	BMgn002372	7.2698
gRNA_22683	BMgn004813	7.2691
gRNA_11763	BMgn002551	7.2686
gRNA_5474	BMgn001189	7.2678
gRNA_57352	BMgn011068	7.2673
gRNA_38986	BMgn007763	7.2635
gRNA_55506	BMgn010740	7.2606
gRNA_17955	BMgn003878	7.2589
gRNA_19409	BMgn004201	7.2589
gRNA_62137	BMgn011938	7.2589
gRNA_29459	BMgn006045	7.2589
gRNA_21757	BMgn004649	7.2586
gRNA_87394	BMgn016441	7.2548
gRNA_5990	BMgn001299	7.2532
gRNA_67588	BMgn012927	7.2531
gRNA_73391	BMgn013972	7.2519
gRNA_12207	BMgn002644	7.2506
gRNA_87089	BMgn016389	7.2496
gRNA_79916	BMgn015154	7.2482
gRNA_21838	BMgn004666	7.2482
gRNA_38699	BMgn007710	7.2481
gRNA_55552	BMgn010748	7.2456
gRNA_85199	BMgn016061	7.2451
gRNA_79593	BMgn015100	7.245
gRNA_30435	BMgn006222	7.2445
gRNA_61119	BMgn011755	7.2411
gRNA_30448	BMgn006224	7.2408
gRNA_43576	BMgn008590	7.2401
gRNA_71065	BMgn013545	7.2401
gRNA_44836	BMgn008815	7.2396
gRNA_82308	BMgn015563	7.2393
gRNA_55388	BMgn010720	7.2393
gRNA_71768	BMgn013676	7.2393
gRNA_9858	BMgn002132	7.2354
gRNA_57378	BMgn011072	7.2347
gRNA_45647	BMgn008954	7.2344
gRNA_56931	BMgn010992	7.2335
gRNA_89942	BMgn016883	7.2326
gRNA_84095	BMgn015869	7.2321
gRNA_61977	BMgn011907	7.2314
gRNA_48152	BMgn009417	7.2314
gRNA_27689	BMgn005724	7.2314
gRNA_93508	BMgn017505	7.23
gRNA_31484	BMgn006415	7.2275
gRNA_37573	BMgn007513	7.2274
gRNA_54498	BMgn010565	7.2265
gRNA_55493	BMgn010738	7.2252
gRNA_77855	BMgn014803	7.2249
gRNA_47025	BMgn009208	7.2236
gRNA_91715	BMgn017193	7.2233
gRNA_81198	BMgn015371	7.222
gRNA_22846	BMgn004843	7.2217
gRNA_18672	BMgn004036	7.2216
gRNA_26702	BMgn005544	7.2215
gRNA_41407	BMgn008195	7.2212
gRNA_52306	BMgn010174	7.2208
gRNA_44206	BMgn008697	7.2206
gRNA_38502	BMgn007676	7.2175
gRNA_25167	BMgn005267	7.2167
gRNA_83856	BMgn015828	7.215
gRNA_53132	BMgn010324	7.2147
gRNA_35288	BMgn007100	7.2117
gRNA_42570	BMgn008406	7.2079
gRNA_7149	BMgn001547	7.2072
gRNA_10966	BMgn002381	7.2054
gRNA_24735	BMgn005188	7.2037
gRNA_54799	BMgn010619	7.2037
gRNA_50344	BMgn009806	7.2037
gRNA_52572	BMgn010221	7.2007
gRNA_32547	BMgn006613	7.1985
gRNA_59238	BMgn011418	7.1969
gRNA_53096	BMgn010318	7.1965
gRNA_16726	BMgn003608	7.1938
gRNA_28918	BMgn005949	7.193
gRNA_8573	BMgn001853	7.1917
gRNA_4257	BMgn000925	7.1905
gRNA_50284	BMgn009795	7.189
gRNA_50594	BMgn009852	7.1886
gRNA_49861	BMgn009721	7.1885
gRNA_53789	BMgn010442	7.1884
gRNA_43824	BMgn008633	7.1883
gRNA_11966	BMgn002594	7.1872
gRNA_60858	BMgn011708	7.1856
gRNA_81392	BMgn015404	7.1849
gRNA_81763	BMgn015469	7.1835
gRNA_60975	BMgn011730	7.1831
gRNA_67525	BMgn012916	7.1781
gRNA_20599	BMgn004435	7.177
gRNA_27953	BMgn005770	7.1766
gRNA_5447	BMgn001183	7.1763
gRNA_15259	BMgn003298	7.175
gRNA_17174	BMgn003704	7.174
gRNA_55908	BMgn010811	7.1733
gRNA_78131	BMgn014851	7.1725
gRNA_37435	BMgn007490	7.172
gRNA_58012	BMgn011193	7.1708
gRNA_37819	BMgn007554	7.1695
gRNA_82489	BMgn015594	7.1694
gRNA_14210	BMgn003070	7.1682
gRNA_17713	BMgn003816	7.1652
gRNA_5780	BMgn001254	7.1638
gRNA_42652	BMgn008421	7.1631
gRNA_29462	BMgn006045	7.1629
gRNA_12522	BMgn002710	7.1622
gRNA_26513	BMgn005508	7.16
gRNA_62202	BMgn011948	7.1594
gRNA_42897	BMgn008464	7.1571
gRNA_32960	BMgn006685	7.157
gRNA_79908	BMgn015153	7.1562
gRNA_50566	BMgn009847	7.1554
gRNA_75969	BMgn014461	7.155
gRNA_34317	BMgn006931	7.1545
gRNA_12206	BMgn002644	7.1544
gRNA_77800	BMgn014794	7.1523
gRNA_22881	BMgn004849	7.1508
gRNA_13681	BMgn002954	7.1505
gRNA_28473	BMgn005869	7.15
gRNA_53212	BMgn010340	7.1493
gRNA_47465	BMgn009294	7.1476
gRNA_31880	BMgn006494	7.1458
gRNA_31451	BMgn006409	7.1457
gRNA_9330	BMgn002016	7.1447
gRNA_64716	BMgn012396	7.144
gRNA_75418	BMgn014363	7.141
gRNA_28960	BMgn005956	7.1404
gRNA_43665	BMgn008606	7.1402
gRNA_53260	BMgn010350	7.1395
gRNA_63690	BMgn012209	7.1372
gRNA_61731	BMgn011864	7.1362
gRNA_64796	BMgn012410	7.1359
gRNA_25496	BMgn005325	7.1358
gRNA_4811	BMgn001043	7.1358
gRNA_40851	BMgn008094	7.1357
gRNA_66675	BMgn012762	7.1348
gRNA_41159	BMgn008149	7.1344
gRNA_62177	BMgn011944	7.134
gRNA_28019	BMgn005782	7.1321
gRNA_60235	BMgn011596	7.1302
gRNA_66825	BMgn012788	7.13
gRNA_26393	BMgn005487	7.1291
gRNA_72516	BMgn013814	7.1289
gRNA_17185	BMgn003706	7.1275
gRNA_76278	BMgn014520	7.1258
gRNA_1644	BMgn000355	7.1255
gRNA_61367	BMgn011799	7.1242
gRNA_81196	BMgn015371	7.123
gRNA_6966	BMgn001509	7.1199
gRNA_39733	BMgn007897	7.119
gRNA_33971	BMgn006867	7.1157
gRNA_82982	BMgn015678	7.1141
gRNA_18503	BMgn003997	7.114
gRNA_68234	BMgn013044	7.1136
gRNA_15620	BMgn003374	7.1135
gRNA_78852	BMgn014972	7.1124
gRNA_27885	BMgn005758	7.111
gRNA_43052	BMgn008494	7.1103
gRNA_18406	BMgn003978	7.1097
gRNA_67613	BMgn012932	7.1058
gRNA_18337	BMgn003961	7.1057
gRNA_85600	BMgn016130	7.1046
gRNA_56326	BMgn010886	7.1041
gRNA_91	BMgn000020	7.1035
gRNA_13355	BMgn002886	7.1034
gRNA_12578	BMgn002722	7.1019
gRNA_31701	BMgn006461	7.1015
gRNA_37790	BMgn007550	7.1014
gRNA_62618	BMgn012022	7.1013
gRNA_26401	BMgn005488	7.101
gRNA_66303	BMgn012691	7.1004
gRNA_56464	BMgn010912	7.0991
gRNA_80857	BMgn015314	7.0989
gRNA_89683	BMgn016839	7.0982
gRNA_61881	BMgn011891	7.0938
gRNA_18441	BMgn003985	7.093
gRNA_13802	BMgn002981	7.0928
gRNA_57888	BMgn011169	7.0896
gRNA_22100	BMgn004711	7.086
gRNA_74325	BMgn014143	7.0856
gRNA_33078	BMgn006708	7.084
gRNA_59893	BMgn011535	7.0836
gRNA_65854	BMgn012610	7.0828
gRNA_17534	BMgn003779	7.0823
gRNA_59578	BMgn011476	7.082
gRNA_62518	BMgn012005	7.0816
gRNA_50610	BMgn009855	7.0815
gRNA_88891	BMgn016701	7.0798
gRNA_45457	BMgn008921	7.0793
gRNA_31668	BMgn006455	7.078
gRNA_79209	BMgn015034	7.077
gRNA_86572	BMgn016298	7.0755
gRNA_45167	BMgn008872	7.0743
gRNA_66169	BMgn012663	7.0721
gRNA_73411	BMgn013975	7.0713
gRNA_57223	BMgn011044	7.0707
gRNA_47898	BMgn009371	7.0691
gRNA_57235	BMgn011046	7.0672
gRNA_7222	BMgn001562	7.0647
gRNA_19165	BMgn004143	7.0645
gRNA_46089	BMgn009035	7.0623
gRNA_11761	BMgn002551	7.0606
gRNA_80729	BMgn015293	7.0599
gRNA_83289	BMgn015731	7.0588
gRNA_31795	BMgn006477	7.0581
gRNA_79905	BMgn015152	7.0552
gRNA_38331	BMgn007645	7.0547
gRNA_56851	BMgn010977	7.0535
gRNA_14441	BMgn003122	7.0533
gRNA_17623	BMgn003798	7.0526
gRNA_20208	BMgn004367	7.0519
gRNA_24457	BMgn005137	7.0501
gRNA_36717	BMgn007363	7.0498
gRNA_20612	BMgn004438	7.0482
gRNA_91344	BMgn017127	7.0464
gRNA_65501	BMgn012542	7.0453
gRNA_40884	BMgn008099	7.0434
gRNA_69277	BMgn013233	7.0434
gRNA_7448	BMgn001615	7.0433
gRNA_67848	BMgn012972	7.0424
gRNA_30582	BMgn006248	7.0408
gRNA_45036	BMgn008850	7.04
gRNA_4770	BMgn001035	7.04
gRNA_70947	BMgn013524	7.0399
gRNA_65734	BMgn012588	7.0382
gRNA_74476	BMgn014175	7.0371
gRNA_71761	BMgn013675	7.0341
gRNA_56125	BMgn010849	7.0335
gRNA_76661	BMgn014595	7.0326
gRNA_52185	BMgn010154	7.0297
gRNA_16259	BMgn003508	7.0291
gRNA_72208	BMgn013758	7.0272
gRNA_52458	BMgn010200	7.025
gRNA_44014	BMgn008665	7.025
gRNA_46373	BMgn009086	7.024
gRNA_42323	BMgn008364	7.0235
gRNA_46098	BMgn009037	7.0223
gRNA_74713	BMgn014220	7.0193
gRNA_53897	BMgn010463	7.019
gRNA_57396	BMgn011075	7.0139
gRNA_41828	BMgn008276	7.0136
gRNA_34972	BMgn007045	7.0123
gRNA_56003	BMgn010828	7.0112
gRNA_28720	BMgn005915	7.0111
gRNA_70604	BMgn013466	7.0064
gRNA_22502	BMgn004782	7.0052
gRNA_4878	BMgn001056	7.0045
gRNA_75417	BMgn014363	7.0035
gRNA_72767	BMgn013859	7.0019
gRNA_80395	BMgn015236	7.0018
gRNA_32222	BMgn006553	6.9999
gRNA_57531	BMgn011099	6.997
gRNA_61966	BMgn011905	6.994
gRNA_6392	BMgn001386	6.9934
gRNA_75938	BMgn014456	6.9911
gRNA_29744	BMgn006094	6.991
gRNA_14717	BMgn003182	6.9888
gRNA_33206	BMgn006731	6.9854
gRNA_13204	BMgn002854	6.9843
gRNA_83745	BMgn015809	6.9843
gRNA_41186	BMgn008154	6.9842
gRNA_12855	BMgn002780	6.9838
gRNA_62602	BMgn012019	6.9837
gRNA_90184	BMgn016925	6.9835
gRNA_32802	BMgn006656	6.9829
gRNA_88904	BMgn016703	6.9804
gRNA_90962	BMgn017061	6.9792
gRNA_21229	BMgn004553	6.979
gRNA_49286	BMgn009616	6.9784
gRNA_803	BMgn000179	6.978
gRNA_44629	BMgn008779	6.9777
gRNA_37357	BMgn007477	6.9771
gRNA_8351	BMgn001806	6.977
gRNA_10023	BMgn002171	6.9761
gRNA_29960	BMgn006134	6.9752
gRNA_37679	BMgn007531	6.9739
gRNA_69731	BMgn013310	6.9738
gRNA_52549	BMgn010216	6.9717
gRNA_18581	BMgn004013	6.9699
gRNA_27368	BMgn005664	6.969
gRNA_91117	BMgn017088	6.968
gRNA_49612	BMgn009676	6.9678
gRNA_21678	BMgn004635	6.9675
gRNA_85129	BMgn016049	6.9673
gRNA_28109	BMgn005800	6.9669
gRNA_30678	BMgn006267	6.9662
gRNA_29790	BMgn006102	6.9651
gRNA_8693	BMgn001878	6.9649
gRNA_22858	BMgn004845	6.9648
gRNA_16374	BMgn003532	6.9638
gRNA_55835	BMgn010797	6.9626
gRNA_65571	BMgn012559	6.9619
gRNA_48459	BMgn009473	6.9613
gRNA_79761	BMgn015128	6.9609
gRNA_57133	BMgn011028	6.9608
gRNA_55006	BMgn010654	6.96
gRNA_32019	BMgn006517	6.9598
gRNA_10254	BMgn002221	6.9578
gRNA_76049	BMgn014476	6.9567
gRNA_71027	BMgn013538	6.9557
gRNA_88730	BMgn016673	6.9552
gRNA_40995	BMgn008120	6.9544
gRNA_89449	BMgn016798	6.9506
gRNA_5091	BMgn001105	6.9505
gRNA_60609	BMgn011665	6.9496
gRNA_11067	BMgn002401	6.9484
gRNA_63647	BMgn012202	6.9463
gRNA_53956	BMgn010474	6.9455
gRNA_64812	BMgn012413	6.9454
gRNA_11370	BMgn002466	6.9451
gRNA_61613	BMgn011843	6.9449
gRNA_76448	BMgn014550	6.9446
gRNA_35888	BMgn007214	6.9444
gRNA_80399	BMgn015237	6.9441
gRNA_64723	BMgn012397	6.9434
gRNA_19006	BMgn004109	6.9426
gRNA_225	BMgn000052	6.9425
gRNA_66315	BMgn012693	6.9419
gRNA_7346	BMgn001591	6.9402
gRNA_30888	BMgn006306	6.9393
[truncated: 92,001 more rows]
