# Supplementary material for: Genome-wide CRISPR screening reveals genes essential for cell viability and resistance to abiotic and biotic stresses in Bombyx mori
Source: HighWire-hosted journal article supplement (doi:10.1101/gr.249045.119), 2020-05-01
Supplement: Supplemental_Table_S5.xlsx.xlsx [file Supplemental_Table_S5.xlsx.xlsx]

## Sheet: Supplemental Table legend
Supplemental_Table_S5. The expression level of essential and growth-restricting genes in BmE and silk gland
Sheet1	Supplemental Table legend
Sheet2	All genes in BmE
Sheet3	Essential genes in BmE
Sheet4	Growth-restricting genes in BmE
Sheet5	All genes in SG
Sheet6	Essential genes in SG
Sheet7	Growth-restricting genes in SG

## Sheet: All genes in BmE
Gene ID	Expression
BMgn001603	385088
BMgn014828	35199.5
BMgn015758	33327.3
BMgn016002	8724.5
BMgn014972	7624.29
BMgn004911	6827.49
BMgn007363	5679.36
BMgn003073	5440.08
BMgn017135	5126.5
BMgn000959	4818.43
BMgn013792	4545.28
BMgn001991	4522.77
BMgn003608	4406.06
BMgn008903	4383.64
BMgn000395	4133.34
BMgn001501	3837.02
BMgn011948	3798.92
BMgn011620	3794.03
BMgn001483	3648.19
BMgn003397	3599.38
BMgn003197	3513.95
BMgn005302	3505.7
BMgn006867	3498.34
BMgn008865	3443.69
BMgn016517	3432.94
BMgn013076	3382.39
BMgn012414	3340.91
BMgn002811	3316.87
BMgn007710	3076.6
BMgn011467	3018.75
BMgn005928	3008.52
BMgn007645	2941.46
BMgn010970	2933.86
BMgn009130	2928.8
BMgn004356	2850.43
BMgn009751	2844.81
BMgn004374	2786.44
BMgn007661	2694.85
BMgn001043	2672.17
BMgn011273	2671.76
BMgn001243	2639.54
BMgn002572	2628.64
BMgn010571	2551.43
BMgn009319	2513.76
BMgn003978	2452.28
BMgn009208	2440.07
BMgn001363	2418.77
BMgn008881	2377.37
BMgn011416	2367.86
BMgn010139	2350.48
BMgn001471	2330.21
BMgn003829	2299.16
BMgn004375	2256.17
BMgn001800	2241.74
BMgn011282	2230.34
BMgn014094	2206.55
BMgn003726	2127.36
BMgn017339	2097.43
BMgn010604	2091.99
BMgn015572	2056.97
BMgn016383	2016.67
BMgn012546	2012.25
BMgn013567	1999.26
BMgn010487	1993.75
BMgn016112	1909.03
BMgn010867	1906.26
BMgn002429	1903.86
BMgn004165	1898.69
BMgn007795	1879.06
BMgn003469	1866.56
BMgn000867	1795.31
BMgn007469	1781.71
BMgn011446	1745.48
BMgn001106	1689.03
BMgn006835	1676.19
BMgn009863	1668.04
BMgn004612	1650.29
BMgn007743	1621.75
BMgn013157	1613.86
BMgn006986	1608.75
BMgn013413	1565.11
BMgn007412	1536.59
BMgn002381	1487.93
BMgn009411	1474.84
BMgn011068	1379.72
BMgn008921	1373.05
BMgn003337	1296.51
BMgn012626	1289.68
BMgn011602	1091.51
BMgn005684	998.106
BMgn004406	940.687
BMgn005871	939.049
BMgn002405	907.891
BMgn000201	902.307
BMgn009763	899.056
BMgn016215	880.861
BMgn000971	874.47
BMgn006463	868.567
BMgn003923	838.273
BMgn001549	836.952
BMgn006414	835.778
BMgn006426	825.499
BMgn002644	801.642
BMgn016162	759.243
BMgn001415	734.61
BMgn001627	729.37
BMgn011272	720.898
BMgn004613	690.123
BMgn009698	632.193
BMgn006141	616.404
BMgn006794	609.106
BMgn002186	603.298
BMgn015225	596.611
BMgn007477	594.057
BMgn000526	588.248
BMgn002309	543.451
BMgn013448	541.102
BMgn004515	540.644
BMgn006966	537.233
BMgn002164	522.916
BMgn009365	502.615
BMgn005577	498.642
BMgn006751	497.877
BMgn007701	492.914
BMgn001318	491.292
BMgn003587	490.489
BMgn011701	487.869
BMgn014136	487.816
BMgn000367	487.272
BMgn009684	484.264
BMgn013778	479.761
BMgn000475	476.031
BMgn015360	470.713
BMgn002981	470.222
BMgn007684	458.754
BMgn008302	455.167
BMgn004657	454.149
BMgn005413	453.332
BMgn011253	452.582
BMgn014686	445.73
BMgn004614	443.035
BMgn003898	437.817
BMgn009516	431.576
BMgn005455	430.705
BMgn011438	428.21
BMgn006518	425.904
BMgn006132	423.815
BMgn001828	413.651
BMgn004191	412.047
BMgn002640	404.681
BMgn009956	403.028
BMgn013545	400.844
BMgn004605	399.512
BMgn009021	382.415
BMgn003186	379.566
BMgn001307	373.579
BMgn010588	373.001
BMgn003475	372.928
BMgn011521	370.224
BMgn013464	370.119
BMgn011342	367.695
BMgn004376	367.291
BMgn005550	361.221
BMgn011844	355.595
BMgn006704	353.657
BMgn006415	352.805
BMgn007950	350.949
BMgn010751	346.217
BMgn009107	340.978
BMgn004454	333.82
BMgn007349	329.455
BMgn011754	329.115
BMgn008780	329.06
BMgn004331	328.116
BMgn011504	327.304
BMgn001167	323.433
BMgn015733	317.502
BMgn007889	313.34
BMgn008670	313.207
BMgn012687	311.512
BMgn003412	310.578
BMgn006412	310.288
BMgn016800	309.942
BMgn016515	308.443
BMgn016490	308.275
BMgn015637	302.17
BMgn004577	298.914
BMgn012356	298.381
BMgn005289	297.728
BMgn006376	297.52
BMgn010906	296.954
BMgn002915	296.124
BMgn000231	295.083
BMgn006758	294.521
BMgn006296	291.657
BMgn009045	290.469
BMgn003335	289.052
BMgn007904	289.023
BMgn005648	286.066
BMgn010365	280.2
BMgn014796	278.335
BMgn006543	275.405
BMgn000918	274.755
BMgn005576	274.227
BMgn003669	272.019
BMgn012674	271.726
BMgn002505	269.816
BMgn005560	266.675
BMgn003221	265.46
BMgn011746	265.151
BMgn011581	263.998
BMgn004908	262.531
BMgn015592	262.401
BMgn007114	260.911
BMgn005994	259.319
BMgn012753	258.602
BMgn011877	256.085
BMgn013131	255.983
BMgn009987	254.949
BMgn002114	254.749
BMgn010419	254.108
BMgn001183	253.982
BMgn002620	253.116
BMgn000759	251.807
BMgn008663	249.718
BMgn008768	249.125
BMgn016498	246.693
BMgn010673	244.653
BMgn011920	243.967
BMgn011803	242.375
BMgn017330	241.313
BMgn007453	239.521
BMgn006256	238.849
BMgn003828	238.532
BMgn003361	236.93
BMgn001395	236.55
BMgn003009	236.32
BMgn010102	233.735
BMgn011507	233.397
BMgn010595	233.322
BMgn007702	231.837
BMgn004540	230.292
BMgn007426	229.62
BMgn008955	228.142
BMgn012153	226.925
BMgn016878	226.904
BMgn017077	226.655
BMgn010030	226.082
BMgn003309	225.611
BMgn004377	225.478
BMgn016697	224.66
BMgn015016	223.956
BMgn011667	222.806
BMgn011819	221.9
BMgn003203	221.534
BMgn011589	221.339
BMgn002015	217.924
BMgn005299	216.933
BMgn012690	216.113
BMgn010475	215.006
BMgn011936	214.607
BMgn007895	213.794
BMgn001853	213.689
BMgn006514	212.701
BMgn013934	212.544
BMgn000444	212.431
BMgn009479	208.575
BMgn012515	208.369
BMgn004661	207.624
BMgn016641	206.756
BMgn006828	204.938
BMgn017124	203.811
BMgn010541	203.338
BMgn006158	202.91
BMgn014105	202.84
BMgn001218	202.245
BMgn003584	200.756
BMgn012334	200.618
BMgn003544	196.722
BMgn016482	195.708
BMgn015413	195.482
BMgn017088	194.422
BMgn007268	193.195
BMgn015826	192.928
BMgn013100	192.103
BMgn012870	191.904
BMgn005425	190.224
BMgn007332	188.293
BMgn017209	188.153
BMgn009249	187.872
BMgn013960	187.541
BMgn011824	187.312
BMgn013510	186.708
BMgn006263	186.133
BMgn015837	185.062
BMgn011658	184.221
BMgn005559	182.851
BMgn000672	181.343
BMgn001119	180.96
BMgn011337	180.914
BMgn016587	180.244
BMgn013965	179.375
BMgn004000	179.362
BMgn011371	179.198
BMgn002493	178.992
BMgn012762	178.506
BMgn002004	177.183
BMgn003541	177.117
BMgn001060	176.994
BMgn003758	176.808
BMgn012328	176.396
BMgn000947	175.798
BMgn001266	174.665
BMgn000910	174.352
BMgn003165	173.83
BMgn010944	173.655
BMgn003398	173.344
BMgn011096	172.117
BMgn014177	172.082
BMgn016814	172.061
BMgn015014	170.473
BMgn006351	170.121
BMgn004164	167.478
BMgn001490	167.091
BMgn011783	166.907
BMgn007841	166.355
BMgn009052	166.091
BMgn015153	166.074
BMgn004059	165.084
BMgn017044	164.782
BMgn005628	163.949
BMgn010423	163.442
BMgn014862	163.421
BMgn012373	161.772
BMgn015414	161.416
BMgn002619	161.328
BMgn011499	161.306
BMgn010684	160.903
BMgn012961	160.624
BMgn002049	160.43
BMgn010959	159.789
BMgn009101	158.626
BMgn006588	158.36
BMgn006136	157.584
BMgn003671	157.045
BMgn001605	156.793
BMgn015749	156.791
BMgn009701	156.42
BMgn012709	156.019
BMgn011092	155.54
BMgn000703	154.838
BMgn007397	154.34
BMgn016390	154.038
BMgn013839	153.451
BMgn008699	153.434
BMgn000990	152.934
BMgn000528	152.765
BMgn014005	152.676
BMgn004655	152.591
BMgn014175	151.64
BMgn004822	151.621
BMgn016731	151.483
BMgn015741	151.48
BMgn007881	151.171
BMgn007043	150.776
BMgn002618	150.237
BMgn017162	149.79
BMgn015104	149.786
BMgn006936	149.602
BMgn007495	148.863
BMgn002018	148.501
BMgn010129	148.218
BMgn010657	148.169
BMgn011618	147.605
BMgn007490	147.15
BMgn008682	145.939
BMgn009760	145.666
BMgn003178	145.277
BMgn016811	144.938
BMgn003493	143.797
BMgn005493	143.704
BMgn001302	143.192
BMgn015447	143.074
BMgn004038	142.574
BMgn015224	142.446
BMgn004265	142.022
BMgn013898	141.412
BMgn009841	141.354
BMgn009132	141.234
BMgn002455	141.195
BMgn004231	140.776
BMgn002183	140.673
BMgn013801	140.65
BMgn004009	140.012
BMgn012243	140.006
BMgn005564	139.73
BMgn001107	139.513
BMgn001211	139.288
BMgn004974	138.787
BMgn013451	138.542
BMgn012032	138.172
BMgn001096	137.31
BMgn004824	137.204
BMgn010262	137.179
BMgn006944	137.094
BMgn015933	137.062
BMgn005068	136.834
BMgn010130	136.752
BMgn017040	136.37
BMgn014642	136.123
BMgn006154	135.807
BMgn011061	135.585
BMgn001097	135.068
BMgn013536	134.945
BMgn014269	134.152
BMgn011344	133.194
BMgn009571	133.041
BMgn006859	132.495
BMgn004847	132.09
BMgn005635	131.362
BMgn000943	131.18
BMgn013116	131.145
BMgn015631	130.905
BMgn016787	130.885
BMgn000714	130.799
BMgn002570	130.787
BMgn000218	130.076
BMgn002582	130.014
BMgn003637	129.929
BMgn003014	129.859
BMgn007594	129.806
BMgn015000	129.437
BMgn010246	129.397
BMgn007343	129.352
BMgn016634	129.225
BMgn009685	128.673
BMgn012710	128.477
BMgn006507	127.996
BMgn011668	127.974
BMgn011696	127.095
BMgn006866	127.001
BMgn005793	126.864
BMgn006583	126.379
BMgn010337	126.378
BMgn004037	126.054
BMgn015997	124.918
BMgn006940	124.529
BMgn004932	124.454
BMgn012772	124.353
BMgn004162	123.595
BMgn012670	123.538
BMgn015798	123.494
BMgn008493	122.858
BMgn003583	122.851
BMgn015541	122.815
BMgn000292	122.546
BMgn005012	121.835
BMgn012126	121.785
BMgn006456	121.583
BMgn005315	121.495
BMgn009010	120.821
BMgn012860	120.61
BMgn012857	120.454
BMgn005347	119.683
BMgn006323	119.627
BMgn011334	119.197
BMgn011619	119.102
BMgn007712	118.187
BMgn015124	117.579
BMgn015293	117.197
BMgn001186	117.189
BMgn009955	117.102
BMgn015912	116.927
BMgn017173	116.924
BMgn002635	116.899
BMgn008203	116.787
BMgn009704	116.613
BMgn015846	116.513
BMgn005889	116.455
BMgn002569	115.676
BMgn010566	115.644
BMgn009830	115.426
BMgn007068	115.289
BMgn003697	115.279
BMgn003004	114.734
BMgn004987	114.636
BMgn017153	114.618
BMgn002024	114.334
BMgn000381	114.137
BMgn005392	113.825
BMgn000474	113.797
BMgn008864	113.365
BMgn007410	113.266
BMgn005267	113.218
BMgn006863	112.964
BMgn015284	112.533
BMgn003457	112.253
BMgn006497	112.237
BMgn000819	112.063
BMgn003028	111.918
BMgn009372	111.772
BMgn009103	111.685
BMgn008312	111.587
BMgn010671	111.085
BMgn016049	110.989
BMgn009795	110.667
BMgn007084	110.371
BMgn000923	110.165
BMgn004302	109.931
BMgn001966	109.888
BMgn002416	109.753
BMgn004858	109.623
BMgn006167	109.397
BMgn010461	109.293
BMgn002814	109.254
BMgn012437	108.955
BMgn006344	108.885
BMgn001613	108.503
BMgn011237	108.355
BMgn011973	108.281
BMgn015481	108.252
BMgn002551	108.157
BMgn000977	107.877
BMgn008011	107.652
BMgn012004	107.185
BMgn001252	107.01
BMgn007418	106.963
BMgn007267	106.81
BMgn002894	106.633
BMgn012555	106.582
BMgn005169	106.467
BMgn008199	106.19
BMgn003704	106.069
BMgn003985	106.056
BMgn000446	105.734
BMgn009706	105.562
BMgn006193	105.552
BMgn004666	105.549
BMgn000232	105.302
BMgn012675	105.205
BMgn014122	105.142
BMgn012152	105.051
BMgn006260	105.003
BMgn008425	104.828
BMgn016312	104.711
BMgn012981	104.636
BMgn008728	104.436
BMgn015520	104.418
BMgn001165	103.524
BMgn003070	103.197
BMgn003520	103.144
BMgn012128	102.992
BMgn011014	102.204
BMgn017120	102.18
BMgn009572	102.028
BMgn010739	101.578
BMgn006536	101.487
BMgn013449	101.463
BMgn002713	101.421
BMgn006615	101.373
BMgn005205	101.3
BMgn000944	101.236
BMgn004983	101.17
BMgn008006	100.937
BMgn016933	100.665
BMgn014849	100.336
BMgn015679	100.213
BMgn016812	100.051
BMgn015609	99.948
BMgn009049	99.2895
BMgn010666	99.0699
BMgn000229	99.0308
BMgn008887	98.9437
BMgn003196	98.5314
BMgn004250	98.2478
BMgn007011	97.6452
BMgn009731	97.5577
BMgn006840	97.41
BMgn006357	97.3335
BMgn009645	97.3149
BMgn004419	97.3126
BMgn010845	97.1148
BMgn004891	97.1048
BMgn015453	97.0439
BMgn005461	96.9803
BMgn013923	96.9462
BMgn013566	96.8001
BMgn006590	96.6131
BMgn002639	96.3906
BMgn013070	95.7397
BMgn016674	95.4857
BMgn000479	95.4288
BMgn004175	95.3321
BMgn003112	95.3207
BMgn011999	95.2653
BMgn001381	95.1185
BMgn013612	95.0484
BMgn001593	94.9509
BMgn001166	94.6927
BMgn010905	94.5522
BMgn002013	94.3049
BMgn011427	94.2274
BMgn010489	94.0509
BMgn006809	93.9639
BMgn001123	93.8369
BMgn005498	93.5183
BMgn009845	93.2848
BMgn012904	93.1246
BMgn009361	92.8241
BMgn004952	92.6649
BMgn013260	92.6536
BMgn016231	92.5708
BMgn009156	92.5474
BMgn011651	92.443
BMgn011672	92.4336
BMgn016782	92.4232
BMgn002543	92.4106
BMgn001170	92.3249
BMgn009992	92.2759
BMgn001437	92.0601
BMgn016391	92.0583
BMgn008688	91.903
BMgn001327	91.7632
BMgn012537	91.604
BMgn010723	91.5486
BMgn013511	91.427
BMgn004994	91.3345
BMgn002711	91.2913
BMgn003339	91.2696
BMgn001132	91.1969
BMgn000129	91.1519
BMgn006022	91.0136
BMgn013096	90.9209
BMgn011788	90.9015
BMgn006591	90.8207
BMgn001790	90.709
BMgn010577	90.5853
BMgn012298	90.4365
BMgn010113	90.0985
BMgn016820	90.0955
BMgn005328	90.0917
BMgn009726	89.9599
BMgn009794	89.9497
BMgn008846	89.5562
BMgn006531	89.5451
BMgn005384	89.4704
BMgn001637	89.0717
BMgn006693	89.0192
BMgn009322	88.8282
BMgn007662	88.6794
BMgn001044	88.6764
BMgn002383	88.5501
BMgn011019	88.3471
BMgn013614	88.2925
BMgn004701	87.9799
BMgn008337	87.9494
BMgn015329	87.9424
BMgn010655	87.8393
BMgn005040	87.683
BMgn000679	87.5583
BMgn008327	87.532
BMgn006523	87.2895
BMgn003356	87.2556
BMgn003428	87.1721
BMgn000469	87.0915
BMgn004980	86.995
BMgn009802	86.9819
BMgn012323	86.9801
BMgn004688	86.8508
BMgn005115	86.6592
BMgn007681	86.6145
BMgn013785	86.5253
BMgn002461	86.5009
BMgn003327	86.4753
BMgn004789	86.4573
BMgn012954	86.4048
BMgn008021	86.4004
BMgn012045	86.3386
BMgn010527	86.318
BMgn006995	86.2823
BMgn011501	86.2579
BMgn000311	85.8965
BMgn006907	85.8768
BMgn005511	85.6892
BMgn005418	85.5073
BMgn003725	85.2521
BMgn004336	85.1835
BMgn005769	85.1274
BMgn013680	84.8974
BMgn004442	84.7708
BMgn003972	84.7176
BMgn012952	84.5992
BMgn006802	84.5554
BMgn009650	84.4949
BMgn008532	84.417
BMgn006889	84.4068
BMgn015850	84.272
BMgn010644	84.1518
BMgn012541	84.1363
BMgn000622	84.0768
BMgn002779	84.0447
BMgn006192	83.924
BMgn016259	83.8232
BMgn000926	83.7977
BMgn007087	83.6963
BMgn006360	83.5811
BMgn012192	83.1531
BMgn002675	83.1461
BMgn003991	82.7268
BMgn005270	82.6346
BMgn002953	82.543
BMgn005409	82.5313
BMgn001459	82.3825
BMgn003347	82.1881
BMgn000286	82.0468
BMgn016804	82.0251
BMgn016990	81.9949
BMgn001232	81.8042
BMgn009674	81.7573
BMgn016094	81.7356
BMgn007500	81.7146
BMgn008292	81.6788
BMgn016673	81.6206
BMgn015429	81.494
BMgn010668	81.2766
BMgn015756	81.2334
BMgn010355	81.2047
BMgn000188	81.18
BMgn012335	81.0332
BMgn011428	80.9979
BMgn011577	80.9525
BMgn003977	80.763
BMgn016150	80.6274
BMgn001175	80.5684
BMgn009755	80.5525
BMgn012689	80.4829
BMgn004573	80.4674
BMgn011870	80.3537
BMgn013791	80.3252
BMgn003702	80.2561
BMgn007818	79.8749
BMgn008992	79.7628
BMgn007428	79.6497
BMgn012029	79.649
BMgn014921	79.5158
BMgn003420	79.4269
BMgn013508	79.3765
BMgn006709	79.2431
BMgn013498	79.1804
BMgn006945	79.1468
BMgn006841	79.0789
BMgn014851	79.0586
BMgn010520	79.056
BMgn012774	78.9926
BMgn004782	78.9125
BMgn001644	78.7231
BMgn006151	78.5563
BMgn010199	78.3067
BMgn010925	78.274
BMgn009012	78.1612
BMgn004126	78.1356
BMgn005499	78.1314
BMgn001206	78.1188
BMgn003362	77.7879
BMgn006825	77.571
BMgn010839	77.5696
BMgn002792	77.3349
BMgn003643	77.2907
BMgn006265	77.2648
BMgn003311	77.2153
BMgn001482	77.0961
BMgn013328	76.7834
BMgn006905	76.7517
BMgn007720	76.6247
BMgn006257	76.3877
BMgn015820	76.3679
BMgn013620	76.353
BMgn017207	76.3217
BMgn011710	76.2035
BMgn012079	76.1577
BMgn009041	76.1334
BMgn003785	76.0719
BMgn004013	76.0367
BMgn003422	76.0058
BMgn010282	75.8952
BMgn017269	75.8452
BMgn003459	75.8243
BMgn002115	75.7172
BMgn015336	75.6726
BMgn011542	75.6176
BMgn012203	75.4638
BMgn005130	75.3773
BMgn013133	75.1706
BMgn006861	75.1548
BMgn013678	75.1474
BMgn004091	74.9071
BMgn007524	74.8604
BMgn016614	74.8072
BMgn007482	74.7893
BMgn006269	74.7873
BMgn001208	74.7753
BMgn000804	74.7582
BMgn001262	74.7302
BMgn000361	74.5817
BMgn006822	74.3986
BMgn007694	74.3746
BMgn013972	74.3126
BMgn012224	74.2937
BMgn003788	74.2557
BMgn007032	74.2441
BMgn015001	74.1742
BMgn005116	74.0569
BMgn000300	74.0336
BMgn001460	73.7731
BMgn014133	73.7713
BMgn005372	73.6863
BMgn000903	73.428
BMgn006653	73.3233
BMgn011364	73.2505
BMgn002209	73.144
BMgn002478	73.0694
BMgn002215	73.0202
BMgn011386	72.9767
BMgn004695	72.9688
BMgn003840	72.9437
BMgn009338	72.9217
BMgn007297	72.8144
BMgn001236	72.7481
BMgn002428	72.7449
BMgn007877	72.7063
BMgn015996	72.6149
BMgn012485	72.4581
BMgn016088	72.4497
BMgn011151	72.295
BMgn012718	72.2823
BMgn011510	72.2531
BMgn007386	72.226
BMgn001411	72.0556
BMgn001189	72.0329
BMgn007263	71.9757
BMgn004267	71.9205
BMgn000958	71.9124
BMgn002967	71.8649
BMgn008139	71.8166
BMgn002355	71.7698
BMgn008422	71.7575
BMgn008542	71.7528
BMgn017026	71.7525
BMgn010150	71.7509
BMgn000414	71.5574
BMgn011502	71.5091
BMgn000175	71.4162
BMgn005381	71.4043
BMgn013784	71.3893
BMgn002149	71.3465
BMgn011674	71.127
BMgn002241	71.0489
BMgn000627	71.0371
BMgn005329	71.0228
BMgn003042	70.8961
BMgn011009	70.8717
BMgn009374	70.6358
BMgn010928	70.6325
BMgn001829	70.5865
BMgn014720	70.5682
BMgn016396	70.3785
BMgn009412	70.2744
BMgn009880	70.1999
BMgn008286	70.0706
BMgn008554	70.0469
BMgn011426	70.0395
BMgn007082	69.9685
BMgn003652	69.9609
BMgn014093	69.9419
BMgn011039	69.9189
BMgn002610	69.87
BMgn007642	69.8365
BMgn010794	69.8183
BMgn003399	69.7149
BMgn012093	69.7003
BMgn000694	69.5317
BMgn012673	69.4845
BMgn007287	69.3283
BMgn000107	69.3242
BMgn013963	69.3092
BMgn012966	69.2694
BMgn003462	69.2035
BMgn001474	69.0845
BMgn007512	69.0099
BMgn015514	68.9453
BMgn014892	68.8307
BMgn013201	68.815
BMgn002648	68.7297
BMgn002152	68.6559
BMgn016060	68.6186
BMgn003471	68.5268
BMgn005011	68.5265
BMgn004196	68.4651
BMgn007852	68.3988
BMgn009234	68.3835
BMgn010729	68.3683
BMgn011654	68.288
BMgn007258	68.2652
BMgn004977	68.2175
BMgn012012	68.1567
BMgn014271	68.1245
BMgn002470	68.1094
BMgn007326	68.0353
BMgn001209	68.0254
BMgn000064	68.0216
BMgn007299	68.0147
BMgn006378	67.9906
BMgn012072	67.9751
BMgn002773	67.9578
BMgn004626	67.9031
BMgn007460	67.8867
BMgn004834	67.8742
BMgn016516	67.8517
BMgn017312	67.6169
BMgn013514	67.6141
BMgn007892	67.5999
BMgn000976	67.5588
BMgn000995	67.3132
BMgn012851	67.3126
BMgn014403	67.1792
BMgn004112	67.0538
BMgn015807	67.0039
BMgn015699	67.0006
BMgn013082	66.9656
BMgn003974	66.7357
BMgn002356	66.639
BMgn005129	66.3861
BMgn007728	66.3573
BMgn002690	66.2814
BMgn006085	66.2357
BMgn012703	66.2076
BMgn013805	65.969
BMgn008590	65.9304
BMgn009816	65.9282
BMgn014121	65.9008
BMgn013777	65.8835
BMgn014639	65.8649
BMgn000312	65.8533
BMgn000897	65.7935
BMgn004919	65.7022
BMgn010222	65.6548
BMgn010930	65.6302
BMgn013959	65.607
BMgn005815	65.421
BMgn009770	65.088
BMgn004993	65.0006
BMgn012082	64.8312
BMgn002346	64.7797
BMgn003212	64.7688
BMgn015431	64.7053
BMgn005439	64.7033
BMgn011779	64.6954
BMgn001805	64.5766
BMgn002988	64.4777
BMgn004449	64.423
BMgn002987	64.3783
BMgn013366	64.3634
BMgn004827	64.3278
BMgn006931	64.3201
BMgn012878	64.2852
BMgn001234	64.1458
BMgn006425	64.1037
BMgn000122	64.0741
BMgn001943	64.0353
BMgn006365	63.9968
BMgn015643	63.9575
BMgn005434	63.8842
BMgn014563	63.8402
BMgn001928	63.8315
BMgn011902	63.8258
BMgn002906	63.8098
BMgn014874	63.7513
BMgn007405	63.6541
BMgn008619	63.6233
BMgn011867	63.6132
BMgn007875	63.5713
BMgn016246	63.4268
BMgn011584	63.4224
BMgn004958	63.3233
BMgn005853	63.2806
BMgn002880	63.2663
BMgn004541	63.1806
BMgn005637	63.0929
BMgn015294	63.0456
BMgn012568	62.9816
BMgn005466	62.9641
BMgn008084	62.8951
BMgn005590	62.8839
BMgn000974	62.8579
BMgn012669	62.8218
BMgn005465	62.673
BMgn005475	62.6543
BMgn006735	62.6119
BMgn005780	62.6058
BMgn008516	62.4579
BMgn016595	62.4537
BMgn015882	62.4445
BMgn004838	62.4052
BMgn013806	62.2837
BMgn001929	62.2506
BMgn012559	62.2326
BMgn010538	62.1007
BMgn000316	62.0889
BMgn015662	62.0598
BMgn001130	62.0032
BMgn015684	61.9771
BMgn016342	61.9736
BMgn006898	61.9032
BMgn002783	61.85
BMgn010435	61.786
BMgn011659	61.5389
BMgn006161	61.5156
BMgn007509	61.4766
BMgn016085	61.4735
BMgn007868	61.4489
BMgn010635	61.4244
BMgn004909	61.4083
BMgn008501	61.4003
BMgn010926	61.3103
BMgn000743	61.1815
BMgn011008	61.1086
BMgn000664	61.0375
BMgn000222	61.0116
BMgn001735	60.9964
BMgn010407	60.9074
BMgn001558	60.9004
BMgn003116	60.8422
BMgn009332	60.7928
BMgn000683	60.7606
BMgn013634	60.6506
BMgn004020	60.5884
BMgn015149	60.5776
BMgn007408	60.5506
BMgn009467	60.5141
BMgn004024	60.4618
BMgn010952	60.4529
BMgn003586	60.4387
BMgn008036	60.412
BMgn009796	60.3116
BMgn008668	60.2531
BMgn016211	60.2436
BMgn007452	60.1699
BMgn006957	60.112
BMgn005438	59.9064
BMgn002592	59.8377
BMgn007436	59.8268
BMgn014624	59.8193
BMgn002605	59.7531
BMgn009329	59.7307
BMgn010016	59.6168
BMgn012309	59.566
BMgn010449	59.5139
BMgn016971	59.5106
BMgn006824	59.4975
BMgn001174	59.4936
BMgn008854	59.4023
BMgn015020	59.3662
BMgn010068	59.3032
BMgn012329	59.2794
BMgn002439	59.2753
BMgn012159	59.2719
BMgn011606	59.1868
BMgn007861	59.1864
BMgn015518	59.1825
BMgn013072	59.1799
BMgn012448	59.1578
BMgn015350	59.0978
BMgn007079	59.0656
BMgn000648	58.9775
BMgn007723	58.9499
BMgn002323	58.949
BMgn000412	58.8059
BMgn002929	58.8048
BMgn002677	58.8036
BMgn000980	58.7972
BMgn002273	58.7798
BMgn000425	58.7742
BMgn001136	58.7124
BMgn001195	58.695
BMgn004972	58.6691
BMgn004163	58.6027
BMgn003656	58.5533
BMgn005519	58.4375
BMgn000186	58.3873
BMgn013025	58.3231
BMgn003238	58.2786
BMgn011429	58.2525
BMgn004892	58.2326
BMgn005656	58.2236
BMgn011770	58.1435
BMgn006374	58.0051
BMgn006878	58.0018
BMgn007586	57.9955
BMgn017075	57.9476
BMgn006243	57.908
BMgn013364	57.86
BMgn002462	57.8338
BMgn015879	57.7993
BMgn006196	57.7894
BMgn011070	57.7701
BMgn012182	57.7422
BMgn012702	57.6157
BMgn006209	57.5996
BMgn012030	57.5763
BMgn004315	57.5072
BMgn012295	57.2881
BMgn007583	57.2677
BMgn000955	57.1368
BMgn009895	57.1157
BMgn010351	56.9346
BMgn014884	56.9192
BMgn015821	56.9181
BMgn016998	56.9147
BMgn012671	56.8846
BMgn012719	56.8765
BMgn009419	56.8051
BMgn011323	56.7501
BMgn006752	56.7413
BMgn011540	56.7287
BMgn010325	56.684
BMgn004852	56.6326
BMgn008494	56.6254
BMgn004743	56.5214
BMgn011306	56.5119
BMgn009348	56.4995
BMgn001808	56.483
BMgn005486	56.4694
BMgn002971	56.3382
BMgn010620	56.3017
BMgn014804	56.2805
BMgn009817	56.2433
BMgn009639	56.2072
BMgn008894	56.2035
BMgn008291	56.1599
BMgn006574	56.1206
BMgn006941	56.0943
BMgn003466	55.9537
BMgn009209	55.8798
BMgn007108	55.7585
BMgn012754	55.7223
BMgn009399	55.7161
BMgn006627	55.6426
BMgn016721	55.6368
BMgn000099	55.6173
BMgn006789	55.6005
BMgn006920	55.589
BMgn008505	55.5388
BMgn010956	55.4815
BMgn000155	55.4751
BMgn004439	55.4476
BMgn001270	55.4468
BMgn011087	55.4458
BMgn006508	55.4163
BMgn007000	55.3907
BMgn006795	55.3552
BMgn009118	55.3545
BMgn003606	55.3306
BMgn007640	55.3299
BMgn002310	55.1958
BMgn000243	55.194
BMgn010120	55.1589
BMgn000244	55.0821
BMgn016160	55.0557
BMgn012428	55.0383
BMgn016074	55.0122
BMgn016148	54.9568
BMgn009934	54.9147
BMgn011479	54.9116
BMgn010955	54.8883
BMgn016774	54.779
BMgn010943	54.7652
BMgn010653	54.7448
BMgn012115	54.7032
BMgn006872	54.6197
BMgn011987	54.6135
BMgn002261	54.5264
BMgn016306	54.4483
BMgn003202	54.4459
BMgn012873	54.4321
BMgn003767	54.3896
BMgn006603	54.3819
BMgn012069	54.2392
BMgn011524	54.1782
BMgn000970	54.1422
BMgn006401	54.0957
BMgn015747	54.06
BMgn001979	54.0475
BMgn014101	54.0109
BMgn001303	54.0028
BMgn001842	54.0028
BMgn012686	54.0002
BMgn014357	53.9128
BMgn016661	53.9124
BMgn009805	53.897
BMgn009671	53.889
BMgn000293	53.8813
BMgn014985	53.8772
BMgn005174	53.8768
BMgn011593	53.8251
BMgn010593	53.708
BMgn002359	53.657
BMgn003699	53.6533
BMgn012047	53.6475
BMgn005251	53.4874
BMgn015229	53.4794
BMgn005503	53.4738
BMgn006848	53.4585
BMgn001464	53.4338
BMgn006832	53.431
BMgn001182	53.4037
BMgn002661	53.3758
BMgn012164	53.2799
BMgn001787	53.2642
BMgn004592	53.2591
BMgn016225	53.2478
BMgn012118	53.2476
BMgn006805	53.1672
BMgn003187	53.1359
BMgn005535	53.1243
BMgn001645	53.0897
BMgn012075	53.0485
BMgn003155	53.0311
BMgn015008	52.9791
BMgn007109	52.9555
BMgn007530	52.9134
BMgn014007	52.864
BMgn005544	52.8441
BMgn012330	52.8142
BMgn006865	52.8055
BMgn016645	52.7282
BMgn009999	52.6944
BMgn007942	52.6933
BMgn006477	52.6884
BMgn009637	52.6534
BMgn003421	52.6295
BMgn010658	52.611
BMgn005389	52.5604
BMgn001370	52.5138
BMgn008306	52.506
BMgn002674	52.4879
BMgn012010	52.4256
BMgn006405	52.3803
BMgn013021	52.3674
BMgn011599	52.3181
BMgn015680	52.3052
BMgn006754	52.1861
BMgn008595	52.0999
BMgn005310	52.0712
BMgn011782	52.06
BMgn000452	51.9603
BMgn013996	51.9591
BMgn009814	51.9484
BMgn015135	51.9416
BMgn006063	51.9204
BMgn001582	51.8951
BMgn005650	51.8757
BMgn004438	51.8583
BMgn007703	51.7167
BMgn003181	51.7131
BMgn003746	51.7076
BMgn000233	51.702
BMgn010245	51.6992
BMgn015972	51.6847
BMgn004210	51.6837
BMgn001035	51.6686
BMgn001168	51.6213
BMgn003089	51.5339
BMgn004010	51.4869
BMgn009131	51.3821
BMgn008531	51.3126
BMgn003596	51.2215
BMgn000559	51.209
BMgn002203	51.2063
BMgn011062	51.1994
BMgn007685	51.1586
BMgn004992	51.1513
BMgn006464	51.1244
BMgn016141	51.1225
BMgn005411	51.1202
BMgn009699	51.0662
BMgn015635	51.0526
BMgn007876	50.9906
BMgn012081	50.9462
BMgn016042	50.9459
BMgn009983	50.9284
BMgn001495	50.875
BMgn007731	50.7843
BMgn002979	50.6938
BMgn002508	50.6765
BMgn005643	50.6395
BMgn003267	50.5988
BMgn007637	50.5984
BMgn002453	50.5705
BMgn005274	50.5109
BMgn012704	50.4982
BMgn001551	50.4893
BMgn004369	50.4745
BMgn006545	50.4732
BMgn013971	50.4709
BMgn011919	50.4595
BMgn004294	50.4569
BMgn004078	50.4376
BMgn006037	50.4047
BMgn001054	50.3134
BMgn007334	50.2966
BMgn006783	50.2228
BMgn008321	50.1582
BMgn009298	50.1001
BMgn010972	50.047
BMgn009978	50.0336
BMgn004088	49.9288
BMgn016628	49.9023
BMgn010057	49.8954
BMgn002978	49.8747
BMgn008664	49.8661
BMgn004158	49.8357
BMgn005436	49.825
BMgn010941	49.7906
BMgn001865	49.7736
BMgn012304	49.7689
BMgn003727	49.7344
BMgn011264	49.729
BMgn005080	49.6965
BMgn003872	49.6954
BMgn004963	49.6732
BMgn000132	49.6345
BMgn002151	49.5943
BMgn016776	49.5882
BMgn001406	49.5696
BMgn016410	49.5601
BMgn004692	49.5541
BMgn008851	49.5297
BMgn016476	49.4698
BMgn007988	49.4098
BMgn000979	49.3749
BMgn000167	49.2975
BMgn005344	49.2455
BMgn016193	49.2374
BMgn009700	49.216
BMgn000549	49.1377
BMgn001124	49.1032
BMgn008295	49.0883
BMgn000464	49.0591
BMgn010229	49.0342
BMgn003153	49.0243
BMgn009885	49.019
BMgn010642	48.954
BMgn005158	48.9339
BMgn016484	48.9326
BMgn000647	48.8908
BMgn012336	48.8828
BMgn015449	48.8755
BMgn001032	48.8589
BMgn015692	48.8363
BMgn000537	48.8305
BMgn016655	48.7518
BMgn001733	48.7179
BMgn003198	48.6718
BMgn006646	48.6691
BMgn001036	48.6688
BMgn016511	48.5775
BMgn006694	48.5729
BMgn014185	48.557
BMgn007727	48.5508
BMgn010366	48.4839
BMgn007064	48.4579
BMgn011592	48.4468
BMgn009062	48.3599
BMgn011498	48.3422
BMgn003698	48.2783
BMgn001178	48.1889
BMgn008613	48.1791
BMgn003053	48.1752
BMgn011007	48.1387
BMgn001159	48.1191
BMgn004846	48.1031
BMgn007845	48.0829
BMgn005509	48.0673
BMgn007771	48.0509
BMgn013813	48.0487
BMgn007402	48.0218
BMgn013713	47.9835
BMgn013852	47.9463
BMgn006275	47.9131
BMgn012973	47.8815
BMgn002030	47.7905
BMgn002363	47.7651
BMgn016048	47.75
BMgn000390	47.7387
BMgn009911	47.7212
BMgn008405	47.6263
BMgn007824	47.6183
BMgn006722	47.574
BMgn009395	47.5659
BMgn008564	47.5173
BMgn007964	47.5154
BMgn012472	47.4986
BMgn002709	47.4505
BMgn002984	47.4322
BMgn007493	47.4156
BMgn015425	47.4121
BMgn004437	47.3756
BMgn012268	47.3724
BMgn011357	47.3691
BMgn009323	47.3576
BMgn006011	47.3235
BMgn011219	47.2823
BMgn005798	47.2596
BMgn015133	47.2531
BMgn006474	47.2089
BMgn014928	47.1563
BMgn015162	47.13
BMgn006140	47.0403
BMgn006836	47.0161
BMgn009654	46.9935
BMgn000921	46.9647
BMgn014856	46.9514
BMgn004975	46.9464
BMgn013752	46.9388
BMgn004933	46.9246
BMgn011857	46.8877
BMgn000219	46.8808
BMgn011976	46.8198
BMgn004857	46.8162
BMgn008928	46.807
BMgn003833	46.8064
BMgn008478	46.7747
BMgn015893	46.7294
BMgn012531	46.7272
BMgn010622	46.6256
BMgn003560	46.621
BMgn012931	46.584
BMgn011805	46.5709
BMgn015146	46.56
BMgn001885	46.54
BMgn003474	46.5082
BMgn006919	46.4863
BMgn005374	46.4815
BMgn013380	46.4363
BMgn000187	46.432
BMgn001475	46.4112
BMgn001061	46.3872
BMgn004008	46.3619
BMgn015080	46.3272
BMgn002498	46.2423
BMgn005186	46.2139
BMgn011514	46.206
BMgn003763	46.1918
BMgn011809	46.1908
BMgn001825	46.1812
BMgn008525	46.1685
BMgn008357	46.1642
BMgn016724	46.1541
BMgn008350	46.0997
BMgn009106	46.0599
BMgn009964	45.9985
BMgn013365	45.9855
BMgn004935	45.8362
BMgn013491	45.8307
BMgn015156	45.8105
BMgn007330	45.8097
BMgn006208	45.7974
BMgn007044	45.7501
BMgn006473	45.7421
BMgn001157	45.7371
BMgn010309	45.7325
BMgn003627	45.692
BMgn010851	45.6805
BMgn012292	45.6799
BMgn015304	45.6703
BMgn000447	45.6616
BMgn012474	45.6554
BMgn011525	45.5864
BMgn004928	45.585
BMgn011862	45.5848
BMgn011852	45.5385
BMgn016171	45.5367
BMgn007514	45.5357
BMgn005646	45.5325
BMgn015039	45.5061
BMgn005035	45.4771
BMgn004389	45.4457
BMgn007192	45.4153
BMgn006616	45.362
BMgn014981	45.3404
BMgn001323	45.2904
BMgn007211	45.2831
BMgn002243	45.2814
BMgn005352	45.2522
BMgn009576	45.2426
BMgn005772	45.2335
BMgn008336	45.2306
BMgn009578	45.2106
BMgn014238	45.1893
BMgn006377	45.1677
BMgn006495	45.1519
BMgn002642	45.1485
BMgn005047	45.1431
BMgn000177	45.1318
BMgn011916	45.1027
BMgn005659	45.1005
BMgn012013	45.0784
BMgn008547	45.0658
BMgn016140	45.0512
BMgn003787	45.0428
BMgn000104	45.0411
BMgn003609	44.9979
BMgn014850	44.9805
BMgn008836	44.9375
BMgn016867	44.9234
BMgn001386	44.9117
BMgn007470	44.8669
BMgn011493	44.8433
BMgn008927	44.8251
BMgn008930	44.7983
BMgn008551	44.7929
BMgn002456	44.7496
BMgn007169	44.7181
BMgn011899	44.7104
BMgn001278	44.7028
BMgn006465	44.7024
BMgn007261	44.6941
BMgn000408	44.6688
BMgn015040	44.6462
BMgn011887	44.6347
BMgn014117	44.6322
BMgn017165	44.6214
BMgn008034	44.5822
BMgn006721	44.5378
BMgn007513	44.5369
BMgn001223	44.5208
BMgn006014	44.5143
BMgn010790	44.493
BMgn000511	44.4678
BMgn004978	44.4232
BMgn009618	44.4229
BMgn003820	44.385
BMgn011786	44.3314
BMgn011756	44.3313
BMgn001817	44.324
BMgn015990	44.2925
BMgn009307	44.2349
BMgn002641	44.1986
BMgn006692	44.1856
BMgn001239	44.1461
BMgn017138	44.1397
BMgn008626	44.0583
BMgn001500	44.0138
BMgn006779	43.982
BMgn009380	43.9523
BMgn005023	43.9309
BMgn013819	43.9071
BMgn009104	43.9001
BMgn016969	43.7996
BMgn005485	43.7836
BMgn004220	43.7805
BMgn001940	43.7763
BMgn017189	43.7689
BMgn005755	43.7563
BMgn011776	43.6615
BMgn004706	43.6074
BMgn008192	43.5996
BMgn008392	43.5336
BMgn012333	43.5179
BMgn012743	43.4903
BMgn010998	43.4334
BMgn016333	43.4259
BMgn007663	43.422
BMgn006589	43.4156
BMgn005300	43.409
BMgn001830	43.4065
BMgn006115	43.3786
BMgn008689	43.3535
BMgn015145	43.335
BMgn012008	43.317
BMgn003313	43.3103
BMgn000061	43.2896
BMgn011650	43.2473
BMgn010406	43.2457
BMgn005796	43.1867
BMgn014950	43.111
BMgn015393	43.1094
BMgn010621	43.0951
BMgn003007	43.0948
BMgn003319	43.0694
BMgn003367	43.0673
BMgn011871	43.0529
BMgn006459	42.9518
BMgn002091	42.9019
BMgn004898	42.7291
BMgn010361	42.6987
BMgn013497	42.6865
BMgn016305	42.6772
BMgn000898	42.6341
BMgn008520	42.5422
BMgn008371	42.4196
BMgn000468	42.3959
BMgn002593	42.3613
BMgn011934	42.3594
BMgn011818	42.3408
BMgn015515	42.3389
BMgn005464	42.333
BMgn011687	42.292
BMgn003658	42.2368
BMgn011947	42.2329
BMgn002559	42.2013
BMgn004927	42.1817
BMgn016147	42.164
BMgn004023	42.1377
BMgn007531	42.13
BMgn001801	42.0934
BMgn003506	42.0479
BMgn004913	42.016
BMgn006959	42.0085
BMgn005453	41.9817
BMgn000925	41.9712
BMgn011963	41.9647
BMgn014826	41.9321
BMgn003771	41.9138
BMgn005335	41.91
BMgn004224	41.8902
BMgn008347	41.8716
BMgn009139	41.849
BMgn005739	41.7912
BMgn006800	41.7821
BMgn003121	41.7603
BMgn011297	41.747
BMgn001916	41.7255
BMgn014106	41.7222
BMgn013349	41.6131
BMgn010525	41.4838
BMgn008855	41.4557
BMgn012459	41.4466
BMgn010974	41.4262
BMgn006964	41.4156
BMgn010257	41.3797
BMgn003632	41.356
BMgn004491	41.3558
BMgn003590	41.3474
BMgn007817	41.3439
BMgn000924	41.3426
BMgn000742	41.3356
BMgn002750	41.3329
BMgn013840	41.323
BMgn003401	41.2934
BMgn015531	41.2684
BMgn015707	41.2554
BMgn009496	41.2188
BMgn005469	41.1784
BMgn011246	41.1704
BMgn007790	41.1601
BMgn013343	41.1121
BMgn003563	41.0991
BMgn002790	41.0651
BMgn012855	41.0056
BMgn002159	40.9323
BMgn012200	40.9272
BMgn006359	40.9266
BMgn008650	40.9126
BMgn010396	40.8792
BMgn004985	40.8743
BMgn007501	40.8708
BMgn009051	40.8459
BMgn004904	40.7682
BMgn009881	40.7159
BMgn016316	40.6047
BMgn006787	40.5988
BMgn013504	40.581
BMgn001711	40.5809
BMgn008074	40.5784
BMgn009495	40.5469
BMgn004218	40.5179
BMgn007503	40.5044
BMgn006810	40.4658
BMgn002972	40.463
BMgn001898	40.4095
BMgn013495	40.3994
BMgn006753	40.3919
BMgn012320	40.3882
BMgn009636	40.3797
BMgn011841	40.3636
BMgn011166	40.3401
BMgn007769	40.3393
BMgn007796	40.3249
BMgn017284	40.3104
BMgn005473	40.2899
BMgn003358	40.1461
BMgn002921	40.1389
BMgn006823	40.1259
BMgn002721	40.0843
BMgn000106	40.0624
BMgn012230	40.02
BMgn006887	39.9811
BMgn002504	39.9342
BMgn016946	39.922
BMgn015273	39.8838
BMgn015050	39.8755
BMgn010225	39.8663
BMgn007676	39.859
BMgn005452	39.8484
BMgn007842	39.8456
BMgn014984	39.8069
BMgn001126	39.778
BMgn007869	39.7586
BMgn008004	39.7481
BMgn009133	39.666
BMgn011879	39.6642
BMgn007144	39.6459
BMgn013901	39.6402
BMgn003391	39.606
BMgn002219	39.5515
BMgn001953	39.5502
BMgn017141	39.5218
BMgn001253	39.5181
BMgn003184	39.4358
BMgn012694	39.4352
BMgn003997	39.2928
BMgn011473	39.2653
BMgn013973	39.2333
BMgn003490	39.2222
BMgn005841	39.2186
BMgn014115	39.1956
BMgn003468	39.187
BMgn004833	39.1698
BMgn005306	39.1567
BMgn003729	39.0951
BMgn003635	39.091
BMgn015574	39.0592
BMgn006975	39.0326
BMgn008477	39.0243
BMgn002375	39.0162
BMgn015339	39.008
BMgn000360	38.9881
BMgn001373	38.9672
BMgn005164	38.964
BMgn009463	38.9434
BMgn006267	38.9397
BMgn016337	38.9335
BMgn007630	38.8926
BMgn007304	38.8732
BMgn012127	38.8647
BMgn005072	38.8319
BMgn004136	38.825
BMgn006102	38.7932
BMgn011103	38.7904
BMgn000854	38.7893
BMgn010745	38.7809
BMgn009778	38.7793
BMgn001103	38.764
BMgn007301	38.7264
BMgn007518	38.7183
BMgn012080	38.7089
BMgn004691	38.6946
BMgn000102	38.6703
BMgn000803	38.6264
BMgn004903	38.5786
BMgn003545	38.5125
BMgn004501	38.4298
BMgn007159	38.3914
BMgn012977	38.3724
BMgn006134	38.3634
BMgn007025	38.3419
BMgn002671	38.323
BMgn005160	38.319
BMgn006607	38.2928
BMgn005845	38.2759
BMgn003711	38.2743
BMgn005287	38.2732
BMgn011511	38.2477
BMgn009221	38.1744
BMgn008724	38.1293
BMgn003663	38.1268
BMgn011296	38.0977
BMgn002975	38.0936
BMgn008873	38.086
BMgn005891	38.0644
BMgn007567	37.9414
BMgn008612	37.9408
BMgn010651	37.9345
BMgn007867	37.9142
BMgn015754	37.8686
BMgn015105	37.8473
BMgn010993	37.8149
BMgn013499	37.7796
BMgn006918	37.7673
BMgn010318	37.7506
BMgn006699	37.7216
BMgn011743	37.7185
BMgn007521	37.6749
BMgn000320	37.5991
BMgn006461	37.5793
BMgn004850	37.5728
BMgn014708	37.5495
BMgn006369	37.5318
BMgn012007	37.5149
BMgn009656	37.4852
BMgn016944	37.4058
BMgn006829	37.3979
BMgn013513	37.3928
BMgn003451	37.3918
BMgn003685	37.3877
BMgn012560	37.3777
BMgn006225	37.3605
BMgn003048	37.3515
BMgn008498	37.3274
BMgn005395	37.3154
BMgn015953	37.2901
BMgn006632	37.289
BMgn004409	37.286
BMgn010485	37.2577
BMgn001458	37.2274
BMgn003032	37.2166
BMgn016894	37.2075
BMgn005589	37.1962
BMgn006772	37.182
BMgn006850	37.1537
BMgn005042	37.1512
BMgn001628	37.1458
BMgn007535	37.1371
BMgn014236	37.1198
BMgn006403	37.0963
BMgn007200	37.094
BMgn008319	37.0892
BMgn010569	37.0679
BMgn010572	37.0388
BMgn002263	37.0371
BMgn004343	36.9969
BMgn011822	36.9904
BMgn012976	36.9714
BMgn017096	36.967
BMgn000409	36.9276
BMgn005263	36.9146
BMgn013147	36.8877
BMgn015019	36.884
BMgn016078	36.879
BMgn004931	36.8362
BMgn008226	36.8356
BMgn011250	36.8331
BMgn010173	36.8234
BMgn001197	36.8172
BMgn010438	36.8123
BMgn006680	36.8036
BMgn011281	36.7959
BMgn005081	36.7891
BMgn011808	36.7811
BMgn005655	36.7733
BMgn013503	36.7506
BMgn002436	36.6527
BMgn007688	36.6326
BMgn010802	36.6026
BMgn001037	36.5975
BMgn010388	36.5678
BMgn011491	36.5324
BMgn000722	36.4355
BMgn012678	36.3846
BMgn000882	36.3571
BMgn011509	36.3431
BMgn006118	36.3352
BMgn004154	36.3321
BMgn007078	36.3318
BMgn008548	36.3079
BMgn003555	36.3027
BMgn000696	36.2948
BMgn005991	36.2921
BMgn013112	36.2698
BMgn015782	36.2622
BMgn000095	36.2085
BMgn012125	36.1852
BMgn006065	36.1787
BMgn016968	36.166
BMgn012985	36.1506
BMgn002016	36.147
BMgn015122	36.1316
BMgn000198	36.1206
BMgn004127	36.1203
BMgn009250	36.119
BMgn013896	36.1004
BMgn005157	36.0962
BMgn015734	36.0945
BMgn014135	35.985
BMgn012211	35.9835
BMgn003206	35.9713
BMgn005592	35.9188
BMgn005641	35.9162
BMgn016176	35.9056
BMgn003390	35.8695
BMgn015251	35.86
BMgn012057	35.8422
BMgn003719	35.8363
BMgn001142	35.8309
BMgn000098	35.8072
BMgn013917	35.7951
BMgn001267	35.7841
BMgn000699	35.7531
BMgn007005	35.7439
BMgn010122	35.7294
BMgn004944	35.7254
BMgn007437	35.7083
BMgn004186	35.6939
BMgn007266	35.6905
BMgn001669	35.6882
BMgn016143	35.687
BMgn002481	35.6696
BMgn004711	35.6583
BMgn007077	35.6509
BMgn010524	35.6391
BMgn005298	35.6384
BMgn006092	35.6019
BMgn015913	35.5822
BMgn009295	35.5755
BMgn011403	35.5477
BMgn010088	35.5115
BMgn008010	35.5105
BMgn000991	35.5097
BMgn016522	35.4967
BMgn004119	35.4678
BMgn011669	35.4611
BMgn006711	35.4555
BMgn000973	35.3834
BMgn006912	35.357
BMgn012811	35.3281
BMgn001921	35.3119
BMgn015139	35.2687
BMgn008173	35.2641
BMgn005792	35.2417
BMgn010656	35.2201
BMgn005162	35.2137
BMgn006162	35.2086
BMgn011689	35.2078
BMgn015755	35.1801
BMgn008301	35.1795
BMgn009941	35.1599
BMgn007035	35.1544
BMgn014821	35.1289
BMgn001292	35.1233
BMgn008360	35.0878
BMgn009046	35.08
BMgn001748	35.0753
BMgn007789	35.0266
BMgn010927	35.0072
BMgn003747	35.0061
BMgn006631	34.9979
BMgn007103	34.9796
BMgn005339	34.9723
BMgn002594	34.9674
BMgn013145	34.9472
BMgn007506	34.9131
BMgn006816	34.9084
BMgn012734	34.9045
BMgn006891	34.9001
BMgn007478	34.8963
BMgn013506	34.8762
BMgn004694	34.8485
BMgn007485	34.8314
BMgn008922	34.8282
BMgn002304	34.8191
BMgn004568	34.8152
BMgn005126	34.8011
BMgn013098	34.7761
BMgn011380	34.7341
BMgn015324	34.7332
BMgn016996	34.7206
BMgn003255	34.7183
BMgn001477	34.7146
BMgn016754	34.7139
BMgn003021	34.697
BMgn004039	34.6831
BMgn012563	34.6736
BMgn008636	34.6603
BMgn015880	34.6594
BMgn009834	34.6591
BMgn003068	34.6282
BMgn004708	34.6155
BMgn006946	34.6103
BMgn011569	34.593
BMgn015537	34.5685
BMgn005776	34.5599
BMgn016382	34.545
BMgn006548	34.5423
BMgn000542	34.5356
BMgn012707	34.4917
BMgn006834	34.4907
BMgn000084	34.4838
BMgn011835	34.475
BMgn005426	34.4672
BMgn002437	34.437
BMgn007457	34.4262
BMgn009342	34.4162
BMgn007690	34.3902
BMgn000189	34.3159
BMgn000689	34.2987
BMgn005159	34.2819
BMgn012151	34.2537
BMgn014852	34.2454
[truncated: 6,813 more rows]

## Sheet: Essential genes in BmE
Gene ID	Expression
BMgn016002	8724.5
BMgn014972	7624.29
BMgn004911	6827.49
BMgn013792	4545.28
BMgn003608	4406.06
BMgn008903	4383.64
BMgn001501	3837.02
BMgn011948	3798.92
BMgn011620	3794.03
BMgn003197	3513.95
BMgn006867	3498.34
BMgn012414	3340.91
BMgn002811	3316.87
BMgn011467	3018.75
BMgn005928	3008.52
BMgn007645	2941.46
BMgn004356	2850.43
BMgn009751	2844.81
BMgn007661	2694.85
BMgn001043	2672.17
BMgn001243	2639.54
BMgn010571	2551.43
BMgn003978	2452.28
BMgn001363	2418.77
BMgn008881	2377.37
BMgn011416	2367.86
BMgn010139	2350.48
BMgn001471	2330.21
BMgn011282	2230.34
BMgn014094	2206.55
BMgn003726	2127.36
BMgn015572	2056.97
BMgn010487	1993.75
BMgn010867	1906.26
BMgn004165	1898.69
BMgn007795	1879.06
BMgn000867	1795.31
BMgn011446	1745.48
BMgn001106	1689.03
BMgn009863	1668.04
BMgn004612	1650.29
BMgn013157	1613.86
BMgn006986	1608.75
BMgn013413	1565.11
BMgn002381	1487.93
BMgn008921	1373.05
BMgn003337	1296.51
BMgn000201	902.307
BMgn003923	838.273
BMgn006414	835.778
BMgn002644	801.642
BMgn016162	759.243
BMgn006141	616.404
BMgn007477	594.057
BMgn002164	522.916
BMgn001318	491.292
BMgn008302	455.167
BMgn003186	379.566
BMgn010588	373.001
BMgn013464	370.119
BMgn005550	361.221
BMgn006415	352.805
BMgn010751	346.217
BMgn003412	310.578
BMgn006412	310.288
BMgn016490	308.275
BMgn004577	298.914
BMgn012356	298.381
BMgn003335	289.052
BMgn010365	280.2
BMgn011581	263.998
BMgn007114	260.911
BMgn005994	259.319
BMgn001183	253.982
BMgn010673	244.653
BMgn003361	236.93
BMgn001395	236.55
BMgn003009	236.32
BMgn011507	233.397
BMgn016878	226.904
BMgn017077	226.655
BMgn003309	225.611
BMgn011819	221.9
BMgn011936	214.607
BMgn007895	213.794
BMgn001853	213.689
BMgn004661	207.624
BMgn006828	204.938
BMgn010541	203.338
BMgn006158	202.91
BMgn016482	195.708
BMgn017088	194.422
BMgn013100	192.103
BMgn005425	190.224
BMgn011824	187.312
BMgn016587	180.244
BMgn003758	176.808
BMgn003398	173.344
BMgn016814	172.061
BMgn004164	167.478
BMgn004655	152.591
BMgn007495	148.863
BMgn011618	147.605
BMgn007490	147.15
BMgn001302	143.192
BMgn013898	141.412
BMgn013801	140.65
BMgn013451	138.542
BMgn012032	138.172
BMgn002582	130.014
BMgn007594	129.806
BMgn010246	129.397
BMgn012772	124.353
BMgn005347	119.683
BMgn003004	114.734
BMgn006497	112.237
BMgn009372	111.772
BMgn016049	110.989
BMgn009795	110.667
BMgn011973	108.281
BMgn002551	108.157
BMgn012004	107.185
BMgn001252	107.01
BMgn003704	106.069
BMgn003985	106.056
BMgn014122	105.142
BMgn001165	103.524
BMgn009049	99.2895
BMgn003196	98.5314
BMgn006357	97.3335
BMgn013566	96.8001
BMgn001166	94.6927
BMgn009845	93.2848
BMgn010723	91.5486
BMgn013511	91.427
BMgn001637	89.0717
BMgn006523	87.2895
BMgn004980	86.995
BMgn013680	84.8974
BMgn002779	84.0447
BMgn016673	81.6206
BMgn010668	81.2766
BMgn003977	80.763
BMgn016150	80.6274
BMgn012689	80.4829
BMgn004573	80.4674
BMgn013508	79.3765
BMgn006945	79.1468
BMgn004782	78.9125
BMgn003362	77.7879
BMgn013678	75.1474
BMgn007524	74.8604
BMgn012224	74.2937
BMgn001460	73.7731
BMgn002215	73.0202
BMgn003840	72.9437
BMgn001189	72.0329
BMgn007263	71.9757
BMgn008542	71.7528
BMgn010150	71.7509
BMgn002241	71.0489
BMgn007082	69.9685
BMgn003652	69.9609
BMgn012072	67.9751
BMgn007460	67.8867
BMgn000995	67.3132
BMgn012851	67.3126
BMgn014403	67.1792
BMgn015807	67.0039
BMgn003974	66.7357
BMgn014121	65.9008
BMgn002346	64.7797
BMgn006931	64.3201
BMgn011584	63.4224
BMgn011008	61.1086
BMgn006957	60.112
BMgn008854	59.4023
BMgn010068	59.3032
BMgn000412	58.8059
BMgn000980	58.7972
BMgn005519	58.4375
BMgn013025	58.3231
BMgn004892	58.2326
BMgn007586	57.9955
BMgn004315	57.5072
BMgn012295	57.2881
BMgn007583	57.2677
BMgn000955	57.1368
BMgn009895	57.1157
BMgn006752	56.7413
BMgn009817	56.2433
BMgn006627	55.6426
BMgn003767	54.3896
BMgn010593	53.708
BMgn002359	53.657
BMgn003699	53.6533
BMgn005503	53.4738
BMgn006848	53.4585
BMgn016645	52.7282
BMgn009999	52.6944
BMgn006477	52.6884
BMgn003421	52.6295
BMgn005650	51.8757
BMgn001035	51.6686
BMgn003267	50.5988
BMgn007637	50.5984
BMgn004294	50.4569
BMgn007334	50.2966
BMgn009298	50.1001
BMgn010057	49.8954
BMgn002978	49.8747
BMgn004963	49.6732
BMgn008851	49.5297
BMgn007988	49.4098
BMgn005344	49.2455
BMgn011498	48.3422
BMgn007845	48.0829
BMgn002363	47.7651
BMgn009911	47.7212
BMgn015133	47.2531
BMgn006140	47.0403
BMgn011976	46.8198
BMgn004857	46.8162
BMgn003474	46.5082
BMgn011514	46.206
BMgn001825	46.1812
BMgn008525	46.1685
BMgn003627	45.692
BMgn012474	45.6554
BMgn007192	45.4153
BMgn008336	45.2306
BMgn006495	45.1519
BMgn000177	45.1318
BMgn005659	45.1005
BMgn001386	44.9117
BMgn011493	44.8433
BMgn007169	44.7181
BMgn006014	44.5143
BMgn015990	44.2925
BMgn005755	43.7563
BMgn015145	43.335
BMgn011650	43.2473
BMgn010621	43.0951
BMgn006459	42.9518
BMgn000898	42.6341
BMgn000925	41.9712
BMgn011963	41.9647
BMgn014826	41.9321
BMgn005739	41.7912
BMgn006964	41.4156
BMgn003401	41.2934
BMgn002790	41.0651
BMgn012200	40.9272
BMgn010396	40.8792
BMgn007503	40.5044
BMgn002972	40.463
BMgn001898	40.4095
BMgn007796	40.3249
BMgn007676	39.859
BMgn005452	39.8484
BMgn007842	39.8456
BMgn014984	39.8069
BMgn017141	39.5218
BMgn003997	39.2928
BMgn005306	39.1567
BMgn000360	38.9881
BMgn009463	38.9434
BMgn005072	38.8319
BMgn006102	38.7932
BMgn006134	38.3634
BMgn006607	38.2928
BMgn009221	38.1744
BMgn015754	37.8686
BMgn003451	37.3918
BMgn012560	37.3777
BMgn006772	37.182
BMgn001628	37.1458
BMgn011250	36.8331
BMgn010173	36.8234
BMgn013503	36.7506
BMgn010802	36.6026
BMgn008548	36.3079
BMgn005991	36.2921
BMgn013112	36.2698
BMgn013896	36.1004
BMgn014135	35.985
BMgn001142	35.8309
BMgn002481	35.6696
BMgn004711	35.6583
BMgn008010	35.5105
BMgn006711	35.4555
BMgn001921	35.3119
BMgn015139	35.2687
BMgn002594	34.9674
BMgn012734	34.9045
BMgn013506	34.8762
BMgn008922	34.8282
BMgn005126	34.8011
BMgn005776	34.5599
BMgn000542	34.5356
BMgn006834	34.4907
BMgn012151	34.2537
BMgn008335	34.0323
BMgn003744	34.0236
BMgn013902	33.9945
BMgn002340	33.9465
BMgn012672	33.9168
BMgn007222	33.4837
BMgn005268	33.4667
BMgn008467	33.4264
BMgn002360	33.3572
BMgn011631	33.3493
BMgn008088	33.23
BMgn012517	33.0686
BMgn003815	32.9868
BMgn014402	32.773
BMgn009504	32.7508
BMgn011562	32.5437
BMgn000362	32.3757
BMgn009182	31.8784
BMgn010154	31.7682
BMgn003151	31.3273
BMgn006178	31.0052
BMgn013063	30.972
BMgn007879	30.8795
BMgn008549	30.6221
BMgn005288	30.4744
BMgn007773	30.4527
BMgn013974	30.3537
BMgn004516	30.2938
BMgn006851	30.1766
BMgn000394	30.1264
BMgn004979	29.9191
BMgn002153	29.7514
BMgn007940	29.4488
BMgn011747	29.2165
BMgn000154	29.2153
BMgn016368	29.2029
BMgn001169	29.0406
BMgn007017	28.9737
BMgn010376	28.8345
BMgn011827	28.7265
BMgn003001	28.6994
BMgn005634	28.6672
BMgn011978	28.6628
BMgn002818	28.6389
BMgn012759	28.6385
BMgn000120	28.2924
BMgn007205	28.2389
BMgn007581	28.1593
BMgn005488	27.8541
BMgn010756	27.4714
BMgn003301	27.457
BMgn003183	27.3795
BMgn002460	27.3564
BMgn005290	27.2074
BMgn003668	27.1425
BMgn007835	26.8967
BMgn012775	26.7844
BMgn003126	26.7635
BMgn007210	26.6868
BMgn003777	26.6698
BMgn006222	26.6626
BMgn013134	26.6494
BMgn011804	26.5964
BMgn005570	26.5357
BMgn006956	26.257
BMgn002973	26.0937
BMgn016454	26.085
BMgn006634	25.6645
BMgn007431	25.5338
BMgn004905	25.4985
BMgn015519	25.4177
BMgn009888	25.3997
BMgn002188	25.319
BMgn009963	25.1074
BMgn008116	25.085
BMgn002208	25.0212
BMgn004936	25.0046
BMgn001250	24.9771
BMgn007870	24.9439
BMgn000074	24.9103
BMgn011924	24.8513
BMgn000930	24.8021
BMgn005388	24.7516
BMgn005022	24.6102
BMgn010561	24.6075
BMgn003377	24.5666
BMgn012353	24.3778
BMgn001496	24.3232
BMgn012397	24.2944
BMgn011615	24.2729
BMgn001509	24.2721
BMgn013527	24.101
BMgn009662	23.9429
BMgn002837	23.8972
BMgn001478	23.7637
BMgn011089	23.755
BMgn001818	23.7318
BMgn012960	23.4476
BMgn001160	23.3731
BMgn010619	23.2712
BMgn000323	23.1718
BMgn005834	23.1673
BMgn005323	23.163
BMgn002820	22.8858
BMgn004738	22.8326
BMgn008783	22.7814
BMgn004128	22.5214
BMgn007539	22.5075
BMgn017016	22.3793
BMgn011028	22.3717
BMgn010234	21.979
BMgn004558	21.9177
BMgn005943	21.8769
BMgn004915	21.7689
BMgn008714	21.415
BMgn011131	21.3602
BMgn001950	21.2581
BMgn003954	21.2137
BMgn007080	21.013
BMgn013146	20.9615
BMgn005448	20.9242
BMgn008842	20.9066
BMgn005949	20.899
BMgn003480	20.8206
BMgn001137	20.7558
BMgn013496	20.6188
BMgn013922	20.4393
BMgn005151	20.4381
BMgn002931	20.3454
BMgn017167	20.2916
BMgn008521	19.9971
BMgn010827	19.9883
BMgn001638	19.9688
BMgn010628	19.8854
BMgn008447	19.8809
BMgn008048	19.6913
BMgn012516	19.5268
BMgn007424	19.5069
BMgn004920	19.3757
BMgn012829	19.3628
BMgn005106	19.2994
BMgn016116	19.2078
BMgn012536	19.0926
BMgn012852	19.0799
BMgn012100	18.6903
BMgn005217	18.6834
BMgn012683	18.6062
BMgn013150	18.5723
BMgn005797	18.543
BMgn002829	18.5419
BMgn002707	18.5097
BMgn007582	18.4302
BMgn011662	18.0909
BMgn006687	17.8824
BMgn012893	17.6837
BMgn010397	17.6373
BMgn003378	17.6366
BMgn011450	17.6131
BMgn003862	17.5985
BMgn000103	17.5813
BMgn016014	17.4278
BMgn002808	17.4252
BMgn001009	17.395
BMgn007523	17.251
BMgn004201	17.1964
BMgn010200	17.0547
BMgn003892	16.949
BMgn010510	16.8535
BMgn003385	16.8188
BMgn011133	16.788
BMgn001423	16.419
BMgn009835	16.3761
BMgn005799	16.243
BMgn011476	16.1496
BMgn013230	16.1062
BMgn000399	16.0993
BMgn010147	16.002
BMgn009664	15.9902
BMgn014829	15.9493
BMgn007194	15.8195
BMgn006813	15.8029
BMgn002217	15.7492
BMgn009425	15.7335
BMgn004273	15.7271
BMgn000839	15.5934
BMgn001788	15.5414
BMgn005111	15.5253
BMgn010884	15.5226
BMgn006045	15.4621
BMgn010931	15.4613
BMgn012470	15.2619
BMgn001522	15.2599
BMgn001257	15.1634
BMgn009619	15.1234
BMgn011755	15.0029
BMgn001766	14.9581
BMgn001425	14.6844
BMgn012793	14.6649
BMgn013200	14.6383
BMgn001283	14.5869
BMgn009468	14.5258
BMgn001190	14.4423
BMgn016330	14.3619
BMgn011995	14.3307
BMgn003294	14.3264
BMgn006108	14.2975
BMgn007221	14.2336
BMgn003578	14.2146
BMgn010964	14.1907
BMgn009980	14.1029
BMgn000767	14.0501
BMgn008503	14.0422
BMgn004849	13.983
BMgn001699	13.8913
BMgn008014	13.8884
BMgn007669	13.8232
BMgn012039	13.7333
BMgn011229	13.5198
BMgn006845	13.4841
BMgn006630	13.4268
BMgn011417	13.3957
BMgn001282	13.3838
BMgn005483	13.2689
BMgn012700	13.1912
BMgn009373	12.989
BMgn007293	12.9206
BMgn005377	12.8663
BMgn009458	12.8336
BMgn006778	12.822
BMgn015943	12.7372
BMgn010711	12.4883
BMgn009859	12.3465
BMgn002656	12.304
BMgn008924	12.264
BMgn014732	12.2522
BMgn003182	12.2343
BMgn006613	12.2066
BMgn004785	12.0675
BMgn010576	11.9948
BMgn006888	11.9894
BMgn013299	11.7766
BMgn005089	11.7671
BMgn012514	11.7631
BMgn011307	11.7364
BMgn007466	11.6796
BMgn004517	11.6609
BMgn002926	11.5279
BMgn004698	11.5056
BMgn003712	11.4256
BMgn011810	11.3958
BMgn011117	11.3943
BMgn009225	11.3546
BMgn010227	11.2664
BMgn010499	11.2239
BMgn001062	11.1684
BMgn004758	11.1496
BMgn013166	11.1295
BMgn004036	11.0428
BMgn006328	11.0034
BMgn000663	10.894
BMgn015491	10.8186
BMgn007954	10.7005
BMgn005167	10.6933
BMgn011793	10.6688
BMgn008785	10.6614
BMgn005451	10.5947
BMgn013407	10.5004
BMgn012776	10.4843
BMgn004845	10.4597
BMgn009855	10.4374
BMgn015778	10.431
BMgn007459	10.414
BMgn000518	10.3383
BMgn008433	10.2872
BMgn006854	10.2791
BMgn006706	10.2536
BMgn007510	10.1947
BMgn009883	10.0945
BMgn014143	9.93544
BMgn007449	9.91801
BMgn003607	9.91692
BMgn017326	9.88069
BMgn014803	9.80929
BMgn009848	9.67527
BMgn012038	9.60943
BMgn010864	9.59047
BMgn013453	9.57165
BMgn003200	9.5306
BMgn010210	9.52365
BMgn008989	9.50203
BMgn008720	9.46761
BMgn007847	9.46705
BMgn004818	9.42226
BMgn012120	9.39476
BMgn013842	9.35006
BMgn016852	9.33161
BMgn005107	9.30266
BMgn011735	9.29586
BMgn002687	9.20501
BMgn007709	9.16167
BMgn000771	8.97224
BMgn016357	8.8974
BMgn001654	8.86828
BMgn004745	8.84452
BMgn008399	8.73567
BMgn007613	8.69766
BMgn006103	8.67029
BMgn009465	8.58946
BMgn011448	8.5404
BMgn001770	8.45464
BMgn006258	8.42524
BMgn012886	8.36397
BMgn004373	8.27604
BMgn016922	8.26092
BMgn016609	8.25058
BMgn008047	8.22163
BMgn002236	8.17661
BMgn010074	8.13266
BMgn008596	8.03998
BMgn016877	8.01622
BMgn016120	7.90943
BMgn013854	7.89313
BMgn011184	7.87955
BMgn005594	7.86152
BMgn000853	7.76963
BMgn008825	7.76092
BMgn003318	7.63545
BMgn009170	7.6041
BMgn013997	7.58897
BMgn000140	7.55537
BMgn010273	7.53569
BMgn011576	7.50212
BMgn004890	7.45343
BMgn009122	7.43167
BMgn014174	7.42904
BMgn005582	7.40286
BMgn005308	7.35956
BMgn011568	7.31203
BMgn002776	7.28432
BMgn000800	7.2105
BMgn014805	7.20248
BMgn013624	7.11405
BMgn009262	7.05532
BMgn015554	7.04952
BMgn010474	7.04647
BMgn009126	6.99556
BMgn010260	6.95289
BMgn011178	6.71067
BMgn005882	6.65741
BMgn010171	6.63527
BMgn000513	6.53391
BMgn005930	6.5286
BMgn015223	6.36471
BMgn004696	6.34374
BMgn006411	6.32322
BMgn003446	6.29997
BMgn007874	6.28793
BMgn006638	6.23476
BMgn007782	6.11476
BMgn012005	6.06273
BMgn009228	5.96767
BMgn011663	5.8583
BMgn013255	5.85626
BMgn007974	5.71172
BMgn012795	5.65507
BMgn007615	5.61641
BMgn013180	5.61252
BMgn004137	5.59413
BMgn010748	5.54021
BMgn008896	5.51751
BMgn000754	5.48155
BMgn000359	5.37332
BMgn003989	5.32167
BMgn006044	5.31265
BMgn007718	5.31212
BMgn007963	5.29739
BMgn003961	5.28884
BMgn016033	5.2426
BMgn003350	5.21682
BMgn015237	5.0952
BMgn011155	5.06005
BMgn000355	5.02133
BMgn001985	4.97265
BMgn005601	4.96413
BMgn001835	4.91873
BMgn007741	4.89602
BMgn007973	4.89238
BMgn002377	4.8502
BMgn012856	4.83745
BMgn010228	4.76882
BMgn012610	4.65517
BMgn010797	4.55047
BMgn011071	4.4126
BMgn012525	4.40951
BMgn005854	4.30869
BMgn008910	4.2561
BMgn011191	4.25015
BMgn007603	4.21534
BMgn001777	4.18682
BMgn002401	4.16123
BMgn004665	4.06487
BMgn013055	4.02878
BMgn011175	3.96124
BMgn013675	3.84496
BMgn013621	3.8392
BMgn010519	3.74079
BMgn012625	3.69378
BMgn004874	3.6853
BMgn013251	3.67911
BMgn009968	3.66426
BMgn013556	3.64671
BMgn009917	3.63202
BMgn015618	3.58466
BMgn007527	3.5557
BMgn000726	3.48338
BMgn016733	3.456
BMgn000786	3.43653
BMgn008275	3.41466
BMgn010791	3.41319
BMgn011745	3.39781
BMgn013250	3.38911
BMgn012693	3.35974
BMgn006010	3.29862
BMgn009489	3.07248
BMgn004513	3.0003
BMgn007622	2.96708
BMgn012564	2.94739
BMgn007987	2.93318
BMgn001881	2.90017
BMgn006611	2.89987
BMgn004873	2.85054
BMgn013222	2.83582
BMgn006640	2.74208
BMgn000909	2.72097
BMgn005450	2.71731
BMgn000813	2.69929
BMgn007481	2.66223
BMgn011603	2.58931
BMgn009831	2.57853
BMgn006370	2.5447
BMgn000852	2.51923
BMgn008472	2.49673
BMgn012918	2.48158
BMgn006056	2.40476
BMgn011353	2.34856
BMgn016937	2.26359
BMgn009074	2.2523
BMgn002193	2.16744
BMgn005061	2.05352
BMgn012244	2.02918
BMgn015286	1.95824
BMgn015732	1.94955
BMgn005572	1.89388
BMgn012387	1.8805
BMgn014239	1.86587
BMgn008277	1.85682
BMgn007606	1.82483
BMgn015142	1.73422
BMgn016982	1.68268
BMgn015558	1.64973
BMgn015067	1.61472
BMgn004393	1.53611
BMgn012681	1.4564
BMgn012452	1.35696
BMgn010156	1.29319
BMgn014998	1.27888
BMgn008473	1.26471
BMgn013534	1.24294
BMgn007871	1.2192
BMgn009294	1.21375
BMgn004671	1.20273
BMgn015148	1.16402
BMgn000755	1.15031
BMgn003705	1.11466
BMgn010966	1.07317
BMgn012086	1.06222
BMgn006297	1.05089
BMgn016489	1.04861
BMgn009173	1.02693
BMgn009070	1.01757

## Sheet: Growth-restricting genes in BmE
Gene ID	Expression
BMgn008865	3443.69
BMgn000475	476.031
BMgn013545	400.844
BMgn005576	274.227
BMgn005560	266.675
BMgn011746	265.151
BMgn010030	226.082
BMgn004000	179.362
BMgn011371	179.198
BMgn010959	159.789
BMgn003671	157.045
BMgn015741	151.48
BMgn015447	143.074
BMgn009571	133.041
BMgn010739	101.578
BMgn015679	100.213
BMgn001593	94.9509
BMgn008846	89.5562
BMgn016990	81.9949
BMgn009755	80.5525
BMgn014851	79.0586
BMgn005372	73.6863
BMgn014093	69.9419
BMgn007642	69.8365
BMgn014892	68.8307
BMgn012082	64.8312
BMgn015643	63.9575
BMgn000222	61.0116
BMgn004020	60.5884
BMgn003586	60.4387
BMgn008668	60.2531
BMgn004972	58.6691
BMgn010620	56.3017
BMgn014804	56.2805
BMgn006872	54.6197
BMgn003202	54.4459
BMgn003187	53.1359
BMgn011062	51.1994
BMgn012081	50.9462
BMgn011919	50.4595
BMgn006037	50.4047
BMgn008321	50.1582
BMgn005436	49.825
BMgn003872	49.6954
BMgn006694	48.5729
BMgn003698	48.2783
BMgn013813	48.0487
BMgn013852	47.9463
BMgn012931	46.584
BMgn005374	46.4815
BMgn011809	46.1908
BMgn008927	44.8251
BMgn005485	43.7836
BMgn012743	43.4903
BMgn007663	43.422
BMgn003007	43.0948
BMgn003771	41.9138
BMgn003121	41.7603
BMgn002750	41.3329
BMgn015531	41.2684
BMgn015707	41.2554
BMgn009496	41.2188
BMgn007501	40.8708
BMgn009636	40.3797
BMgn011841	40.3636
BMgn003490	39.2222
BMgn007025	38.3419
BMgn016894	37.2075
BMgn011281	36.7959
BMgn011808	36.7811
BMgn001037	36.5975
BMgn011491	36.5324
BMgn012678	36.3846
BMgn015782	36.2622
BMgn002016	36.147
BMgn009295	35.5755
BMgn006891	34.9001
BMgn007478	34.8963
BMgn003021	34.697
BMgn008636	34.6603
BMgn016382	34.545
BMgn000689	34.2987
BMgn012577	34.0081
BMgn013493	33.3366
BMgn012688	33.134
BMgn004337	32.4317
BMgn005852	32.0636
BMgn005304	32.0103
BMgn000237	31.9624
BMgn000975	31.6186
BMgn006541	30.8356
BMgn015790	30.8052
BMgn005688	30.4018
BMgn005642	30.2167
BMgn007093	30.0606
BMgn008879	30.0306
BMgn014129	29.3349
BMgn005416	29.2336
BMgn003124	29.0838
BMgn012450	29.0319
BMgn010488	28.9865
BMgn005044	28.6877
BMgn009640	28.4245
BMgn008175	27.7865
BMgn015842	27.7566
BMgn010151	27.3682
BMgn015961	27.078
BMgn008605	26.9705
BMgn003430	26.7539
BMgn010437	26.6206
BMgn011042	26.5009
BMgn012975	26.3548
BMgn008900	26.0327
BMgn000948	25.0779
BMgn012310	24.9407
BMgn007170	24.7468
BMgn009216	24.6998
BMgn011772	24.5941
BMgn006517	24.3354
BMgn005586	24.2739
BMgn012916	23.6501
BMgn008155	23.4737
BMgn000321	23.3538
BMgn014920	23.2574
BMgn000350	23.1981
BMgn016758	23.0017
BMgn007808	22.8322
BMgn008238	22.7374
BMgn006763	22.7212
BMgn014775	22.6967
BMgn004415	22.608
BMgn000715	22.4939
BMgn017112	22.2634
BMgn001219	22.0613
BMgn002778	22.0405
BMgn008157	21.8762
BMgn001739	21.3682
BMgn011939	21.3355
BMgn003496	21.3061
BMgn007298	21.0986
BMgn012366	21.0641
BMgn008288	20.9895
BMgn000620	20.8032
BMgn003536	20.6647
BMgn017194	20.1353
BMgn001841	19.9514
BMgn005009	18.7989
BMgn008185	18.2717
BMgn007063	18.2259
BMgn016369	18.2076
BMgn014818	17.9744
BMgn001626	17.8927
BMgn014943	17.7131
BMgn002483	17.5117
BMgn009852	17.4229
BMgn005305	17.3316
BMgn016027	17.0523
BMgn006933	16.6645
BMgn010464	16.5947
BMgn005858	15.8348
BMgn005183	15.7642
BMgn016829	15.452
BMgn000366	15.4449
BMgn001449	15.409
BMgn003949	15.3961
BMgn003364	15.3141
BMgn007345	15.264
BMgn005879	15.1867
BMgn007612	14.8659
BMgn009236	14.8479
BMgn012108	14.8356
BMgn003040	14.771
BMgn008387	14.7162
BMgn013793	14.6573
BMgn001102	14.6263
BMgn003045	14.4164
BMgn001944	14.3064
BMgn010719	14.295
BMgn013897	14.2386
BMgn014971	14.0289
BMgn006727	13.9614
BMgn011162	13.8872
BMgn015147	13.8307
BMgn012725	13.7812
BMgn008874	13.6841
BMgn008495	13.5114
BMgn016728	13.0037
BMgn009022	13.0009
BMgn002666	12.9455
BMgn009836	12.8422
BMgn014731	12.4366
BMgn001722	12.3719
BMgn005639	12.3679
BMgn002080	12.3511
BMgn017067	12.144
BMgn007576	12.11
BMgn010377	12.0064
BMgn015366	12.0042
BMgn000118	11.9531
BMgn001939	11.9422
BMgn007945	11.8955
BMgn012396	11.8796
BMgn008555	11.7299
BMgn013501	11.7095
BMgn009975	11.6844
BMgn015030	11.5481
BMgn008284	11.3244
BMgn014671	11.2501
BMgn002815	11.2303
BMgn004555	11.192
BMgn004758	11.1496
BMgn015177	11.0832
BMgn000063	11.0689
BMgn015416	10.994
BMgn012178	10.9787
BMgn011372	10.5919
BMgn006736	10.5511
BMgn016263	10.5228
BMgn007853	10.4706
BMgn013084	10.3705
BMgn002625	10.0776
BMgn016487	10.0508
BMgn004054	10.0403
BMgn003659	9.84751
BMgn008690	9.81907
BMgn008484	9.78944
BMgn009876	9.76565
BMgn014833	9.7118
BMgn006410	9.69085
BMgn010090	9.65983
BMgn010336	9.65301
BMgn010508	9.49666
BMgn002793	9.47522
BMgn010585	9.44209
BMgn008694	9.43181
BMgn009707	9.38509
BMgn007961	9.37439
BMgn009456	9.28668
BMgn004955	9.17974
BMgn008020	9.17215
BMgn012006	8.90866
BMgn014131	8.90667
BMgn008697	8.89855
BMgn006682	8.68099
BMgn007632	8.66328
BMgn013163	8.64483
BMgn002014	8.58142
BMgn005185	8.57461
BMgn001402	8.53365
BMgn010731	8.35751
BMgn004959	8.30102
BMgn004414	8.14409
BMgn010965	8.12968
BMgn011181	8.11878
BMgn014806	8.04264
BMgn002658	8.0421
BMgn009894	8.01891
BMgn008999	7.98751
BMgn016846	7.97871
BMgn007322	7.71644
BMgn003487	7.579
BMgn001466	7.55822
BMgn001657	7.48206
BMgn005447	7.45012
BMgn002495	7.39681
BMgn008983	7.36385
BMgn006186	7.34897
BMgn007922	7.34367
BMgn007331	7.32998
BMgn015993	7.21435
BMgn008993	7.20134
BMgn002717	7.1972
BMgn003588	7.1519
BMgn013535	7.12148
BMgn017231	7.08062
BMgn010327	7.07996
BMgn005682	7.00336
BMgn009740	6.83108
BMgn012992	6.71385
BMgn001233	6.63488
BMgn012074	6.58542
BMgn003152	6.45213
BMgn001484	6.38353
BMgn007784	6.36591
BMgn009898	6.35791
BMgn005356	6.35296
BMgn003393	6.30812
BMgn010071	6.28
BMgn006657	6.1591
BMgn008388	6.15663
BMgn016520	5.93488
BMgn002840	5.65086
BMgn008129	5.63153
BMgn017057	5.38345
BMgn011742	5.2451
BMgn008961	5.16554
BMgn016244	5.03333
BMgn017234	4.99061
BMgn004235	4.98463
BMgn016523	4.92057
BMgn011923	4.84138
BMgn017144	4.61458
BMgn016700	4.60052
BMgn007337	4.54403
BMgn006857	4.4721
BMgn007001	4.46335
BMgn010786	4.45997
BMgn004953	4.36449
BMgn003251	4.21366
BMgn000711	4.20113
BMgn002597	4.16435
BMgn012518	4.1458
BMgn008727	3.95411
BMgn012993	3.93869
BMgn009382	3.89406
BMgn007552	3.79047
BMgn015590	3.76333
BMgn016248	3.74299
BMgn012914	3.61378
BMgn001622	3.56375
BMgn012479	3.53532
BMgn014728	3.4805
BMgn001069	3.44579
BMgn010713	3.31773
BMgn006636	3.27197
BMgn000508	3.25103
BMgn009750	3.24132
BMgn015409	3.2084
BMgn010975	3.15325
BMgn003227	3.05205
BMgn000625	3.02267
BMgn013629	3.02239
BMgn003092	2.97403
BMgn015510	2.94526
BMgn015924	2.93187
BMgn013891	2.88084
BMgn000297	2.79631
BMgn000150	2.78779
BMgn011171	2.7767
BMgn006048	2.74106
BMgn006547	2.7122
BMgn016035	2.69513
BMgn003594	2.69301
BMgn002596	2.63486
BMgn016290	2.6331
BMgn016271	2.6117
BMgn013531	2.58035
BMgn012528	2.57657
BMgn009548	2.5232
BMgn006798	2.48377
BMgn008701	2.48348
BMgn014854	2.4558
BMgn001193	2.45124
BMgn012779	2.39068
BMgn013115	2.38249
BMgn015222	2.36691
BMgn016640	2.3431
BMgn013332	2.33679
BMgn011038	2.30075
BMgn009580	2.29136
BMgn015119	2.28162
BMgn001695	2.27014
BMgn012197	2.2237
BMgn014709	2.21601
BMgn013416	2.16824
BMgn017105	2.08732
BMgn015478	2.07807
BMgn006744	2.02851
BMgn016534	1.88119
BMgn003808	1.81725
BMgn015303	1.80259
BMgn009758	1.79723
BMgn016493	1.7927
BMgn016359	1.79226
BMgn015628	1.62882
BMgn004537	1.59516
BMgn016434	1.59215
BMgn003115	1.52855
BMgn010373	1.50353
BMgn011163	1.50254
BMgn017127	1.46065
BMgn011086	1.43186
BMgn011367	1.42853
BMgn002928	1.26518
BMgn006527	1.2548
BMgn011197	1.2164
BMgn008806	1.20206
BMgn014371	1.18964
BMgn009006	1.16606
BMgn001299	1.14416
BMgn004200	1.09426
BMgn008933	1.05907
BMgn012948	1.05116
BMgn010252	1.02838
BMgn014947	1.02543
BMgn007805	1.00545

## Sheet: All genes in SG
Gene ID	Expression
BMgn005111	97291.7
BMgn014828	65592.9
BMgn009393	51975.3
BMgn014972	30652.2
BMgn005302	21458.6
BMgn015758	19185.8
BMgn001347	15716.9
BMgn016112	15593.2
BMgn003608	14297.1
BMgn000867	12540.3
BMgn016002	11695.1
BMgn005928	10142.3
BMgn016259	9813.8
BMgn016383	9803.92
BMgn004911	9779.1
BMgn017339	9609.71
BMgn008881	9550.43
BMgn000395	9166.79
BMgn008903	8771.78
BMgn007645	8077.05
BMgn001043	7515.7
BMgn009094	7462.87
BMgn007743	7430.58
BMgn015572	7319.32
BMgn014094	7303.21
BMgn003397	7216.08
BMgn011416	7183.45
BMgn002811	6916.35
BMgn013567	6821.9
BMgn017135	6716.27
BMgn007363	6630.84
BMgn001483	6596.91
BMgn001991	6454.1
BMgn010970	6426.13
BMgn001501	6281.42
BMgn003197	6131.05
BMgn011901	6010.96
BMgn013157	5920.75
BMgn010604	5914.32
BMgn013792	5899.45
BMgn004375	5895.83
BMgn002572	5731.81
BMgn002381	5720.72
BMgn009130	5641.97
BMgn003073	5617.93
BMgn012626	5303.93
BMgn000959	5277.41
BMgn008865	5267.38
BMgn010487	5167.45
BMgn012546	5121.55
BMgn001800	5086.76
BMgn011948	5068.33
BMgn007701	5054.78
BMgn011620	5048.07
BMgn011467	5020.82
BMgn003412	4942.63
BMgn004374	4918.17
BMgn009208	4913.11
BMgn016517	4851.01
BMgn011282	4791
BMgn003309	4763.42
BMgn004165	4761.4
BMgn011273	4720.95
BMgn007661	4689.64
BMgn011844	4674.95
BMgn006986	4670.61
BMgn013076	4587.04
BMgn004356	4525.45
BMgn015225	4490.95
BMgn001471	4416.24
BMgn011446	4409.45
BMgn009751	4311.78
BMgn009863	4213.94
BMgn007710	4026.91
BMgn010571	3966.74
BMgn003978	3885.57
BMgn010139	3789.09
BMgn005299	3751.75
BMgn006867	3733.47
BMgn000504	3702.33
BMgn003337	3678.54
BMgn001243	3659.52
BMgn005684	3636.99
BMgn007795	3590.71
BMgn004965	3570.19
BMgn008302	3409.28
BMgn001363	3402.4
BMgn012414	3326.14
BMgn006835	3304.34
BMgn003726	3284.49
BMgn000013	3210.32
BMgn002429	3204.41
BMgn000158	3189.72
BMgn010867	3187.43
BMgn006414	3158.13
BMgn007412	3008.47
BMgn004406	3001.73
BMgn007477	2998.22
BMgn009319	2995.48
BMgn006209	2978.2
BMgn009411	2600.59
BMgn002405	2542
BMgn013413	2508.34
BMgn015431	2507.11
BMgn012030	2507.02
BMgn007469	2488.09
BMgn001106	2434.52
BMgn012740	2381.16
BMgn006282	2175.52
BMgn006463	2167.16
BMgn015078	2148.62
BMgn016215	2116.26
BMgn003829	2058.6
BMgn012687	2031.2
BMgn003923	1986.88
BMgn003587	1907.08
BMgn017128	1903.88
BMgn009095	1878.14
BMgn002689	1820.82
BMgn011059	1721.69
BMgn000475	1678.4
BMgn002644	1675.46
BMgn005328	1674.56
BMgn009516	1628.87
BMgn015756	1576.27
BMgn005827	1556.58
BMgn008268	1517.3
BMgn013713	1493.4
BMgn015997	1492.53
BMgn006412	1436.88
BMgn000944	1434
BMgn015806	1430.98
BMgn005769	1412.14
BMgn012378	1375.86
BMgn007490	1339.03
BMgn003469	1301.34
BMgn003475	1281.9
BMgn010959	1230.11
BMgn006235	1222.93
BMgn008921	1220.21
BMgn011783	1214.75
BMgn000526	1210.53
BMgn011599	1182.78
BMgn006426	1120.45
BMgn004891	1103
BMgn000759	1074.63
BMgn014686	1063.56
BMgn010889	1050.65
BMgn001853	1047.2
BMgn000274	1038.53
BMgn007950	990.187
BMgn002164	961.589
BMgn003718	958.736
BMgn001821	881.454
BMgn012981	863.492
BMgn001860	855.979
BMgn003186	854.964
BMgn005648	852.09
BMgn009211	824.72
BMgn007043	815.849
BMgn007426	786.216
BMgn011768	780.418
BMgn004910	779.617
BMgn007586	777.723
BMgn012309	762.225
BMgn005831	750.532
BMgn015413	742.999
BMgn009249	735.083
BMgn004191	731.889
BMgn002570	703.187
BMgn011936	699.217
BMgn008962	694.474
BMgn002981	686.834
BMgn008955	686.391
BMgn006794	670.252
BMgn007684	670.132
BMgn001549	666.987
BMgn005861	660.539
BMgn006141	651.578
BMgn010684	631.652
BMgn002309	627.614
BMgn007637	627.272
BMgn006216	625.649
BMgn000776	623.667
BMgn015447	623.27
BMgn005289	621.639
BMgn000367	612.799
BMgn015733	600.96
BMgn013451	589.935
BMgn005576	589.517
BMgn013680	587.628
BMgn012904	584.825
BMgn003048	583.229
BMgn013511	575.579
BMgn015520	571.253
BMgn016641	565.697
BMgn007889	565.645
BMgn009132	565.37
BMgn007114	565.204
BMgn009701	555.611
BMgn010751	549.773
BMgn003669	545.031
BMgn013328	541.632
BMgn011742	539.313
BMgn008670	536.033
BMgn000804	524.677
BMgn016390	522.534
BMgn003339	520.974
BMgn001627	520.029
BMgn002493	515.667
BMgn000238	514.784
BMgn011504	513.924
BMgn009092	513.867
BMgn012153	512.223
BMgn013965	511.524
BMgn007061	508.272
BMgn005793	506.344
BMgn005550	499.475
BMgn001136	498.018
BMgn014862	497.845
BMgn011581	493.925
BMgn001107	489.107
BMgn005559	483.928
BMgn015414	482.593
BMgn004343	478.825
BMgn001828	476.072
BMgn013261	475.889
BMgn005577	474.68
BMgn008664	474.179
BMgn014796	470.11
BMgn012485	468.355
BMgn015518	467.134
BMgn014175	459.549
BMgn000672	451.974
BMgn016042	451.949
BMgn004231	445.848
BMgn001490	444.057
BMgn010130	439.543
BMgn006751	438.015
BMgn011253	431.562
BMgn007703	431.088
BMgn009131	430.316
BMgn009091	426.075
BMgn013574	417.697
BMgn006789	413.927
BMgn013464	411.875
BMgn011602	410.339
BMgn002814	406.822
BMgn002635	406.43
BMgn013778	395.084
BMgn012762	393.761
BMgn013812	392.36
BMgn011272	386.599
BMgn015360	385.128
BMgn011920	379.914
BMgn005409	377.39
BMgn004612	377.218
BMgn006704	374.994
BMgn010845	374.361
BMgn001582	373.848
BMgn010337	369.874
BMgn009698	369.054
BMgn006319	368.739
BMgn013777	368.718
BMgn004809	367.556
BMgn002504	367.408
BMgn005205	367.258
BMgn010423	367.163
BMgn006966	362.072
BMgn005493	359.564
BMgn000923	359.036
BMgn015080	358.977
BMgn015104	358.666
BMgn014224	358.159
BMgn001620	356.13
BMgn013267	345.322
BMgn006507	344.021
BMgn015329	343.755
BMgn012515	343.421
BMgn009704	342.873
BMgn008391	342.626
BMgn002569	341.062
BMgn001302	340.37
BMgn011068	339.038
BMgn011746	338.093
BMgn005347	336.542
BMgn004169	335.222
BMgn000132	334.163
BMgn004527	332.462
BMgn004847	331.627
BMgn017120	331.574
BMgn008682	330.699
BMgn004059	329.72
BMgn009763	329.063
BMgn000188	325.804
BMgn005832	324.254
BMgn008084	321.325
BMgn008780	320.924
BMgn009156	319.992
BMgn010588	316.689
BMgn011589	316.678
BMgn005012	315.046
BMgn003977	315.037
BMgn005511	312.893
BMgn006360	312.705
BMgn013228	310.256
BMgn003361	310.167
BMgn003695	308.389
BMgn011754	307.254
BMgn003544	307.187
BMgn009987	307.15
BMgn014932	306.65
BMgn003828	306.575
BMgn012674	305.411
BMgn002186	305.116
BMgn001119	299.86
BMgn016814	297.582
BMgn006115	297.568
BMgn010671	297.169
BMgn010541	296.965
BMgn015897	293.449
BMgn011713	293.198
BMgn007639	292.546
BMgn001593	292.137
BMgn007670	289.899
BMgn015089	289.614
BMgn012851	289.581
BMgn017044	288.427
BMgn013449	288.193
BMgn000457	288.021
BMgn013678	287.564
BMgn007303	286.033
BMgn005270	284.416
BMgn006154	281.354
BMgn017209	280.368
BMgn013201	277.201
BMgn016546	275.788
BMgn004661	275.349
BMgn003004	270.242
BMgn004331	270.036
BMgn015749	270.025
BMgn011696	269.879
BMgn010032	266.311
BMgn009790	266.06
BMgn006945	261.461
BMgn009365	260.791
BMgn010246	257.876
BMgn002915	256.416
BMgn001318	250.728
BMgn013798	247.648
BMgn008894	247.475
BMgn012437	246.58
BMgn012126	245.634
BMgn006260	243.693
BMgn011618	243.173
BMgn001301	242.408
BMgn015224	242.248
BMgn012373	240.435
BMgn006907	239.663
BMgn001395	236.203
BMgn001415	235.832
BMgn004592	235.614
BMgn010277	234.688
BMgn015453	234.608
BMgn012555	234.541
BMgn010881	233.793
BMgn012960	233.726
BMgn004789	230.074
BMgn007453	229.695
BMgn017330	229.136
BMgn000129	228.557
BMgn000104	228.474
BMgn012356	227.401
BMgn001460	227.397
BMgn003974	226.524
BMgn003221	226.514
BMgn012182	226.401
BMgn001842	225.934
BMgn010666	225.471
BMgn001926	223.821
BMgn008405	222.682
BMgn012032	221.88
BMgn002713	220.93
BMgn005011	220.893
BMgn001358	220.455
BMgn010520	220.26
BMgn004852	219.241
BMgn015016	218.697
BMgn000926	218.55
BMgn004510	216.888
BMgn001186	216.715
BMgn009182	216.432
BMgn011323	215.879
BMgn009571	215.299
BMgn000918	215.245
BMgn003597	214.941
BMgn003422	213.92
BMgn013566	213.753
BMgn002898	213.253
BMgn005115	212.435
BMgn006866	212.158
BMgn011507	212.098
BMgn015371	211.471
BMgn013633	210.949
BMgn017173	210.6
BMgn008847	210.426
BMgn006508	210.177
BMgn016787	209.016
BMgn004175	208.831
BMgn000715	207.992
BMgn007988	207.859
BMgn002455	207.537
BMgn004196	207.125
BMgn012240	204.093
BMgn006523	203.602
BMgn009685	202.749
BMgn002355	202.743
BMgn006022	202.72
BMgn005323	202.361
BMgn006092	200.014
BMgn007349	199.465
BMgn015430	198.942
BMgn013498	198.237
BMgn006160	197.657
BMgn011701	197.558
BMgn003584	197.306
BMgn009956	196.81
BMgn005461	196.298
BMgn007881	195.955
BMgn000107	195.825
BMgn004377	195.574
BMgn001876	195.436
BMgn009210	195.231
BMgn012772	194.321
BMgn009874	192.787
BMgn016085	192.157
BMgn010129	191.232
BMgn009760	190.551
BMgn000528	190.415
BMgn009504	190.12
BMgn005853	189.654
BMgn016312	189.501
BMgn007068	188.949
BMgn007728	188.539
BMgn008164	188.345
BMgn005413	188.182
BMgn011521	187.791
BMgn003493	187.131
BMgn001644	186.872
BMgn000947	186.424
BMgn001303	185.455
BMgn010739	185.403
BMgn005656	185.117
BMgn006376	184.897
BMgn003009	183.955
BMgn004573	182.57
BMgn013021	182.386
BMgn015592	182.343
BMgn013260	181.715
BMgn002013	181.629
BMgn007334	181.572
BMgn000903	181.102
BMgn012002	180.929
BMgn015631	180.903
BMgn015284	180.597
BMgn004009	180.222
BMgn006841	180.022
BMgn011927	180.013
BMgn013116	179.911
BMgn001790	179.795
BMgn007502	179.575
BMgn001611	179.547
BMgn007072	178.222
BMgn002582	178.098
BMgn002704	177.812
BMgn004037	177.153
BMgn003420	177.023
BMgn002461	176.581
BMgn003972	176.457
BMgn011809	175.117
BMgn010352	174.128
BMgn006944	173.848
BMgn012961	173.357
BMgn002416	173.238
BMgn009845	173.203
BMgn011096	172.859
BMgn010199	172.757
BMgn015972	172.538
BMgn011012	172.427
BMgn000201	171.829
BMgn001206	171.611
BMgn016539	170.758
BMgn011321	170.375
BMgn008521	169.689
BMgn004657	169.01
BMgn004940	168.821
BMgn011721	166.764
BMgn008226	166.677
BMgn003892	166.406
BMgn011819	166.111
BMgn002640	165.726
BMgn015417	165.615
BMgn007546	165.614
BMgn003459	165.58
BMgn010289	164.965
BMgn011144	164.282
BMgn009572	164.211
BMgn001352	163.968
BMgn016632	163.51
BMgn002984	163.499
BMgn000971	163.351
BMgn000714	163.229
BMgn004993	163.21
BMgn006263	161.905
BMgn004908	161.476
BMgn006083	161.398
BMgn011681	160.995
BMgn007601	159.463
BMgn009841	158.258
BMgn001126	158.18
BMgn003758	158.107
BMgn002880	157.756
BMgn001035	157.538
BMgn008688	157.175
BMgn004892	156.794
BMgn002930	156.136
BMgn001849	155.674
BMgn005465	155.556
BMgn016800	155.12
BMgn001307	155.019
BMgn016782	154.715
BMgn002906	154.661
BMgn015637	153.935
BMgn007841	153.896
BMgn012935	153.715
BMgn004822	153.689
BMgn005871	153.005
BMgn002783	152.982
BMgn006158	152.795
BMgn016587	152.682
BMgn017177	152.555
BMgn008768	152.427
BMgn009978	152.399
BMgn010673	151.99
BMgn013133	151.979
BMgn014981	151.442
BMgn004302	151.334
BMgn011577	151.278
BMgn008194	151.072
BMgn010471	150.856
BMgn016162	150.782
BMgn002594	150.33
BMgn009814	150.08
BMgn009012	149.669
BMgn014144	149.625
BMgn017131	148.894
BMgn006840	148.261
BMgn003398	148.196
BMgn009816	148.121
BMgn007723	147.677
BMgn016878	147.604
BMgn008312	147.566
BMgn004868	146.721
BMgn016482	146.37
BMgn014177	146.248
BMgn001194	145.968
BMgn012860	145.945
BMgn001437	145.549
BMgn002618	145.335
BMgn001943	144.846
BMgn002750	144.605
BMgn016674	144.494
BMgn016490	143.996
BMgn015145	143.756
BMgn007628	143.732
BMgn012029	143.718
BMgn016081	143.716
BMgn012872	143.392
BMgn013131	143.365
BMgn007630	143.241
BMgn011824	142.885
BMgn016060	142.87
BMgn014178	142.738
BMgn000897	141.612
BMgn007994	141.538
BMgn005628	141.509
BMgn015798	141.506
BMgn012512	141.091
BMgn013100	140.252
BMgn004675	140.197
BMgn006497	140.019
BMgn012428	139.949
BMgn005812	139.81
BMgn002241	139.663
BMgn000061	139.481
BMgn003966	139.371
BMgn017088	139.157
BMgn004932	139.055
BMgn013098	138.675
BMgn006588	138.561
BMgn012857	138.396
BMgn004013	138.001
BMgn006514	137.984
BMgn015000	137.766
BMgn008542	137.674
BMgn010419	137.382
BMgn005204	136.799
BMgn008425	136.771
BMgn005425	136.77
BMgn008864	136.258
BMgn008904	136.253
BMgn007971	135.93
BMgn011779	135.576
BMgn014105	135.368
BMgn010839	135.313
BMgn002675	135.31
BMgn015514	134.971
BMgn005475	134.695
BMgn002971	134.51
BMgn000476	134.264
BMgn011803	134.239
BMgn002543	134.223
BMgn017162	134.044
BMgn016406	134.038
BMgn000064	133.593
BMgn010100	133.341
BMgn003541	133.072
BMgn009684	132.902
BMgn000928	132.822
BMgn013096	132.743
BMgn011710	132.697
BMgn007267	132.359
BMgn010120	132.35
BMgn003338	132.303
BMgn005635	132.085
BMgn001525	131.965
BMgn006859	131.498
BMgn000292	131.304
BMgn006369	131.177
BMgn009021	130.993
BMgn013025	130.914
BMgn004376	130.478
BMgn017077	130.145
BMgn007824	129.93
BMgn007702	129.728
BMgn017207	129.61
BMgn011776	129.524
BMgn016333	129.338
BMgn000074	128.482
BMgn005127	128.002
BMgn002423	127.864
BMgn010406	127.66
BMgn001060	127.447
BMgn012510	126.923
BMgn010351	126.598
BMgn003225	126.552
BMgn003311	126.479
BMgn004898	126.397
BMgn006941	126.262
BMgn017312	126.091
BMgn009250	125.959
BMgn013996	125.871
BMgn013510	125.743
BMgn006603	125.695
BMgn009699	125.636
BMgn011646	125.6
BMgn000582	125.436
BMgn001474	125.427
BMgn007904	125.27
BMgn016754	124.891
BMgn016681	124.881
BMgn009515	124.78
BMgn003028	124.756
BMgn005826	124.632
BMgn016673	124.395
BMgn002685	124.317
BMgn006975	124.29
BMgn016498	123.936
BMgn011004	123.742
BMgn014624	123.517
BMgn004726	123.29
BMgn013717	123.141
BMgn011540	123.044
BMgn001236	122.909
BMgn015124	122.902
BMgn009607	122.852
BMgn013273	122.836
BMgn004688	122.254
BMgn014909	122.008
BMgn007079	121.972
BMgn013859	121.925
BMgn006809	121.394
BMgn012571	121.391
BMgn003178	121.062
BMgn005736	121.023
BMgn012192	121.021
BMgn008547	120.997
BMgn010102	120.969
BMgn016634	120.903
BMgn015001	120.747
BMgn009010	120.496
BMgn006846	120.107
BMgn009107	119.598
BMgn011473	119.393
BMgn004038	119.265
BMgn005535	118.765
BMgn012045	118.719
BMgn005455	118.118
BMgn006591	117.9
BMgn004992	117.361
BMgn012379	117.017
BMgn010976	116.94
BMgn009419	116.856
BMgn013235	116.789
BMgn011499	116.683
BMgn002209	116.407
BMgn010891	116.313
BMgn003924	116.289
BMgn015153	116.143
BMgn002004	115.859
BMgn001195	115.628
BMgn003656	115.47
BMgn015846	115.231
BMgn005994	115.225
BMgn009706	115.142
BMgn011117	114.728
BMgn015350	114.709
BMgn007258	114.22
BMgn010595	113.911
BMgn005392	113.862
BMgn009608	113.573
BMgn004091	113.376
BMgn011973	113.21
BMgn012239	112.995
BMgn015754	112.844
BMgn000559	112.71
BMgn010941	112.686
BMgn007111	112.554
BMgn012474	112.366
BMgn015953	112.169
BMgn011092	112.069
BMgn007935	112.068
BMgn008011	112.032
BMgn003681	111.999
BMgn013244	111.998
BMgn012952	111.945
BMgn007144	111.923
BMgn016055	111.711
BMgn000943	111.508
BMgn013971	111.497
BMgn003694	111.339
BMgn010262	110.767
BMgn011127	110.753
BMgn015609	110.609
BMgn006405	110.6
BMgn004524	110.579
BMgn006529	110.211
BMgn008568	110.122
BMgn014136	109.647
BMgn010489	109.566
BMgn009045	109.349
BMgn000990	109.095
BMgn015146	108.655
BMgn004445	108.617
BMgn007822	108.555
BMgn012004	108.22
BMgn005739	108.029
BMgn002340	107.727
BMgn003335	107.681
BMgn004824	107.483
BMgn011667	107.144
BMgn012203	106.907
BMgn003785	106.584
BMgn005439	106.555
BMgn005815	106.163
BMgn001097	105.877
BMgn016460	105.177
BMgn010723	105.092
BMgn015293	104.997
BMgn000167	104.849
BMgn001966	104.263
BMgn007470	104.157
BMgn000694	104.109
BMgn007039	103.938
BMgn005755	103.664
BMgn013634	103.34
BMgn000882	103.258
BMgn012870	103.241
BMgn003116	103.154
BMgn003070	103.146
BMgn011870	102.935
BMgn011460	102.808
BMgn008556	102.656
BMgn008595	102.512
BMgn013088	102.417
BMgn005796	102.149
BMgn001232	102.113
BMgn007656	102.004
BMgn009731	101.978
BMgn016195	101.513
BMgn010396	101.281
BMgn002406	101.275
BMgn005250	101.226
BMgn017284	101.054
BMgn015040	100.764
BMgn013923	100.409
BMgn015336	100.386
BMgn013343	100.182
BMgn016990	100.144
BMgn007192	100.02
BMgn011584	99.908
BMgn006940	99.5612
BMgn003267	99.4735
BMgn015643	99.3406
BMgn015807	99.2987
BMgn002462	99.1658
BMgn008663	98.8516
BMgn000894	98.7012
BMgn003367	98.6611
BMgn005560	98.6456
BMgn000664	98.2344
BMgn004782	98.1744
BMgn015837	98.1476
BMgn003463	97.7396
BMgn008199	97.4776
BMgn003212	97.331
BMgn001252	97.1478
BMgn005068	97.1312
BMgn011849	96.9575
BMgn004414	96.8705
BMgn006063	96.7215
BMgn004838	96.6025
BMgn000924	96.4607
BMgn003637	95.8732
BMgn008699	95.7397
BMgn017301	95.2513
BMgn008392	95.2497
BMgn010825	95.2253
BMgn010113	95.1876
BMgn007013	95.1856
BMgn007268	95.1679
BMgn016522	95.0616
BMgn002508	94.8527
BMgn011658	94.7279
BMgn001070	94.5229
BMgn008551	94.2203
BMgn000312	94.1844
BMgn011237	94.1628
BMgn016088	94.1212
BMgn010906	93.9082
BMgn007263	93.8943
BMgn014902	93.4578
BMgn013230	93.3922
BMgn016148	93.3713
BMgn006709	93.3652
BMgn013884	93.1463
BMgn016783	93.1384
BMgn007418	93.1303
BMgn005788	93.0144
BMgn015694	92.9682
BMgn004276	92.902
BMgn003112	92.8519
BMgn013898	92.7747
BMgn007332	92.7074
BMgn003238	92.4326
BMgn003508	92.1176
BMgn001406	91.8673
BMgn006415	91.8659
BMgn011788	91.8011
BMgn007699	91.6661
BMgn000119	91.6466
BMgn003153	91.5548
BMgn002053	91.4198
BMgn001511	91.3895
BMgn004061	91.3532
BMgn013072	90.9558
BMgn004454	90.9516
BMgn010620	90.8339
BMgn003840	90.7817
BMgn005530	90.4653
BMgn013806	90.2898
BMgn002953	90.2331
BMgn002295	89.9754
BMgn009374	89.8147
BMgn003725	89.8134
BMgn009911	89.6582
BMgn010223	89.5081
BMgn012999	88.9961
BMgn004875	88.8736
BMgn000381	88.6244
BMgn005499	88.0531
BMgn016815	87.9212
BMgn015996	87.8502
BMgn000710	87.8195
BMgn014876	87.8083
BMgn007681	87.5166
BMgn008531	87.3173
BMgn004501	87.2516
BMgn011493	87.1213
BMgn013536	87.095
BMgn015079	87.0858
BMgn007118	87.0829
BMgn007168	86.9943
BMgn007720	86.9911
BMgn016034	86.8693
BMgn008021	86.745
BMgn003985	86.5291
BMgn005159	86.2734
BMgn012151	86.1938
BMgn013960	85.8443
BMgn007879	85.773
BMgn008930	85.6034
BMgn003301	85.4926
BMgn011438	85.4585
BMgn003428	85.3994
BMgn001711	85.1571
BMgn006401	85.0977
BMgn005301	84.7148
BMgn010574	84.6803
BMgn011593	84.6642
BMgn010725	84.6293
BMgn003520	84.593
BMgn009002	84.5128
BMgn004511	84.4815
BMgn010635	84.3857
BMgn012127	84.1957
BMgn005335	84.1802
BMgn004413	84.1424
BMgn007852	83.8997
BMgn016825	83.867
BMgn008295	83.8424
BMgn008251	83.7713
BMgn007410	83.7362
BMgn005452	83.6877
BMgn015531	83.5867
BMgn006850	83.4905
BMgn013839	83.1345
BMgn002707	83.0929
BMgn003196	83.0821
BMgn007207	83.08
BMgn001482	82.8142
BMgn014856	82.7979
BMgn000231	82.7136
BMgn003466	82.6971
BMgn008294	82.6516
BMgn007360	82.6181
BMgn004164	82.6043
BMgn004607	82.5413
BMgn000925	82.4855
BMgn007783	82.3106
BMgn001847	82.2748
BMgn011399	82.1165
BMgn013063	82.1093
BMgn014563	82.0367
BMgn003165	81.9372
BMgn003001	81.9344
BMgn009992	81.846
BMgn005592	81.7518
BMgn016049	81.6197
BMgn008350	81.5187
BMgn016382	81.4883
BMgn009755	81.4052
BMgn012705	81.3947
BMgn007892	81.319
BMgn014185	81.2152
BMgn016231	81.1771
BMgn006193	80.9679
BMgn010864	80.9377
BMgn008493	80.9181
BMgn008321	80.863
BMgn005451	80.5911
BMgn012690	80.4301
BMgn009496	80.2584
BMgn005116	79.9355
BMgn007863	79.8975
BMgn011674	79.8327
BMgn002310	79.8246
BMgn010324	79.6957
BMgn015705	79.4849
BMgn011916	79.3717
BMgn004884	79.3513
BMgn013801	79.0366
BMgn012888	78.962
BMgn009830	78.9511
BMgn006085	78.8705
BMgn005498	78.4203
BMgn008192	78.4058
BMgn008828	78.3906
BMgn015711	78.2785
BMgn015481	78.2165
BMgn011982	78.0745
BMgn009983	77.8662
BMgn009671	77.756
BMgn002398	77.5648
BMgn003833	77.3428
BMgn006828	77.2696
BMgn009794	77.0076
BMgn015419	76.9878
BMgn011672	76.7448
BMgn002049	76.7413
BMgn007731	76.6887
BMgn007977	76.4196
BMgn004162	76.2806
BMgn015310	76.2192
BMgn004250	76.2111
BMgn012298	76.1579
BMgn014639	76.1068
BMgn012954	75.4568
BMgn001223	75.2615
BMgn005441	75.1937
BMgn011877	75.0826
BMgn014874	75.0304
BMgn015741	74.9361
BMgn009004	74.9174
BMgn009967	74.7694
BMgn009726	74.6415
BMgn007790	74.6332
BMgn010475	74.4165
BMgn008525	74.4137
BMgn012200	74.3339
BMgn013620	74.3129
BMgn011771	74.3085
BMgn003395	74.2381
BMgn010068	74.0695
BMgn009052	74.0376
BMgn005101	73.8793
BMgn012243	73.8747
BMgn012774	73.8745
BMgn003564	73.7936
BMgn004776	73.5308
BMgn001032	73.3905
BMgn010658	73.373
BMgn009395	73.3704
BMgn016901	73.2665
BMgn009795	73.2563
BMgn006167	73.2372
BMgn010756	73.1586
BMgn002024	73.1094
BMgn007817	73.1042
BMgn005341	73.0847
BMgn015839	72.9983
BMgn009072	72.9351
BMgn011019	72.8889
BMgn006200	72.8461
BMgn007732	72.7726
BMgn008010	72.7619
BMgn000390	72.6613
BMgn012053	72.376
BMgn012709	72.3478
BMgn013598	72.3365
BMgn006196	72.0806
BMgn000175	71.9597
BMgn015305	71.8796
BMgn009968	71.8552
BMgn001213	71.7735
BMgn003155	71.6626
BMgn004888	71.3622
BMgn004525	71.2904
BMgn010998	71.1479
BMgn001278	71.1341
BMgn006215	71.0746
BMgn013963	71.032
BMgn014851	70.9348
BMgn001558	70.8331
BMgn000484	70.8257
BMgn007738	70.785
BMgn016430	70.7505
BMgn016004	70.6743
BMgn001037	70.5763
BMgn000029	70.5224
BMgn001175	70.4734
BMgn016116	70.2726
BMgn015276	69.9869
BMgn009799	69.9659
BMgn013504	69.9371
BMgn007119	69.8947
BMgn001731	69.8909
BMgn006344	69.6823
BMgn005518	69.5422
BMgn003255	69.4632
BMgn016998	69.3809
BMgn012211	69.3773
BMgn007092	69.2738
BMgn008095	69.2681
BMgn012304	69.2233
BMgn012931	69.2204
BMgn001551	69.2053
BMgn000155	69.1397
BMgn016302	69.1252
BMgn010229	69.113
BMgn015466	69.1078
BMgn010794	69.085
BMgn015100	69.0666
BMgn006589	69.0135
BMgn002967	69.0003
BMgn008887	68.9886
BMgn003894	68.9735
BMgn002792	68.9465
BMgn012537	68.8854
BMgn010657	68.4414
BMgn005372	68.4341
BMgn014403	68.427
BMgn004528	68.4214
BMgn007642	68.4165
BMgn004531	68.274
BMgn008728	68.2219
BMgn002920	68.1853
BMgn010198	68.159
BMgn000072	67.8286
BMgn012128	67.7816
BMgn003066	67.7731
BMgn011477	67.7729
BMgn000733	67.7393
BMgn007512	67.6195
BMgn006816	67.5493
BMgn008088	67.54
BMgn008998	67.4257
BMgn014706	67.2231
BMgn007517	67.2
BMgn000803	67.0392
BMgn003596	66.9684
BMgn016933	66.8124
BMgn008501	66.8029
BMgn002714	66.6687
BMgn012669	66.6222
BMgn000320	66.5808
BMgn006836	66.4525
BMgn009817	66.4348
BMgn017026	66.2915
BMgn015149	66.2825
BMgn010586	66.1086
BMgn005144	66.041
BMgn010656	65.9958
BMgn015515	65.6156
BMgn005637	65.5655
BMgn005162	65.4207
BMgn000777	65.163
BMgn010528	65.109
BMgn012910	65.0719
BMgn011505	65.0699
BMgn000805	65.0337
BMgn012820	65.0069
BMgn014943	64.9838
BMgn004265	64.9439
BMgn013544	64.9415
BMgn014122	64.8467
BMgn011307	64.7806
BMgn012122	64.7597
BMgn010164	64.7078
BMgn008427	64.6867
BMgn006795	64.5992
BMgn011029	64.5593
BMgn005023	64.5068
BMgn016529	64.4966
BMgn002453	64.4793
BMgn003643	64.437
BMgn011846	64.3872
BMgn005169	64.3587
BMgn009096	64.3148
BMgn013765	64.2559
BMgn011014	64.1553
BMgn002559	64.1142
BMgn010173	63.9692
BMgn011180	63.9155
BMgn006856	63.8982
BMgn002987	63.8884
BMgn016454	63.7254
BMgn007594	63.7051
BMgn008878	63.697
BMgn007209	63.6366
BMgn015177	63.527
BMgn011412	63.3049
BMgn000086	63.2089
BMgn007712	63.1752
BMgn007257	63.1555
BMgn011502	63.0944
BMgn006932	63.0298
BMgn012839	62.9595
BMgn007921	62.9387
BMgn004112	62.9227
BMgn008725	62.8943
BMgn008706	62.6677
BMgn012944	62.6658
BMgn016123	62.6436
BMgn014123	62.6283
BMgn013999	62.5365
BMgn011337	62.4936
BMgn017324	62.4504
BMgn001883	62.4119
BMgn013703	62.4045
BMgn012983	62.3875
BMgn007657	62.3127
BMgn014963	62.2099
BMgn015198	62.155
BMgn011619	62.0886
BMgn001402	62.0744
BMgn017075	62.0373
BMgn012905	62.0331
BMgn009963	62.0255
BMgn002894	62.012
BMgn008812	61.9708
BMgn005322	61.8774
BMgn003101	61.8526
BMgn002610	61.8505
BMgn016008	61.7884
BMgn005119	61.6237
BMgn004833	61.5827
BMgn003583	61.5271
BMgn001950	61.4493
BMgn008507	61.435
BMgn003030	61.4054
BMgn017165	61.2622
BMgn005658	61.202
BMgn016776	61.1974
BMgn014869	61.1225
BMgn012472	61.0954
BMgn015069	61.0422
BMgn000300	61.01
BMgn004315	60.9941
BMgn001132	60.9261
BMgn002639	60.8519
BMgn005593	60.5542
BMgn005126	60.5422
BMgn017019	60.5199
BMgn002346	60.4762
BMgn015882	60.4619
BMgn012936	60.3796
BMgn007297	60.2746
BMgn010744	60.2271
BMgn007734	60.1552
BMgn010527	60.1474
BMgn000921	60.0684
BMgn010668	59.979
BMgn005944	59.9123
BMgn016774	59.8773
BMgn011357	59.7867
BMgn010780	59.7243
BMgn008327	59.7116
BMgn009971	59.6186
BMgn005315	59.5855
BMgn009234	59.5855
BMgn010178	59.5132
BMgn000412	59.4835
BMgn006192	59.2589
BMgn011964	59.1139
BMgn009129	59.1122
BMgn008579	59.0678
BMgn016948	59.0288
BMgn012348	59.0172
BMgn006653	58.9195
BMgn009680	58.914
BMgn011792	58.8822
BMgn002400	58.778
BMgn008563	58.6954
BMgn010057	58.6452
BMgn011983	58.5783
BMgn000793	58.5646
BMgn003815	58.516
BMgn004060	58.3472
BMgn003973	58.3351
BMgn001732	58.2546
BMgn016476	58.1975
BMgn006477	58.1163
BMgn004219	57.9991
BMgn009399	57.7851
BMgn000474	57.7649
BMgn001073	57.6823
BMgn012125	57.5525
BMgn009370	57.5482
BMgn012118	57.5104
BMgn005900	57.416
BMgn005249	57.339
BMgn009674	57.1989
BMgn004933	57.1818
BMgn004743	57.173
BMgn006013	57.136
BMgn013644	57.0477
BMgn010016	57.0368
BMgn015382	56.993
BMgn005503	56.9687
BMgn005536	56.9053
BMgn003203	56.8253
BMgn010222	56.7484
BMgn000622	56.6941
BMgn002648	56.6839
BMgn001500	56.6426
BMgn005395	56.5824
BMgn011687	56.5664
BMgn001241	56.4452
BMgn012809	56.2569
BMgn000288	56.2013
BMgn005949	56.1035
BMgn006825	56.0293
BMgn013439	55.9879
BMgn002680	55.9759
BMgn009650	55.9588
BMgn010790	55.9579
BMgn008899	55.859
BMgn008301	55.8512
BMgn011770	55.8454
BMgn008284	55.7635
BMgn002016	55.7364
BMgn016656	55.6992
BMgn008292	55.654
BMgn012710	55.6421
BMgn007450	55.5722
BMgn001218	55.5171
BMgn010053	55.4095
BMgn014717	55.3871
BMgn016337	55.3547
BMgn011899	55.3224
BMgn005798	55.274
BMgn013623	55.1724
BMgn002638	55.1718
BMgn001411	55.1203
BMgn000399	55.0983
BMgn008879	55.0762
BMgn006323	55.0516
BMgn006878	55.047
BMgn008848	54.9051
BMgn006225	54.887
BMgn004909	54.849
BMgn009323	54.8312
BMgn001867	54.8288
BMgn014705	54.8198
BMgn016595	54.8031
BMgn005251	54.7979
BMgn007343	54.7815
BMgn009981	54.6639
BMgn010664	54.6189
BMgn005590	54.5928
BMgn003158	54.5488
BMgn014979	54.47
BMgn017121	54.4348
BMgn001956	54.3822
BMgn013853	54.3802
BMgn010775	54.3325
BMgn007103	54.2405
BMgn016330	54.2095
BMgn003018	54.181
BMgn005672	54.16
BMgn000114	54.1499
BMgn013054	54.1475
BMgn001609	54.1464
BMgn006959	54.0596
BMgn000496	53.9262
BMgn001386	53.9124
BMgn002376	53.8979
BMgn013614	53.8452
BMgn015460	53.8105
BMgn002342	53.7813
BMgn006151	53.7749
BMgn002219	53.7183
BMgn009329	53.6982
BMgn009576	53.6387
BMgn002439	53.6201
BMgn011871	53.5841
BMgn008238	53.5736
BMgn007536	53.5177
BMgn016946	53.5147
BMgn007460	53.502
BMgn005564	53.5003
BMgn006173	53.479
BMgn001830	53.4541
BMgn008650	53.2472
BMgn011994	53.2103
BMgn003702	53.1104
BMgn012955	52.9867
BMgn011631	52.9596
BMgn001459	52.9206
BMgn006735	52.9174
BMgn016614	52.8517
BMgn016627	52.7806
BMgn005659	52.766
BMgn014269	52.7514
BMgn010163	52.7373
BMgn004540	52.6956
BMgn015958	52.6177
BMgn006047	52.6083
BMgn015008	52.6033
BMgn003020	52.5606
BMgn015847	52.5302
BMgn007304	52.4666
BMgn007110	52.4643
BMgn003464	52.4321
BMgn008554	52.422
BMgn011009	52.3797
BMgn007845	52.3273
BMgn003474	52.1532
BMgn006265	52.1402
BMgn003319	52.1329
BMgn006091	52.0317
BMgn011852	52.0137
BMgn016305	51.9887
BMgn009118	51.9656
BMgn013805	51.9475
BMgn004850	51.8859
BMgn006208	51.8761
BMgn000819	51.8561
BMgn012982	51.854
BMgn008619	51.8381
BMgn006655	51.8243
BMgn011510	51.7525
BMgn007942	51.7275
BMgn003991	51.685
BMgn001868	51.6494
BMgn013852	51.5832
BMgn007448	51.583
BMgn008090	51.5679
BMgn016804	51.4974
BMgn007159	51.4774
BMgn015990	51.3842
BMgn008150	51.3708
BMgn013348	51.3629
BMgn000937	51.3099
BMgn006583	51.2519
BMgn000991	51.2094
BMgn001147	51.0814
BMgn005924	51.0711
BMgn003647	51.0564
BMgn003704	51.0527
BMgn001805	50.9967
BMgn009934	50.9274
BMgn002538	50.9075
BMgn004980	50.7936
BMgn010538	50.766
BMgn010930	50.7513
BMgn003652	50.6757
BMgn010309	50.6192
BMgn003655	50.5903
BMgn010325	50.5244
BMgn005434	50.5086
BMgn006108	50.4871
BMgn001542	50.4804
BMgn006574	50.4788
BMgn011651	50.4235
BMgn002492	50.3915
BMgn011915	50.3462
BMgn003727	50.3105
BMgn006536	50.2981
BMgn007778	50.2678
BMgn000931	50.1986
BMgn012012	50.1535
BMgn001536	50.0971
BMgn001546	50.0589
BMgn000177	50.0559
BMgn002790	50.0437
BMgn004889	49.993
BMgn015699	49.9599
BMgn007875	49.9284
BMgn002360	49.9176
BMgn016160	49.902
BMgn007082	49.8651
BMgn012903	49.7964
BMgn017166	49.7478
BMgn006162	49.7454
BMgn011756	49.633
BMgn001921	49.5848
BMgn009980	49.5297
BMgn000647	49.5284
BMgn011628	49.5092
BMgn015139	49.4428
BMgn002263	49.4131
BMgn005158	49.4018
BMgn005469	49.2873
BMgn001115	49.2802
BMgn008873	49.2761
BMgn015792	49.2313
BMgn013514	49.2239
BMgn001209	49.1845
BMgn008074	49.1406
BMgn011606	49.1185
BMgn007299	49.0156
BMgn008006	48.9973
BMgn001643	48.943
BMgn007895	48.9239
BMgn007962	48.9005
BMgn009103	48.8522
BMgn015689	48.8446
BMgn002548	48.8437
BMgn007779	48.8281
BMgn010365	48.7156
BMgn015429	48.7125
BMgn011621	48.6876
BMgn005216	48.6749
BMgn005999	48.6693
BMgn015788	48.5995
BMgn011978	48.5568
BMgn015980	48.4621
BMgn006539	48.4535
BMgn012554	48.4481
BMgn003468	48.3877
BMgn001708	48.3548
BMgn000316	48.3025
BMgn005076	48.2898
BMgn010066	48.2333
BMgn013895	48.2086
BMgn012568	48.1779
BMgn005035	48.1691
BMgn007500	48.1544
BMgn012013	48.1359
BMgn007965	48.1089
BMgn006543	47.9531
BMgn007488	47.8986
BMgn002470	47.7958
BMgn007005	47.7657
BMgn008612	47.7567
BMgn011196	47.6929
BMgn006357	47.6539
BMgn016150	47.5428
BMgn006531	47.4475
BMgn004221	47.4126
BMgn004983	47.4107
BMgn010231	47.4063
BMgn012459	47.4031
BMgn006161	47.3957
BMgn016275	47.3946
BMgn009322	47.3908
BMgn005852	47.3448
BMgn000608	47.311
BMgn005828	47.288
BMgn017144	47.2878
BMgn007941	47.2614
BMgn001751	47.2296
BMgn002809	47.1957
BMgn005438	47.1827
BMgn006634	47.1438
BMgn004309	47.0373
BMgn012329	46.9363
BMgn001645	46.9198
BMgn016222	46.8607
BMgn011087	46.8298
BMgn015050	46.8212
BMgn007796	46.8075
BMgn003184	46.6121
BMgn008048	46.5206
BMgn004596	46.5099
BMgn015971	46.437
BMgn006865	46.4101
BMgn015183	46.309
BMgn002485	46.2229
BMgn003171	46.1959
BMgn001464	46.1832
BMgn003402	46.0852
BMgn000683	46.0778
BMgn014852	46.0556
BMgn013358	46.0425
BMgn001664	46.0211
BMgn007658	46.0186
BMgn007909	45.8845
BMgn011131	45.8594
BMgn016997	45.8535
BMgn007205	45.8522
BMgn008737	45.8426
BMgn011143	45.8029
BMgn006257	45.767
BMgn015632	45.7472
BMgn003609	45.7377
BMgn009099	45.7346
BMgn006243	45.7074
BMgn011865	45.642
BMgn012963	45.5729
BMgn008520	45.5607
BMgn008445	45.545
BMgn002317	45.5099
BMgn016592	45.4196
BMgn008846	45.4069
BMgn005814	45.4061
BMgn007326	45.3583
BMgn001829	45.3395
BMgn002359	45.2748
BMgn016721	45.2578
BMgn000383	45.1277
BMgn015503	45.1062
BMgn003259	45.0759
BMgn008538	45.0347
BMgn001239	45.0208
BMgn010260	44.9758
BMgn007951	44.8665
BMgn005391	44.8568
BMgn006275	44.8186
BMgn002980	44.7905
BMgn011246	44.7565
BMgn000305	44.6488
BMgn013070	44.6411
BMgn003560	44.6169
BMgn005504	44.6169
BMgn016748	44.6049
BMgn008992	44.5988
BMgn001870	44.5665
BMgn013032	44.5176
BMgn012505	44.5137
BMgn007689	44.5008
BMgn012323	44.4783
BMgn009878	44.4554
BMgn001806	44.393
BMgn012299	44.3843
BMgn005752	44.383
BMgn007940	44.3408
BMgn009236	44.316
BMgn006981	44.3008
BMgn011450	44.2443
BMgn007649	44.163
BMgn010943	44.1361
BMgn012873	44.1269
BMgn001767	44.0972
BMgn016053	44.0235
BMgn010381	43.9671
BMgn004666	43.9294
BMgn001042	43.9127
BMgn004626	43.8272
BMgn014690	43.8269
BMgn014985	43.7658
BMgn000679	43.7633
BMgn011794	43.7484
BMgn007041	43.7386
BMgn006121	43.7318
BMgn015957	43.6608
BMgn008965	43.6086
BMgn001208	43.5924
BMgn002363	43.569
BMgn010245	43.5662
BMgn007849	43.527
BMgn003327	43.5228
BMgn003959	43.5073
BMgn005131	43.5013
BMgn012852	43.4975
BMgn010999	43.4949
BMgn010225	43.4868
BMgn008829	43.4193
BMgn004008	43.4179
BMgn016122	43.4114
BMgn014093	43.3825
BMgn003151	43.3766
BMgn012330	43.3673
BMgn003391	43.3644
BMgn002619	43.3568
BMgn010197	43.3195
BMgn011061	43.258
BMgn016130	43.2554
BMgn006620	43.2506
BMgn011785	43.2476
BMgn015562	43.2313
BMgn016944	43.2266
BMgn009976	43.1445
BMgn001893	43.132
BMgn012984	43.1214
BMgn007946	43.1169
BMgn010150	43.1132
BMgn009851	43.1113
BMgn017189	43.0609
BMgn012517	43.0389
BMgn005939	42.9986
BMgn008214	42.9911
BMgn008886	42.9869
BMgn013317	42.9677
BMgn009041	42.904
BMgn001688	42.8656
BMgn002858	42.8493
BMgn008494	42.8405
BMgn009969	42.8284
BMgn016535	42.7807
BMgn015582	42.768
BMgn010437	42.6772
BMgn008900	42.5608
BMgn001928	42.5472
BMgn001606	42.3871
BMgn006721	42.3813
BMgn005460	42.3718
BMgn000977	42.3644
BMgn013918	42.3534
BMgn002444	42.3213
BMgn001509	42.2899
BMgn009280	42.2846
BMgn006222	42.2782
BMgn006832	42.2711
BMgn011509	42.2592
BMgn007640	42.2589
BMgn015545	42.2237
BMgn003181	42.2071
BMgn010431	42.1857
BMgn012569	42.1775
BMgn005797	42.168
BMgn009974	42.153
BMgn008066	42.1401
BMgn014182	42.1366
BMgn002829	42.1035
BMgn010972	42.0516
BMgn012046	42.0487
BMgn000627	42.0471
BMgn002862	42.0428
BMgn003389	41.9747
BMgn016048	41.9009
BMgn007120	41.8943
BMgn009941	41.8848
BMgn011629	41.8791
BMgn010621	41.8191
BMgn000874	41.7541
BMgn012985	41.7076
BMgn004913	41.6775
BMgn007869	41.6557
BMgn000154	41.6244
BMgn008477	41.6237
BMgn004227	41.5905
BMgn006802	41.5781
BMgn006822	41.5724
BMgn013010	41.5392
BMgn012093	41.5309
BMgn010258	41.5164
BMgn005931	41.5161
BMgn004494	41.5005
BMgn002681	41.4474
BMgn013768	41.4393
BMgn012670	41.4283
BMgn001258	41.4221
BMgn001537	41.4219
BMgn001841	41.4082
BMgn002684	41.3234
BMgn002115	41.3181
BMgn004745	41.2922
BMgn009104	41.2906
BMgn001081	41.2875
BMgn001431	41.2148
BMgn003521	41.1918
BMgn013011	41.1639
BMgn016349	41.1555
BMgn001825	41.1355
BMgn010485	41.1223
BMgn001197	41.1108
BMgn012560	41.1028
BMgn006474	41.0828
BMgn014815	41.0633
BMgn003485	41.0067
BMgn000629	40.9922
BMgn007408	40.9806
BMgn000473	40.952
BMgn002501	40.9339
BMgn012036	40.93
BMgn012703	40.904
BMgn006779	40.8717
BMgn002660	40.8717
BMgn012934	40.8519
BMgn016824	40.8477
BMgn004039	40.758
BMgn002654	40.7405
BMgn017112	40.7371
BMgn013112	40.6807
BMgn008871	40.6542
BMgn003872	40.6247
BMgn001084	40.6082
BMgn000120	40.5689
BMgn013811	40.5434
BMgn011342	40.5338
BMgn012159	40.5336
BMgn011296	40.5002
BMgn015900	40.4542
BMgn013508	40.3878
BMgn008966	40.3814
BMgn012481	40.3813
BMgn006868	40.3599
BMgn001253	40.3054
BMgn015286	40.2109
BMgn005352	40.0856
BMgn016278	40.068
BMgn006861	40.0602
BMgn003671	40.0264
BMgn000121	39.9962
BMgn009121	39.9789
BMgn007466	39.9562
BMgn005040	39.9469
BMgn000366	39.9123
BMgn011689	39.8212
BMgn005992	39.7817
BMgn008590	39.7204
BMgn001447	39.7169
BMgn009397	39.7132
BMgn006777	39.6935
BMgn008564	39.6886
BMgn010539	39.5656
BMgn015757	39.5515
BMgn005287	39.5135
BMgn011626	39.4702
BMgn017150	39.4601
BMgn016786	39.4538
BMgn011782	39.4387
BMgn015439	39.4376
BMgn016725	39.4335
BMgn015073	39.4314
BMgn010407	39.4286
BMgn016812	39.4266
BMgn010802	39.4211
BMgn006191	39.4041
BMgn000788	39.3798
BMgn009828	39.3704
BMgn006796	39.3635
BMgn002818	39.3409
BMgn002460	39.3294
BMgn011867	39.3249
BMgn011839	39.3071
BMgn017335	39.2872
BMgn005466	39.2754
BMgn002609	39.2656
BMgn008230	39.2602
BMgn011210	39.2447
BMgn009307	39.24
BMgn013589	39.2328
BMgn012523	39.196
BMgn006462	39.1399
BMgn005426	39.1307
BMgn003042	39.1214
BMgn007200	39.1058
BMgn000062	39.0821
BMgn000722	39.0191
BMgn014133	39.0172
BMgn017138	38.992
BMgn010745	38.9723
BMgn000940	38.963
BMgn013785	38.9533
BMgn016737	38.9317
BMgn016137	38.8158
BMgn004927	38.7794
BMgn009237	38.772
BMgn003685	38.7448
BMgn000118	38.7361
BMgn011294	38.6964
BMgn016820	38.6489
BMgn013234	38.6265
BMgn009955	38.6227
BMgn003198	38.5995
BMgn006459	38.5936
BMgn016389	38.5104
BMgn015521	38.4688
BMgn016811	38.4568
BMgn004416	38.4186
BMgn003767	38.4144
BMgn001929	38.3389
BMgn011604	38.3151
BMgn016655	38.3049
BMgn010435	38.3042
BMgn007501	38.297
BMgn016193	38.2786
BMgn016143	38.2662
BMgn012135	38.2361
BMgn004381	38.1792
BMgn011841	38.1791
BMgn004056	38.1422
BMgn001733	38.1097
BMgn003394	38.0419
BMgn007019	38.0308
BMgn001898	38.0111
BMgn008412	37.9875
BMgn009771	37.9838
BMgn006178	37.9361
BMgn002223	37.8947
BMgn002152	37.7655
BMgn007266	37.7418
BMgn013493	37.7415
BMgn011753	37.7407
BMgn002243	37.7308
BMgn015125	37.7191
BMgn002188	37.7136
BMgn001262	37.6812
BMgn009372	37.6326
BMgn000350	37.6313
BMgn010154	37.6214
BMgn000102	37.6161
BMgn006920	37.5983
BMgn004278	37.5608
BMgn004687	37.5594
BMgn011772	37.5557
BMgn017285	37.5443
BMgn015654	37.5396
BMgn001220	37.512
BMgn004307	37.4923
BMgn007428	37.4482
BMgn012975	37.4419
BMgn007604	37.411
BMgn013840	37.3566
BMgn016931	37.3521
BMgn012037	37.3327
BMgn003202	37.3079
BMgn012057	37.284
BMgn007582	37.2823
BMgn006199	37.267
BMgn013676	37.2524
BMgn004984	37.2429
BMgn009138	37.2403
BMgn000068	37.1992
BMgn013506	37.1935
BMgn015917	37.1913
BMgn003027	37.1908
BMgn008778	37.1607
BMgn001123	37.1093
BMgn012743	37.1076
BMgn005506	37.1006
BMgn004109	37.0951
BMgn011427	37.0586
BMgn000233	37.0415
BMgn004099	37.0402
BMgn015229	36.9997
BMgn000758	36.9675
BMgn007090	36.9559
BMgn001036	36.9262
BMgn001468	36.8526
BMgn005615	36.8519
BMgn001054	36.8504
BMgn004102	36.8298
BMgn010387	36.8294
BMgn005485	36.7823
BMgn010577	36.7768
BMgn000488	36.7571
BMgn010801	36.749
BMgn011013	36.7303
BMgn007211	36.7026
BMgn011822	36.6762
BMgn016536	36.632
BMgn001918	36.6195
BMgn001103	36.6126
BMgn005650	36.5818
BMgn002659	36.5376
BMgn001170	36.5292
BMgn003742	36.5173
BMgn005895	36.5114
BMgn007735	36.5073
BMgn013497	36.48
BMgn000103	36.4705
BMgn004498	36.4469
BMgn012047	36.4324
BMgn014884	36.4188
BMgn001477	36.3903
BMgn005841	36.3874
BMgn005319	36.3541
BMgn014118	36.3517
BMgn002800	36.35
BMgn008133	36.3259
BMgn003294	36.2906
BMgn006608	36.2727
BMgn007064	36.2568
BMgn012673	36.2351
BMgn001940	36.2168
BMgn006045	36.1931
BMgn005687	36.1854
BMgn006518	36.1791
BMgn003336	36.1755
BMgn012563	36.159
BMgn006100	36.1578
BMgn005975	36.1519
BMgn009469	36.1511
BMgn001174	36.1425
BMgn001143	36.134
BMgn012117	36.1275
BMgn010593	36.1175
BMgn003362	36.1011
BMgn003909	36.0915
BMgn002183	36.0635
BMgn008291	36.0547
BMgn007482	36.0434
BMgn015396	36.0382
BMgn000324	36.0096
BMgn011872	35.9833
BMgn007794	35.8801
BMgn001538	35.8778
BMgn016759	35.8738
BMgn007574	35.8726
BMgn015492	35.8626
BMgn011103	35.8577
BMgn014928	35.8549
BMgn013361	35.8542
BMgn010477	35.8282
BMgn011469	35.8092
BMgn012152	35.7638
BMgn000106	35.757
BMgn015541	35.7294
BMgn001044	35.6974
BMgn004846	35.6899
BMgn008306	35.6835
BMgn000958	35.6458
BMgn008248	35.6273
BMgn003480	35.6184
BMgn016995	35.5931
BMgn008983	35.5561
BMgn000995	35.5224
BMgn007842	35.521
BMgn011711	35.4942
BMgn005544	35.489
BMgn016310	35.4752
BMgn015019	35.4597
BMgn002837	35.4022
BMgn006359	35.3809
BMgn012753	35.3509
BMgn015662	35.3503
BMgn005436	35.333
BMgn000626	35.324
BMgn003667	35.3192
BMgn016628	35.278
BMgn000549	35.2772
BMgn010282	35.2621
BMgn011743	35.2508
BMgn007513	35.2433
[truncated: 6,703 more rows]

## Sheet: Essential genes in SG
Gene ID	Expression
BMgn005111	97291.7
BMgn014972	30652.2
BMgn003608	14297.1
BMgn000867	12540.3
BMgn016002	11695.1
BMgn005928	10142.3
BMgn004911	9779.1
BMgn008881	9550.43
BMgn008903	8771.78
BMgn007645	8077.05
BMgn001043	7515.7
BMgn015572	7319.32
BMgn014094	7303.21
BMgn011416	7183.45
BMgn002811	6916.35
BMgn001501	6281.42
BMgn003197	6131.05
BMgn013157	5920.75
BMgn013792	5899.45
BMgn002381	5720.72
BMgn010487	5167.45
BMgn011948	5068.33
BMgn011620	5048.07
BMgn011467	5020.82
BMgn003412	4942.63
BMgn011282	4791
BMgn003309	4763.42
BMgn004165	4761.4
BMgn007661	4689.64
BMgn006986	4670.61
BMgn004356	4525.45
BMgn001471	4416.24
BMgn011446	4409.45
BMgn009751	4311.78
BMgn009863	4213.94
BMgn010571	3966.74
BMgn003978	3885.57
BMgn010139	3789.09
BMgn006867	3733.47
BMgn003337	3678.54
BMgn001243	3659.52
BMgn007795	3590.71
BMgn008302	3409.28
BMgn001363	3402.4
BMgn012414	3326.14
BMgn003726	3284.49
BMgn010867	3187.43
BMgn006414	3158.13
BMgn007477	2998.22
BMgn013413	2508.34
BMgn001106	2434.52
BMgn003923	1986.88
BMgn002644	1675.46
BMgn006412	1436.88
BMgn007490	1339.03
BMgn008921	1220.21
BMgn001853	1047.2
BMgn002164	961.589
BMgn003186	854.964
BMgn007586	777.723
BMgn011936	699.217
BMgn006141	651.578
BMgn007637	627.272
BMgn013451	589.935
BMgn013680	587.628
BMgn013511	575.579
BMgn007114	565.204
BMgn010751	549.773
BMgn005550	499.475
BMgn011581	493.925
BMgn013464	411.875
BMgn004612	377.218
BMgn001302	340.37
BMgn005347	336.542
BMgn010588	316.689
BMgn003977	315.037
BMgn003361	310.167
BMgn003695	308.389
BMgn016814	297.582
BMgn010541	296.965
BMgn012851	289.581
BMgn013678	287.564
BMgn004661	275.349
BMgn003004	270.242
BMgn006945	261.461
BMgn010246	257.876
BMgn001318	250.728
BMgn011618	243.173
BMgn001395	236.203
BMgn012960	233.726
BMgn012356	227.401
BMgn001460	227.397
BMgn003974	226.524
BMgn012032	221.88
BMgn004510	216.888
BMgn009182	216.432
BMgn013566	213.753
BMgn011507	212.098
BMgn007988	207.859
BMgn006523	203.602
BMgn005323	202.361
BMgn012772	194.321
BMgn009504	190.12
BMgn003009	183.955
BMgn004573	182.57
BMgn007334	181.572
BMgn002582	178.098
BMgn009845	173.203
BMgn000201	171.829
BMgn008521	169.689
BMgn003892	166.406
BMgn011819	166.111
BMgn003758	158.107
BMgn001035	157.538
BMgn004892	156.794
BMgn006158	152.795
BMgn016587	152.682
BMgn010673	151.99
BMgn016162	150.782
BMgn002594	150.33
BMgn003398	148.196
BMgn016878	147.604
BMgn016482	146.37
BMgn016490	143.996
BMgn015145	143.756
BMgn011824	142.885
BMgn013100	140.252
BMgn006497	140.019
BMgn002241	139.663
BMgn017088	139.157
BMgn008542	137.674
BMgn005425	136.77
BMgn013025	130.914
BMgn017077	130.145
BMgn000074	128.482
BMgn016673	124.395
BMgn005994	115.225
BMgn011117	114.728
BMgn011973	113.21
BMgn015754	112.844
BMgn012474	112.366
BMgn012004	108.22
BMgn005739	108.029
BMgn002340	107.727
BMgn003335	107.681
BMgn010723	105.092
BMgn005755	103.664
BMgn010396	101.281
BMgn007192	100.02
BMgn011584	99.908
BMgn003267	99.4735
BMgn015807	99.2987
BMgn004782	98.1744
BMgn001252	97.1478
BMgn007263	93.8943
BMgn013230	93.3922
BMgn013898	92.7747
BMgn006415	91.8659
BMgn003840	90.7817
BMgn009911	89.6582
BMgn011493	87.1213
BMgn003985	86.5291
BMgn012151	86.1938
BMgn007879	85.773
BMgn003301	85.4926
BMgn005452	83.6877
BMgn002707	83.0929
BMgn003196	83.0821
BMgn004164	82.6043
BMgn000925	82.4855
BMgn013063	82.1093
BMgn003001	81.9344
BMgn016049	81.6197
BMgn010864	80.9377
BMgn005451	80.5911
BMgn013801	79.0366
BMgn006828	77.2696
BMgn008525	74.4137
BMgn012200	74.3339
BMgn010068	74.0695
BMgn009795	73.2563
BMgn010756	73.1586
BMgn008010	72.7619
BMgn009968	71.8552
BMgn016116	70.2726
BMgn014403	68.427
BMgn008088	67.54
BMgn009817	66.4348
BMgn014122	64.8467
BMgn011307	64.7806
BMgn010173	63.9692
BMgn016454	63.7254
BMgn007594	63.7051
BMgn009963	62.0255
BMgn001950	61.4493
BMgn004315	60.9941
BMgn005126	60.5422
BMgn002346	60.4762
BMgn010668	59.979
BMgn000412	59.4835
BMgn010057	58.6452
BMgn003815	58.516
BMgn006477	58.1163
BMgn005503	56.9687
BMgn005949	56.1035
BMgn000399	55.0983
BMgn016330	54.2095
BMgn001386	53.9124
BMgn007460	53.502
BMgn011631	52.9596
BMgn005659	52.766
BMgn007845	52.3273
BMgn003474	52.1532
BMgn015990	51.3842
BMgn003704	51.0527
BMgn004980	50.7936
BMgn003652	50.6757
BMgn006108	50.4871
BMgn000177	50.0559
BMgn002790	50.0437
BMgn002360	49.9176
BMgn007082	49.8651
BMgn001921	49.5848
BMgn009980	49.5297
BMgn015139	49.4428
BMgn007895	48.9239
BMgn010365	48.7156
BMgn011978	48.5568
BMgn006357	47.6539
BMgn016150	47.5428
BMgn006634	47.1438
BMgn007796	46.8075
BMgn008048	46.5206
BMgn007658	46.0186
BMgn011131	45.8594
BMgn007205	45.8522
BMgn002359	45.2748
BMgn010260	44.9758
BMgn012299	44.3843
BMgn007940	44.3408
BMgn011450	44.2443
BMgn002363	43.569
BMgn012852	43.4975
BMgn003151	43.3766
BMgn010150	43.1132
BMgn012517	43.0389
BMgn001509	42.2899
BMgn006222	42.2782
BMgn005797	42.168
BMgn002829	42.1035
BMgn010621	41.8191
BMgn000154	41.6244
BMgn004745	41.2922
BMgn001825	41.1355
BMgn012560	41.1028
BMgn013112	40.6807
BMgn000120	40.5689
BMgn013508	40.3878
BMgn015286	40.2109
BMgn007466	39.9562
BMgn010802	39.4211
BMgn002818	39.3409
BMgn002460	39.3294
BMgn006459	38.5936
BMgn003767	38.4144
BMgn001898	38.0111
BMgn006178	37.9361
BMgn002188	37.7136
BMgn009372	37.6326
BMgn010154	37.6214
BMgn007582	37.2823
BMgn013506	37.1935
BMgn005650	36.5818
BMgn000103	36.4705
BMgn003294	36.2906
BMgn006045	36.1931
BMgn010593	36.1175
BMgn003362	36.1011
BMgn003480	35.6184
BMgn000995	35.5224
BMgn007842	35.521
BMgn002837	35.4022
BMgn002779	35.0357
BMgn006964	35.0183
BMgn005448	34.5096
BMgn013200	34.2163
BMgn001638	34.1419
BMgn001137	34.0662
BMgn002973	33.9322
BMgn002972	33.9295
BMgn007606	33.9212
BMgn017167	33.1168
BMgn009829	33.0415
BMgn006851	32.7477
BMgn005022	32.6828
BMgn004874	32.569
BMgn002215	32.566
BMgn011568	32.4918
BMgn012893	32.1553
BMgn013146	31.5136
BMgn011963	31.3335
BMgn006627	31.2279
BMgn004785	31.1951
BMgn006772	31.0586
BMgn010397	30.9542
BMgn010234	30.8925
BMgn001009	30.7991
BMgn013974	30.7819
BMgn006134	30.6216
BMgn007782	30.5504
BMgn003421	30.5008
BMgn015133	30.4573
BMgn000898	30.0769
BMgn007613	29.9374
BMgn006613	29.914
BMgn011133	29.8812
BMgn000394	29.75
BMgn014984	29.6887
BMgn006102	29.495
BMgn006931	29.447
BMgn001189	29.4426
BMgn013896	29.3856
BMgn005519	29.301
BMgn008116	28.8994
BMgn007773	28.8471
BMgn011175	28.7867
BMgn008336	28.7158
BMgn011417	28.6302
BMgn010227	28.6257
BMgn004137	28.557
BMgn000955	28.4977
BMgn002978	28.1765
BMgn011514	28.1596
BMgn015729	28.0999
BMgn008815	27.8966
BMgn017016	27.8565
BMgn009463	27.7902
BMgn000360	27.4666
BMgn008596	27.3857
BMgn009999	27.2394
BMgn005217	27.1912
BMgn008447	27.1581
BMgn010200	27.1347
BMgn000767	27.133
BMgn008922	27.0985
BMgn009468	26.8483
BMgn001165	26.8295
BMgn004979	26.4726
BMgn010210	26.4435
BMgn002931	26.4103
BMgn007709	26.3981
BMgn012918	26.1077
BMgn005089	26.0606
BMgn012776	26.023
BMgn001496	26.0093
BMgn007222	26.0067
BMgn004890	25.8552
BMgn010376	25.8404
BMgn011793	25.6866
BMgn007603	25.5793
BMgn006752	25.4785
BMgn000542	25.4126
BMgn003668	25.1449
BMgn014402	25.1234
BMgn011976	25.0371
BMgn005290	25.0107
BMgn005288	24.9509
BMgn011448	24.8832
BMgn014121	24.7004
BMgn012793	24.3602
BMgn000839	24.2211
BMgn007017	24.1884
BMgn012397	24.1786
BMgn012700	24.1324
BMgn012689	24.052
BMgn001637	23.9992
BMgn008548	23.9163
BMgn007954	23.6669
BMgn007169	23.6367
BMgn008335	23.6329
BMgn006495	23.6278
BMgn007669	23.5805
BMgn005882	23.5129
BMgn009888	23.4361
BMgn013503	23.3982
BMgn005943	23.1455
BMgn012759	23.0822
BMgn007974	23.0704
BMgn012514	23.0114
BMgn003627	22.7568
BMgn002208	22.7558
BMgn003954	22.6655
BMgn003862	22.616
BMgn001699	22.5136
BMgn010966	22.509
BMgn012072	22.4205
BMgn015519	22.2643
BMgn009049	22.2139
BMgn001425	22.206
BMgn000140	22.0705
BMgn000930	21.9585
BMgn007676	21.9523
BMgn011747	21.9159
BMgn008399	21.8492
BMgn002401	21.8244
BMgn009074	21.8101
BMgn015491	21.7546
BMgn011089	21.7363
BMgn013255	21.692
BMgn004558	21.5499
BMgn000980	21.4718
BMgn000800	21.4418
BMgn013250	21.4305
BMgn007741	21.4242
BMgn006140	21.409
BMgn005344	21.3484
BMgn003183	21.272
BMgn000518	21.1816
BMgn001142	21.1354
BMgn016368	21.0235
BMgn012295	20.7735
BMgn010815	20.6563
BMgn000786	20.3336
BMgn016852	20.2305
BMgn001283	20.0027
BMgn005488	19.8733
BMgn003126	19.8262
BMgn002236	19.7746
BMgn014135	19.6345
BMgn009883	19.5909
BMgn009298	19.5424
BMgn010619	19.5264
BMgn005776	19.3897
BMgn011615	19.3144
BMgn010171	19.2587
BMgn005107	19.1722
BMgn006607	18.9604
BMgn006813	18.7975
BMgn016645	18.7284
BMgn007503	18.7266
BMgn006957	18.5777
BMgn009458	18.1785
BMgn004920	18.1504
BMgn008549	18.0364
BMgn011476	17.9885
BMgn011178	17.9492
BMgn010964	17.9042
BMgn004758	17.8632
BMgn007424	17.7068
BMgn001478	17.6495
BMgn011827	17.4988
BMgn009895	17.3066
BMgn000844	17.0823
BMgn006711	16.994
BMgn005388	16.8481
BMgn001522	16.8413
BMgn010827	16.7859
BMgn016033	16.7566
BMgn008851	16.7231
BMgn005634	16.6983
BMgn008783	16.6977
BMgn005724	16.6704
BMgn006103	16.585
BMgn009122	16.5357
BMgn012536	16.4764
BMgn006848	16.435
BMgn008047	16.4147
BMgn003699	16.3151
BMgn013134	16.1731
BMgn005601	16.1598
BMgn001250	16.1566
BMgn003744	16.1489
BMgn006014	16.1394
BMgn001282	16.1105
BMgn009262	16.0839
BMgn008714	16.0635
BMgn007449	15.954
BMgn009228	15.9238
BMgn004905	15.7845
BMgn006834	15.6941
BMgn009221	15.6555
BMgn004857	15.6465
BMgn008433	15.6164
BMgn003401	15.4985
BMgn008924	15.3867
BMgn000362	15.2457
BMgn009664	15.1039
BMgn007583	15.0752
BMgn011562	15.0328
BMgn008503	14.9198
BMgn017326	14.7508
BMgn000323	14.7306
BMgn017141	14.7214
BMgn011229	14.7074
BMgn004036	14.2777
BMgn008989	14.2479
BMgn016120	14.2002
BMgn003378	14.1926
BMgn006638	14.1819
BMgn004915	14.1602
BMgn001766	14.1528
BMgn012353	14.0734
BMgn011071	13.9779
BMgn007973	13.9674
BMgn015554	13.8779
BMgn006888	13.8397
BMgn014732	13.6308
BMgn013299	13.561
BMgn004936	13.505
BMgn013453	13.2836
BMgn013166	13.1533
BMgn007431	13.1265
BMgn011804	13.1109
BMgn005268	12.9589
BMgn004201	12.9534
BMgn014143	12.9045
BMgn004963	12.7135
BMgn010228	12.6902
BMgn012038	12.5961
BMgn003446	12.5698
BMgn013496	12.5634
BMgn005151	12.5595
BMgn005377	12.5573
BMgn007870	12.5408
BMgn013150	12.5018
BMgn010510	12.4399
BMgn010628	12.4135
BMgn012516	12.4055
BMgn010797	12.3948
BMgn016609	12.376
BMgn005450	12.3384
BMgn004711	12.3185
BMgn007210	12.3177
BMgn009835	12.2368
BMgn011995	12.1998
BMgn016357	11.9659
BMgn009170	11.8549
BMgn006611	11.8023
BMgn007194	11.7174
BMgn002687	11.7129
BMgn008854	11.7028
BMgn010711	11.565
BMgn010561	11.5343
BMgn002820	11.474
BMgn003997	11.4506
BMgn010884	11.3061
BMgn001818	11.2941
BMgn013902	11.2594
BMgn001160	11.208
BMgn011735	11.0311
BMgn003961	10.9976
BMgn005061	10.9576
BMgn011650	10.8654
BMgn012100	10.8422
BMgn005834	10.8176
BMgn007963	10.7174
BMgn010147	10.6997
BMgn012470	10.6937
BMgn011662	10.6854
BMgn009465	10.6779
BMgn012672	10.6444
BMgn010499	10.6129
BMgn011755	10.5865
BMgn003377	10.5104
BMgn008283	10.4732
BMgn005106	10.3751
BMgn013624	10.3406
BMgn005306	10.268
BMgn002481	10.1048
BMgn012775	10.103
BMgn004873	10.0492
BMgn009859	10.0345
BMgn000813	9.93529
BMgn012829	9.79471
BMgn008825	9.79452
BMgn006687	9.70323
BMgn011250	9.70208
BMgn005072	9.66836
BMgn013556	9.59851
BMgn007459	9.58639
BMgn007539	9.58125
BMgn002808	9.56974
BMgn012625	9.5531
BMgn004738	9.51187
BMgn005582	9.4181
BMgn005991	9.36927
BMgn008014	9.17864
BMgn010748	9.17397
BMgn009855	9.12664
BMgn000853	9.12228
BMgn003451	9.07027
BMgn010474	9.03201
BMgn004849	9.01107
BMgn007293	8.89873
BMgn015067	8.89252
BMgn007581	8.8165
BMgn006010	8.80596
BMgn015943	8.78794
BMgn006706	8.76478
BMgn002656	8.69041
BMgn006044	8.67244
BMgn007718	8.64749
BMgn015778	8.5369
BMgn000771	8.51365
BMgn012693	8.47948
BMgn011810	8.42854
BMgn012610	8.32313
BMgn006056	8.26427
BMgn005799	8.21159
BMgn001654	8.11939
BMgn009425	7.97284
BMgn001257	7.95303
BMgn000663	7.9264
BMgn005308	7.86595
BMgn004962	7.84582
BMgn013854	7.72248
BMgn015223	7.71271
BMgn014829	7.66172
BMgn007622	7.62001
BMgn014363	7.47216
BMgn000754	7.47166
BMgn013842	7.37322
BMgn008842	7.11816
BMgn001183	7.105
BMgn012224	7.09924
BMgn007510	7.01098
BMgn004516	6.99124
BMgn001628	6.98833
BMgn001523	6.97478
BMgn005570	6.95512
BMgn006778	6.90351
BMgn011663	6.89207
BMgn001777	6.77177
BMgn007615	6.74442
BMgn006411	6.71993
BMgn006640	6.68174
BMgn013675	6.57073
BMgn003578	6.54942
BMgn013621	6.49246
BMgn007221	6.46518
BMgn001423	6.40723
BMgn000174	6.3311
BMgn007780	6.07862
BMgn001770	6.06859
BMgn006328	6.01823
BMgn001062	6.0168
BMgn013251	5.95503
BMgn012696	5.94663
BMgn013222	5.94637
BMgn003200	5.86752
BMgn010576	5.84866
BMgn009373	5.72717
BMgn010868	5.68868
BMgn002377	5.67928
BMgn014805	5.63836
BMgn009848	5.62395
BMgn009662	5.57005
BMgn005167	5.46891
BMgn014174	5.45539
BMgn002776	5.34193
BMgn008275	5.3414
BMgn003318	5.32066
BMgn014826	5.2696
BMgn016982	5.26011
BMgn007523	5.15058
BMgn005930	5.11756
BMgn007847	5.10164
BMgn013576	5.05484
BMgn004655	4.94458
BMgn015142	4.9013
BMgn000355	4.8933
BMgn010074	4.84752
BMgn011184	4.82014
BMgn007080	4.76242
BMgn010519	4.6712
BMgn015558	4.62868
BMgn009917	4.61499
BMgn012039	4.61025
BMgn015237	4.59569
BMgn000852	4.58647
BMgn003989	4.57752
BMgn000726	4.5628
BMgn010273	4.38992
BMgn009619	4.35486
BMgn016733	4.32312
BMgn008785	4.2879
BMgn000359	4.27732
BMgn006258	4.25891
BMgn011008	4.15793
BMgn004373	4.07808
BMgn013527	4.00294
BMgn010791	3.96143
BMgn003182	3.95776
BMgn004513	3.88807
BMgn004698	3.83206
BMgn011028	3.8004
BMgn003607	3.78671
BMgn012564	3.69743
BMgn007835	3.68534
BMgn013180	3.66313
BMgn016893	3.6075
BMgn011576	3.59094
BMgn006845	3.58995
BMgn003350	3.54333
BMgn016877	3.53739
BMgn013997	3.46163
BMgn001190	3.36789
BMgn016851	3.29863
BMgn011745	3.23223
BMgn011155	3.17167
BMgn015618	3.1582
BMgn012244	3.15109
BMgn001983	3.0359
BMgn002217	3.02751
BMgn012795	2.97706
BMgn000483	2.9679
BMgn012525	2.96692
BMgn000513	2.85632
BMgn013407	2.82276
BMgn016922	2.70812
BMgn012005	2.647
BMgn002926	2.63196
BMgn009225	2.55952
BMgn014847	2.51723
BMgn001835	2.43584
BMgn004041	2.40359
BMgn004128	2.35591
BMgn014998	2.3456
BMgn011353	2.30271
BMgn006630	2.29861
BMgn000348	2.27478
BMgn016159	2.2133
BMgn009126	2.13804
BMgn007383	2.13669
BMgn009831	2.13609
BMgn008467	2.12592
BMgn001985	2.05339
BMgn016960	2.03748
BMgn009532	1.99688
BMgn004696	1.96231
BMgn016014	1.95512
BMgn008896	1.91488
BMgn011924	1.88794
BMgn015148	1.87322
BMgn001169	1.81074
BMgn001788	1.78137
BMgn008277	1.73993
BMgn006370	1.69849
BMgn004517	1.69402
BMgn014378	1.63898
BMgn003777	1.59727
BMgn005483	1.55526
BMgn009294	1.53632
BMgn014803	1.53091
BMgn001881	1.40654
BMgn008569	1.40343
BMgn013922	1.34228
BMgn012120	1.23032
BMgn009489	1.22672
BMgn000909	1.1859
BMgn012387	1.15928
BMgn011128	1.12377
BMgn009173	1.11661
BMgn015420	1.11312
BMgn011603	1.1075
BMgn003172	1.06947
BMgn003385	1.06298
BMgn012734	1.05506
BMgn013955	1.04959
BMgn006854	1.04707
BMgn013055	1.01708

## Sheet: Growth-restricting genes in SG
Gene ID	Expression
BMgn008865	5267.38
BMgn006282	2175.52
BMgn000475	1678.4
BMgn010959	1230.11
BMgn015447	623.27
BMgn005576	589.517
BMgn011742	539.313
BMgn011746	338.093
BMgn004527	332.462
BMgn011713	293.198
BMgn001593	292.137
BMgn009571	215.299
BMgn015371	211.471
BMgn000715	207.992
BMgn010739	185.403
BMgn011809	175.117
BMgn014144	149.625
BMgn002750	144.605
BMgn011646	125.6
BMgn016990	100.144
BMgn015643	99.3406
BMgn005560	98.6456
BMgn004414	96.8705
BMgn010620	90.8339
BMgn015531	83.5867
BMgn016382	81.4883
BMgn009755	81.4052
BMgn008321	80.863
BMgn009496	80.2584
BMgn008828	78.3906
BMgn015741	74.9361
BMgn014851	70.9348
BMgn001037	70.5763
BMgn012931	69.2204
BMgn005372	68.4341
BMgn007642	68.4165
BMgn014943	64.9838
BMgn015177	63.527
BMgn001402	62.0744
BMgn015382	56.993
BMgn008284	55.7635
BMgn002016	55.7364
BMgn008879	55.0762
BMgn008238	53.5736
BMgn013852	51.5832
BMgn005852	47.3448
BMgn005828	47.288
BMgn017144	47.2878
BMgn008846	45.4069
BMgn009236	44.316
BMgn014093	43.3825
BMgn010437	42.6772
BMgn008900	42.5608
BMgn001841	41.4082
BMgn017112	40.7371
BMgn003872	40.6247
BMgn003671	40.0264
BMgn000366	39.9123
BMgn000118	38.7361
BMgn007501	38.297
BMgn011841	38.1791
BMgn013493	37.7415
BMgn000350	37.6313
BMgn011772	37.5557
BMgn012975	37.4419
BMgn003202	37.3079
BMgn012743	37.1076
BMgn005485	36.7823
BMgn008983	35.5561
BMgn005436	35.333
BMgn006541	34.8223
BMgn016894	34.7535
BMgn015790	34.4359
BMgn011491	34.3608
BMgn011281	33.5036
BMgn007170	33.4212
BMgn006037	33.3473
BMgn010151	33.3042
BMgn005584	33.2939
BMgn007922	32.9079
BMgn002793	32.7493
BMgn007345	31.8949
BMgn007663	31.8755
BMgn004555	31.7776
BMgn012916	31.3358
BMgn003007	30.5334
BMgn000222	30.494
BMgn012450	30.4606
BMgn008288	30.1283
BMgn016829	28.6934
BMgn003698	28.5497
BMgn001219	28.2878
BMgn005531	27.783
BMgn014129	27.7211
BMgn003586	27.6228
BMgn011062	27.322
BMgn017105	27.1604
BMgn016534	27.0937
BMgn002165	27.0781
BMgn003490	25.9987
BMgn011919	25.3542
BMgn015961	25.3453
BMgn007808	25.2799
BMgn004415	25.0165
BMgn007805	24.8303
BMgn005183	24.4199
BMgn010464	24.3795
BMgn003536	24.1932
BMgn000321	23.9282
BMgn011181	23.7364
BMgn015311	23.6828
BMgn005688	23.3611
BMgn012577	23.3481
BMgn015679	23.1775
BMgn006872	23.142
BMgn000150	22.9054
BMgn003949	22.9036
BMgn010488	22.8446
BMgn001944	22.5483
BMgn009707	22.0294
BMgn003659	21.7852
BMgn000948	21.6621
BMgn008096	21.5403
BMgn008874	20.9489
BMgn007961	20.8308
BMgn011939	20.6413
BMgn008307	20.5983
BMgn010585	20.2533
BMgn005586	20.2519
BMgn003124	20.0306
BMgn013813	19.8288
BMgn001313	19.8288
BMgn004337	19.701
BMgn005305	19.656
BMgn009295	19.6514
BMgn014833	19.6199
BMgn001739	19.4371
BMgn009022	19.4157
BMgn010030	19.0132
BMgn008927	18.7306
BMgn005374	18.7006
BMgn016263	18.687
BMgn003771	18.5064
BMgn007298	18.42
BMgn004758	17.8632
BMgn005416	17.7724
BMgn012082	17.5957
BMgn003187	17.4668
BMgn001449	17.4594
BMgn011162	17.3352
BMgn015707	16.9964
BMgn015147	16.8896
BMgn008387	16.7538
BMgn012479	16.7445
BMgn014804	16.6878
BMgn005044	16.6424
BMgn014892	16.6306
BMgn006391	16.6263
BMgn008999	16.6177
BMgn009636	16.5961
BMgn008185	16.4961
BMgn000975	16.2057
BMgn015590	16.0454
BMgn017057	16.0042
BMgn009216	15.8366
BMgn006186	15.7934
BMgn002625	15.7102
BMgn000620	15.7087
BMgn006559	15.6969
BMgn009640	15.5195
BMgn007093	15.5038
BMgn007853	14.9529
BMgn000297	14.8481
BMgn014775	14.6535
BMgn008020	14.4071
BMgn016728	14.3846
BMgn005879	14.3681
BMgn007945	14.3175
BMgn000689	14.1197
BMgn007478	14.0015
BMgn007552	13.9338
BMgn003496	13.9259
BMgn006763	13.2376
BMgn005304	13.2094
BMgn015993	12.5322
BMgn001722	12.4955
BMgn007632	12.4902
BMgn004020	12.3961
BMgn013897	12.2409
BMgn011808	11.9975
BMgn015404	11.9969
BMgn011372	11.9849
BMgn000237	11.9058
BMgn002840	11.8065
BMgn003121	11.7175
BMgn015842	11.6497
BMgn016487	11.6218
BMgn003430	11.5856
BMgn012310	11.5488
BMgn010071	11.4383
BMgn008636	11.1991
BMgn000750	11.1842
BMgn017194	11.1751
BMgn001695	11.1613
BMgn007612	10.9564
BMgn012081	10.8623
BMgn015126	10.8307
BMgn008495	10.8229
BMgn009898	10.7364
BMgn006857	10.5194
BMgn010719	10.4276
BMgn013501	10.4237
BMgn008690	10.423
BMgn011171	10.3852
BMgn005682	10.3492
BMgn014131	10.3068
BMgn014272	10.3056
BMgn012108	10.2441
BMgn006736	10.1263
BMgn016271	9.96087
BMgn008175	9.92381
BMgn014806	9.46351
BMgn003045	9.40024
BMgn012518	9.33317
BMgn006517	9.27568
BMgn014731	9.05707
BMgn006891	9.03198
BMgn002596	8.93071
BMgn009876	8.71284
BMgn006503	8.69802
BMgn011367	8.69799
BMgn010731	8.67478
BMgn006933	8.65308
BMgn002495	8.59502
BMgn012725	8.57534
BMgn016520	8.5392
BMgn016359	8.4753
BMgn008484	8.44258
BMgn002080	8.40535
BMgn014794	8.3879
BMgn006727	8.36886
BMgn002014	8.34441
BMgn012178	8.3171
BMgn012024	8.27702
BMgn000645	8.20826
BMgn009346	8.06952
BMgn012992	7.93124
BMgn016701	7.91923
BMgn016991	7.85264
BMgn009894	7.75864
BMgn013545	7.70922
BMgn001102	7.58931
BMgn010327	7.55375
BMgn007576	7.44253
BMgn009852	7.40617
BMgn008697	7.36422
BMgn010996	7.35224
BMgn008993	7.34449
BMgn001657	7.24962
BMgn010336	7.14601
BMgn015030	7.0538
BMgn008555	6.99523
BMgn009006	6.9896
BMgn017231	6.97947
BMgn013084	6.93302
BMgn016035	6.84168
BMgn000063	6.78784
BMgn003364	6.7391
BMgn013535	6.66271
BMgn015303	6.66224
BMgn015416	6.51757
BMgn010965	6.48171
BMgn003040	6.47235
BMgn016700	6.4544
BMgn007063	6.4216
BMgn013163	6.39828
BMgn009975	6.36817
BMgn001233	6.2143
BMgn009580	6.21422
BMgn003152	6.16263
BMgn007025	6.14493
BMgn010786	6.0438
BMgn014671	5.92264
BMgn016742	5.9159
BMgn013891	5.73692
BMgn001484	5.73565
BMgn001939	5.4978
BMgn012396	5.47305
BMgn013332	5.41952
BMgn005185	5.41546
BMgn008155	5.36948
BMgn005639	5.33054
BMgn016846	5.26508
BMgn014920	5.2196
BMgn006694	5.13154
BMgn016758	5.01069
BMgn001069	4.99538
BMgn016244	4.95549
BMgn010413	4.95504
BMgn012678	4.83632
BMgn010508	4.82919
BMgn002597	4.74696
BMgn010975	4.74425
BMgn003393	4.5584
BMgn014947	4.51581
BMgn012366	4.49351
BMgn000711	4.48555
BMgn004235	4.48158
BMgn008694	4.43979
BMgn007784	4.33908
BMgn014709	4.29987
BMgn008157	4.28074
BMgn014001	4.26958
BMgn002658	4.21638
BMgn015409	4.14858
BMgn005009	4.14697
BMgn012688	4.11688
BMgn002803	4.01685
BMgn012006	3.85667
BMgn009740	3.82643
BMgn008727	3.81546
BMgn013115	3.81315
BMgn010401	3.71427
BMgn000933	3.70504
BMgn005977	3.68016
BMgn011042	3.63478
BMgn015510	3.62377
BMgn017067	3.61726
BMgn008605	3.49809
BMgn006744	3.43533
BMgn003180	3.40095
BMgn002483	3.39916
BMgn009456	3.3828
BMgn011086	3.36433
BMgn003589	3.36254
BMgn015366	3.32015
BMgn011147	3.29902
BMgn007322	3.27288
BMgn009836	3.23417
BMgn006547	3.22281
BMgn012914	3.18885
BMgn017234	3.10628
BMgn003021	3.07537
BMgn012600	3.00593
BMgn000775	2.97423
BMgn012779	2.79511
BMgn015965	2.72007
BMgn013210	2.71766
BMgn015222	2.69839
BMgn002778	2.67499
BMgn003808	2.66595
BMgn000307	2.65597
BMgn015782	2.6536
BMgn008961	2.54549
BMgn001466	2.54094
BMgn007388	2.48062
BMgn003588	2.45692
BMgn015771	2.45573
BMgn007331	2.43011
BMgn005717	2.25648
BMgn002526	2.16333
BMgn002717	2.16099
BMgn006048	2.07839
BMgn005858	2.02973
BMgn004959	1.99829
BMgn010196	1.95587
BMgn008129	1.91255
BMgn001387	1.83476
BMgn009758	1.782
BMgn015004	1.76838
BMgn005718	1.72047
BMgn004955	1.71689
BMgn012948	1.69532
BMgn006410	1.68312
BMgn013584	1.64091
BMgn016858	1.61042
BMgn005356	1.60244
BMgn016237	1.59858
BMgn012074	1.59116
BMgn001986	1.56809
BMgn003102	1.52988
BMgn011163	1.43778
BMgn012197	1.43624
BMgn009548	1.42424
BMgn010252	1.33431
BMgn016256	1.32641
BMgn006636	1.31944
BMgn016290	1.31894
BMgn011152	1.2704
BMgn003532	1.25046
BMgn007016	1.24727
BMgn006746	1.22012
BMgn012290	1.19346
BMgn004843	1.18309
BMgn007378	1.15643
BMgn006527	1.14993
BMgn004537	1.14609
BMgn002910	1.13548
BMgn002066	1.0502
BMgn015457	1.04222
BMgn010323	1.03927
BMgn017033	1.03924
BMgn003115	1.01149
BMgn017032	1.00741
