# Supplementary material for: Genome-wide CRISPR screening reveals genes essential for cell viability and resistance to abiotic and biotic stresses in Bombyx mori
Source: HighWire-hosted journal article supplement (doi:10.1101/gr.249045.119), 2020-05-01
Supplement: Supplemental_Table_S6.xlsx.xlsx [file Supplemental_Table_S6.xlsx.xlsx]

## Sheet: Supplemental Table legend
Supplemental_Table_S6. CRISPR screens to identify genes responsible for temperature challenging
Sheet1	Supplemental Table legend
Sheet2	negative screening in 4 ℃
Sheet3	positive screening in 4 ℃
Sheet4	sgRNA score in 4 ℃
Sheet5	negative screening in 30 ℃
Sheet6	positive screening in 30 ℃
Sheet7	sgRNA score in 30 ℃

## Sheet: negative screening in 4 ℃
Gene ID	neg|score	neg|p-value	neg|rank
BMgn005735	2.74e-05	0.00010124	1
BMgn011370	3.58e-05	0.00011879	2
BMgn016522	4.76e-05	0.00019087	3
BMgn017544	7.28e-05	0.00023601	4
BMgn015628	7.91e-05	0.00025669	5
BMgn010916	8.36e-05	7.99e-05	6
BMgn013062	9.09e-05	0.00032815	7
BMgn001596	9.32e-05	0.00029242	8
BMgn009249	9.93e-05	0.00035636	9
BMgn009099	0.00011131	0.00020592	10
BMgn006167	0.00011608	0.00043973	11
BMgn016862	0.00012667	0.00039648	12
BMgn006123	0.00017922	0.00068044	13
BMgn008836	0.00020929	0.00063531	14
BMgn006610	0.00023895	0.0007613	15
BMgn004914	0.00025287	0.00099386	16
BMgn004641	0.00028583	0.00085282	17
BMgn015360	0.00028739	0.00085784	18
BMgn008300	0.0003009	0.00089795	19
BMgn005746	0.00033095	0.00099073	20
BMgn013275	0.00035843	0.0006936	21
BMgn015723	0.00038157	0.001133	22
BMgn002270	0.00038777	0.0011662	23
BMgn014943	0.00039425	0.0011775	24
BMgn005738	0.00040558	0.0012007	25
BMgn009597	0.00043008	0.0012603	26
BMgn015319	0.00045749	0.0017078	27
BMgn012042	0.00052605	0.0019554	28
BMgn007000	0.00053171	0.0019561	29
BMgn010872	0.00054531	0.0015837	30
BMgn014170	0.00061594	0.0018069	31
BMgn014225	0.00062118	0.0017856	32
BMgn001485	0.00066553	0.0019485	33
BMgn005123	0.00067486	0.0019755	34
BMgn004583	0.00068091	0.0019874	35
BMgn002823	0.00073913	0.0021548	36
BMgn016175	0.00074067	0.0013769	37
BMgn013221	0.00074543	0.0013919	38
BMgn012622	0.00076651	0.0022306	39
BMgn000377	0.0007956	0.0023127	40
BMgn002341	0.00080395	0.0015085	41
BMgn007771	0.00081226	0.0022983	42
BMgn004763	0.00082166	0.0015367	43
BMgn016476	0.00082423	0.0023967	44
BMgn006344	0.000884	0.0016508	45
BMgn007454	0.00091168	0.0017028	46
BMgn005554	0.0010033	0.0028123	47
BMgn000242	0.0010156	0.0009901	48
BMgn013256	0.0010273	0.0019416	49
BMgn005382	0.0010392	0.0030192	50
BMgn007745	0.0010695	0.002025	51
BMgn000061	0.0010919	0.0031809	52
BMgn015401	0.0011114	0.0032355	53
BMgn000273	0.0011137	0.0021272	54
BMgn001493	0.0011369	0.0032981	55
BMgn005214	0.0011824	0.0034216	56
BMgn011708	0.0012541	0.0035489	57
BMgn016270	0.0013333	0.0036905	58
BMgn010240	0.0013942	0.0038742	59
BMgn008386	0.0013973	0.0037933	60
BMgn009575	0.0014094	0.0026807	61
BMgn008708	0.0014347	0.0027258	62
BMgn012812	0.0014927	0.0045355	63
BMgn009709	0.001505	0.0028763	64
BMgn014451	0.0015512	0.0042857	65
BMgn014799	0.001612	0.0048609	66
BMgn002170	0.0016122	0.004202	67
BMgn010747	0.0016576	0.0042829	68
BMgn007723	0.0016838	0.0043318	69
BMgn006149	0.0017429	0.0048113	70
BMgn012937	0.0017437	0.003352	71
BMgn005599	0.0017509	0.0033671	72
BMgn011024	0.0017525	0.0048377	73
BMgn012407	0.0018177	0.0050126	74
BMgn009856	0.001821	0.0054432	75
BMgn008753	0.0018392	0.003552	76
BMgn004478	0.0018986	0.0047167	77
BMgn012837	0.0020418	0.0049774	78
BMgn015644	0.0020668	0.005709	79
BMgn015793	0.0020683	0.0057127	80
BMgn011751	0.0021627	0.0021447	81
BMgn012699	0.0022174	0.004318	82
BMgn000784	0.0022877	0.0044421	83
BMgn008195	0.0022957	0.0054219	84
BMgn007036	0.002325	0.0054839	85
BMgn001491	0.0023282	0.0054883	86
BMgn008539	0.0024471	0.0070291	87
BMgn005342	0.0024885	0.0048076	88
BMgn007420	0.0025154	0.0072115	89
BMgn013814	0.0025429	0.0058889	90
BMgn007687	0.0025554	0.0049273	91
BMgn009141	0.002571	0.0070636	92
BMgn008462	0.0026049	0.0060061	93
BMgn000676	0.0026423	0.0060757	94
BMgn008999	0.0026491	0.0075726	95
BMgn000071	0.0026632	0.0061102	96
BMgn013123	0.002686	0.0061484	97
BMgn009741	0.0027095	0.0061973	98
BMgn000910	0.0028291	0.0064236	99
BMgn003929	0.0028667	0.0054958	100
BMgn011055	0.0028734	0.0078873	101
BMgn008561	0.0028895	0.0055422	102
BMgn006234	0.0029007	0.006564	103
BMgn000569	0.0029013	0.0079518	104
BMgn005008	0.0029077	0.0082151	105
BMgn005823	0.0029377	0.0066317	106
BMgn001913	0.0029778	0.0081386	107
BMgn002143	0.0030351	0.0068141	108
BMgn004913	0.0030708	0.0030487	109
BMgn014795	0.0030766	0.0083862	110
BMgn010037	0.0030844	0.0069012	111
BMgn006650	0.0031281	0.0059817	112
BMgn001711	0.0031869	0.0070937	113
BMgn017326	0.0032242	0.0087899	114
BMgn006193	0.00328	0.0089447	115
BMgn006213	0.0032815	0.0091698	116
BMgn003423	0.003328	0.0090663	117
BMgn009478	0.0033337	0.0032972	118
BMgn004261	0.0033814	0.0033577	119
BMgn016654	0.0034639	0.0075995	120
BMgn009261	0.0035445	0.0077531	121
BMgn014529	0.003605	0.0097534	122
BMgn014715	0.0036052	0.0068812	123
BMgn011371	0.0036217	0.0097941	124
BMgn016807	0.003639	0.010079	125
BMgn004790	0.0036529	0.0069752	126
BMgn015858	0.0036876	0.0080164	127
BMgn007995	0.0036934	0.010224	128
BMgn001027	0.003723	0.010064	129
BMgn006722	0.0037696	0.010179	130
BMgn013823	0.0037851	0.007231	131
BMgn001938	0.0037877	0.0037313	132
BMgn017186	0.0039021	0.0084257	133
BMgn010248	0.0039072	0.0038473	134
BMgn017065	0.00393	0.010587	135
BMgn009009	0.003961	0.010666	136
BMgn011278	0.0040028	0.0039469	137
BMgn006876	0.0040483	0.0077312	138
BMgn009103	0.0041155	0.011263	139
BMgn016235	0.0041499	0.011162	140
BMgn000590	0.0041516	0.011165	141
BMgn016171	0.0041754	0.011227	142
BMgn010830	0.0041776	0.0079706	143
BMgn001787	0.0041881	0.008931	144
BMgn017006	0.0041953	0.0089485	145
BMgn016275	0.0042468	0.0081129	146
BMgn008141	0.0042593	0.011454	147
BMgn003027	0.0042596	0.0090732	148
BMgn007416	0.0042597	0.011455	149
BMgn007595	0.0042791	0.011501	150
BMgn002632	0.0043243	0.0091861	151
BMgn016716	0.0043392	0.0082853	152
BMgn013751	0.0043684	0.0083367	153
BMgn011787	0.0044161	0.0084163	154
BMgn010978	0.0044329	0.0043657	155
BMgn008750	0.0044375	0.011818	156
BMgn011976	0.0045115	0.0086012	157
BMgn001011	0.0045444	0.0095992	158
BMgn013435	0.0046536	0.0097979	159
BMgn005513	0.0048032	0.010076	160
BMgn009350	0.0048647	0.010183	161
BMgn015853	0.0049406	0.0094017	162
BMgn010402	0.004979	0.012764	163
BMgn011964	0.005009	0.012815	164
BMgn004531	0.0050359	0.0095942	165
BMgn010953	0.0050442	0.0096148	166
BMgn004756	0.0050457	0.01053	167
BMgn003610	0.0050507	0.012894	168
BMgn011010	0.0050781	0.0050119	169
BMgn002303	0.0051172	0.01068	170
BMgn013927	0.0051174	0.0097527	171
BMgn015845	0.0051591	0.013076	172
BMgn001897	0.005179	0.0098662	173
BMgn017265	0.0051886	0.010825	174
BMgn007698	0.0052072	0.014175	175
BMgn001969	0.0052743	0.01003	176
BMgn013293	0.0053002	0.014431	177
BMgn007937	0.0053002	0.010073	178
BMgn009810	0.0053226	0.014492	179
BMgn007324	0.0053315	0.011107	180
BMgn011119	0.0053423	0.013397	181
BMgn004122	0.0053475	0.01114	182
BMgn009121	0.0053651	0.011174	183
BMgn008587	0.0053898	0.013477	184
BMgn013630	0.0053999	0.013491	185
BMgn004319	0.0054164	0.013521	186
BMgn007278	0.0054248	0.014763	187
BMgn001737	0.005465	0.01037	188
BMgn006855	0.0055126	0.010455	189
BMgn010591	0.00558	0.0055341	190
BMgn005494	0.0056556	0.010731	191
BMgn000160	0.0056741	0.015414	192
BMgn010846	0.0058155	0.012005	193
BMgn010761	0.0058315	0.012032	194
BMgn004983	0.0058369	0.015817	195
BMgn006892	0.0058462	0.011102	196
BMgn004157	0.0058658	0.014382	197
BMgn011868	0.0059415	0.011265	198
BMgn013073	0.0059577	0.014537	199
BMgn012104	0.0059609	0.01454	200
BMgn015789	0.0059743	0.012288	201
BMgn002890	0.0060138	0.016283	202
BMgn006534	0.0060338	0.011433	203
BMgn010935	0.0060368	0.011437	204
BMgn001733	0.0060457	0.012407	205
BMgn006901	0.0060487	0.011457	206
BMgn009145	0.0060754	0.012467	207
BMgn014322	0.0060845	0.011514	208
BMgn008774	0.0062751	0.011873	209
BMgn003372	0.0063208	0.0062807	210
BMgn005356	0.0063415	0.015152	211
BMgn006315	0.0063952	0.013076	212
BMgn011255	0.006418	0.012118	213
BMgn008001	0.0064642	0.0064242	214
BMgn011871	0.0065318	0.015495	215
BMgn015474	0.0065987	0.013442	216
BMgn003708	0.0066139	0.017769	217
BMgn009538	0.0066269	0.015638	218
BMgn002305	0.0066561	0.012575	219
BMgn013189	0.0067914	0.0186	220
BMgn015859	0.0067991	0.012839	221
BMgn005929	0.0068209	0.012875	222
BMgn017317	0.0068209	0.012875	223
BMgn007004	0.0068516	0.018347	224
BMgn003080	0.006938	0.014043	225
BMgn014802	0.0069547	0.014068	226
BMgn017090	0.0069731	0.016219	227
BMgn004258	0.0069896	0.013188	228
BMgn000469	0.0069948	0.014141	229
BMgn015809	0.0070372	0.013266	230
BMgn007472	0.007082	0.014289	231
BMgn014032	0.0071877	0.014495	232
BMgn001417	0.0072277	0.013582	233
BMgn007071	0.007259	0.014621	234
BMgn005350	0.0072753	0.013673	235
BMgn007763	0.0073745	0.014811	236
BMgn010547	0.0074182	0.013939	237
BMgn007457	0.0074679	0.0074115	238
BMgn000179	0.0075888	0.015202	239
BMgn013631	0.0076157	0.01525	240
BMgn003953	0.0076499	0.01736	241
BMgn001388	0.0076563	0.01439	242
BMgn014026	0.0076586	0.015312	243
BMgn015569	0.0076829	0.0076277	244
BMgn009820	0.007687	0.015362	245
BMgn012015	0.0077039	0.014475	246
BMgn011792	0.0077274	0.014521	247
BMgn004863	0.0078297	0.01563	248
BMgn009557	0.0078628	0.017729	249
BMgn015221	0.0078858	0.020889	250
BMgn000478	0.0078943	0.014834	251
BMgn004686	0.0079517	0.014928	252
BMgn005954	0.0079693	0.01591	253
BMgn001367	0.0080622	0.01609	254
BMgn006852	0.0080847	0.015182	255
BMgn012174	0.0081478	0.018201	256
BMgn002925	0.0082752	0.01842	257
BMgn011802	0.0083282	0.0082809	258
BMgn008674	0.0084328	0.018688	259
BMgn009752	0.0084757	0.015939	260
BMgn006204	0.0084893	0.015962	261
BMgn004277	0.0084893	0.015962	262
BMgn007054	0.0085936	0.017037	263
BMgn008680	0.008614	0.017076	264
BMgn003319	0.0086158	0.017079	265
BMgn006733	0.0086852	0.017212	266
BMgn014857	0.0087048	0.017247	267
BMgn012559	0.0087514	0.023083	268
BMgn000656	0.0087822	0.0087366	269
BMgn005108	0.0087831	0.017378	270
BMgn012508	0.0087984	0.019349	271
BMgn008496	0.0087986	0.016548	272
BMgn007883	0.0088392	0.017477	273
BMgn012985	0.0088938	0.016735	274
BMgn010875	0.0089076	0.019542	275
BMgn002493	0.008926	0.016801	276
BMgn017460	0.0089293	0.017646	277
BMgn004899	0.0089495	0.0088927	278
BMgn010684	0.0089703	0.01773	279
BMgn013306	0.0090841	0.017077	280
BMgn006361	0.0090956	0.017949	281
BMgn003566	0.0091646	0.0091046	282
BMgn008553	0.0091792	0.017263	283
BMgn013731	0.0092009	0.024162	284
BMgn011134	0.0092243	0.009171	285
BMgn016866	0.0092268	0.017342	286
BMgn008971	0.00923	0.020096	287
BMgn017106	0.0092399	0.020116	288
BMgn001863	0.009254	0.01739	289
BMgn011575	0.0092553	0.018241	290
BMgn011676	0.0093278	0.017525	291
BMgn017434	0.0093353	0.024498	292
BMgn009997	0.0093403	0.018398	293
BMgn012339	0.0093457	0.017552	294
BMgn000303	0.0093823	0.020372	295
BMgn013674	0.0093971	0.01765	296
BMgn008996	0.0094173	0.018535	297
BMgn014845	0.0094274	0.0093729	298
BMgn012757	0.0094631	0.024815	299
BMgn005346	0.0094647	0.017779	300
BMgn008519	0.0094691	0.018616	301
BMgn005434	0.0094772	0.020539	302
BMgn009139	0.0095403	0.018742	303
BMgn003982	0.0095598	0.017961	304
BMgn002754	0.0095974	0.018035	305
BMgn000079	0.0096074	0.018053	306
BMgn005898	0.009627	0.018885	307
BMgn008861	0.0096664	0.0096136	308
BMgn003510	0.0097125	0.018272	309
BMgn010185	0.0097619	0.021013	310
BMgn016186	0.009762	0.0097158	311
BMgn013487	0.0097667	0.018377	312
BMgn013871	0.0097976	0.018434	313
BMgn015988	0.0099892	0.021379	314
BMgn014586	0.010001	0.0099552	315
BMgn006748	0.010039	0.019629	316
BMgn005134	0.010053	0.019657	317
BMgn003807	0.010086	0.018974	318
BMgn009112	0.01013	0.019049	319
BMgn012369	0.010252	0.019998	320
BMgn005018	0.010288	0.010239	321
BMgn007728	0.010324	0.020131	322
BMgn010539	0.010394	0.020263	323
BMgn002720	0.010395	0.020266	324
BMgn015533	0.010439	0.020333	325
BMgn006606	0.010463	0.019669	326
BMgn007798	0.010483	0.019711	327
BMgn008537	0.010488	0.020416	328
BMgn000335	0.010527	0.010473	329
BMgn007061	0.010528	0.020491	330
BMgn001638	0.010608	0.020629	331
BMgn011180	0.010616	0.022393	332
BMgn001870	0.010646	0.010602	333
BMgn003941	0.010701	0.020143	334
BMgn014820	0.01071	0.02255	335
BMgn000522	0.010751	0.02089	336
BMgn015829	0.010846	0.020432	337
BMgn008073	0.010908	0.020534	338
BMgn015627	0.010914	0.022891	339
BMgn011330	0.011027	0.021393	340
BMgn016432	0.011033	0.020752	341
BMgn013372	0.011034	0.020753	342
BMgn002429	0.01109	0.023199	343
BMgn003735	0.011124	0.020919	344
BMgn009470	0.011139	0.020952	345
BMgn016625	0.011176	0.021018	346
BMgn007335	0.011204	0.0234	347
BMgn003395	0.011215	0.021713	348
BMgn008991	0.011215	0.021713	349
BMgn002001	0.011224	0.021064	350
BMgn004216	0.011249	0.021766	351
BMgn013241	0.011315	0.023577	352
BMgn007965	0.011333	0.021907	353
BMgn003047	0.011359	0.028305	354
BMgn012375	0.011435	0.011359	355
BMgn013054	0.011509	0.021336	356
BMgn014823	0.011527	0.022255	357
BMgn012995	0.011554	0.011477	358
BMgn000773	0.011557	0.021378	359
BMgn013667	0.011596	0.022373	360
BMgn009679	0.011627	0.024094	361
BMgn006879	0.01164	0.028737	362
BMgn006567	0.011647	0.022453	363
BMgn015087	0.011652	0.021473	364
BMgn016170	0.011664	0.022481	365
BMgn001922	0.011747	0.021564	366
BMgn013289	0.011753	0.024296	367
BMgn001232	0.011794	0.021609	368
BMgn006251	0.01187	0.02284	369
BMgn015703	0.011889	0.022876	370
BMgn014858	0.011937	0.021732	371
BMgn014976	0.011984	0.021767	372
BMgn002347	0.012031	0.023123	373
BMgn001919	0.012056	0.011968	374
BMgn013352	0.01213	0.023306	375
BMgn008787	0.012174	0.023373	376
BMgn010366	0.012228	0.025108	377
BMgn007098	0.012245	0.023504	378
BMgn002134	0.012316	0.023617	379
BMgn014033	0.012424	0.029998	380
BMgn016744	0.012459	0.022198	381
BMgn013857	0.012517	0.02397	382
BMgn013901	0.012535	0.030158	383
BMgn012858	0.0126	0.024101	384
BMgn016455	0.012623	0.024144	385
BMgn001609	0.012644	0.025783	386
BMgn013499	0.012649	0.022363	387
BMgn015547	0.012755	0.02596	388
BMgn014115	0.012785	0.012683	389
BMgn006698	0.012792	0.022498	390
BMgn000266	0.012869	0.012766	391
BMgn013235	0.012889	0.02618	392
BMgn013380	0.0129	0.024658	393
BMgn008139	0.012904	0.026209	394
BMgn003276	0.013053	0.022725	395
BMgn009018	0.013072	0.012958	396
BMgn000788	0.013098	0.024977	397
BMgn015012	0.013125	0.025021	398
BMgn003572	0.013173	0.026675	399
BMgn012395	0.013453	0.025604	400
BMgn009250	0.013488	0.031732	401
BMgn002745	0.013508	0.025687	402
BMgn016393	0.013524	0.025712	403
BMgn005831	0.013586	0.013455	404
BMgn012484	0.013741	0.023342	405
BMgn015721	0.013801	0.013673	406
BMgn003450	0.01386	0.013734	407
BMgn012401	0.013879	0.026328	408
BMgn011744	0.013928	0.026415	409
BMgn004519	0.013928	0.026415	410
BMgn014394	0.014195	0.02689	411
BMgn014354	0.014204	0.026908	412
BMgn004151	0.014213	0.026928	413
BMgn008320	0.014216	0.023743	414
BMgn000320	0.014336	0.027141	415
BMgn015471	0.014449	0.027327	416
BMgn009388	0.014477	0.023971	417
BMgn005890	0.014589	0.027591	418
BMgn011150	0.014592	0.029128	419
BMgn010994	0.014687	0.029271	420
BMgn012456	0.014861	0.029596	421
BMgn008828	0.014876	0.029624	422
BMgn007195	0.0149	0.014796	423
BMgn006359	0.014927	0.024354	424
BMgn014972	0.014944	0.028208	425
BMgn009631	0.014975	0.024403	426
BMgn012094	0.015021	0.02988	427
BMgn008950	0.015022	0.024456	428
BMgn016507	0.015091	0.014993	429
BMgn007301	0.01511	0.028506	430
BMgn000618	0.015159	0.030088	431
BMgn008869	0.015211	0.015117	432
BMgn013806	0.015299	0.028811	433
BMgn016820	0.015304	0.028819	434
BMgn009209	0.01537	0.028948	435
BMgn017393	0.015441	0.029063	436
BMgn003113	0.01545	0.015355	437
BMgn003040	0.015469	0.029108	438
BMgn001425	0.015469	0.029108	439
BMgn011634	0.015473	0.015377	440
BMgn014110	0.015496	0.034922	441
BMgn013368	0.015512	0.029191	442
BMgn003239	0.015583	0.029323	443
BMgn006119	0.015632	0.030898	444
BMgn009065	0.015639	0.025033	445
BMgn013784	0.015832	0.015735	446
BMgn001022	0.015867	0.029829	447
BMgn010950	0.015876	0.025235	448
BMgn010707	0.015971	0.02533	449
BMgn005168	0.015999	0.015899	450
BMgn016745	0.016066	0.025406	451
BMgn005193	0.016221	0.030471	452
BMgn008069	0.016303	0.025614	453
BMgn015969	0.016322	0.036241	454
BMgn008913	0.016358	0.016261	455
BMgn013540	0.016576	0.032502	456
BMgn011453	0.016634	0.025894	457
BMgn016493	0.016635	0.032597	458
BMgn000584	0.016671	0.032659	459
BMgn015825	0.016725	0.031361	460
BMgn000420	0.016812	0.016753	461
BMgn007758	0.016824	0.02608	462
BMgn010445	0.016859	0.031588	463
BMgn011667	0.016898	0.031646	464
BMgn015374	0.017001	0.031826	465
BMgn003790	0.017051	0.016997	466
BMgn007851	0.017072	0.031934	467
BMgn006205	0.017075	0.017025	468
BMgn017444	0.017095	0.033373	469
BMgn003049	0.017095	0.033373	470
BMgn016453	0.017133	0.037499	471
BMgn004093	0.01717	0.017128	472
BMgn015912	0.017345	0.026544	473
BMgn004607	0.017355	0.032447	474
BMgn005933	0.017361	0.017312	475
BMgn005231	0.01738	0.032493	476
BMgn012434	0.017428	0.033929	477
BMgn003864	0.0176	0.034209	478
BMgn009469	0.01765	0.032978	479
BMgn007135	0.017653	0.044467	480
BMgn007621	0.017863	0.017807	481
BMgn010869	0.017889	0.034688	482
BMgn005183	0.017922	0.033459	483
BMgn010988	0.018034	0.034927	484
BMgn001996	0.018103	0.027225	485
BMgn013844	0.018121	0.033798	486
BMgn012297	0.01818	0.035169	487
BMgn007861	0.018293	0.018225	488
BMgn003003	0.018482	0.027559	489
BMgn006954	0.018487	0.035689	490
BMgn004129	0.018553	0.039782	491
BMgn010316	0.01856	0.034559	492
BMgn005980	0.018604	0.035875	493
BMgn002428	0.018624	0.027672	494
BMgn011232	0.018676	0.01864	495
BMgn007003	0.0187	0.018664	496
BMgn013574	0.018746	0.036113	497
BMgn001542	0.018772	0.034969	498
BMgn016963	0.018837	0.027877	499
BMgn010466	0.018934	0.036437	500
BMgn012506	0.018955	0.02798	501
BMgn014027	0.018975	0.036507	502
BMgn006760	0.019071	0.035478	503
BMgn002414	0.019092	0.035507	504
BMgn016457	0.019146	0.035586	505
BMgn007509	0.019197	0.035683	506
BMgn015410	0.019217	0.036925	507
BMgn015279	0.019266	0.040916	508
BMgn003805	0.019273	0.037018	509
BMgn005856	0.019287	0.028293	510
BMgn016279	0.019338	0.035922	511
BMgn005082	0.019369	0.019364	512
BMgn001647	0.019498	0.037427	513
BMgn015025	0.0195	0.02847	514
BMgn016299	0.019513	0.037448	515
BMgn000874	0.019527	0.036248	516
BMgn011168	0.019625	0.036434	517
BMgn016123	0.019665	0.028625	518
BMgn003505	0.01968	0.036528	519
BMgn002057	0.019688	0.037718	520
BMgn013422	0.019782	0.037871	521
BMgn000774	0.019807	0.02876	522
BMgn012593	0.019831	0.037963	523
BMgn016437	0.01997	0.038203	524
BMgn016168	0.020091	0.029014	525
BMgn000866	0.020138	0.029067	526
BMgn011014	0.020158	0.038529	527
BMgn013944	0.020233	0.029158	528
BMgn009910	0.02028	0.0292	529
BMgn007439	0.020328	0.029234	530
BMgn008532	0.020329	0.037711	531
BMgn010241	0.020353	0.037749	532
BMgn006528	0.020498	0.038038	533
BMgn012368	0.020509	0.038057	534
BMgn010676	0.020576	0.038186	535
BMgn005116	0.020611	0.020572	536
BMgn009696	0.020632	0.038273	537
BMgn010774	0.020753	0.038505	538
BMgn005094	0.020894	0.038755	539
BMgn003223	0.020911	0.039769	540
BMgn009014	0.021113	0.021037	541
BMgn001543	0.021116	0.039156	542
BMgn016794	0.021177	0.039265	543
BMgn010496	0.021207	0.039312	544
BMgn012041	0.021226	0.030054	545
BMgn007386	0.021265	0.040345	546
BMgn010149	0.021274	0.030084	547
BMgn016352	0.021355	0.039561	548
BMgn007262	0.021382	0.040527	549
BMgn017268	0.021389	0.039628	550
BMgn016486	0.021463	0.030249	551
BMgn015263	0.021499	0.044375	552
BMgn007940	0.02151	0.030295	553
BMgn013947	0.021571	0.039942	554
BMgn012257	0.021617	0.044576	555
BMgn016616	0.021628	0.030418	556
BMgn009537	0.021646	0.040075	557
BMgn001618	0.021646	0.040075	558
BMgn006889	0.021658	0.040992	559
BMgn004323	0.021742	0.040244	560
BMgn002987	0.021746	0.030529	561
BMgn017082	0.021763	0.044796	562
BMgn015164	0.021927	0.040584	563
BMgn001516	0.022095	0.040887	564
BMgn009348	0.022204	0.045477	565
BMgn015983	0.022294	0.042072	566
BMgn003710	0.022314	0.031068	567
BMgn010359	0.022392	0.045774	568
BMgn016023	0.022449	0.041499	569
BMgn006674	0.022503	0.042411	570
BMgn005384	0.022589	0.041729	571
BMgn001780	0.022589	0.041729	572
BMgn004009	0.022597	0.031347	573
BMgn010353	0.022597	0.031347	574
BMgn013887	0.022597	0.031347	575
BMgn016593	0.022666	0.022624	576
BMgn014968	0.022802	0.042118	577
BMgn000276	0.022881	0.031599	578
BMgn000259	0.022943	0.042365	579
BMgn001677	0.02302	0.043283	580
BMgn012054	0.02307	0.046839	581
BMgn014921	0.023084	0.042584	582
BMgn015656	0.023117	0.031804	583
BMgn016017	0.023164	0.03185	584
BMgn013267	0.023164	0.042722	585
BMgn005259	0.023225	0.042848	586
BMgn008758	0.023261	0.043696	587
BMgn011362	0.023321	0.043795	588
BMgn007617	0.023383	0.023323	589
BMgn005054	0.023447	0.032123	590
BMgn013440	0.023507	0.043322	591
BMgn000258	0.02352	0.043339	592
BMgn000411	0.023578	0.043436	593
BMgn013285	0.023589	0.032261	594
BMgn003146	0.023616	0.043505	595
BMgn009567	0.023636	0.032299	596
BMgn012271	0.023637	0.044314	597
BMgn013120	0.02367	0.02359	598
BMgn003295	0.023684	0.032341	599
BMgn001384	0.023694	0.047835	600
BMgn013124	0.023879	0.043977	601
BMgn009870	0.023919	0.04476	602
BMgn017435	0.024005	0.044197	603
BMgn002775	0.02402	0.044922	604
BMgn014691	0.02408	0.048406	605
BMgn001338	0.024114	0.048462	606
BMgn005294	0.024124	0.024013	607
BMgn007429	0.024142	0.044442	608
BMgn010559	0.024191	0.044516	609
BMgn000818	0.02425	0.032859	610
BMgn004659	0.024294	0.045397	611
BMgn010290	0.024385	0.044874	612
BMgn011660	0.024402	0.045591	613
BMgn014232	0.02441	0.048909	614
BMgn007571	0.02441	0.048909	615
BMgn002344	0.024482	0.045705	616
BMgn006221	0.024495	0.045075	617
BMgn004796	0.024565	0.045203	618
BMgn016678	0.024644	0.049256	619
BMgn000810	0.024662	0.024539	620
BMgn005058	0.024706	0.04545	621
BMgn001689	0.024711	0.046114	622
BMgn007307	0.024722	0.033264	623
BMgn002294	0.02477	0.046219	624
BMgn000269	0.024798	0.045608	625
BMgn008397	0.024864	0.033391	626
BMgn014986	0.024889	0.024787	627
BMgn005137	0.024921	0.046458	628
BMgn009392	0.024958	0.033496	629
BMgn004743	0.025008	0.024919	630
BMgn005710	0.0251	0.033633	631
BMgn011945	0.025157	0.050035	632
BMgn016916	0.02527	0.046459	633
BMgn002088	0.025275	0.047063	634
BMgn006539	0.025326	0.047154	635
BMgn008277	0.025341	0.046585	636
BMgn014931	0.025391	0.025293	637
BMgn003056	0.025411	0.046708	638
BMgn011136	0.025437	0.050485	639
BMgn007088	0.025482	0.046845	640
BMgn014510	0.025671	0.047139	641
BMgn008445	0.025693	0.047181	642
BMgn007743	0.025773	0.025681	643
BMgn013201	0.025893	0.025797	644
BMgn008692	0.026025	0.048312	645
BMgn004817	0.026091	0.034546	646
BMgn005934	0.026132	0.026039	647
BMgn016864	0.026187	0.051675	648
BMgn005836	0.026197	0.048598	649
BMgn001159	0.026232	0.034661	650
BMgn007694	0.026319	0.048246	651
BMgn000508	0.026326	0.034741	652
BMgn017451	0.026332	0.048264	653
BMgn002898	0.026347	0.026276	654
BMgn006689	0.026451	0.049018	655
BMgn007465	0.02652	0.0486	656
BMgn013730	0.026544	0.049174	657
BMgn007032	0.026568	0.04922	658
BMgn011533	0.026571	0.052273	659
BMgn002677	0.026586	0.026525	660
BMgn014607	0.026638	0.049332	661
BMgn007267	0.026656	0.035034	662
BMgn011253	0.026709	0.048939	663
BMgn000151	0.026747	0.048997	664
BMgn009571	0.026772	0.052614	665
BMgn007117	0.026845	0.0352	666
BMgn005264	0.026891	0.049228	667
BMgn015302	0.026907	0.049782	668
BMgn007404	0.026992	0.026914	669
BMgn008176	0.027006	0.052999	670
BMgn013164	0.027016	0.026936	671
BMgn015347	0.027057	0.053069	672
BMgn014967	0.027106	0.050104	673
BMgn012186	0.027123	0.053176	674
BMgn009489	0.027183	0.02711	675
BMgn011127	0.027186	0.050252	676
BMgn007552	0.027222	0.035541	677
BMgn016788	0.027313	0.049935	678
BMgn011398	0.027316	0.035627	679
BMgn011762	0.027319	0.049947	680
BMgn000514	0.02735	0.027265	681
BMgn014152	0.027473	0.053746	682
BMgn011495	0.027643	0.05105	683
BMgn006292	0.027646	0.035913	684
BMgn004419	0.027665	0.050536	685
BMgn008779	0.027668	0.051092	686
BMgn008417	0.027741	0.035994	687
BMgn015501	0.027757	0.027672	688
BMgn001537	0.027788	0.036038	689
BMgn015559	0.027857	0.050881	690
BMgn017541	0.027882	0.036122	691
BMgn013207	0.027902	0.051479	692
BMgn013337	0.027925	0.051516	693
BMgn014393	0.027928	0.054494	694
BMgn015716	0.027946	0.051039	695
BMgn008203	0.027976	0.036206	696
BMgn012529	0.028014	0.05166	697
BMgn012056	0.028042	0.051716	698
BMgn014901	0.028058	0.054698	699
BMgn008752	0.028071	0.03628	700
BMgn002801	0.028234	0.028154	701
BMgn001814	0.028259	0.036459	702
BMgn012895	0.028323	0.052166	703
BMgn000986	0.028426	0.028339	704
BMgn009095	0.028636	0.036802	705
BMgn013142	0.028683	0.036842	706
BMgn006049	0.028791	0.052532	707
BMgn004733	0.028974	0.052827	708
BMgn010938	0.029106	0.053048	709
BMgn007762	0.029138	0.053103	710
BMgn006612	0.029201	0.037311	711
BMgn003506	0.029212	0.053237	712
BMgn001844	0.029342	0.037434	713
BMgn013986	0.029389	0.053532	714
BMgn014139	0.029389	0.037479	715
BMgn015240	0.029484	0.037575	716
BMgn011800	0.029493	0.053694	717
BMgn015668	0.029514	0.053731	718
BMgn008006	0.029597	0.029515	719
BMgn001681	0.029625	0.0377	720
BMgn003687	0.029774	0.054204	721
BMgn004755	0.030085	0.055053	722
BMgn002114	0.030096	0.038113	723
BMgn008685	0.03024	0.058084	724
BMgn000252	0.030269	0.05535	725
BMgn000779	0.030284	0.038283	726
BMgn007025	0.030393	0.055207	727
BMgn009688	0.030406	0.055238	728
BMgn001157	0.030425	0.038419	729
BMgn002997	0.030425	0.038419	730
BMgn008249	0.030433	0.055272	731
BMgn006320	0.030477	0.055349	732
BMgn001472	0.030481	0.030363	733
BMgn006821	0.030553	0.030436	734
BMgn001599	0.030617	0.055587	735
BMgn014797	0.030753	0.056142	736
BMgn011133	0.030754	0.038708	737
BMgn007110	0.030828	0.055937	738
BMgn012373	0.030895	0.056373	739
BMgn002697	0.030896	0.038828	740
BMgn013098	0.030898	0.056081	741
BMgn008408	0.03099	0.038907	742
BMgn014192	0.031073	0.056374	743
BMgn015610	0.031078	0.030962	744
BMgn011441	0.031126	0.056741	745
BMgn008857	0.031131	0.039041	746
BMgn008362	0.031178	0.059564	747
BMgn015233	0.031179	0.056527	748
BMgn006217	0.031272	0.039176	749
BMgn010025	0.031406	0.057225	750
BMgn011490	0.03144	0.059961	751
BMgn003866	0.031459	0.056749	752
BMgn017429	0.03153	0.056805	753
BMgn014806	0.031715	0.057688	754
BMgn009974	0.03193	0.039786	755
BMgn002742	0.031986	0.031908	756
BMgn015748	0.032015	0.058164	757
BMgn003429	0.032071	0.039924	758
BMgn010461	0.032178	0.032108	759
BMgn012907	0.032246	0.058542	760
BMgn000327	0.032266	0.057405	761
BMgn014035	0.032288	0.058609	762
BMgn005551	0.032433	0.058849	763
BMgn004184	0.032506	0.058969	764
BMgn013151	0.032512	0.057604	765
BMgn006101	0.032512	0.032454	766
BMgn010051	0.032589	0.040397	767
BMgn014614	0.032604	0.061759	768
BMgn016521	0.032652	0.057722	769
BMgn013280	0.032655	0.032605	770
BMgn015088	0.032722	0.057778	771
BMgn002609	0.033003	0.058005	772
BMgn014876	0.033026	0.032987	773
BMgn015752	0.033038	0.059807	774
BMgn005478	0.033153	0.040916	775
BMgn008402	0.033181	0.033137	776
BMgn012028	0.033272	0.060182	777
BMgn016010	0.033353	0.058272	778
BMgn008321	0.033388	0.041158	779
BMgn016135	0.033418	0.063049	780
BMgn004345	0.033459	0.060503	781
BMgn009118	0.033482	0.041227	782
BMgn000162	0.033631	0.060777	783
BMgn001019	0.033755	0.033697	784
BMgn002025	0.033862	0.033799	785
BMgn005966	0.033924	0.061256	786
BMgn002258	0.034041	0.033972	787
BMgn001257	0.034054	0.058861	788
BMgn016692	0.034092	0.041774	789
BMgn016005	0.034113	0.034053	790
BMgn007150	0.034133	0.061608	791
BMgn001464	0.034203	0.061724	792
BMgn005019	0.034232	0.064273	793
BMgn003104	0.034296	0.061865	794
BMgn001070	0.034328	0.034252	795
BMgn009511	0.034334	0.059082	796
BMgn007627	0.034468	0.042093	797
BMgn013023	0.034483	0.062177	798
BMgn004218	0.034614	0.059313	799
BMgn016312	0.034728	0.065047	800
BMgn000526	0.034755	0.065077	801
BMgn007242	0.034762	0.06261	802
BMgn006132	0.034797	0.042365	803
BMgn004942	0.034806	0.034758	804
BMgn010463	0.034824	0.059484	805
BMgn014016	0.034894	0.05954	806
BMgn001132	0.034948	0.062917	807
BMgn003570	0.035034	0.059658	808
BMgn012909	0.035041	0.063081	809
BMgn007733	0.035079	0.042629	810
BMgn006156	0.035134	0.063229	811
BMgn005506	0.035204	0.063352	812
BMgn000817	0.035308	0.035268	813
BMgn016452	0.035332	0.035294	814
BMgn005015	0.035341	0.063579	815
BMgn002458	0.03536	0.042889	816
BMgn000517	0.035393	0.066115	817
BMgn007722	0.03544	0.063744	818
BMgn009480	0.035506	0.063848	819
BMgn011069	0.035524	0.060071	820
BMgn003087	0.035599	0.063994	821
BMgn012321	0.035642	0.043145	822
BMgn002826	0.035725	0.064204	823
BMgn000781	0.035736	0.043217	824
BMgn007279	0.035882	0.035807	825
BMgn002279	0.03597	0.04344	826
BMgn008479	0.036064	0.043522	827
BMgn013093	0.036168	0.036093	828
BMgn010377	0.036224	0.060634	829
BMgn007147	0.03623	0.065047	830
BMgn009674	0.036299	0.043721	831
BMgn015722	0.036309	0.065173	832
BMgn002640	0.036312	0.036231	833
BMgn010347	0.036438	0.067749	834
BMgn002221	0.036504	0.060849	835
BMgn004228	0.036557	0.043953	836
BMgn004010	0.036557	0.043953	837
BMgn013070	0.036557	0.043953	838
BMgn015901	0.036622	0.036552	839
BMgn015091	0.036643	0.060958	840
BMgn008935	0.036713	0.061022	841
BMgn011315	0.036768	0.044135	842
BMgn003185	0.036837	0.036738	843
BMgn011604	0.036909	0.044274	844
BMgn012629	0.036993	0.061231	845
BMgn012447	0.036994	0.06628	846
BMgn008670	0.03719	0.044516	847
BMgn016531	0.037249	0.066704	848
BMgn017378	0.037268	0.0372	849
BMgn010908	0.037319	0.066818	850
BMgn016462	0.037331	0.044652	851
BMgn015266	0.037365	0.069152	852
BMgn013642	0.037458	0.06704	853
BMgn000081	0.037471	0.044778	854
BMgn014427	0.037552	0.061663	855
BMgn017025	0.037597	0.069503	856
BMgn004893	0.037612	0.04492	857
BMgn002549	0.037622	0.061716	858
BMgn014078	0.037626	0.037565	859
BMgn016436	0.03765	0.037584	860
BMgn001258	0.037659	0.044956	861
BMgn007877	0.037692	0.061788	862
BMgn011254	0.037732	0.067484	863
BMgn010015	0.037762	0.061843	864
BMgn011566	0.037877	0.03782	865
BMgn009745	0.03794	0.045229	866
BMgn013471	0.038081	0.045369	867
BMgn006926	0.038176	0.038096	868
BMgn006523	0.038181	0.062209	869
BMgn014296	0.038294	0.068398	870
BMgn007569	0.038367	0.038272	871
BMgn010324	0.038387	0.06855	872
BMgn007972	0.0386	0.062541	873
BMgn008748	0.03869	0.045965	874
BMgn000554	0.038769	0.069166	875
BMgn013462	0.03881	0.062705	876
BMgn012578	0.038924	0.04618	877
BMgn010486	0.038949	0.062818	878
BMgn002561	0.039019	0.062881	879
BMgn003990	0.039228	0.063045	880
BMgn014103	0.039228	0.063045	881
BMgn008536	0.03944	0.046657	882
BMgn010108	0.039446	0.070263	883
BMgn007597	0.03945	0.072424	884
BMgn017381	0.039508	0.063275	885
BMgn004700	0.039533	0.04674	886
BMgn011170	0.039591	0.070521	887
BMgn012966	0.03961	0.039515	888
BMgn007011	0.039797	0.070862	889
BMgn011452	0.039908	0.047126	890
BMgn003017	0.040016	0.03991	891
BMgn016574	0.040016	0.03991	892
BMgn002093	0.040016	0.03991	893
BMgn008168	0.040028	0.07333	894
BMgn016952	0.040255	0.040171	895
BMgn003841	0.04033	0.047499	896
BMgn008832	0.040345	0.063954	897
BMgn006976	0.040691	0.072353	898
BMgn014043	0.040704	0.047846	899
BMgn003386	0.040706	0.072376	900
BMgn008164	0.040722	0.074415	901
BMgn011960	0.040751	0.047897	902
BMgn003804	0.040763	0.064301	903
BMgn015419	0.04082	0.07455	904
BMgn000479	0.040837	0.072574	905
BMgn016701	0.041007	0.064501	906
BMgn016029	0.041043	0.040938	907
BMgn015526	0.041079	0.048195	908
BMgn009402	0.041091	0.040988	909
BMgn010014	0.041282	0.041196	910
BMgn012646	0.0413	0.075332	911
BMgn010300	0.041306	0.041222	912
BMgn008013	0.041354	0.041277	913
BMgn000680	0.041359	0.048452	914
BMgn007608	0.041382	0.073454	915
BMgn012146	0.04143	0.07555	916
BMgn012730	0.041453	0.048536	917
BMgn009555	0.041632	0.073849	918
BMgn007540	0.041646	0.07589	919
BMgn014497	0.041734	0.048794	920
BMgn004428	0.041948	0.065286	921
BMgn011763	0.041999	0.04192	922
BMgn017040	0.042018	0.065342	923
BMgn003957	0.042131	0.049164	924
BMgn007659	0.042157	0.065449	925
BMgn002808	0.042227	0.06551	926
BMgn006456	0.04228	0.074875	927
BMgn012862	0.042286	0.042217	928
BMgn016467	0.042295	0.049305	929
BMgn003338	0.042366	0.065631	930
BMgn006473	0.042429	0.042369	931
BMgn008619	0.042489	0.042424	932
BMgn003099	0.042529	0.04951	933
BMgn001079	0.042576	0.04955	934
BMgn002339	0.042622	0.049596	935
BMgn001446	0.042716	0.042652	936
BMgn009653	0.042789	0.075733	937
BMgn010832	0.042923	0.066102	938
BMgn006020	0.042923	0.066102	939
BMgn017027	0.04317	0.043128	940
BMgn013618	0.04323	0.050155	941
BMgn000350	0.043271	0.066373	942
BMgn004555	0.043288	0.082888	943
BMgn003532	0.043315	0.076561	944
BMgn005445	0.043341	0.066443	945
BMgn003797	0.043411	0.066496	946
BMgn004701	0.043465	0.076812	947
BMgn014603	0.043482	0.076852	948
BMgn004267	0.043619	0.066665	949
BMgn015104	0.043708	0.043654	950
BMgn013509	0.043744	0.05062	951
BMgn008084	0.043874	0.077484	952
BMgn006076	0.044007	0.043945	953
BMgn000003	0.044025	0.050879	954
BMgn006544	0.044072	0.050918	955
BMgn016869	0.044314	0.078176	956
BMgn012609	0.044341	0.044295	957
BMgn003911	0.044406	0.078317	958
BMgn001748	0.044445	0.051264	959
BMgn015383	0.04453	0.080455	960
BMgn011741	0.044539	0.080465	961
BMgn000076	0.04458	0.044545	962
BMgn010367	0.044586	0.051405	963
BMgn002140	0.044632	0.051447	964
BMgn011914	0.044677	0.080674	965
BMgn007575	0.044684	0.078768	966
BMgn006423	0.044684	0.078768	967
BMgn001024	0.044732	0.067569	968
BMgn010062	0.044787	0.080839	969
BMgn016052	0.044819	0.044803	970
BMgn009107	0.044936	0.079166	971
BMgn003197	0.044959	0.051736	972
BMgn000237	0.044979	0.081121	973
BMgn016470	0.045011	0.067803	974
BMgn007759	0.045045	0.079338	975
BMgn015054	0.045154	0.079498	976
BMgn009236	0.045264	0.079666	977
BMgn017353	0.045285	0.079698	978
BMgn014752	0.045289	0.068038	979
BMgn008136	0.045289	0.068038	980
BMgn001988	0.045297	0.045303	981
BMgn016546	0.04533	0.079767	982
BMgn014881	0.045451	0.081865	983
BMgn008044	0.04546	0.079979	984
BMgn009604	0.045512	0.045535	985
BMgn015852	0.04552	0.052237	986
BMgn012973	0.045607	0.080197	987
BMgn005791	0.0458	0.052511	988
BMgn016804	0.045823	0.045806	989
BMgn006314	0.045833	0.080585	990
BMgn009734	0.046053	0.080938	991
BMgn003245	0.04608	0.052764	992
BMgn006907	0.046121	0.046091	993
BMgn000934	0.046173	0.052846	994
BMgn002084	0.046192	0.068763	995
BMgn010478	0.046407	0.05304	996
BMgn000890	0.0465	0.053126	997
BMgn012854	0.046678	0.069189	998
BMgn001245	0.046886	0.069357	999
BMgn017547	0.046898	0.08226	1000
BMgn015472	0.047083	0.082548	1001
BMgn016976	0.047107	0.053666	1002
BMgn008722	0.047137	0.082632	1003
BMgn001167	0.047153	0.053717	1004
BMgn015489	0.047247	0.053799	1005
BMgn011259	0.047267	0.08283	1006
BMgn016021	0.047292	0.084652	1007
BMgn007218	0.047303	0.069703	1008
BMgn015805	0.047363	0.053905	1009
BMgn000260	0.047363	0.053905	1010
BMgn004314	0.047424	0.047413	1011
BMgn005301	0.047431	0.084857	1012
BMgn013759	0.047573	0.054091	1013
BMgn016728	0.04765	0.069975	1014
BMgn005063	0.047666	0.054166	1015
BMgn012017	0.047666	0.054166	1016
BMgn011857	0.047858	0.070157	1017
BMgn014522	0.0479	0.054345	1018
BMgn016469	0.048097	0.084097	1019
BMgn003880	0.048136	0.070406	1020
BMgn008639	0.048189	0.084249	1021
BMgn006407	0.048222	0.086151	1022
BMgn004455	0.048281	0.084394	1023
BMgn014107	0.048344	0.070576	1024
BMgn006191	0.048366	0.054783	1025
BMgn014677	0.048412	0.054821	1026
BMgn001239	0.048599	0.054979	1027
BMgn016861	0.048646	0.055021	1028
BMgn012119	0.048714	0.048753	1029
BMgn014947	0.048716	0.055084	1030
BMgn002869	0.04876	0.070923	1031
BMgn008396	0.048762	0.086948	1032
BMgn011551	0.048906	0.048947	1033
BMgn012932	0.048908	0.085381	1034
BMgn001161	0.048925	0.085409	1035
BMgn000503	0.048929	0.048969	1036
BMgn011320	0.048978	0.091125	1037
BMgn000091	0.049018	0.055379	1038
BMgn009360	0.049065	0.055419	1039
BMgn000087	0.049066	0.085633	1040
BMgn005951	0.049107	0.071223	1041
BMgn015171	0.049144	0.049209	1042
BMgn002029	0.0493	0.049376	1043
BMgn014244	0.049384	0.071453	1044
BMgn000885	0.049386	0.086171	1045
BMgn002591	0.049453	0.07152	1046
BMgn015065	0.049478	0.086328	1047
BMgn012075	0.049662	0.086623	1048
BMgn005368	0.049717	0.056035	1049
BMgn001085	0.04973	0.071761	1050
BMgn005865	0.049764	0.056087	1051
BMgn007517	0.049769	0.086812	1052
BMgn015633	0.04995	0.056249	1053
BMgn004112	0.050044	0.056324	1054
BMgn014763	0.050179	0.087437	1055
BMgn013184	0.050215	0.072142	1056
BMgn005477	0.050305	0.08766	1057
BMgn010394	0.050411	0.050457	1058
BMgn001757	0.050509	0.056753	1059
BMgn015855	0.050562	0.072411	1060
BMgn001924	0.050698	0.050735	1061
BMgn009163	0.050728	0.088342	1062
BMgn004856	0.050735	0.090011	1063
BMgn009792	0.050769	0.050809	1064
BMgn016018	0.050973	0.051009	1065
BMgn011429	0.051041	0.088832	1066
BMgn007367	0.051068	0.057267	1067
BMgn001498	0.051104	0.05115	1068
BMgn001313	0.051116	0.072863	1069
BMgn001445	0.051278	0.057456	1070
BMgn014617	0.051347	0.057532	1071
BMgn010333	0.051462	0.073157	1072
BMgn001447	0.051531	0.073212	1073
BMgn010536	0.0516	0.073272	1074
BMgn007930	0.051627	0.057772	1075
BMgn014526	0.05163	0.051704	1076
BMgn010297	0.051645	0.091429	1077
BMgn017100	0.05172	0.057866	1078
BMgn009454	0.051906	0.058027	1079
BMgn013652	0.051908	0.091843	1080
BMgn014777	0.051995	0.091964	1081
BMgn015869	0.052084	0.052135	1082
BMgn007671	0.052084	0.052135	1083
BMgn016702	0.052092	0.058206	1084
BMgn005800	0.052143	0.090594	1085
BMgn016397	0.052232	0.058331	1086
BMgn004690	0.052235	0.090735	1087
BMgn013185	0.052325	0.058408	1088
BMgn016886	0.052367	0.090957	1089
BMgn000017	0.052371	0.052415	1090
BMgn005379	0.052419	0.091035	1091
BMgn017199	0.052557	0.058625	1092
BMgn015242	0.052598	0.052653	1093
BMgn010866	0.052647	0.096424	1094
BMgn004923	0.052651	0.09643	1095
BMgn002914	0.052707	0.074193	1096
BMgn011089	0.052786	0.091631	1097
BMgn015309	0.052837	0.058884	1098
BMgn009627	0.052999	0.059023	1099
BMgn007107	0.053053	0.074476	1100
BMgn001802	0.053153	0.092204	1101
BMgn015328	0.053371	0.092568	1102
BMgn004351	0.053469	0.097636	1103
BMgn006667	0.053495	0.094269	1104
BMgn012187	0.05372	0.059701	1105
BMgn002853	0.053733	0.053754	1106
BMgn011545	0.053996	0.054	1107
BMgn010218	0.053999	0.095077	1108
BMgn000566	0.054046	0.060012	1109
BMgn011373	0.054088	0.095222	1110
BMgn000681	0.054089	0.075356	1111
BMgn012357	0.054099	0.093784	1112
BMgn011194	0.054115	0.054111	1113
BMgn006377	0.054163	0.05416	1114
BMgn017269	0.054168	0.095333	1115
BMgn007570	0.054231	0.060187	1116
BMgn007410	0.054278	0.060229	1117
BMgn017555	0.054299	0.094116	1118
BMgn006312	0.054299	0.094116	1119
BMgn005922	0.054331	0.075551	1120
BMgn008273	0.054331	0.075551	1121
BMgn014948	0.054331	0.075551	1122
BMgn011845	0.054347	0.094195	1123
BMgn016588	0.054347	0.094195	1124
BMgn015766	0.054354	0.054327	1125
BMgn005156	0.054426	0.054393	1126
BMgn016064	0.054603	0.060543	1127
BMgn001642	0.05465	0.060593	1128
BMgn006695	0.054929	0.060858	1129
BMgn008461	0.05495	0.095176	1130
BMgn017279	0.054975	0.054924	1131
BMgn004697	0.055045	0.09532	1132
BMgn000571	0.055207	0.061121	1133
BMgn016637	0.055261	0.095648	1134
BMgn000646	0.05533	0.095743	1135
BMgn000958	0.055477	0.055409	1136
BMgn000577	0.055539	0.076583	1137
BMgn016657	0.055579	0.061438	1138
BMgn003206	0.055645	0.055566	1139
BMgn009831	0.055746	0.076744	1140
BMgn003133	0.055883	0.05582	1141
BMgn007234	0.055932	0.10125	1142
BMgn002326	0.055995	0.09821	1143
BMgn003037	0.056003	0.055934	1144
BMgn002035	0.056136	0.061927	1145
BMgn007797	0.056214	0.098544	1146
BMgn004739	0.056242	0.056164	1147
BMgn000688	0.056298	0.077172	1148
BMgn002365	0.056457	0.056385	1149
BMgn005050	0.056476	0.097574	1150
BMgn002575	0.0566	0.05653	1151
BMgn009079	0.056712	0.07752	1152
BMgn012782	0.056812	0.098115	1153
BMgn003094	0.056818	0.098121	1154
BMgn003751	0.056818	0.098121	1155
BMgn006708	0.05685	0.07763	1156
BMgn009411	0.056879	0.062623	1157
BMgn001163	0.057054	0.057001	1158
BMgn014530	0.057184	0.098696	1159
BMgn000168	0.057198	0.057148	1160
BMgn015340	0.057263	0.077966	1161
BMgn012713	0.057401	0.078072	1162
BMgn007159	0.057413	0.057364	1163
BMgn003626	0.057556	0.057516	1164
BMgn009790	0.05758	0.057543	1165
BMgn017234	0.057598	0.063294	1166
BMgn013078	0.057625	0.1007	1167
BMgn005652	0.057641	0.099437	1168
BMgn016754	0.057668	0.063353	1169
BMgn005432	0.057746	0.078349	1170
BMgn008317	0.057761	0.063431	1171
BMgn014479	0.057792	0.10096	1172
BMgn012775	0.057853	0.063512	1173
BMgn007005	0.057993	0.063634	1174
BMgn007893	0.058006	0.099984	1175
BMgn008360	0.058021	0.078599	1176
BMgn015154	0.058317	0.06393	1177
BMgn002316	0.058366	0.078881	1178
BMgn014631	0.058646	0.10046	1179
BMgn011658	0.058679	0.058633	1180
BMgn002130	0.058703	0.058655	1181
BMgn014860	0.058739	0.058694	1182
BMgn011466	0.058779	0.079196	1183
BMgn010141	0.058829	0.1006	1184
BMgn008938	0.058917	0.079317	1185
BMgn017421	0.05892	0.10067	1186
BMgn006575	0.059072	0.10296	1187
BMgn015826	0.059123	0.079485	1188
BMgn011239	0.059152	0.064702	1189
BMgn010714	0.059181	0.059127	1190
BMgn016042	0.059245	0.06478	1191
BMgn011677	0.059337	0.064854	1192
BMgn004816	0.059377	0.10102	1193
BMgn010212	0.059384	0.064891	1194
BMgn001068	0.059467	0.079796	1195
BMgn013781	0.059611	0.059589	1196
BMgn004693	0.059615	0.065099	1197
BMgn008800	0.059674	0.079967	1198
BMgn014551	0.059743	0.080012	1199
BMgn012929	0.059847	0.065307	1200
BMgn014074	0.059894	0.065348	1201
BMgn009332	0.060006	0.10444	1202
BMgn000470	0.060042	0.060034	1203
BMgn001242	0.060113	0.060103	1204
BMgn008520	0.060224	0.080422	1205
BMgn001949	0.060289	0.10169	1206
BMgn003119	0.060293	0.080473	1207
BMgn003703	0.060362	0.080533	1208
BMgn003517	0.060639	0.060642	1209
BMgn017314	0.060654	0.10195	1210
BMgn012402	0.060745	0.10202	1211
BMgn000043	0.060842	0.060842	1212
BMgn005304	0.060912	0.080993	1213
BMgn003910	0.060913	0.066281	1214
BMgn005299	0.060928	0.10216	1215
BMgn003077	0.060974	0.060971	1216
BMgn007831	0.061049	0.081104	1217
BMgn012367	0.061098	0.066428	1218
BMgn015524	0.061119	0.10615	1219
BMgn015835	0.061144	0.06647	1220
BMgn010081	0.061165	0.061161	1221
BMgn009979	0.061213	0.061211	1222
BMgn010165	0.061237	0.066552	1223
BMgn011418	0.061475	0.10257	1224
BMgn011306	0.061625	0.1069	1225
BMgn007578	0.061631	0.066937	1226
BMgn011065	0.061668	0.081593	1227
BMgn002786	0.061918	0.06189	1228
BMgn006268	0.06197	0.10744	1229
BMgn008961	0.062024	0.067284	1230
BMgn014012	0.06208	0.081937	1231
BMgn006540	0.062117	0.067375	1232
BMgn001278	0.062168	0.062134	1233
BMgn000267	0.062216	0.062197	1234
BMgn007293	0.062218	0.082058	1235
BMgn017273	0.062286	0.082108	1236
BMgn014409	0.062302	0.067555	1237
BMgn001563	0.062348	0.067605	1238
BMgn011588	0.062384	0.062362	1239
BMgn013088	0.062441	0.067684	1240
BMgn017236	0.062527	0.082309	1241
BMgn010131	0.062575	0.062539	1242
BMgn007467	0.062595	0.10839	1243
BMgn009704	0.06263	0.082391	1244
BMgn010652	0.062904	0.082609	1245
BMgn000947	0.062933	0.062885	1246
BMgn007833	0.062996	0.068228	1247
BMgn011436	0.063008	0.10902	1248
BMgn005973	0.063042	0.08273	1249
BMgn004510	0.063181	0.068401	1250
BMgn016094	0.063205	0.10387	1251
BMgn012390	0.063316	0.082937	1252
BMgn014557	0.063387	0.10401	1253
BMgn001301	0.063478	0.10409	1254
BMgn002388	0.063591	0.08315	1255
BMgn010851	0.063641	0.11	1256
BMgn007500	0.063659	0.083211	1257
BMgn004556	0.063672	0.11006	1258
BMgn012560	0.063728	0.083262	1259
BMgn008430	0.063751	0.1043	1260
BMgn011996	0.063913	0.063896	1261
BMgn003226	0.063921	0.06907	1262
BMgn016304	0.064032	0.064023	1263
BMgn006425	0.064037	0.083485	1264
BMgn016061	0.064206	0.10465	1265
BMgn008151	0.064277	0.083684	1266
BMgn008341	0.064383	0.069493	1267
BMgn001014	0.064463	0.064462	1268
BMgn001108	0.064476	0.069592	1269
BMgn000884	0.06462	0.083981	1270
BMgn014034	0.06462	0.083981	1271
BMgn010041	0.06462	0.083981	1272
BMgn004066	0.064661	0.10501	1273
BMgn000244	0.064678	0.064696	1274
BMgn006031	0.064753	0.069853	1275
BMgn010404	0.064773	0.064793	1276
BMgn005828	0.064961	0.070056	1277
BMgn015604	0.064962	0.084281	1278
BMgn002913	0.064988	0.065005	1279
BMgn012888	0.065051	0.11442	1280
BMgn015232	0.065077	0.070164	1281
BMgn005186	0.065099	0.084395	1282
BMgn000246	0.065215	0.070289	1283
BMgn013951	0.065308	0.070368	1284
BMgn015455	0.065347	0.065384	1285
BMgn015402	0.065347	0.065384	1286
BMgn010068	0.065428	0.11268	1287
BMgn007378	0.065442	0.084708	1288
BMgn000462	0.065446	0.070489	1289
BMgn013436	0.065511	0.08477	1290
BMgn006547	0.065514	0.065541	1291
BMgn013994	0.065618	0.11299	1292
BMgn001706	0.065648	0.084869	1293
BMgn012663	0.065654	0.11303	1294
BMgn013087	0.06577	0.070799	1295
BMgn004502	0.065785	0.084998	1296
BMgn001133	0.065816	0.070845	1297
BMgn016718	0.065862	0.07089	1298
BMgn012817	0.065933	0.10601	1299
BMgn007076	0.065944	0.065979	1300
BMgn006807	0.06599	0.085168	1301
BMgn009860	0.066115	0.10614	1302
BMgn012274	0.066139	0.071146	1303
BMgn012410	0.06622	0.11387	1304
BMgn016932	0.066232	0.07123	1305
BMgn014179	0.066386	0.066442	1306
BMgn008506	0.066401	0.08554	1307
BMgn005453	0.066589	0.066649	1308
BMgn017155	0.066613	0.066669	1309
BMgn010706	0.066659	0.10656	1310
BMgn001422	0.066757	0.066813	1311
BMgn008927	0.067017	0.086064	1312
BMgn002520	0.067109	0.072048	1313
BMgn003161	0.067113	0.1069	1314
BMgn008246	0.067115	0.06716	1315
BMgn008007	0.067133	0.11525	1316
BMgn012891	0.067155	0.072092	1317
BMgn016100	0.067175	0.067219	1318
BMgn001081	0.067201	0.072129	1319
BMgn016226	0.067293	0.072216	1320
BMgn002966	0.06736	0.086358	1321
BMgn006684	0.067428	0.086407	1322
BMgn006742	0.06745	0.067467	1323
BMgn002653	0.067476	0.10718	1324
BMgn001271	0.067545	0.06756	1325
BMgn000131	0.067569	0.067581	1326
BMgn015919	0.067668	0.08659	1327
BMgn013008	0.067668	0.08659	1328
BMgn016592	0.067709	0.072582	1329
BMgn000270	0.067755	0.072621	1330
BMgn015831	0.067801	0.072665	1331
BMgn001598	0.067803	0.11625	1332
BMgn001404	0.067839	0.10745	1333
BMgn005713	0.06793	0.10751	1334
BMgn013896	0.067963	0.072814	1335
BMgn009381	0.068141	0.11674	1336
BMgn010705	0.068382	0.068393	1337
BMgn008850	0.068383	0.10785	1338
BMgn003364	0.068386	0.087158	1339
BMgn014746	0.068429	0.06844	1340
BMgn002213	0.068585	0.073426	1341
BMgn016849	0.068585	0.073426	1342
BMgn007901	0.068591	0.087342	1343
BMgn011202	0.068645	0.068649	1344
BMgn004144	0.068659	0.087402	1345
BMgn004586	0.068816	0.073659	1346
BMgn000074	0.068819	0.11778	1347
BMgn006092	0.068864	0.087557	1348
BMgn013111	0.068976	0.1201	1349
BMgn005034	0.069075	0.069082	1350
BMgn012480	0.069086	0.11819	1351
BMgn014832	0.069108	0.10837	1352
BMgn011982	0.069122	0.069132	1353
BMgn002513	0.069289	0.1085	1354
BMgn001541	0.069323	0.07414	1355
BMgn010546	0.069379	0.10857	1356
BMgn001458	0.069481	0.069498	1357
BMgn002268	0.069545	0.11887	1358
BMgn003213	0.069554	0.074351	1359
BMgn010321	0.069616	0.088193	1360
BMgn011652	0.069738	0.07453	1361
BMgn014385	0.069742	0.10885	1362
BMgn001345	0.06978	0.06977	1363
BMgn003323	0.06983	0.074615	1364
BMgn014651	0.069832	0.10892	1365
BMgn002708	0.06984	0.11932	1366
BMgn001656	0.069958	0.08847	1367
BMgn003310	0.070107	0.074877	1368
BMgn011567	0.070197	0.088667	1369
BMgn010332	0.070199	0.074956	1370
BMgn006260	0.070285	0.10927	1371
BMgn002393	0.070337	0.075082	1372
BMgn016839	0.070367	0.088805	1373
BMgn003695	0.070413	0.07037	1374
BMgn001832	0.070466	0.10942	1375
BMgn010815	0.07051	0.12032	1376
BMgn000686	0.070522	0.075254	1377
BMgn002650	0.070568	0.0753	1378
BMgn004958	0.070581	0.12043	1379
BMgn005899	0.070737	0.10962	1380
BMgn008155	0.070777	0.089166	1381
BMgn012168	0.070845	0.089218	1382
BMgn003698	0.070891	0.070882	1383
BMgn006800	0.070914	0.089266	1384
BMgn009341	0.070936	0.075633	1385
BMgn014449	0.070986	0.070972	1386
BMgn001705	0.071009	0.10981	1387
BMgn006888	0.07105	0.089374	1388
BMgn006164	0.071058	0.071052	1389
BMgn005850	0.071099	0.10988	1390
BMgn003676	0.071118	0.089436	1391
BMgn015411	0.071187	0.089488	1392
BMgn017602	0.071259	0.07594	1393
BMgn002301	0.071426	0.089699	1394
BMgn008960	0.071426	0.089699	1395
BMgn005111	0.071584	0.071553	1396
BMgn005329	0.071715	0.071693	1397
BMgn002079	0.071801	0.090018	1398
BMgn014429	0.071809	0.12423	1399
BMgn016106	0.071871	0.071838	1400
BMgn000343	0.07195	0.07657	1401
BMgn003324	0.07199	0.071945	1402
BMgn010525	0.07211	0.072067	1403
BMgn013153	0.07218	0.076785	1404
BMgn001371	0.072272	0.076872	1405
BMgn000987	0.072274	0.11076	1406
BMgn007456	0.072389	0.12321	1407
BMgn000031	0.072396	0.072367	1408
BMgn010730	0.072422	0.12326	1409
BMgn000271	0.072545	0.11098	1410
BMgn008974	0.072564	0.072538	1411
BMgn014940	0.07264	0.077215	1412
BMgn010133	0.072755	0.072735	1413
BMgn003127	0.072756	0.090836	1414
BMgn007810	0.072816	0.11119	1415
BMgn003222	0.072874	0.07286	1416
BMgn011092	0.073008	0.07755	1417
BMgn011352	0.073028	0.091057	1418
BMgn012845	0.073089	0.073053	1419
BMgn003471	0.073161	0.073134	1420
BMgn007399	0.073178	0.11147	1421
BMgn001334	0.073192	0.077736	1422
BMgn013506	0.073233	0.091212	1423
BMgn001790	0.073238	0.077782	1424
BMgn017364	0.073284	0.077822	1425
BMgn002864	0.073301	0.091261	1426
BMgn005359	0.073376	0.07791	1427
BMgn011832	0.073403	0.091349	1428
BMgn006961	0.073505	0.091449	1429
BMgn015291	0.07356	0.078071	1430
BMgn013500	0.073606	0.078115	1431
BMgn003033	0.073639	0.073617	1432
BMgn003916	0.073639	0.073617	1433
BMgn011035	0.073652	0.078153	1434
BMgn011968	0.073719	0.11187	1435
BMgn001037	0.073744	0.078239	1436
BMgn012726	0.07399	0.11209	1437
BMgn003547	0.07417	0.11223	1438
BMgn006524	0.074189	0.074167	1439
BMgn014979	0.074261	0.11229	1440
BMgn013800	0.074319	0.078748	1441
BMgn007839	0.074319	0.078748	1442
BMgn003889	0.074391	0.092206	1443
BMgn017583	0.074428	0.074392	1444
BMgn004934	0.074531	0.1125	1445
BMgn002534	0.074561	0.092353	1446
BMgn010629	0.074561	0.092353	1447
BMgn005640	0.074561	0.092353	1448
BMgn013383	0.074731	0.09251	1449
BMgn005460	0.074802	0.1127	1450
BMgn004729	0.074802	0.079211	1451
BMgn016640	0.074848	0.079247	1452
BMgn013438	0.07494	0.079338	1453
BMgn005885	0.074977	0.074936	1454
BMgn017449	0.074982	0.11285	1455
BMgn013079	0.075139	0.092829	1456
BMgn014438	0.075141	0.12739	1457
BMgn002590	0.07517	0.079552	1458
BMgn000535	0.075207	0.092901	1459
BMgn012236	0.075253	0.11305	1460
BMgn001727	0.075523	0.11325	1461
BMgn004719	0.075581	0.12805	1462
BMgn009900	0.075629	0.080026	1463
BMgn016957	0.07567	0.075631	1464
BMgn006203	0.075721	0.080127	1465
BMgn012076	0.075767	0.080169	1466
BMgn005766	0.075813	0.080215	1467
BMgn000553	0.07582	0.093434	1468
BMgn008078	0.075886	0.1285	1469
BMgn015433	0.075905	0.080291	1470
BMgn005995	0.075974	0.11362	1471
BMgn004781	0.07616	0.093736	1472
BMgn014540	0.076181	0.080567	1473
BMgn001376	0.076227	0.080618	1474
BMgn002177	0.076316	0.07631	1475
BMgn012847	0.076364	0.080746	1476
BMgn007696	0.076411	0.076415	1477
BMgn016341	0.076456	0.080824	1478
BMgn017338	0.076514	0.11404	1479
BMgn013614	0.076636	0.094147	1480
BMgn014519	0.076734	0.076746	1481
BMgn011154	0.076734	0.076746	1482
BMgn016409	0.076784	0.11423	1483
BMgn007258	0.07687	0.081176	1484
BMgn013322	0.076874	0.1143	1485
BMgn004072	0.076964	0.11437	1486
BMgn015178	0.076992	0.13016	1487
BMgn007690	0.077028	0.13021	1488
BMgn010214	0.077044	0.094479	1489
BMgn002345	0.07714	0.1304	1490
BMgn007197	0.077179	0.13045	1491
BMgn001946	0.07718	0.094607	1492
BMgn014448	0.077234	0.11457	1493
BMgn004388	0.077247	0.094666	1494
BMgn013545	0.077309	0.13066	1495
BMgn002061	0.077375	0.081643	1496
BMgn001269	0.077519	0.094905	1497
BMgn016055	0.077587	0.094962	1498
BMgn000653	0.077696	0.081936	1499
BMgn006386	0.077723	0.1328	1500
BMgn007178	0.077864	0.11503	1501
BMgn013585	0.07788	0.082108	1502
BMgn011005	0.077941	0.077991	1503
BMgn015883	0.078063	0.095394	1504
BMgn000907	0.078063	0.095394	1505
BMgn004193	0.078063	0.095394	1506
BMgn001041	0.078201	0.082396	1507
BMgn006573	0.078224	0.11531	1508
BMgn003719	0.078224	0.11531	1509
BMgn004202	0.078323	0.07838	1510
BMgn014539	0.078404	0.11545	1511
BMgn017126	0.078418	0.07848	1512
BMgn012237	0.07843	0.082614	1513
BMgn013014	0.078436	0.095702	1514
BMgn004699	0.078583	0.11558	1515
BMgn013059	0.078673	0.11565	1516
BMgn014265	0.078674	0.095929	1517
BMgn011316	0.078706	0.082872	1518
BMgn011406	0.078742	0.095991	1519
BMgn005972	0.078797	0.082974	1520
BMgn016760	0.078801	0.078857	1521
BMgn016196	0.078945	0.096178	1522
BMgn011295	0.079013	0.09623	1523
BMgn011870	0.079081	0.096286	1524
BMgn007948	0.079095	0.083242	1525
BMgn002229	0.079123	0.11599	1526
BMgn015300	0.079149	0.09634	1527
BMgn001723	0.079169	0.13343	1528
BMgn004996	0.079207	0.079273	1529
BMgn005236	0.079392	0.11619	1530
BMgn009621	0.07947	0.079567	1531
BMgn017312	0.079613	0.079702	1532
BMgn000557	0.079759	0.096858	1533
BMgn016511	0.079828	0.079908	1534
BMgn013183	0.079852	0.083923	1535
BMgn012660	0.080021	0.11664	1536
BMgn010273	0.080031	0.097091	1537
BMgn005835	0.080111	0.11671	1538
BMgn000084	0.080163	0.080227	1539
BMgn005469	0.080274	0.13515	1540
BMgn011427	0.080505	0.097503	1541
BMgn001433	0.080521	0.08058	1542
BMgn001791	0.080573	0.097566	1543
BMgn004991	0.080617	0.080661	1544
BMgn000233	0.080641	0.080687	1545
BMgn011176	0.080649	0.11711	1546
BMgn016220	0.080709	0.097666	1547
BMgn005246	0.080713	0.080758	1548
BMgn012315	0.080772	0.080814	1549
BMgn000830	0.080829	0.11724	1550
BMgn010645	0.081047	0.097945	1551
BMgn004558	0.081098	0.11745	1552
BMgn008319	0.081135	0.085114	1553
BMgn004328	0.081181	0.085164	1554
BMgn016173	0.081227	0.085205	1555
BMgn004490	0.081319	0.098195	1556
BMgn006735	0.081367	0.11768	1557
BMgn012084	0.081406	0.081443	1558
BMgn003782	0.08141	0.085382	1559
BMgn014364	0.081502	0.085473	1560
BMgn009186	0.081522	0.098357	1561
BMgn017529	0.081593	0.085551	1562
BMgn007487	0.081636	0.11788	1563
BMgn017407	0.08168	0.081721	1564
BMgn004164	0.081725	0.098527	1565
BMgn000027	0.081731	0.085687	1566
BMgn002554	0.081937	0.085878	1567
BMgn006899	0.081937	0.085878	1568
BMgn009610	0.082056	0.13903	1569
BMgn010779	0.08206	0.13791	1570
BMgn014194	0.082097	0.086036	1571
BMgn009150	0.082172	0.13809	1572
BMgn002658	0.082267	0.098967	1573
BMgn000359	0.082326	0.086247	1574
BMgn013578	0.082402	0.099081	1575
BMgn011101	0.082418	0.086329	1576
BMgn014203	0.082571	0.099216	1577
BMgn001760	0.082571	0.099216	1578
BMgn001873	0.082692	0.086564	1579
BMgn005931	0.082738	0.086602	1580
BMgn017537	0.082808	0.099402	1581
BMgn001121	0.082891	0.1188	1582
BMgn011374	0.08303	0.13944	1583
BMgn015421	0.08307	0.11893	1584
BMgn014477	0.083147	0.099705	1585
BMgn017102	0.08317	0.13963	1586
BMgn016656	0.083173	0.087011	1587
BMgn009447	0.083214	0.099763	1588
BMgn001624	0.08327	0.083263	1589
BMgn003597	0.083379	0.087202	1590
BMgn016690	0.083485	0.1	1591
BMgn009957	0.083607	0.11935	1592
BMgn006671	0.083688	0.10018	1593
BMgn007683	0.083712	0.083703	1594
BMgn000929	0.083712	0.083703	1595
BMgn001582	0.083755	0.10024	1596
BMgn004596	0.083803	0.14059	1597
BMgn008180	0.083823	0.1003	1598
BMgn004386	0.083909	0.14076	1599
BMgn010011	0.084058	0.084037	1600
BMgn006397	0.084111	0.087883	1601
BMgn002670	0.08413	0.084112	1602
BMgn007787	0.084157	0.08793	1603
BMgn008505	0.084178	0.084157	1604
BMgn015657	0.084234	0.11981	1605
BMgn014058	0.084271	0.088044	1606
BMgn011831	0.08434	0.088107	1607
BMgn002889	0.084364	0.10072	1608
BMgn002282	0.084385	0.088151	1609
BMgn009747	0.084458	0.11997	1610
BMgn011345	0.084526	0.14173	1611
BMgn016172	0.084895	0.084853	1612
BMgn000730	0.084905	0.10116	1613
BMgn006676	0.085013	0.14248	1614
BMgn009936	0.085141	0.10138	1615
BMgn015910	0.085208	0.08893	1616
BMgn010843	0.085437	0.089144	1617
BMgn001076	0.085468	0.085438	1618
BMgn010308	0.085486	0.12074	1619
BMgn014352	0.085505	0.089204	1620
BMgn001007	0.085642	0.14348	1621
BMgn000477	0.085648	0.10179	1622
BMgn016438	0.08585	0.10195	1623
BMgn005171	0.086113	0.086075	1624
BMgn016730	0.086188	0.10223	1625
BMgn002232	0.086188	0.10223	1626
BMgn008043	0.086188	0.10223	1627
BMgn007297	0.086305	0.08994	1628
BMgn004192	0.086593	0.10257	1629
BMgn000421	0.08667	0.090288	1630
BMgn005815	0.086795	0.10274	1631
BMgn002908	0.086863	0.10278	1632
BMgn001142	0.08693	0.10284	1633
BMgn002651	0.08699	0.090577	1634
BMgn007097	0.087036	0.090626	1635
BMgn015322	0.087066	0.14561	1636
BMgn002176	0.087264	0.090852	1637
BMgn015428	0.087335	0.10317	1638
BMgn008218	0.087356	0.090938	1639
BMgn008830	0.087362	0.12213	1640
BMgn012809	0.087515	0.091097	1641
BMgn001302	0.087719	0.1224	1642
BMgn012285	0.087766	0.091345	1643
BMgn001366	0.087807	0.10357	1644
BMgn003078	0.087808	0.12246	1645
BMgn006963	0.087812	0.091386	1646
BMgn015994	0.087986	0.12261	1647
BMgn012873	0.087995	0.091553	1648
BMgn010322	0.08804	0.091595	1649
BMgn013493	0.088076	0.12267	1650
BMgn003466	0.088144	0.10386	1651
BMgn002040	0.088177	0.091721	1652
BMgn002586	0.088212	0.10392	1653
BMgn006071	0.088254	0.1228	1654
BMgn004425	0.088268	0.091825	1655
BMgn014439	0.088314	0.091872	1656
BMgn015398	0.088384	0.088328	1657
BMgn008208	0.088402	0.14764	1658
BMgn001839	0.088405	0.091963	1659
BMgn015085	0.088431	0.088381	1660
BMgn015293	0.088432	0.12295	1661
BMgn016331	0.088451	0.092003	1662
BMgn006349	0.088497	0.092051	1663
BMgn000720	0.088655	0.12312	1664
BMgn008404	0.088862	0.09239	1665
BMgn000562	0.088957	0.088926	1666
BMgn016803	0.08902	0.10457	1667
BMgn007080	0.089044	0.092559	1668
BMgn016766	0.089155	0.10469	1669
BMgn017340	0.08919	0.12353	1670
BMgn011326	0.08919	0.12353	1671
BMgn011164	0.089254	0.14893	1672
BMgn016899	0.089455	0.092972	1673
BMgn003534	0.089483	0.089469	1674
BMgn000563	0.089483	0.089469	1675
BMgn007450	0.089492	0.10497	1676
BMgn000277	0.089591	0.12382	1677
BMgn004128	0.089627	0.10508	1678
BMgn012074	0.089637	0.093139	1679
BMgn010894	0.089683	0.093186	1680
BMgn014431	0.089725	0.1239	1681
BMgn008982	0.089829	0.10526	1682
BMgn012463	0.089858	0.12401	1683
BMgn001144	0.089896	0.10531	1684
BMgn008119	0.090116	0.093595	1685
BMgn013168	0.090184	0.093664	1686
BMgn016773	0.090275	0.093753	1687
BMgn007455	0.090287	0.15022	1688
BMgn017129	0.090367	0.093847	1689
BMgn004310	0.090463	0.090471	1690
BMgn003256	0.090503	0.09397	1691
BMgn003308	0.090535	0.10586	1692
BMgn015824	0.090571	0.12455	1693
BMgn014005	0.090636	0.10594	1694
BMgn003651	0.090749	0.090739	1695
BMgn016945	0.090891	0.094343	1696
BMgn004256	0.091006	0.10627	1697
BMgn005745	0.091006	0.10627	1698
BMgn016608	0.091006	0.10627	1699
BMgn015431	0.091141	0.094582	1700
BMgn007393	0.091238	0.12506	1701
BMgn001856	0.091278	0.094705	1702
BMgn002552	0.091324	0.094745	1703
BMgn013547	0.091444	0.10663	1704
BMgn002543	0.091511	0.10668	1705
BMgn017419	0.09162	0.095027	1706
BMgn016504	0.09162	0.095027	1707
BMgn011206	0.091638	0.12534	1708
BMgn015276	0.091726	0.15117	1709
BMgn000883	0.09178	0.1069	1710
BMgn016764	0.091905	0.12555	1711
BMgn013809	0.091916	0.095296	1712
BMgn007886	0.091958	0.15322	1713
BMgn017552	0.092318	0.10735	1714
BMgn014053	0.092371	0.095719	1715
BMgn004750	0.092508	0.095859	1716
BMgn013597	0.092519	0.10752	1717
BMgn006093	0.092586	0.10759	1718
BMgn001804	0.092721	0.1077	1719
BMgn013771	0.092788	0.10776	1720
BMgn006576	0.092794	0.12624	1721
BMgn005275	0.092826	0.096155	1722
BMgn009050	0.092917	0.096234	1723
BMgn006862	0.093115	0.093093	1724
BMgn009598	0.093124	0.10803	1725
BMgn000286	0.093139	0.093111	1726
BMgn001156	0.093211	0.093179	1727
BMgn004721	0.093282	0.096589	1728
BMgn001286	0.093325	0.10821	1729
BMgn006724	0.093354	0.093327	1730
BMgn015040	0.093464	0.09676	1731
BMgn010410	0.093474	0.093436	1732
BMgn005540	0.093594	0.10845	1733
BMgn005080	0.093661	0.10851	1734
BMgn004313	0.093689	0.093664	1735
BMgn017148	0.093691	0.096985	1736
BMgn002451	0.093737	0.097032	1737
BMgn005112	0.093795	0.10862	1738
BMgn002858	0.09394	0.093911	1739
BMgn015968	0.093997	0.10878	1740
BMgn016564	0.09401	0.097281	1741
BMgn011271	0.094064	0.10883	1742
BMgn012336	0.094082	0.12723	1743
BMgn006365	0.094082	0.12723	1744
BMgn006462	0.094146	0.09741	1745
BMgn005038	0.094167	0.094155	1746
BMgn001617	0.094265	0.10899	1747
BMgn017315	0.094286	0.094285	1748
BMgn002506	0.09431	0.094308	1749
BMgn008053	0.094328	0.09758	1750
BMgn012788	0.094419	0.097668	1751
BMgn010520	0.094464	0.097714	1752
BMgn003418	0.094467	0.10914	1753
BMgn006804	0.094645	0.094639	1754
BMgn006927	0.094646	0.097891	1755
BMgn008738	0.094668	0.10931	1756
BMgn009533	0.09468	0.094672	1757
BMgn004730	0.094735	0.10938	1758
BMgn001123	0.094737	0.097973	1759
BMgn017094	0.094747	0.12772	1760
BMgn002043	0.094836	0.094824	1761
BMgn001742	0.094869	0.10951	1762
BMgn002032	0.094874	0.098098	1763
BMgn007152	0.094878	0.15749	1764
BMgn014252	0.09501	0.098232	1765
BMgn004499	0.095099	0.09509	1766
BMgn012736	0.095147	0.098353	1767
BMgn006938	0.095204	0.10976	1768
BMgn001641	0.095237	0.098441	1769
BMgn009176	0.095272	0.10981	1770
BMgn013445	0.09528	0.12814	1771
BMgn004322	0.095302	0.095274	1772
BMgn011411	0.095346	0.15819	1773
BMgn013257	0.095473	0.10999	1774
BMgn016982	0.095546	0.12835	1775
BMgn014678	0.095601	0.095578	1776
BMgn014404	0.095674	0.11018	1777
BMgn005883	0.095887	0.095855	1778
BMgn000711	0.095965	0.099117	1779
BMgn005706	0.095989	0.12866	1780
BMgn015717	0.096143	0.11057	1781
BMgn011876	0.096169	0.099277	1782
BMgn015244	0.096169	0.099277	1783
BMgn006040	0.096411	0.1108	1784
BMgn014970	0.096419	0.099514	1785
BMgn011826	0.096456	0.15979	1786
BMgn011045	0.096464	0.09955	1787
BMgn016303	0.096478	0.11086	1788
BMgn007821	0.096601	0.099662	1789
BMgn002054	0.096746	0.11108	1790
BMgn001244	0.096828	0.099881	1791
BMgn011292	0.096873	0.099923	1792
BMgn007933	0.09688	0.11119	1793
BMgn011122	0.096947	0.11124	1794
BMgn010834	0.09714	0.12954	1795
BMgn011579	0.097215	0.11148	1796
BMgn014720	0.097317	0.12967	1797
BMgn014807	0.097327	0.10035	1798
BMgn016985	0.097349	0.11158	1799
BMgn008077	0.097416	0.11164	1800
BMgn014665	0.097417	0.097366	1801
BMgn011875	0.097418	0.10044	1802
BMgn007842	0.097494	0.1298	1803
BMgn007086	0.097685	0.1553	1804
BMgn008186	0.097691	0.10072	1805
BMgn002179	0.097736	0.10076	1806
BMgn010882	0.097751	0.11195	1807
BMgn003887	0.097781	0.1008	1808
BMgn005267	0.097848	0.13008	1809
BMgn010012	0.097872	0.10089	1810
BMgn000868	0.098008	0.10101	1811
BMgn016722	0.098015	0.15554	1812
BMgn007703	0.098018	0.11217	1813
BMgn005335	0.098134	0.098072	1814
BMgn014310	0.098169	0.098108	1815
BMgn010288	0.09819	0.10119	1816
BMgn003789	0.098462	0.10145	1817
BMgn009410	0.098487	0.11259	1818
BMgn010818	0.098556	0.1306	1819
BMgn015043	0.098621	0.11269	1820
BMgn001968	0.098644	0.10163	1821
BMgn016205	0.098659	0.098625	1822
BMgn009362	0.098754	0.1128	1823
BMgn016724	0.098851	0.098823	1824
BMgn007789	0.099156	0.11315	1825
BMgn003042	0.099161	0.099139	1826
BMgn011338	0.099188	0.10213	1827
BMgn001731	0.099347	0.10229	1828
BMgn016914	0.099356	0.11332	1829
BMgn000861	0.099423	0.11338	1830
BMgn006692	0.09944	0.1313	1831
BMgn010450	0.099506	0.10245	1832
BMgn014245	0.099557	0.11349	1833
BMgn002152	0.099642	0.10257	1834
BMgn004312	0.09969	0.1136	1835
BMgn002309	0.099699	0.099699	1836
BMgn017171	0.09995	0.099955	1837
BMgn000262	0.10002	0.11389	1838
BMgn004254	0.10005	0.10294	1839
BMgn001817	0.10012	0.10011	1840
BMgn001622	0.10015	0.10015	1841
BMgn015399	0.10019	0.11403	1842
BMgn006219	0.10032	0.13197	1843
BMgn000780	0.10037	0.10323	1844
BMgn001217	0.10043	0.11423	1845
BMgn016218	0.10068	0.13221	1846
BMgn011599	0.10073	0.10358	1847
BMgn009904	0.10077	0.10077	1848
BMgn010550	0.10087	0.15756	1849
BMgn015257	0.10105	0.10387	1850
BMgn008289	0.10121	0.1326	1851
BMgn008163	0.10126	0.11494	1852
BMgn010013	0.10132	0.1667	1853
BMgn016152	0.10141	0.10136	1854
BMgn006864	0.10142	0.15794	1855
BMgn014271	0.10145	0.10428	1856
BMgn009016	0.10145	0.10428	1857
BMgn015237	0.10145	0.10428	1858
BMgn007171	0.10145	0.10428	1859
BMgn015259	0.10149	0.11515	1860
BMgn015055	0.10163	0.11526	1861
BMgn017493	0.10169	0.11531	1862
BMgn012179	0.10169	0.10165	1863
BMgn012122	0.10176	0.11537	1864
BMgn004004	0.10209	0.10203	1865
BMgn012797	0.10213	0.10491	1866
BMgn010565	0.10222	0.10498	1867
BMgn002119	0.10232	0.10506	1868
BMgn014249	0.10243	0.11595	1869
BMgn009937	0.10243	0.10519	1870
BMgn016361	0.10244	0.13351	1871
BMgn004014	0.10253	0.13359	1872
BMgn000879	0.10256	0.11607	1873
BMgn007463	0.10259	0.10535	1874
BMgn007897	0.10282	0.10275	1875
BMgn002053	0.1029	0.10564	1876
BMgn007681	0.10296	0.11641	1877
BMgn013137	0.10297	0.13393	1878
BMgn014208	0.10303	0.11646	1879
BMgn004735	0.1031	0.11653	1880
BMgn001872	0.10315	0.10306	1881
BMgn010611	0.10316	0.11657	1882
BMgn006274	0.10319	0.1341	1883
BMgn001101	0.1032	0.10311	1884
BMgn000206	0.10327	0.10598	1885
BMgn014611	0.10336	0.11675	1886
BMgn003147	0.1034	0.10612	1887
BMgn002750	0.1035	0.11688	1888
BMgn005429	0.1035	0.15937	1889
BMgn015367	0.10354	0.10623	1890
BMgn000325	0.10361	0.1035	1891
BMgn002533	0.10376	0.11711	1892
BMgn004801	0.1039	0.10656	1893
BMgn014528	0.10394	0.10661	1894
BMgn000696	0.10404	0.10669	1895
BMgn006833	0.10407	0.10396	1896
BMgn010385	0.10408	0.10675	1897
BMgn015120	0.1042	0.10409	1898
BMgn012451	0.10423	0.11751	1899
BMgn017086	0.10426	0.10691	1900
BMgn014286	0.10429	0.13494	1901
BMgn001025	0.10429	0.11757	1902
BMgn011414	0.10444	0.1071	1903
BMgn009889	0.10447	0.17126	1904
BMgn008560	0.10464	0.13522	1905
BMgn006788	0.10467	0.1073	1906
BMgn016647	0.10468	0.10457	1907
BMgn003481	0.10471	0.10734	1908
BMgn006793	0.10473	0.10461	1909
BMgn013200	0.10473	0.13529	1910
BMgn003092	0.10478	0.1074	1911
BMgn006438	0.10483	0.11803	1912
BMgn009539	0.10489	0.10753	1913
BMgn015846	0.1049	0.10478	1914
BMgn004793	0.10493	0.16039	1915
BMgn011111	0.10494	0.10757	1916
BMgn015151	0.10499	0.1076	1917
BMgn016165	0.10503	0.10763	1918
BMgn001755	0.10503	0.16045	1919
BMgn015578	0.10514	0.10773	1920
BMgn006908	0.10528	0.10516	1921
BMgn006839	0.10535	0.13578	1922
BMgn014608	0.10535	0.10792	1923
BMgn003244	0.10545	0.10534	1924
BMgn014819	0.10549	0.11861	1925
BMgn001997	0.10553	0.10808	1926
BMgn000708	0.10556	0.11866	1927
BMgn015075	0.10564	0.10554	1928
BMgn011358	0.10569	0.11878	1929
BMgn010912	0.1057	0.13603	1930
BMgn007749	0.10571	0.10827	1931
BMgn001901	0.10579	0.13611	1932
BMgn017118	0.10597	0.10585	1933
BMgn006112	0.10602	0.1059	1934
BMgn004000	0.10602	0.10857	1935
BMgn006212	0.10605	0.13631	1936
BMgn010071	0.10625	0.10876	1937
BMgn008118	0.10628	0.10614	1938
BMgn008665	0.10635	0.16134	1939
BMgn011903	0.10662	0.11957	1940
BMgn002362	0.10666	0.13681	1941
BMgn012880	0.10669	0.11962	1942
BMgn015730	0.10671	0.10658	1943
BMgn012487	0.10698	0.10686	1944
BMgn000041	0.10702	0.1371	1945
BMgn011074	0.10702	0.11992	1946
BMgn005088	0.10716	0.12005	1947
BMgn002446	0.10717	0.10704	1948
BMgn015861	0.10722	0.10972	1949
BMgn014440	0.10722	0.10972	1950
BMgn000014	0.10722	0.10972	1951
BMgn005024	0.10722	0.10972	1952
BMgn010264	0.10722	0.10972	1953
BMgn003461	0.10728	0.13731	1954
BMgn016768	0.10747	0.10997	1955
BMgn005283	0.10762	0.10751	1956
BMgn011467	0.10763	0.11013	1957
BMgn009607	0.10766	0.16227	1958
BMgn016489	0.10776	0.13769	1959
BMgn003179	0.10779	0.11028	1960
BMgn011012	0.10809	0.12085	1961
BMgn004563	0.10818	0.10807	1962
BMgn008031	0.10822	0.12097	1963
BMgn002678	0.10824	0.11069	1964
BMgn014560	0.10827	0.10817	1965
BMgn009297	0.10879	0.10872	1966
BMgn004213	0.10879	0.10872	1967
BMgn001018	0.10879	0.10872	1968
BMgn009797	0.10896	0.16319	1969
BMgn004329	0.10903	0.13867	1970
BMgn010178	0.10911	0.10905	1971
BMgn010119	0.10914	0.11154	1972
BMgn015683	0.10938	0.12197	1973
BMgn016245	0.10938	0.12197	1974
BMgn000820	0.10938	0.12197	1975
BMgn001370	0.10938	0.12197	1976
BMgn011242	0.10938	0.12197	1977
BMgn000919	0.10946	0.11184	1978
BMgn000809	0.10965	0.13917	1979
BMgn007489	0.10965	0.10959	1980
BMgn006675	0.10982	0.11219	1981
BMgn005744	0.10986	0.11223	1982
BMgn010528	0.10995	0.12244	1983
BMgn009415	0.11006	0.11	1984
BMgn002796	0.11009	0.11244	1985
BMgn005957	0.11018	0.11252	1986
BMgn014624	0.11031	0.11264	1987
BMgn001534	0.11035	0.11027	1988
BMgn008406	0.11036	0.11269	1989
BMgn015696	0.1104	0.11273	1990
BMgn011279	0.11041	0.12284	1991
BMgn006194	0.11044	0.13977	1992
BMgn011836	0.11048	0.12288	1993
BMgn003093	0.11054	0.12295	1994
BMgn010100	0.11061	0.13989	1995
BMgn013196	0.11087	0.1645	1996
BMgn011487	0.11087	0.11079	1997
BMgn014813	0.1109	0.1132	1998
BMgn008449	0.11094	0.1233	1999
[truncated: 13,796 more rows]

## Sheet: positive screening in 4 ℃
Gene ID	pos|score	pos|p-value	pos|rank
BMgn005570	3.7e-06	4.7e-06	1
BMgn007909	7.27e-06	2.91e-05	2
BMgn001835	3.13e-05	0.00011064	3
BMgn003924	3.31e-05	0.00010813	4
BMgn012564	3.73e-05	6.3e-05	5
BMgn010668	4.51e-05	7.74e-05	6
BMgn005473	4.91e-05	0.00016204	7
BMgn016971	5.97e-05	0.00026547	8
BMgn001043	7.47e-05	0.0002755	9
BMgn008310	8.07e-05	0.00034069	10
BMgn004973	8.29e-05	0.00030747	11
BMgn009430	0.00010753	0.00034445	12
BMgn013678	0.00010793	0.00034508	13
BMgn004612	0.00011005	0.00044913	14
BMgn003186	0.00016701	0.0005137	15
BMgn003806	0.00017836	0.00055131	16
BMgn012554	0.00017922	0.00055319	17
BMgn014403	0.0001883	0.00057638	18
BMgn005270	0.00020981	0.00076945	19
BMgn007973	0.00021221	0.00064847	20
BMgn011169	0.00023873	0.00086912	21
BMgn003615	0.00024673	0.00089357	22
BMgn009493	0.00024955	0.00090046	23
BMgn000849	0.0002509	0.00075441	24
BMgn003726	0.00027307	0.00053188	25
BMgn000457	0.00027646	0.00083025	26
BMgn007847	0.00028344	0.00054629	27
BMgn014798	0.00028489	0.0010716	28
BMgn004754	0.00032708	0.0011518	29
BMgn013180	0.00035841	0.0010753	30
BMgn008369	0.00035841	0.0010753	31
BMgn009170	0.00038611	0.001311	32
BMgn007879	0.00039341	0.00075691	33
BMgn013304	0.000404	0.001197	34
BMgn013027	0.00043854	0.0013085	35
BMgn014984	0.00043854	0.0013085	36
BMgn007845	0.00044363	0.001323	37
BMgn010640	0.00045414	0.0013574	38
BMgn016733	0.00045678	0.0013612	39
BMgn001478	0.00046546	0.0013925	40
BMgn016033	0.00046592	0.001395	41
BMgn013166	0.00047551	0.00090046	42
BMgn001766	0.00047794	0.00048612	43
BMgn008276	0.00048961	0.0015825	44
BMgn003520	0.00049127	0.00093932	45
BMgn004711	0.0005046	0.00096064	46
BMgn003195	0.0005165	0.0015135	47
BMgn008851	0.00052567	0.00099386	48
BMgn014177	0.00052846	0.0016978	49
BMgn008304	0.00053759	0.0015768	50
BMgn009885	0.00054937	0.0017555	51
BMgn012371	0.00056424	0.0010666	52
BMgn007510	0.00061583	0.0022989	53
BMgn012793	0.00061696	0.0018094	54
BMgn013621	0.00063849	0.0023936	55
BMgn005288	0.0006541	0.00203	56
BMgn004782	0.00065958	0.0025603	57
BMgn002644	0.00068091	0.0019874	58
BMgn015807	0.00068848	0.0021228	59
BMgn001547	0.0006929	0.0012966	60
BMgn015294	0.00075565	0.0028255	61
BMgn007064	0.00077666	0.00078261	62
BMgn006986	0.0007884	0.0022946	63
BMgn003451	0.00079382	0.0014928	64
BMgn003627	0.00080124	0.0015016	65
BMgn003995	0.00081226	0.0024481	66
BMgn002530	0.00090624	0.0026218	67
BMgn005386	0.00091312	0.001706	68
BMgn012762	0.00092449	0.0026763	69
BMgn000898	0.00096752	0.0028004	70
BMgn014290	0.0010014	0.0029446	71
BMgn011620	0.0010137	0.0029321	72
BMgn004706	0.0010165	0.0029427	73
BMgn003879	0.0010239	0.0030154	74
BMgn002215	0.001159	0.0011274	75
BMgn012032	0.001178	0.0043318	76
BMgn006495	0.0011824	0.0034229	77
BMgn013067	0.0011869	0.0034385	78
BMgn007603	0.0011943	0.0034743	79
BMgn001106	0.0012059	0.00351	80
BMgn002889	0.0012239	0.0035351	81
BMgn006489	0.0012304	0.0035727	82
BMgn005535	0.0012469	0.0035915	83
BMgn012546	0.0012718	0.003688	84
BMgn013433	0.0012899	0.00371	85
BMgn004422	0.0012904	0.0012647	86
BMgn009403	0.0012951	0.003747	87
BMgn009845	0.0013729	0.0039513	88
BMgn003362	0.0013856	0.0026406	89
BMgn016019	0.0014265	0.0051849	90
BMgn009463	0.0014808	0.0042284	91
BMgn006044	0.0015052	0.0028769	92
BMgn001252	0.0015533	0.0015217	93
BMgn008842	0.0016051	0.0045844	94
BMgn011801	0.0016122	0.0046039	95
BMgn007780	0.0016243	0.0031113	96
BMgn012556	0.0016404	0.0057021	97
BMgn015906	0.0016721	0.0032098	98
BMgn014094	0.0016721	0.0032098	99
BMgn012250	0.0016847	0.0016564	100
BMgn000473	0.0017439	0.003352	101
BMgn003777	0.0017477	0.0049806	102
BMgn006245	0.0017564	0.0017172	103
BMgn015693	0.0018328	0.0035395	104
BMgn006634	0.0018559	0.005289	105
BMgn017493	0.0018572	0.0052934	106
BMgn010657	0.0018572	0.0052934	107
BMgn001861	0.0018581	0.0052953	108
BMgn017327	0.001904	0.0054194	109
BMgn008015	0.0019641	0.0055974	110
BMgn006919	0.0019702	0.0056093	111
BMgn011948	0.0020195	0.0039225	112
BMgn015449	0.0020401	0.0057422	113
BMgn002829	0.0020541	0.0039939	114
BMgn013854	0.0020541	0.0039939	115
BMgn014088	0.0020811	0.0068429	116
BMgn007372	0.0021257	0.0041331	117
BMgn008989	0.0021257	0.0060136	118
BMgn006851	0.0022197	0.0043199	119
BMgn010751	0.0022197	0.0043199	120
BMgn003309	0.0022197	0.0043199	121
BMgn000851	0.0022287	0.0043381	122
BMgn001728	0.0022566	0.0063778	123
BMgn015800	0.0022627	0.006391	124
BMgn013096	0.0022656	0.0073074	125
BMgn013511	0.0022689	0.0044064	126
BMgn001358	0.0023256	0.0045123	127
BMgn011737	0.0023256	0.0045123	128
BMgn007023	0.0023367	0.0066029	129
BMgn001249	0.0023437	0.006621	130
BMgn012651	0.0023859	0.0046252	131
BMgn007044	0.0023874	0.0076089	132
BMgn014744	0.0024495	0.002435	133
BMgn003892	0.0024599	0.0047587	134
BMgn008131	0.002468	0.0068724	135
BMgn001084	0.0025045	0.0069508	136
BMgn016130	0.0025308	0.007965	137
BMgn013084	0.0025663	0.0080621	138
BMgn011978	0.0025843	0.007105	139
BMgn002627	0.0026145	0.0071582	140
BMgn008720	0.0026465	0.0072147	141
BMgn001238	0.0026747	0.0051567	142
BMgn013413	0.002686	0.0072798	143
BMgn004799	0.0026965	0.0074742	144
BMgn013934	0.0026965	0.0074742	145
BMgn015556	0.0027352	0.0052614	146
BMgn010154	0.0027576	0.0074102	147
BMgn013000	0.0028048	0.0086407	148
BMgn006103	0.0028179	0.0054175	149
BMgn000056	0.0028291	0.0075494	150
BMgn004477	0.00284	0.0078854	151
BMgn016049	0.0028678	0.007629	152
BMgn006415	0.002895	0.010187	153
BMgn015737	0.0029123	0.0080684	154
BMgn010216	0.0029365	0.0077531	155
BMgn004638	0.0029377	0.0077556	156
BMgn016974	0.0029611	0.0056682	157
BMgn007522	0.0029904	0.0082546	158
BMgn001825	0.0029904	0.0082546	159
BMgn014996	0.0029991	0.0029866	160
BMgn002220	0.0030027	0.0082897	161
BMgn001509	0.0031042	0.0059321	162
BMgn004980	0.0031186	0.0030913	163
BMgn006779	0.0031658	0.0081737	164
BMgn005994	0.0031658	0.0081737	165
BMgn009070	0.0031984	0.0087937	166
BMgn004531	0.0032235	0.0061666	167
BMgn008737	0.0033299	0.0084614	168
BMgn004747	0.0033932	0.010109	169
BMgn000259	0.0033976	0.0085831	170
BMgn004064	0.0034382	0.0065596	171
BMgn005920	0.0034996	0.0066756	172
BMgn004102	0.0035248	0.0034956	173
BMgn014414	0.0035445	0.0088557	174
BMgn012772	0.0036397	0.0090281	175
BMgn017227	0.0036525	0.0099577	176
BMgn010755	0.0038323	0.0073193	177
BMgn001950	0.0038713	0.0038197	178
BMgn007549	0.0039035	0.01138	179
BMgn005774	0.0039134	0.010609	180
BMgn000066	0.003943	0.0038861	181
BMgn008251	0.0039868	0.0076064	182
BMgn002931	0.0040584	0.0077506	183
BMgn014993	0.0041527	0.01123	184
BMgn010673	0.00416	0.0079412	185
BMgn001035	0.0041614	0.0099684	186
BMgn005634	0.0041863	0.007985	187
BMgn000006	0.0041946	0.011346	188
BMgn012869	0.0042238	0.010087	189
BMgn006041	0.0042253	0.0080609	190
BMgn003446	0.0043188	0.011655	191
BMgn000399	0.0043311	0.010281	192
BMgn007773	0.0043422	0.011715	193
BMgn008624	0.0043446	0.0082935	194
BMgn011770	0.0043446	0.0082935	195
BMgn003668	0.0043818	0.0083605	196
BMgn004476	0.0044632	0.010536	197
BMgn012248	0.0045525	0.01069	198
BMgn006966	0.004585	0.012342	199
BMgn011044	0.0046289	0.010828	200
BMgn001205	0.004648	0.0045844	201
BMgn009534	0.0046545	0.0088357	202
BMgn013255	0.0047364	0.011015	203
BMgn009814	0.0047976	0.0091228	204
BMgn015389	0.0048276	0.0091773	205
BMgn010791	0.0048276	0.0091773	206
BMgn009002	0.0048276	0.0091773	207
BMgn016492	0.0048479	0.011211	208
BMgn012080	0.0049028	0.011315	209
BMgn004342	0.0049445	0.0094117	210
BMgn001985	0.0049479	0.0094211	211
BMgn013886	0.0049765	0.0094794	212
BMgn005621	0.0049777	0.011451	213
BMgn016330	0.0049826	0.0049217	214
BMgn005928	0.0051313	0.0097753	215
BMgn015186	0.0051529	0.011807	216
BMgn001630	0.0052101	0.0099163	217
BMgn000440	0.0052215	0.0051567	218
BMgn016747	0.0052693	0.0052062	219
BMgn002968	0.0052981	0.010071	220
BMgn002561	0.0053416	0.01216	221
BMgn006134	0.0053572	0.014343	222
BMgn008169	0.005433	0.012324	223
BMgn012163	0.0054568	0.012365	224
BMgn001887	0.005485	0.014685	225
BMgn005508	0.0055432	0.012515	226
BMgn009848	0.0055603	0.010545	227
BMgn009208	0.0055716	0.015644	228
BMgn010684	0.0055731	0.012568	229
BMgn012200	0.0055815	0.012587	230
BMgn000725	0.0056431	0.010706	231
BMgn014169	0.0056503	0.010717	232
BMgn013917	0.0057477	0.010907	233
BMgn006271	0.0057636	0.012924	234
BMgn010542	0.005777	0.015476	235
BMgn010487	0.0057931	0.01619	236
BMgn012223	0.0058131	0.01103	237
BMgn003583	0.0058548	0.0058074	238
BMgn008275	0.0059133	0.015851	239
BMgn005040	0.0060358	0.016138	240
BMgn012008	0.006038	0.013412	241
BMgn012164	0.0060561	0.011469	242
BMgn007460	0.006092	0.016937	243
BMgn010958	0.0060942	0.013509	244
BMgn008467	0.0061083	0.011552	245
BMgn004412	0.0061083	0.011552	246
BMgn011887	0.0063166	0.017459	247
BMgn008542	0.0063313	0.013947	248
BMgn001512	0.0063415	0.016904	249
BMgn014294	0.0063867	0.017622	250
BMgn004994	0.0063942	0.012077	251
BMgn001987	0.0064165	0.012116	252
BMgn009854	0.0064165	0.012116	253
BMgn009497	0.0064656	0.012196	254
BMgn007844	0.0065435	0.012352	255
BMgn008671	0.0066168	0.014464	256
BMgn012129	0.0066779	0.018352	257
BMgn011302	0.0067151	0.0066693	258
BMgn000114	0.0067852	0.01803	259
BMgn016108	0.0068063	0.01808	260
BMgn016805	0.0068229	0.012879	261
BMgn009286	0.0068229	0.012879	262
BMgn009504	0.0068234	0.018124	263
BMgn014800	0.006834	0.018144	264
BMgn004447	0.0068663	0.018226	265
BMgn007373	0.0069023	0.014961	266
BMgn000103	0.0069421	0.0069125	267
BMgn003685	0.0070377	0.0069971	268
BMgn003009	0.00711	0.013385	269
BMgn009855	0.0071877	0.015471	270
BMgn015601	0.0071877	0.015471	271
BMgn001250	0.0071902	0.015474	272
BMgn003704	0.0072396	0.013605	273
BMgn005306	0.0072559	0.013641	274
BMgn000495	0.0073048	0.013726	275
BMgn015598	0.0074201	0.020087	276
BMgn003978	0.0074258	0.013949	277
BMgn002346	0.0074731	0.015949	278
BMgn000249	0.0075334	0.019924	279
BMgn002128	0.0075644	0.014215	280
BMgn002209	0.0076325	0.014343	281
BMgn003178	0.007659	0.0076014	282
BMgn000507	0.007659	0.0076014	283
BMgn016394	0.007659	0.0076014	284
BMgn014951	0.0077476	0.020465	285
BMgn011089	0.0077476	0.020465	286
BMgn012785	0.0077476	0.020465	287
BMgn010931	0.0077677	0.020516	288
BMgn008464	0.0077887	0.020563	289
BMgn016915	0.0078307	0.014719	290
BMgn012734	0.0078628	0.020759	291
BMgn008714	0.0079367	0.016797	292
BMgn006352	0.0079419	0.014909	293
BMgn005798	0.0080053	0.021116	294
BMgn004873	0.0080436	0.017	295
BMgn002164	0.0080653	0.0080289	296
BMgn001360	0.00817	0.017227	297
BMgn015397	0.0081862	0.017257	298
BMgn010672	0.0082148	0.02164	299
BMgn009600	0.0082428	0.021703	300
BMgn004315	0.0082565	0.008212	301
BMgn007954	0.0082641	0.017387	302
BMgn009454	0.0083703	0.015727	303
BMgn014714	0.0083951	0.017625	304
BMgn006813	0.0084025	0.017642	305
BMgn012828	0.0084328	0.022181	306
BMgn007939	0.0084537	0.01772	307
BMgn007203	0.0084714	0.017754	308
BMgn006087	0.0084735	0.015936	309
BMgn012553	0.0084835	0.0084314	310
BMgn012570	0.0084835	0.0084314	311
BMgn008045	0.0086528	0.018078	312
BMgn012328	0.0087272	0.016415	313
BMgn000994	0.0087597	0.016467	314
BMgn003655	0.0087822	0.0087366	315
BMgn003061	0.0088923	0.023092	316
BMgn007785	0.0088938	0.016735	317
BMgn008085	0.0088944	0.016738	318
BMgn006680	0.0089076	0.023117	319
BMgn010207	0.008918	0.018544	320
BMgn010325	0.0089889	0.016908	321
BMgn004545	0.0090026	0.023265	322
BMgn011473	0.0090529	0.017021	323
BMgn008254	0.0090975	0.023432	324
BMgn010849	0.0091073	0.024215	325
BMgn001858	0.0092124	0.0091604	326
BMgn004450	0.0092214	0.019076	327
BMgn005451	0.0092852	0.02464	328
BMgn005976	0.0092909	0.017464	329
BMgn001137	0.0093695	0.017601	330
BMgn003725	0.0094792	0.019537	331
BMgn009835	0.0095122	0.017864	332
BMgn012365	0.0095122	0.017864	333
BMgn008277	0.0095759	0.019699	334
BMgn012940	0.0096306	0.0095753	335
BMgn009262	0.0097025	0.018248	336
BMgn007199	0.0097195	0.018283	337
BMgn015141	0.0097738	0.01839	338
BMgn008825	0.0098351	0.024652	339
BMgn005646	0.0098452	0.018523	340
BMgn015475	0.0098519	0.018536	341
BMgn012139	0.009879	0.024712	342
BMgn002332	0.0098927	0.018619	343
BMgn001377	0.0098964	0.020262	344
BMgn004434	0.0098996	0.026128	345
BMgn010964	0.0099518	0.018716	346
BMgn002376	0.0099892	0.020435	347
BMgn014140	0.010037	0.020512	348
BMgn009826	0.010047	0.024974	349
BMgn003992	0.010202	0.019192	350
BMgn004892	0.010217	0.02082	351
BMgn004165	0.010249	0.02087	352
BMgn009888	0.010249	0.02087	353
BMgn000766	0.010298	0.019363	354
BMgn014220	0.0104	0.019553	355
BMgn008406	0.010463	0.019669	356
BMgn008650	0.010503	0.019742	357
BMgn004131	0.010535	0.019811	358
BMgn005108	0.010537	0.021374	359
BMgn011870	0.010537	0.021374	360
BMgn007543	0.010615	0.02785	361
BMgn016735	0.010705	0.020151	362
BMgn012672	0.010744	0.020228	363
BMgn015323	0.010749	0.020234	364
BMgn011116	0.010799	0.020344	365
BMgn000308	0.010807	0.021857	366
BMgn003196	0.010838	0.020417	367
BMgn009992	0.010857	0.026256	368
BMgn015278	0.010858	0.02195	369
BMgn011061	0.010858	0.02195	370
BMgn006414	0.010858	0.02195	371
BMgn009294	0.01092	0.026363	372
BMgn011178	0.010983	0.02065	373
BMgn011798	0.010993	0.010927	374
BMgn005611	0.011081	0.020848	375
BMgn000970	0.011154	0.020983	376
BMgn007942	0.011178	0.022495	377
BMgn009708	0.011178	0.022495	378
BMgn010467	0.011187	0.0268	379
BMgn007136	0.011187	0.0268	380
BMgn013548	0.011203	0.029287	381
BMgn000264	0.011224	0.021116	382
BMgn008363	0.01132	0.022728	383
BMgn007193	0.011358	0.029639	384
BMgn014483	0.011374	0.0271	385
BMgn003004	0.011391	0.027132	386
BMgn010954	0.011392	0.022849	387
BMgn015271	0.011392	0.022849	388
BMgn009936	0.011392	0.022849	389
BMgn004647	0.011431	0.02152	390
BMgn011697	0.011516	0.027336	391
BMgn005099	0.011516	0.027336	392
BMgn006886	0.011566	0.01149	393
BMgn000905	0.011566	0.01149	394
BMgn015810	0.011569	0.023162	395
BMgn014850	0.011571	0.030156	396
BMgn007910	0.011585	0.021811	397
BMgn012997	0.011658	0.02755	398
BMgn012481	0.011675	0.021996	399
BMgn001694	0.011675	0.021996	400
BMgn001768	0.011753	0.027697	401
BMgn000670	0.011763	0.022164	402
BMgn009213	0.011793	0.011718	403
BMgn002406	0.01181	0.023557	404
BMgn004765	0.01182	0.022275	405
BMgn004592	0.011827	0.023588	406
BMgn010130	0.011848	0.02785	407
BMgn005629	0.011851	0.022332	408
BMgn005527	0.011859	0.022347	409
BMgn011255	0.011865	0.022357	410
BMgn003084	0.011877	0.011803	411
BMgn013544	0.011984	0.011907	412
BMgn014135	0.012103	0.024068	413
BMgn010592	0.01214	0.012046	414
BMgn010869	0.012167	0.028373	415
BMgn011505	0.012167	0.028373	416
BMgn013230	0.012174	0.022934	417
BMgn005930	0.012174	0.022934	418
BMgn011985	0.012187	0.02296	419
BMgn004143	0.012244	0.024312	420
BMgn013021	0.012245	0.024313	421
BMgn007427	0.012271	0.023113	422
BMgn016349	0.012306	0.031922	423
BMgn004376	0.012327	0.023205	424
BMgn000627	0.012345	0.024473	425
BMgn006754	0.012388	0.023313	426
BMgn013077	0.012416	0.028787	427
BMgn016133	0.012438	0.012351	428
BMgn002905	0.012438	0.012351	429
BMgn005388	0.012513	0.023551	430
BMgn011370	0.012529	0.024796	431
BMgn000383	0.012529	0.024796	432
BMgn000272	0.012553	0.023627	433
BMgn008689	0.012565	0.02485	434
BMgn002972	0.012565	0.02485	435
BMgn013453	0.012673	0.023848	436
BMgn003126	0.012742	0.025152	437
BMgn014946	0.012749	0.012652	438
BMgn007974	0.012885	0.025409	439
BMgn002755	0.012914	0.033372	440
BMgn008281	0.012916	0.012807	441
BMgn009206	0.012945	0.025525	442
BMgn005425	0.012984	0.029689	443
BMgn016292	0.01299	0.025592	444
BMgn009980	0.013029	0.024483	445
BMgn007635	0.013029	0.024483	446
BMgn016676	0.013071	0.025711	447
BMgn003973	0.013179	0.013067	448
BMgn003081	0.01324	0.026004	449
BMgn014435	0.013259	0.024899	450
BMgn007221	0.013345	0.025043	451
BMgn004815	0.013385	0.025111	452
BMgn001536	0.013385	0.025111	453
BMgn003332	0.01343	0.025189	454
BMgn009473	0.013432	0.030408	455
BMgn011067	0.013511	0.025334	456
BMgn004193	0.013595	0.026595	457
BMgn013984	0.013623	0.030704	458
BMgn009805	0.013812	0.026951	459
BMgn011619	0.013812	0.025881	460
BMgn015419	0.013868	0.035707	461
BMgn015100	0.013945	0.026106	462
BMgn002594	0.013957	0.031282	463
BMgn007319	0.013983	0.031334	464
BMgn000892	0.014168	0.026523	465
BMgn016117	0.014177	0.03166	466
BMgn007090	0.014223	0.03655	467
BMgn001219	0.014234	0.02771	468
BMgn007475	0.014317	0.027852	469
BMgn015162	0.014411	0.027989	470
BMgn013365	0.014447	0.02806	471
BMgn010184	0.01445	0.03214	472
BMgn009801	0.01445	0.03214	473
BMgn012003	0.014626	0.037479	474
BMgn005721	0.014643	0.027364	475
BMgn003884	0.014798	0.027662	476
BMgn017542	0.014876	0.032852	477
BMgn006035	0.014893	0.038099	478
BMgn011707	0.014902	0.028849	479
BMgn001740	0.014941	0.028923	480
BMgn005565	0.014979	0.027997	481
BMgn001201	0.014985	0.028009	482
BMgn011618	0.014999	0.029014	483
BMgn001885	0.015013	0.029039	484
BMgn017299	0.015015	0.029043	485
BMgn016080	0.015022	0.028073	486
BMgn004231	0.015067	0.014962	487
BMgn001775	0.015115	0.015024	488
BMgn007878	0.015207	0.033376	489
BMgn009883	0.015259	0.028506	490
BMgn005161	0.015259	0.028506	491
BMgn017548	0.015264	0.029473	492
BMgn015876	0.015282	0.015194	493
BMgn008494	0.015289	0.033504	494
BMgn013265	0.015318	0.02956	495
BMgn012814	0.01532	0.028614	496
BMgn011435	0.015426	0.01533	497
BMgn001154	0.015498	0.028943	498
BMgn010214	0.015512	0.029896	499
BMgn010334	0.015639	0.029214	500
BMgn001557	0.015696	0.039983	501
BMgn004446	0.015712	0.015616	502
BMgn008091	0.015736	0.015638	503
BMgn008548	0.015784	0.030368	504
BMgn001491	0.015796	0.03039	505
BMgn015193	0.015903	0.030579	506
BMgn008161	0.015915	0.034522	507
BMgn007518	0.015923	0.030616	508
BMgn005842	0.015987	0.030723	509
BMgn013836	0.016002	0.029862	510
BMgn003397	0.016066	0.029963	511
BMgn008230	0.016071	0.015969	512
BMgn000491	0.016107	0.034858	513
BMgn012938	0.016171	0.031048	514
BMgn016661	0.016196	0.030201	515
BMgn001773	0.016196	0.030201	516
BMgn000786	0.016196	0.030201	517
BMgn002379	0.016196	0.030201	518
BMgn016741	0.016221	0.031153	519
BMgn010590	0.016226	0.031157	520
BMgn002381	0.016255	0.030294	521
BMgn000110	0.016262	0.016163	522
BMgn006971	0.016321	0.031326	523
BMgn005416	0.016387	0.035331	524
BMgn011512	0.016477	0.030689	525
BMgn012526	0.016513	0.031669	526
BMgn015063	0.016525	0.016449	527
BMgn006140	0.01654	0.03079	528
BMgn017055	0.016576	0.031774	529
BMgn004273	0.016576	0.031774	530
BMgn005449	0.016583	0.031791	531
BMgn004264	0.016593	0.031803	532
BMgn016454	0.016634	0.030955	533
BMgn003985	0.016671	0.035767	534
BMgn007467	0.016675	0.042307	535
BMgn013034	0.016677	0.03578	536
BMgn001416	0.016677	0.03578	537
BMgn006038	0.016677	0.03578	538
BMgn012935	0.016812	0.016753	539
BMgn012795	0.016816	0.032173	540
BMgn001386	0.016816	0.032173	541
BMgn015757	0.016859	0.016798	542
BMgn010930	0.016895	0.031427	543
BMgn015847	0.016895	0.031427	544
BMgn017500	0.016895	0.031427	545
BMgn006799	0.016966	0.032426	546
BMgn001522	0.017034	0.031676	547
BMgn008810	0.017143	0.032729	548
BMgn000542	0.017205	0.032836	549
BMgn008546	0.01724	0.032071	550
BMgn000462	0.01725	0.032087	551
BMgn006328	0.017259	0.032106	552
BMgn017331	0.017266	0.03212	553
BMgn011476	0.017272	0.032132	554
BMgn001228	0.01729	0.017245	555
BMgn006461	0.017298	0.03218	556
BMgn003207	0.017306	0.032196	557
BMgn015864	0.017322	0.032225	558
BMgn002922	0.017329	0.033041	559
BMgn013725	0.017333	0.043872	560
BMgn014225	0.017378	0.036919	561
BMgn007222	0.017536	0.033409	562
BMgn014423	0.017608	0.03354	563
BMgn009661	0.01764	0.033596	564
BMgn000765	0.017796	0.033877	565
BMgn011679	0.017821	0.045535	566
BMgn005022	0.017863	0.017807	567
BMgn005724	0.017863	0.017807	568
BMgn002804	0.017863	0.017807	569
BMgn016559	0.017914	0.033205	570
BMgn012373	0.01799	0.037894	571
BMgn005085	0.018086	0.038038	572
BMgn000083	0.018174	0.033415	573
BMgn012457	0.018222	0.034584	574
BMgn002879	0.018222	0.034584	575
BMgn007060	0.018238	0.038287	576
BMgn001788	0.018238	0.038287	577
BMgn006834	0.018274	0.038341	578
BMgn012102	0.018483	0.046569	579
BMgn014092	0.018524	0.035107	580
BMgn013222	0.018572	0.035189	581
BMgn008813	0.018575	0.038828	582
BMgn007089	0.018604	0.038866	583
BMgn016923	0.018695	0.035407	584
BMgn014185	0.018727	0.035482	585
BMgn000681	0.018772	0.035565	586
BMgn017553	0.018813	0.03396	587
BMgn007840	0.018856	0.039272	588
BMgn013200	0.018934	0.039402	589
BMgn016010	0.018949	0.035873	590
BMgn016930	0.018949	0.035873	591
BMgn008588	0.019033	0.035999	592
BMgn012038	0.019082	0.019056	593
BMgn016713	0.019135	0.036164	594
BMgn011793	0.019168	0.034287	595
BMgn002818	0.019168	0.034287	596
BMgn001628	0.019381	0.034464	597
BMgn013134	0.019429	0.034506	598
BMgn010906	0.01948	0.036748	599
BMgn014306	0.019559	0.036884	600
BMgn010717	0.019655	0.049013	601
BMgn013985	0.019655	0.019657	602
BMgn013728	0.019687	0.040633	603
BMgn007387	0.019687	0.040633	604
BMgn001283	0.019763	0.037244	605
BMgn009863	0.019839	0.03738	606
BMgn007377	0.02001	0.037677	607
BMgn015695	0.020059	0.041245	608
BMgn011934	0.02009	0.041303	609
BMgn004949	0.020131	0.037915	610
BMgn017218	0.020131	0.037915	611
BMgn004036	0.020131	0.037915	612
BMgn014565	0.0203	0.041623	613
BMgn005393	0.0203	0.041623	614
BMgn006321	0.020329	0.038268	615
BMgn015736	0.020336	0.020316	616
BMgn004377	0.020336	0.020316	617
BMgn004130	0.020446	0.035408	618
BMgn003861	0.020446	0.035408	619
BMgn015729	0.020446	0.035408	620
BMgn012796	0.020464	0.038522	621
BMgn017052	0.020677	0.038909	622
BMgn009639	0.020682	0.038919	623
BMgn010227	0.020682	0.038919	624
BMgn009820	0.020682	0.038919	625
BMgn007423	0.020682	0.038919	626
BMgn006141	0.020922	0.020864	627
BMgn003337	0.021036	0.039539	628
BMgn008881	0.021037	0.035934	629
BMgn015045	0.021099	0.042896	630
BMgn003339	0.021226	0.0361	631
BMgn005273	0.021375	0.043316	632
BMgn001777	0.021463	0.036287	633
BMgn000323	0.021463	0.036287	634
BMgn009851	0.021463	0.036287	635
BMgn013340	0.021463	0.036287	636
BMgn004703	0.021463	0.036287	637
BMgn002828	0.021571	0.040467	638
BMgn009919	0.021597	0.054009	639
BMgn004572	0.021615	0.021549	640
BMgn016326	0.021723	0.052061	641
BMgn001719	0.021778	0.040824	642
BMgn010117	0.021794	0.036598	643
BMgn015476	0.021806	0.021765	644
BMgn004621	0.021832	0.044071	645
BMgn014363	0.021832	0.044071	646
BMgn005367	0.021865	0.036651	647
BMgn004474	0.021884	0.041015	648
BMgn016937	0.022219	0.036999	649
BMgn016361	0.022222	0.044703	650
BMgn009161	0.022272	0.041699	651
BMgn009625	0.022308	0.022258	652
BMgn004591	0.022326	0.044872	653
BMgn006621	0.022361	0.037129	654
BMgn011606	0.022556	0.053274	655
BMgn000424	0.022557	0.045241	656
BMgn010562	0.022557	0.045241	657
BMgn006470	0.022557	0.045241	658
BMgn008608	0.022597	0.037353	659
BMgn010151	0.022692	0.037434	660
BMgn013103	0.022729	0.042486	661
BMgn006678	0.022782	0.042576	662
BMgn012023	0.022929	0.042826	663
BMgn016215	0.022999	0.037708	664
BMgn014691	0.023025	0.053971	665
BMgn006297	0.023105	0.043109	666
BMgn010702	0.023135	0.043159	667
BMgn009804	0.023214	0.04631	668
BMgn006539	0.023214	0.04631	669
BMgn014123	0.02326	0.043387	670
BMgn004861	0.023264	0.023204	671
BMgn009922	0.023345	0.046512	672
BMgn009795	0.02343	0.058012	673
BMgn008966	0.023431	0.023371	674
BMgn016674	0.023543	0.043848	675
BMgn006706	0.023613	0.038264	676
BMgn016325	0.023613	0.038264	677
BMgn009356	0.023613	0.038264	678
BMgn000211	0.023754	0.023672	679
BMgn007645	0.023778	0.038403	680
BMgn009425	0.023904	0.055267	681
BMgn006459	0.023919	0.047408	682
BMgn005562	0.024001	0.044643	683
BMgn017141	0.024005	0.0239	684
BMgn008647	0.024028	0.047576	685
BMgn013777	0.024028	0.047576	686
BMgn003469	0.024132	0.038715	687
BMgn006835	0.024132	0.038715	688
BMgn005145	0.024132	0.038715	689
BMgn013557	0.024213	0.045008	690
BMgn011631	0.024324	0.045205	691
BMgn006065	0.024375	0.024262	692
BMgn005771	0.024482	0.048323	693
BMgn015749	0.024495	0.045512	694
BMgn005657	0.024602	0.024472	695
BMgn008967	0.024626	0.024499	696
BMgn001332	0.02465	0.024528	697
BMgn008027	0.024777	0.046007	698
BMgn004824	0.025053	0.039528	699
BMgn000967	0.025092	0.024999	700
BMgn014548	0.025106	0.04935	701
BMgn013184	0.025235	0.04681	702
BMgn006290	0.02531	0.057294	703
BMgn016383	0.025343	0.025241	704
BMgn009361	0.025448	0.047195	705
BMgn002461	0.025477	0.039898	706
BMgn011049	0.025572	0.039995	707
BMgn002953	0.025606	0.025517	708
BMgn001103	0.025693	0.047584	709
BMgn009572	0.02577	0.047712	710
BMgn006329	0.025871	0.050591	711
BMgn009662	0.025888	0.050615	712
BMgn005377	0.025901	0.047934	713
BMgn010864	0.02594	0.025844	714
BMgn010711	0.026032	0.048152	715
BMgn002382	0.026057	0.048187	716
BMgn002567	0.026116	0.048299	717
BMgn009627	0.026185	0.040518	718
BMgn003296	0.026185	0.040518	719
BMgn011448	0.026194	0.048424	720
BMgn004673	0.026369	0.048722	721
BMgn000726	0.026371	0.026298	722
BMgn016922	0.026538	0.026476	723
BMgn014174	0.026574	0.049076	724
BMgn013596	0.026574	0.049076	725
BMgn011481	0.026591	0.051741	726
BMgn008609	0.026621	0.049161	727
BMgn016748	0.026633	0.026575	728
BMgn002015	0.026656	0.040921	729
BMgn013868	0.026751	0.041003	730
BMgn016314	0.026751	0.041003	731
BMgn006327	0.026772	0.059494	732
BMgn005488	0.026867	0.049549	733
BMgn003576	0.026899	0.049612	734
BMgn011553	0.026939	0.041167	735
BMgn016505	0.026961	0.049707	736
BMgn000275	0.027064	0.026988	737
BMgn000953	0.027089	0.049916	738
BMgn012012	0.027137	0.049989	739
BMgn014966	0.027169	0.052677	740
BMgn000102	0.027293	0.050256	741
BMgn010820	0.027413	0.060474	742
BMgn000900	0.027454	0.050516	743
BMgn004175	0.02747	0.02738	744
BMgn009384	0.027473	0.060567	745
BMgn005591	0.027473	0.060567	746
BMgn015820	0.027481	0.053189	747
BMgn013190	0.027502	0.053232	748
BMgn008586	0.027524	0.050639	749
BMgn007786	0.027552	0.041696	750
BMgn016137	0.027646	0.041771	751
BMgn006590	0.027665	0.050871	752
BMgn006970	0.027715	0.05096	753
BMgn012135	0.027721	0.02764	754
BMgn010388	0.027741	0.051	755
BMgn009668	0.027757	0.027672	756
BMgn017138	0.02778	0.051073	757
BMgn002556	0.027788	0.041888	758
BMgn016749	0.02784	0.027749	759
BMgn007144	0.027857	0.051208	760
BMgn012400	0.027876	0.051242	761
BMgn004095	0.027936	0.027853	762
BMgn001395	0.027936	0.027853	763
BMgn017576	0.027976	0.042051	764
BMgn014814	0.028032	0.054108	765
BMgn009898	0.02805	0.051544	766
BMgn008170	0.028067	0.027989	767
BMgn007918	0.028087	0.051593	768
BMgn005498	0.028102	0.051619	769
BMgn015809	0.028141	0.042191	770
BMgn007192	0.028175	0.028089	771
BMgn002415	0.028206	0.051796	772
BMgn008792	0.028245	0.054439	773
BMgn013361	0.028298	0.05197	774
BMgn017296	0.0284	0.042404	775
BMgn016590	0.028416	0.054701	776
BMgn010664	0.028569	0.028473	777
BMgn013922	0.028593	0.028494	778
BMgn004938	0.028612	0.042613	779
BMgn010074	0.028612	0.042613	780
BMgn015831	0.028612	0.042613	781
BMgn011819	0.028614	0.05253	782
BMgn009395	0.028614	0.05253	783
BMgn005495	0.028617	0.028509	784
BMgn011824	0.028712	0.028597	785
BMgn002208	0.028765	0.052794	786
BMgn011064	0.028778	0.052815	787
BMgn000195	0.028791	0.055299	788
BMgn003263	0.028808	0.028683	789
BMgn016852	0.028824	0.042785	790
BMgn017258	0.028927	0.028814	791
BMgn011629	0.028998	0.070314	792
BMgn013552	0.029013	0.042958	793
BMgn008635	0.02906	0.043003	794
BMgn014848	0.029071	0.053286	795
BMgn002649	0.029079	0.053303	796
BMgn004380	0.029079	0.053303	797
BMgn001331	0.029107	0.043053	798
BMgn009452	0.029142	0.053403	799
BMgn007554	0.02915	0.055866	800
BMgn005210	0.02915	0.055866	801
BMgn016318	0.02915	0.055866	802
BMgn009124	0.029217	0.070778	803
BMgn008686	0.029246	0.063211	804
BMgn008649	0.029282	0.053639	805
BMgn009178	0.029389	0.043295	806
BMgn002477	0.029389	0.043295	807
BMgn004070	0.029389	0.043295	808
BMgn011412	0.029488	0.053975	809
BMgn000525	0.029514	0.054018	810
BMgn013316	0.029527	0.054049	811
BMgn003414	0.029575	0.063688	812
BMgn003162	0.029584	0.056537	813
BMgn012391	0.029585	0.056539	814
BMgn002789	0.029585	0.056539	815
BMgn017359	0.029648	0.056637	816
BMgn010156	0.029665	0.071756	817
BMgn011416	0.029669	0.054292	818
BMgn005824	0.029669	0.054292	819
BMgn017088	0.029669	0.054292	820
BMgn003754	0.029669	0.054292	821
BMgn006405	0.02986	0.043706	822
BMgn016104	0.029954	0.043782	823
BMgn002820	0.030177	0.057478	824
BMgn006508	0.030196	0.055156	825
BMgn003961	0.030218	0.030117	826
BMgn005126	0.030331	0.044114	827
BMgn005002	0.030331	0.044114	828
BMgn016025	0.030331	0.044114	829
BMgn005922	0.030406	0.055497	830
BMgn000104	0.030512	0.055666	831
BMgn009743	0.030512	0.055666	832
BMgn013400	0.03052	0.065067	833
BMgn005793	0.030527	0.055688	834
BMgn005578	0.030648	0.030538	835
BMgn017253	0.03066	0.058249	836
BMgn006026	0.030753	0.058391	837
BMgn014712	0.030757	0.056072	838
BMgn012809	0.030778	0.044504	839
BMgn013072	0.030809	0.05616	840
BMgn016645	0.030887	0.030773	841
BMgn010746	0.030904	0.056335	842
BMgn017254	0.030974	0.065764	843
BMgn016058	0.03099	0.044674	844
BMgn008441	0.031007	0.030893	845
BMgn014066	0.031038	0.056559	846
BMgn003457	0.031046	0.05657	847
BMgn005582	0.031108	0.056682	848
BMgn003974	0.03115	0.031042	849
BMgn017538	0.031266	0.059204	850
BMgn000326	0.031276	0.056967	851
BMgn009659	0.031319	0.057028	852
BMgn014343	0.031343	0.044996	853
BMgn011165	0.031343	0.044996	854
BMgn008682	0.031472	0.059544	855
BMgn016171	0.0315	0.059594	856
BMgn009730	0.031582	0.057488	857
BMgn013772	0.0316	0.057514	858
BMgn013977	0.031707	0.076073	859
BMgn011753	0.031719	0.057718	860
BMgn014972	0.031808	0.05785	861
BMgn015592	0.031869	0.057946	862
BMgn002656	0.031883	0.045485	863
BMgn002508	0.032225	0.032163	864
BMgn006666	0.032261	0.058625	865
BMgn001317	0.032401	0.045954	866
BMgn017451	0.032442	0.058917	867
BMgn009837	0.032542	0.046069	868
BMgn014588	0.032668	0.059305	869
BMgn008952	0.032695	0.061402	870
BMgn011778	0.032712	0.061427	871
BMgn017083	0.032765	0.059461	872
BMgn006649	0.032777	0.046286	873
BMgn015040	0.032777	0.046286	874
BMgn014084	0.032792	0.059512	875
BMgn010179	0.032792	0.059512	876
BMgn001223	0.032847	0.032809	877
BMgn007496	0.032848	0.059585	878
BMgn011973	0.032904	0.059679	879
BMgn012544	0.033085	0.062015	880
BMgn009359	0.03328	0.06033	881
BMgn008538	0.033283	0.060334	882
BMgn005658	0.033296	0.069199	883
BMgn003972	0.033363	0.062448	884
BMgn006726	0.033423	0.060568	885
BMgn007043	0.033478	0.069453	886
BMgn006931	0.033482	0.046921	887
BMgn014507	0.033505	0.062692	888
BMgn006090	0.033518	0.060719	889
BMgn016324	0.033539	0.060763	890
BMgn016390	0.033539	0.060763	891
BMgn010695	0.033563	0.060809	892
BMgn017287	0.033703	0.061066	893
BMgn009066	0.033767	0.069843	894
BMgn000733	0.033779	0.033716	895
BMgn015702	0.033826	0.033763	896
BMgn001466	0.033881	0.047257	897
BMgn006464	0.033881	0.047257	898
BMgn007545	0.033914	0.061433	899
BMgn009630	0.033942	0.080932	900
BMgn015390	0.033954	0.061496	901
BMgn014605	0.03401	0.061587	902
BMgn003880	0.034031	0.06163	903
BMgn004420	0.034041	0.033972	904
BMgn016814	0.034054	0.06166	905
BMgn016582	0.034088	0.070307	906
BMgn015954	0.034124	0.061773	907
BMgn007640	0.034208	0.061933	908
BMgn016833	0.034233	0.047565	909
BMgn010561	0.034511	0.064271	910
BMgn007230	0.034591	0.062583	911
BMgn009373	0.034612	0.062616	912
BMgn010220	0.034614	0.062618	913
BMgn009400	0.034669	0.064502	914
BMgn010625	0.034669	0.064502	915
BMgn007119	0.034669	0.064502	916
BMgn013759	0.034679	0.047926	917
BMgn011752	0.034797	0.062918	918
BMgn006981	0.034824	0.062972	919
BMgn015933	0.034844	0.048064	920
BMgn005776	0.034877	0.071469	921
BMgn010670	0.034938	0.048148	922
BMgn017215	0.03495	0.034917	923
BMgn010907	0.035028	0.065062	924
BMgn005380	0.035041	0.065092	925
BMgn007334	0.035045	0.071713	926
BMgn002432	0.035076	0.063401	927
BMgn008479	0.035079	0.048275	928
BMgn013743	0.035133	0.063506	929
BMgn008717	0.035176	0.06358	930
BMgn008459	0.035248	0.035206	931
BMgn006906	0.035248	0.035206	932
BMgn011890	0.035407	0.048571	933
BMgn014425	0.035407	0.048571	934
BMgn001131	0.035407	0.048571	935
BMgn002152	0.035407	0.048571	936
BMgn015068	0.035407	0.048571	937
BMgn016782	0.035499	0.035444	938
BMgn012423	0.03551	0.072427	939
BMgn012207	0.035595	0.035534	940
BMgn005580	0.035664	0.06441	941
BMgn010666	0.035666	0.035611	942
BMgn013420	0.035692	0.066135	943
BMgn002790	0.035736	0.048846	944
BMgn013566	0.035751	0.064533	945
BMgn017251	0.035751	0.064533	946
BMgn006818	0.035751	0.064533	947
BMgn002241	0.035751	0.064533	948
BMgn005373	0.035886	0.073019	949
BMgn015546	0.035894	0.035823	950
BMgn012639	0.036032	0.066675	951
BMgn017016	0.036407	0.036343	952
BMgn003143	0.036563	0.065891	953
BMgn006630	0.036638	0.067647	954
BMgn013729	0.036643	0.066014	955
BMgn007205	0.036651	0.049637	956
BMgn012773	0.036651	0.049637	957
BMgn000672	0.036651	0.049637	958
BMgn007944	0.036651	0.049637	959
BMgn017491	0.036651	0.049637	960
BMgn006322	0.036651	0.049637	961
BMgn000959	0.036651	0.049637	962
BMgn015617	0.036651	0.049637	963
BMgn015608	0.036837	0.036738	964
BMgn004828	0.036837	0.036738	965
BMgn015536	0.036837	0.036738	966
BMgn015393	0.036837	0.036738	967
BMgn009012	0.036837	0.036738	968
BMgn012073	0.036855	0.067975	969
BMgn009135	0.036885	0.066411	970
BMgn010250	0.036899	0.066436	971
BMgn008612	0.037075	0.066704	972
BMgn010704	0.037148	0.068437	973
BMgn016839	0.037149	0.066812	974
BMgn012996	0.037244	0.066959	975
BMgn011413	0.037249	0.074968	976
BMgn010882	0.037266	0.066979	977
BMgn007926	0.037331	0.05024	978
BMgn011600	0.037343	0.067108	979
BMgn002153	0.037343	0.067108	980
BMgn007317	0.037343	0.067108	981
BMgn001670	0.037343	0.067108	982
BMgn016146	0.037387	0.037309	983
BMgn004629	0.037391	0.067194	984
BMgn007799	0.037411	0.037339	985
BMgn000587	0.037425	0.050324	986
BMgn007236	0.037435	0.037361	987
BMgn014748	0.037472	0.067329	988
BMgn004394	0.03762	0.067567	989
BMgn002535	0.037769	0.037722	990
BMgn016518	0.0378	0.050662	991
BMgn010556	0.0378	0.050662	992
BMgn005157	0.037886	0.068039	993
BMgn005267	0.037969	0.069714	994
BMgn015259	0.03799	0.068218	995
BMgn014699	0.038116	0.068445	996
BMgn006746	0.038128	0.050976	997
BMgn005727	0.038128	0.050976	998
BMgn014558	0.038272	0.068697	999
BMgn005237	0.038315	0.051154	1000
BMgn012851	0.038331	0.038231	1001
BMgn012567	0.038331	0.038231	1002
BMgn011672	0.038409	0.051244	1003
BMgn016967	0.03846	0.069004	1004
BMgn001112	0.038511	0.069092	1005
BMgn002527	0.038582	0.038495	1006
BMgn004444	0.038596	0.051437	1007
BMgn011884	0.038678	0.038602	1008
BMgn017113	0.038714	0.05154	1009
BMgn004957	0.03875	0.069483	1010
BMgn006545	0.038773	0.03869	1011
BMgn015672	0.038784	0.051593	1012
BMgn000938	0.038964	0.038892	1013
BMgn001286	0.038975	0.069863	1014
BMgn010169	0.039019	0.069927	1015
BMgn017161	0.039019	0.069927	1016
BMgn010912	0.039037	0.071405	1017
BMgn001068	0.039065	0.070017	1018
BMgn006638	0.039155	0.070166	1019
BMgn002169	0.039203	0.03912	1020
BMgn007424	0.03922	0.071687	1021
BMgn016016	0.039245	0.070326	1022
BMgn003914	0.039276	0.052062	1023
BMgn003785	0.039276	0.052062	1024
BMgn003710	0.039276	0.052062	1025
BMgn016819	0.039299	0.039223	1026
BMgn005078	0.039321	0.070452	1027
BMgn010729	0.039336	0.070473	1028
BMgn012082	0.039361	0.071904	1029
BMgn012005	0.039517	0.07078	1030
BMgn001806	0.039577	0.070886	1031
BMgn004764	0.039592	0.070917	1032
BMgn001041	0.039674	0.052406	1033
BMgn007042	0.039779	0.072591	1034
BMgn007875	0.039813	0.03972	1035
BMgn008906	0.039813	0.03972	1036
BMgn002244	0.039849	0.072711	1037
BMgn013659	0.040004	0.072969	1038
BMgn004163	0.040032	0.071639	1039
BMgn015090	0.040032	0.071639	1040
BMgn006465	0.040032	0.071639	1041
BMgn013157	0.040259	0.052951	1042
BMgn000695	0.040259	0.052951	1043
BMgn011275	0.040259	0.052951	1044
BMgn005623	0.040292	0.079477	1045
BMgn017323	0.040458	0.072374	1046
BMgn015510	0.040461	0.073691	1047
BMgn014674	0.040624	0.072659	1048
BMgn004419	0.040624	0.072659	1049
BMgn010857	0.040624	0.072659	1050
BMgn003306	0.040624	0.072659	1051
BMgn004781	0.040624	0.072659	1052
BMgn001471	0.040624	0.072659	1053
BMgn008295	0.040649	0.073987	1054
BMgn009296	0.040793	0.080193	1055
BMgn010221	0.040879	0.074336	1056
BMgn009815	0.040891	0.074355	1057
BMgn010535	0.040915	0.053535	1058
BMgn002334	0.04096	0.040854	1059
BMgn015020	0.041063	0.073385	1060
BMgn002460	0.041067	0.074625	1061
BMgn011027	0.041306	0.041222	1062
BMgn013955	0.041306	0.041222	1063
BMgn017047	0.041306	0.041222	1064
BMgn001400	0.041321	0.073832	1065
BMgn000706	0.041617	0.041552	1066
BMgn007581	0.041624	0.075487	1067
BMgn002582	0.041624	0.075487	1068
BMgn009546	0.041687	0.054225	1069
BMgn016150	0.041687	0.054225	1070
BMgn000813	0.041687	0.054225	1071
BMgn002785	0.041687	0.054225	1072
BMgn001658	0.041687	0.054225	1073
BMgn008296	0.041689	0.041625	1074
BMgn003476	0.041832	0.041759	1075
BMgn013133	0.041951	0.041868	1076
BMgn013422	0.0421	0.076217	1077
BMgn005127	0.042106	0.075142	1078
BMgn014722	0.042223	0.082356	1079
BMgn013005	0.042308	0.075465	1080
BMgn006601	0.042397	0.076688	1081
BMgn004661	0.042777	0.076278	1082
BMgn015130	0.042792	0.076308	1083
BMgn016218	0.042951	0.077585	1084
BMgn007728	0.042993	0.076632	1085
BMgn006045	0.043137	0.055493	1086
BMgn014874	0.043137	0.055493	1087
BMgn016009	0.043146	0.08375	1088
BMgn000106	0.043185	0.076949	1089
BMgn014749	0.043218	0.04317	1090
BMgn015143	0.043303	0.077154	1091
BMgn009568	0.043337	0.078154	1092
BMgn012690	0.043498	0.07843	1093
BMgn013382	0.043541	0.043498	1094
BMgn004857	0.043642	0.077731	1095
BMgn013013	0.043657	0.07776	1096
BMgn013540	0.043667	0.078687	1097
BMgn001212	0.043681	0.077795	1098
BMgn011439	0.043681	0.077795	1099
BMgn001482	0.043696	0.043647	1100
BMgn006515	0.043759	0.077926	1101
BMgn004667	0.043759	0.077926	1102
BMgn012958	0.04378	0.043729	1103
BMgn012517	0.04378	0.043729	1104
BMgn016903	0.043788	0.078863	1105
BMgn017245	0.04382	0.078925	1106
BMgn015076	0.04382	0.078925	1107
BMgn002359	0.043847	0.078077	1108
BMgn013897	0.043852	0.078976	1109
BMgn006223	0.04399	0.078296	1110
BMgn006542	0.043992	0.085002	1111
BMgn013996	0.044033	0.085075	1112
BMgn000728	0.044069	0.08512	1113
BMgn011907	0.044116	0.078506	1114
BMgn013139	0.04415	0.044097	1115
BMgn003153	0.044188	0.056431	1116
BMgn000904	0.044385	0.078939	1117
BMgn009468	0.044496	0.044464	1118
BMgn006828	0.044496	0.044464	1119
BMgn011692	0.044632	0.056826	1120
BMgn006166	0.044684	0.080255	1121
BMgn016537	0.044719	0.080313	1122
BMgn012165	0.044772	0.05695	1123
BMgn002845	0.044801	0.079654	1124
BMgn006681	0.044819	0.056989	1125
BMgn017105	0.044849	0.080496	1126
BMgn013315	0.044871	0.080532	1127
BMgn010136	0.044958	0.080676	1128
BMgn016281	0.044993	0.079984	1129
BMgn003448	0.045076	0.057201	1130
BMgn011095	0.045076	0.057201	1131
BMgn012202	0.045083	0.096646	1132
BMgn009547	0.045146	0.057271	1133
BMgn012422	0.04515	0.080229	1134
BMgn016587	0.04515	0.080229	1135
BMgn010797	0.04515	0.080229	1136
BMgn004350	0.04538	0.057466	1137
BMgn013608	0.045394	0.080623	1138
BMgn006810	0.045464	0.045481	1139
BMgn002523	0.045555	0.08088	1140
BMgn015236	0.045587	0.087346	1141
BMgn009013	0.045658	0.081716	1142
BMgn010619	0.045658	0.081716	1143
BMgn007082	0.045706	0.057754	1144
BMgn000496	0.045727	0.045731	1145
BMgn010718	0.045811	0.045794	1146
BMgn016615	0.04587	0.057916	1147
BMgn010928	0.045976	0.082242	1148
BMgn009016	0.045987	0.058022	1149
BMgn004465	0.046141	0.082473	1150
BMgn011742	0.046169	0.081874	1151
BMgn008376	0.04624	0.088296	1152
BMgn006201	0.04624	0.088296	1153
BMgn002483	0.04624	0.088296	1154
BMgn013846	0.046253	0.082637	1155
BMgn013018	0.046313	0.058298	1156
BMgn010317	0.046313	0.058298	1157
BMgn012758	0.046313	0.058298	1158
BMgn004056	0.046468	0.046455	1159
BMgn007984	0.046468	0.046455	1160
BMgn016671	0.046493	0.082434	1161
BMgn008079	0.046593	0.05852	1162
BMgn003161	0.046605	0.083183	1163
BMgn004817	0.04664	0.058566	1164
BMgn012775	0.046827	0.058732	1165
BMgn008600	0.046843	0.083014	1166
BMgn012470	0.046843	0.083014	1167
BMgn016191	0.04691	0.04689	1168
BMgn006922	0.04696	0.083742	1169
BMgn009868	0.04697	0.046954	1170
BMgn008914	0.047013	0.058888	1171
BMgn012821	0.047095	0.083428	1172
BMgn011747	0.047096	0.083429	1173
BMgn000369	0.047137	0.08349	1174
BMgn011998	0.047164	0.083538	1175
BMgn017058	0.047249	0.084154	1176
BMgn005446	0.047293	0.059136	1177
BMgn007131	0.047386	0.05922	1178
BMgn012789	0.047442	0.083992	1179
BMgn014521	0.047442	0.083992	1180
BMgn015133	0.047448	0.047439	1181
BMgn003600	0.047567	0.047563	1182
BMgn007162	0.047682	0.084813	1183
BMgn003760	0.047858	0.084659	1184
BMgn012127	0.047997	0.084907	1185
BMgn014747	0.048041	0.085338	1186
BMgn015189	0.048097	0.085414	1187
BMgn017221	0.048143	0.085491	1188
BMgn014652	0.048156	0.059844	1189
BMgn000829	0.048224	0.048219	1190
BMgn007014	0.048274	0.08539	1191
BMgn010228	0.04876	0.08615	1192
BMgn004860	0.048833	0.086541	1193
BMgn011914	0.048957	0.092244	1194
BMgn008507	0.049018	0.060633	1195
BMgn007744	0.049065	0.060671	1196
BMgn015669	0.049073	0.049133	1197
BMgn011257	0.049384	0.086643	1198
BMgn007477	0.049478	0.087566	1199
BMgn012083	0.049478	0.087566	1200
BMgn016190	0.049478	0.087566	1201
BMgn007499	0.049522	0.086765	1202
BMgn005337	0.049554	0.061099	1203
BMgn005091	0.049554	0.061099	1204
BMgn003608	0.049554	0.061099	1205
BMgn010391	0.049588	0.093191	1206
BMgn012326	0.049742	0.049835	1207
BMgn003776	0.049814	0.088095	1208
BMgn014600	0.049814	0.088095	1209
BMgn011304	0.049837	0.049923	1210
BMgn013690	0.049861	0.049945	1211
BMgn001005	0.050137	0.061617	1212
BMgn015758	0.050183	0.06166	1213
BMgn000199	0.050292	0.050361	1214
BMgn010304	0.050323	0.06179	1215
BMgn004362	0.050389	0.087421	1216
BMgn004069	0.050389	0.087421	1217
BMgn011307	0.050389	0.087421	1218
BMgn012282	0.050488	0.089141	1219
BMgn009253	0.050545	0.089235	1220
BMgn005046	0.050649	0.062077	1221
BMgn006588	0.050696	0.062115	1222
BMgn000345	0.050742	0.062156	1223
BMgn006007	0.050765	0.089574	1224
BMgn007824	0.050857	0.089717	1225
BMgn009398	0.050958	0.089863	1226
BMgn008655	0.051041	0.089981	1227
BMgn000955	0.051046	0.087936	1228
BMgn014775	0.051063	0.095352	1229
BMgn001127	0.051092	0.051143	1230
BMgn017115	0.051116	0.087975	1231
BMgn003712	0.051185	0.088033	1232
BMgn008501	0.051208	0.062568	1233
BMgn016252	0.051208	0.062568	1234
BMgn016317	0.051208	0.062568	1235
BMgn003705	0.051208	0.062568	1236
BMgn000092	0.051208	0.062568	1237
BMgn003943	0.051358	0.088168	1238
BMgn003350	0.051358	0.088168	1239
BMgn003396	0.051684	0.090976	1240
BMgn010366	0.051684	0.090976	1241
BMgn016779	0.051739	0.088437	1242
BMgn014243	0.051773	0.051834	1243
BMgn002179	0.051859	0.063149	1244
BMgn013761	0.052158	0.091707	1245
BMgn013053	0.052185	0.063436	1246
BMgn006412	0.052299	0.052359	1247
BMgn003590	0.052299	0.052359	1248
BMgn005291	0.052299	0.052359	1249
BMgn010173	0.052299	0.052359	1250
BMgn005914	0.052418	0.063641	1251
BMgn014122	0.052437	0.092153	1252
BMgn007771	0.052511	0.09228	1253
BMgn005061	0.052557	0.063767	1254
BMgn004610	0.052635	0.092468	1255
BMgn010400	0.052638	0.089171	1256
BMgn004145	0.052638	0.089171	1257
BMgn008919	0.052638	0.089171	1258
BMgn000803	0.052638	0.089171	1259
BMgn007656	0.05265	0.063852	1260
BMgn006265	0.052697	0.063895	1261
BMgn006216	0.052753	0.052807	1262
BMgn009671	0.052786	0.092697	1263
BMgn007479	0.052796	0.097862	1264
BMgn008396	0.052796	0.097862	1265
BMgn015638	0.05281	0.092735	1266
BMgn008508	0.05286	0.064037	1267
BMgn009937	0.05286	0.064037	1268
BMgn008560	0.052973	0.092977	1269
BMgn016995	0.053061	0.093127	1270
BMgn015591	0.053191	0.089581	1271
BMgn015972	0.0532	0.098496	1272
BMgn016581	0.053395	0.064518	1273
BMgn010604	0.053395	0.064518	1274
BMgn011131	0.053537	0.10801	1275
BMgn010629	0.053606	0.089921	1276
BMgn005698	0.053795	0.094322	1277
BMgn003388	0.053852	0.053868	1278
BMgn002747	0.054046	0.065121	1279
BMgn004837	0.05424	0.095006	1280
BMgn002020	0.05424	0.095006	1281
BMgn004974	0.05424	0.095006	1282
BMgn005631	0.05424	0.095006	1283
BMgn004944	0.05424	0.095006	1284
BMgn008148	0.054278	0.065334	1285
BMgn000815	0.054371	0.065433	1286
BMgn003857	0.054397	0.10026	1287
BMgn013610	0.054417	0.065478	1288
BMgn009449	0.054437	0.095322	1289
BMgn004931	0.054469	0.090602	1290
BMgn004805	0.054469	0.090602	1291
BMgn009071	0.054469	0.090602	1292
BMgn007929	0.05449	0.10041	1293
BMgn006811	0.05451	0.065557	1294
BMgn008422	0.05462	0.095611	1295
BMgn008235	0.054713	0.054677	1296
BMgn005426	0.054713	0.054677	1297
BMgn007863	0.054713	0.054677	1298
BMgn002977	0.054713	0.054677	1299
BMgn002405	0.054713	0.054677	1300
BMgn011615	0.05474	0.10077	1301
BMgn002193	0.054895	0.096043	1302
BMgn009802	0.055125	0.091145	1303
BMgn006449	0.055161	0.066158	1304
BMgn016554	0.05517	0.096446	1305
BMgn015992	0.055367	0.091335	1306
BMgn000655	0.055429	0.055368	1307
BMgn016243	0.055477	0.055409	1308
BMgn008098	0.05552	0.096938	1309
BMgn005107	0.055544	0.096979	1310
BMgn009641	0.055582	0.10206	1311
BMgn012674	0.055592	0.097049	1312
BMgn014957	0.055664	0.11089	1313
BMgn001051	0.055746	0.091625	1314
BMgn014725	0.055858	0.066752	1315
BMgn000484	0.055903	0.097537	1316
BMgn006613	0.055913	0.10252	1317
BMgn017167	0.055949	0.097605	1318
BMgn010139	0.05595	0.066824	1319
BMgn016181	0.056003	0.055934	1320
BMgn012893	0.056051	0.055989	1321
BMgn016015	0.056069	0.097794	1322
BMgn001009	0.05609	0.066942	1323
BMgn000254	0.056129	0.097877	1324
BMgn013268	0.05616	0.091919	1325
BMgn010829	0.05616	0.091919	1326
BMgn015217	0.056224	0.098035	1327
BMgn005533	0.056229	0.067085	1328
BMgn008253	0.056318	0.11173	1329
BMgn006341	0.056406	0.098328	1330
BMgn002176	0.056461	0.067275	1331
BMgn006749	0.056481	0.056409	1332
BMgn008641	0.0565	0.098476	1333
BMgn004906	0.056508	0.06732	1334
BMgn007988	0.056647	0.067456	1335
BMgn014539	0.056692	0.098751	1336
BMgn000831	0.056788	0.098909	1337
BMgn015597	0.056933	0.099114	1338
BMgn001302	0.057092	0.099363	1339
BMgn016447	0.057126	0.09266	1340
BMgn013044	0.057173	0.099493	1341
BMgn002111	0.057195	0.092713	1342
BMgn010225	0.057222	0.099563	1343
BMgn012759	0.057259	0.10449	1344
BMgn011028	0.057317	0.057272	1345
BMgn006751	0.057317	0.057272	1346
BMgn009693	0.057317	0.057272	1347
BMgn011042	0.057505	0.068223	1348
BMgn001782	0.057505	0.068223	1349
BMgn008809	0.057535	0.10005	1350
BMgn007046	0.057746	0.093127	1351
BMgn007768	0.057771	0.057733	1352
BMgn004203	0.057915	0.10066	1353
BMgn003795	0.057915	0.10066	1354
BMgn011513	0.057915	0.10066	1355
BMgn000294	0.057915	0.10066	1356
BMgn007092	0.057923	0.10067	1357
BMgn015334	0.05799	0.10552	1358
BMgn013242	0.05802	0.10081	1359
BMgn001508	0.058058	0.058035	1360
BMgn006454	0.058178	0.058152	1361
BMgn004073	0.058317	0.068926	1362
BMgn014608	0.058364	0.068968	1363
BMgn015634	0.058381	0.058341	1364
BMgn003923	0.058417	0.05837	1365
BMgn003428	0.058488	0.058437	1366
BMgn001080	0.058555	0.10165	1367
BMgn007388	0.058617	0.10645	1368
BMgn015832	0.058827	0.069367	1369
BMgn014735	0.058874	0.069406	1370
BMgn013902	0.059005	0.10235	1371
BMgn006604	0.059005	0.10235	1372
BMgn012055	0.059054	0.09414	1373
BMgn013986	0.059192	0.094249	1374
BMgn008359	0.059194	0.10268	1375
BMgn007637	0.059249	0.10739	1376
BMgn002719	0.059523	0.069984	1377
BMgn014636	0.059523	0.069984	1378
BMgn008266	0.059523	0.069984	1379
BMgn002906	0.059647	0.059621	1380
BMgn013136	0.059647	0.059621	1381
BMgn016796	0.059742	0.10353	1382
BMgn013024	0.059742	0.10353	1383
BMgn002380	0.059777	0.094716	1384
BMgn010064	0.059777	0.094716	1385
BMgn001243	0.059777	0.094716	1386
BMgn005612	0.059777	0.094716	1387
BMgn017537	0.059777	0.094716	1388
BMgn010698	0.059777	0.094716	1389
BMgn010372	0.059851	0.10832	1390
BMgn011234	0.059936	0.10382	1391
BMgn010068	0.060096	0.10866	1392
BMgn011477	0.060125	0.070504	1393
BMgn007513	0.060125	0.070504	1394
BMgn003377	0.060362	0.095176	1395
BMgn002107	0.060381	0.10451	1396
BMgn000483	0.060472	0.10466	1397
BMgn004041	0.060496	0.070846	1398
BMgn013497	0.060499	0.095285	1399
BMgn003977	0.06052	0.060521	1400
BMgn010382	0.060727	0.071045	1401
BMgn011020	0.06074	0.095479	1402
BMgn000599	0.060774	0.071085	1403
BMgn004505	0.060886	0.10525	1404
BMgn007306	0.060936	0.07122	1405
BMgn001032	0.060997	0.060998	1406
BMgn002390	0.061117	0.061111	1407
BMgn010565	0.061237	0.071467	1408
BMgn013530	0.061247	0.10583	1409
BMgn012233	0.061256	0.095852	1410
BMgn010171	0.061283	0.071516	1411
BMgn003888	0.061319	0.10595	1412
BMgn010920	0.061324	0.095903	1413
BMgn001552	0.061535	0.061515	1414
BMgn009047	0.061563	0.11078	1415
BMgn002505	0.061703	0.10655	1416
BMgn014398	0.061839	0.07202	1417
BMgn014432	0.061874	0.096337	1418
BMgn014601	0.061874	0.096337	1419
BMgn009744	0.061874	0.096337	1420
BMgn007245	0.062097	0.062064	1421
BMgn014851	0.062204	0.10735	1422
BMgn011721	0.062255	0.072393	1423
BMgn010447	0.062255	0.072393	1424
BMgn015031	0.062255	0.072393	1425
BMgn004109	0.0623	0.062283	1426
BMgn013218	0.062315	0.11186	1427
BMgn010798	0.062431	0.062407	1428
BMgn004583	0.062527	0.096851	1429
BMgn010994	0.062702	0.10813	1430
BMgn006209	0.062708	0.11244	1431
BMgn006974	0.062957	0.062906	1432
BMgn011594	0.062957	0.062906	1433
BMgn011797	0.062978	0.10857	1434
BMgn011235	0.062996	0.073086	1435
BMgn002435	0.063158	0.073233	1436
BMgn012341	0.063316	0.097437	1437
BMgn006723	0.063366	0.073402	1438
BMgn000658	0.063482	0.073506	1439
BMgn014097	0.063591	0.09764	1440
BMgn000413	0.063597	0.073624	1441
BMgn011068	0.063732	0.10974	1442
BMgn006287	0.063933	0.11004	1443
BMgn009055	0.064002	0.097934	1444
BMgn008515	0.064002	0.097934	1445
BMgn006692	0.064452	0.11086	1446
BMgn005780	0.064479	0.11091	1447
BMgn000666	0.064551	0.098368	1448
BMgn011775	0.064595	0.11519	1449
BMgn010572	0.064614	0.074538	1450
BMgn000551	0.064614	0.074538	1451
BMgn007622	0.064642	0.11118	1452
BMgn000228	0.064821	0.064836	1453
BMgn015946	0.064998	0.11176	1454
BMgn001118	0.065074	0.11187	1455
BMgn013396	0.065099	0.098805	1456
BMgn015856	0.065261	0.075132	1457
BMgn000129	0.065305	0.098975	1458
BMgn013650	0.065346	0.11623	1459
BMgn001818	0.065346	0.11623	1460
BMgn011222	0.065354	0.075222	1461
BMgn001961	0.065371	0.06541	1462
BMgn008107	0.065388	0.11239	1463
BMgn008316	0.065514	0.065541	1464
BMgn003167	0.065705	0.065733	1465
BMgn003644	0.06577	0.075594	1466
BMgn007125	0.065816	0.075639	1467
BMgn011073	0.065887	0.099445	1468
BMgn012451	0.065887	0.099445	1469
BMgn004057	0.066001	0.075816	1470
BMgn017157	0.066024	0.11339	1471
BMgn015700	0.066115	0.11354	1472
BMgn004421	0.066116	0.075915	1473
BMgn014003	0.066133	0.11734	1474
BMgn013827	0.066145	0.1136	1475
BMgn010101	0.066145	0.1136	1476
BMgn005322	0.066145	0.1136	1477
BMgn016979	0.066145	0.1136	1478
BMgn012509	0.066185	0.075966	1479
BMgn013987	0.066195	0.066253	1480
BMgn009290	0.066324	0.076091	1481
BMgn003991	0.066462	0.076214	1482
BMgn008491	0.066614	0.11433	1483
BMgn004915	0.066614	0.11433	1484
BMgn004668	0.066675	0.10009	1485
BMgn001849	0.066709	0.066766	1486
BMgn004373	0.066757	0.066813	1487
BMgn000754	0.066924	0.076627	1488
BMgn003852	0.066924	0.076627	1489
BMgn004167	0.066924	0.076627	1490
BMgn007083	0.066924	0.076627	1491
BMgn010357	0.066924	0.076627	1492
BMgn000906	0.067159	0.1152	1493
BMgn007116	0.06727	0.067307	1494
BMgn006346	0.067293	0.076969	1495
BMgn004960	0.067352	0.1155	1496
BMgn011254	0.067403	0.11559	1497
BMgn012978	0.067428	0.1007	1498
BMgn007380	0.067478	0.077126	1499
BMgn002763	0.067547	0.077187	1500
BMgn015502	0.067617	0.077247	1501
BMgn011623	0.067633	0.10085	1502
BMgn002774	0.067686	0.077306	1503
BMgn003681	0.067686	0.077306	1504
BMgn001876	0.067701	0.06772	1505
BMgn015841	0.067749	0.11965	1506
BMgn016051	0.06794	0.07753	1507
BMgn013100	0.068055	0.077629	1508
BMgn014132	0.068058	0.12009	1509
BMgn002005	0.06817	0.077738	1510
BMgn008854	0.068181	0.10124	1511
BMgn012827	0.068191	0.068191	1512
BMgn012004	0.068216	0.077776	1513
BMgn005497	0.068263	0.077821	1514
BMgn006654	0.068269	0.11692	1515
BMgn008364	0.068358	0.068362	1516
BMgn003289	0.068406	0.068418	1517
BMgn000194	0.068447	0.078009	1518
BMgn015778	0.06848	0.12071	1519
BMgn010510	0.068501	0.068513	1520
BMgn002998	0.068585	0.068592	1521
BMgn009335	0.068659	0.10164	1522
BMgn015902	0.068659	0.10164	1523
BMgn016550	0.068668	0.068675	1524
BMgn002375	0.068724	0.11762	1525
BMgn012947	0.06877	0.078326	1526
BMgn010462	0.068836	0.11779	1527
BMgn014452	0.068853	0.11781	1528
BMgn008176	0.069044	0.12151	1529
BMgn002413	0.069166	0.11829	1530
BMgn015955	0.069254	0.078761	1531
BMgn013923	0.069254	0.078761	1532
BMgn006158	0.069274	0.10212	1533
BMgn006504	0.069343	0.10218	1534
BMgn015321	0.069481	0.069498	1535
BMgn011584	0.069481	0.069498	1536
BMgn011311	0.069481	0.069498	1537
BMgn010159	0.069481	0.069498	1538
BMgn008308	0.069635	0.11903	1539
BMgn003059	0.069635	0.11903	1540
BMgn000198	0.069646	0.079124	1541
BMgn015228	0.069784	0.079242	1542
BMgn011539	0.069821	0.10253	1543
BMgn008564	0.06983	0.079287	1544
BMgn002911	0.070026	0.10268	1545
BMgn003345	0.070107	0.079535	1546
BMgn015312	0.07029	0.12003	1547
BMgn007959	0.070383	0.079778	1548
BMgn016683	0.070437	0.070396	1549
BMgn011677	0.070499	0.079878	1550
BMgn013785	0.070504	0.10304	1551
BMgn013409	0.070556	0.12046	1552
BMgn010707	0.070614	0.079986	1553
BMgn017294	0.070631	0.12058	1554
BMgn008637	0.070777	0.10328	1555
BMgn007661	0.070819	0.070791	1556
BMgn006178	0.07089	0.080227	1557
BMgn008127	0.070918	0.121	1558
BMgn004838	0.070927	0.070915	1559
BMgn003910	0.070982	0.080302	1560
BMgn016609	0.071099	0.12128	1561
BMgn007960	0.07113	0.071111	1562
BMgn013411	0.07119	0.071167	1563
BMgn006362	0.07121	0.12144	1564
BMgn004698	0.071357	0.10372	1565
BMgn000428	0.071357	0.10372	1566
BMgn000963	0.071357	0.10372	1567
BMgn008922	0.071357	0.10372	1568
BMgn012142	0.071357	0.10372	1569
BMgn005292	0.071357	0.10372	1570
BMgn000846	0.071357	0.10372	1571
BMgn004241	0.071443	0.080739	1572
BMgn012146	0.071458	0.12494	1573
BMgn011112	0.071751	0.071724	1574
BMgn008291	0.071809	0.13247	1575
BMgn000561	0.07187	0.12247	1576
BMgn012910	0.071937	0.10418	1577
BMgn005769	0.071958	0.1226	1578
BMgn013926	0.072014	0.071968	1579
BMgn017489	0.072214	0.12299	1580
BMgn004276	0.072277	0.072245	1581
BMgn016761	0.072312	0.10449	1582
BMgn010365	0.072318	0.081507	1583
BMgn010089	0.072318	0.081507	1584
BMgn011388	0.072318	0.081507	1585
BMgn015137	0.072318	0.081507	1586
BMgn008552	0.072318	0.081507	1587
BMgn003986	0.072415	0.10457	1588
BMgn001312	0.072483	0.10463	1589
BMgn004851	0.072537	0.12652	1590
BMgn014711	0.072824	0.1049	1591
BMgn014881	0.072923	0.12709	1592
BMgn004806	0.073269	0.073234	1593
BMgn004454	0.073269	0.073234	1594
BMgn015350	0.073269	0.073234	1595
BMgn008221	0.073403	0.10533	1596
BMgn002949	0.073403	0.10533	1597
BMgn017073	0.073403	0.10533	1598
BMgn000949	0.073403	0.10533	1599
BMgn005600	0.073403	0.10533	1600
BMgn007602	0.073705	0.12535	1601
BMgn017168	0.073705	0.12535	1602
BMgn012660	0.073705	0.12535	1603
BMgn002624	0.073705	0.12535	1604
BMgn013458	0.073836	0.082865	1605
BMgn015136	0.073928	0.082947	1606
BMgn005369	0.074045	0.12865	1607
BMgn000896	0.074066	0.083065	1608
BMgn004911	0.074575	0.12666	1609
BMgn009321	0.074641	0.083577	1610
BMgn010940	0.07471	0.083651	1611
BMgn012561	0.074799	0.10646	1612
BMgn000560	0.074834	0.074791	1613
BMgn003997	0.074935	0.10655	1614
BMgn009532	0.075145	0.075095	1615
BMgn002551	0.075193	0.084089	1616
BMgn001225	0.075193	0.084089	1617
BMgn014770	0.075193	0.084089	1618
BMgn007708	0.075193	0.084089	1619
BMgn016042	0.075193	0.084089	1620
BMgn009735	0.075193	0.084089	1621
BMgn007731	0.075477	0.12804	1622
BMgn012684	0.075515	0.075482	1623
BMgn006135	0.075613	0.12828	1624
BMgn014694	0.075718	0.075685	1625
BMgn017374	0.07579	0.084693	1626
BMgn006664	0.075793	0.12858	1627
BMgn008574	0.07582	0.10728	1628
BMgn003483	0.07582	0.10728	1629
BMgn010458	0.07582	0.10728	1630
BMgn013063	0.075936	0.12879	1631
BMgn013451	0.075937	0.1314	1632
BMgn006068	0.075963	0.13145	1633
BMgn000333	0.076071	0.129	1634
BMgn015665	0.076154	0.12911	1635
BMgn002373	0.076273	0.085148	1636
BMgn007899	0.076479	0.085331	1637
BMgn006992	0.076594	0.085421	1638
BMgn006674	0.076681	0.12991	1639
BMgn003211	0.076686	0.085502	1640
BMgn003823	0.076778	0.085573	1641
BMgn009648	0.07686	0.13273	1642
BMgn015520	0.076865	0.076877	1643
BMgn016075	0.076908	0.10816	1644
BMgn005975	0.076916	0.085706	1645
BMgn016703	0.077007	0.08579	1646
BMgn002426	0.077009	0.13042	1647
BMgn011193	0.077009	0.13042	1648
BMgn013179	0.077009	0.13042	1649
BMgn011090	0.077009	0.13042	1650
BMgn015140	0.077145	0.085894	1651
BMgn002973	0.077191	0.085932	1652
BMgn000652	0.077224	0.13074	1653
BMgn002698	0.077306	0.086044	1654
BMgn002589	0.077306	0.086044	1655
BMgn005995	0.077374	0.13097	1656
BMgn012155	0.077383	0.10856	1657
BMgn016871	0.077451	0.10861	1658
BMgn001991	0.077498	0.077526	1659
BMgn010839	0.077604	0.086324	1660
BMgn015674	0.07763	0.077662	1661
BMgn009650	0.077702	0.07774	1662
BMgn007026	0.077725	0.077761	1663
BMgn003829	0.077791	0.1089	1664
BMgn015385	0.07804	0.086686	1665
BMgn009963	0.07804	0.086686	1666
BMgn015650	0.07804	0.086686	1667
BMgn009481	0.07804	0.086686	1668
BMgn010927	0.078063	0.10912	1669
BMgn004633	0.078156	0.078209	1670
BMgn013223	0.07826	0.13469	1671
BMgn014143	0.078334	0.10934	1672
BMgn014960	0.078467	0.13267	1673
BMgn010716	0.078586	0.078643	1674
BMgn004007	0.07866	0.087259	1675
BMgn014743	0.078686	0.13303	1676
BMgn013173	0.078706	0.087301	1677
BMgn001855	0.078782	0.13319	1678
BMgn014334	0.078801	0.078857	1679
BMgn013160	0.078873	0.078928	1680
BMgn014068	0.078933	0.13339	1681
BMgn005341	0.078933	0.13339	1682
BMgn004908	0.078968	0.079022	1683
BMgn003478	0.079013	0.10991	1684
BMgn005102	0.079013	0.10991	1685
BMgn001927	0.079013	0.10991	1686
BMgn006453	0.079013	0.10991	1687
BMgn014858	0.079027	0.087604	1688
BMgn005204	0.079066	0.13582	1689
BMgn011180	0.07907	0.1336	1690
BMgn005159	0.079118	0.087674	1691
BMgn010819	0.079183	0.079252	1692
BMgn016208	0.079279	0.079359	1693
BMgn002830	0.079318	0.13397	1694
BMgn016649	0.079439	0.087978	1695
BMgn005129	0.079485	0.088012	1696
BMgn006578	0.079692	0.11045	1697
BMgn016501	0.079715	0.088212	1698
BMgn008954	0.079806	0.088285	1699
BMgn009377	0.079825	0.13695	1700
BMgn012224	0.079938	0.13712	1701
BMgn001755	0.079938	0.13712	1702
BMgn012659	0.080065	0.11075	1703
BMgn016880	0.080081	0.088528	1704
BMgn001165	0.080103	0.080172	1705
BMgn004753	0.080103	0.080172	1706
BMgn007351	0.080227	0.13533	1707
BMgn012663	0.080497	0.13796	1708
BMgn014803	0.080832	0.13846	1709
BMgn002189	0.080906	0.08927	1710
BMgn002792	0.080906	0.08927	1711
BMgn009842	0.080906	0.08927	1712
BMgn016768	0.080906	0.08927	1713
BMgn010588	0.080906	0.08927	1714
BMgn001879	0.081008	0.13651	1715
BMgn015720	0.081095	0.081121	1716
BMgn015450	0.081119	0.081146	1717
BMgn014383	0.081406	0.081443	1718
BMgn005053	0.08141	0.089725	1719
BMgn010286	0.081475	0.13725	1720
BMgn008209	0.081475	0.13725	1721
BMgn008353	0.081475	0.13725	1722
BMgn008394	0.081594	0.1456	1723
BMgn016147	0.081636	0.13747	1724
BMgn016389	0.081657	0.11201	1725
BMgn003730	0.08196	0.090226	1726
BMgn005045	0.082006	0.090275	1727
BMgn012625	0.082165	0.1124	1728
BMgn003531	0.082165	0.1124	1729
BMgn002602	0.082165	0.1124	1730
BMgn003312	0.082165	0.1124	1731
BMgn010005	0.082174	0.13825	1732
BMgn002476	0.082235	0.090475	1733
BMgn014064	0.082395	0.090621	1734
BMgn013592	0.082399	0.14075	1735
BMgn008052	0.082445	0.082462	1736
BMgn012720	0.08245	0.13867	1737
BMgn000348	0.08247	0.11263	1738
BMgn004905	0.082471	0.14677	1739
BMgn017054	0.082492	0.13873	1740
BMgn002735	0.082509	0.090709	1741
BMgn010941	0.082712	0.13906	1742
BMgn009726	0.08283	0.091	1743
BMgn006995	0.082891	0.13933	1744
BMgn007312	0.082953	0.13944	1745
BMgn013612	0.082983	0.082995	1746
BMgn012325	0.083036	0.091177	1747
BMgn016532	0.083127	0.091263	1748
BMgn013834	0.083556	0.083543	1749
BMgn002557	0.08362	0.11354	1750
BMgn001657	0.083791	0.091857	1751
BMgn012287	0.083791	0.091857	1752
BMgn011659	0.083791	0.091857	1753
BMgn005252	0.083791	0.091857	1754
BMgn006196	0.083891	0.11377	1755
BMgn003607	0.083935	0.1409	1756
BMgn001382	0.084127	0.11395	1757
BMgn005969	0.084321	0.084298	1758
BMgn013770	0.084321	0.084298	1759
BMgn005501	0.084321	0.084298	1760
BMgn003301	0.08434	0.092361	1761
BMgn004783	0.084385	0.092403	1762
BMgn011212	0.084398	0.11414	1763
BMgn016073	0.084413	0.14163	1764
BMgn017056	0.084431	0.092447	1765
BMgn010062	0.084624	0.14398	1766
BMgn000668	0.084751	0.092756	1767
BMgn006018	0.084949	0.14245	1768
BMgn011732	0.085006	0.11462	1769
BMgn007996	0.085006	0.11462	1770
BMgn007514	0.085006	0.11462	1771
BMgn010593	0.085006	0.11462	1772
BMgn015731	0.085039	0.14258	1773
BMgn007741	0.085071	0.093036	1774
BMgn010589	0.085261	0.1429	1775
BMgn009184	0.085262	0.14291	1776
BMgn002006	0.085277	0.093221	1777
BMgn012994	0.085289	0.085245	1778
BMgn001211	0.085441	0.14317	1779
BMgn003218	0.085528	0.093456	1780
BMgn002795	0.08558	0.11505	1781
BMgn007895	0.085624	0.14548	1782
BMgn016959	0.085677	0.14557	1783
BMgn013384	0.085783	0.1152	1784
BMgn003711	0.085894	0.093785	1785
BMgn007986	0.085898	0.14384	1786
BMgn016623	0.085962	0.093846	1787
BMgn009524	0.085985	0.11538	1788
BMgn000521	0.086022	0.14404	1789
BMgn011016	0.086087	0.11546	1790
BMgn001581	0.086087	0.11546	1791
BMgn003652	0.086168	0.094024	1792
BMgn015335	0.086201	0.14432	1793
BMgn003860	0.086214	0.094063	1794
BMgn007563	0.086282	0.09413	1795
BMgn002502	0.086305	0.086282	1796
BMgn016634	0.08666	0.1159	1797
BMgn005956	0.086728	0.11595	1798
BMgn000903	0.086854	0.086813	1799
BMgn001162	0.086863	0.11604	1800
BMgn016560	0.086871	0.14532	1801
BMgn006194	0.086871	0.14532	1802
BMgn004043	0.087013	0.094795	1803
BMgn004045	0.087013	0.094795	1804
BMgn015805	0.087013	0.094795	1805
BMgn011357	0.087013	0.094795	1806
BMgn012272	0.087013	0.094795	1807
BMgn016116	0.087013	0.094795	1808
BMgn009495	0.087021	0.15289	1809
BMgn016260	0.087099	0.11623	1810
BMgn000852	0.087141	0.087103	1811
BMgn010348	0.087237	0.0872	1812
BMgn014234	0.08735	0.14604	1813
BMgn011893	0.087407	0.14611	1814
BMgn005817	0.087514	0.14818	1815
BMgn016014	0.087678	0.14652	1816
BMgn017547	0.087719	0.14658	1817
BMgn010279	0.087903	0.095634	1818
BMgn010531	0.087942	0.11691	1819
BMgn008424	0.087942	0.11691	1820
BMgn014482	0.087942	0.11691	1821
BMgn012374	0.08804	0.095753	1822
BMgn004776	0.088086	0.095795	1823
BMgn006514	0.088211	0.14919	1824
BMgn014962	0.088432	0.14767	1825
BMgn014599	0.088509	0.14779	1826
BMgn004786	0.088565	0.096248	1827
BMgn013519	0.088611	0.14794	1828
BMgn009149	0.08877	0.09644	1829
BMgn016453	0.088786	0.15002	1830
BMgn014077	0.088789	0.14821	1831
BMgn000469	0.088818	0.11759	1832
BMgn009755	0.088862	0.09652	1833
BMgn010026	0.088883	0.14835	1834
BMgn000456	0.08909	0.096718	1835
BMgn008569	0.089123	0.15052	1836
BMgn013745	0.089135	0.096764	1837
BMgn005667	0.089155	0.11785	1838
BMgn000678	0.089204	0.096831	1839
BMgn002200	0.089272	0.09689	1840
BMgn008386	0.089357	0.11801	1841
BMgn012525	0.089357	0.11801	1842
BMgn008924	0.089435	0.08942	1843
BMgn015179	0.089457	0.14875	1844
BMgn003026	0.089523	0.097145	1845
BMgn016329	0.089593	0.1182	1846
BMgn017117	0.089683	0.097292	1847
BMgn002965	0.089698	0.089685	1848
BMgn001917	0.089819	0.097413	1849
BMgn012478	0.089865	0.097451	1850
BMgn012811	0.090287	0.1522	1851
BMgn017094	0.090482	0.14944	1852
BMgn009127	0.090777	0.098309	1853
BMgn004723	0.090777	0.098309	1854
BMgn008457	0.090777	0.098309	1855
BMgn009596	0.090777	0.098309	1856
BMgn003475	0.090777	0.098309	1857
BMgn008421	0.090777	0.098309	1858
BMgn011393	0.090777	0.098309	1859
BMgn002620	0.090893	0.09091	1860
BMgn009462	0.090973	0.1193	1861
BMgn013305	0.091036	0.091046	1862
BMgn010737	0.09104	0.11935	1863
BMgn002675	0.091175	0.11945	1864
BMgn010352	0.091175	0.11945	1865
BMgn010680	0.091175	0.11945	1866
BMgn013105	0.091194	0.14994	1867
BMgn005693	0.091347	0.091361	1868
BMgn016721	0.09146	0.098929	1869
BMgn007945	0.091688	0.09912	1870
BMgn004748	0.091837	0.15438	1871
BMgn009810	0.091837	0.15438	1872
BMgn013909	0.09187	0.099294	1873
BMgn015830	0.091896	0.091891	1874
BMgn010992	0.091905	0.15041	1875
BMgn003889	0.091914	0.12002	1876
BMgn005080	0.091914	0.12002	1877
BMgn007254	0.091914	0.12002	1878
BMgn000290	0.091914	0.12002	1879
BMgn012114	0.092098	0.099503	1880
BMgn007102	0.092234	0.099623	1881
BMgn003246	0.092439	0.15078	1882
BMgn001492	0.092508	0.099882	1883
BMgn006340	0.092599	0.099957	1884
BMgn006716	0.09262	0.12059	1885
BMgn011337	0.092633	0.16038	1886
BMgn007367	0.092804	0.10015	1887
BMgn013652	0.092887	0.15588	1888
BMgn013542	0.092972	0.15117	1889
BMgn000515	0.092972	0.092952	1890
BMgn010541	0.092972	0.092952	1891
BMgn011507	0.092972	0.092952	1892
BMgn010946	0.093149	0.15128	1893
BMgn013632	0.093325	0.12115	1894
BMgn012147	0.093555	0.10085	1895
BMgn000471	0.093695	0.12145	1896
BMgn014619	0.093784	0.093765	1897
BMgn011921	0.093832	0.093802	1898
BMgn013715	0.093976	0.09395	1899
BMgn005001	0.093993	0.15187	1900
BMgn005736	0.093993	0.15187	1901
BMgn000337	0.094123	0.10138	1902
BMgn008142	0.094123	0.10138	1903
BMgn007613	0.094123	0.10138	1904
BMgn001323	0.094123	0.10138	1905
BMgn010579	0.094123	0.10138	1906
BMgn008838	0.094123	0.10138	1907
BMgn010770	0.094123	0.10138	1908
BMgn010838	0.094123	0.10138	1909
BMgn005459	0.094179	0.094166	1910
BMgn012437	0.094232	0.12186	1911
BMgn013014	0.094332	0.12193	1912
BMgn002303	0.094634	0.12216	1913
BMgn000951	0.094692	0.1019	1914
BMgn016939	0.09481	0.15862	1915
BMgn010120	0.094919	0.1021	1916
BMgn001135	0.094919	0.1021	1917
BMgn003563	0.094919	0.1021	1918
BMgn001321	0.094931	0.094918	1919
BMgn005685	0.094991	0.094976	1920
BMgn003758	0.095147	0.10231	1921
BMgn017264	0.095271	0.15933	1922
BMgn015763	0.095306	0.10247	1923
BMgn006348	0.095316	0.15939	1924
BMgn003021	0.095339	0.12271	1925
BMgn015589	0.095339	0.12271	1926
BMgn005773	0.095339	0.12271	1927
BMgn012976	0.095339	0.12271	1928
BMgn016002	0.095339	0.12271	1929
BMgn004088	0.095339	0.12271	1930
BMgn006902	0.095339	0.12271	1931
BMgn014948	0.095339	0.12271	1932
BMgn003665	0.095505	0.095476	1933
BMgn000909	0.095935	0.095893	1934
BMgn004832	0.096121	0.16056	1935
BMgn008726	0.096143	0.12338	1936
BMgn006640	0.096237	0.10327	1937
BMgn014654	0.096344	0.12354	1938
BMgn015376	0.096419	0.10344	1939
BMgn013503	0.096461	0.096433	1940
BMgn001371	0.096464	0.10347	1941
BMgn001269	0.096478	0.12364	1942
BMgn006266	0.096653	0.15371	1943
BMgn003280	0.096713	0.12383	1944
BMgn006623	0.096713	0.12383	1945
BMgn008389	0.096748	0.096715	1946
BMgn015654	0.096828	0.1038	1947
BMgn008936	0.096843	0.096802	1948
BMgn014676	0.096867	0.096828	1949
BMgn010969	0.096873	0.10384	1950
BMgn005794	0.09688	0.12395	1951
BMgn007980	0.097368	0.16676	1952
BMgn004955	0.097406	0.15424	1953
BMgn014259	0.097416	0.12437	1954
BMgn011863	0.097417	0.097366	1955
BMgn000152	0.097417	0.097366	1956
BMgn014766	0.097417	0.097366	1957
BMgn006772	0.097417	0.097366	1958
BMgn006841	0.097417	0.097366	1959
BMgn010482	0.097417	0.097366	1960
BMgn008048	0.097417	0.097366	1961
BMgn008122	0.09763	0.16269	1962
BMgn012991	0.09763	0.16269	1963
BMgn011854	0.097679	0.16277	1964
BMgn006240	0.097835	0.097771	1965
BMgn009685	0.097883	0.097825	1966
BMgn006528	0.097884	0.12474	1967
BMgn001724	0.097937	0.1546	1968
BMgn015746	0.098054	0.10493	1969
BMgn001892	0.098054	0.10493	1970
BMgn015405	0.098054	0.10493	1971
BMgn011170	0.098291	0.15484	1972
BMgn009498	0.098388	0.16381	1973
BMgn010781	0.098444	0.098383	1974
BMgn011888	0.098687	0.12541	1975
BMgn000811	0.098687	0.12541	1976
BMgn003002	0.098687	0.12541	1977
BMgn015227	0.098687	0.12541	1978
BMgn005613	0.098731	0.098707	1979
BMgn004775	0.099335	0.16519	1980
BMgn009499	0.09936	0.16523	1981
BMgn017416	0.099423	0.126	1982
BMgn005257	0.099544	0.099547	1983
BMgn004426	0.099664	0.16569	1984
BMgn000582	0.099687	0.10645	1985
BMgn001123	0.099778	0.10653	1986
BMgn002712	0.099783	0.099779	1987
BMgn013465	0.099793	0.15589	1988
BMgn011055	0.099793	0.15589	1989
BMgn006268	0.099884	0.16603	1990
BMgn013954	0.10002	0.12648	1991
BMgn003558	0.10012	0.10011	1992
BMgn013213	0.10018	0.16645	1993
BMgn009793	0.10019	0.10688	1994
BMgn015788	0.10041	0.10709	1995
BMgn009935	0.10047	0.17089	1996
BMgn001142	0.10073	0.12705	1997
BMgn010474	0.10076	0.15654	1998
BMgn012427	0.10083	0.12713	1999
[truncated: 13,796 more rows]

## Sheet: sgRNA score in 4 ℃
sgRNA ID	Gene ID	score
gRNA_90436	BMgn016971	30.485
gRNA_48213	BMgn009430	30.22
gRNA_65541	BMgn012554	30.105
gRNA_3912	BMgn000849	28.21
gRNA_42353	BMgn008369	26.788
gRNA_68975	BMgn013180	26.788
gRNA_85043	BMgn016033	26.674
gRNA_41989	BMgn008304	26.598
gRNA_18494	BMgn003995	25.081
gRNA_12207	BMgn002644	24.491
gRNA_45039	BMgn008851	22.712
gRNA_34645	BMgn006986	22.712
gRNA_38084	BMgn007603	22.048
gRNA_4145	BMgn000898	21.732
gRNA_7149	BMgn001547	21.554
gRNA_48410	BMgn009463	21.385
gRNA_31887	BMgn006495	21.29
gRNA_70409	BMgn013433	20.816
gRNA_55090	BMgn010668	20.816
gRNA_8160	BMgn001766	20.626
gRNA_34967	BMgn007044	20.626
gRNA_68437	BMgn013084	20.437
gRNA_61379	BMgn011801	20.316
gRNA_67995	BMgn013000	20.093
gRNA_22335	BMgn004754	20.015
gRNA_26857	BMgn005570	19.963
gRNA_68159	BMgn013027	19.868
gRNA_34256	BMgn006919	19.489
gRNA_15565	BMgn003362	19.394
gRNA_65599	BMgn012564	19.394
gRNA_83329	BMgn015737	18.257
gRNA_7987	BMgn001728	18.241
gRNA_35071	BMgn007064	18.115
gRNA_46274	BMgn009070	18.067
gRNA_84318	BMgn015906	17.877
gRNA_74057	BMgn014094	17.877
gRNA_12122	BMgn002627	17.791
gRNA_70319	BMgn013413	17.783
gRNA_52184	BMgn010154	17.498
gRNA_242	BMgn000056	17.41
gRNA_52547	BMgn010216	17.403
gRNA_27975	BMgn005774	17.403
gRNA_72736	BMgn013854	17.309
gRNA_13084	BMgn002829	17.309
gRNA_36767	BMgn007372	17.222
gRNA_39039	BMgn007773	17.214
gRNA_44420	BMgn008737	17.18
gRNA_70871	BMgn013511	17.145
gRNA_10222	BMgn002215	17.119
gRNA_75702	BMgn014414	17.098
gRNA_60373	BMgn011620	17.024
gRNA_18017	BMgn003892	16.994
gRNA_8433	BMgn001825	16.929
gRNA_20538	BMgn004422	16.74
gRNA_5094	BMgn001106	16.74
gRNA_50552	BMgn009845	16.55
gRNA_5703	BMgn001238	16.55
gRNA_8733	BMgn001887	16.535
gRNA_67262	BMgn012869	16.455
gRNA_29797	BMgn006103	16.455
gRNA_1854	BMgn000399	16.361
gRNA_41820	BMgn008275	16.266
gRNA_90455	BMgn016974	16.266
gRNA_4771	BMgn001035	16.167
gRNA_6966	BMgn001509	16.076
gRNA_5766	BMgn001252	16.076
gRNA_6977	BMgn001512	15.912
gRNA_21128	BMgn004531	15.792
gRNA_62949	BMgn012080	15.719
gRNA_15968	BMgn003446	15.697
gRNA_63912	BMgn012250	15.602
gRNA_80103	BMgn015186	15.413
gRNA_18806	BMgn004064	15.413
gRNA_30561	BMgn006245	15.274
gRNA_27132	BMgn005621	15.22
gRNA_61856	BMgn011887	15.117
gRNA_56126	BMgn010849	15.116
gRNA_26188	BMgn005451	15.034
gRNA_63636	BMgn012200	15.034
gRNA_22076	BMgn004706	14.939
gRNA_26860	BMgn005570	14.861
gRNA_56572	BMgn010931	14.85
gRNA_66512	BMgn012734	14.818
gRNA_41676	BMgn008251	14.764
gRNA_66856	BMgn012793	14.749
gRNA_13577	BMgn002931	14.749
gRNA_49196	BMgn009600	14.63
gRNA_67016	BMgn012828	14.465
gRNA_29440	BMgn006041	14.465
gRNA_43316	BMgn008542	14.465
gRNA_61201	BMgn011770	14.37
gRNA_43766	BMgn008624	14.37
gRNA_44045	BMgn008671	14.18
gRNA_32932	BMgn006680	14.151
gRNA_21186	BMgn004545	13.991
gRNA_41698	BMgn008254	13.938
gRNA_36768	BMgn007373	13.932
gRNA_48814	BMgn009534	13.849
gRNA_5012	BMgn001084	13.81
gRNA_82531	BMgn015601	13.801
gRNA_50611	BMgn009855	13.801
gRNA_50384	BMgn009814	13.801
gRNA_77497	BMgn014744	13.777
gRNA_86871	BMgn016349	13.708
gRNA_10799	BMgn002346	13.707
gRNA_50458	BMgn009826	13.662
gRNA_28794	BMgn005928	13.612
gRNA_54037	BMgn010487	13.612
gRNA_71773	BMgn013678	13.612
gRNA_66734	BMgn012772	13.542
gRNA_13744	BMgn002968	13.517
gRNA_44296	BMgn008714	13.517
gRNA_23026	BMgn004873	13.443
gRNA_55119	BMgn010673	13.42
gRNA_81351	BMgn015397	13.35
gRNA_50570	BMgn009848	13.327
gRNA_27206	BMgn005634	13.327
gRNA_54362	BMgn010542	13.327
gRNA_35836	BMgn007203	13.269
gRNA_76091	BMgn014483	13.264
gRNA_24258	BMgn005099	13.233
gRNA_60804	BMgn011697	13.233
gRNA_67976	BMgn012997	13.209
gRNA_8170	BMgn001768	13.176
gRNA_52042	BMgn010130	13.138
gRNA_78983	BMgn014996	13.043
gRNA_71472	BMgn013621	12.954
gRNA_20476	BMgn004412	12.948
gRNA_42913	BMgn008467	12.948
gRNA_68399	BMgn013077	12.853
gRNA_23638	BMgn004980	12.853
gRNA_37786	BMgn007549	12.853
gRNA_32671	BMgn006634	12.822
gRNA_23725	BMgn004994	12.759
gRNA_41833	BMgn008277	12.759
gRNA_48600	BMgn009497	12.682
gRNA_26051	BMgn005425	12.664
gRNA_39808	BMgn007909	12.653
gRNA_6356	BMgn001377	12.647
gRNA_37555	BMgn007510	12.58
gRNA_37295	BMgn007467	12.579
gRNA_89480	BMgn016805	12.569
gRNA_26313	BMgn005473	12.569
gRNA_23124	BMgn004892	12.569
gRNA_47428	BMgn009286	12.569
gRNA_84955	BMgn016019	12.506
gRNA_18980	BMgn004102	12.474
gRNA_61761	BMgn011870	12.474
gRNA_24305	BMgn005108	12.474
gRNA_31479	BMgn006414	12.379
gRNA_52362	BMgn010184	12.379
gRNA_50316	BMgn009801	12.379
gRNA_80641	BMgn015278	12.379
gRNA_57309	BMgn011061	12.379
gRNA_50934	BMgn009919	12.379
gRNA_49787	BMgn009708	12.285
gRNA_93724	BMgn017542	12.285
gRNA_39997	BMgn007942	12.285
gRNA_42318	BMgn008363	12.25
gRNA_39630	BMgn007878	12.19
gRNA_10198	BMgn002209	12.19
gRNA_9017	BMgn001950	12.095
gRNA_83751	BMgn015810	12.095
gRNA_31849	BMgn006489	12.067
gRNA_78916	BMgn014984	12
gRNA_292	BMgn000066	12
gRNA_31146	BMgn006352	11.966
gRNA_41232	BMgn008161	11.944
gRNA_50600	BMgn009854	11.906
gRNA_26310	BMgn005473	11.906
gRNA_74282	BMgn014135	11.906
gRNA_68122	BMgn013021	11.861
gRNA_26001	BMgn005416	11.752
gRNA_29959	BMgn006134	11.716
gRNA_18440	BMgn003985	11.716
gRNA_58985	BMgn011370	11.716
gRNA_48357	BMgn009454	11.716
gRNA_1780	BMgn000383	11.716
gRNA_14464	BMgn003126	11.676
gRNA_28	BMgn000006	11.667
gRNA_40180	BMgn007974	11.629
gRNA_35225	BMgn007090	11.621
gRNA_64340	BMgn012328	11.621
gRNA_80606	BMgn015271	11.621
gRNA_74738	BMgn014225	11.621
gRNA_14259	BMgn003081	11.614
gRNA_39113	BMgn007785	11.556
gRNA_50287	BMgn009795	11.554
gRNA_53139	BMgn010325	11.544
gRNA_24197	BMgn005085	11.526
gRNA_60295	BMgn011606	11.526
gRNA_19374	BMgn004193	11.526
gRNA_33788	BMgn006834	11.454
gRNA_5548	BMgn001205	11.432
gRNA_85601	BMgn016130	11.432
gRNA_77198	BMgn014691	11.432
gRNA_5238	BMgn001137	11.426
gRNA_5615	BMgn001219	11.337
gRNA_64534	BMgn012365	11.337
gRNA_69091	BMgn013200	11.337
gRNA_16751	BMgn003615	11.337
gRNA_50513	BMgn009835	11.337
gRNA_70038	BMgn013365	11.316
gRNA_47292	BMgn009262	11.288
gRNA_79837	BMgn015141	11.242
gRNA_42021	BMgn008310	11.242
gRNA_27272	BMgn005646	11.238
gRNA_10730	BMgn002332	11.196
gRNA_86756	BMgn016330	11.178
gRNA_52197	BMgn010156	11.169
gRNA_92333	BMgn017299	11.155
gRNA_93761	BMgn017548	11.147
gRNA_18477	BMgn003992	11.147
gRNA_30804	BMgn006290	11.147
gRNA_8484	BMgn001835	11.147
gRNA_25872	BMgn005393	11.147
gRNA_76537	BMgn014565	11.147
gRNA_52536	BMgn010214	11.147
gRNA_2040	BMgn000440	11.122
gRNA_42570	BMgn008406	11.059
gRNA_89153	BMgn016747	11.052
gRNA_6877	BMgn001491	11.001
gRNA_79276	BMgn015045	10.971
gRNA_46834	BMgn009170	10.958
gRNA_14740	BMgn003186	10.958
gRNA_80909	BMgn015323	10.943
gRNA_31009	BMgn006327	10.908
gRNA_89115	BMgn016741	10.882
gRNA_15310	BMgn003309	10.863
gRNA_6537	BMgn001416	10.781
gRNA_47969	BMgn009384	10.768
gRNA_90924	BMgn017055	10.768
gRNA_27088	BMgn005611	10.768
gRNA_26987	BMgn005591	10.768
gRNA_19735	BMgn004273	10.768
gRNA_1203	BMgn000264	10.743
gRNA_33584	BMgn006799	10.673
gRNA_1963	BMgn000424	10.673
gRNA_31750	BMgn006470	10.673
gRNA_54478	BMgn010562	10.673
gRNA_44804	BMgn008810	10.633
gRNA_10247	BMgn002220	10.584
gRNA_7828	BMgn001694	10.578
gRNA_50335	BMgn009804	10.578
gRNA_32145	BMgn006539	10.578
gRNA_65148	BMgn012481	10.578
gRNA_16614	BMgn003583	10.578
gRNA_57473	BMgn011089	10.578
gRNA_58342	BMgn011255	10.577
gRNA_40172	BMgn007973	10.577
gRNA_15817	BMgn003414	10.53
gRNA_71771	BMgn013678	10.528
gRNA_31690	BMgn006459	10.514
gRNA_28807	BMgn005930	10.484
gRNA_69267	BMgn013230	10.484
gRNA_85131	BMgn016049	10.484
gRNA_65594	BMgn012564	10.484
gRNA_17963	BMgn003879	10.484
gRNA_27959	BMgn005771	10.412
gRNA_33339	BMgn006754	10.389
gRNA_74043	BMgn014092	10.389
gRNA_17661	BMgn003806	10.347
gRNA_92066	BMgn017254	10.333
gRNA_3131	BMgn000681	10.325
gRNA_70528	BMgn013453	10.294
gRNA_75633	BMgn014403	10.294
gRNA_84909	BMgn016010	10.294
gRNA_90215	BMgn016930	10.294
gRNA_55567	BMgn010751	10.199
gRNA_16749	BMgn003615	10.162
gRNA_39465	BMgn007847	10.153
gRNA_56430	BMgn010906	10.104
gRNA_81302	BMgn015389	10.104
gRNA_49537	BMgn009662	10.104
gRNA_51232	BMgn009980	10.104
gRNA_38276	BMgn007635	10.104
gRNA_64570	BMgn012371	10.089
gRNA_5912	BMgn001283	10.082
gRNA_7095	BMgn001536	10.01
gRNA_58612	BMgn011302	10.01
gRNA_59605	BMgn011481	10.01
gRNA_55094	BMgn010668	10.01
gRNA_36796	BMgn007377	10.01
gRNA_22695	BMgn004815	10.01
gRNA_57617	BMgn011116	9.9997
gRNA_30971	BMgn006321	9.9422
gRNA_46258	BMgn009066	9.939
gRNA_49409	BMgn009639	9.9149
gRNA_52612	BMgn010227	9.9149
gRNA_50425	BMgn009820	9.9149
gRNA_458	BMgn000103	9.9149
gRNA_37037	BMgn007423	9.9149
gRNA_25293	BMgn005288	9.9149
gRNA_83807	BMgn015820	9.9149
gRNA_17083	BMgn003685	9.9123
gRNA_15445	BMgn003337	9.8757
gRNA_36581	BMgn007334	9.8201
gRNA_39455	BMgn007845	9.8201
gRNA_4119	BMgn000892	9.8201
gRNA_11664	BMgn002530	9.8115
gRNA_88257	BMgn016590	9.7818
gRNA_64868	BMgn012423	9.7359
gRNA_83692	BMgn015800	9.7253
gRNA_51011	BMgn009936	9.7253
gRNA_882	BMgn000195	9.6512
gRNA_16812	BMgn003627	9.6305
gRNA_33476	BMgn006779	9.6305
gRNA_55183	BMgn010684	9.6305
gRNA_27670	BMgn005721	9.6305
gRNA_20817	BMgn004474	9.6305
gRNA_22334	BMgn004754	9.6056
gRNA_12896	BMgn002789	9.5357
gRNA_14739	BMgn003186	9.5357
gRNA_46791	BMgn009161	9.5357
gRNA_64689	BMgn012391	9.5357
gRNA_85304	BMgn016080	9.5045
gRNA_59209	BMgn011413	9.452
gRNA_24593	BMgn005161	9.4409
gRNA_2355	BMgn000507	9.4409
gRNA_63648	BMgn012202	9.4409
gRNA_87118	BMgn016394	9.4409
gRNA_50760	BMgn009885	9.4409
gRNA_14698	BMgn003178	9.4409
gRNA_50745	BMgn009883	9.4409
gRNA_92060	BMgn017253	9.4112
gRNA_29352	BMgn006026	9.408
gRNA_75102	BMgn014294	9.4046
gRNA_74215	BMgn014123	9.4046
gRNA_53185	BMgn010334	9.3845
gRNA_34851	BMgn007023	9.3461
gRNA_88735	BMgn016674	9.3461
gRNA_37553	BMgn007510	9.3461
gRNA_93696	BMgn017538	9.3461
gRNA_85843	BMgn016171	9.3056
gRNA_2121	BMgn000457	9.2949
gRNA_26809	BMgn005562	9.2513
gRNA_46838	BMgn009170	9.2513
gRNA_15734	BMgn003397	9.2513
gRNA_72072	BMgn013728	9.2513
gRNA_9998	BMgn002164	9.2513
gRNA_71134	BMgn013557	9.2293
gRNA_10968	BMgn002381	9.2067
gRNA_55279	BMgn010702	9.1841
gRNA_22403	BMgn004765	9.1833
gRNA_83396	BMgn015749	9.1563
gRNA_19945	BMgn004315	9.1395
gRNA_61249	BMgn011778	9.1011
gRNA_29981	BMgn006140	9.0895
gRNA_40476	BMgn008027	9.068
gRNA_87467	BMgn016454	9.0618
gRNA_65510	BMgn012544	9.0562
gRNA_83969	BMgn015847	8.967
gRNA_76197	BMgn014507	8.967
gRNA_69000	BMgn013184	8.967
gRNA_56566	BMgn010930	8.967
gRNA_66675	BMgn012762	8.967
gRNA_93493	BMgn017500	8.967
gRNA_65627	BMgn012570	8.967
gRNA_65537	BMgn012553	8.967
gRNA_77373	BMgn014722	8.9657
gRNA_22292	BMgn004747	8.9606
gRNA_5085	BMgn001103	8.9187
gRNA_2142	BMgn000462	8.9166
gRNA_31701	BMgn006461	8.889
gRNA_54834	BMgn010625	8.8722
gRNA_16942	BMgn003655	8.8722
gRNA_84900	BMgn016009	8.8722
gRNA_48063	BMgn009400	8.8722
gRNA_35402	BMgn007119	8.8722
gRNA_11842	BMgn002567	8.8722
gRNA_6258	BMgn001358	8.8722
gRNA_25803	BMgn005380	8.8277
gRNA_27987	BMgn005776	8.7935
gRNA_71342	BMgn013596	8.7924
gRNA_74467	BMgn014174	8.7924
gRNA_3362	BMgn000728	8.7894
gRNA_88073	BMgn016559	8.7825
gRNA_44154	BMgn008689	8.7792
gRNA_70336	BMgn013420	8.7774
gRNA_87769	BMgn016505	8.6969
gRNA_62560	BMgn012012	8.6826
gRNA_89070	BMgn016733	8.6826
gRNA_57700	BMgn011131	8.6826
gRNA_375	BMgn000083	8.6826
gRNA_93458	BMgn017493	8.6792
gRNA_8596	BMgn001858	8.6411
gRNA_4155	BMgn000900	8.6408
gRNA_43551	BMgn008586	8.6401
gRNA_14772	BMgn003195	8.6099
gRNA_32432	BMgn006590	8.5945
gRNA_13369	BMgn002889	8.5878
gRNA_62909	BMgn012073	8.5878
gRNA_64735	BMgn012400	8.5141
gRNA_83736	BMgn015807	8.493
gRNA_39857	BMgn007918	8.493
gRNA_23951	BMgn005040	8.493
gRNA_22498	BMgn004782	8.493
gRNA_93791	BMgn017553	8.493
gRNA_70016	BMgn013361	8.3992
gRNA_61481	BMgn011819	8.3982
gRNA_61334	BMgn011793	8.3982
gRNA_67663	BMgn012940	8.3982
gRNA_50761	BMgn009885	8.3982
gRNA_48034	BMgn009395	8.3982
gRNA_13030	BMgn002818	8.3982
gRNA_25167	BMgn005267	8.3982
gRNA_2120	BMgn000457	8.3982
gRNA_7515	BMgn001628	8.3966
gRNA_68721	BMgn013134	8.3737
gRNA_78114	BMgn014848	8.3635
gRNA_48345	BMgn009452	8.3491
gRNA_63080	BMgn012102	8.3484
gRNA_43917	BMgn008649	8.3447
gRNA_84958	BMgn016019	8.3163
gRNA_56467	BMgn010912	8.3039
gRNA_28236	BMgn005824	8.3034
gRNA_59228	BMgn011416	8.3034
gRNA_17413	BMgn003754	8.3034
gRNA_91118	BMgn017088	8.3034
gRNA_62018	BMgn011914	8.3034
gRNA_62964	BMgn012082	8.3034
gRNA_452	BMgn000102	8.2976
gRNA_34957	BMgn007042	8.2573
gRNA_53500	BMgn010391	8.256
gRNA_41828	BMgn008276	8.2247
gRNA_2201	BMgn000473	8.2247
gRNA_31964	BMgn006508	8.2247
gRNA_56772	BMgn010964	8.2086
gRNA_83278	BMgn015729	8.2086
gRNA_462	BMgn000104	8.2086
gRNA_17892	BMgn003861	8.2086
gRNA_49991	BMgn009743	8.2086
gRNA_19107	BMgn004130	8.2086
gRNA_77318	BMgn014712	8.1987
gRNA_50393	BMgn009815	8.181
gRNA_83071	BMgn015693	8.174
gRNA_17662	BMgn003806	8.1359
gRNA_73901	BMgn014066	8.1264
gRNA_26930	BMgn005582	8.1152
gRNA_69695	BMgn013304	8.1139
gRNA_25292	BMgn005288	8.1139
gRNA_49518	BMgn009659	8.1019
gRNA_45222	BMgn008881	8.0851
gRNA_91911	BMgn017227	8.0649
gRNA_23453	BMgn004949	8.059
gRNA_72290	BMgn013772	8.0376
gRNA_15453	BMgn003339	8.027
gRNA_83732	BMgn015807	8.0191
gRNA_81648	BMgn015449	8.0191
gRNA_50593	BMgn009851	8.0191
gRNA_37369	BMgn007479	8.0191
gRNA_1487	BMgn000323	8.0191
gRNA_22063	BMgn004703	8.0191
gRNA_69899	BMgn013340	8.0191
gRNA_42518	BMgn008396	8.0191
gRNA_8213	BMgn001777	8.0191
gRNA_62202	BMgn011948	8.0189
gRNA_93217	BMgn017451	8.0182
gRNA_51960	BMgn010117	8.0063
gRNA_61361	BMgn011798	7.9243
gRNA_25732	BMgn005367	7.9243
gRNA_74000	BMgn014084	7.9216
gRNA_52333	BMgn010179	7.9216
gRNA_28096	BMgn005798	7.9216
gRNA_71039	BMgn013540	7.9102
gRNA_17877	BMgn003857	7.8911
gRNA_72984	BMgn013897	7.8836
gRNA_90249	BMgn016937	7.8817
gRNA_60346	BMgn011615	7.8809
gRNA_43296	BMgn008538	7.8777
gRNA_32591	BMgn006621	7.8688
gRNA_33176	BMgn006726	7.8615
gRNA_71085	BMgn013548	7.8539
gRNA_55241	BMgn010695	7.8316
gRNA_30128	BMgn006166	7.8295
gRNA_43675	BMgn008608	7.8295
gRNA_92266	BMgn017287	7.8295
gRNA_52166	BMgn010151	7.8287
gRNA_37765	BMgn007545	7.817
gRNA_22099	BMgn004711	7.8043
gRNA_89536	BMgn016814	7.8008
gRNA_84583	BMgn015954	7.7379
gRNA_86099	BMgn016215	7.7347
gRNA_4168	BMgn000905	7.7347
gRNA_29452	BMgn006044	7.7347
gRNA_34077	BMgn006886	7.7347
gRNA_39810	BMgn007909	7.7325
gRNA_69700	BMgn013304	7.7038
gRNA_52568	BMgn010220	7.684
gRNA_56555	BMgn010928	7.6826
gRNA_55962	BMgn010820	7.6813
gRNA_34615	BMgn006981	7.6738
gRNA_72690	BMgn013846	7.6559
gRNA_47053	BMgn009213	7.6499
gRNA_33067	BMgn006706	7.6399
gRNA_86727	BMgn016325	7.6399
gRNA_80973	BMgn015334	7.6399
gRNA_14273	BMgn003084	7.6399
gRNA_10363	BMgn002244	7.6399
gRNA_47817	BMgn009356	7.6399
gRNA_38333	BMgn007645	7.6262
gRNA_71063	BMgn013544	7.6212
gRNA_36857	BMgn007388	7.5998
gRNA_26921	BMgn005580	7.567
gRNA_54648	BMgn010592	7.5451
gRNA_78914	BMgn014984	7.5451
gRNA_35621	BMgn007162	7.5451
gRNA_16076	BMgn003469	7.5451
gRNA_68160	BMgn013027	7.5451
gRNA_33793	BMgn006835	7.5451
gRNA_24504	BMgn005145	7.5451
gRNA_14630	BMgn003161	7.5451
gRNA_91874	BMgn017221	7.5308
gRNA_62504	BMgn012003	7.5308
gRNA_73207	BMgn013934	7.5222
gRNA_51701	BMgn010068	7.5189
gRNA_41917	BMgn008291	7.4882
gRNA_72080	BMgn013729	7.4647
gRNA_89067	BMgn016733	7.4638
gRNA_85615	BMgn016133	7.4516
gRNA_22948	BMgn004860	7.4516
gRNA_13451	BMgn002905	7.4516
gRNA_36483	BMgn007317	7.4503
gRNA_7716	BMgn001670	7.4503
gRNA_78724	BMgn014951	7.4503
gRNA_37353	BMgn007477	7.4503
gRNA_85959	BMgn016190	7.4503
gRNA_22748	BMgn004824	7.4503
gRNA_60259	BMgn011600	7.4503
gRNA_62967	BMgn012083	7.4503
gRNA_66097	BMgn012651	7.4503
gRNA_29065	BMgn005976	7.4503
gRNA_9960	BMgn002153	7.4503
gRNA_78698	BMgn014946	7.4446
gRNA_81999	BMgn015510	7.4426
gRNA_17174	BMgn003704	7.4357
gRNA_11349	BMgn002461	7.4301
gRNA_81478	BMgn015419	7.4236
gRNA_30363	BMgn006209	7.4236
gRNA_57258	BMgn011049	7.4236
gRNA_41859	BMgn008281	7.4181
gRNA_29235	BMgn006007	7.4015
gRNA_39338	BMgn007824	7.3904
gRNA_90418	BMgn016967	7.3607
gRNA_43953	BMgn008655	7.3587
gRNA_91531	BMgn017161	7.3555
gRNA_14773	BMgn003195	7.3555
gRNA_25392	BMgn005306	7.3555
gRNA_21543	BMgn004612	7.3555
gRNA_15730	BMgn003396	7.3555
gRNA_49343	BMgn009627	7.3555
gRNA_71470	BMgn013621	7.3555
gRNA_49420	BMgn009641	7.3555
gRNA_15247	BMgn003296	7.3555
gRNA_52271	BMgn010169	7.3555
gRNA_18382	BMgn003973	7.3555
gRNA_17962	BMgn003879	7.3555
gRNA_53359	BMgn010366	7.3555
gRNA_53924	BMgn010467	7.3544
gRNA_8354	BMgn001806	7.344
gRNA_39026	BMgn007771	7.3411
gRNA_9323	BMgn002015	7.3336
gRNA_52502	BMgn010207	7.3224
gRNA_86667	BMgn016314	7.3224
gRNA_72817	BMgn013868	7.3224
gRNA_78125	BMgn014850	7.312
gRNA_90575	BMgn016995	7.2894
gRNA_59991	BMgn011553	7.2852
gRNA_25188	BMgn005270	7.2784
gRNA_6774	BMgn001471	7.2607
gRNA_25205	BMgn005273	7.2607
gRNA_20520	BMgn004419	7.2607
gRNA_77098	BMgn014674	7.2607
gRNA_75419	BMgn014363	7.2607
gRNA_22493	BMgn004781	7.2607
gRNA_56174	BMgn010857	7.2607
gRNA_27548	BMgn005698	7.2607
gRNA_62678	BMgn012032	7.2607
gRNA_19252	BMgn004165	7.2607
gRNA_15292	BMgn003306	7.2607
gRNA_39116	BMgn007786	7.2427
gRNA_48325	BMgn009449	7.2426
gRNA_85642	BMgn016137	7.2376
gRNA_42657	BMgn008422	7.1966
gRNA_6458	BMgn001400	7.1936
gRNA_11786	BMgn002556	7.1916
gRNA_10122	BMgn002193	7.178
gRNA_15995	BMgn003451	7.1659
gRNA_88042	BMgn016554	7.1659
gRNA_10958	BMgn002379	7.1659
gRNA_83562	BMgn015778	7.1659
gRNA_93897	BMgn017576	7.1659
gRNA_83745	BMgn015809	7.1092
gRNA_39979	BMgn007939	7.1092
gRNA_41314	BMgn008176	7.0953
gRNA_39632	BMgn007879	7.0898
gRNA_23204	BMgn004905	7.0898
gRNA_2254	BMgn000484	7.0853
gRNA_92315	BMgn017296	7.0805
gRNA_66858	BMgn012793	7.0712
gRNA_51729	BMgn010074	7.0712
gRNA_23390	BMgn004938	7.0712
gRNA_31084	BMgn006341	7.0712
gRNA_17281	BMgn003726	7.0712
gRNA_35476	BMgn007136	7.0712
gRNA_83877	BMgn015831	7.0712
gRNA_91563	BMgn017167	7.0712
gRNA_89754	BMgn016852	7.0463
gRNA_38810	BMgn007728	7.0286
gRNA_24842	BMgn005210	7.0157
gRNA_6005	BMgn001302	7.0113
gRNA_71107	BMgn013552	7.0045
gRNA_43833	BMgn008635	7.0016
gRNA_6133	BMgn001331	6.9926
gRNA_21849	BMgn004667	6.9764
gRNA_1130	BMgn000249	6.9764
gRNA_18837	BMgn004070	6.9764
gRNA_39452	BMgn007845	6.9764
gRNA_17604	BMgn003795	6.9764
gRNA_59777	BMgn011513	6.9764
gRNA_46869	BMgn009178	6.9764
gRNA_1346	BMgn000294	6.9764
gRNA_19419	BMgn004203	6.9764
gRNA_11415	BMgn002477	6.9764
gRNA_32006	BMgn006515	6.9764
gRNA_22896	BMgn004851	6.9596
gRNA_4993	BMgn001080	6.9506
gRNA_60359	BMgn011618	6.946
gRNA_4163	BMgn000904	6.9432
gRNA_31432	BMgn006405	6.9398
gRNA_19555	BMgn004231	6.9252
gRNA_85446	BMgn016104	6.916
gRNA_8203	BMgn001775	6.9134
gRNA_42297	BMgn008359	6.8969
gRNA_24390	BMgn005126	6.8816
gRNA_64861	BMgn012422	6.8816
gRNA_84139	BMgn015876	6.8816
gRNA_88240	BMgn016587	6.8816
gRNA_73016	BMgn013902	6.8816
gRNA_23767	BMgn005002	6.8816
gRNA_84995	BMgn016025	6.8816
gRNA_50557	BMgn009845	6.8816
gRNA_68138	BMgn013024	6.8816
gRNA_55835	BMgn010797	6.8816
gRNA_89437	BMgn016796	6.8816
gRNA_59337	BMgn011435	6.8702
gRNA_9748	BMgn002107	6.8655
gRNA_2248	BMgn000483	6.8635
gRNA_66936	BMgn012809	6.8595
gRNA_77328	BMgn014714	6.8595
gRNA_69033	BMgn013190	6.8372
gRNA_45633	BMgn008952	6.8345
gRNA_35045	BMgn007060	6.8345
gRNA_85186	BMgn016058	6.8345
gRNA_62366	BMgn011978	6.8335
gRNA_29589	BMgn006068	6.8064
gRNA_70979	BMgn013530	6.8064
gRNA_20655	BMgn004446	6.7999
gRNA_40835	BMgn008091	6.7916
gRNA_57868	BMgn011165	6.7868
gRNA_75342	BMgn014343	6.7868
gRNA_32476	BMgn006601	6.7868
gRNA_11539	BMgn002505	6.7868
gRNA_44824	BMgn008813	6.781
gRNA_49457	BMgn009648	6.781
gRNA_54801	BMgn010619	6.7801
gRNA_78136	BMgn014851	6.7703
gRNA_66988	BMgn012821	6.7668
gRNA_62484	BMgn011998	6.7568
gRNA_29701	BMgn006087	6.7227
gRNA_12265	BMgn002656	6.692
gRNA_41558	BMgn008230	6.692
gRNA_58799	BMgn011337	6.692
gRNA_66831	BMgn012789	6.692
gRNA_76282	BMgn014521	6.692
gRNA_68900	BMgn013166	6.6919
gRNA_69226	BMgn013223	6.6814
gRNA_59362	BMgn011439	6.6713
gRNA_17445	BMgn003760	6.669
gRNA_63213	BMgn012127	6.6686
gRNA_32850	BMgn006666	6.6686
gRNA_492	BMgn000110	6.6686
gRNA_14538	BMgn003143	6.6305
gRNA_6076	BMgn001317	6.6158
gRNA_34799	BMgn007014	6.6155
gRNA_30782	BMgn006287	6.6062
gRNA_50524	BMgn009837	6.6015
gRNA_79248	BMgn015040	6.5972
gRNA_79377	BMgn015063	6.5972
gRNA_63769	BMgn012224	6.5972
gRNA_52619	BMgn010228	6.5972
gRNA_28002	BMgn005780	6.5972
gRNA_32757	BMgn006649	6.5972
gRNA_17278	BMgn003726	6.5972
gRNA_8112	BMgn001755	6.5972
gRNA_63414	BMgn012163	6.5972
gRNA_66164	BMgn012663	6.594
gRNA_14168	BMgn003061	6.5911
gRNA_73523	BMgn013996	6.5896
gRNA_77850	BMgn014803	6.5823
gRNA_58349	BMgn011257	6.5814
gRNA_40916	BMgn008107	6.5725
gRNA_37486	BMgn007499	6.5691
gRNA_67635	BMgn012935	6.5605
gRNA_39468	BMgn007847	6.5442
gRNA_83433	BMgn015757	6.5409
gRNA_34316	BMgn006931	6.518
gRNA_12741	BMgn002755	6.5135
gRNA_91503	BMgn017157	6.507
gRNA_83111	BMgn015700	6.5062
gRNA_6749	BMgn001466	6.5024
gRNA_9189	BMgn001985	6.5024
gRNA_31714	BMgn006464	6.5024
gRNA_63900	BMgn012248	6.5024
gRNA_58635	BMgn011307	6.5024
gRNA_4813	BMgn001043	6.5024
gRNA_18833	BMgn004069	6.5024
gRNA_23264	BMgn004915	6.5024
gRNA_43033	BMgn008491	6.5024
gRNA_20189	BMgn004362	6.5024
gRNA_4174	BMgn000906	6.4931
gRNA_80121	BMgn015189	6.4931
gRNA_89649	BMgn016833	6.491
gRNA_5651	BMgn001228	6.4896
gRNA_4400	BMgn000955	6.4804
gRNA_91277	BMgn017115	6.4797
gRNA_17213	BMgn003712	6.4781
gRNA_18252	BMgn003943	6.4723
gRNA_15502	BMgn003350	6.4723
gRNA_76439	BMgn014548	6.4723
gRNA_44333	BMgn008720	6.4723
gRNA_72218	BMgn013759	6.4586
gRNA_51007	BMgn009935	6.4586
gRNA_51676	BMgn010062	6.4522
gRNA_89339	BMgn016779	6.4426
gRNA_84463	BMgn015933	6.4399
gRNA_64586	BMgn012373	6.4359
gRNA_55105	BMgn010670	6.4326
gRNA_42398	BMgn008376	6.426
gRNA_53894	BMgn010462	6.4202
gRNA_42987	BMgn008479	6.4106
gRNA_3693	BMgn000803	6.4076
gRNA_12971	BMgn002804	6.4076
gRNA_79407	BMgn015068	6.4076
gRNA_61877	BMgn011890	6.4076
gRNA_5207	BMgn001131	6.4076
gRNA_45441	BMgn008919	6.4076
gRNA_19174	BMgn004145	6.4076
gRNA_9958	BMgn002152	6.4076
gRNA_75760	BMgn014425	6.4076
gRNA_55369	BMgn010717	6.4076
gRNA_53557	BMgn010400	6.4076
gRNA_27689	BMgn005724	6.4076
gRNA_23866	BMgn005022	6.4076
gRNA_12901	BMgn002790	6.3917
gRNA_82473	BMgn015591	6.3841
gRNA_34279	BMgn006922	6.3817
gRNA_68497	BMgn013096	6.3635
gRNA_70299	BMgn013409	6.3632
gRNA_28198	BMgn005817	6.3537
gRNA_8483	BMgn001835	6.3525
gRNA_54861	BMgn010629	6.3508
gRNA_41029	BMgn008127	6.3461
gRNA_41941	BMgn008295	6.3457
gRNA_88369	BMgn016609	6.3397
gRNA_4414	BMgn000959	6.3128
gRNA_22633	BMgn004805	6.3128
gRNA_30977	BMgn006322	6.3128
gRNA_23347	BMgn004931	6.3128
gRNA_87694	BMgn016492	6.3128
gRNA_82622	BMgn015617	6.3128
gRNA_66741	BMgn012773	6.3128
gRNA_93447	BMgn017491	6.3128
gRNA_46280	BMgn009071	6.3128
gRNA_3089	BMgn000672	6.3128
gRNA_27174	BMgn005629	6.3128
gRNA_27943	BMgn005769	6.3128
gRNA_54926	BMgn010640	6.3128
gRNA_80737	BMgn015294	6.3128
gRNA_40013	BMgn007944	6.3128
gRNA_60372	BMgn011620	6.3128
gRNA_35849	BMgn007205	6.3128
gRNA_43470	BMgn008569	6.3128
gRNA_50323	BMgn009802	6.3118
gRNA_66946	BMgn012811	6.302
gRNA_22290	BMgn004747	6.2959
gRNA_21435	BMgn004591	6.2834
gRNA_84801	BMgn015992	6.2834
gRNA_39904	BMgn007926	6.2814
gRNA_77516	BMgn014747	6.2516
gRNA_2719	BMgn000587	6.2507
gRNA_37955	BMgn007581	6.2455
gRNA_4852	BMgn001051	6.2298
gRNA_18165	BMgn003924	6.218
gRNA_56014	BMgn010829	6.218
gRNA_33878	BMgn006851	6.218
gRNA_54443	BMgn010556	6.218
gRNA_50366	BMgn009810	6.218
gRNA_34958	BMgn007043	6.218
gRNA_69482	BMgn013268	6.218
gRNA_22300	BMgn004748	6.218
gRNA_55027	BMgn010657	6.218
gRNA_62717	BMgn012038	6.218
gRNA_87844	BMgn016518	6.218
gRNA_33288	BMgn006746	6.212
gRNA_32166	BMgn006542	6.212
gRNA_27705	BMgn005727	6.212
gRNA_25746	BMgn005369	6.2077
gRNA_71647	BMgn013652	6.2077
gRNA_24989	BMgn005237	6.2063
gRNA_39807	BMgn007909	6.2032
gRNA_60653	BMgn011672	6.2031
gRNA_87426	BMgn016447	6.1996
gRNA_9760	BMgn002111	6.1793
gRNA_29967	BMgn006135	6.1727
gRNA_20639	BMgn004444	6.1537
gRNA_32838	BMgn006664	6.1451
gRNA_91265	BMgn017113	6.1407
gRNA_57225	BMgn011044	6.1407
gRNA_82947	BMgn015672	6.1359
gRNA_82902	BMgn015665	6.1356
gRNA_34978	BMgn007046	6.1265
gRNA_73464	BMgn013985	6.125
gRNA_59736	BMgn011505	6.1232
gRNA_31484	BMgn006415	6.1232
gRNA_31021	BMgn006329	6.1232
gRNA_18119	BMgn003914	6.1232
gRNA_31127	BMgn006348	6.1232
gRNA_17560	BMgn003785	6.1232
gRNA_68974	BMgn013179	6.1232
gRNA_59232	BMgn011417	6.1232
gRNA_58011	BMgn011193	6.1232
gRNA_11179	BMgn002426	6.1232
gRNA_39637	BMgn007879	6.1232
gRNA_17205	BMgn003710	6.1232
gRNA_37251	BMgn007460	6.1232
gRNA_57477	BMgn011090	6.1232
gRNA_77837	BMgn014800	6.1047
gRNA_4804	BMgn001041	6.0928
gRNA_65552	BMgn012556	6.0599
gRNA_62817	BMgn012055	6.0591
gRNA_66296	BMgn012690	6.0479
gRNA_73471	BMgn013986	6.0382
gRNA_48192	BMgn009425	6.0285
gRNA_67940	BMgn012991	6.0285
gRNA_51688	BMgn010064	6.0285
gRNA_83319	BMgn015736	6.0285
gRNA_20271	BMgn004377	6.0285
gRNA_13373	BMgn002889	6.0285
gRNA_5730	BMgn001243	6.0285
gRNA_10962	BMgn002380	6.0285
gRNA_55260	BMgn010698	6.0285
gRNA_58457	BMgn011275	6.0285
gRNA_41006	BMgn008122	6.0285
gRNA_56715	BMgn010954	6.0285
gRNA_3204	BMgn000695	6.0285
gRNA_93694	BMgn017537	6.0285
gRNA_68859	BMgn013157	6.0285
gRNA_27090	BMgn005612	6.0285
gRNA_15634	BMgn003377	6.0218
gRNA_25838	BMgn005386	6.0153
gRNA_70782	BMgn013497	6.0112
gRNA_77240	BMgn014699	6.0046
gRNA_62122	BMgn011934	6.0038
gRNA_54318	BMgn010535	5.999
gRNA_57094	BMgn011020	5.999
gRNA_22462	BMgn004775	5.9971
gRNA_63760	BMgn012223	5.9939
gRNA_85600	BMgn016130	5.9868
gRNA_20561	BMgn004426	5.9817
gRNA_16314	BMgn003520	5.9567
gRNA_22599	BMgn004799	5.9556
gRNA_63820	BMgn012233	5.9478
gRNA_56510	BMgn010920	5.9431
gRNA_8697	BMgn001879	5.939
gRNA_29989	BMgn006141	5.9366
gRNA_50000	BMgn009744	5.9337
gRNA_21545	BMgn004612	5.9337
gRNA_85720	BMgn016150	5.9337
gRNA_4469	BMgn000970	5.9337
gRNA_48884	BMgn009546	5.9337
gRNA_3738	BMgn000813	5.9337
gRNA_76692	BMgn014601	5.9337
gRNA_75801	BMgn014432	5.9337
gRNA_7658	BMgn001658	5.9337
gRNA_12875	BMgn002785	5.9337
gRNA_85699	BMgn016147	5.9337
gRNA_51367	BMgn010005	5.9287
gRNA_43906	BMgn008647	5.9195
gRNA_63227	BMgn012129	5.9145
gRNA_65091	BMgn012470	5.9055
gRNA_21399	BMgn004583	5.9055
gRNA_81320	BMgn015392	5.9038
gRNA_56632	BMgn010941	5.9012
gRNA_48575	BMgn009493	5.8954
gRNA_34695	BMgn006995	5.8927
gRNA_25187	BMgn005270	5.8927
gRNA_57329	BMgn011064	5.8899
gRNA_48644	BMgn009504	5.8779
gRNA_73206	BMgn013934	5.8731
gRNA_22596	BMgn004799	5.8731
gRNA_22073	BMgn004706	5.866
gRNA_64410	BMgn012341	5.8549
gRNA_20835	BMgn004477	5.8524
gRNA_21344	BMgn004572	5.8517
gRNA_21638	BMgn004629	5.8469
gRNA_74068	BMgn014097	5.84
gRNA_43171	BMgn008515	5.8389
gRNA_68896	BMgn013166	5.8389
gRNA_75638	BMgn014403	5.8389
gRNA_5763	BMgn001250	5.8389
gRNA_46197	BMgn009055	5.8389
gRNA_75911	BMgn014452	5.8389
gRNA_85275	BMgn016073	5.8389
gRNA_34804	BMgn007015	5.8389
gRNA_29460	BMgn006045	5.8389
gRNA_78271	BMgn014874	5.8389
gRNA_81803	BMgn015476	5.8389
gRNA_29306	BMgn006018	5.824
gRNA_83290	BMgn015731	5.82
gRNA_3058	BMgn000666	5.8188
gRNA_46905	BMgn009184	5.8151
gRNA_74021	BMgn014088	5.8151
gRNA_32547	BMgn006613	5.8062
gRNA_5573	BMgn001211	5.8062
gRNA_3348	BMgn000725	5.7906
gRNA_86694	BMgn016318	5.7853
gRNA_16312	BMgn003520	5.783
gRNA_70217	BMgn013396	5.7797
gRNA_72228	BMgn013761	5.7775
gRNA_2414	BMgn000521	5.77
gRNA_586	BMgn000129	5.7657
gRNA_80979	BMgn015335	5.7631
gRNA_49330	BMgn009625	5.7587
gRNA_8405	BMgn001818	5.7503
gRNA_14587	BMgn003153	5.7503
gRNA_64997	BMgn012451	5.7441
gRNA_22100	BMgn004711	5.7441
gRNA_79770	BMgn015130	5.7441
gRNA_20659	BMgn004447	5.7441
gRNA_57385	BMgn011073	5.7441
gRNA_30272	BMgn006194	5.7441
gRNA_16578	BMgn003576	5.7441
gRNA_88083	BMgn016560	5.7441
gRNA_60774	BMgn011692	5.7413
gRNA_63282	BMgn012139	5.7368
gRNA_68501	BMgn013096	5.7333
gRNA_63429	BMgn012165	5.7325
gRNA_32940	BMgn006681	5.7315
gRNA_93750	BMgn017547	5.7286
gRNA_10245	BMgn002220	5.7262
gRNA_21850	BMgn004668	5.7218
gRNA_511	BMgn000114	5.7185
gRNA_15979	BMgn003448	5.708
gRNA_57506	BMgn011095	5.708
gRNA_48891	BMgn009547	5.6974
gRNA_65562	BMgn012557	5.695
gRNA_78793	BMgn014962	5.6935
gRNA_13903	BMgn003004	5.6917
gRNA_70917	BMgn013519	5.6914
gRNA_20117	BMgn004350	5.6911
gRNA_73959	BMgn014077	5.6894
gRNA_67876	BMgn012978	5.6785
gRNA_75646	BMgn014405	5.6749
gRNA_19246	BMgn004163	5.6749
gRNA_60387	BMgn011623	5.6665
gRNA_70350	BMgn013422	5.663
gRNA_35180	BMgn007082	5.6611
gRNA_11128	BMgn002415	5.6607
gRNA_80056	BMgn015179	5.6607
gRNA_43870	BMgn008641	5.6599
gRNA_88408	BMgn016615	5.6599
gRNA_45061	BMgn008854	5.6568
gRNA_22954	BMgn004861	5.6568
gRNA_45986	BMgn009016	5.6568
gRNA_84291	BMgn015902	5.6493
gRNA_45717	BMgn008966	5.6493
gRNA_54922	BMgn010640	5.6493
gRNA_68102	BMgn013018	5.6493
gRNA_48459	BMgn009473	5.6493
gRNA_53087	BMgn010317	5.6493
gRNA_91156	BMgn017094	5.6493
gRNA_82273	BMgn015556	5.6493
gRNA_37343	BMgn007475	5.6493
gRNA_66649	BMgn012758	5.6493
gRNA_47696	BMgn009335	5.6493
gRNA_40768	BMgn008079	5.6303
gRNA_22707	BMgn004817	5.6292
gRNA_68555	BMgn013105	5.623
gRNA_30078	BMgn006158	5.6215
gRNA_31940	BMgn006504	5.6202
gRNA_66751	BMgn012775	5.6178
gRNA_77830	BMgn014799	5.6154
gRNA_64574	BMgn012371	5.6101
gRNA_956	BMgn000211	5.6101
gRNA_45412	BMgn008914	5.6079
gRNA_56931	BMgn010992	5.6023
gRNA_59914	BMgn011539	5.6009
gRNA_7200	BMgn001557	5.6002
gRNA_61069	BMgn011747	5.6002
gRNA_13481	BMgn002911	5.5997
gRNA_26162	BMgn005446	5.592
gRNA_15008	BMgn003246	5.5874
gRNA_35444	BMgn007131	5.5852
gRNA_91425	BMgn017141	5.5828
gRNA_4647	BMgn001007	5.5823
gRNA_23425	BMgn004944	5.5763
gRNA_72360	BMgn013785	5.5757
gRNA_71047	BMgn013542	5.5693
gRNA_74485	BMgn014177	5.5665
gRNA_56664	BMgn010946	5.558
gRNA_43846	BMgn008637	5.5559
gRNA_25321	BMgn005292	5.5545
gRNA_69763	BMgn013316	5.5545
gRNA_3900	BMgn000846	5.5545
gRNA_11810	BMgn002561	5.5545
gRNA_22034	BMgn004698	5.5545
gRNA_44140	BMgn008686	5.5545
gRNA_27754	BMgn005736	5.5545
gRNA_72089	BMgn013731	5.5545
gRNA_23761	BMgn005001	5.5545
gRNA_63304	BMgn012142	5.5545
gRNA_4434	BMgn000963	5.5545
gRNA_45463	BMgn008922	5.5545
gRNA_1983	BMgn000428	5.5545
gRNA_25162	BMgn005266	5.5545
gRNA_29574	BMgn006065	5.5545
gRNA_76970	BMgn014652	5.5545
gRNA_67492	BMgn012910	5.5449
gRNA_27326	BMgn005657	5.543
gRNA_45722	BMgn008967	5.518
gRNA_6140	BMgn001332	5.5047
gRNA_54039	BMgn010487	5.5027
gRNA_89231	BMgn016761	5.5021
gRNA_30695	BMgn006271	5.5021
gRNA_18447	BMgn003986	5.4989
gRNA_6049	BMgn001312	5.4941
gRNA_62628	BMgn012023	5.4902
gRNA_43131	BMgn008507	5.4864
gRNA_38896	BMgn007744	5.4791
gRNA_41050	BMgn008131	5.4704
gRNA_77310	BMgn014711	5.4634
gRNA_11666	BMgn002530	5.4597
gRNA_4376	BMgn000949	5.4597
gRNA_41524	BMgn008221	5.4597
gRNA_13658	BMgn002949	5.4597
gRNA_91027	BMgn017073	5.4597
gRNA_16723	BMgn003608	5.4597
gRNA_30669	BMgn006266	5.4597
gRNA_55026	BMgn010657	5.4597
gRNA_24236	BMgn005091	5.4597
gRNA_91910	BMgn017227	5.4597
gRNA_4453	BMgn000967	5.4597
gRNA_25565	BMgn005337	5.4597
gRNA_27032	BMgn005600	5.4597
gRNA_49533	BMgn009661	5.4597
gRNA_93460	BMgn017493	5.4597
gRNA_51305	BMgn009992	5.4597
gRNA_23487	BMgn004955	5.4579
gRNA_37254	BMgn007460	5.4555
gRNA_87057	BMgn016383	5.4485
gRNA_20156	BMgn004356	5.447
gRNA_4638	BMgn001005	5.4341
gRNA_83440	BMgn015758	5.4322
gRNA_7972	BMgn001724	5.4281
gRNA_37751	BMgn007543	5.4271
gRNA_53025	BMgn010304	5.4224
gRNA_48081	BMgn009403	5.4192
gRNA_57898	BMgn011170	5.4172
gRNA_6269	BMgn001360	5.4139
gRNA_65583	BMgn012561	5.4076
gRNA_13675	BMgn002953	5.3945
gRNA_18503	BMgn003997	5.3878
gRNA_23991	BMgn005046	5.3779
gRNA_32420	BMgn006588	5.3729
gRNA_1598	BMgn000345	5.37
gRNA_86734	BMgn016326	5.3649
gRNA_56207	BMgn010864	5.3649
gRNA_16144	BMgn003483	5.3649
gRNA_17179	BMgn003705	5.3649
gRNA_423	BMgn000092	5.3649
gRNA_15405	BMgn003329	5.3649
gRNA_53870	BMgn010458	5.3649
gRNA_40208	BMgn007980	5.3649
gRNA_86689	BMgn016317	5.3649
gRNA_75101	BMgn014294	5.3649
gRNA_57280	BMgn011055	5.3649
gRNA_43095	BMgn008501	5.3649
gRNA_70513	BMgn013451	5.3649
gRNA_86309	BMgn016252	5.3649
gRNA_7524	BMgn001630	5.3649
gRNA_13530	BMgn002922	5.3649
gRNA_43500	BMgn008574	5.3649
gRNA_70601	BMgn013465	5.3649
gRNA_75686	BMgn014412	5.3649
gRNA_59770	BMgn011512	5.3626
gRNA_53958	BMgn010474	5.3621
gRNA_21692	BMgn004638	5.3495
gRNA_20070	BMgn004342	5.3381
gRNA_10063	BMgn002179	5.3319
gRNA_61009	BMgn011737	5.3301
gRNA_85282	BMgn016075	5.3296
gRNA_66674	BMgn012762	5.3272
gRNA_3353	BMgn000726	5.3257
gRNA_4956	BMgn001073	5.3246
gRNA_26880	BMgn005574	5.3225
gRNA_68264	BMgn013053	5.3219
gRNA_80050	BMgn015178	5.3214
gRNA_63374	BMgn012155	5.3204
gRNA_89871	BMgn016871	5.313
gRNA_90166	BMgn016922	5.3097
gRNA_28712	BMgn005914	5.3062
gRNA_71764	BMgn013676	5.3019
gRNA_24077	BMgn005061	5.2962
gRNA_89155	BMgn016748	5.2962
gRNA_17763	BMgn003829	5.2962
gRNA_38399	BMgn007656	5.2916
gRNA_30666	BMgn006265	5.29
gRNA_56552	BMgn010927	5.288
gRNA_59040	BMgn011379	5.2878
gRNA_43137	BMgn008508	5.2858
gRNA_51016	BMgn009937	5.2858
gRNA_74325	BMgn014143	5.2781
gRNA_8922	BMgn001927	5.2701
gRNA_50880	BMgn009907	5.2701
gRNA_92493	BMgn017327	5.2701
gRNA_50769	BMgn009888	5.2701
gRNA_53879	BMgn010460	5.2701
gRNA_44114	BMgn008682	5.2701
gRNA_16117	BMgn003478	5.2701
gRNA_31659	BMgn006453	5.2701
gRNA_76712	BMgn014605	5.2701
gRNA_58962	BMgn011366	5.2701
gRNA_54722	BMgn010604	5.2701
gRNA_36663	BMgn007348	5.2701
gRNA_88207	BMgn016581	5.2701
gRNA_21918	BMgn004679	5.2701
gRNA_1253	BMgn000275	5.2701
gRNA_82511	BMgn015598	5.2701
gRNA_48152	BMgn009417	5.2701
gRNA_24276	BMgn005102	5.2701
gRNA_30070	BMgn006156	5.2701
gRNA_32366	BMgn006578	5.2688
gRNA_15967	BMgn003446	5.2673
gRNA_76493	BMgn014558	5.2667
gRNA_5758	BMgn001249	5.2633
gRNA_12702	BMgn002747	5.2611
gRNA_66145	BMgn012659	5.2584
gRNA_25119	BMgn005258	5.2584
gRNA_19300	BMgn004175	5.2452
gRNA_23583	BMgn004971	5.2403
gRNA_41149	BMgn008148	5.239
gRNA_24397	BMgn005127	5.2375
gRNA_3747	BMgn000815	5.2311
gRNA_71417	BMgn013610	5.23
gRNA_67418	BMgn012895	5.2284
gRNA_33657	BMgn006811	5.228
gRNA_85790	BMgn016162	5.2271
gRNA_11345	BMgn002460	5.2229
gRNA_63259	BMgn012135	5.2147
gRNA_83694	BMgn015800	5.2147
gRNA_49574	BMgn009668	5.2109
gRNA_20827	BMgn004476	5.2066
gRNA_30435	BMgn006222	5.204
gRNA_89166	BMgn016749	5.1943
gRNA_60338	BMgn011614	5.1943
gRNA_4584	BMgn000994	5.1913
gRNA_6396	BMgn001386	5.1904
gRNA_6436	BMgn001395	5.1888
gRNA_18945	BMgn004095	5.1888
gRNA_31634	BMgn006449	5.1878
gRNA_87091	BMgn016389	5.1846
gRNA_82512	BMgn015598	5.1828
gRNA_74782	BMgn014234	5.1814
gRNA_41284	BMgn008170	5.1807
gRNA_16370	BMgn003531	5.1753
gRNA_15991	BMgn003451	5.1753
gRNA_66861	BMgn012795	5.1753
gRNA_65946	BMgn012625	5.1753
gRNA_34850	BMgn007023	5.1753
gRNA_11998	BMgn002602	5.1753
gRNA_35776	BMgn007192	5.1753
gRNA_15322	BMgn003312	5.1753
gRNA_1613	BMgn000348	5.1672
gRNA_16809	BMgn003627	5.16
gRNA_77390	BMgn014725	5.1584
gRNA_46637	BMgn009135	5.1546
gRNA_52094	BMgn010139	5.1508
gRNA_90921	BMgn017054	5.1493
gRNA_10345	BMgn002241	5.1427
gRNA_4656	BMgn001009	5.1411
gRNA_40411	BMgn008016	5.1309
gRNA_39920	BMgn007929	5.1309
gRNA_26649	BMgn005533	5.1303
gRNA_39166	BMgn007794	5.1244
gRNA_55068	BMgn010664	5.1227
gRNA_73133	BMgn013922	5.1218
gRNA_26437	BMgn005495	5.1175
gRNA_10047	BMgn002176	5.1168
gRNA_23207	BMgn004906	5.1124
gRNA_11792	BMgn002557	5.1112
gRNA_61511	BMgn011824	5.1087
gRNA_40255	BMgn007988	5.1076
gRNA_72313	BMgn013777	5.1075
gRNA_30282	BMgn006196	5.1062
gRNA_15091	BMgn003263	5.1032
gRNA_83082	BMgn015695	5.1015
gRNA_28066	BMgn005793	5.1001
gRNA_6372	BMgn001382	5.1001
gRNA_31217	BMgn006365	5.0919
gRNA_92092	BMgn017258	5.0916
gRNA_41048	BMgn008131	5.0856
gRNA_58103	BMgn011212	5.0856
gRNA_66148	BMgn012660	5.083
gRNA_87465	BMgn016453	5.0805
gRNA_1181	BMgn000259	5.0805
gRNA_57215	BMgn011042	5.0805
gRNA_33695	BMgn006818	5.0805
gRNA_8237	BMgn001782	5.0805
gRNA_5013	BMgn001084	5.0805
gRNA_40293	BMgn007996	5.0805
gRNA_60894	BMgn011714	5.0805
gRNA_5316	BMgn001154	5.0805
gRNA_54630	BMgn010589	5.0805
gRNA_37575	BMgn007514	5.0805
gRNA_54654	BMgn010593	5.0805
gRNA_46710	BMgn009147	5.0805
gRNA_60986	BMgn011732	5.0805
gRNA_2328	BMgn000501	5.0767
gRNA_12925	BMgn002795	5.0719
gRNA_29172	BMgn005994	5.0692
gRNA_20262	BMgn004376	5.0614
gRNA_70148	BMgn013384	5.0613
gRNA_37625	BMgn007522	5.0561
gRNA_3407	BMgn000738	5.0552
gRNA_48751	BMgn009524	5.0479
gRNA_7311	BMgn001581	5.0424
gRNA_57069	BMgn011016	5.0424
gRNA_18850	BMgn004073	5.0409
gRNA_76728	BMgn014608	5.0392
gRNA_62371	BMgn011978	5.0342
gRNA_20675	BMgn004450	5.0323
gRNA_87907	BMgn016530	5.0321
gRNA_43051	BMgn008494	5.0309
gRNA_71179	BMgn013566	5.0265
gRNA_88516	BMgn016634	5.0235
gRNA_28958	BMgn005956	5.0217
gRNA_92681	BMgn017359	5.0157
gRNA_5349	BMgn001162	5.0083
gRNA_83881	BMgn015832	5.0037
gRNA_77452	BMgn014735	5.0035
gRNA_62834	BMgn012058	5.0012
gRNA_86352	BMgn016260	5.0012
gRNA_90487	BMgn016979	4.9995
gRNA_70243	BMgn013400	4.9951
gRNA_44331	BMgn008720	4.99
gRNA_18337	BMgn003961	4.9858
gRNA_64941	BMgn012441	4.9858
gRNA_18169	BMgn003924	4.9858
gRNA_42670	BMgn008424	4.9858
gRNA_35726	BMgn007183	4.9858
gRNA_54293	BMgn010531	4.9858
gRNA_35782	BMgn007193	4.9858
gRNA_25833	BMgn005386	4.9858
gRNA_61977	BMgn011907	4.9858
gRNA_76879	BMgn014636	4.9858
gRNA_52850	BMgn010272	4.9858
gRNA_1384	BMgn000303	4.9858
gRNA_76083	BMgn014482	4.9858
gRNA_12565	BMgn002719	4.9858
gRNA_77283	BMgn014706	4.9858
gRNA_5248	BMgn001139	4.9858
gRNA_41771	BMgn008266	4.9858
gRNA_14323	BMgn003094	4.9852
gRNA_85465	BMgn016108	4.9851
gRNA_79538	BMgn015090	4.9838
gRNA_37572	BMgn007513	4.9729
gRNA_2179	BMgn000469	4.9729
gRNA_59580	BMgn011477	4.9729
gRNA_15679	BMgn003386	4.9701
gRNA_62539	BMgn012008	4.9663
gRNA_27389	BMgn005667	4.9652
gRNA_30317	BMgn006201	4.9652
gRNA_26904	BMgn005578	4.9652
gRNA_42455	BMgn008386	4.9627
gRNA_65409	BMgn012525	4.9627
gRNA_18700	BMgn004041	4.9627
gRNA_38129	BMgn007610	4.9612
gRNA_86753	BMgn016329	4.961
gRNA_79638	BMgn015108	4.961
gRNA_53453	BMgn010382	4.959
gRNA_2760	BMgn000599	4.957
gRNA_88584	BMgn016645	4.954
gRNA_67651	BMgn012938	4.9488
gRNA_36425	BMgn007306	4.9384
gRNA_93245	BMgn017455	4.9384
gRNA_2892	BMgn000627	4.9382
gRNA_42770	BMgn008441	4.9375
gRNA_31547	BMgn006434	4.9338
gRNA_71320	BMgn013592	4.9291
gRNA_79960	BMgn015162	4.9273
gRNA_54499	BMgn010565	4.9176
gRNA_52283	BMgn010171	4.9162
gRNA_18389	BMgn003974	4.9149
gRNA_47224	BMgn009247	4.9085
gRNA_10707	BMgn002326	4.9085
gRNA_29517	BMgn006056	4.9076
gRNA_85127	BMgn016049	4.905
gRNA_21541	BMgn004612	4.9026
gRNA_48404	BMgn009462	4.9006
gRNA_55486	BMgn010737	4.9004
gRNA_55162	BMgn010680	4.8933
gRNA_12357	BMgn002675	4.8933
gRNA_53275	BMgn010352	4.8933
gRNA_75604	BMgn014398	4.8919
gRNA_21540	BMgn004611	4.891
gRNA_4811	BMgn001043	4.891
gRNA_21691	BMgn004638	4.891
gRNA_53809	BMgn010447	4.891
gRNA_37678	BMgn007531	4.891
gRNA_36116	BMgn007254	4.891
gRNA_60919	BMgn011721	4.891
gRNA_30830	BMgn006297	4.891
gRNA_1325	BMgn000290	4.891
gRNA_22396	BMgn004764	4.891
gRNA_87500	BMgn016459	4.891
gRNA_93329	BMgn017470	4.891
gRNA_18001	BMgn003889	4.891
gRNA_79190	BMgn015031	4.891
gRNA_24172	BMgn005080	4.891
gRNA_37514	BMgn007504	4.891
gRNA_8193	BMgn001773	4.891
gRNA_12232	BMgn002649	4.8905
gRNA_33118	BMgn006716	4.8877
gRNA_85521	BMgn016117	4.8877
gRNA_29374	BMgn006030	4.8861
gRNA_20590	BMgn004434	4.8847
gRNA_26032	BMgn005421	4.884
gRNA_49024	BMgn009572	4.884
gRNA_58230	BMgn011235	4.8827
gRNA_64094	BMgn012282	4.8823
gRNA_88213	BMgn016582	4.8804
gRNA_18166	BMgn003924	4.8715
gRNA_11224	BMgn002435	4.8715
gRNA_71529	BMgn013632	4.8621
gRNA_21869	BMgn004671	4.8616
gRNA_74433	BMgn014168	4.8614
gRNA_33165	BMgn006723	4.8575
gRNA_11557	BMgn002508	4.8548
gRNA_3016	BMgn000658	4.8457
gRNA_2188	BMgn000471	4.8457
gRNA_34544	BMgn006970	4.8372
gRNA_1909	BMgn000413	4.8335
gRNA_21593	BMgn004621	4.827
gRNA_80792	BMgn015303	4.8221
gRNA_65557	BMgn012556	4.8145
gRNA_23954	BMgn005040	4.8125
gRNA_20384	BMgn004396	4.8122
gRNA_64924	BMgn012437	4.8122
gRNA_68081	BMgn013014	4.8111
gRNA_20595	BMgn004434	4.8064
gRNA_75830	BMgn014438	4.8002
gRNA_6812	BMgn001478	4.8002
gRNA_10613	BMgn002303	4.7993
gRNA_90168	BMgn016923	4.7993
gRNA_67716	BMgn012949	4.7965
gRNA_34170	BMgn006902	4.7962
gRNA_27967	BMgn005773	4.7962
gRNA_82462	BMgn015589	4.7962
gRNA_2547	BMgn000551	4.7962
gRNA_5629	BMgn001223	4.7962
gRNA_78709	BMgn014948	4.7962
gRNA_46279	BMgn009070	4.7962
gRNA_18919	BMgn004088	4.7962
gRNA_33477	BMgn006779	4.7962
gRNA_54541	BMgn010572	4.7962
gRNA_1483	BMgn000322	4.7962
gRNA_84858	BMgn016002	4.7962
gRNA_13984	BMgn003021	4.7962
gRNA_55406	BMgn010723	4.7962
gRNA_29174	BMgn005994	4.7962
gRNA_67862	BMgn012976	4.7962
gRNA_88537	BMgn016638	4.7962
gRNA_55117	BMgn010672	4.7921
gRNA_71667	BMgn013656	4.7888
gRNA_66955	BMgn012814	4.7888
gRNA_44362	BMgn008726	4.7848
gRNA_63208	BMgn012126	4.7828
gRNA_84019	BMgn015856	4.7801
gRNA_76977	BMgn014654	4.7786
gRNA_58154	BMgn011222	4.7758
gRNA_5848	BMgn001269	4.7723
gRNA_62411	BMgn011985	4.7723
gRNA_68197	BMgn013034	4.7723
gRNA_15172	BMgn003280	4.7718
gRNA_32602	BMgn006623	4.7718
gRNA_34551	BMgn006971	4.7684
gRNA_28071	BMgn005794	4.7668
gRNA_60433	BMgn011631	4.7545
gRNA_16893	BMgn003644	4.7545
gRNA_35429	BMgn007125	4.7472
gRNA_76631	BMgn014590	4.7467
gRNA_3925	BMgn000851	4.7431
gRNA_51412	BMgn010013	4.7425
gRNA_18771	BMgn004057	4.7373
gRNA_74927	BMgn014259	4.732
gRNA_20532	BMgn004421	4.7288
gRNA_35934	BMgn007222	4.7288
gRNA_65314	BMgn012509	4.7276
gRNA_41429	BMgn008201	4.7268
gRNA_37752	BMgn007543	4.7176
gRNA_47447	BMgn009290	4.7166
gRNA_32086	BMgn006528	4.7162
gRNA_3387	BMgn000733	4.7082
gRNA_18474	BMgn003991	4.705
gRNA_83126	BMgn015702	4.7025
gRNA_66221	BMgn012674	4.7014
gRNA_80342	BMgn015227	4.7014
gRNA_35183	BMgn007083	4.7014
gRNA_8435	BMgn001825	4.7014
gRNA_61864	BMgn011888	4.7014
gRNA_53303	BMgn010357	4.7014
gRNA_3477	BMgn000754	4.7014
gRNA_17855	BMgn003852	4.7014
gRNA_91090	BMgn017083	4.7014
gRNA_24269	BMgn005101	4.7014
gRNA_3729	BMgn000811	4.7014
gRNA_20526	BMgn004420	4.7014
gRNA_53242	BMgn010347	4.7014
gRNA_13896	BMgn003002	4.7014
gRNA_1178	BMgn000259	4.7014
gRNA_19266	BMgn004167	4.7014
gRNA_31117	BMgn006346	4.7006
gRNA_45969	BMgn009013	4.6966
gRNA_84570	BMgn015952	4.6964
gRNA_93017	BMgn017416	4.6933
gRNA_36810	BMgn007380	4.6928
gRNA_12776	BMgn002763	4.6928
gRNA_14635	BMgn003162	4.6928
gRNA_81956	BMgn015502	4.6911
gRNA_17067	BMgn003681	4.6851
gRNA_12827	BMgn002774	4.6851
gRNA_85466	BMgn016108	4.6816
gRNA_92302	BMgn017294	4.6747
gRNA_73316	BMgn013954	4.6701
gRNA_77836	BMgn014800	4.6694
gRNA_85140	BMgn016051	4.6614
gRNA_56239	BMgn010869	4.6598
gRNA_68521	BMgn013100	4.657
gRNA_20656	BMgn004447	4.657
gRNA_10151	BMgn002199	4.6516
gRNA_9282	BMgn002005	4.6507
gRNA_62513	BMgn012004	4.6492
gRNA_26447	BMgn005497	4.6485
gRNA_71703	BMgn013664	4.6471
gRNA_5256	BMgn001142	4.6471
gRNA_64893	BMgn012427	4.6431
gRNA_879	BMgn000194	4.6365
gRNA_3702	BMgn000805	4.6356
gRNA_13262	BMgn002865	4.6351
gRNA_71688	BMgn013659	4.6305
gRNA_4085	BMgn000883	4.6266
gRNA_91844	BMgn017215	4.6236
gRNA_48708	BMgn009515	4.62
gRNA_67707	BMgn012947	4.6172
gRNA_23570	BMgn004968	4.6165
gRNA_63055	BMgn012098	4.607
gRNA_42866	BMgn008459	4.6066
gRNA_74139	BMgn014109	4.6066
gRNA_78129	BMgn014850	4.6066
gRNA_26780	BMgn005557	4.6066
gRNA_35463	BMgn007134	4.6066
gRNA_63572	BMgn012189	4.6066
gRNA_84587	BMgn015955	4.6066
gRNA_73143	BMgn013923	4.6066
gRNA_34187	BMgn006906	4.6066
gRNA_69915	BMgn013343	4.6066
gRNA_59531	BMgn011468	4.6066
gRNA_54473	BMgn010561	4.6066
gRNA_66737	BMgn012772	4.6066
gRNA_72934	BMgn013889	4.6066
gRNA_55423	BMgn010726	4.6066
gRNA_62032	BMgn011916	4.6066
gRNA_896	BMgn000198	4.6064
gRNA_89683	BMgn016839	4.6062
gRNA_89352	BMgn016782	4.6043
gRNA_80348	BMgn015228	4.6028
gRNA_43442	BMgn008564	4.5952
gRNA_26889	BMgn005575	4.5947
gRNA_63679	BMgn012207	4.5942
gRNA_60140	BMgn011581	4.5886
gRNA_73128	BMgn013921	4.588
gRNA_55078	BMgn010666	4.5869
gRNA_15481	BMgn003345	4.5839
gRNA_980	BMgn000216	4.5835
gRNA_44705	BMgn008792	4.5828
gRNA_88648	BMgn016658	4.582
gRNA_90261	BMgn016939	4.5805
gRNA_4669	BMgn001011	4.5779
gRNA_40096	BMgn007959	4.5746
gRNA_31336	BMgn006386	4.5736
gRNA_60683	BMgn011677	4.5736
gRNA_82215	BMgn015546	4.5736
gRNA_18375	BMgn003972	4.5736
gRNA_55313	BMgn010707	4.5705
gRNA_90369	BMgn016959	4.5661
gRNA_33840	BMgn006844	4.5571
gRNA_3707	BMgn000807	4.5526
gRNA_49975	BMgn009740	4.5525
gRNA_64577	BMgn012372	4.5505
gRNA_30197	BMgn006178	4.5486
gRNA_46090	BMgn009035	4.5471
gRNA_18104	BMgn003910	4.5463
gRNA_47480	BMgn009296	4.5394
gRNA_66806	BMgn012785	4.5348
gRNA_2567	BMgn000556	4.5347
gRNA_63549	BMgn012186	4.5345
gRNA_34795	BMgn007011	4.534
gRNA_32740	BMgn006646	4.5336
gRNA_1128	BMgn000249	4.5318
gRNA_11086	BMgn002406	4.5313
gRNA_8267	BMgn001788	4.5245
gRNA_19600	BMgn004241	4.523
gRNA_90701	BMgn017016	4.5224
gRNA_47204	BMgn009243	4.5118
gRNA_44358	BMgn008725	4.5118
gRNA_22764	BMgn004828	4.5118
gRNA_32442	BMgn006592	4.5118
gRNA_82569	BMgn015608	4.5118
gRNA_78729	BMgn014951	4.5118
gRNA_73393	BMgn013972	4.5118
gRNA_74109	BMgn014104	4.5118
gRNA_26454	BMgn005498	4.5118
gRNA_35240	BMgn007092	4.5118
gRNA_30946	BMgn006317	4.5118
gRNA_13753	BMgn002972	4.5118
gRNA_33223	BMgn006734	4.5118
gRNA_66810	BMgn012785	4.5118
gRNA_59518	BMgn011466	4.5118
gRNA_79814	BMgn015137	4.5118
gRNA_26673	BMgn005539	4.5118
gRNA_29007	BMgn005966	4.5118
gRNA_75863	BMgn014444	4.5118
gRNA_63724	BMgn012215	4.5118
gRNA_45962	BMgn009012	4.5118
gRNA_23599	BMgn004973	4.5118
gRNA_59084	BMgn011388	4.5118
gRNA_37598	BMgn007518	4.5118
gRNA_1301	BMgn000285	4.5118
gRNA_81322	BMgn015393	4.5118
gRNA_51812	BMgn010089	4.5118
gRNA_43371	BMgn008552	4.5118
gRNA_27039	BMgn005601	4.5118
gRNA_70829	BMgn013504	4.5118
gRNA_24300	BMgn005107	4.5118
gRNA_57471	BMgn011089	4.5118
gRNA_82154	BMgn015536	4.5118
gRNA_53352	BMgn010365	4.5118
gRNA_61175	BMgn011765	4.5118
gRNA_69746	BMgn013312	4.5082
gRNA_41691	BMgn008253	4.5082
gRNA_12742	BMgn002755	4.5044
gRNA_48613	BMgn009499	4.497
gRNA_25764	BMgn005373	4.4957
gRNA_85697	BMgn016146	4.4897
gRNA_39196	BMgn007799	4.4866
gRNA_36008	BMgn007236	4.4858
gRNA_82937	BMgn015671	4.4846
gRNA_49144	BMgn009592	4.4819
gRNA_6445	BMgn001397	4.4795
gRNA_15615	BMgn003373	4.4795
gRNA_65013	BMgn012454	4.4769
gRNA_60066	BMgn011565	4.4769
gRNA_76378	BMgn014537	4.4711
gRNA_70556	BMgn013458	4.47
gRNA_65821	BMgn012604	4.4684
gRNA_79809	BMgn015136	4.4605
gRNA_2277	BMgn000491	4.4553
gRNA_4773	BMgn001035	4.4482
gRNA_4134	BMgn000896	4.4475
gRNA_11691	BMgn002535	4.4469
gRNA_25186	BMgn005270	4.4464
gRNA_35787	BMgn007194	4.4433
gRNA_15451	BMgn003338	4.4433
gRNA_4449	BMgn000966	4.4433
gRNA_55594	BMgn010755	4.4406
gRNA_20085	BMgn004344	4.4405
gRNA_49136	BMgn009590	4.4397
gRNA_19166	BMgn004143	4.4363
gRNA_46570	BMgn009124	4.4328
gRNA_27335	BMgn005658	4.4258
gRNA_47617	BMgn009321	4.4239
gRNA_11894	BMgn002579	4.4239
gRNA_56628	BMgn010940	4.4184
gRNA_11761	BMgn002551	4.417
gRNA_61529	BMgn011827	4.417
gRNA_38690	BMgn007708	4.417
gRNA_87861	BMgn016521	4.417
gRNA_65611	BMgn012567	4.417
gRNA_67151	BMgn012851	4.417
gRNA_85088	BMgn016042	4.417
gRNA_36069	BMgn007246	4.417
gRNA_71144	BMgn013559	4.417
gRNA_39568	BMgn007868	4.417
gRNA_67166	BMgn012853	4.417
gRNA_41275	BMgn008169	4.417
gRNA_10916	BMgn002371	4.417
gRNA_69403	BMgn013255	4.417
gRNA_77652	BMgn014770	4.417
gRNA_49945	BMgn009735	4.417
gRNA_75819	BMgn014435	4.417
gRNA_45679	BMgn008959	4.417
gRNA_11907	BMgn002582	4.417
gRNA_5638	BMgn001225	4.417
gRNA_11651	BMgn002527	4.4169
gRNA_22716	BMgn004819	4.4158
gRNA_92765	BMgn017374	4.415
gRNA_36496	BMgn007319	4.415
gRNA_61843	BMgn011884	4.4106
gRNA_27918	BMgn005764	4.4078
gRNA_81479	BMgn015419	4.4055
gRNA_67969	BMgn012996	4.4024
gRNA_32175	BMgn006545	4.4003
gRNA_29453	BMgn006044	4.397
gRNA_65521	BMgn012546	4.3965
gRNA_68729	BMgn013135	4.3869
gRNA_471	BMgn000106	4.3869
gRNA_10925	BMgn002373	4.3793
gRNA_39080	BMgn007780	4.3769
gRNA_44893	BMgn008825	4.3769
gRNA_4320	BMgn000938	4.3756
gRNA_41076	BMgn008135	4.3749
gRNA_39747	BMgn007899	4.3749
gRNA_11437	BMgn002481	4.3726
gRNA_34678	BMgn006992	4.3725
gRNA_20824	BMgn004476	4.3725
gRNA_14849	BMgn003211	4.3724
gRNA_76465	BMgn014553	4.3694
gRNA_17739	BMgn003823	4.3662
gRNA_2228	BMgn000479	4.3641
gRNA_10013	BMgn002169	4.3554
gRNA_29055	BMgn005975	4.355
gRNA_10935	BMgn002375	4.3537
gRNA_88904	BMgn016703	4.3519
gRNA_89567	BMgn016819	4.3514
gRNA_28554	BMgn005884	4.3508
gRNA_79829	BMgn015140	4.3454
gRNA_13759	BMgn002973	4.3435
gRNA_45141	BMgn008868	4.3435
gRNA_11941	BMgn002589	4.3427
gRNA_12464	BMgn002698	4.3427
gRNA_35990	BMgn007232	4.3381
gRNA_63895	BMgn012248	4.3381
gRNA_91570	BMgn017168	4.3331
gRNA_14170	BMgn003061	4.3284
gRNA_69783	BMgn013319	4.3245
gRNA_56069	BMgn010839	4.3232
gRNA_38873	BMgn007739	4.3222
gRNA_45365	BMgn008906	4.3222
gRNA_29014	BMgn005967	4.3222
gRNA_31851	BMgn006489	4.3222
gRNA_82811	BMgn015650	4.3222
gRNA_57223	BMgn011044	4.3222
gRNA_48508	BMgn009481	4.3222
gRNA_47847	BMgn009361	4.3222
gRNA_70835	BMgn013505	4.3222
gRNA_91220	BMgn017105	4.3222
gRNA_91850	BMgn017216	4.3222
gRNA_39609	BMgn007875	4.3222
gRNA_1682	BMgn000362	4.3222
gRNA_62505	BMgn012003	4.3222
gRNA_8039	BMgn001738	4.3222
gRNA_81274	BMgn015385	4.3222
gRNA_88710	BMgn016668	4.3222
gRNA_51142	BMgn009963	4.3222
gRNA_28751	BMgn005920	4.3175
gRNA_24883	BMgn005216	4.3053
gRNA_10460	BMgn002268	4.305
gRNA_34378	BMgn006942	4.305
gRNA_18553	BMgn004007	4.3034
gRNA_68936	BMgn013173	4.3025
gRNA_27456	BMgn005682	4.3025
gRNA_24548	BMgn005152	4.3014
gRNA_26517	BMgn005508	4.3006
gRNA_34049	BMgn006880	4.2939
gRNA_69404	BMgn013255	4.2904
gRNA_39082	BMgn007780	4.2878
gRNA_78175	BMgn014858	4.2849
gRNA_16219	BMgn003500	4.2809
gRNA_24581	BMgn005159	4.2806
gRNA_40764	BMgn008078	4.2799
gRNA_58508	BMgn011283	4.2799
gRNA_69086	BMgn013199	4.2799
gRNA_21439	BMgn004592	4.2798
gRNA_92084	BMgn017257	4.2798
gRNA_46743	BMgn009153	4.2768
gRNA_88604	BMgn016649	4.2758
gRNA_24413	BMgn005129	4.2756
gRNA_40068	BMgn007954	4.2753
gRNA_73425	BMgn013977	4.2747
gRNA_44105	BMgn008681	4.2716
gRNA_22343	BMgn004755	4.2666
gRNA_87749	BMgn016501	4.2632
gRNA_45162	BMgn008871	4.2605
gRNA_45644	BMgn008954	4.2567
gRNA_87692	BMgn016492	4.2554
gRNA_59561	BMgn011473	4.2534
gRNA_71474	BMgn013621	4.2526
gRNA_17167	BMgn003703	4.2522
gRNA_23427	BMgn004945	4.2458
gRNA_89923	BMgn016880	4.2449
gRNA_47930	BMgn009377	4.2407
gRNA_90142	BMgn016917	4.2386
gRNA_40912	BMgn008106	4.2368
gRNA_10743	BMgn002334	4.2368
gRNA_86857	BMgn016347	4.2334
gRNA_26654	BMgn005535	4.2312
gRNA_9585	BMgn002075	4.2284
gRNA_10109	BMgn002189	4.2274
gRNA_12909	BMgn002792	4.2274
gRNA_72582	BMgn013825	4.2274
gRNA_47465	BMgn009294	4.2274
gRNA_90885	BMgn017047	4.2274
gRNA_62683	BMgn012032	4.2274
gRNA_56736	BMgn010958	4.2274
gRNA_91598	BMgn017173	4.2274
gRNA_50549	BMgn009842	4.2274
gRNA_73321	BMgn013955	4.2274
gRNA_72052	BMgn013725	4.2274
gRNA_36457	BMgn007312	4.2274
gRNA_7199	BMgn001557	4.2274
gRNA_27135	BMgn005621	4.2274
gRNA_74436	BMgn014169	4.2274
gRNA_54622	BMgn010588	4.2274
gRNA_74209	BMgn014122	4.2274
gRNA_29083	BMgn005979	4.2274
gRNA_57132	BMgn011027	4.2274
gRNA_40176	BMgn007973	4.2274
gRNA_89276	BMgn016768	4.2274
gRNA_24033	BMgn005053	4.2272
gRNA_74767	BMgn014231	4.2267
gRNA_3252	BMgn000706	4.2204
gRNA_44891	BMgn008825	4.2169
gRNA_65571	BMgn012559	4.2149
gRNA_41949	BMgn008296	4.2092
gRNA_29562	BMgn006063	4.2048
gRNA_63283	BMgn012139	4.2041
gRNA_2199	BMgn000473	4.2018
gRNA_92046	BMgn017251	4.2007
gRNA_50284	BMgn009795	4.1993
gRNA_16110	BMgn003476	4.1942
gRNA_17298	BMgn003730	4.1933
gRNA_23984	BMgn005045	4.192
gRNA_76025	BMgn014472	4.1917
gRNA_86294	BMgn016249	4.1872
gRNA_68713	BMgn013133	4.187
gRNA_38285	BMgn007637	4.1816
gRNA_11409	BMgn002476	4.1786
gRNA_24	BMgn000005	4.1771
gRNA_34400	BMgn006946	4.1768
gRNA_80729	BMgn015293	4.1748
gRNA_73889	BMgn014064	4.1748
gRNA_47143	BMgn009231	4.1745
gRNA_12644	BMgn002735	4.1695
gRNA_6997	BMgn001516	4.1676
gRNA_32646	BMgn006630	4.1631
gRNA_65336	BMgn012512	4.1631
gRNA_30222	BMgn006183	4.1617
gRNA_3901	BMgn000847	4.1552
gRNA_4750	BMgn001030	4.1552
gRNA_49891	BMgn009726	4.155
gRNA_83008	BMgn015683	4.1532
gRNA_69466	BMgn013265	4.1517
gRNA_8490	BMgn001836	4.1501
gRNA_64322	BMgn012325	4.1407
gRNA_52821	BMgn010266	4.1407
gRNA_37509	BMgn007503	4.1399
gRNA_87923	BMgn016532	4.1399
gRNA_29913	BMgn006126	4.1385
gRNA_65543	BMgn012554	4.1365
gRNA_11809	BMgn002561	4.1326
gRNA_41827	BMgn008276	4.1326
gRNA_68793	BMgn013146	4.1326
gRNA_2709	BMgn000585	4.1326
gRNA_64124	BMgn012287	4.1326
gRNA_28689	BMgn005910	4.1326
gRNA_18672	BMgn004036	4.1326
gRNA_34844	BMgn007022	4.1326
gRNA_29424	BMgn006038	4.1326
gRNA_60576	BMgn011659	4.1326
gRNA_32997	BMgn006692	4.1326
gRNA_51737	BMgn010076	4.1326
gRNA_76279	BMgn014520	4.1326
gRNA_75008	BMgn014274	4.1326
gRNA_72921	BMgn013886	4.1326
gRNA_75720	BMgn014417	4.1326
gRNA_25078	BMgn005252	4.1326
gRNA_86276	BMgn016246	4.1326
gRNA_66647	BMgn012757	4.1326
gRNA_78963	BMgn014993	4.1326
gRNA_83068	BMgn015693	4.1326
gRNA_7657	BMgn001657	4.1326
gRNA_67326	BMgn012880	4.1326
gRNA_15272	BMgn003301	4.1309
gRNA_22506	BMgn004783	4.1301
gRNA_90930	BMgn017056	4.1292
gRNA_18228	BMgn003937	4.1271
gRNA_41279	BMgn008169	4.1271
gRNA_77530	BMgn014749	4.1271
gRNA_72931	BMgn013888	4.1248
gRNA_35929	BMgn007221	4.1217
gRNA_63417	BMgn012163	4.1217
gRNA_3068	BMgn000668	4.1203
gRNA_51091	BMgn009952	4.1088
gRNA_7702	BMgn001666	4.1064
gRNA_69193	BMgn013218	4.1043
gRNA_33323	BMgn006752	4.1043
gRNA_36549	BMgn007329	4.0986
gRNA_45082	BMgn008858	4.097
gRNA_38885	BMgn007741	4.0934
gRNA_72056	BMgn013725	4.0929
gRNA_26402	BMgn005488	4.0908
gRNA_70135	BMgn013382	4.0908
gRNA_29433	BMgn006040	4.0897
gRNA_9288	BMgn002006	4.0897
gRNA_26514	BMgn005508	4.0819
gRNA_34671	BMgn006991	4.0804
gRNA_16228	BMgn003502	4.0743
gRNA_6833	BMgn001482	4.0672
gRNA_14884	BMgn003218	4.0642
gRNA_55186	BMgn010684	4.0635
gRNA_67772	BMgn012958	4.0604
gRNA_65366	BMgn012517	4.0604
gRNA_51309	BMgn009992	4.0593
gRNA_77187	BMgn014689	4.0574
gRNA_29090	BMgn005980	4.0574
gRNA_21378	BMgn004577	4.0566
gRNA_17210	BMgn003711	4.0553
gRNA_47467	BMgn009294	4.054
gRNA_88456	BMgn016623	4.054
gRNA_75463	BMgn014371	4.0532
gRNA_13299	BMgn002874	4.0455
gRNA_15860	BMgn003423	4.0428
gRNA_16928	BMgn003652	4.0418
gRNA_17886	BMgn003860	4.0396
gRNA_21745	BMgn004647	4.0386
gRNA_37858	BMgn007563	4.0386
gRNA_68753	BMgn013139	4.0381
gRNA_33348	BMgn006756	4.0378
gRNA_58907	BMgn011357	4.0378
gRNA_91786	BMgn017206	4.0378
gRNA_35222	BMgn007089	4.0378
gRNA_35483	BMgn007137	4.0378
gRNA_50951	BMgn009922	4.0378
gRNA_77866	BMgn014805	4.0378
gRNA_5684	BMgn001234	4.0378
gRNA_35477	BMgn007136	4.0378
gRNA_83935	BMgn015841	4.0378
gRNA_39604	BMgn007874	4.0378
gRNA_56462	BMgn010911	4.0378
gRNA_85513	BMgn016116	4.0378
gRNA_27148	BMgn005623	4.0378
gRNA_33665	BMgn006813	4.0378
gRNA_18708	BMgn004043	4.0378
gRNA_29206	BMgn006000	4.0378
gRNA_18718	BMgn004045	4.0378
gRNA_33751	BMgn006828	4.0378
gRNA_53922	BMgn010467	4.0378
gRNA_64039	BMgn012272	4.0378
gRNA_88399	BMgn016614	4.0378
gRNA_83725	BMgn015805	4.0378
gRNA_74488	BMgn014177	4.0378
gRNA_48440	BMgn009468	4.0378
gRNA_30692	BMgn006271	4.0378
gRNA_36848	BMgn007387	4.0378
gRNA_90912	BMgn017052	4.0378
gRNA_37043	BMgn007424	4.0329
gRNA_24813	BMgn005204	4.0329
gRNA_60018	BMgn011557	4.0318
gRNA_13904	BMgn003004	4.0316
gRNA_62197	BMgn011948	4.0304
gRNA_52890	BMgn010279	4.0302
gRNA_45913	BMgn009002	4.0248
gRNA_28343	BMgn005842	4.0244
gRNA_64593	BMgn012374	4.023
gRNA_22465	BMgn004776	4.0229
gRNA_87776	BMgn016506	4.0214
gRNA_26274	BMgn005467	4.0202
gRNA_69980	BMgn013355	4.019
gRNA_3941	BMgn000855	4.018
gRNA_93576	BMgn017517	4.0176
gRNA_36416	BMgn007305	4.0112
gRNA_38458	BMgn007669	4.0087
gRNA_40966	BMgn008115	4.0066
gRNA_13325	BMgn002879	3.9975
gRNA_22525	BMgn004786	3.9967
gRNA_10941	BMgn002376	3.9967
gRNA_693	BMgn000156	3.9933
gRNA_49731	BMgn009698	3.9911
gRNA_84426	BMgn015926	3.9911
gRNA_46722	BMgn009149	3.9903
gRNA_33650	BMgn006810	3.9874
gRNA_12259	BMgn002655	3.9874
gRNA_50063	BMgn009755	3.9874
gRNA_3492	BMgn000758	3.9845
gRNA_80533	BMgn015259	3.9845
gRNA_62536	BMgn012008	3.9778
gRNA_2113	BMgn000456	3.9775
gRNA_72159	BMgn013745	3.9774
gRNA_73457	BMgn013984	3.9769
gRNA_3119	BMgn000678	3.9769
gRNA_10157	BMgn002200	3.9766
gRNA_21265	BMgn004559	3.9749
gRNA_2305	BMgn000496	3.9748
gRNA_80646	BMgn015279	3.9697
gRNA_56738	BMgn010958	3.9683
gRNA_14009	BMgn003026	3.9599
gRNA_55379	BMgn010718	3.9599
gRNA_38078	BMgn007602	3.9563
gRNA_55296	BMgn010704	3.955
gRNA_91289	BMgn017117	3.9539
gRNA_73870	BMgn014061	3.9531
gRNA_21149	BMgn004539	3.9531
gRNA_8875	BMgn001917	3.9528
gRNA_65130	BMgn012478	3.9502
gRNA_87422	BMgn016446	3.9498
gRNA_13160	BMgn002845	3.9484
gRNA_91809	BMgn017209	3.947
gRNA_21085	BMgn004524	3.9437
gRNA_49363	BMgn009630	3.9435
gRNA_59737	BMgn011505	3.943
gRNA_82503	BMgn015596	3.943
gRNA_70848	BMgn013508	3.943
gRNA_50817	BMgn009897	3.943
gRNA_16103	BMgn003475	3.943
gRNA_8046	BMgn001740	3.943
gRNA_40229	BMgn007984	3.943
gRNA_42650	BMgn008421	3.943
gRNA_28093	BMgn005798	3.943
gRNA_59111	BMgn011393	3.943
gRNA_55370	BMgn010717	3.943
gRNA_56236	BMgn010869	3.943
gRNA_49168	BMgn009596	3.943
gRNA_18766	BMgn004056	3.943
gRNA_22169	BMgn004723	3.943
gRNA_11963	BMgn002594	3.943
gRNA_42859	BMgn008457	3.943
gRNA_17839	BMgn003848	3.943
gRNA_42425	BMgn008381	3.943
gRNA_23046	BMgn004878	3.943
gRNA_35708	BMgn007178	3.943
gRNA_90502	BMgn016982	3.943
gRNA_21319	BMgn004568	3.943
gRNA_37732	BMgn007540	3.943
gRNA_87474	BMgn016455	3.943
gRNA_1409	BMgn000308	3.943
gRNA_46588	BMgn009127	3.943
gRNA_6414	BMgn001390	3.943
gRNA_1236	BMgn000272	3.943
gRNA_89004	BMgn016721	3.9423
gRNA_68980	BMgn013180	3.9419
gRNA_28155	BMgn005810	3.9366
gRNA_77908	BMgn014812	3.9354
gRNA_85963	BMgn016191	3.9354
gRNA_40020	BMgn007945	3.9306
gRNA_50678	BMgn009868	3.9269
gRNA_79939	BMgn015158	3.9264
gRNA_46573	BMgn009124	3.9209
gRNA_73059	BMgn013909	3.9182
gRNA_60850	BMgn011707	3.9159
gRNA_33876	BMgn006851	3.9144
gRNA_55570	BMgn010751	3.9144
gRNA_15311	BMgn003309	3.9144
gRNA_63142	BMgn012114	3.914
gRNA_48383	BMgn009459	3.9109
gRNA_3921	BMgn000851	3.9099
gRNA_35298	BMgn007102	3.9094
gRNA_17275	BMgn003725	3.9054
gRNA_86534	BMgn016292	3.9024
gRNA_68346	BMgn013067	3.901
gRNA_75613	BMgn014399	3.8988
gRNA_3441	BMgn000746	3.8962
gRNA_6879	BMgn001492	3.8958
gRNA_3530	BMgn000765	3.8927
gRNA_31081	BMgn006340	3.8923
gRNA_79790	BMgn015133	3.8904
gRNA_26129	BMgn005441	3.8902
gRNA_66845	BMgn012791	3.8902
gRNA_36737	BMgn007367	3.8883
gRNA_61832	BMgn011882	3.8883
gRNA_16688	BMgn003600	3.888
gRNA_37712	BMgn007537	3.8849
gRNA_12088	BMgn002621	3.8846
gRNA_19702	BMgn004267	3.8832
gRNA_65577	BMgn012560	3.8827
gRNA_43700	BMgn008612	3.8803
gRNA_52076	BMgn010136	3.8761
gRNA_67173	BMgn012854	3.8755
gRNA_74257	BMgn014130	3.8752
[truncated: 92,001 more rows]

## Sheet: negative screening in 30 ℃
Gene ID	neg|score	neg|p-value	neg|rank
BMgn008300	3.3122e-06	9.1688e-06	1
BMgn010521	4.6343e-06	1.8021e-05	2
BMgn001072	3.7098e-05	0.00012236	3
BMgn000344	3.7762e-05	0.00012488	4
BMgn008479	7.4195e-05	0.00013121	5
BMgn009662	8.0646e-05	0.00025641	6
BMgn013454	0.000108	0.00034241	7
BMgn009537	0.00012294	0.00038414	8
BMgn007681	0.00013235	0.00041259	9
BMgn012891	0.00016076	0.00015777	10
BMgn015740	0.00016537	0.00063517	11
BMgn012978	0.00018548	0.00057131	12
BMgn000346	0.00023496	0.00022795	13
BMgn007457	0.00025969	0.00025198	14
BMgn005493	0.00027204	0.00054349	15
BMgn014429	0.00028867	0.0011764	16
BMgn008180	0.00032299	0.00095829	17
BMgn002826	0.00033001	0.0010784	18
BMgn011708	0.00033385	0.00099686	19
BMgn007334	0.00033469	0.0010898	20
BMgn015644	0.00034621	0.0011246	21
BMgn010808	0.00034653	0.0012953	22
BMgn008088	0.00040808	0.00041512	23
BMgn003378	0.0004204	0.0008255	24
BMgn007423	0.00047315	0.0009349	25
BMgn003742	0.00052838	0.0015483	26
BMgn010814	0.00053917	0.0015811	27
BMgn011065	0.00055637	0.0016311	28
BMgn006314	0.00062347	0.0018796	29
BMgn012622	0.00064544	0.0018859	30
BMgn013887	0.00064705	0.001265	31
BMgn008770	0.00068113	0.0019808	32
BMgn002414	0.00068285	0.0019833	33
BMgn005738	0.00070492	0.0020465	34
BMgn016134	0.00071558	0.0020737	35
BMgn003394	0.00073203	0.002123	36
BMgn016173	0.00076655	0.0014812	37
BMgn001756	0.00077907	0.0007844	38
BMgn016698	0.0007981	0.0023102	39
BMgn012407	0.00085478	0.0024626	40
BMgn016397	0.00085677	0.0016368	41
BMgn007378	0.00092717	0.0026763	42
BMgn007500	0.0009478	0.0027402	43
BMgn009741	0.00098463	0.0028395	44
BMgn013484	0.0010013	0.0028856	45
BMgn011592	0.0010017	0.00097853	46
BMgn015322	0.0010296	0.0035799	47
BMgn004115	0.0010642	0.0020345	48
BMgn001437	0.0011253	0.0010974	49
BMgn015952	0.0011372	0.0032037	50
BMgn000343	0.0011472	0.0022154	51
BMgn007463	0.001223	0.0023652	52
BMgn016165	0.0012609	0.0024367	53
BMgn017155	0.0012737	0.0012454	54
BMgn005719	0.0012979	0.0037184	55
BMgn012671	0.0012984	0.0012732	56
BMgn012190	0.001318	0.0037797	57
BMgn003023	0.001372	0.0039189	58
BMgn003078	0.0013929	0.0038847	59
BMgn005588	0.0013974	0.0013769	60
BMgn013034	0.0014195	0.0040245	61
BMgn007517	0.0014337	0.003989	62
BMgn007163	0.0014356	0.0039985	63
BMgn013896	0.0014431	0.0027971	64
BMgn011351	0.0014461	0.004106	65
BMgn005285	0.0014592	0.0014338	66
BMgn015988	0.0015015	0.0041566	67
BMgn015615	0.0015081	0.0029349	68
BMgn016156	0.001526	0.0043362	69
BMgn005304	0.0015412	0.0043868	70
BMgn010723	0.0015944	0.0044924	71
BMgn008633	0.0016426	0.0051614	72
BMgn000748	0.0016564	0.0032258	73
BMgn003716	0.0016685	0.004629	74
BMgn009598	0.0017895	0.0049597	75
BMgn006257	0.0018716	0.0049919	76
BMgn011674	0.001945	0.0053909	77
BMgn008462	0.0019649	0.0051595	78
BMgn010144	0.0019973	0.0039151	79
BMgn001464	0.0020265	0.0056116	80
BMgn004211	0.002089	0.0041029	81
BMgn013218	0.0020918	0.006347	82
BMgn016843	0.0021528	0.0042306	83
BMgn002632	0.0021872	0.0055389	84
BMgn006003	0.0021888	0.0021648	85
BMgn000040	0.0021979	0.0055578	86
BMgn001182	0.0022315	0.0043925	87
BMgn008938	0.0023036	0.0057494	88
BMgn008234	0.0023228	0.0064564	89
BMgn015919	0.0023278	0.0057988	90
BMgn006500	0.0023343	0.0045708	91
BMgn007644	0.0023343	0.0045708	92
BMgn016459	0.0023482	0.004603	93
BMgn010533	0.0023496	0.0023254	94
BMgn011376	0.0024282	0.005967	95
BMgn003503	0.0024504	0.0047908	96
BMgn011327	0.0025096	0.0069281	97
BMgn011809	0.0025117	0.0061333	98
BMgn012177	0.0025576	0.0062218	99
BMgn008709	0.0025966	0.0063008	100
BMgn017019	0.0026698	0.0064229	101
BMgn006504	0.0027057	0.0064924	102
BMgn013392	0.0027418	0.007513	103
BMgn010146	0.0027798	0.0066303	104
BMgn006438	0.0027926	0.0066524	105
BMgn011755	0.0028065	0.0076907	106
BMgn007315	0.0028165	0.0077191	107
BMgn011981	0.0028447	0.007814	108
BMgn008665	0.0028624	0.008287	109
BMgn001749	0.0028684	0.0056091	110
BMgn006084	0.0028948	0.0079329	111
BMgn009143	0.0029725	0.0085633	112
BMgn007639	0.0029911	0.0070438	113
BMgn011799	0.0030398	0.0059278	114
BMgn017444	0.0031162	0.0085089	115
BMgn014879	0.0031882	0.0062129	116
BMgn011661	0.0031885	0.0087011	117
BMgn007309	0.0032113	0.0087581	118
BMgn007534	0.0032867	0.0063811	119
BMgn013487	0.0032909	0.0063906	120
BMgn011467	0.0033018	0.00326	121
BMgn005575	0.0033961	0.0096484	122
BMgn011828	0.0034167	0.0092715	123
BMgn013200	0.0034462	0.0078677	124
BMgn015208	0.003447	0.0078709	125
BMgn011561	0.0034532	0.0066929	126
BMgn013800	0.0035321	0.0068434	127
BMgn010332	0.0035424	0.0068573	128
BMgn004328	0.0036323	0.0070236	129
BMgn015993	0.0036569	0.010298	130
BMgn013894	0.0036682	0.0082769	131
BMgn012175	0.0037379	0.0072291	132
BMgn006708	0.0037917	0.0085146	133
BMgn008420	0.0038033	0.01026	134
BMgn017191	0.0039107	0.0075497	135
BMgn007279	0.0039201	0.0038632	136
BMgn015146	0.0039643	0.0088251	137
BMgn009964	0.0039773	0.010708	138
BMgn012756	0.0039884	0.0077065	139
BMgn012713	0.0040383	0.0089718	140
BMgn003089	0.004126	0.007979	141
BMgn013147	0.0041573	0.0080372	142
BMgn012042	0.0041844	0.012647	143
BMgn012184	0.0042261	0.0081637	144
BMgn010603	0.0042357	0.011389	145
BMgn008845	0.0042603	0.0093638	146
BMgn012995	0.0042663	0.0042224	147
BMgn014039	0.0042718	0.011487	148
BMgn008669	0.0043712	0.0095598	149
BMgn012588	0.004453	0.01194	150
BMgn003880	0.0044715	0.0086354	151
BMgn012168	0.0044822	0.0097805	152
BMgn010475	0.0045605	0.0087903	153
BMgn012374	0.0046196	0.008906	154
BMgn015789	0.0046301	0.010048	155
BMgn016976	0.0046646	0.0089971	156
BMgn007185	0.0046936	0.0090641	157
BMgn004660	0.004761	0.004689	158
BMgn009858	0.0047781	0.01031	159
BMgn014463	0.0047844	0.012847	160
BMgn014340	0.0047923	0.0092785	161
BMgn002393	0.0048093	0.0093189	162
BMgn004971	0.0048751	0.013416	163
BMgn008869	0.0048846	0.0048117	164
BMgn002868	0.0048955	0.0094776	165
BMgn002339	0.0049157	0.0095124	166
BMgn007218	0.004926	0.010587	167
BMgn016172	0.0049341	0.0048667	168
BMgn011131	0.0049444	0.013616	169
BMgn000809	0.004997	0.013388	170
BMgn002987	0.0050226	0.0097135	171
BMgn010477	0.0050226	0.0097135	172
BMgn004686	0.0050226	0.0097135	173
BMgn014184	0.0050269	0.010781	174
BMgn017289	0.005033	0.0049704	175
BMgn007756	0.0050506	0.010821	176
BMgn004776	0.0050637	0.0097995	177
BMgn002927	0.0051081	0.013688	178
BMgn014926	0.0051214	0.01408	179
BMgn005236	0.0051823	0.013877	180
BMgn004400	0.0052137	0.010085	181
BMgn001648	0.0052218	0.011163	182
BMgn016718	0.005261	0.010173	183
BMgn001257	0.0053104	0.01025	184
BMgn006724	0.0053545	0.0052954	185
BMgn002606	0.0053696	0.011462	186
BMgn005596	0.005379	0.014386	187
BMgn006208	0.0054193	0.010468	188
BMgn005279	0.0054405	0.014546	189
BMgn016569	0.0054424	0.011585	190
BMgn000885	0.005445	0.01456	191
BMgn016866	0.0054584	0.010535	192
BMgn017186	0.0055175	0.011726	193
BMgn002153	0.0055548	0.010706	194
BMgn016861	0.0055548	0.010706	195
BMgn005600	0.0055914	0.011851	196
BMgn011645	0.0056436	0.011948	197
BMgn015834	0.005705	0.011008	198
BMgn007429	0.0058131	0.012275	199
BMgn015328	0.0058801	0.012391	200
BMgn011012	0.0059184	0.012465	201
BMgn003127	0.005961	0.012536	202
BMgn001338	0.0059832	0.016328	203
BMgn000303	0.0060349	0.012665	204
BMgn013532	0.0061636	0.012899	205
BMgn013168	0.0061681	0.011814	206
BMgn005128	0.0061744	0.015984	207
BMgn012390	0.0061767	0.012926	208
BMgn010595	0.0061876	0.011854	209
BMgn010539	0.0061995	0.012973	210
BMgn002210	0.0062202	0.0061693	211
BMgn004978	0.0062226	0.011929	212
BMgn002543	0.0062585	0.013091	213
BMgn011506	0.0062935	0.01315	214
BMgn004625	0.0062935	0.01315	215
BMgn008781	0.0063461	0.012132	216
BMgn000564	0.0063474	0.013242	217
BMgn017395	0.006354	0.013265	218
BMgn002788	0.0064043	0.013361	219
BMgn014749	0.006418	0.0063735	220
BMgn002045	0.0064782	0.013488	221
BMgn001970	0.0065912	0.0065449	222
BMgn014968	0.0066259	0.013754	223
BMgn006515	0.006627	0.012657	224
BMgn007881	0.0066895	0.016835	225
BMgn015301	0.0068074	0.012982	226
BMgn014145	0.0069407	0.013189	227
BMgn002913	0.0069869	0.0069464	228
BMgn013153	0.006987	0.013275	229
BMgn003080	0.007039	0.014472	230
BMgn003028	0.0070856	0.013447	231
BMgn011880	0.0071566	0.013576	232
BMgn011902	0.0071724	0.0071235	233
BMgn004331	0.0071775	0.013612	234
BMgn016056	0.0071798	0.014738	235
BMgn004092	0.0073728	0.015061	236
BMgn011802	0.0074197	0.0073701	237
BMgn001415	0.0074268	0.018069	238
BMgn012301	0.0074269	0.014073	239
BMgn007138	0.0074383	0.015179	240
BMgn005851	0.0074718	0.014162	241
BMgn014265	0.0075121	0.015317	242
BMgn014394	0.0075371	0.01537	243
BMgn016238	0.0075911	0.015457	244
BMgn016520	0.007603	0.014399	245
BMgn016109	0.0076924	0.018492	246
BMgn012660	0.0077481	0.018589	247
BMgn012151	0.0077536	0.0076957	248
BMgn005024	0.0077631	0.014715	249
BMgn004869	0.0077893	0.014764	250
BMgn010227	0.007803	0.0077432	251
BMgn015383	0.0078926	0.020995	252
BMgn008484	0.0079233	0.014997	253
BMgn001490	0.0079297	0.016087	254
BMgn008000	0.0080218	0.01517	255
BMgn008728	0.0081696	0.01543	256
BMgn012209	0.0082112	0.02179	257
BMgn004498	0.0082387	0.015553	258
BMgn008008	0.0082792	0.016715	259
BMgn012084	0.0083224	0.0082737	260
BMgn010141	0.008368	0.01961	261
BMgn008648	0.0083709	0.022205	262
BMgn003759	0.0084226	0.01698	263
BMgn007486	0.0084422	0.022391	264
BMgn006707	0.0084715	0.017064	265
BMgn013596	0.0085404	0.017183	266
BMgn007159	0.0085574	0.0085051	267
BMgn013455	0.0085939	0.017279	268
BMgn007410	0.0086129	0.016261	269
BMgn017279	0.0086687	0.008617	270
BMgn013768	0.0086928	0.017463	271
BMgn014617	0.0087361	0.016491	272
BMgn016360	0.0087361	0.016491	273
BMgn005703	0.0087923	0.0087397	274
BMgn010273	0.0088772	0.017779	275
BMgn015971	0.0088913	0.008832	276
BMgn005108	0.0089648	0.017954	277
BMgn007058	0.0089648	0.017954	278
BMgn007698	0.0089648	0.017954	279
BMgn015413	0.0090213	0.020739	280
BMgn003372	0.0090396	0.0089851	281
BMgn004942	0.0090396	0.0089851	282
BMgn013906	0.0090455	0.017067	283
BMgn014354	0.009098	0.018187	284
BMgn007730	0.0091021	0.017176	285
BMgn004672	0.0091196	0.02091	286
BMgn009099	0.0092039	0.017368	287
BMgn006159	0.0092091	0.018381	288
BMgn013757	0.0092489	0.017451	289
BMgn000934	0.0092531	0.017455	290
BMgn016504	0.0093204	0.0176	291
BMgn010425	0.0093762	0.017706	292
BMgn004903	0.0094244	0.024761	293
BMgn017058	0.0095471	0.025063	294
BMgn008107	0.0095515	0.021646	295
BMgn002448	0.0095917	0.01906	296
BMgn003775	0.0095977	0.01813	297
BMgn006722	0.0096515	0.019167	298
BMgn015054	0.0096637	0.021823	299
BMgn016890	0.0096716	0.018276	300
BMgn009752	0.0096918	0.018313	301
BMgn012292	0.0097252	0.019305	302
BMgn011963	0.009765	0.018447	303
BMgn017527	0.0097862	0.019424	304
BMgn004995	0.0099015	0.022192	305
BMgn013574	0.0099832	0.019761	306
BMgn004635	0.010041	0.018945	307
BMgn007634	0.010139	0.019126	308
BMgn010681	0.010167	0.020082	309
BMgn014153	0.0102	0.02267	310
BMgn000812	0.010235	0.019295	311
BMgn011852	0.010241	0.020199	312
BMgn016153	0.010298	0.022833	313
BMgn009129	0.010352	0.020405	314
BMgn009704	0.010352	0.020405	315
BMgn016467	0.010361	0.01953	316
BMgn011945	0.010373	0.027083	317
BMgn008030	0.010434	0.019651	318
BMgn006823	0.010508	0.019807	319
BMgn014264	0.010582	0.019934	320
BMgn004680	0.010585	0.010536	321
BMgn001245	0.01061	0.020849	322
BMgn003758	0.010626	0.020022	323
BMgn002279	0.010626	0.020022	324
BMgn006334	0.010626	0.020022	325
BMgn003794	0.010659	0.020941	326
BMgn014472	0.010691	0.023464	327
BMgn002061	0.01073	0.02022	328
BMgn015378	0.010782	0.020325	329
BMgn010560	0.010783	0.010724	330
BMgn010747	0.010794	0.021177	331
BMgn016963	0.010826	0.020407	332
BMgn001716	0.010832	0.023693	333
BMgn015526	0.010877	0.020492	334
BMgn016305	0.01091	0.021406	335
BMgn008222	0.01091	0.021406	336
BMgn010711	0.01091	0.021406	337
BMgn007554	0.01091	0.021406	338
BMgn015259	0.01091	0.021406	339
BMgn016052	0.010944	0.010883	340
BMgn008519	0.010978	0.02152	341
BMgn010908	0.010985	0.023935	342
BMgn010611	0.011051	0.021652	343
BMgn000649	0.011055	0.010992	344
BMgn017115	0.011057	0.021658	345
BMgn002513	0.011083	0.024123	346
BMgn005014	0.011099	0.0209	347
BMgn008874	0.011125	0.021763	348
BMgn016931	0.011156	0.021814	349
BMgn017541	0.011172	0.021035	350
BMgn010430	0.011181	0.024289	351
BMgn000283	0.011182	0.021054	352
BMgn008787	0.011271	0.021238	353
BMgn013319	0.011272	0.022012	354
BMgn006212	0.011282	0.024439	355
BMgn017004	0.011383	0.022202	356
BMgn015292	0.011402	0.011325	357
BMgn002160	0.011452	0.024714	358
BMgn010483	0.011466	0.021622	359
BMgn013311	0.011531	0.024841	360
BMgn015892	0.011664	0.021998	361
BMgn011259	0.011672	0.02507	362
BMgn008299	0.011703	0.025126	363
BMgn005540	0.011788	0.022897	364
BMgn002687	0.011797	0.022911	365
BMgn002007	0.011861	0.022373	366
BMgn014271	0.011929	0.022499	367
BMgn011423	0.011929	0.022499	368
BMgn001980	0.011929	0.022499	369
BMgn002514	0.011936	0.023148	370
BMgn009921	0.012008	0.011926	371
BMgn012929	0.012008	0.02264	372
BMgn016656	0.012056	0.022725	373
BMgn002237	0.012058	0.022727	374
BMgn011524	0.012107	0.022822	375
BMgn011480	0.012131	0.025842	376
BMgn017054	0.012131	0.025842	377
BMgn000784	0.012156	0.022908	378
BMgn005954	0.012156	0.023543	379
BMgn013879	0.012203	0.022999	380
BMgn009451	0.012269	0.026079	381
BMgn016326	0.012377	0.023924	382
BMgn000588	0.012396	0.023959	383
BMgn015310	0.012402	0.023357	384
BMgn017086	0.012402	0.023357	385
BMgn004038	0.012453	0.012367	386
BMgn017028	0.012524	0.024184	387
BMgn013176	0.012597	0.024292	388
BMgn009300	0.012598	0.023723	389
BMgn009766	0.012599	0.02661	390
BMgn010451	0.012621	0.024336	391
BMgn001771	0.012626	0.012531	392
BMgn001270	0.012639	0.024362	393
BMgn003306	0.012644	0.023808	394
BMgn004000	0.012647	0.023814	395
BMgn006273	0.012671	0.024419	396
BMgn007156	0.012682	0.02673	397
BMgn000160	0.012729	0.032824	398
BMgn011600	0.012895	0.024272	399
BMgn011825	0.013058	0.033522	400
BMgn008004	0.013066	0.025118	401
BMgn004577	0.013255	0.024924	402
BMgn003560	0.013255	0.024924	403
BMgn013146	0.013255	0.024924	404
BMgn001400	0.013347	0.025605	405
BMgn006814	0.01336	0.025117	406
BMgn011552	0.013406	0.025705	407
BMgn004184	0.013433	0.027974	408
BMgn013493	0.013436	0.027976	409
BMgn009947	0.013468	0.034175	410
BMgn012971	0.01347	0.025819	411
BMgn016914	0.01348	0.025838	412
BMgn004291	0.013483	0.025235	413
BMgn014032	0.0137	0.026187	414
BMgn009112	0.013827	0.025542	415
BMgn014285	0.013912	0.013794	416
BMgn015279	0.013932	0.034912	417
BMgn009845	0.014023	0.028991	418
BMgn015122	0.014031	0.026753	419
BMgn000087	0.014097	0.029108	420
BMgn011338	0.014121	0.025787	421
BMgn014481	0.014122	0.026936	422
BMgn016098	0.014134	0.014005	423
BMgn004730	0.014142	0.026965	424
BMgn004655	0.014252	0.029376	425
BMgn009262	0.014293	0.02594	426
BMgn013324	0.014366	0.02956	427
BMgn016952	0.014456	0.014338	428
BMgn009466	0.014513	0.027591	429
BMgn010223	0.014522	0.027609	430
BMgn011949	0.014542	0.027651	431
BMgn011841	0.014555	0.014433	432
BMgn012186	0.014752	0.036199	433
BMgn006197	0.014784	0.026341	434
BMgn006328	0.014784	0.026341	435
BMgn002571	0.014802	0.014695	436
BMgn000535	0.01484	0.028155	437
BMgn012652	0.01484	0.028155	438
BMgn007262	0.014904	0.030511	439
BMgn007604	0.014935	0.036482	440
BMgn003222	0.015025	0.014927	441
BMgn014897	0.015057	0.036661	442
BMgn005093	0.015103	0.026649	443
BMgn011330	0.015228	0.028855	444
BMgn012926	0.015272	0.015188	445
BMgn004592	0.015278	0.028924	446
BMgn005270	0.015295	0.031164	447
BMgn006512	0.015546	0.037431	448
BMgn004151	0.015602	0.029509	449
BMgn006221	0.015658	0.029602	450
BMgn015334	0.015668	0.037612	451
BMgn011176	0.01568	0.031827	452
BMgn015205	0.01568	0.031827	453
BMgn003862	0.015692	0.027178	454
BMgn012761	0.015741	0.027229	455
BMgn002285	0.015882	0.032162	456
BMgn013674	0.015889	0.027355	457
BMgn012266	0.016036	0.027474	458
BMgn007842	0.016104	0.03038	459
BMgn002928	0.016125	0.030416	460
BMgn001569	0.016198	0.030558	461
BMgn008369	0.016345	0.030836	462
BMgn003788	0.01637	0.033	463
BMgn016600	0.016379	0.027776	464
BMgn015158	0.016399	0.030934	465
BMgn016806	0.016491	0.031101	466
BMgn007158	0.016534	0.016467	467
BMgn004519	0.016561	0.031216	468
BMgn014131	0.016602	0.031283	469
BMgn010478	0.016674	0.028025	470
BMgn000949	0.016681	0.031414	471
BMgn009107	0.016682	0.033496	472
BMgn006261	0.016932	0.031849	473
BMgn008084	0.017054	0.034107	474
BMgn016470	0.017188	0.032296	475
BMgn008024	0.017251	0.017214	476
BMgn014121	0.017251	0.017214	477
BMgn002067	0.017298	0.032483	478
BMgn001804	0.017343	0.032558	479
BMgn000273	0.01736	0.028641	480
BMgn002789	0.017474	0.034811	481
BMgn008045	0.017507	0.028785	482
BMgn013270	0.01764	0.035072	483
BMgn012566	0.017721	0.017684	484
BMgn010779	0.017742	0.040791	485
BMgn015975	0.017752	0.029005	486
BMgn006645	0.017783	0.033356	487
BMgn016154	0.017812	0.033397	488
BMgn014527	0.017816	0.035365	489
BMgn003841	0.017851	0.029098	490
BMgn008521	0.017885	0.03353	491
BMgn000013	0.017998	0.029217	492
BMgn015938	0.018017	0.017982	493
BMgn002890	0.018107	0.041375	494
BMgn010195	0.018128	0.035875	495
BMgn015351	0.018194	0.029378	496
BMgn000335	0.018228	0.018178	497
BMgn000976	0.018243	0.029421	498
BMgn008223	0.018288	0.034211	499
BMgn017144	0.018292	0.029462	500
BMgn003276	0.018365	0.029532	501
BMgn011824	0.01845	0.018399	502
BMgn005672	0.018488	0.029641	503
BMgn004457	0.018518	0.036527	504
BMgn004046	0.018562	0.018529	505
BMgn010851	0.018683	0.042315	506
BMgn011479	0.018724	0.034998	507
BMgn013322	0.018739	0.036867	508
BMgn001203	0.018764	0.035071	509
BMgn001365	0.018908	0.018887	510
BMgn006304	0.018984	0.035455	511
BMgn008333	0.018986	0.035456	512
BMgn003015	0.019006	0.037304	513
BMgn011026	0.019064	0.047636	514
BMgn003450	0.019069	0.019052	515
BMgn014857	0.019092	0.035626	516
BMgn008265	0.019131	0.035688	517
BMgn011122	0.019132	0.037521	518
BMgn011306	0.019204	0.043114	519
BMgn004108	0.019205	0.019188	520
BMgn003674	0.019223	0.030299	521
BMgn008836	0.019277	0.035934	522
BMgn005384	0.019299	0.035971	523
BMgn004100	0.01935	0.036066	524
BMgn005735	0.019387	0.037987	525
BMgn010044	0.019434	0.038062	526
BMgn017066	0.019468	0.030505	527
BMgn000644	0.019497	0.036324	528
BMgn002365	0.019551	0.019561	529
BMgn009899	0.019552	0.036418	530
BMgn000758	0.01957	0.036448	531
BMgn015576	0.0196	0.019614	532
BMgn003412	0.019649	0.036584	533
BMgn005972	0.019712	0.030726	534
BMgn014118	0.019717	0.036703	535
BMgn010836	0.019768	0.036798	536
BMgn016841	0.019823	0.019833	537
BMgn009660	0.019826	0.036907	538
BMgn015572	0.019867	0.049483	539
BMgn008337	0.019893	0.037026	540
BMgn013201	0.019897	0.0199	541
BMgn012443	0.020167	0.037533	542
BMgn007504	0.020177	0.044599	543
BMgn009210	0.020202	0.031163	544
BMgn004816	0.020273	0.03948	545
BMgn008631	0.020282	0.037746	546
BMgn015544	0.020282	0.037746	547
BMgn010261	0.020349	0.03129	548
BMgn012268	0.020449	0.038058	549
BMgn002434	0.020454	0.020445	550
BMgn016811	0.020496	0.031418	551
BMgn007801	0.020595	0.038328	552
BMgn009250	0.020664	0.045343	553
BMgn001877	0.020716	0.031622	554
BMgn003367	0.020733	0.038581	555
BMgn004218	0.020741	0.038598	556
BMgn011442	0.020961	0.03897	557
BMgn009272	0.021149	0.04088	558
BMgn010297	0.021168	0.046105	559
BMgn001723	0.021168	0.046105	560
BMgn012041	0.02145	0.03226	561
BMgn012730	0.02145	0.03226	562
BMgn009595	0.021455	0.021392	563
BMgn005847	0.021465	0.039851	564
BMgn015421	0.021465	0.039851	565
BMgn005232	0.021546	0.039991	566
BMgn013939	0.021692	0.040251	567
BMgn006600	0.02175	0.041864	568
BMgn002846	0.021838	0.04051	569
BMgn015115	0.021865	0.042036	570
BMgn012365	0.021913	0.021868	571
BMgn000422	0.022049	0.02201	572
BMgn007808	0.022094	0.040969	573
BMgn010133	0.022098	0.022057	574
BMgn006451	0.02216	0.03293	575
BMgn007690	0.022188	0.047654	576
BMgn010382	0.022306	0.03307	577
BMgn012402	0.022317	0.042757	578
BMgn013927	0.022355	0.033121	579
BMgn008208	0.022378	0.047952	580
BMgn011560	0.022404	0.033157	581
BMgn000071	0.022423	0.041533	582
BMgn015746	0.022568	0.02254	583
BMgn001044	0.022679	0.041965	584
BMgn008501	0.022679	0.022649	585
BMgn003132	0.022751	0.042113	586
BMgn007715	0.022751	0.042113	587
BMgn000924	0.022766	0.022734	588
BMgn010818	0.022851	0.043604	589
BMgn014629	0.022862	0.042311	590
BMgn008257	0.022935	0.042424	591
BMgn015584	0.022964	0.022921	592
BMgn000290	0.02304	0.033748	593
BMgn008141	0.023095	0.044001	594
BMgn012043	0.023172	0.042807	595
BMgn002380	0.023333	0.034006	596
BMgn003650	0.023338	0.044416	597
BMgn008905	0.02336	0.023316	598
BMgn014154	0.023409	0.023362	599
BMgn016639	0.023459	0.023407	600
BMgn005746	0.023522	0.043405	601
BMgn010454	0.023551	0.044774	602
BMgn013082	0.023619	0.044882	603
BMgn014448	0.023636	0.044909	604
BMgn014705	0.023724	0.034381	605
BMgn015805	0.023731	0.023665	606
BMgn017520	0.023738	0.043769	607
BMgn002892	0.023738	0.043769	608
BMgn016657	0.023822	0.034457	609
BMgn003997	0.023924	0.044117	610
BMgn007762	0.023924	0.044117	611
BMgn013405	0.023943	0.045386	612
BMgn001564	0.02396	0.045421	613
BMgn010684	0.02403	0.04431	614
BMgn000734	0.024077	0.023982	615
BMgn014812	0.024103	0.044447	616
BMgn012647	0.024115	0.034723	617
BMgn005654	0.024204	0.050765	618
BMgn015415	0.024213	0.044632	619
BMgn006665	0.024329	0.044846	620
BMgn010187	0.024335	0.03491	621
BMgn000042	0.024395	0.044963	622
BMgn014761	0.024411	0.024306	623
BMgn001212	0.024454	0.045078	624
BMgn016255	0.024592	0.045325	625
BMgn001715	0.024614	0.045367	626
BMgn008934	0.02472	0.024617	627
BMgn015387	0.024819	0.024715	628
BMgn001596	0.024908	0.045847	629
BMgn010032	0.024913	0.051789	630
BMgn007032	0.024962	0.047083	631
BMgn012838	0.024962	0.047083	632
BMgn005733	0.024962	0.047083	633
BMgn015604	0.024979	0.045966	634
BMgn011278	0.025017	0.02494	635
BMgn012329	0.025052	0.046116	636
BMgn006729	0.025141	0.035633	637
BMgn006158	0.025187	0.046363	638
BMgn004268	0.025361	0.03582	639
BMgn000480	0.025388	0.025301	640
BMgn011221	0.025462	0.02539	641
BMgn007591	0.025487	0.025409	642
BMgn009860	0.025493	0.046916	643
BMgn009582	0.025519	0.052725	644
BMgn000331	0.025581	0.03604	645
BMgn012314	0.025599	0.047078	646
BMgn005249	0.025645	0.048243	647
BMgn012405	0.025708	0.047252	648
BMgn015309	0.025727	0.036181	649
BMgn003463	0.025734	0.025655	650
BMgn010014	0.025783	0.025706	651
BMgn010427	0.025955	0.047663	652
BMgn012960	0.02602	0.036435	653
BMgn012456	0.026053	0.048918	654
BMgn013264	0.026118	0.036526	655
BMgn009577	0.026146	0.047991	656
BMgn010085	0.026146	0.047991	657
BMgn012539	0.026304	0.04826	658
BMgn011682	0.026313	0.036688	659
BMgn008445	0.026364	0.048366	660
BMgn002971	0.026484	0.03684	661
BMgn003677	0.026484	0.03684	662
BMgn015067	0.026564	0.048713	663
BMgn002733	0.026564	0.048713	664
BMgn003773	0.026875	0.049221	665
BMgn008750	0.026881	0.050286	666
BMgn004763	0.026947	0.037244	667
BMgn013788	0.027057	0.026991	668
BMgn001481	0.027075	0.050595	669
BMgn006827	0.027142	0.037416	670
BMgn013708	0.027191	0.037461	671
BMgn004770	0.027193	0.027132	672
BMgn006213	0.027213	0.055386	673
BMgn011187	0.027268	0.050933	674
BMgn000716	0.027364	0.051075	675
BMgn014989	0.027391	0.027316	676
BMgn002861	0.027405	0.050105	677
BMgn012090	0.027614	0.02755	678
BMgn011744	0.027676	0.050562	679
BMgn000206	0.027679	0.037889	680
BMgn006098	0.027749	0.05069	681
BMgn014913	0.027753	0.051741	682
BMgn012321	0.027843	0.050855	683
BMgn010894	0.027923	0.038106	684
BMgn008065	0.027943	0.051029	685
BMgn013603	0.027984	0.052112	686
BMgn016810	0.02804	0.051199	687
BMgn008494	0.028058	0.052229	688
BMgn013946	0.028069	0.051248	689
BMgn014651	0.02814	0.052359	690
BMgn014020	0.028185	0.051436	691
BMgn005775	0.028191	0.038342	692
BMgn012880	0.028258	0.051568	693
BMgn003422	0.028264	0.0384	694
BMgn004856	0.028302	0.057098	695
BMgn011304	0.02838	0.028305	696
BMgn017599	0.028382	0.05273	697
BMgn016318	0.028404	0.05183	698
BMgn009324	0.028459	0.038567	699
BMgn003106	0.028578	0.02849	700
BMgn004873	0.028586	0.052167	701
BMgn005880	0.028778	0.053338	702
BMgn010489	0.0289	0.028792	703
BMgn003572	0.028915	0.053586	704
BMgn013189	0.028942	0.065632	705
BMgn007325	0.028947	0.038998	706
BMgn016909	0.029053	0.05295	707
BMgn001237	0.029131	0.05308	708
BMgn015688	0.029268	0.058553	709
BMgn005441	0.029271	0.053319	710
BMgn002744	0.02935	0.054323	711
BMgn002823	0.029495	0.05369	712
BMgn010651	0.029688	0.054036	713
BMgn015215	0.029688	0.054036	714
BMgn005211	0.029688	0.054036	715
BMgn011486	0.029688	0.054036	716
BMgn012956	0.029688	0.054036	717
BMgn005460	0.029732	0.054948	718
BMgn004411	0.029786	0.054209	719
BMgn004674	0.029824	0.039796	720
BMgn011006	0.029889	0.029816	721
BMgn000429	0.029932	0.054431	722
BMgn015824	0.030075	0.055542	723
BMgn007054	0.030077	0.054671	724
BMgn014234	0.030109	0.055598	725
BMgn011462	0.030109	0.055598	726
BMgn006459	0.030109	0.055598	727
BMgn017221	0.030109	0.055598	728
BMgn002984	0.030109	0.055598	729
BMgn001081	0.030116	0.040056	730
BMgn003326	0.030149	0.054787	731
BMgn002506	0.030173	0.030092	732
BMgn001807	0.03036	0.04028	733
BMgn003468	0.030419	0.055235	734
BMgn015730	0.030458	0.030346	735
BMgn009127	0.030458	0.030346	736
BMgn015220	0.030506	0.040414	737
BMgn014768	0.03065	0.060655	738
BMgn006931	0.030652	0.040539	739
BMgn010097	0.030701	0.040579	740
BMgn005507	0.030731	0.055755	741
BMgn003395	0.030732	0.05576	742
BMgn007886	0.030742	0.068237	743
BMgn005793	0.030802	0.055873	744
BMgn017065	0.030849	0.056774	745
BMgn015471	0.030858	0.055973	746
BMgn005776	0.030942	0.056139	747
BMgn004393	0.031017	0.040863	748
BMgn016616	0.031017	0.040863	749
BMgn009825	0.031042	0.057084	750
BMgn001886	0.031061	0.056331	751
BMgn017172	0.031101	0.030998	752
BMgn005104	0.031152	0.056479	753
BMgn010637	0.031167	0.056513	754
BMgn013858	0.0312	0.031105	755
BMgn002609	0.03124	0.056647	756
BMgn005552	0.031256	0.057447	757
BMgn011625	0.031261	0.041081	758
BMgn003926	0.031312	0.056754	759
BMgn014082	0.031382	0.04119	760
BMgn004086	0.031447	0.031351	761
BMgn001149	0.03148	0.041284	762
BMgn000654	0.03153	0.057132	763
BMgn005450	0.031565	0.057973	764
BMgn010583	0.031645	0.031558	765
BMgn008832	0.031675	0.057377	766
BMgn010599	0.031772	0.041548	767
BMgn005559	0.031821	0.057616	768
BMgn004156	0.031928	0.057799	769
BMgn001495	0.031942	0.031869	770
BMgn005826	0.031966	0.031897	771
BMgn006012	0.03197	0.057875	772
BMgn009055	0.032015	0.041766	773
BMgn007743	0.032016	0.031947	774
BMgn007872	0.03205	0.058733	775
BMgn007930	0.032064	0.041812	776
BMgn006765	0.032153	0.058912	777
BMgn016625	0.032256	0.058367	778
BMgn009688	0.032355	0.058522	779
BMgn014598	0.032356	0.042087	780
BMgn011055	0.032402	0.0586	781
BMgn004238	0.032453	0.042171	782
BMgn011285	0.03255	0.042258	783
BMgn012169	0.032553	0.063541	784
BMgn012694	0.032587	0.059624	785
BMgn003933	0.03278	0.059932	786
BMgn003433	0.032794	0.042485	787
BMgn004846	0.032794	0.042485	788
BMgn016518	0.032795	0.03276	789
BMgn015522	0.032795	0.03276	790
BMgn003206	0.032795	0.03276	791
BMgn007350	0.032801	0.059284	792
BMgn016445	0.032801	0.059284	793
BMgn006370	0.032801	0.059284	794
BMgn012013	0.032806	0.059289	795
BMgn014544	0.032825	0.063996	796
BMgn010563	0.032885	0.059421	797
BMgn007781	0.032892	0.060106	798
BMgn000913	0.032892	0.060106	799
BMgn014238	0.032956	0.032929	800
BMgn008062	0.032973	0.060231	801
BMgn011700	0.033127	0.059851	802
BMgn008543	0.03318	0.05994	803
BMgn003153	0.033183	0.042836	804
BMgn003676	0.0332	0.059965	805
BMgn001870	0.033228	0.03318	806
BMgn009486	0.033231	0.042881	807
BMgn008446	0.033247	0.064632	808
BMgn010472	0.033277	0.033231	809
BMgn003147	0.033329	0.042983	810
BMgn005794	0.03349	0.060458	811
BMgn015009	0.033562	0.060585	812
BMgn011373	0.033608	0.065151	813
BMgn017581	0.033624	0.061299	814
BMgn005395	0.033635	0.060719	815
BMgn005015	0.033648	0.061336	816
BMgn007445	0.033694	0.060825	817
BMgn016235	0.033724	0.061448	818
BMgn016010	0.033766	0.043353	819
BMgn016249	0.033793	0.061554	820
BMgn000786	0.033871	0.033814	821
BMgn016984	0.033912	0.043486	822
BMgn005218	0.033956	0.061282	823
BMgn012752	0.033985	0.061871	824
BMgn015820	0.034007	0.061367	825
BMgn006386	0.034081	0.073016	826
BMgn008755	0.034143	0.061588	827
BMgn016606	0.034204	0.043747	828
BMgn009936	0.034204	0.043747	829
BMgn003111	0.034204	0.043747	830
BMgn012510	0.034287	0.061838	831
BMgn013861	0.034323	0.062404	832
BMgn009150	0.034327	0.066242	833
BMgn001803	0.034415	0.034348	834
BMgn003189	0.034476	0.062179	835
BMgn009904	0.034539	0.034477	836
BMgn004914	0.034542	0.073677	837
BMgn015256	0.034544	0.044038	838
BMgn015491	0.0346	0.034546	839
BMgn007570	0.03469	0.044158	840
BMgn008992	0.034708	0.063021	841
BMgn002349	0.034712	0.034661	842
BMgn006620	0.034836	0.04428	843
BMgn003195	0.034884	0.044322	844
BMgn002853	0.035009	0.034971	845
BMgn010155	0.035012	0.063091	846
BMgn003545	0.035012	0.063091	847
BMgn005120	0.035012	0.063091	848
BMgn011698	0.035012	0.063091	849
BMgn016342	0.035037	0.063137	850
BMgn001938	0.035206	0.035168	851
BMgn002143	0.035222	0.063473	852
BMgn008745	0.03543	0.063826	853
BMgn000950	0.035443	0.044834	854
BMgn011663	0.035659	0.064566	855
BMgn007691	0.035671	0.064591	856
BMgn016982	0.035713	0.064294	857
BMgn010241	0.035737	0.064335	858
BMgn016316	0.035802	0.064436	859
BMgn006318	0.035807	0.04516	860
BMgn014232	0.035816	0.068577	861
BMgn008950	0.035856	0.045197	862
BMgn003109	0.035881	0.064565	863
BMgn000427	0.035953	0.04529	864
BMgn014411	0.03596	0.065054	865
BMgn008025	0.036072	0.036006	866
BMgn015441	0.036171	0.036107	867
BMgn014867	0.036196	0.045498	868
BMgn006776	0.03628	0.065243	869
BMgn013288	0.036295	0.036218	870
BMgn015501	0.036381	0.036323	871
BMgn005800	0.036393	0.065757	872
BMgn003857	0.036467	0.069541	873
BMgn000859	0.03649	0.065918	874
BMgn003859	0.03656	0.045809	875
BMgn002021	0.036567	0.036519	876
BMgn012952	0.036712	0.065958	877
BMgn009713	0.036712	0.065958	878
BMgn011090	0.03675	0.066021	879
BMgn016300	0.036822	0.066144	880
BMgn010698	0.036876	0.046092	881
BMgn002011	0.036901	0.036823	882
BMgn001523	0.036924	0.046144	883
BMgn016509	0.03697	0.066689	884
BMgn016741	0.03704	0.066485	885
BMgn002875	0.03704	0.066485	886
BMgn015370	0.037046	0.046249	887
BMgn014419	0.037185	0.037117	888
BMgn015764	0.037212	0.070669	889
BMgn001398	0.037215	0.067119	890
BMgn008266	0.037234	0.037173	891
BMgn001801	0.037264	0.046432	892
BMgn016503	0.037293	0.070781	893
BMgn006379	0.037329	0.0667	894
BMgn000341	0.037392	0.0674	895
BMgn003829	0.037546	0.066873	896
BMgn007485	0.037692	0.071383	897
BMgn005064	0.037717	0.037669	898
BMgn006501	0.037787	0.06802	899
BMgn013182	0.037799	0.06709	900
BMgn017455	0.037977	0.068328	901
BMgn005883	0.037989	0.037931	902
BMgn008487	0.037989	0.037931	903
BMgn003182	0.037989	0.037931	904
BMgn005162	0.038137	0.047247	905
BMgn007275	0.038172	0.068636	906
BMgn010248	0.038224	0.038153	907
BMgn008416	0.038331	0.047419	908
BMgn006172	0.038412	0.069	909
BMgn004858	0.038422	0.038333	910
BMgn001778	0.038477	0.047559	911
BMgn007616	0.038525	0.04761	912
BMgn002175	0.038558	0.067701	913
BMgn002358	0.038718	0.038653	914
BMgn001677	0.038748	0.069545	915
BMgn002924	0.038768	0.047836	916
BMgn005722	0.038844	0.069702	917
BMgn006701	0.038854	0.038778	918
BMgn002529	0.038891	0.038823	919
BMgn013991	0.038903	0.073253	920
BMgn003985	0.038962	0.048012	921
BMgn010376	0.039028	0.03896	922
BMgn012505	0.039032	0.06999	923
BMgn002274	0.039059	0.048108	924
BMgn001350	0.039136	0.068161	925
BMgn002453	0.039156	0.048201	926
BMgn013310	0.03925	0.073794	927
BMgn001949	0.039287	0.070392	928
BMgn007242	0.039324	0.070463	929
BMgn005597	0.039461	0.068421	930
BMgn013898	0.039468	0.070708	931
BMgn016738	0.039584	0.039504	932
BMgn001412	0.039628	0.070972	933
BMgn004186	0.039689	0.048695	934
BMgn008210	0.039714	0.068635	935
BMgn001371	0.039738	0.048747	936
BMgn016784	0.039856	0.03977	937
BMgn000453	0.039856	0.03977	938
BMgn004868	0.039859	0.048861	939
BMgn000109	0.039931	0.068781	940
BMgn000626	0.039938	0.071493	941
BMgn001516	0.040075	0.068914	942
BMgn000043	0.040079	0.039992	943
BMgn015983	0.040092	0.07177	944
BMgn003622	0.040099	0.071778	945
BMgn007015	0.040241	0.075307	946
BMgn002715	0.040292	0.06909	947
BMgn013115	0.040364	0.069147	948
BMgn008146	0.040454	0.07234	949
BMgn006128	0.040476	0.072378	950
BMgn009859	0.040489	0.049406	951
BMgn012107	0.040489	0.049406	952
BMgn015806	0.040489	0.049406	953
BMgn015039	0.040489	0.049406	954
BMgn006181	0.040489	0.049406	955
BMgn007306	0.040489	0.049406	956
BMgn001157	0.040489	0.049406	957
BMgn013533	0.04058	0.069327	958
BMgn010240	0.040668	0.072672	959
BMgn005549	0.040767	0.072834	960
BMgn004310	0.040796	0.040707	961
BMgn001747	0.040821	0.072918	962
BMgn000708	0.040833	0.069522	963
BMgn017529	0.040901	0.049798	964
BMgn014311	0.040992	0.076449	965
BMgn010225	0.041003	0.0732	966
BMgn005723	0.041094	0.049968	967
BMgn003421	0.041142	0.041056	968
BMgn004188	0.041288	0.050148	969
BMgn014192	0.041302	0.069892	970
BMgn015480	0.041414	0.041348	971
BMgn007712	0.041439	0.041373	972
BMgn014449	0.041488	0.041418	973
BMgn001160	0.041506	0.050347	974
BMgn008680	0.041518	0.070073	975
BMgn003698	0.041563	0.041492	976
BMgn000154	0.041587	0.041527	977
BMgn005012	0.041643	0.077488	978
BMgn000351	0.041662	0.041614	979
BMgn002720	0.041663	0.070176	980
BMgn011551	0.041711	0.041664	981
BMgn014438	0.041762	0.07766	982
BMgn009225	0.04181	0.041755	983
BMgn005193	0.041879	0.070363	984
BMgn007893	0.041914	0.074657	985
BMgn005226	0.041958	0.04189	986
BMgn011483	0.04199	0.05078	987
BMgn007569	0.042057	0.042	988
BMgn013989	0.042105	0.074967	989
BMgn000276	0.04216	0.050929	990
BMgn017353	0.042227	0.075143	991
BMgn000179	0.04224	0.070658	992
BMgn007068	0.042499	0.051221	993
BMgn006572	0.042502	0.042447	994
BMgn016574	0.042502	0.042447	995
BMgn009415	0.042502	0.042447	996
BMgn013306	0.042547	0.051259	997
BMgn007455	0.042582	0.078965	998
BMgn010812	0.0426	0.07096	999
BMgn005743	0.042689	0.075892	1000
BMgn005207	0.042716	0.051412	1001
BMgn016086	0.0428	0.076065	1002
BMgn006689	0.042871	0.076186	1003
BMgn000791	0.042898	0.042852	1004
BMgn008888	0.042983	0.051654	1005
BMgn009456	0.043158	0.076629	1006
BMgn014554	0.043345	0.051978	1007
BMgn011848	0.043418	0.043394	1008
BMgn007348	0.043465	0.071662	1009
BMgn007597	0.043478	0.080351	1010
BMgn017314	0.043493	0.077161	1011
BMgn010178	0.043566	0.043537	1012
BMgn005038	0.04364	0.043606	1013
BMgn006927	0.04366	0.052263	1014
BMgn008789	0.043665	0.043627	1015
BMgn000302	0.043681	0.07183	1016
BMgn010333	0.043805	0.0524	1017
BMgn001761	0.043897	0.07199	1018
BMgn006699	0.044041	0.072087	1019
BMgn013162	0.044113	0.072153	1020
BMgn012509	0.044144	0.052707	1021
BMgn007436	0.044185	0.07221	1022
BMgn007993	0.044245	0.078332	1023
BMgn002035	0.044337	0.052877	1024
BMgn007985	0.04438	0.078539	1025
BMgn017176	0.044401	0.072383	1026
BMgn010291	0.044689	0.07263	1027
BMgn012408	0.044691	0.044671	1028
BMgn005685	0.044691	0.044671	1029
BMgn005677	0.044691	0.044671	1030
BMgn017313	0.044761	0.072684	1031
BMgn010546	0.044832	0.079235	1032
BMgn001873	0.044845	0.053342	1033
BMgn013105	0.044931	0.079385	1034
BMgn011778	0.044965	0.053445	1035
BMgn010278	0.045048	0.072927	1036
BMgn002001	0.045062	0.053524	1037
BMgn011441	0.045071	0.079588	1038
BMgn011925	0.045093	0.082804	1039
BMgn003298	0.04511	0.053573	1040
BMgn014274	0.045336	0.073156	1041
BMgn013333	0.0454	0.05383	1042
BMgn001805	0.0454	0.05383	1043
BMgn014722	0.045461	0.08336	1044
BMgn005813	0.045516	0.073304	1045
BMgn001118	0.04574	0.080629	1046
BMgn006961	0.045768	0.073498	1047
BMgn010724	0.045829	0.045828	1048
BMgn006840	0.04586	0.054255	1049
BMgn000508	0.04586	0.054255	1050
BMgn012372	0.045867	0.083978	1051
BMgn008830	0.046026	0.081102	1052
BMgn000327	0.046163	0.073801	1053
BMgn001693	0.046163	0.073801	1054
BMgn011499	0.046222	0.054573	1055
BMgn006555	0.046319	0.054652	1056
BMgn008902	0.046398	0.046406	1057
BMgn011317	0.046398	0.046406	1058
BMgn010623	0.04667	0.046685	1059
BMgn004565	0.046771	0.08533	1060
BMgn007088	0.046918	0.074437	1061
BMgn013875	0.046965	0.085597	1062
BMgn011068	0.046981	0.08261	1063
BMgn006214	0.047026	0.074525	1064
BMgn016881	0.047202	0.047225	1065
BMgn011315	0.047284	0.055505	1066
BMgn008587	0.047359	0.083206	1067
BMgn012050	0.047421	0.074851	1068
BMgn014530	0.047458	0.083344	1069
BMgn008341	0.047477	0.055679	1070
BMgn009243	0.04759	0.083562	1071
BMgn004549	0.047767	0.055913	1072
BMgn013286	0.04778	0.075127	1073
BMgn005016	0.047864	0.055982	1074
BMgn016436	0.047869	0.047888	1075
BMgn012497	0.047995	0.075306	1076
BMgn010090	0.048078	0.08434	1077
BMgn001465	0.048078	0.08434	1078
BMgn010529	0.048078	0.08434	1079
BMgn013874	0.048078	0.08434	1080
BMgn011672	0.048226	0.056308	1081
BMgn000292	0.048314	0.048342	1082
BMgn014805	0.048314	0.048342	1083
BMgn010900	0.048507	0.085	1084
BMgn016352	0.048602	0.085148	1085
BMgn015377	0.04876	0.048813	1086
BMgn017588	0.048785	0.075962	1087
BMgn014572	0.048785	0.075962	1088
BMgn003311	0.048925	0.056952	1089
BMgn013280	0.049007	0.04907	1090
BMgn017269	0.049222	0.089014	1091
BMgn001027	0.049364	0.086362	1092
BMgn015238	0.049386	0.089289	1093
BMgn017062	0.049502	0.07657	1094
BMgn007465	0.049646	0.076687	1095
BMgn008279	0.049675	0.04977	1096
BMgn009731	0.049681	0.089756	1097
BMgn001073	0.049712	0.086941	1098
BMgn015483	0.049718	0.076752	1099
BMgn017408	0.049745	0.057729	1100
BMgn017224	0.050023	0.090253	1101
BMgn004048	0.050046	0.050145	1102
BMgn002079	0.050076	0.07702	1103
BMgn001968	0.050179	0.058101	1104
BMgn015625	0.050292	0.090662	1105
BMgn016825	0.050316	0.087903	1106
BMgn006066	0.050349	0.087951	1107
BMgn017247	0.050412	0.088057	1108
BMgn017170	0.050429	0.050495	1109
BMgn009533	0.050429	0.050495	1110
BMgn005019	0.050546	0.091029	1111
BMgn010523	0.050565	0.058434	1112
BMgn007986	0.050697	0.088497	1113
BMgn012351	0.050757	0.058607	1114
BMgn001910	0.050788	0.050849	1115
BMgn014645	0.050936	0.050993	1116
BMgn013204	0.051035	0.051097	1117
BMgn001844	0.051143	0.058952	1118
BMgn006264	0.051282	0.051354	1119
BMgn010338	0.051336	0.059131	1120
BMgn014537	0.051363	0.08955	1121
BMgn016345	0.051384	0.059168	1122
BMgn013605	0.051395	0.089606	1123
BMgn000286	0.051406	0.051481	1124
BMgn010532	0.051455	0.051539	1125
BMgn009714	0.05148	0.059252	1126
BMgn016420	0.051629	0.051724	1127
BMgn006450	0.051678	0.051769	1128
BMgn003585	0.051743	0.090151	1129
BMgn009370	0.051818	0.093004	1130
BMgn015272	0.051826	0.051905	1131
BMgn002052	0.051925	0.051998	1132
BMgn001171	0.051933	0.090417	1133
BMgn013707	0.051938	0.059655	1134
BMgn003962	0.052024	0.052094	1135
BMgn015622	0.052099	0.052171	1136
BMgn004449	0.052266	0.090958	1137
BMgn006957	0.05254	0.060193	1138
BMgn008063	0.052691	0.079125	1139
BMgn010112	0.052691	0.079125	1140
BMgn001712	0.052691	0.079125	1141
BMgn017296	0.052732	0.060369	1142
BMgn007540	0.052766	0.094388	1143
BMgn017051	0.052766	0.094388	1144
BMgn008670	0.052829	0.060463	1145
BMgn012199	0.052973	0.060584	1146
BMgn007671	0.052989	0.053047	1147
BMgn003214	0.052989	0.053047	1148
BMgn015869	0.052989	0.053047	1149
BMgn004131	0.052989	0.053047	1150
BMgn002309	0.052989	0.053047	1151
BMgn017141	0.052989	0.053047	1152
BMgn012942	0.052989	0.053047	1153
BMgn004601	0.053149	0.092369	1154
BMgn014124	0.053156	0.079484	1155
BMgn013598	0.053382	0.060961	1156
BMgn002563	0.053382	0.060961	1157
BMgn001226	0.05344	0.092817	1158
BMgn015804	0.053513	0.092927	1159
BMgn014880	0.053585	0.079856	1160
BMgn006384	0.053833	0.093463	1161
BMgn004292	0.053871	0.080078	1162
BMgn014977	0.053943	0.080134	1163
BMgn014785	0.054072	0.093831	1164
BMgn003990	0.054176	0.061719	1165
BMgn010991	0.054176	0.061719	1166
BMgn013122	0.054201	0.054205	1167
BMgn014040	0.054336	0.080468	1168
BMgn008163	0.054336	0.080468	1169
BMgn014103	0.054336	0.080468	1170
BMgn013121	0.054336	0.080468	1171
BMgn016395	0.054487	0.094536	1172
BMgn017492	0.054547	0.05453	1173
BMgn000892	0.054596	0.054573	1174
BMgn007069	0.054609	0.062119	1175
BMgn007266	0.054657	0.062171	1176
BMgn003789	0.054753	0.062261	1177
BMgn000250	0.054794	0.054776	1178
BMgn008433	0.054844	0.054816	1179
BMgn008236	0.054876	0.095143	1180
BMgn005473	0.054943	0.054903	1181
BMgn015831	0.055162	0.062644	1182
BMgn009135	0.055229	0.081225	1183
BMgn008523	0.055256	0.095721	1184
BMgn002455	0.055264	0.055242	1185
BMgn010265	0.055289	0.055261	1186
BMgn003426	0.055334	0.095837	1187
BMgn010403	0.055334	0.095837	1188
BMgn003734	0.055443	0.081399	1189
BMgn001865	0.05545	0.062895	1190
BMgn001731	0.05545	0.062895	1191
BMgn007658	0.055586	0.081505	1192
BMgn013792	0.055709	0.055657	1193
BMgn001940	0.056003	0.063392	1194
BMgn009897	0.056051	0.063433	1195
BMgn015956	0.056062	0.096987	1196
BMgn000222	0.056122	0.081907	1197
BMgn011547	0.056122	0.081907	1198
BMgn009538	0.056203	0.097198	1199
BMgn005068	0.056204	0.056149	1200
BMgn012617	0.056278	0.056223	1201
BMgn002695	0.056278	0.056223	1202
BMgn014990	0.056298	0.097352	1203
BMgn002622	0.056484	0.063837	1204
BMgn004595	0.056649	0.056596	1205
BMgn011223	0.056729	0.082398	1206
BMgn006844	0.05675	0.1005	1207
BMgn013928	0.056772	0.098112	1208
BMgn012007	0.0568	0.082447	1209
BMgn000862	0.056871	0.082506	1210
BMgn012563	0.057014	0.082615	1211
BMgn003514	0.05702	0.056989	1212
BMgn004117	0.057045	0.05701	1213
BMgn001409	0.05706	0.064372	1214
BMgn006097	0.057085	0.082677	1215
BMgn002645	0.057105	0.098639	1216
BMgn007318	0.05713	0.098679	1217
BMgn001020	0.05715	0.098709	1218
BMgn003889	0.057156	0.064447	1219
BMgn014372	0.057292	0.098935	1220
BMgn009180	0.0573	0.06457	1221
BMgn008003	0.057434	0.099136	1222
BMgn006826	0.057554	0.099309	1223
BMgn012159	0.057637	0.064903	1224
BMgn002986	0.058021	0.065232	1225
BMgn012843	0.058021	0.065232	1226
BMgn011398	0.058021	0.065232	1227
BMgn016378	0.058056	0.1001	1228
BMgn002677	0.058059	0.058055	1229
BMgn014427	0.058155	0.083556	1230
BMgn000502	0.058183	0.058176	1231
BMgn004890	0.058231	0.10038	1232
BMgn014846	0.058262	0.10728	1233
BMgn006558	0.058332	0.10055	1234
BMgn002375	0.058609	0.10099	1235
BMgn017032	0.058659	0.10108	1236
BMgn004974	0.058764	0.05874	1237
BMgn009173	0.058764	0.05874	1238
BMgn008809	0.058912	0.10147	1239
BMgn004661	0.059005	0.066103	1240
BMgn016612	0.05919	0.10194	1241
BMgn012364	0.059295	0.084458	1242
BMgn014665	0.059345	0.059332	1243
BMgn006709	0.059367	0.084528	1244
BMgn008896	0.059432	0.05943	1245
BMgn012711	0.059642	0.05964	1246
BMgn009850	0.059722	0.1028	1247
BMgn003646	0.059732	0.10507	1248
BMgn005008	0.059732	0.10507	1249
BMgn015673	0.059889	0.05991	1250
BMgn000849	0.059988	0.066964	1251
BMgn007492	0.059988	0.066964	1252
BMgn003684	0.059988	0.066964	1253
BMgn011979	0.060114	0.085137	1254
BMgn017332	0.060114	0.085137	1255
BMgn004739	0.06031	0.060328	1256
BMgn009519	0.060396	0.067338	1257
BMgn006839	0.060423	0.10392	1258
BMgn016424	0.060433	0.060446	1259
BMgn003196	0.060582	0.060605	1260
BMgn010557	0.060611	0.06754	1261
BMgn015605	0.060804	0.060826	1262
BMgn000085	0.061043	0.067899	1263
BMgn014576	0.061072	0.10495	1264
BMgn006034	0.061146	0.085955	1265
BMgn003435	0.061163	0.067994	1266
BMgn004832	0.061202	0.10731	1267
BMgn009806	0.061217	0.086008	1268
BMgn002209	0.061225	0.061244	1269
BMgn015219	0.061282	0.068118	1270
BMgn015319	0.061498	0.10773	1271
BMgn003191	0.061502	0.086226	1272
BMgn000041	0.061544	0.10568	1273
BMgn006993	0.06157	0.068399	1274
BMgn011137	0.061575	0.10573	1275
BMgn016750	0.061575	0.10573	1276
BMgn013542	0.061575	0.10573	1277
BMgn002786	0.061583	0.06158	1278
BMgn012361	0.061686	0.10589	1279
BMgn015864	0.061714	0.068527	1280
BMgn005536	0.061857	0.068651	1281
BMgn009082	0.061857	0.086522	1282
BMgn011136	0.061874	0.10618	1283
BMgn002738	0.061952	0.10842	1284
BMgn003437	0.062115	0.062099	1285
BMgn008786	0.062201	0.10878	1286
BMgn014891	0.062204	0.10673	1287
BMgn007416	0.062233	0.10677	1288
BMgn005929	0.062288	0.069061	1289
BMgn012418	0.062288	0.069061	1290
BMgn013979	0.06232	0.0869	1291
BMgn015823	0.06232	0.0869	1292
BMgn000196	0.062336	0.10695	1293
BMgn007838	0.062461	0.062462	1294
BMgn013846	0.062595	0.10735	1295
BMgn003115	0.062624	0.069374	1296
BMgn006820	0.062659	0.062636	1297
BMgn005864	0.062672	0.069419	1298
BMgn005310	0.062817	0.10771	1299
BMgn010214	0.062853	0.087314	1300
BMgn016421	0.062924	0.087373	1301
BMgn015347	0.062929	0.10988	1302
BMgn003803	0.062959	0.069691	1303
BMgn006986	0.063104	0.0631	1304
BMgn015854	0.063222	0.069933	1305
BMgn011597	0.063258	0.11039	1306
BMgn002206	0.063364	0.06336	1307
BMgn008889	0.063374	0.10862	1308
BMgn011838	0.063486	0.070159	1309
BMgn011132	0.063492	0.087821	1310
BMgn009589	0.06355	0.063563	1311
BMgn011170	0.063571	0.10892	1312
BMgn016604	0.063624	0.063642	1313
BMgn010960	0.063821	0.070471	1314
BMgn002638	0.064052	0.10972	1315
BMgn007452	0.064108	0.070719	1316
BMgn006773	0.064251	0.070843	1317
BMgn017199	0.064308	0.088435	1318
BMgn014888	0.064308	0.088435	1319
BMgn000134	0.064514	0.071099	1320
BMgn013226	0.064514	0.071099	1321
BMgn007294	0.064654	0.11071	1322
BMgn004551	0.064707	0.11079	1323
BMgn013371	0.064917	0.11112	1324
BMgn002504	0.064969	0.071525	1325
BMgn013002	0.065124	0.089114	1326
BMgn012699	0.06516	0.071696	1327
BMgn013073	0.065171	0.11155	1328
BMgn001742	0.065195	0.089176	1329
BMgn005233	0.065256	0.071782	1330
BMgn008268	0.065259	0.1117	1331
BMgn006489	0.065266	0.089241	1332
BMgn012569	0.065837	0.065886	1333
BMgn004344	0.066017	0.1129	1334
BMgn016696	0.066021	0.072481	1335
BMgn012226	0.066111	0.11305	1336
BMgn005043	0.066188	0.072617	1337
BMgn009388	0.066245	0.066317	1338
BMgn012973	0.066299	0.11335	1339
BMgn006123	0.066328	0.11493	1340
BMgn008033	0.066507	0.090289	1341
BMgn006680	0.066515	0.1137	1342
BMgn015154	0.066594	0.072988	1343
BMgn008898	0.066594	0.072988	1344
BMgn008578	0.066715	0.066792	1345
BMgn014233	0.06674	0.11406	1346
BMgn014218	0.066829	0.11567	1347
BMgn001997	0.066881	0.073247	1348
BMgn016572	0.06706	0.11457	1349
BMgn015212	0.067072	0.073433	1350
BMgn000114	0.067238	0.11486	1351
BMgn001768	0.067238	0.11486	1352
BMgn013251	0.067238	0.11486	1353
BMgn001519	0.067322	0.09097	1354
BMgn002639	0.067322	0.09097	1355
BMgn012054	0.067417	0.11654	1356
BMgn001859	0.067531	0.067558	1357
BMgn001345	0.067531	0.067558	1358
BMgn012499	0.067534	0.1167	1359
BMgn010215	0.067676	0.091243	1360
BMgn007324	0.067747	0.091298	1361
BMgn006497	0.067818	0.091355	1362
BMgn010992	0.067847	0.11582	1363
BMgn010897	0.067895	0.1159	1364
BMgn006415	0.06797	0.11733	1365
BMgn003496	0.068038	0.068061	1366
BMgn009611	0.068509	0.11814	1367
BMgn011679	0.068593	0.11826	1368
BMgn002904	0.068808	0.092143	1369
BMgn003487	0.068833	0.11704	1370
BMgn005312	0.068839	0.075087	1371
BMgn001982	0.068892	0.068903	1372
BMgn006892	0.068935	0.075178	1373
BMgn006879	0.068995	0.11887	1374
BMgn004563	0.06925	0.069273	1375
BMgn008652	0.069269	0.075487	1376
BMgn005021	0.069287	0.1193	1377
BMgn014399	0.069317	0.12284	1378
BMgn007204	0.069364	0.07557	1379
BMgn003091	0.069516	0.092744	1380
BMgn014948	0.069516	0.092744	1381
BMgn011567	0.069516	0.092744	1382
BMgn004173	0.069516	0.092744	1383
BMgn015339	0.069516	0.092744	1384
BMgn000805	0.06963	0.11762	1385
BMgn010956	0.06963	0.11762	1386
BMgn016608	0.069722	0.075898	1387
BMgn016495	0.069881	0.069884	1388
BMgn008284	0.06994	0.093073	1389
BMgn005973	0.070011	0.093127	1390
BMgn003053	0.070104	0.12049	1391
BMgn009350	0.070223	0.093288	1392
BMgn004983	0.070337	0.12087	1393
BMgn011731	0.070359	0.12089	1394
BMgn003694	0.07039	0.076528	1395
BMgn005838	0.070435	0.093465	1396
BMgn015022	0.07052	0.11828	1397
BMgn005959	0.070581	0.0767	1398
BMgn013142	0.070676	0.076785	1399
BMgn001156	0.07087	0.070859	1400
BMgn002402	0.07087	0.070859	1401
BMgn003033	0.07087	0.070859	1402
BMgn002195	0.07087	0.070859	1403
BMgn003916	0.07087	0.070859	1404
BMgn008159	0.071	0.093928	1405
BMgn002404	0.071071	0.093981	1406
BMgn002053	0.071081	0.07714	1407
BMgn015326	0.071095	0.12197	1408
BMgn007831	0.071141	0.094039	1409
BMgn005094	0.071212	0.09409	1410
BMgn002046	0.071367	0.077423	1411
BMgn009077	0.071459	0.094303	1412
BMgn008593	0.071561	0.12267	1413
BMgn010356	0.071653	0.077697	1414
BMgn016400	0.071701	0.077745	1415
BMgn001366	0.071706	0.094505	1416
BMgn010598	0.071844	0.077853	1417
BMgn015737	0.071918	0.094678	1418
BMgn005828	0.072058	0.078059	1419
BMgn003782	0.072058	0.078059	1420
BMgn001422	0.072132	0.072105	1421
BMgn011279	0.072271	0.094981	1422
BMgn009721	0.072273	0.078249	1423
BMgn006474	0.07228	0.072261	1424
BMgn001048	0.072553	0.095238	1425
BMgn004651	0.072559	0.078498	1426
BMgn007278	0.072589	0.12419	1427
BMgn013044	0.072589	0.12419	1428
BMgn003652	0.072606	0.078544	1429
BMgn000894	0.072654	0.078592	1430
BMgn008398	0.072749	0.078669	1431
BMgn004888	0.072799	0.072789	1432
BMgn008312	0.07294	0.078849	1433
BMgn006006	0.073047	0.095621	1434
BMgn016820	0.073118	0.095673	1435
BMgn014236	0.073125	0.125	1436
BMgn015263	0.07325	0.12519	1437
BMgn012487	0.073418	0.073388	1438
BMgn007490	0.073463	0.079327	1439
BMgn012220	0.073682	0.096151	1440
BMgn010946	0.073682	0.096151	1441
BMgn015618	0.073682	0.096151	1442
BMgn001362	0.073682	0.096151	1443
BMgn008960	0.073682	0.096151	1444
BMgn008746	0.073682	0.096151	1445
BMgn006573	0.073682	0.096151	1446
BMgn015780	0.07369	0.073677	1447
BMgn013407	0.073715	0.12586	1448
BMgn008861	0.073838	0.073811	1449
BMgn008264	0.073844	0.079656	1450
BMgn002973	0.073939	0.079748	1451
BMgn013975	0.073993	0.12626	1452
BMgn005643	0.074011	0.079801	1453
BMgn011154	0.074061	0.074042	1454
BMgn014412	0.07412	0.12089	1455
BMgn014357	0.074175	0.096549	1456
BMgn011218	0.074296	0.12671	1457
BMgn012458	0.074531	0.074515	1458
BMgn000865	0.074534	0.080277	1459
BMgn015887	0.074534	0.080277	1460
BMgn017474	0.074534	0.080277	1461
BMgn012943	0.074534	0.080277	1462
BMgn009907	0.074598	0.096901	1463
BMgn004126	0.074669	0.096961	1464
BMgn008840	0.074739	0.097031	1465
BMgn006528	0.074809	0.097084	1466
BMgn001324	0.074951	0.074922	1467
BMgn000740	0.074986	0.097216	1468
BMgn005264	0.074986	0.097216	1469
BMgn010410	0.075025	0.075005	1470
BMgn017138	0.075091	0.0973	1471
BMgn000246	0.075224	0.08093	1472
BMgn007637	0.075226	0.12814	1473
BMgn016794	0.075303	0.097477	1474
BMgn005555	0.075479	0.097636	1475
BMgn002219	0.075557	0.08126	1476
BMgn003148	0.075655	0.097797	1477
BMgn015299	0.075847	0.12221	1478
BMgn005609	0.075866	0.097975	1479
BMgn015569	0.07594	0.075934	1480
BMgn006293	0.07602	0.1293	1481
BMgn009338	0.076347	0.13269	1482
BMgn003094	0.076406	0.12264	1483
BMgn003751	0.076406	0.12264	1484
BMgn008947	0.076461	0.082128	1485
BMgn014551	0.076499	0.098514	1486
BMgn013736	0.076532	0.082192	1487
BMgn010568	0.076603	0.082248	1488
BMgn014947	0.076651	0.08229	1489
BMgn014388	0.076746	0.082372	1490
BMgn017214	0.076757	0.076786	1491
BMgn005267	0.076779	0.12288	1492
BMgn002751	0.076781	0.098748	1493
BMgn016553	0.076793	0.082407	1494
BMgn014663	0.076818	0.076845	1495
BMgn006973	0.076886	0.098832	1496
BMgn003658	0.076954	0.077002	1497
BMgn002540	0.076983	0.082591	1498
BMgn008362	0.077105	0.12311	1499
BMgn016112	0.077132	0.099044	1500
BMgn016702	0.077221	0.082786	1501
BMgn009715	0.077273	0.099169	1502
BMgn012742	0.077301	0.077331	1503
BMgn004381	0.077315	0.13125	1504
BMgn011202	0.077325	0.077359	1505
BMgn015969	0.077338	0.12328	1506
BMgn017372	0.077343	0.099243	1507
BMgn014811	0.077365	0.13411	1508
BMgn003629	0.077484	0.099353	1509
BMgn000122	0.077554	0.09941	1510
BMgn000267	0.077598	0.077644	1511
BMgn011099	0.077625	0.099476	1512
BMgn005573	0.07771	0.12354	1513
BMgn016554	0.077835	0.099664	1514
BMgn010301	0.077906	0.099718	1515
BMgn012142	0.077976	0.09978	1516
BMgn004078	0.078092	0.078159	1517
BMgn008936	0.078092	0.078159	1518
BMgn003273	0.078117	0.099907	1519
BMgn017232	0.078124	0.083617	1520
BMgn006265	0.078124	0.083617	1521
BMgn008287	0.078124	0.083617	1522
BMgn016892	0.078124	0.083617	1523
BMgn005695	0.078129	0.12384	1524
BMgn014992	0.078257	0.10003	1525
BMgn014545	0.078327	0.10008	1526
BMgn014536	0.078474	0.13291	1527
BMgn015609	0.078646	0.0841	1528
BMgn001561	0.078693	0.084147	1529
BMgn009073	0.078735	0.078809	1530
BMgn004129	0.078744	0.13332	1531
BMgn001015	0.078955	0.084422	1532
BMgn000884	0.078995	0.10067	1533
BMgn014050	0.079053	0.13376	1534
BMgn004880	0.079121	0.08455	1535
BMgn011759	0.079279	0.079377	1536
BMgn008412	0.079311	0.10093	1537
BMgn004699	0.079338	0.12472	1538
BMgn000554	0.079338	0.12472	1539
BMgn012514	0.079338	0.12472	1540
BMgn004277	0.079358	0.084768	1541
BMgn005631	0.079451	0.10104	1542
BMgn003133	0.079477	0.079591	1543
BMgn010383	0.0795	0.084904	1544
BMgn001942	0.07965	0.07975	1545
BMgn013512	0.079662	0.10122	1546
BMgn010634	0.079714	0.085091	1547
BMgn000223	0.079972	0.080059	1548
BMgn012886	0.079979	0.13518	1549
BMgn011041	0.080013	0.10151	1550
BMgn001417	0.08007	0.085413	1551
BMgn008598	0.080071	0.080154	1552
BMgn001083	0.080194	0.080271	1553
BMgn009683	0.080221	0.12536	1554
BMgn016671	0.080294	0.10175	1555
BMgn008708	0.080354	0.085679	1556
BMgn012004	0.080354	0.085679	1557
BMgn003093	0.080364	0.1018	1558
BMgn001368	0.080434	0.10186	1559
BMgn007495	0.080504	0.10193	1560
BMgn014315	0.080593	0.12563	1561
BMgn004555	0.080666	0.13879	1562
BMgn011004	0.080686	0.085985	1563
BMgn002737	0.080715	0.10209	1564
BMgn001146	0.080862	0.080928	1565
BMgn006469	0.080924	0.086206	1566
BMgn016123	0.080936	0.081005	1567
BMgn016705	0.080964	0.12589	1568
BMgn011125	0.080995	0.086271	1569
BMgn008077	0.081065	0.10237	1570
BMgn009940	0.081135	0.10243	1571
BMgn013366	0.081416	0.10267	1572
BMgn007974	0.081486	0.10273	1573
BMgn012609	0.08153	0.081589	1574
BMgn008157	0.081597	0.13765	1575
BMgn008843	0.081703	0.081754	1576
BMgn005933	0.081876	0.081923	1577
BMgn007055	0.081919	0.087141	1578
BMgn014693	0.082074	0.082124	1579
BMgn011255	0.082109	0.087323	1580
BMgn005053	0.082275	0.087468	1581
BMgn009831	0.082327	0.1034	1582
BMgn006534	0.082393	0.087581	1583
BMgn015354	0.082507	0.082534	1584
BMgn008066	0.082507	0.082534	1585
BMgn003534	0.082507	0.082534	1586
BMgn006647	0.082606	0.1392	1587
BMgn007024	0.082642	0.10366	1588
BMgn010196	0.082727	0.12718	1589
BMgn000368	0.083198	0.088304	1590
BMgn008654	0.083198	0.088304	1591
BMgn004176	0.083198	0.088304	1592
BMgn007260	0.083329	0.14028	1593
BMgn012179	0.08341	0.083412	1594
BMgn011777	0.083459	0.083461	1595
BMgn008834	0.083469	0.12771	1596
BMgn001163	0.083484	0.083486	1597
BMgn006464	0.083731	0.083733	1598
BMgn008807	0.083756	0.083755	1599
BMgn009428	0.083814	0.088875	1600
BMgn011024	0.08384	0.12799	1601
BMgn003088	0.083861	0.08892	1602
BMgn013345	0.083892	0.083889	1603
BMgn004538	0.083929	0.08392	1604
BMgn015611	0.084226	0.084214	1605
BMgn005478	0.08424	0.08926	1606
BMgn005287	0.084287	0.089309	1607
BMgn004307	0.084761	0.08975	1608
BMgn007527	0.084777	0.10541	1609
BMgn012067	0.084812	0.1287	1610
BMgn009747	0.084812	0.1287	1611
BMgn008901	0.08495	0.089908	1612
BMgn000270	0.085045	0.089983	1613
BMgn005141	0.085057	0.10565	1614
BMgn001232	0.085092	0.090033	1615
BMgn012277	0.085173	0.14308	1616
BMgn004959	0.085281	0.090201	1617
BMgn005731	0.085289	0.085255	1618
BMgn014018	0.085337	0.10586	1619
BMgn007785	0.085707	0.090594	1620
BMgn016912	0.085756	0.1062	1621
BMgn011232	0.085846	0.085809	1622
BMgn001110	0.085932	0.085893	1623
BMgn012905	0.085991	0.090854	1624
BMgn015392	0.086002	0.14431	1625
BMgn009795	0.086002	0.14431	1626
BMgn001706	0.086245	0.1066	1627
BMgn001085	0.08635	0.10668	1628
BMgn010652	0.086664	0.10695	1629
BMgn006152	0.086734	0.107	1630
BMgn000541	0.086801	0.13015	1631
BMgn017308	0.086842	0.091648	1632
BMgn004949	0.086874	0.1071	1633
BMgn013619	0.086939	0.13026	1634
BMgn003748	0.086944	0.10716	1635
BMgn001536	0.087157	0.087134	1636
BMgn012852	0.087157	0.087134	1637
BMgn011685	0.087157	0.087134	1638
BMgn016973	0.08717	0.13041	1639
BMgn007913	0.087385	0.092163	1640
BMgn004066	0.087401	0.13058	1641
BMgn002221	0.087502	0.10762	1642
BMgn001887	0.087678	0.13076	1643
BMgn015126	0.087928	0.09269	1644
BMgn000973	0.087991	0.10803	1645
BMgn007514	0.088212	0.092942	1646
BMgn011992	0.088406	0.088368	1647
BMgn004899	0.088455	0.088417	1648
BMgn014127	0.088613	0.093338	1649
BMgn016223	0.088613	0.093338	1650
BMgn013775	0.088619	0.10854	1651
BMgn002534	0.088619	0.10854	1652
BMgn012667	0.088619	0.10854	1653
BMgn010551	0.088619	0.10854	1654
BMgn011733	0.088619	0.10854	1655
BMgn007255	0.088619	0.10854	1656
BMgn012319	0.088619	0.10854	1657
BMgn001150	0.088619	0.10854	1658
BMgn002520	0.088702	0.088672	1659
BMgn001137	0.088731	0.093458	1660
BMgn005390	0.08874	0.13155	1661
BMgn006954	0.08874	0.13155	1662
BMgn001403	0.088752	0.088724	1663
BMgn016768	0.088826	0.093536	1664
BMgn011923	0.088909	0.14864	1665
BMgn002395	0.089109	0.093785	1666
BMgn002652	0.089211	0.10901	1667
BMgn001541	0.089392	0.094062	1668
BMgn011069	0.08944	0.094113	1669
BMgn011198	0.089487	0.094164	1670
BMgn003905	0.089978	0.10965	1671
BMgn003338	0.090082	0.10972	1672
BMgn000919	0.090236	0.090238	1673
BMgn008693	0.090402	0.1509	1674
BMgn017488	0.09064	0.1102	1675
BMgn005751	0.090643	0.095264	1676
BMgn005779	0.090768	0.13303	1677
BMgn004582	0.090777	0.15147	1678
BMgn000525	0.090849	0.11038	1679
BMgn005913	0.090852	0.15156	1680
BMgn004372	0.091058	0.11056	1681
BMgn005439	0.091077	0.091102	1682
BMgn016094	0.091136	0.13331	1683
BMgn006327	0.091146	0.15197	1684
BMgn015316	0.091497	0.091514	1685
BMgn016916	0.091545	0.11094	1686
BMgn003181	0.091547	0.091563	1687
BMgn008823	0.091645	0.091664	1688
BMgn010048	0.091775	0.15288	1689
BMgn000753	0.091775	0.15288	1690
BMgn001733	0.091962	0.1113	1691
BMgn016339	0.091962	0.1113	1692
BMgn014359	0.092057	0.13398	1693
BMgn004004	0.092177	0.092182	1694
BMgn007852	0.092177	0.092182	1695
BMgn017174	0.092177	0.092182	1696
BMgn007988	0.092316	0.096779	1697
BMgn001637	0.092387	0.09684	1698
BMgn006167	0.092472	0.15391	1699
BMgn011741	0.092519	0.15398	1700
BMgn007476	0.092646	0.097087	1701
BMgn001086	0.092788	0.097225	1702
BMgn012315	0.09303	0.093023	1703
BMgn007038	0.093069	0.13474	1704
BMgn014108	0.093075	0.11221	1705
BMgn015410	0.093161	0.13481	1706
BMgn001670	0.093188	0.097606	1707
BMgn011664	0.093278	0.09326	1708
BMgn017035	0.093318	0.11241	1709
BMgn006198	0.093329	0.09773	1710
BMgn015252	0.093329	0.09773	1711
BMgn010701	0.093329	0.09773	1712
BMgn000695	0.093377	0.093362	1713
BMgn005143	0.093426	0.093408	1714
BMgn002145	0.093492	0.11257	1715
BMgn002303	0.093562	0.11264	1716
BMgn001445	0.093636	0.098018	1717
BMgn009695	0.09373	0.098117	1718
BMgn010132	0.093785	0.09378	1719
BMgn007894	0.093835	0.15598	1720
BMgn014588	0.093874	0.11288	1721
BMgn006642	0.093884	0.093864	1722
BMgn014335	0.093944	0.15746	1723
BMgn006821	0.09397	0.09396	1724
BMgn012511	0.094048	0.11302	1725
BMgn015878	0.094094	0.094088	1726
BMgn011254	0.094126	0.13552	1727
BMgn012236	0.094126	0.13552	1728
BMgn017419	0.094295	0.098635	1729
BMgn003007	0.094295	0.098635	1730
BMgn005256	0.094295	0.098635	1731
BMgn010609	0.094366	0.094376	1732
BMgn009495	0.094371	0.15811	1733
BMgn009591	0.094395	0.11329	1734
BMgn003796	0.09444	0.094456	1735
BMgn008036	0.094465	0.11334	1736
BMgn007972	0.094534	0.11339	1737
BMgn016782	0.094762	0.094772	1738
BMgn007152	0.094812	0.15877	1739
BMgn002956	0.094907	0.099216	1740
BMgn016808	0.094952	0.13615	1741
BMgn016571	0.09509	0.13624	1742
BMgn005414	0.095189	0.099478	1743
BMgn005475	0.095194	0.11395	1744
BMgn007036	0.095194	0.11395	1745
BMgn001036	0.095354	0.099632	1746
BMgn005214	0.095575	0.11428	1747
BMgn009885	0.095683	0.099944	1748
BMgn001286	0.095784	0.11444	1749
BMgn004891	0.095813	0.095798	1750
BMgn013922	0.095813	0.095798	1751
BMgn007571	0.095833	0.15895	1752
BMgn009833	0.095847	0.10009	1753
BMgn010108	0.095915	0.13688	1754
BMgn010980	0.095942	0.10017	1755
BMgn012967	0.095947	0.15912	1756
BMgn001931	0.09597	0.15915	1757
BMgn001337	0.095998	0.095974	1758
BMgn016494	0.096007	0.13695	1759
BMgn013148	0.096023	0.095996	1760
BMgn006446	0.096061	0.11468	1761
BMgn003894	0.096085	0.15932	1762
BMgn017407	0.09611	0.096086	1763
BMgn013624	0.096196	0.096165	1764
BMgn010021	0.096616	0.11514	1765
BMgn008918	0.096694	0.10084	1766
BMgn017173	0.096741	0.10087	1767
BMgn003310	0.096839	0.096815	1768
BMgn012964	0.097016	0.13768	1769
BMgn013291	0.097016	0.13768	1770
BMgn002354	0.097016	0.13768	1771
BMgn014480	0.09707	0.10119	1772
BMgn009954	0.097087	0.16079	1773
BMgn015548	0.09714	0.10125	1774
BMgn017209	0.09717	0.1156	1775
BMgn008597	0.097236	0.16229	1776
BMgn003455	0.09724	0.11564	1777
BMgn011117	0.097258	0.10136	1778
BMgn009333	0.097275	0.16104	1779
BMgn017355	0.097309	0.097283	1780
BMgn009297	0.097309	0.097283	1781
BMgn006178	0.097375	0.10147	1782
BMgn008069	0.097446	0.10155	1783
BMgn007763	0.097517	0.11588	1784
BMgn016532	0.09754	0.10164	1785
BMgn006340	0.097775	0.10186	1786
BMgn002965	0.09789	0.097845	1787
BMgn004504	0.09789	0.097845	1788
BMgn016225	0.098051	0.098007	1789
BMgn004624	0.09821	0.11646	1790
BMgn005512	0.098315	0.10236	1791
BMgn005571	0.098315	0.10236	1792
BMgn015505	0.098315	0.10236	1793
BMgn008189	0.098315	0.10236	1794
BMgn001974	0.098315	0.10236	1795
BMgn009237	0.098315	0.10236	1796
BMgn012646	0.098605	0.16306	1797
BMgn002680	0.098731	0.098723	1798
BMgn001376	0.098855	0.10287	1799
BMgn003197	0.09909	0.10306	1800
BMgn006833	0.099127	0.099114	1801
BMgn013145	0.099137	0.10311	1802
BMgn011470	0.099179	0.11729	1803
BMgn014104	0.099214	0.165	1804
BMgn011796	0.099214	0.165	1805
BMgn000470	0.099288	0.099287	1806
BMgn007301	0.099317	0.1174	1807
BMgn011864	0.09935	0.1394	1808
BMgn007533	0.099395	0.10336	1809
BMgn010834	0.099487	0.1395	1810
BMgn006735	0.099853	0.13976	1811
BMgn000325	0.099857	0.099874	1812
BMgn015829	0.099982	0.10391	1813
BMgn012724	0.10001	0.11799	1814
BMgn001526	0.10015	0.1181	1815
BMgn009610	0.10017	0.16637	1816
BMgn004314	0.1002	0.10021	1817
BMgn013932	0.10037	0.16576	1818
BMgn013445	0.1004	0.14016	1819
BMgn001821	0.10042	0.11834	1820
BMgn011313	0.10049	0.11839	1821
BMgn011111	0.1005	0.10438	1822
BMgn011634	0.10054	0.10054	1823
BMgn008135	0.10058	0.14028	1824
BMgn008919	0.10067	0.11854	1825
BMgn010485	0.10077	0.11863	1826
BMgn004940	0.10085	0.10469	1827
BMgn015072	0.10085	0.10469	1828
BMgn013688	0.10091	0.11874	1829
BMgn005479	0.10098	0.11881	1830
BMgn011629	0.10101	0.16749	1831
BMgn012146	0.10107	0.1668	1832
BMgn012481	0.10109	0.10107	1833
BMgn009855	0.10112	0.11892	1834
BMgn004237	0.10129	0.11906	1835
BMgn015656	0.1013	0.10513	1836
BMgn004318	0.10148	0.10531	1837
BMgn003101	0.10154	0.10151	1838
BMgn008974	0.10156	0.10153	1839
BMgn011808	0.10158	0.10539	1840
BMgn004252	0.10159	0.10155	1841
BMgn009651	0.10167	0.11939	1842
BMgn006118	0.10167	0.10548	1843
BMgn011615	0.10169	0.16771	1844
BMgn010360	0.10174	0.11944	1845
BMgn000376	0.10181	0.1195	1846
BMgn012412	0.10186	0.10564	1847
BMgn011014	0.10186	0.14118	1848
BMgn004509	0.10193	0.1057	1849
BMgn010165	0.102	0.10578	1850
BMgn011010	0.10206	0.10201	1851
BMgn013245	0.10207	0.10584	1852
BMgn000192	0.10208	0.11974	1853
BMgn017072	0.10219	0.10594	1854
BMgn008969	0.10223	0.14146	1855
BMgn007076	0.10248	0.10243	1856
BMgn011917	0.10274	0.12029	1857
BMgn010220	0.10274	0.12029	1858
BMgn011389	0.10308	0.10302	1859
BMgn011936	0.10308	0.10302	1860
BMgn003573	0.10317	0.10687	1861
BMgn008748	0.10317	0.10687	1862
BMgn008407	0.10317	0.10687	1863
BMgn013566	0.10317	0.10687	1864
BMgn016716	0.10317	0.10687	1865
BMgn014831	0.10326	0.12071	1866
BMgn005754	0.10339	0.17025	1867
BMgn001819	0.10341	0.14234	1868
BMgn007906	0.10379	0.10371	1869
BMgn016514	0.10388	0.12125	1870
BMgn008289	0.10391	0.1427	1871
BMgn010168	0.10391	0.1427	1872
BMgn011331	0.10398	0.12134	1873
BMgn007572	0.10409	0.10399	1874
BMgn002487	0.10411	0.10401	1875
BMgn011817	0.10413	0.10774	1876
BMgn000514	0.10416	0.10406	1877
BMgn005684	0.10418	0.10409	1878
BMgn006402	0.10422	0.12154	1879
BMgn010967	0.10424	0.17151	1880
BMgn016498	0.10426	0.10417	1881
BMgn009528	0.10429	0.10788	1882
BMgn012559	0.10436	0.17167	1883
BMgn009722	0.10446	0.10437	1884
BMgn001628	0.10446	0.10805	1885
BMgn008101	0.1045	0.12177	1886
BMgn008559	0.10458	0.17202	1887
BMgn003349	0.1046	0.14324	1888
BMgn010191	0.10477	0.12199	1889
BMgn015628	0.10484	0.12205	1890
BMgn002755	0.10487	0.17244	1891
BMgn012273	0.10496	0.14353	1892
BMgn007870	0.10502	0.10856	1893
BMgn005941	0.10512	0.10501	1894
BMgn012015	0.10518	0.10869	1895
BMgn004709	0.10523	0.10872	1896
BMgn005550	0.10528	0.10877	1897
BMgn003718	0.10535	0.10525	1898
BMgn013150	0.10537	0.10886	1899
BMgn009348	0.10538	0.17315	1900
BMgn000017	0.10547	0.10538	1901
BMgn017401	0.10567	0.12276	1902
BMgn008006	0.10574	0.10565	1903
BMgn011017	0.10598	0.10943	1904
BMgn005082	0.10609	0.10598	1905
BMgn001196	0.10612	0.12312	1906
BMgn004604	0.10612	0.12312	1907
BMgn002025	0.10621	0.10608	1908
BMgn014022	0.10624	0.10611	1909
BMgn007898	0.1064	0.10979	1910
BMgn006518	0.10654	0.10992	1911
BMgn011487	0.10661	0.10649	1912
BMgn005168	0.10668	0.10657	1913
BMgn015297	0.10677	0.11016	1914
BMgn002437	0.10694	0.11034	1915
BMgn009342	0.10696	0.14505	1916
BMgn007714	0.10718	0.12404	1917
BMgn006462	0.1073	0.10721	1918
BMgn000004	0.10733	0.10724	1919
BMgn007313	0.10742	0.14541	1920
BMgn007190	0.10745	0.10736	1921
BMgn001679	0.10757	0.11094	1922
BMgn003569	0.10771	0.11108	1923
BMgn015141	0.10772	0.10763	1924
BMgn016722	0.10783	0.14571	1925
BMgn015423	0.10783	0.14571	1926
BMgn012897	0.10783	0.14571	1927
BMgn001813	0.10791	0.10782	1928
BMgn005637	0.10794	0.10786	1929
BMgn003314	0.10797	0.10788	1930
BMgn014169	0.10804	0.10795	1931
BMgn013187	0.10808	0.12479	1932
BMgn014323	0.10817	0.10807	1933
BMgn015184	0.10828	0.12497	1934
BMgn006648	0.10832	0.11162	1935
BMgn010264	0.10832	0.11162	1936
BMgn017391	0.10832	0.11162	1937
BMgn012801	0.10832	0.11162	1938
BMgn008276	0.10832	0.11162	1939
BMgn011888	0.10832	0.11162	1940
BMgn002130	0.10833	0.10825	1941
BMgn014745	0.10851	0.14622	1942
BMgn013129	0.10864	0.14631	1943
BMgn016011	0.10892	0.1122	1944
BMgn012522	0.10901	0.17871	1945
BMgn002427	0.10904	0.1256	1946
BMgn013087	0.10906	0.11234	1947
BMgn006597	0.10922	0.10917	1948
BMgn010302	0.10922	0.10917	1949
BMgn011359	0.10922	0.10917	1950
BMgn007817	0.10922	0.10917	1951
BMgn014706	0.10941	0.14691	1952
BMgn011091	0.1096	0.14705	1953
BMgn011498	0.10967	0.17606	1954
BMgn008880	0.10969	0.12614	1955
BMgn006308	0.10969	0.12614	1956
BMgn007244	0.10974	0.11298	1957
BMgn015306	0.10986	0.1131	1958
BMgn013023	0.10996	0.14733	1959
BMgn011466	0.11	0.11323	1960
BMgn006029	0.11014	0.11335	1961
BMgn002018	0.11023	0.14755	1962
BMgn007632	0.11032	0.1135	1963
BMgn000233	0.11037	0.1103	1964
BMgn000883	0.11041	0.12674	1965
BMgn007621	0.11042	0.11035	1966
BMgn014259	0.11048	0.12678	1967
BMgn010722	0.1105	0.14774	1968
BMgn017511	0.11055	0.12685	1969
BMgn010715	0.11056	0.11372	1970
BMgn001825	0.11057	0.11049	1971
BMgn004460	0.11074	0.1139	1972
BMgn009419	0.11082	0.12708	1973
BMgn002608	0.11096	0.17691	1974
BMgn001777	0.11112	0.11424	1975
BMgn013599	0.11118	0.14826	1976
BMgn007603	0.1113	0.11441	1977
BMgn008581	0.1113	0.12749	1978
BMgn010366	0.11151	0.12765	1979
BMgn003699	0.11155	0.11154	1980
BMgn007169	0.11164	0.11164	1981
BMgn002756	0.11182	0.11488	1982
BMgn012122	0.11185	0.12796	1983
BMgn003690	0.1119	0.11188	1984
BMgn015016	0.11192	0.12801	1985
BMgn014708	0.11205	0.1151	1986
BMgn016486	0.11223	0.11527	1987
BMgn011826	0.11228	0.18334	1988
BMgn011690	0.1123	0.12831	1989
BMgn008736	0.11232	0.1123	1990
BMgn009421	0.11248	0.17794	1991
BMgn009119	0.11261	0.11565	1992
BMgn000513	0.11267	0.14939	1993
BMgn007705	0.11267	0.14939	1994
BMgn001106	0.11267	0.14939	1995
BMgn006365	0.11267	0.14939	1996
BMgn003637	0.11269	0.11266	1997
BMgn000656	0.11274	0.1127	1998
BMgn011855	0.11277	0.11272	1999
[truncated: 13,659 more rows]

## Sheet: positive screening in 30 ℃
Gene ID	pos|score	pos|p-value	pos|rank
BMgn017403	1.8521e-06	5.3748e-06	1
BMgn000629	3.9639e-06	6.6394e-06	2
BMgn010853	1.1008e-05	4.3947e-05	3
BMgn017582	1.6754e-05	2.6242e-05	4
BMgn012951	2.1112e-05	7.1769e-05	5
BMgn017194	2.4358e-05	0.00011097	6
BMgn012248	3.0472e-05	0.00010275	7
BMgn017294	3.4252e-05	0.00014512	8
BMgn000900	3.7098e-05	0.00012236	9
BMgn015706	3.7098e-05	3.8888e-05	10
BMgn003532	7.3371e-05	0.00029877	11
BMgn014711	0.00012796	0.00039679	12
BMgn001219	0.00016708	0.0005106	13
BMgn013499	0.00017312	0.0003462	14
BMgn010902	0.00018548	0.00057131	15
BMgn011608	0.0001875	0.00057321	16
BMgn006019	0.00022258	0.00044295	17
BMgn017578	0.00022918	0.00082867	18
BMgn003345	0.00027746	0.00055613	19
BMgn012773	0.0003318	0.00065288	20
BMgn011746	0.00033996	0.00066742	21
BMgn015510	0.00034992	0.0010848	22
BMgn016332	0.00036026	0.0010759	23
BMgn016970	0.00036032	0.0007041	24
BMgn002878	0.00039453	0.0011929	25
BMgn016605	0.00040132	0.0012087	26
BMgn015601	0.00041886	0.00082108	27
BMgn007542	0.0004204	0.0008255	28
BMgn002550	0.00045755	0.00046128	29
BMgn000831	0.00045757	0.0013737	30
BMgn017576	0.0004822	0.0014294	31
BMgn017475	0.00050765	0.0010051	32
BMgn003018	0.00051931	0.0010209	33
BMgn006764	0.00054115	0.0015856	34
BMgn015597	0.000544	0.0016134	35
BMgn001384	0.00064037	0.00229	36
BMgn009540	0.00066857	0.0019536	37
BMgn005894	0.00068148	0.0019808	38
BMgn001234	0.00068925	0.0020016	39
BMgn005204	0.00071599	0.002498	40
BMgn004850	0.00077997	0.0022603	41
BMgn017327	0.00079286	0.0015381	42
BMgn001243	0.00081223	0.0023545	43
BMgn001791	0.00084516	0.0024341	44
BMgn009208	0.00086742	0.0028907	45
BMgn000753	0.00092712	0.0030494	46
BMgn007386	0.0009395	0.0026466	47
BMgn015906	0.00096433	0.0018315	48
BMgn016444	0.0010264	0.00099939	49
BMgn000104	0.0010756	0.0031152	50
BMgn016575	0.0010839	0.0031443	51
BMgn006026	0.0011372	0.0031645	52
BMgn009205	0.0011496	0.0033188	53
BMgn011632	0.0011552	0.0033365	54
BMgn017157	0.0011849	0.0037446	55
BMgn005463	0.0011912	0.0023108	56
BMgn008074	0.0012737	0.0012454	57
BMgn002864	0.0012846	0.0035635	58
BMgn005756	0.0013232	0.0012991	59
BMgn014720	0.0013349	0.0036937	60
BMgn005497	0.0013453	0.0026011	61
BMgn006830	0.00138	0.0026719	62
BMgn002182	0.0014337	0.0039524	63
BMgn016822	0.0015203	0.0039903	64
BMgn007043	0.0015211	0.0041794	65
BMgn000449	0.0015437	0.0042375	66
BMgn007643	0.0015944	0.0041357	67
BMgn010755	0.001607	0.0031322	68
BMgn003557	0.0016313	0.0044646	69
BMgn016275	0.0016342	0.0031866	70
BMgn011533	0.0016643	0.0049992	71
BMgn005932	0.0016799	0.0042938	72
BMgn009880	0.0016906	0.0032941	73
BMgn006040	0.0017426	0.0043925	74
BMgn016062	0.0017436	0.0017057	75
BMgn013360	0.0017552	0.0034282	76
BMgn004446	0.0017684	0.0017259	77
BMgn009091	0.0018908	0.0046644	78
BMgn016190	0.0019249	0.0053093	79
BMgn006662	0.0019415	0.0019036	80
BMgn002372	0.0019529	0.0038221	81
BMgn013010	0.0019649	0.0048054	82
BMgn011400	0.0020451	0.0040124	83
BMgn014649	0.0021977	0.0043115	84
BMgn001885	0.0022	0.0043179	85
BMgn010663	0.0022018	0.0052177	86
BMgn013621	0.002226	0.0064545	87
BMgn004167	0.0022494	0.0044197	88
BMgn017218	0.002263	0.002235	89
BMgn008792	0.0022733	0.0062768	90
BMgn000837	0.0022877	0.0022647	91
BMgn010422	0.0023413	0.006476	92
BMgn005644	0.0023751	0.0046536	93
BMgn017135	0.0023814	0.0065784	94
BMgn007446	0.0023872	0.0046814	95
BMgn006621	0.0023976	0.0046998	96
BMgn002905	0.0024114	0.0023918	97
BMgn001397	0.0024216	0.0066821	98
BMgn007944	0.0024717	0.0048351	99
BMgn012403	0.0024835	0.0057317	100
BMgn012356	0.0025095	0.004904	101
BMgn004054	0.0025103	0.002486	102
BMgn014074	0.0025952	0.0050836	103
BMgn016556	0.0026093	0.002591	104
BMgn008085	0.0026587	0.002639	105
BMgn005865	0.002694	0.0052803	106
BMgn017215	0.0027082	0.002682	107
BMgn013005	0.0027309	0.0062022	108
BMgn006575	0.0027793	0.0078835	109
BMgn009572	0.0027798	0.0062863	110
BMgn015538	0.0027973	0.0054725	111
BMgn009826	0.0028165	0.007697	112
BMgn004957	0.0028539	0.0064343	113
BMgn011237	0.0029152	0.0079658	114
BMgn005946	0.003002	0.006722	115
BMgn008706	0.0030024	0.005862	116
BMgn006601	0.0030139	0.0082193	117
BMgn005326	0.003051	0.0068042	118
BMgn017394	0.0030596	0.0059676	119
BMgn009935	0.0030707	0.0093689	120
BMgn009568	0.0031126	0.0084811	121
BMgn015847	0.0032386	0.0063072	122
BMgn003915	0.0032404	0.0090679	123
BMgn009493	0.003247	0.008832	124
BMgn006053	0.0032771	0.0072152	125
BMgn016559	0.0033361	0.0064779	126
BMgn009856	0.0033961	0.0094675	127
BMgn012541	0.0034227	0.0066385	128
BMgn016350	0.0034372	0.0075092	129
BMgn001960	0.003583	0.0069407	130
BMgn000117	0.0036015	0.0069692	131
BMgn017217	0.003606	0.0097426	132
BMgn009113	0.0036253	0.0070109	133
BMgn011924	0.0036323	0.0070236	134
BMgn005239	0.003648	0.0035964	135
BMgn000476	0.0036488	0.0101	136
BMgn004790	0.0036911	0.0071304	137
BMgn006510	0.0036933	0.010224	138
BMgn001023	0.0037053	0.0080106	139
BMgn003019	0.0037059	0.010018	140
BMgn005623	0.0037264	0.010298	141
BMgn015123	0.0037311	0.0072095	142
BMgn015323	0.0037788	0.0072961	143
BMgn016528	0.0039286	0.0075876	144
BMgn012165	0.0039635	0.0076565	145
BMgn015718	0.0040732	0.0078817	146
BMgn016900	0.0041427	0.0040927	147
BMgn011354	0.004147	0.011156	148
BMgn016266	0.0041621	0.008053	149
BMgn004434	0.0041733	0.011409	150
BMgn000089	0.0041921	0.004144	151
BMgn016126	0.0041979	0.011289	152
BMgn015589	0.0042069	0.0081352	153
BMgn013180	0.0042247	0.0081605	154
BMgn016414	0.004259	0.011652	155
BMgn007276	0.0042603	0.0090382	156
BMgn009051	0.0042715	0.0090635	157
BMgn006378	0.0042741	0.0082585	158
BMgn001887	0.0042965	0.011509	159
BMgn016127	0.0043235	0.0083508	160
BMgn015192	0.0043329	0.0083736	161
BMgn001489	0.0044082	0.0093145	162
BMgn008076	0.0044222	0.0085393	163
BMgn013515	0.0045562	0.0095851	164
BMgn017137	0.0045839	0.0088352	165
BMgn006356	0.0046579	0.0089857	166
BMgn006219	0.0046909	0.012178	167
BMgn005180	0.0047115	0.0046384	168
BMgn011301	0.0047781	0.0099911	169
BMgn000860	0.0048599	0.0047858	170
BMgn000048	0.0049387	0.010289	171
BMgn008196	0.004987	0.013596	172
BMgn012576	0.0051099	0.01063	173
BMgn013357	0.0053446	0.011095	174
BMgn014084	0.0053597	0.010355	175
BMgn011913	0.0054056	0.011208	176
BMgn014800	0.0054536	0.013483	177
BMgn014641	0.0055077	0.010623	178
BMgn005316	0.0055224	0.01142	179
BMgn003993	0.0055277	0.0054744	180
BMgn013838	0.005631	0.010852	181
BMgn007548	0.0056761	0.0056356	182
BMgn003065	0.0058036	0.01118	183
BMgn015338	0.0058197	0.01121	184
BMgn011457	0.0059372	0.011427	185
BMgn009809	0.0059718	0.0144	186
BMgn009065	0.0060502	0.011609	187
BMgn003991	0.0060995	0.011689	188
BMgn012554	0.0061088	0.012498	189
BMgn000111	0.0061826	0.012641	190
BMgn016623	0.0062539	0.011982	191
BMgn015946	0.0062933	0.01493	192
BMgn002917	0.0062968	0.012056	193
BMgn003058	0.0063127	0.012081	194
BMgn003730	0.0063166	0.012088	195
BMgn002015	0.0063442	0.012128	196
BMgn015348	0.0063716	0.01506	197
BMgn005408	0.0063994	0.012238	198
BMgn012599	0.0064203	0.013096	199
BMgn003507	0.0064675	0.0064241	200
BMgn007111	0.006494	0.012417	201
BMgn012678	0.006517	0.0064716	202
BMgn000313	0.0065433	0.012507	203
BMgn009269	0.0065521	0.013323	204
BMgn000834	0.0065587	0.012531	205
BMgn016609	0.0065626	0.015384	206
BMgn009830	0.0065926	0.012594	207
BMgn010259	0.0066047	0.015461	208
BMgn013497	0.0066149	0.012634	209
BMgn011141	0.006655	0.01351	210
BMgn015487	0.0066901	0.0066404	211
BMgn008315	0.0066912	0.012773	212
BMgn005532	0.0067594	0.015749	213
BMgn010009	0.0067864	0.018202	214
BMgn015702	0.006789	0.006746	215
BMgn010370	0.0068579	0.01591	216
BMgn001645	0.0069377	0.013185	217
BMgn014132	0.0069674	0.018639	218
BMgn009005	0.0070856	0.013447	219
BMgn016613	0.0071349	0.013536	220
BMgn014936	0.0071429	0.014362	221
BMgn015875	0.0071927	0.014471	222
BMgn013479	0.0072133	0.01923	223
BMgn012189	0.0072153	0.013678	224
BMgn002584	0.0072341	0.01655	225
BMgn013981	0.007263	0.014593	226
BMgn010737	0.0072701	0.0146	227
BMgn003558	0.0073084	0.0072531	228
BMgn014153	0.0073499	0.016731	229
BMgn009744	0.0073621	0.014757	230
BMgn002037	0.0073621	0.014757	231
BMgn002557	0.0073644	0.014761	232
BMgn002934	0.0074383	0.014897	233
BMgn001986	0.0074568	0.0074036	234
BMgn000006	0.0074666	0.016941	235
BMgn014491	0.007512	0.015036	236
BMgn012338	0.0075291	0.014251	237
BMgn010450	0.0075784	0.014351	238
BMgn006970	0.0075859	0.015169	239
BMgn006568	0.0075941	0.014386	240
BMgn011344	0.0076597	0.015288	241
BMgn017381	0.0076778	0.015318	242
BMgn006104	0.007705	0.020447	243
BMgn003656	0.0077262	0.014634	244
BMgn001275	0.0077288	0.0076711	245
BMgn013265	0.0077755	0.014737	246
BMgn013825	0.0078453	0.015635	247
BMgn011274	0.0078813	0.01492	248
BMgn003162	0.0079215	0.017685	249
BMgn008564	0.0079233	0.014997	250
BMgn004473	0.007932	0.021043	251
BMgn014287	0.0080047	0.01514	252
BMgn011712	0.0080313	0.015183	253
BMgn000229	0.008107	0.017986	254
BMgn002568	0.0081204	0.015349	255
BMgn000848	0.008138	0.015385	256
BMgn001000	0.0081764	0.016268	257
BMgn007205	0.0082882	0.01564	258
BMgn012728	0.0083659	0.016617	259
BMgn006589	0.0084652	0.015984	260
BMgn004299	0.008508	0.016067	261
BMgn016385	0.0085446	0.016135	262
BMgn001570	0.0085633	0.016963	263
BMgn016447	0.008619	0.017056	264
BMgn011799	0.0087114	0.016447	265
BMgn004026	0.0087607	0.016537	266
BMgn012279	0.0087666	0.017318	267
BMgn002530	0.0088099	0.016634	268
BMgn012820	0.0088171	0.017405	269
BMgn002382	0.0089141	0.017586	270
BMgn002747	0.0089236	0.016857	271
BMgn004596	0.0091269	0.024011	272
BMgn017188	0.0091546	0.017276	273
BMgn002579	0.0091689	0.018058	274
BMgn011705	0.0092038	0.017368	275
BMgn008991	0.0092091	0.01812	276
BMgn009370	0.009303	0.024435	277
BMgn006709	0.0093566	0.018395	278
BMgn002124	0.0093859	0.0093208	279
BMgn001236	0.009397	0.017744	280
BMgn010877	0.0094143	0.020271	281
BMgn012310	0.0094791	0.01861	282
BMgn012785	0.0095353	0.018713	283
BMgn004576	0.0095485	0.018046	284
BMgn004999	0.009614	0.018163	285
BMgn016685	0.0096215	0.025214	286
BMgn010543	0.0096644	0.018939	287
BMgn001132	0.009709	0.02075	288
BMgn014954	0.009713	0.019024	289
BMgn017579	0.0097321	0.0096775	290
BMgn000155	0.0097454	0.018414	291
BMgn014918	0.0097816	0.0097293	292
BMgn011035	0.0097946	0.018495	293
BMgn010629	0.0098391	0.019259	294
BMgn014487	0.0098482	0.018603	295
BMgn009047	0.0099279	0.025878	296
BMgn012809	0.0099915	0.018845	297
BMgn003689	0.010004	0.0099525	298
BMgn015881	0.010015	0.019568	299
BMgn009384	0.01006	0.026084	300
BMgn000851	0.010139	0.019126	301
BMgn014015	0.010164	0.019825	302
BMgn002141	0.010188	0.019221	303
BMgn016607	0.010227	0.010164	304
BMgn013861	0.010257	0.021631	305
BMgn007656	0.010287	0.019398	306
BMgn002706	0.010356	0.020167	307
BMgn000318	0.010396	0.019592	308
BMgn000118	0.010421	0.019629	309
BMgn001360	0.010462	0.020339	310
BMgn015645	0.010484	0.019759	311
BMgn016398	0.01049	0.022021	312
BMgn015638	0.010494	0.022024	313
BMgn006902	0.01069	0.020154	314
BMgn013222	0.010735	0.020835	315
BMgn010169	0.010757	0.020873	316
BMgn002672	0.010779	0.020318	317
BMgn016610	0.010849	0.020445	318
BMgn005288	0.010976	0.020658	319
BMgn013197	0.01101	0.020718	320
BMgn016284	0.011051	0.021413	321
BMgn010669	0.011071	0.022987	322
BMgn013422	0.011083	0.023013	323
BMgn000776	0.011134	0.02154	324
BMgn016012	0.011216	0.01115	325
BMgn013608	0.011269	0.02177	326
BMgn010938	0.011295	0.021811	327
BMgn010681	0.01142	0.022029	328
BMgn000484	0.011568	0.023797	329
BMgn013594	0.011664	0.021368	330
BMgn011626	0.011711	0.011635	331
BMgn001331	0.011763	0.02146	332
BMgn010640	0.011785	0.011712	333
BMgn009135	0.011788	0.022667	334
BMgn001201	0.011836	0.021528	335
BMgn007611	0.011888	0.024333	336
BMgn016051	0.01191	0.021584	337
BMgn007330	0.011918	0.022894	338
BMgn013230	0.011933	0.011852	339
BMgn016146	0.011958	0.011876	340
BMgn001106	0.011966	0.02448	341
BMgn016412	0.012008	0.021665	342
BMgn011116	0.01203	0.023091	343
BMgn007211	0.012082	0.023188	344
BMgn001249	0.012111	0.023242	345
BMgn012124	0.012147	0.0233	346
BMgn000600	0.012156	0.0218	347
BMgn005853	0.012205	0.021844	348
BMgn006352	0.012254	0.021892	349
BMgn015452	0.012352	0.021972	350
BMgn010734	0.012358	0.025152	351
BMgn002457	0.012428	0.01235	352
BMgn000681	0.01245	0.023833	353
BMgn010348	0.012477	0.012393	354
BMgn000666	0.012511	0.023936	355
BMgn007866	0.012597	0.024071	356
BMgn008248	0.012701	0.025697	357
BMgn002732	0.012725	0.012637	358
BMgn008179	0.012824	0.0245	359
BMgn001819	0.012848	0.025937	360
BMgn010869	0.012855	0.025945	361
BMgn014461	0.012856	0.03054	362
BMgn005578	0.012873	0.012773	363
BMgn013951	0.013041	0.022573	364
BMgn010279	0.013139	0.022674	365
BMgn004673	0.0133	0.02531	366
BMgn015482	0.013357	0.025411	367
BMgn000489	0.013368	0.026812	368
BMgn010736	0.013368	0.013251	369
BMgn010474	0.013436	0.026919	370
BMgn012935	0.013467	0.013352	371
BMgn015188	0.01348	0.025628	372
BMgn002808	0.013708	0.026	373
BMgn006714	0.013729	0.027419	374
BMgn014848	0.01373	0.027419	375
BMgn000206	0.013827	0.023283	376
BMgn014691	0.013843	0.027626	377
BMgn013903	0.0139	0.02633	378
BMgn003770	0.013995	0.026493	379
BMgn008719	0.014121	0.02353	380
BMgn009231	0.014142	0.026764	381
BMgn002189	0.014209	0.014091	382
BMgn011893	0.014215	0.026893	383
BMgn013949	0.014295	0.014178	384
BMgn005689	0.014318	0.02371	385
BMgn003848	0.014367	0.023757	386
BMgn015490	0.014416	0.023804	387
BMgn016483	0.014465	0.023831	388
BMgn006346	0.014662	0.023988	389
BMgn010954	0.014679	0.014563	390
BMgn010823	0.014729	0.027782	391
BMgn006087	0.01476	0.024073	392
BMgn014966	0.014762	0.029209	393
BMgn003373	0.014803	0.027905	394
BMgn011887	0.014806	0.029292	395
BMgn007063	0.014829	0.027947	396
BMgn000025	0.014904	0.02949	397
BMgn008813	0.014982	0.029639	398
BMgn005134	0.015023	0.028295	399
BMgn016160	0.015038	0.028321	400
BMgn014092	0.015097	0.028438	401
BMgn007718	0.015149	0.015053	402
BMgn011631	0.015202	0.024472	403
BMgn004350	0.0153	0.024565	404
BMgn008221	0.015317	0.028805	405
BMgn002390	0.015346	0.015252	406
BMgn005583	0.015419	0.028992	407
BMgn001105	0.01544	0.029026	408
BMgn008635	0.015455	0.029047	409
BMgn008064	0.015464	0.029064	410
BMgn017302	0.015537	0.029196	411
BMgn001080	0.015588	0.030655	412
BMgn015708	0.015668	0.024928	413
BMgn010990	0.015683	0.029473	414
BMgn015216	0.015755	0.029598	415
BMgn011575	0.015831	0.029729	416
BMgn016116	0.015866	0.01577	417
BMgn012234	0.015889	0.02512	418
BMgn007751	0.015904	0.029854	419
BMgn000003	0.015939	0.02992	420
BMgn015637	0.015939	0.02992	421
BMgn009139	0.015978	0.029984	422
BMgn008423	0.015979	0.03133	423
BMgn016019	0.01601	0.040464	424
BMgn016694	0.016051	0.030106	425
BMgn014794	0.016134	0.025329	426
BMgn003750	0.016135	0.031588	427
BMgn001627	0.016187	0.016091	428
BMgn011343	0.016232	0.025412	429
BMgn011287	0.016281	0.025457	430
BMgn016674	0.01633	0.025501	431
BMgn010611	0.016345	0.030662	432
BMgn013151	0.016373	0.030711	433
BMgn001860	0.016428	0.025582	434
BMgn001482	0.016484	0.01641	435
BMgn007381	0.016551	0.025683	436
BMgn008441	0.016583	0.016521	437
BMgn014678	0.016608	0.016548	438
BMgn007783	0.016712	0.031297	439
BMgn004371	0.016772	0.025882	440
BMgn016663	0.016785	0.031431	441
BMgn017253	0.016956	0.032976	442
BMgn000160	0.01701	0.037204	443
BMgn000138	0.017078	0.017031	444
BMgn015189	0.017152	0.033304	445
BMgn005345	0.017177	0.01714	446
BMgn007942	0.017225	0.032185	447
BMgn015473	0.017226	0.017186	448
BMgn011461	0.017236	0.032205	449
BMgn004334	0.017249	0.033457	450
BMgn016526	0.017362	0.017319	451
BMgn004102	0.017362	0.017319	452
BMgn004179	0.017372	0.032451	453
BMgn001528	0.017385	0.032468	454
BMgn013135	0.017474	0.037921	455
BMgn005630	0.017474	0.03385	456
BMgn016762	0.017518	0.032703	457
BMgn004395	0.017569	0.038059	458
BMgn015628	0.017573	0.032805	459
BMgn005715	0.017702	0.03305	460
BMgn006465	0.017703	0.026743	461
BMgn009850	0.017737	0.034269	462
BMgn005466	0.017869	0.017824	463
BMgn013735	0.017973	0.026982	464
BMgn004775	0.017986	0.038729	465
BMgn005080	0.018044	0.033642	466
BMgn015214	0.018096	0.027084	467
BMgn004471	0.018105	0.033739	468
BMgn000584	0.018128	0.034931	469
BMgn011738	0.018145	0.027131	470
BMgn005416	0.018313	0.035242	471
BMgn009526	0.018328	0.034135	472
BMgn016317	0.018365	0.027322	473
BMgn016763	0.018383	0.034223	474
BMgn007034	0.018421	0.035429	475
BMgn004010	0.018488	0.027432	476
BMgn012236	0.018518	0.035592	477
BMgn001051	0.018586	0.02751	478
BMgn008442	0.018636	0.034663	479
BMgn014904	0.018661	0.018639	480
BMgn007246	0.018669	0.034732	481
BMgn003312	0.018691	0.03477	482
BMgn007024	0.018764	0.034926	483
BMgn008126	0.018838	0.035062	484
BMgn004827	0.01888	0.027772	485
BMgn011364	0.018911	0.035187	486
BMgn015574	0.018933	0.018921	487
BMgn000450	0.018939	0.036249	488
BMgn016533	0.018978	0.027859	489
BMgn011199	0.01898	0.035301	490
BMgn010328	0.018984	0.035311	491
BMgn006999	0.019007	0.018992	492
BMgn013986	0.019147	0.035563	493
BMgn017203	0.01917	0.035606	494
BMgn014600	0.01917	0.036665	495
BMgn017105	0.019201	0.036711	496
BMgn013610	0.019272	0.028139	497
BMgn017216	0.019279	0.036853	498
BMgn003500	0.01935	0.035926	499
BMgn002407	0.019419	0.028272	500
BMgn002020	0.019541	0.036256	501
BMgn017521	0.019663	0.028484	502
BMgn009845	0.019699	0.037588	503
BMgn010636	0.019699	0.037588	504
BMgn013232	0.019717	0.036564	505
BMgn007292	0.019786	0.037746	506
BMgn000807	0.020009	0.037091	507
BMgn010054	0.020047	0.037155	508
BMgn008552	0.02007	0.020074	509
BMgn002627	0.020083	0.037227	510
BMgn008687	0.020104	0.028884	511
BMgn010166	0.020144	0.037355	512
BMgn008986	0.020144	0.020142	513
BMgn006883	0.020195	0.038455	514
BMgn014779	0.020202	0.028974	515
BMgn017127	0.020293	0.037631	516
BMgn011934	0.020362	0.038744	517
BMgn016658	0.020421	0.042579	518
BMgn007984	0.020429	0.020416	519
BMgn002241	0.020496	0.029232	520
BMgn017227	0.020522	0.038059	521
BMgn012853	0.020594	0.038194	522
BMgn015362	0.020594	0.029327	523
BMgn009033	0.020692	0.029418	524
BMgn006287	0.020729	0.03933	525
BMgn016104	0.020741	0.029455	526
BMgn015399	0.020741	0.038467	527
BMgn000517	0.02076	0.039388	528
BMgn015030	0.020888	0.038719	529
BMgn014060	0.020924	0.020877	530
BMgn015616	0.020936	0.029625	531
BMgn003351	0.020961	0.020911	532
BMgn008517	0.021035	0.020983	533
BMgn005761	0.021059	0.029755	534
BMgn006626	0.021115	0.039944	535
BMgn008420	0.021148	0.040001	536
BMgn004511	0.0212	0.039271	537
BMgn012880	0.021217	0.039306	538
BMgn005325	0.021217	0.039306	539
BMgn007494	0.021276	0.039406	540
BMgn014991	0.021279	0.029934	541
BMgn016662	0.021329	0.039503	542
BMgn000540	0.021377	0.030016	543
BMgn001751	0.021539	0.040646	544
BMgn005012	0.02154	0.044344	545
BMgn004141	0.021624	0.040001	546
BMgn002036	0.021692	0.04013	547
BMgn002268	0.021759	0.044674	548
BMgn013189	0.021835	0.050923	549
BMgn014373	0.021838	0.040393	550
BMgn002398	0.021975	0.021931	551
BMgn007713	0.021985	0.040668	552
BMgn013933	0.022001	0.04506	553
BMgn013917	0.022062	0.030669	554
BMgn017470	0.022074	0.04152	555
BMgn012411	0.022089	0.040839	556
BMgn002999	0.022111	0.030718	557
BMgn011440	0.022131	0.040919	558
BMgn004585	0.022232	0.041088	559
BMgn006400	0.022256	0.041128	560
BMgn014799	0.022399	0.045667	561
BMgn001005	0.022404	0.030995	562
BMgn014471	0.022414	0.042053	563
BMgn005319	0.02242	0.022386	564
BMgn007980	0.022483	0.045789	565
BMgn012791	0.022487	0.045792	566
BMgn006812	0.022649	0.03124	567
BMgn005337	0.022692	0.022664	568
BMgn017185	0.022698	0.031277	569
BMgn010274	0.022727	0.041958	570
BMgn005244	0.022789	0.042062	571
BMgn000038	0.022865	0.022823	572
BMgn010716	0.022869	0.031438	573
BMgn004505	0.022893	0.042846	574
BMgn004219	0.022909	0.042275	575
BMgn010245	0.022914	0.022871	576
BMgn015427	0.022939	0.022896	577
BMgn014838	0.023043	0.042476	578
BMgn010194	0.023078	0.043137	579
BMgn013518	0.023137	0.023092	580
BMgn010276	0.023138	0.031676	581
BMgn005842	0.02319	0.042736	582
BMgn002903	0.023213	0.043381	583
BMgn012324	0.023227	0.042817	584
BMgn004819	0.0233	0.04294	585
BMgn007563	0.023355	0.043026	586
BMgn005656	0.023398	0.043694	587
BMgn001368	0.023519	0.043298	588
BMgn007387	0.023529	0.032046	589
BMgn003071	0.023571	0.043379	590
BMgn002795	0.023645	0.043517	591
BMgn015814	0.023656	0.023588	592
BMgn008455	0.023665	0.043558	593
BMgn006449	0.023822	0.032311	594
BMgn016443	0.023834	0.047918	595
BMgn004860	0.023875	0.044468	596
BMgn014714	0.023884	0.043946	597
BMgn005275	0.02392	0.032393	598
BMgn000423	0.02393	0.044028	599
BMgn012384	0.023994	0.044148	600
BMgn004124	0.024017	0.032495	601
BMgn003420	0.024066	0.032542	602
BMgn001739	0.024104	0.044347	603
BMgn000718	0.024262	0.032706	604
BMgn013892	0.024329	0.044748	605
BMgn017424	0.024404	0.044881	606
BMgn000374	0.024455	0.045453	607
BMgn002528	0.024457	0.032883	608
BMgn007670	0.024599	0.049089	609
BMgn012275	0.024693	0.045394	610
BMgn013316	0.024724	0.045448	611
BMgn015449	0.024769	0.045533	612
BMgn000334	0.024848	0.033211	613
BMgn009336	0.024906	0.04575	614
BMgn009647	0.024927	0.046248	615
BMgn015044	0.024942	0.024851	616
BMgn006126	0.024979	0.045874	617
BMgn006929	0.024995	0.033363	618
BMgn014451	0.025014	0.046383	619
BMgn014946	0.025066	0.024992	620
BMgn016996	0.025125	0.046155	621
BMgn015671	0.025237	0.046361	622
BMgn012831	0.025239	0.02515	623
BMgn001398	0.025259	0.046806	624
BMgn012706	0.025271	0.046421	625
BMgn017256	0.025294	0.056043	626
BMgn007373	0.025344	0.046555	627
BMgn014558	0.025378	0.046612	628
BMgn014606	0.025416	0.046679	629
BMgn004204	0.025417	0.04668	630
BMgn011059	0.025434	0.033765	631
BMgn017133	0.025487	0.025409	632
BMgn015211	0.025569	0.046946	633
BMgn006690	0.025586	0.025508	634
BMgn014917	0.025635	0.047051	635
BMgn012975	0.025708	0.047169	636
BMgn000440	0.025709	0.025629	637
BMgn011016	0.025762	0.047264	638
BMgn013603	0.025822	0.047771	639
BMgn017335	0.025927	0.047541	640
BMgn013761	0.025964	0.048001	641
BMgn014978	0.025981	0.025899	642
BMgn011178	0.02602	0.034312	643
BMgn009754	0.026165	0.057311	644
BMgn015634	0.026204	0.026122	645
BMgn015935	0.026253	0.026176	646
BMgn003297	0.026266	0.048504	647
BMgn007853	0.026292	0.048154	648
BMgn006149	0.026299	0.048559	649
BMgn008143	0.026364	0.048287	650
BMgn009355	0.026396	0.04873	651
BMgn010364	0.026426	0.026361	652
BMgn000255	0.02646	0.048455	653
BMgn013014	0.026486	0.048501	654
BMgn005798	0.02651	0.04854	655
BMgn014902	0.026674	0.026624	656
BMgn010005	0.026678	0.04919	657
BMgn015974	0.026682	0.048846	658
BMgn011181	0.026682	0.048846	659
BMgn004715	0.026703	0.034916	660
BMgn012659	0.026729	0.048927	661
BMgn006354	0.026806	0.049035	662
BMgn011045	0.02685	0.035045	663
BMgn016386	0.026904	0.049206	664
BMgn013537	0.026947	0.049271	665
BMgn000650	0.02697	0.049312	666
BMgn002811	0.026995	0.026925	667
BMgn011014	0.027002	0.049749	668
BMgn014077	0.027075	0.049857	669
BMgn000330	0.027094	0.035262	670
BMgn013921	0.027171	0.050023	671
BMgn009697	0.027207	0.049709	672
BMgn011128	0.027239	0.049759	673
BMgn001550	0.027312	0.049885	674
BMgn002080	0.027421	0.050069	675
BMgn014708	0.027484	0.035612	676
BMgn006277	0.027484	0.035612	677
BMgn017043	0.02763	0.035743	678
BMgn007551	0.027656	0.050846	679
BMgn006629	0.027656	0.050476	680
BMgn016464	0.027679	0.035785	681
BMgn007949	0.02772	0.054037	682
BMgn007543	0.027801	0.054167	683
BMgn015412	0.027821	0.050767	684
BMgn003576	0.027825	0.035909	685
BMgn000624	0.02785	0.051183	686
BMgn007026	0.027947	0.027875	687
BMgn003466	0.027967	0.05102	688
BMgn016596	0.02802	0.036078	689
BMgn000216	0.028113	0.051261	690
BMgn000589	0.028118	0.036176	691
BMgn015453	0.028182	0.028105	692
BMgn011752	0.028284	0.051567	693
BMgn011820	0.028351	0.051683	694
BMgn012834	0.028356	0.028292	695
BMgn011916	0.028404	0.05178	696
BMgn016329	0.028529	0.028445	697
BMgn009947	0.028584	0.055394	698
BMgn008769	0.02862	0.052183	699
BMgn010177	0.028654	0.036661	700
BMgn005431	0.028703	0.052533	701
BMgn012672	0.028801	0.03678	702
BMgn002508	0.028875	0.028764	703
BMgn004111	0.028877	0.052621	704
BMgn007331	0.028931	0.052704	705
BMgn010420	0.029044	0.037005	706
BMgn013738	0.02908	0.056169	707
BMgn014944	0.029131	0.053037	708
BMgn016684	0.029209	0.029145	709
BMgn014482	0.029209	0.029145	710
BMgn007310	0.029209	0.029145	711
BMgn000539	0.029239	0.037181	712
BMgn000627	0.029277	0.053287	713
BMgn008359	0.029281	0.053514	714
BMgn010882	0.02938	0.053463	715
BMgn012463	0.0296	0.054025	716
BMgn008131	0.029604	0.053852	717
BMgn003880	0.029605	0.037538	718
BMgn002507	0.029723	0.054057	719
BMgn004502	0.029736	0.054086	720
BMgn005101	0.029737	0.054281	721
BMgn008738	0.029737	0.054281	722
BMgn011510	0.029775	0.037673	723
BMgn010439	0.029824	0.037718	724
BMgn014590	0.029842	0.057327	725
BMgn006420	0.029859	0.054281	726
BMgn005341	0.029872	0.057371	727
BMgn011368	0.029873	0.037755	728
BMgn003676	0.029932	0.054396	729
BMgn017361	0.030015	0.054758	730
BMgn013429	0.030058	0.057676	731
BMgn012537	0.030068	0.037944	732
BMgn001113	0.03008	0.054644	733
BMgn012394	0.030087	0.030003	734
BMgn003890	0.030112	0.030026	735
BMgn001322	0.030136	0.030051	736
BMgn002806	0.03026	0.030166	737
BMgn017376	0.030295	0.055006	738
BMgn016937	0.030311	0.038166	739
BMgn002007	0.030409	0.038254	740
BMgn000114	0.030462	0.055496	741
BMgn012691	0.030513	0.055358	742
BMgn003331	0.030551	0.055426	743
BMgn014984	0.030603	0.038425	744
BMgn002354	0.030604	0.055729	745
BMgn014352	0.030749	0.038558	746
BMgn006857	0.030752	0.055962	747
BMgn007184	0.031022	0.055977	748
BMgn002159	0.031042	0.038821	749
BMgn003903	0.031042	0.038821	750
BMgn007669	0.031094	0.056048	751
BMgn016100	0.03115	0.031052	752
BMgn008416	0.031236	0.038997	753
BMgn003712	0.031312	0.056208	754
BMgn002134	0.031421	0.056298	755
BMgn011748	0.031484	0.031388	756
BMgn008713	0.03153	0.056384	757
BMgn017076	0.03156	0.060014	758
BMgn002502	0.031595	0.031502	759
BMgn014172	0.031675	0.056499	760
BMgn005506	0.031681	0.060211	761
BMgn011053	0.031682	0.031591	762
BMgn017573	0.031821	0.056618	763
BMgn009148	0.031863	0.057804	764
BMgn000827	0.031918	0.039625	765
BMgn000132	0.031966	0.056742	766
BMgn006265	0.032015	0.039713	767
BMgn005980	0.032108	0.058205	768
BMgn008565	0.032115	0.032057	769
BMgn014905	0.032184	0.056916	770
BMgn005369	0.032255	0.061096	771
BMgn002339	0.032307	0.039986	772
BMgn002138	0.032329	0.057036	773
BMgn014770	0.032362	0.032303	774
BMgn009794	0.03238	0.040061	775
BMgn003954	0.032523	0.032472	776
BMgn000129	0.032547	0.057216	777
BMgn016997	0.032636	0.059086	778
BMgn004362	0.032656	0.057306	779
BMgn005983	0.032656	0.059118	780
BMgn011391	0.032683	0.059159	781
BMgn004783	0.032745	0.040397	782
BMgn015324	0.032783	0.032749	783
BMgn006831	0.032906	0.032877	784
BMgn010905	0.032973	0.059621	785
BMgn008557	0.033055	0.057628	786
BMgn010026	0.033129	0.05987	787
BMgn009654	0.033345	0.057844	788
BMgn007511	0.033377	0.040995	789
BMgn014929	0.033446	0.060398	790
BMgn012050	0.033562	0.058028	791
BMgn013160	0.033599	0.033555	792
BMgn017069	0.033635	0.058094	793
BMgn000532	0.033673	0.033628	794
BMgn011348	0.033721	0.068483	795
BMgn012585	0.033863	0.061083	796
BMgn001958	0.033925	0.058338	797
BMgn012895	0.033937	0.061214	798
BMgn002998	0.033995	0.033933	799
BMgn011806	0.034009	0.04154	800
BMgn016922	0.034093	0.034035	801
BMgn004753	0.034242	0.034174	802
BMgn009046	0.034242	0.034174	803
BMgn014875	0.034287	0.058622	804
BMgn009356	0.034423	0.041898	805
BMgn001777	0.034423	0.041898	806
BMgn007530	0.034432	0.058742	807
BMgn010803	0.034612	0.062281	808
BMgn013547	0.03465	0.058919	809
BMgn005251	0.034687	0.034635	810
BMgn005541	0.03494	0.059161	811
BMgn014088	0.035017	0.065388	812
BMgn005914	0.035127	0.042524	813
BMgn014775	0.035158	0.065609	814
BMgn001026	0.035206	0.035168	815
BMgn009716	0.035291	0.065825	816
BMgn012989	0.03537	0.042756	817
BMgn002220	0.035382	0.063584	818
BMgn011439	0.035592	0.059697	819
BMgn013304	0.035662	0.043021	820
BMgn007196	0.03571	0.043059	821
BMgn005794	0.035737	0.05982	822
BMgn017184	0.0358	0.035736	823
BMgn000643	0.035899	0.035839	824
BMgn014405	0.035912	0.071746	825
BMgn002946	0.035954	0.059989	826
BMgn011677	0.036002	0.043326	827
BMgn007999	0.03605	0.043374	828
BMgn002387	0.036121	0.036056	829
BMgn005631	0.036243	0.060223	830
BMgn015669	0.036369	0.036309	831
BMgn002698	0.03639	0.043653	832
BMgn013696	0.036542	0.036496	833
BMgn004996	0.036641	0.036577	834
BMgn005245	0.036645	0.06565	835
BMgn011947	0.036682	0.043907	836
BMgn013911	0.036715	0.068096	837
BMgn007510	0.036727	0.065782	838
BMgn012302	0.03675	0.060631	839
BMgn002749	0.036779	0.043991	840
BMgn013372	0.036827	0.044034	841
BMgn005185	0.036846	0.068287	842
BMgn006688	0.036851	0.036762	843
BMgn014713	0.036924	0.044144	844
BMgn013731	0.036976	0.066177	845
BMgn011724	0.037112	0.060898	846
BMgn003955	0.037211	0.066599	847
BMgn013745	0.037313	0.044488	848
BMgn005924	0.037329	0.061059	849
BMgn001173	0.037401	0.06112	850
BMgn014796	0.037452	0.069191	851
BMgn002342	0.037469	0.037406	852
BMgn016032	0.037469	0.037406	853
BMgn008330	0.037546	0.061236	854
BMgn011490	0.037557	0.06935	855
BMgn002547	0.037725	0.067421	856
BMgn005396	0.037787	0.067517	857
BMgn008173	0.037835	0.06148	858
BMgn015623	0.037943	0.045082	859
BMgn009630	0.038039	0.074847	860
BMgn001738	0.03804	0.045174	861
BMgn004042	0.038052	0.061669	862
BMgn005417	0.038076	0.067988	863
BMgn009041	0.0381	0.038039	864
BMgn001354	0.038137	0.045262	865
BMgn002596	0.038171	0.070316	866
BMgn003811	0.038234	0.045364	867
BMgn005366	0.038269	0.061852	868
BMgn001639	0.038429	0.068536	869
BMgn016530	0.038461	0.070771	870
BMgn015390	0.038486	0.062018	871
BMgn009562	0.038486	0.062018	872
BMgn016264	0.038486	0.062018	873
BMgn007518	0.038574	0.045682	874
BMgn007388	0.038711	0.071172	875
BMgn007062	0.038816	0.045896	876
BMgn002388	0.038992	0.062431	877
BMgn016349	0.039036	0.069513	878
BMgn007180	0.039114	0.039043	879
BMgn016281	0.039136	0.062548	880
BMgn002076	0.039253	0.04632	881
BMgn001806	0.039281	0.062664	882
BMgn012110	0.039301	0.046363	883
BMgn016133	0.039337	0.039276	884
BMgn000120	0.03935	0.046407	885
BMgn016486	0.039786	0.046816	886
BMgn004404	0.039835	0.046868	887
BMgn007768	0.039955	0.039857	888
BMgn013044	0.039968	0.073135	889
BMgn017113	0.040028	0.047037	890
BMgn000844	0.040029	0.039935	891
BMgn008146	0.040092	0.071311	892
BMgn006373	0.040185	0.071467	893
BMgn014174	0.04022	0.063429	894
BMgn017167	0.040292	0.063493	895
BMgn012019	0.040293	0.071632	896
BMgn010020	0.040368	0.047348	897
BMgn009597	0.04038	0.071775	898
BMgn000973	0.040436	0.063623	899
BMgn007845	0.04044	0.047408	900
BMgn008254	0.040519	0.071998	901
BMgn003600	0.040647	0.040564	902
BMgn005508	0.040653	0.063794	903
BMgn014052	0.040672	0.040589	904
BMgn012962	0.040797	0.063907	905
BMgn003711	0.040804	0.047751	906
BMgn012964	0.040875	0.072561	907
BMgn016191	0.040895	0.040802	908
BMgn007664	0.04094	0.072664	909
BMgn002831	0.040949	0.047878	910
BMgn000542	0.041086	0.064138	911
BMgn001448	0.041093	0.041	912
BMgn011216	0.041302	0.064318	913
BMgn010043	0.041337	0.048241	914
BMgn015479	0.041339	0.073302	915
BMgn001007	0.041391	0.075392	916
BMgn013067	0.041518	0.064503	917
BMgn002621	0.041549	0.073659	918
BMgn011897	0.041626	0.080134	919
BMgn012280	0.041807	0.064736	920
BMgn001754	0.041951	0.064866	921
BMgn016406	0.042095	0.064981	922
BMgn013747	0.042121	0.076561	923
BMgn011395	0.042161	0.074629	924
BMgn002938	0.042181	0.042117	925
BMgn012374	0.042257	0.049066	926
BMgn006504	0.042276	0.065129	927
BMgn013834	0.04228	0.042222	928
BMgn010960	0.042305	0.049108	929
BMgn014884	0.042353	0.049151	930
BMgn011434	0.042456	0.065287	931
BMgn008656	0.042471	0.077116	932
BMgn010110	0.042499	0.049284	933
BMgn010612	0.042554	0.077256	934
BMgn002856	0.042644	0.049419	935
BMgn009684	0.042741	0.04951	936
BMgn002634	0.042744	0.065534	937
BMgn008236	0.042888	0.075807	938
BMgn013779	0.042898	0.042852	939
BMgn017254	0.042957	0.07792	940
BMgn014553	0.04296	0.065708	941
BMgn011756	0.043032	0.065754	942
BMgn008692	0.043063	0.076073	943
BMgn013107	0.043104	0.065817	944
BMgn007610	0.043169	0.078227	945
BMgn015193	0.043176	0.065876	946
BMgn004872	0.043224	0.04995	947
BMgn016210	0.043224	0.04995	948
BMgn009445	0.043309	0.076463	949
BMgn001228	0.043343	0.043315	950
BMgn006996	0.043418	0.050126	951
BMgn017404	0.043442	0.043419	952
BMgn011904	0.043446	0.076688	953
BMgn016446	0.043541	0.076843	954
BMgn002218	0.043611	0.050305	955
BMgn005163	0.04362	0.076974	956
BMgn004491	0.043665	0.043627	957
BMgn010729	0.043753	0.066358	958
BMgn002952	0.043757	0.050439	959
BMgn007240	0.043897	0.066465	960
BMgn006297	0.043899	0.077442	961
BMgn011803	0.043962	0.043913	962
BMgn011227	0.043974	0.050632	963
BMgn007840	0.044329	0.08005	964
BMgn011192	0.044402	0.078201	965
BMgn009699	0.044555	0.051178	966
BMgn008328	0.044627	0.05124	967
BMgn004121	0.044654	0.044638	968
BMgn016910	0.044689	0.078657	969
BMgn007879	0.044716	0.044701	970
BMgn001029	0.044724	0.051336	971
BMgn014572	0.044761	0.067174	972
BMgn017331	0.044772	0.051381	973
BMgn006628	0.044865	0.080862	974
BMgn005594	0.044951	0.044959	975
BMgn002911	0.045192	0.067541	976
BMgn006811	0.045255	0.051815	977
BMgn002620	0.045347	0.045366	978
BMgn000561	0.045371	0.0797	979
BMgn011814	0.045461	0.0818	980
BMgn012699	0.045497	0.05203	981
BMgn005274	0.045544	0.045582	982
BMgn003099	0.045545	0.052069	983
BMgn011884	0.045569	0.045602	984
BMgn003293	0.045594	0.052112	985
BMgn005039	0.045624	0.067886	986
BMgn012725	0.045642	0.052155	987
BMgn000637	0.045696	0.067941	988
BMgn013659	0.04603	0.080773	989
BMgn007505	0.046064	0.046055	990
BMgn001628	0.046077	0.052559	991
BMgn013554	0.046122	0.080923	992
BMgn006913	0.046138	0.046125	993
BMgn010749	0.046144	0.080959	994
BMgn011933	0.046188	0.046171	995
BMgn005108	0.046199	0.068354	996
BMgn001428	0.046294	0.052752	997
BMgn011393	0.046294	0.052752	998
BMgn016773	0.046294	0.052752	999
BMgn004861	0.046294	0.052752	1000
BMgn007531	0.046313	0.081232	1001
BMgn007575	0.046441	0.081428	1002
BMgn011215	0.046512	0.052932	1003
BMgn012276	0.046652	0.083626	1004
BMgn013404	0.046702	0.068795	1005
BMgn017368	0.046705	0.053108	1006
BMgn008175	0.046774	0.068853	1007
BMgn002813	0.046876	0.082131	1008
BMgn013410	0.046945	0.082247	1009
BMgn017095	0.046968	0.082276	1010
BMgn008755	0.04699	0.069038	1011
BMgn008597	0.047055	0.087931	1012
BMgn015683	0.047062	0.069092	1013
BMgn012614	0.047081	0.084256	1014
BMgn005669	0.047103	0.047113	1015
BMgn004482	0.047134	0.069152	1016
BMgn010151	0.047333	0.053681	1017
BMgn013673	0.047382	0.082926	1018
BMgn003359	0.047474	0.047488	1019
BMgn012008	0.047565	0.069515	1020
BMgn000321	0.047573	0.047587	1021
BMgn007516	0.047604	0.085043	1022
BMgn014570	0.047622	0.053923	1023
BMgn006566	0.047671	0.053965	1024
BMgn010352	0.047708	0.069608	1025
BMgn015296	0.047719	0.053995	1026
BMgn012546	0.047767	0.054045	1027
BMgn015063	0.047807	0.04783	1028
BMgn004864	0.048099	0.084073	1029
BMgn005119	0.048126	0.084116	1030
BMgn004598	0.048153	0.054364	1031
BMgn010763	0.048221	0.084266	1032
BMgn010488	0.048265	0.048282	1033
BMgn009292	0.048283	0.07011	1034
BMgn002531	0.048314	0.048342	1035
BMgn016341	0.048491	0.054709	1036
BMgn014076	0.048512	0.048538	1037
BMgn004361	0.048543	0.086543	1038
BMgn016197	0.048785	0.070532	1039
BMgn007351	0.048798	0.085188	1040
BMgn000364	0.048821	0.08522	1041
BMgn012006	0.048877	0.055051	1042
BMgn004381	0.048926	0.087144	1043
BMgn015266	0.049044	0.087308	1044
BMgn000668	0.04907	0.055227	1045
BMgn009433	0.049149	0.08575	1046
BMgn012662	0.049166	0.055301	1047
BMgn016940	0.049215	0.055355	1048
BMgn013729	0.049216	0.070907	1049
BMgn007691	0.049269	0.085946	1050
BMgn015986	0.049359	0.055485	1051
BMgn009781	0.049408	0.055529	1052
BMgn005729	0.049456	0.055584	1053
BMgn016601	0.049502	0.07115	1054
BMgn009397	0.049551	0.049649	1055
BMgn016041	0.049574	0.071214	1056
BMgn005709	0.049576	0.049677	1057
BMgn013339	0.04965	0.086581	1058
BMgn011189	0.049697	0.055827	1059
BMgn015184	0.049718	0.071334	1060
BMgn001757	0.049745	0.055881	1061
BMgn016200	0.049793	0.055922	1062
BMgn004466	0.049861	0.071438	1063
BMgn003675	0.049897	0.049991	1064
BMgn008428	0.049924	0.087033	1065
BMgn016471	0.049949	0.088724	1066
BMgn007912	0.049972	0.050077	1067
BMgn008737	0.050004	0.071556	1068
BMgn015213	0.05001	0.056101	1069
BMgn008646	0.050021	0.050122	1070
BMgn001792	0.050031	0.087207	1071
BMgn003782	0.050131	0.056214	1072
BMgn009808	0.050148	0.071669	1073
BMgn014193	0.05022	0.071728	1074
BMgn017138	0.050435	0.071896	1075
BMgn010707	0.050468	0.056514	1076
BMgn002554	0.050661	0.056687	1077
BMgn003753	0.050681	0.089845	1078
BMgn013548	0.05077	0.089986	1079
BMgn001709	0.050982	0.088717	1080
BMgn006858	0.050986	0.051041	1081
BMgn009701	0.051037	0.088804	1082
BMgn014735	0.051095	0.057079	1083
BMgn008870	0.051134	0.0512	1084
BMgn005539	0.051187	0.072509	1085
BMgn015640	0.051187	0.072509	1086
BMgn001690	0.051287	0.057258	1087
BMgn006860	0.051287	0.057258	1088
BMgn006060	0.051287	0.057258	1089
BMgn012542	0.051553	0.089614	1090
BMgn015004	0.051577	0.057516	1091
BMgn002269	0.051629	0.051724	1092
BMgn016645	0.051653	0.051745	1093
BMgn004496	0.051724	0.072943	1094
BMgn013666	0.051733	0.091489	1095
BMgn000903	0.051802	0.051882	1096
BMgn006199	0.051866	0.05778	1097
BMgn002471	0.051876	0.05195	1098
BMgn002532	0.051962	0.05787	1099
BMgn001664	0.05201	0.057909	1100
BMgn009518	0.052111	0.052182	1101
BMgn016213	0.052115	0.092063	1102
BMgn005393	0.052137	0.090538	1103
BMgn010261	0.052203	0.058092	1104
BMgn012978	0.052369	0.073498	1105
BMgn008020	0.052443	0.058302	1106
BMgn007002	0.05254	0.05839	1107
BMgn006284	0.052588	0.058435	1108
BMgn016878	0.052599	0.091306	1109
BMgn001944	0.052708	0.058549	1110
BMgn008542	0.052766	0.052836	1111
BMgn000436	0.052787	0.091608	1112
BMgn007277	0.052829	0.058663	1113
BMgn006499	0.052941	0.073974	1114
BMgn009084	0.052956	0.091875	1115
BMgn010726	0.052973	0.058786	1116
BMgn015713	0.053141	0.058937	1117
BMgn004848	0.053141	0.058937	1118
BMgn006240	0.053236	0.053288	1119
BMgn003911	0.053391	0.092564	1120
BMgn016004	0.053406	0.059184	1121
BMgn016112	0.053442	0.074388	1122
BMgn004264	0.053647	0.059402	1123
BMgn006065	0.05378	0.053812	1124
BMgn009963	0.053887	0.059631	1125
BMgn008098	0.053902	0.093412	1126
BMgn002862	0.054032	0.059776	1127
BMgn004187	0.054102	0.054115	1128
BMgn013899	0.054128	0.059872	1129
BMgn011429	0.05417	0.093825	1130
BMgn009243	0.054212	0.093911	1131
BMgn010236	0.054417	0.060156	1132
BMgn017223	0.054443	0.075238	1133
BMgn016703	0.054609	0.060332	1134
BMgn015934	0.054646	0.054626	1135
BMgn006719	0.054657	0.060384	1136
BMgn000441	0.054705	0.060429	1137
BMgn012588	0.054782	0.094845	1138
BMgn004843	0.054893	0.054862	1139
BMgn007684	0.055017	0.054986	1140
BMgn016721	0.055042	0.060748	1141
BMgn003480	0.055066	0.05504	1142
BMgn010936	0.055091	0.055068	1143
BMgn005083	0.055114	0.060816	1144
BMgn016502	0.055229	0.07592	1145
BMgn014147	0.055289	0.055261	1146
BMgn014950	0.055301	0.075975	1147
BMgn015048	0.055338	0.055299	1148
BMgn004944	0.055372	0.076036	1149
BMgn016314	0.055378	0.061051	1150
BMgn011527	0.055413	0.055371	1151
BMgn008990	0.055426	0.0611	1152
BMgn012938	0.055515	0.076151	1153
BMgn013766	0.055568	0.096065	1154
BMgn000488	0.055592	0.096099	1155
BMgn008816	0.055617	0.096131	1156
BMgn003841	0.055667	0.061315	1157
BMgn003431	0.055715	0.061358	1158
BMgn016293	0.055801	0.076378	1159
BMgn013614	0.055967	0.096709	1160
BMgn014197	0.056003	0.06162	1161
BMgn012762	0.056093	0.056045	1162
BMgn012091	0.056218	0.098483	1163
BMgn016006	0.056278	0.056223	1164
BMgn002108	0.056393	0.097388	1165
BMgn004594	0.056427	0.056372	1166
BMgn008208	0.056437	0.098831	1167
BMgn002875	0.056443	0.076888	1168
BMgn012536	0.056532	0.062116	1169
BMgn011044	0.05658	0.062164	1170
BMgn009236	0.056607	0.097728	1171
BMgn002644	0.056628	0.062211	1172
BMgn012345	0.056676	0.062252	1173
BMgn009504	0.056677	0.097844	1174
BMgn016672	0.056699	0.056637	1175
BMgn006085	0.056724	0.062296	1176
BMgn015954	0.056729	0.07712	1177
BMgn001118	0.056731	0.097927	1178
BMgn002295	0.056781	0.098012	1179
BMgn012056	0.056843	0.098109	1180
BMgn009008	0.056909	0.056866	1181
BMgn008434	0.056909	0.056866	1182
BMgn009787	0.056909	0.056866	1183
BMgn007920	0.056943	0.077292	1184
BMgn009577	0.057014	0.077347	1185
BMgn001722	0.05734	0.098785	1186
BMgn002163	0.057348	0.06286	1187
BMgn012970	0.057371	0.077639	1188
BMgn012911	0.057564	0.063085	1189
BMgn005989	0.057564	0.063085	1190
BMgn014948	0.057656	0.077872	1191
BMgn005562	0.057656	0.077872	1192
BMgn004058	0.057656	0.077872	1193
BMgn010437	0.057718	0.099065	1194
BMgn001334	0.057925	0.063401	1195
BMgn000044	0.057941	0.078121	1196
BMgn002511	0.058183	0.058176	1197
BMgn005471	0.058333	0.099533	1198
BMgn005977	0.058422	0.10185	1199
BMgn001290	0.058501	0.063927	1200
BMgn007666	0.058512	0.078575	1201
BMgn014472	0.058569	0.099711	1202
BMgn002721	0.058578	0.058554	1203
BMgn015924	0.058597	0.064003	1204
BMgn000898	0.058618	0.078657	1205
BMgn012558	0.058725	0.078744	1206
BMgn001221	0.058752	0.058728	1207
BMgn004631	0.058797	0.078804	1208
BMgn012595	0.059029	0.064396	1209
BMgn005984	0.059122	0.059092	1210
BMgn013690	0.05937	0.059358	1211
BMgn015418	0.059509	0.079421	1212
BMgn001479	0.059556	0.064871	1213
BMgn013826	0.059667	0.059669	1214
BMgn009863	0.059723	0.079593	1215
BMgn006723	0.059748	0.065033	1216
BMgn016909	0.059794	0.079643	1217
BMgn002031	0.059796	0.065076	1218
BMgn008364	0.060036	0.065292	1219
BMgn015693	0.060036	0.065292	1220
BMgn010783	0.060081	0.10085	1221
BMgn011950	0.060112	0.060125	1222
BMgn007420	0.060144	0.10459	1223
BMgn009886	0.060176	0.10092	1224
BMgn001775	0.060211	0.060229	1225
BMgn007883	0.060221	0.080015	1226
BMgn010146	0.060292	0.080064	1227
BMgn005313	0.060467	0.065697	1228
BMgn001790	0.060515	0.065741	1229
BMgn015070	0.060557	0.060584	1230
BMgn006735	0.060648	0.10128	1231
BMgn009510	0.060732	0.10549	1232
BMgn009911	0.060742	0.10135	1233
BMgn002951	0.060755	0.065948	1234
BMgn002411	0.060803	0.065991	1235
BMgn012129	0.06082	0.10561	1236
BMgn008288	0.060878	0.060905	1237
BMgn008453	0.060933	0.080602	1238
BMgn000749	0.061027	0.061047	1239
BMgn003759	0.061146	0.080764	1240
BMgn007821	0.061186	0.066305	1241
BMgn005481	0.061234	0.066359	1242
BMgn012320	0.061249	0.061269	1243
BMgn001826	0.061282	0.066411	1244
BMgn002331	0.061426	0.066559	1245
BMgn011438	0.061447	0.06145	1246
BMgn016144	0.061474	0.066602	1247
BMgn003252	0.061546	0.061542	1248
BMgn014818	0.061591	0.10199	1249
BMgn011647	0.061618	0.066741	1250
BMgn004099	0.061644	0.081175	1251
BMgn012972	0.061714	0.066823	1252
BMgn017414	0.061857	0.081345	1253
BMgn010678	0.061929	0.081405	1254
BMgn010365	0.061991	0.061982	1255
BMgn015027	0.062	0.081463	1256
BMgn008079	0.062097	0.067176	1257
BMgn017484	0.06236	0.067436	1258
BMgn007794	0.06244	0.10264	1259
BMgn003784	0.062462	0.081849	1260
BMgn007945	0.062576	0.067639	1261
BMgn011188	0.062767	0.067817	1262
BMgn015625	0.062847	0.10872	1263
BMgn013648	0.062857	0.062826	1264
BMgn003286	0.063005	0.062977	1265
BMgn008888	0.063103	0.068134	1266
BMgn006422	0.06315	0.068184	1267
BMgn014746	0.063179	0.063176	1268
BMgn004347	0.063246	0.068261	1269
BMgn013331	0.063265	0.063255	1270
BMgn010585	0.063294	0.0683	1271
BMgn002968	0.063302	0.063296	1272
BMgn005591	0.063317	0.10946	1273
BMgn010880	0.06335	0.082551	1274
BMgn016162	0.063387	0.10957	1275
BMgn014313	0.063419	0.10962	1276
BMgn016653	0.063486	0.068474	1277
BMgn007046	0.063492	0.082671	1278
BMgn008899	0.063533	0.068518	1279
BMgn002207	0.063563	0.082716	1280
BMgn010293	0.063629	0.068616	1281
BMgn015701	0.063634	0.08278	1282
BMgn008128	0.063712	0.10362	1283
BMgn007654	0.063725	0.068708	1284
BMgn005318	0.063846	0.063851	1285
BMgn002510	0.063896	0.063904	1286
BMgn007122	0.064108	0.06904	1287
BMgn004513	0.064156	0.069082	1288
BMgn015397	0.064344	0.083328	1289
BMgn007065	0.06449	0.11127	1290
BMgn012287	0.064491	0.0694	1291
BMgn011813	0.064491	0.0694	1292
BMgn015787	0.064588	0.064616	1293
BMgn010401	0.064606	0.10432	1294
BMgn014624	0.064634	0.069529	1295
BMgn014152	0.064724	0.11162	1296
BMgn014777	0.064768	0.11168	1297
BMgn006110	0.06477	0.083706	1298
BMgn017322	0.064801	0.11173	1299
BMgn016289	0.064867	0.11183	1300
BMgn011473	0.064873	0.069759	1301
BMgn012439	0.064983	0.083895	1302
BMgn003793	0.065065	0.069947	1303
BMgn013052	0.065108	0.065141	1304
BMgn004998	0.065207	0.065256	1305
BMgn016117	0.065231	0.084097	1306
BMgn012472	0.065264	0.11242	1307
BMgn011454	0.065337	0.084199	1308
BMgn006235	0.065429	0.065489	1309
BMgn000965	0.065447	0.07028	1310
BMgn000758	0.06555	0.084396	1311
BMgn010157	0.065591	0.070423	1312
BMgn012196	0.065602	0.065644	1313
BMgn000639	0.065775	0.065823	1314
BMgn002997	0.065782	0.070593	1315
BMgn002499	0.065834	0.084618	1316
BMgn007642	0.065896	0.11335	1317
BMgn004070	0.065899	0.065958	1318
BMgn011337	0.066013	0.11352	1319
BMgn001121	0.066017	0.10543	1320
BMgn002962	0.066021	0.070819	1321
BMgn010398	0.06614	0.070918	1322
BMgn016249	0.066205	0.10558	1323
BMgn013523	0.066259	0.084997	1324
BMgn016765	0.06626	0.071025	1325
BMgn009755	0.066356	0.071104	1326
BMgn015672	0.066403	0.071142	1327
BMgn008026	0.066571	0.071305	1328
BMgn014834	0.066616	0.066691	1329
BMgn005535	0.066642	0.071371	1330
BMgn016741	0.066684	0.085363	1331
BMgn001763	0.066786	0.071501	1332
BMgn004444	0.066929	0.071642	1333
BMgn014207	0.066968	0.085611	1334
BMgn017000	0.06705	0.10621	1335
BMgn009196	0.067111	0.067177	1336
BMgn012817	0.067238	0.10636	1337
BMgn001733	0.067322	0.085913	1338
BMgn006112	0.067383	0.067421	1339
BMgn009359	0.067393	0.085976	1340
BMgn004241	0.067598	0.072252	1341
BMgn006734	0.067729	0.067763	1342
BMgn007245	0.067754	0.06779	1343
BMgn006013	0.067789	0.072428	1344
BMgn008977	0.068001	0.068029	1345
BMgn009189	0.068175	0.068191	1346
BMgn004799	0.068177	0.10705	1347
BMgn010209	0.068242	0.086641	1348
BMgn002352	0.06827	0.10713	1349
BMgn010781	0.06836	0.06838	1350
BMgn014240	0.068362	0.072969	1351
BMgn005612	0.068384	0.086756	1352
BMgn014228	0.068457	0.073077	1353
BMgn008078	0.068469	0.11722	1354
BMgn002872	0.068552	0.10732	1355
BMgn008326	0.068601	0.073208	1356
BMgn001880	0.06862	0.06864	1357
BMgn009138	0.068632	0.086973	1358
BMgn003032	0.068644	0.068661	1359
BMgn013675	0.068818	0.068839	1360
BMgn015515	0.068833	0.10754	1361
BMgn009034	0.068867	0.06888	1362
BMgn013401	0.068927	0.1076	1363
BMgn015809	0.068982	0.073584	1364
BMgn003824	0.069021	0.087298	1365
BMgn000724	0.06903	0.073642	1366
BMgn000161	0.069078	0.073675	1367
BMgn016260	0.069091	0.087365	1368
BMgn005665	0.069114	0.10774	1369
BMgn010404	0.069312	0.069343	1370
BMgn017166	0.069374	0.087616	1371
BMgn013447	0.069462	0.11871	1372
BMgn008933	0.069603	0.07417	1373
BMgn016856	0.069728	0.087891	1374
BMgn010785	0.069746	0.074299	1375
BMgn004816	0.069771	0.10824	1376
BMgn012251	0.069794	0.074344	1377
BMgn014087	0.069864	0.1083	1378
BMgn008261	0.06987	0.11933	1379
BMgn000573	0.069893	0.069893	1380
BMgn003821	0.070011	0.088123	1381
BMgn003474	0.070079	0.070078	1382
BMgn003368	0.07008	0.074628	1383
BMgn000733	0.070141	0.070131	1384
BMgn015096	0.070364	0.088409	1385
BMgn008191	0.070414	0.074936	1386
BMgn012643	0.070426	0.10876	1387
BMgn003146	0.070435	0.088477	1388
BMgn000477	0.070505	0.088526	1389
BMgn013941	0.070649	0.1205	1390
BMgn016930	0.070795	0.075287	1391
BMgn006772	0.070907	0.070905	1392
BMgn014430	0.070907	0.070905	1393
BMgn003499	0.071034	0.075493	1394
BMgn015973	0.071082	0.10923	1395
BMgn006707	0.071141	0.089065	1396
BMgn006321	0.071212	0.089119	1397
BMgn002179	0.071224	0.075683	1398
BMgn006519	0.071265	0.12146	1399
BMgn007769	0.071269	0.10937	1400
BMgn005985	0.071464	0.071443	1401
BMgn000533	0.071643	0.10967	1402
BMgn006252	0.071706	0.089546	1403
BMgn011672	0.071749	0.076184	1404
BMgn011328	0.071777	0.089607	1405
BMgn012127	0.071918	0.089719	1406
BMgn004625	0.071989	0.089773	1407
BMgn006365	0.072111	0.11002	1408
BMgn010153	0.07233	0.072313	1409
BMgn016102	0.072342	0.09009	1410
BMgn001385	0.072428	0.072418	1411
BMgn008745	0.072483	0.090219	1412
BMgn004970	0.072624	0.090359	1413
BMgn008057	0.072765	0.09046	1414
BMgn001849	0.072824	0.072811	1415
BMgn001418	0.072844	0.077175	1416
BMgn012181	0.072916	0.077242	1417
BMgn000706	0.072923	0.07291	1418
BMgn011229	0.072987	0.077304	1419
BMgn005260	0.07322	0.073204	1420
BMgn010745	0.073393	0.07336	1421
BMgn000828	0.073418	0.073388	1422
BMgn001582	0.07347	0.091032	1423
BMgn004774	0.073665	0.073656	1424
BMgn006912	0.073893	0.091412	1425
BMgn012740	0.073964	0.091478	1426
BMgn012083	0.074074	0.1115	1427
BMgn004902	0.074074	0.1115	1428
BMgn012753	0.074097	0.12573	1429
BMgn000703	0.07413	0.078332	1430
BMgn016557	0.074175	0.091639	1431
BMgn013007	0.074225	0.078422	1432
BMgn016724	0.074259	0.074248	1433
BMgn009012	0.074778	0.074755	1434
BMgn008810	0.07495	0.092291	1435
BMgn011453	0.075034	0.079177	1436
BMgn014410	0.0751	0.1123	1437
BMgn005992	0.075149	0.075118	1438
BMgn007618	0.075372	0.075345	1439
BMgn011974	0.075373	0.092653	1440
BMgn016995	0.07538	0.11252	1441
BMgn016532	0.075391	0.079552	1442
BMgn016080	0.075391	0.079552	1443
BMgn003580	0.075443	0.092722	1444
BMgn017149	0.075557	0.079707	1445
BMgn006846	0.075652	0.079808	1446
BMgn006542	0.075704	0.12821	1447
BMgn007090	0.075807	0.12836	1448
BMgn000951	0.075819	0.07998	1449
BMgn014650	0.075936	0.093161	1450
BMgn013717	0.076114	0.076114	1451
BMgn015700	0.076126	0.11313	1452
BMgn017242	0.076175	0.080324	1453
BMgn015038	0.076218	0.093411	1454
BMgn004735	0.076288	0.093472	1455
BMgn003218	0.076318	0.080455	1456
BMgn013511	0.076437	0.080561	1457
BMgn000493	0.076437	0.080561	1458
BMgn003272	0.076559	0.076572	1459
BMgn013111	0.076602	0.1308	1460
BMgn008142	0.076682	0.076709	1461
BMgn005125	0.076707	0.076731	1462
BMgn014806	0.076779	0.1136	1463
BMgn010481	0.076793	0.080867	1464
BMgn001509	0.07688	0.07691	1465
BMgn006770	0.07693	0.076973	1466
BMgn002793	0.076967	0.13011	1467
BMgn002202	0.077245	0.081277	1468
BMgn001401	0.0774	0.077436	1469
BMgn009706	0.077411	0.081449	1470
BMgn014555	0.077554	0.081574	1471
BMgn007379	0.077573	0.077622	1472
BMgn012914	0.077601	0.081623	1473
BMgn007724	0.077695	0.094703	1474
BMgn007632	0.077791	0.081786	1475
BMgn012933	0.077891	0.13151	1476
BMgn004817	0.077981	0.081956	1477
BMgn000116	0.078029	0.081996	1478
BMgn010774	0.078117	0.095082	1479
BMgn013430	0.078117	0.078188	1480
BMgn011338	0.078124	0.082088	1481
BMgn012832	0.078253	0.078333	1482
BMgn004225	0.078257	0.095207	1483
BMgn016438	0.078327	0.095262	1484
BMgn016507	0.078463	0.078542	1485
BMgn007327	0.078468	0.095374	1486
BMgn004831	0.078587	0.078664	1487
BMgn004765	0.078598	0.082528	1488
BMgn009600	0.078641	0.11498	1489
BMgn015810	0.078644	0.095546	1490
BMgn016099	0.078734	0.11506	1491
BMgn004242	0.078741	0.082666	1492
BMgn016318	0.07889	0.095773	1493
BMgn009505	0.078922	0.13302	1494
BMgn008096	0.078931	0.082868	1495
BMgn009777	0.079026	0.082952	1496
BMgn005317	0.079121	0.08303	1497
BMgn016704	0.079168	0.083069	1498
BMgn017173	0.079405	0.083298	1499
BMgn008152	0.079453	0.083344	1500
BMgn004128	0.079662	0.096427	1501
BMgn004763	0.079738	0.083596	1502
BMgn015172	0.079873	0.096599	1503
BMgn014923	0.079922	0.13458	1504
BMgn012425	0.079927	0.083772	1505
BMgn004159	0.079997	0.080078	1506
BMgn007726	0.079997	0.080078	1507
BMgn013013	0.080223	0.0969	1508
BMgn010855	0.080307	0.084116	1509
BMgn009532	0.080318	0.080398	1510
BMgn006056	0.0805	0.11637	1511
BMgn015254	0.08064	0.080704	1512
BMgn004654	0.080664	0.080724	1513
BMgn001553	0.080686	0.084486	1514
BMgn000270	0.080734	0.084525	1515
BMgn003399	0.080779	0.11657	1516
BMgn003311	0.080924	0.084709	1517
BMgn010819	0.08106	0.081105	1518
BMgn009438	0.081135	0.097662	1519
BMgn008211	0.081184	0.08495	1520
BMgn009372	0.081184	0.08495	1521
BMgn007529	0.081184	0.08495	1522
BMgn002366	0.081184	0.08495	1523
BMgn008678	0.081394	0.081442	1524
BMgn004160	0.081445	0.085198	1525
BMgn010400	0.081731	0.098178	1526
BMgn015066	0.081777	0.08552	1527
BMgn015696	0.081872	0.085607	1528
BMgn006142	0.081893	0.11744	1529
BMgn006979	0.082061	0.085799	1530
BMgn017431	0.082124	0.082176	1531
BMgn007305	0.082171	0.11764	1532
BMgn009129	0.082257	0.098602	1533
BMgn012526	0.082298	0.086011	1534
BMgn014367	0.082403	0.11781	1535
BMgn004215	0.082403	0.11781	1536
BMgn006445	0.08242	0.082444	1537
BMgn015224	0.082445	0.082474	1538
BMgn001626	0.082537	0.09884	1539
BMgn006826	0.082635	0.11797	1540
BMgn010638	0.082725	0.086404	1541
BMgn002359	0.082887	0.099119	1542
BMgn010318	0.082958	0.09918	1543
BMgn013803	0.083098	0.099303	1544
BMgn012066	0.083098	0.11831	1545
BMgn003775	0.083246	0.086884	1546
BMgn007428	0.083308	0.099499	1547
BMgn000281	0.083625	0.087229	1548
BMgn008148	0.083767	0.087368	1549
BMgn014564	0.083848	0.14065	1550
BMgn006376	0.083909	0.087505	1551
BMgn002431	0.083941	0.083932	1552
BMgn012641	0.084077	0.084071	1553
BMgn007335	0.084118	0.11909	1554
BMgn001038	0.084145	0.087709	1555
BMgn005695	0.08421	0.11917	1556
BMgn012814	0.084335	0.087901	1557
BMgn005828	0.084382	0.087943	1558
BMgn014718	0.084448	0.084441	1559
BMgn010615	0.084547	0.08453	1560
BMgn004574	0.084581	0.11944	1561
BMgn005368	0.084619	0.08817	1562
BMgn016479	0.084707	0.10066	1563
BMgn004793	0.084827	0.14219	1564
BMgn008091	0.084992	0.084952	1565
BMgn002040	0.085045	0.088543	1566
BMgn003467	0.085092	0.10099	1567
BMgn012999	0.085173	0.14274	1568
BMgn002765	0.085228	0.11993	1569
BMgn017087	0.085314	0.085278	1570
BMgn015405	0.085314	0.085278	1571
BMgn010715	0.085328	0.088815	1572
BMgn008570	0.085476	0.1013	1573
BMgn012373	0.085506	0.12013	1574
BMgn004290	0.085546	0.10135	1575
BMgn010263	0.085686	0.10148	1576
BMgn007886	0.085729	0.14406	1577
BMgn017455	0.085784	0.12031	1578
BMgn008397	0.085896	0.089341	1579
BMgn000883	0.086036	0.10177	1580
BMgn005237	0.086085	0.089516	1581
BMgn010760	0.08613	0.086108	1582
BMgn000140	0.086132	0.089554	1583
BMgn012016	0.086175	0.10188	1584
BMgn008579	0.086245	0.10194	1585
BMgn009377	0.086324	0.1445	1586
BMgn000326	0.086385	0.10205	1587
BMgn003508	0.086393	0.089807	1588
BMgn013082	0.086523	0.12091	1589
BMgn007933	0.086525	0.10216	1590
BMgn016614	0.086616	0.14533	1591
BMgn016176	0.086664	0.10229	1592
BMgn002675	0.086769	0.10237	1593
BMgn007207	0.087014	0.14552	1594
BMgn010858	0.087078	0.090456	1595
BMgn006233	0.087083	0.10263	1596
BMgn012468	0.087153	0.10268	1597
BMgn016211	0.087172	0.090555	1598
BMgn011962	0.087275	0.14594	1599
BMgn016710	0.087362	0.09073	1600
BMgn011700	0.087363	0.10285	1601
BMgn011263	0.087432	0.10293	1602
BMgn007976	0.08754	0.08749	1603
BMgn004968	0.087632	0.12172	1604
BMgn008181	0.087692	0.091061	1605
BMgn003336	0.087762	0.087716	1606
BMgn012841	0.087781	0.10321	1607
BMgn009732	0.087817	0.12187	1608
BMgn009324	0.087834	0.091202	1609
BMgn007702	0.087921	0.10333	1610
BMgn007601	0.087933	0.14692	1611
BMgn009851	0.08796	0.08793	1612
BMgn015019	0.087976	0.091333	1613
BMgn016043	0.088001	0.12202	1614
BMgn006288	0.088117	0.091455	1615
BMgn007695	0.08813	0.10352	1616
BMgn000474	0.088212	0.091541	1617
BMgn000456	0.088259	0.091601	1618
BMgn006421	0.088354	0.091694	1619
BMgn011693	0.08859	0.091921	1620
BMgn014236	0.088622	0.14797	1621
BMgn011380	0.088684	0.092011	1622
BMgn007749	0.088873	0.092184	1623
BMgn004262	0.088875	0.088839	1624
BMgn017119	0.088898	0.10415	1625
BMgn010103	0.088967	0.1042	1626
BMgn011156	0.089147	0.089124	1627
BMgn016581	0.08944	0.092727	1628
BMgn013886	0.08944	0.092727	1629
BMgn015831	0.08944	0.092727	1630
BMgn002255	0.08944	0.092727	1631
BMgn008878	0.089455	0.10461	1632
BMgn005166	0.089662	0.12327	1633
BMgn002316	0.089664	0.10478	1634
BMgn014729	0.089754	0.12333	1635
BMgn017063	0.089865	0.089854	1636
BMgn004769	0.089935	0.093197	1637
BMgn014698	0.090087	0.090092	1638
BMgn003316	0.0901	0.09336	1639
BMgn000836	0.090222	0.10526	1640
BMgn016874	0.090291	0.10531	1641
BMgn009363	0.090501	0.093749	1642
BMgn002332	0.090501	0.093749	1643
BMgn005297	0.090619	0.093861	1644
BMgn009302	0.090761	0.09399	1645
BMgn009158	0.090768	0.12411	1646
BMgn004090	0.090883	0.10583	1647
BMgn015221	0.090916	0.14969	1648
BMgn001043	0.091039	0.091061	1649
BMgn016805	0.091039	0.091061	1650
BMgn012427	0.091058	0.10599	1651
BMgn012444	0.091091	0.0943	1652
BMgn008915	0.091185	0.094386	1653
BMgn010075	0.091197	0.1061	1654
BMgn001688	0.091266	0.10616	1655
BMgn006196	0.091336	0.10621	1656
BMgn004095	0.091398	0.09142	1657
BMgn010326	0.091421	0.094604	1658
BMgn013940	0.091505	0.12466	1659
BMgn015010	0.091515	0.094692	1660
BMgn009379	0.091645	0.091664	1661
BMgn010411	0.091689	0.1248	1662
BMgn012453	0.091704	0.094857	1663
BMgn009666	0.091754	0.10656	1664
BMgn004174	0.091757	0.091769	1665
BMgn007385	0.091892	0.095028	1666
BMgn009245	0.091893	0.0919	1667
BMgn016622	0.091987	0.095116	1668
BMgn007996	0.092067	0.10684	1669
BMgn015592	0.092067	0.10684	1670
BMgn008390	0.092081	0.095206	1671
BMgn002093	0.092091	0.092097	1672
BMgn016373	0.092333	0.1253	1673
BMgn001558	0.092449	0.10713	1674
BMgn003151	0.092505	0.095606	1675
BMgn007864	0.092519	0.1072	1676
BMgn016644	0.092519	0.15076	1677
BMgn001426	0.092552	0.09565	1678
BMgn010136	0.092609	0.12552	1679
BMgn000091	0.092835	0.095919	1680
BMgn002174	0.092882	0.092865	1681
BMgn010210	0.092932	0.092918	1682
BMgn013570	0.09307	0.096162	1683
BMgn014314	0.093492	0.10804	1684
BMgn007269	0.093541	0.096598	1685
BMgn003469	0.09355	0.093536	1686
BMgn003670	0.093562	0.10811	1687
BMgn014636	0.093797	0.093788	1688
BMgn010773	0.09384	0.10834	1689
BMgn008712	0.093918	0.096948	1690
BMgn002723	0.093988	0.12659	1691
BMgn017296	0.094012	0.097043	1692
BMgn001174	0.094106	0.097137	1693
BMgn012005	0.094187	0.10861	1694
BMgn006736	0.094256	0.10867	1695
BMgn010480	0.094355	0.12685	1696
BMgn004555	0.094371	0.15655	1697
BMgn012604	0.09443	0.1088	1698
BMgn006369	0.094742	0.10907	1699
BMgn017315	0.09486	0.097864	1700
BMgn002216	0.094907	0.0979	1701
BMgn004676	0.094954	0.097949	1702
BMgn002503	0.095009	0.095006	1703
BMgn002032	0.095048	0.098038	1704
BMgn011940	0.095377	0.098341	1705
BMgn000808	0.0958	0.098738	1706
BMgn010981	0.095899	0.095881	1707
BMgn000696	0.095989	0.098905	1708
BMgn013557	0.096096	0.11023	1709
BMgn005436	0.096097	0.096068	1710
BMgn005034	0.096122	0.096098	1711
BMgn002841	0.09613	0.099014	1712
BMgn008946	0.096177	0.099055	1713
BMgn012893	0.096394	0.09637	1714
BMgn016181	0.096468	0.096456	1715
BMgn006091	0.096477	0.11054	1716
BMgn007413	0.096616	0.11067	1717
BMgn014969	0.096741	0.099577	1718
BMgn008536	0.096765	0.09675	1719
BMgn011679	0.096859	0.15381	1720
BMgn005348	0.096893	0.11088	1721
BMgn004214	0.097012	0.096985	1722
BMgn004764	0.097023	0.099854	1723
BMgn003102	0.097136	0.097108	1724
BMgn015758	0.097164	0.099983	1725
BMgn005197	0.097211	0.10003	1726
BMgn007960	0.097334	0.097304	1727
BMgn011798	0.097532	0.097496	1728
BMgn011027	0.097532	0.097496	1729
BMgn002977	0.097532	0.097496	1730
BMgn014168	0.097847	0.16168	1731
BMgn006172	0.097932	0.12962	1732
BMgn011077	0.098002	0.11184	1733
BMgn004421	0.09801	0.10079	1734
BMgn001530	0.098101	0.09805	1735
BMgn005330	0.098206	0.12982	1736
BMgn013228	0.098245	0.10101	1737
BMgn003348	0.098245	0.10101	1738
BMgn006717	0.098274	0.098237	1739
BMgn014358	0.098298	0.12989	1740
BMgn001837	0.098323	0.098282	1741
BMgn002855	0.098422	0.098381	1742
BMgn002205	0.09848	0.10124	1743
BMgn013373	0.098526	0.1013	1744
BMgn010979	0.09862	0.098593	1745
BMgn000002	0.098625	0.11239	1746
BMgn000400	0.098719	0.098703	1747
BMgn011774	0.098764	0.11251	1748
BMgn004527	0.098808	0.10155	1749
BMgn000805	0.098847	0.1303	1750
BMgn002752	0.098902	0.11263	1751
BMgn007947	0.098971	0.11269	1752
BMgn011114	0.099122	0.13054	1753
BMgn013061	0.099139	0.099125	1754
BMgn008468	0.099248	0.11293	1755
BMgn017161	0.099248	0.11293	1756
BMgn011819	0.099248	0.11293	1757
BMgn002460	0.099487	0.13081	1758
BMgn013485	0.099584	0.099598	1759
BMgn000648	0.099594	0.11323	1760
BMgn006694	0.099841	0.10253	1761
BMgn003221	0.099931	0.099945	1762
BMgn002505	0.099945	0.13115	1763
BMgn007079	0.099955	0.099974	1764
BMgn000139	0.10008	0.11364	1765
BMgn005584	0.10012	0.10277	1766
BMgn013055	0.10017	0.10281	1767
BMgn009417	0.10022	0.11375	1768
BMgn015484	0.10023	0.10024	1769
BMgn014072	0.10057	0.10058	1770
BMgn004315	0.10072	0.10073	1771
BMgn015621	0.10082	0.10082	1772
BMgn011130	0.10099	0.10356	1773
BMgn013658	0.10102	0.101	1774
BMgn005755	0.10105	0.11447	1775
BMgn005953	0.10119	0.10116	1776
BMgn007287	0.10129	0.10126	1777
BMgn009839	0.1013	0.10389	1778
BMgn013997	0.10151	0.10409	1779
BMgn001154	0.10151	0.10148	1780
BMgn007596	0.10162	0.1042	1781
BMgn002815	0.10181	0.10437	1782
BMgn017204	0.10184	0.1018	1783
BMgn016487	0.10186	0.13255	1784
BMgn007104	0.1019	0.10444	1785
BMgn008505	0.10193	0.10189	1786
BMgn012479	0.10195	0.13263	1787
BMgn008385	0.102	0.10454	1788
BMgn014012	0.10201	0.11531	1789
BMgn015131	0.10205	0.10458	1790
BMgn005629	0.10206	0.10201	1791
BMgn009643	0.10209	0.10463	1792
BMgn005150	0.10211	0.10206	1793
BMgn013127	0.10215	0.11542	1794
BMgn014140	0.10226	0.11551	1795
BMgn014586	0.10228	0.10223	1796
BMgn011831	0.10237	0.10489	1797
BMgn001419	0.10248	0.10243	1798
BMgn005445	0.10261	0.10512	1799
BMgn009369	0.10263	0.11583	1800
BMgn000990	0.10264	0.13315	1801
BMgn014253	0.10266	0.15788	1802
BMgn009191	0.1027	0.11589	1803
BMgn001537	0.10284	0.10534	1804
BMgn011601	0.10289	0.10538	1805
BMgn016665	0.1029	0.10284	1806
BMgn002666	0.10297	0.10291	1807
BMgn010841	0.10317	0.10564	1808
BMgn006050	0.10319	0.11629	1809
BMgn009321	0.10331	0.10578	1810
BMgn007110	0.10332	0.11642	1811
BMgn001912	0.10342	0.10333	1812
BMgn002915	0.10345	0.10591	1813
BMgn009322	0.10346	0.13378	1814
BMgn004798	0.10346	0.11655	1815
BMgn015109	0.10374	0.10365	1816
BMgn012358	0.10376	0.10368	1817
BMgn011789	0.10381	0.11685	1818
BMgn014408	0.10389	0.10381	1819
BMgn015369	0.10392	0.10633	1820
BMgn015086	0.10396	0.10387	1821
BMgn004193	0.10397	0.10637	1822
BMgn017409	0.10405	0.13423	1823
BMgn009144	0.10408	0.11708	1824
BMgn017570	0.10414	0.1343	1825
BMgn010515	0.10415	0.10655	1826
BMgn005380	0.10423	0.13438	1827
BMgn008349	0.10425	0.10663	1828
BMgn008320	0.10429	0.10668	1829
BMgn010837	0.10436	0.11731	1830
BMgn010928	0.10442	0.13453	1831
BMgn006197	0.10467	0.10703	1832
BMgn014343	0.10467	0.10703	1833
BMgn004950	0.1047	0.11761	1834
BMgn009159	0.10481	0.15941	1835
BMgn011863	0.10493	0.10482	1836
BMgn002785	0.10493	0.10482	1837
BMgn005724	0.10493	0.10482	1838
BMgn002364	0.10504	0.10738	1839
BMgn002347	0.10505	0.11791	1840
BMgn015021	0.10512	0.11798	1841
BMgn007623	0.10524	0.1352	1842
BMgn009067	0.10526	0.15972	1843
BMgn005667	0.10529	0.11812	1844
BMgn008270	0.10532	0.10761	1845
BMgn017374	0.10537	0.10766	1846
BMgn007073	0.10539	0.11821	1847
BMgn001943	0.1054	0.1053	1848
BMgn010909	0.10542	0.13534	1849
BMgn010914	0.10553	0.11834	1850
BMgn010275	0.10567	0.11845	1851
BMgn006511	0.10574	0.10801	1852
BMgn015694	0.10579	0.10806	1853
BMgn010740	0.10588	0.11861	1854
BMgn017114	0.10598	0.10824	1855
BMgn004839	0.10614	0.1359	1856
BMgn009022	0.10619	0.10606	1857
BMgn011426	0.10626	0.10848	1858
BMgn011449	0.10636	0.11903	1859
BMgn012400	0.10643	0.1191	1860
BMgn006532	0.10651	0.10639	1861
BMgn010754	0.10653	0.11918	1862
BMgn004887	0.10663	0.11927	1863
BMgn002564	0.10682	0.10903	1864
BMgn004452	0.10687	0.10909	1865
BMgn011882	0.10687	0.13648	1866
BMgn001321	0.10691	0.1068	1867
BMgn009730	0.10691	0.11951	1868
BMgn016903	0.10696	0.13656	1869
BMgn010164	0.10698	0.11958	1870
BMgn002221	0.10705	0.11964	1871
BMgn008101	0.10711	0.1197	1872
BMgn001566	0.10733	0.10955	1873
BMgn009224	0.10738	0.10728	1874
BMgn009719	0.10741	0.1612	1875
BMgn017569	0.10766	0.10987	1876
BMgn007125	0.10782	0.11002	1877
BMgn013023	0.10787	0.13727	1878
BMgn002829	0.10794	0.10786	1879
BMgn000888	0.10799	0.11017	1880
BMgn014198	0.10804	0.11022	1881
BMgn017310	0.10808	0.11026	1882
BMgn009967	0.10818	0.11035	1883
BMgn008022	0.10825	0.12069	1884
BMgn012177	0.10825	0.12069	1885
BMgn011558	0.10825	0.12069	1886
BMgn011732	0.10825	0.12069	1887
BMgn009045	0.10825	0.12069	1888
BMgn015281	0.10825	0.12069	1889
BMgn011692	0.10841	0.11055	1890
BMgn011100	0.10855	0.11067	1891
BMgn014371	0.1086	0.13784	1892
BMgn011023	0.10874	0.11087	1893
BMgn006991	0.10878	0.13798	1894
BMgn011046	0.10899	0.16232	1895
BMgn008436	0.10904	0.12137	1896
BMgn016818	0.10906	0.109	1897
BMgn016383	0.10911	0.10905	1898
BMgn013409	0.10914	0.13825	1899
BMgn013494	0.10916	0.10911	1900
BMgn001760	0.10918	0.1215	1901
BMgn005974	0.1092	0.11132	1902
BMgn016359	0.1093	0.17812	1903
BMgn013062	0.10941	0.13848	1904
BMgn002047	0.10952	0.12179	1905
BMgn017241	0.1096	0.10955	1906
BMgn013530	0.10969	0.13871	1907
BMgn003230	0.10977	0.10972	1908
BMgn016902	0.10978	0.13878	1909
BMgn003526	0.10986	0.12207	1910
BMgn015890	0.10993	0.11202	1911
BMgn017297	0.10993	0.12213	1912
BMgn007454	0.11014	0.11221	1913
BMgn009222	0.11014	0.12231	1914
BMgn009267	0.11028	0.12242	1915
BMgn009806	0.11048	0.12259	1916
BMgn006139	0.11054	0.11048	1917
BMgn007708	0.11058	0.11261	1918
BMgn001200	0.11058	0.11261	1919
BMgn014370	0.11068	0.1635	1920
BMgn017329	0.11068	0.13949	1921
BMgn000432	0.11077	0.13955	1922
BMgn000881	0.11081	0.11075	1923
BMgn000406	0.11082	0.12289	1924
BMgn014671	0.11086	0.13963	1925
BMgn012714	0.11096	0.1397	1926
BMgn014512	0.11102	0.16373	1927
BMgn003216	0.11124	0.12325	1928
BMgn011140	0.11136	0.11131	1929
BMgn016278	0.11136	0.11131	1930
BMgn014857	0.11137	0.12337	1931
BMgn013572	0.1114	0.11338	1932
BMgn004407	0.11149	0.11147	1933
BMgn016542	0.11155	0.11154	1934
BMgn014684	0.11165	0.1236	1935
BMgn015078	0.11199	0.1239	1936
BMgn014773	0.11205	0.11399	1937
BMgn014090	0.11213	0.12401	1938
BMgn007771	0.11222	0.14071	1939
BMgn005547	0.11261	0.12443	1940
BMgn002944	0.11267	0.14104	1941
BMgn008117	0.11277	0.11272	1942
BMgn014021	0.11288	0.11284	1943
BMgn002260	0.1131	0.11503	1944
BMgn013354	0.11317	0.11509	1945
BMgn010330	0.1136	0.12531	1946
BMgn004273	0.1136	0.12531	1947
BMgn004227	0.1136	0.16557	1948
BMgn012626	0.11377	0.11569	1949
BMgn004329	0.11391	0.12555	1950
BMgn014068	0.11399	0.14206	1951
BMgn010423	0.11412	0.14216	1952
BMgn002370	0.11415	0.11407	1953
BMgn012270	0.11425	0.12585	1954
BMgn015534	0.11447	0.11637	1955
BMgn013785	0.11452	0.1261	1956
BMgn016991	0.1147	0.1166	1957
BMgn004001	0.11473	0.11466	1958
BMgn011464	0.1148	0.11669	1959
BMgn010666	0.11487	0.11479	1960
BMgn009389	0.115	0.12652	1961
BMgn001273	0.11521	0.12668	1962
BMgn006590	0.11528	0.12674	1963
BMgn003263	0.11533	0.11521	1964
BMgn004971	0.1154	0.16689	1965
BMgn015505	0.1154	0.11725	1966
BMgn002816	0.11541	0.12685	1967
BMgn010531	0.11562	0.12703	1968
BMgn001148	0.11569	0.12709	1969
BMgn007876	0.11577	0.11758	1970
BMgn009735	0.11577	0.11758	1971
BMgn001276	0.11584	0.14346	1972
BMgn017004	0.11589	0.12725	1973
BMgn009108	0.11605	0.11786	1974
BMgn007435	0.11608	0.11597	1975
BMgn016009	0.11611	0.14366	1976
BMgn015312	0.1162	0.14373	1977
BMgn010317	0.11625	0.11615	1978
BMgn013170	0.11628	0.11617	1979
BMgn000558	0.11651	0.12774	1980
BMgn012459	0.11659	0.11644	1981
BMgn001929	0.11664	0.12786	1982
BMgn013642	0.11665	0.14409	1983
BMgn004808	0.1168	0.11858	1984
BMgn010555	0.11694	0.11871	1985
BMgn013628	0.11708	0.11885	1986
BMgn004986	0.11717	0.11894	1987
BMgn003609	0.11721	0.11706	1988
BMgn016131	0.11729	0.11714	1989
BMgn001798	0.11731	0.11907	1990
BMgn008562	0.11733	0.12844	1991
BMgn004679	0.11739	0.12851	1992
BMgn005336	0.11747	0.1173	1993
BMgn016657	0.11749	0.11924	1994
BMgn001994	0.11752	0.11735	1995
BMgn016619	0.11759	0.11935	1996
BMgn004447	0.1176	0.12867	1997
BMgn002250	0.11763	0.1194	1998
BMgn014577	0.11766	0.11751	1999
[truncated: 13,659 more rows]

## Sheet: sgRNA score in 30 ℃
sgRNA ID	Gene ID	score
gRNA_4155	BMgn000900	40.615
gRNA_83148	BMgn015706	35.699
gRNA_56412	BMgn010902	31.175
gRNA_70796	BMgn013499	30.28
gRNA_29312	BMgn006019	28.644
gRNA_82505	BMgn015597	28.029
gRNA_93897	BMgn017576	27.957
gRNA_3474	BMgn000753	26.802
gRNA_37742	BMgn007542	25.909
gRNA_36844	BMgn007386	25.419
gRNA_13972	BMgn003018	24.228
gRNA_29352	BMgn006026	23.847
gRNA_63895	BMgn012248	23.842
gRNA_77361	BMgn014720	23.395
gRNA_10076	BMgn002182	23.36
gRNA_47004	BMgn009205	22.823
gRNA_16491	BMgn003557	22.72
gRNA_5681	BMgn001234	22.615
gRNA_11756	BMgn002550	22.377
gRNA_84318	BMgn015906	21.992
gRNA_89583	BMgn016822	21.672
gRNA_38323	BMgn007643	20.868
gRNA_32344	BMgn006575	20.48
gRNA_29435	BMgn006040	20.438
gRNA_6445	BMgn001397	20.342
gRNA_46396	BMgn009091	20.307
gRNA_68058	BMgn013010	20.074
gRNA_50616	BMgn009856	20.063
gRNA_50458	BMgn009826	20.018
gRNA_58242	BMgn011237	19.84
gRNA_32477	BMgn006601	19.617
gRNA_49003	BMgn009568	19.541
gRNA_55594	BMgn010755	19.39
gRNA_64752	BMgn012403	19.328
gRNA_87240	BMgn016414	19.265
gRNA_70011	BMgn013360	19.222
gRNA_91851	BMgn017217	19.091
gRNA_49024	BMgn009572	18.98
gRNA_23499	BMgn004957	18.732
gRNA_10923	BMgn002372	18.662
gRNA_28901	BMgn005946	18.491
gRNA_87412	BMgn016444	18.423
gRNA_85577	BMgn016126	18.208
gRNA_8733	BMgn001887	18.207
gRNA_8723	BMgn001885	18.141
gRNA_19266	BMgn004167	17.944
gRNA_24810	BMgn005204	17.892
gRNA_30423	BMgn006219	17.777
gRNA_32593	BMgn006621	17.438
gRNA_4717	BMgn001023	17.091
gRNA_40013	BMgn007944	17.091
gRNA_40741	BMgn008074	16.871
gRNA_73943	BMgn014074	16.829
gRNA_27875	BMgn005756	16.561
gRNA_28457	BMgn005865	16.552
gRNA_2904	BMgn000629	16.505
gRNA_74270	BMgn014132	16.477
gRNA_36245	BMgn007276	16.461
gRNA_70682	BMgn013479	16.453
gRNA_6868	BMgn001489	16.407
gRNA_50360	BMgn009809	16.406
gRNA_70892	BMgn013515	16.346
gRNA_29806	BMgn006104	16.334
gRNA_56150	BMgn010853	16.155
gRNA_58604	BMgn011301	16.122
gRNA_37176	BMgn007446	16.084
gRNA_88367	BMgn016609	16.084
gRNA_88076	BMgn016559	16.039
gRNA_26642	BMgn005532	16.026
gRNA_53382	BMgn010370	15.999
gRNA_85210	BMgn016062	15.92
gRNA_20655	BMgn004446	15.819
gRNA_9063	BMgn001960	15.43
gRNA_62077	BMgn011924	15.421
gRNA_74371	BMgn014153	15.412
gRNA_79729	BMgn015123	15.403
gRNA_60302	BMgn011608	15.387
gRNA_56148	BMgn010853	15.377
gRNA_32834	BMgn006662	15.187
gRNA_87895	BMgn016528	15.128
gRNA_2900	BMgn000629	15
gRNA_88173	BMgn016575	14.957
gRNA_65542	BMgn012554	14.926
gRNA_497	BMgn000111	14.911
gRNA_61062	BMgn011746	14.899
gRNA_68980	BMgn013180	14.73
gRNA_31299	BMgn006378	14.657
gRNA_85580	BMgn016127	14.492
gRNA_47336	BMgn009269	14.46
gRNA_40747	BMgn008076	14.389
gRNA_93926	BMgn017582	14.373
gRNA_91860	BMgn017218	14.358
gRNA_3855	BMgn000837	14.334
gRNA_92887	BMgn017394	14.164
gRNA_65789	BMgn012599	14.148
gRNA_56272	BMgn010877	14.116
gRNA_78635	BMgn014936	14.109
gRNA_13451	BMgn002905	14.054
gRNA_5214	BMgn001132	14.05
gRNA_11792	BMgn002557	13.977
gRNA_13590	BMgn002934	13.921
gRNA_18755	BMgn004054	13.892
gRNA_34544	BMgn006970	13.884
gRNA_58846	BMgn011344	13.827
gRNA_75965	BMgn014461	13.824
gRNA_88054	BMgn016556	13.824
gRNA_82742	BMgn015638	13.793
gRNA_40806	BMgn008085	13.706
gRNA_74000	BMgn014084	13.662
gRNA_91844	BMgn017215	13.614
gRNA_4613	BMgn001000	13.583
gRNA_76907	BMgn014641	13.564
gRNA_70350	BMgn013422	13.557
gRNA_72653	BMgn013838	13.47
gRNA_5615	BMgn001219	13.47
gRNA_13258	BMgn002864	13.448
gRNA_87426	BMgn016447	13.425
gRNA_14188	BMgn003065	13.377
gRNA_64086	BMgn012279	13.31
gRNA_69993	BMgn013357	13.308
gRNA_10972	BMgn002382	13.258
gRNA_5098	BMgn001106	13.253
gRNA_46252	BMgn009065	13.206
gRNA_18474	BMgn003991	13.202
gRNA_45843	BMgn008991	13.181
gRNA_55467	BMgn010734	13.146
gRNA_33083	BMgn006709	13.109
gRNA_13506	BMgn002917	13.096
gRNA_63898	BMgn012248	13.044
gRNA_41662	BMgn008248	13.044
gRNA_8408	BMgn001819	13.035
gRNA_35350	BMgn007111	12.937
gRNA_1435	BMgn000313	12.893
gRNA_50481	BMgn009830	12.822
gRNA_78742	BMgn014954	12.817
gRNA_42043	BMgn008315	12.816
gRNA_53958	BMgn010474	12.732
gRNA_93913	BMgn017578	12.724
gRNA_709	BMgn000160	12.712
gRNA_33106	BMgn006714	12.618
gRNA_7596	BMgn001645	12.564
gRNA_6271	BMgn001360	12.522
gRNA_66741	BMgn012773	12.511
gRNA_45922	BMgn009005	12.405
gRNA_88393	BMgn016613	12.358
gRNA_52271	BMgn010169	12.298
gRNA_22462	BMgn004775	12.255
gRNA_25001	BMgn005239	12.245
gRNA_69028	BMgn013189	12.183
gRNA_86490	BMgn016284	12.125
gRNA_61856	BMgn011887	12.11
gRNA_101	BMgn000025	12.102
gRNA_64392	BMgn012338	12.086
gRNA_53826	BMgn010450	12.074
gRNA_55168	BMgn010681	11.97
gRNA_92939	BMgn017403	11.964
gRNA_16950	BMgn003656	11.936
gRNA_69466	BMgn013265	11.921
gRNA_4990	BMgn001080	11.86
gRNA_46637	BMgn009135	11.827
gRNA_43442	BMgn008564	11.797
gRNA_29502	BMgn006053	11.782
gRNA_42662	BMgn008423	11.766
gRNA_35873	BMgn007211	11.705
gRNA_11845	BMgn002568	11.699
gRNA_93928	BMgn017582	11.689
gRNA_88648	BMgn016658	11.684
gRNA_90035	BMgn016900	11.683
gRNA_3131	BMgn000681	11.678
gRNA_406	BMgn000089	11.662
gRNA_39554	BMgn007866	11.659
gRNA_32421	BMgn006589	11.541
gRNA_92060	BMgn017253	11.535
gRNA_58453	BMgn011274	11.518
gRNA_80118	BMgn015189	11.498
gRNA_20039	BMgn004334	11.446
gRNA_61367	BMgn011799	11.441
gRNA_18629	BMgn004026	11.43
gRNA_11665	BMgn002530	11.357
gRNA_73203	BMgn013933	11.336
gRNA_50585	BMgn009850	11.249
gRNA_57613	BMgn011116	11.233
gRNA_80111	BMgn015188	11.197
gRNA_66845	BMgn012791	11.16
gRNA_2700	BMgn000584	11.14
gRNA_91688	BMgn017188	11.117
gRNA_92941	BMgn017403	11.117
gRNA_34908	BMgn007034	11.084
gRNA_63837	BMgn012236	11.059
gRNA_17489	BMgn003770	11.027
gRNA_24699	BMgn005180	11.015
gRNA_47143	BMgn009231	10.985
gRNA_61894	BMgn011893	10.967
gRNA_21370	BMgn004576	10.964
gRNA_93910	BMgn017578	10.913
gRNA_91219	BMgn017105	10.902
gRNA_3969	BMgn000860	10.9
gRNA_688	BMgn000155	10.892
gRNA_57177	BMgn011035	10.89
gRNA_55977	BMgn010823	10.881
gRNA_15612	BMgn003373	10.868
gRNA_36344	BMgn007292	10.863
gRNA_66936	BMgn012809	10.862
gRNA_24441	BMgn005134	10.847
gRNA_74041	BMgn014092	10.83
gRNA_3925	BMgn000851	10.83
gRNA_9904	BMgn002141	10.814
gRNA_41524	BMgn008221	10.807
gRNA_38399	BMgn007656	10.8
gRNA_40684	BMgn008064	10.796
gRNA_92350	BMgn017302	10.773
gRNA_2394	BMgn000517	10.744
gRNA_82783	BMgn015645	10.731
gRNA_20377	BMgn004395	10.718
gRNA_60104	BMgn011575	10.716
gRNA_38929	BMgn007751	10.705
gRNA_46662	BMgn009139	10.685
gRNA_88853	BMgn016694	10.674
gRNA_12341	BMgn002672	10.654
gRNA_8099	BMgn001751	10.639
gRNA_76949	BMgn014649	10.63
gRNA_54749	BMgn010611	10.62
gRNA_25295	BMgn005288	10.616
gRNA_18482	BMgn003993	10.596
gRNA_50552	BMgn009845	10.594
gRNA_93329	BMgn017470	10.594
gRNA_39099	BMgn007783	10.587
gRNA_88682	BMgn016663	10.487
gRNA_76019	BMgn014471	10.46
gRNA_37778	BMgn007548	10.446
gRNA_58867	BMgn011348	10.365
gRNA_59876	BMgn011533	10.362
gRNA_26934	BMgn005583	10.311
gRNA_39997	BMgn007942	10.274
gRNA_88343	BMgn016605	10.227
gRNA_19308	BMgn004179	10.206
gRNA_71334	BMgn013594	10.198
gRNA_89236	BMgn016762	10.188
gRNA_6133	BMgn001331	10.172
gRNA_5532	BMgn001201	10.168
gRNA_27638	BMgn005715	10.168
gRNA_85144	BMgn016051	10.156
gRNA_91507	BMgn017157	10.124
gRNA_87225	BMgn016412	10.118
gRNA_25591	BMgn005341	10.107
gRNA_20795	BMgn004471	10.099
gRNA_2767	BMgn000600	10.066
gRNA_28385	BMgn005853	10.061
gRNA_31146	BMgn006352	10.047
gRNA_1742	BMgn000374	10.04
gRNA_81663	BMgn015452	10.018
gRNA_73022	BMgn013903	10.009
gRNA_32304	BMgn006568	9.9781
gRNA_15322	BMgn003312	9.9545
gRNA_34856	BMgn007024	9.9359
gRNA_41028	BMgn008126	9.8909
gRNA_58951	BMgn011364	9.8865
gRNA_53156	BMgn010328	9.8442
gRNA_91046	BMgn017076	9.7912
gRNA_26504	BMgn005506	9.7735
gRNA_49363	BMgn009630	9.7694
gRNA_16255	BMgn003507	9.7636
gRNA_16219	BMgn003500	9.7591
gRNA_66242	BMgn012678	9.725
gRNA_73296	BMgn013951	9.7203
gRNA_81999	BMgn015510	9.6893
gRNA_52890	BMgn010279	9.6875
gRNA_69272	BMgn013232	9.6866
gRNA_30034	BMgn006149	9.6759
gRNA_47809	BMgn009355	9.6618
gRNA_81866	BMgn015487	9.6503
gRNA_3710	BMgn000807	9.6272
gRNA_12122	BMgn002627	9.6265
gRNA_26447	BMgn005497	9.6117
gRNA_83126	BMgn015702	9.6068
gRNA_47895	BMgn009370	9.5683
gRNA_73959	BMgn014077	9.5385
gRNA_73128	BMgn013921	9.5341
gRNA_91911	BMgn017227	9.53
gRNA_52423	BMgn010194	9.5284
gRNA_930	BMgn000206	9.4622
gRNA_81363	BMgn015399	9.4602
gRNA_37801	BMgn007551	9.4531
gRNA_79183	BMgn015030	9.4519
gRNA_2879	BMgn000624	9.4409
gRNA_61917	BMgn011897	9.4302
gRNA_44325	BMgn008719	9.4285
gRNA_25501	BMgn005325	9.4219
gRNA_67326	BMgn012880	9.4219
gRNA_49830	BMgn009716	9.4194
gRNA_27499	BMgn005689	9.3941
gRNA_17836	BMgn003848	9.3718
gRNA_81886	BMgn015490	9.3695
gRNA_87644	BMgn016483	9.3104
gRNA_9420	BMgn002036	9.3035
gRNA_16496	BMgn003558	9.2929
gRNA_75477	BMgn014373	9.2929
gRNA_31117	BMgn006346	9.2146
gRNA_38717	BMgn007713	9.2088
gRNA_29701	BMgn006087	9.189
gRNA_59364	BMgn011440	9.1269
gRNA_9195	BMgn001986	9.1138
gRNA_5612	BMgn001219	9.1055
gRNA_44428	BMgn008738	9.1023
gRNA_24269	BMgn005101	9.1023
gRNA_68729	BMgn013135	9.0889
gRNA_25506	BMgn005326	9.0534
gRNA_77809	BMgn014796	9.0401
gRNA_60433	BMgn011631	9.0305
gRNA_25032	BMgn005244	9.0254
gRNA_20118	BMgn004350	9.0244
gRNA_511	BMgn000114	9.024
gRNA_5876	BMgn001275	9.0042
gRNA_11976	BMgn002596	9.0017
gRNA_33913	BMgn006857	8.9428
gRNA_64317	BMgn012324	8.9409
gRNA_22716	BMgn004819	8.9359
gRNA_83158	BMgn015708	8.9299
gRNA_36857	BMgn007388	8.9299
gRNA_6307	BMgn001368	8.9293
gRNA_60306	BMgn011608	8.9272
gRNA_42845	BMgn008455	8.9267
gRNA_63828	BMgn012234	8.9241
gRNA_43617	BMgn008597	8.9122
gRNA_77328	BMgn014714	8.9112
gRNA_64653	BMgn012384	8.8893
gRNA_46717	BMgn009148	8.8893
gRNA_77800	BMgn014794	8.8706
gRNA_68237	BMgn013044	8.8689
gRNA_58837	BMgn011343	8.8568
gRNA_58531	BMgn011287	8.8539
gRNA_88739	BMgn016674	8.8459
gRNA_88348	BMgn016605	8.8252
gRNA_8607	BMgn001860	8.8149
gRNA_59102	BMgn011391	8.7938
gRNA_36817	BMgn007381	8.7828
gRNA_69763	BMgn013316	8.7828
gRNA_56424	BMgn010905	8.7794
gRNA_47704	BMgn009336	8.7555
gRNA_29913	BMgn006126	8.755
gRNA_20230	BMgn004371	8.7456
gRNA_90585	BMgn016996	8.7452
gRNA_59486	BMgn011461	8.7155
gRNA_66376	BMgn012706	8.7137
gRNA_36768	BMgn007373	8.7026
gRNA_19426	BMgn004204	8.6973
gRNA_72170	BMgn013747	8.6738
gRNA_67418	BMgn012895	8.6676
gRNA_78529	BMgn014917	8.6523
gRNA_67859	BMgn012975	8.6385
gRNA_8283	BMgn001791	8.6274
gRNA_78818	BMgn014966	8.6138
gRNA_92537	BMgn017335	8.6106
gRNA_92066	BMgn017254	8.5914
gRNA_55870	BMgn010803	8.5888
gRNA_81056	BMgn015348	8.5697
gRNA_459	BMgn000104	8.556
gRNA_39502	BMgn007853	8.5545
gRNA_41119	BMgn008143	8.5509
gRNA_31723	BMgn006465	8.5489
gRNA_28096	BMgn005798	8.5427
gRNA_73609	BMgn014015	8.508
gRNA_10247	BMgn002220	8.5042
gRNA_66145	BMgn012659	8.4708
gRNA_72112	BMgn013735	8.4632
gRNA_39426	BMgn007840	8.4632
gRNA_71021	BMgn013537	8.4619
gRNA_80268	BMgn015214	8.4434
gRNA_61015	BMgn011738	8.4082
gRNA_32635	BMgn006628	8.3929
gRNA_57682	BMgn011128	8.3824
gRNA_7164	BMgn001550	8.3733
gRNA_9614	BMgn002080	8.3567
gRNA_86689	BMgn016317	8.3567
gRNA_61450	BMgn011814	8.3182
gRNA_18568	BMgn004010	8.3151
gRNA_68026	BMgn013005	8.3095
gRNA_4852	BMgn001051	8.2954
gRNA_81439	BMgn015412	8.2813
gRNA_9828	BMgn002124	8.262
gRNA_16061	BMgn003466	8.2601
gRNA_18311	BMgn003955	8.2501
gRNA_980	BMgn000216	8.2458
gRNA_22760	BMgn004827	8.2435
gRNA_64064	BMgn012276	8.2255
gRNA_87929	BMgn016533	8.207
gRNA_62033	BMgn011916	8.2045
gRNA_25889	BMgn005396	8.1887
gRNA_10460	BMgn002268	8.1866
gRNA_57951	BMgn011181	8.1642
gRNA_26010	BMgn005417	8.1615
gRNA_71417	BMgn013610	8.157
gRNA_37588	BMgn007516	8.1502
gRNA_93915	BMgn017579	8.1495
gRNA_11091	BMgn002407	8.1436
gRNA_78533	BMgn014918	8.1184
gRNA_78685	BMgn014944	8.1148
gRNA_28606	BMgn005894	8.0782
gRNA_2892	BMgn000627	8.0677
gRNA_93602	BMgn017521	8.0643
gRNA_86871	BMgn016349	8.0531
gRNA_47024	BMgn009208	8.0371
gRNA_41048	BMgn008131	8.0297
gRNA_7572	BMgn001639	8.0297
gRNA_17105	BMgn003689	8.0277
gRNA_71382	BMgn013603	8.0225
gRNA_31501	BMgn006420	7.9842
gRNA_17044	BMgn003676	7.977
gRNA_44144	BMgn008687	7.9724
gRNA_36559	BMgn007330	7.9694
gRNA_77711	BMgn014779	7.9668
gRNA_41140	BMgn008146	7.9579
gRNA_92776	BMgn017376	7.9562
gRNA_88356	BMgn016607	7.9528
gRNA_49177	BMgn009597	7.9487
gRNA_66298	BMgn012691	7.9476
gRNA_10344	BMgn002241	7.9353
gRNA_53680	BMgn010422	7.9306
gRNA_59148	BMgn011400	7.9306
gRNA_81141	BMgn015362	7.9306
gRNA_46076	BMgn009033	7.915
gRNA_85446	BMgn016104	7.9118
gRNA_35732	BMgn007184	7.9105
gRNA_38458	BMgn007669	7.9046
gRNA_81820	BMgn015479	7.8855
gRNA_82616	BMgn015616	7.8775
gRNA_17213	BMgn003712	7.872
gRNA_27901	BMgn005761	7.8588
gRNA_9866	BMgn002134	7.8588
gRNA_44289	BMgn008713	7.8539
gRNA_86089	BMgn016213	7.8417
gRNA_74458	BMgn014172	7.8015
gRNA_78954	BMgn014991	7.8013
gRNA_93881	BMgn017573	7.8001
gRNA_2500	BMgn000540	7.7967
gRNA_599	BMgn000132	7.789
gRNA_5683	BMgn001234	7.7711
gRNA_30782	BMgn006287	7.7674
gRNA_78456	BMgn014905	7.7634
gRNA_78593	BMgn014929	7.758
gRNA_9889	BMgn002138	7.7545
gRNA_205	BMgn000048	7.7468
gRNA_44172	BMgn008692	7.7237
gRNA_586	BMgn000129	7.7181
gRNA_46506	BMgn009113	7.7175
gRNA_20189	BMgn004362	7.7175
gRNA_61961	BMgn011904	7.7045
gRNA_87422	BMgn016446	7.6623
gRNA_73104	BMgn013917	7.6527
gRNA_13882	BMgn002999	7.6496
gRNA_43397	BMgn008557	7.6295
gRNA_46172	BMgn009051	7.6253
gRNA_84132	BMgn015875	7.6167
gRNA_84918	BMgn016012	7.6158
gRNA_49497	BMgn009654	7.611
gRNA_4638	BMgn001005	7.5947
gRNA_58005	BMgn011192	7.5899
gRNA_62789	BMgn012050	7.5829
gRNA_91005	BMgn017069	7.5758
gRNA_90096	BMgn016910	7.5654
gRNA_33663	BMgn006812	7.5539
gRNA_91674	BMgn017185	7.5538
gRNA_9053	BMgn001958	7.5478
gRNA_80909	BMgn015323	7.531
gRNA_24172	BMgn005080	7.5045
gRNA_55364	BMgn010716	7.5045
gRNA_84168	BMgn015881	7.4997
gRNA_78273	BMgn014875	7.479
gRNA_87907	BMgn016530	7.4516
gRNA_37672	BMgn007530	7.4432
gRNA_52869	BMgn010276	7.4432
gRNA_67167	BMgn012853	7.413
gRNA_71081	BMgn013547	7.4119
gRNA_60407	BMgn011626	7.4051
gRNA_71114	BMgn013554	7.3999
gRNA_26686	BMgn005541	7.398
gRNA_37678	BMgn007531	7.398
gRNA_54926	BMgn010640	7.398
gRNA_36849	BMgn007387	7.3956
gRNA_92936	BMgn017403	7.3909
gRNA_91385	BMgn017135	7.3819
gRNA_72581	BMgn013825	7.3761
gRNA_69265	BMgn013230	7.3728
gRNA_85697	BMgn016146	7.3628
gRNA_31634	BMgn006449	7.3617
gRNA_59362	BMgn011439	7.3505
gRNA_25217	BMgn005275	7.3493
gRNA_28071	BMgn005794	7.338
gRNA_19073	BMgn004124	7.3269
gRNA_15844	BMgn003420	7.3236
gRNA_13645	BMgn002946	7.309
gRNA_33396	BMgn006764	7.3071
gRNA_22892	BMgn004850	7.303
gRNA_3314	BMgn000718	7.2939
gRNA_27190	BMgn005631	7.2914
gRNA_24357	BMgn005119	7.2653
gRNA_55642	BMgn010763	7.2554
gRNA_11657	BMgn002528	7.2321
gRNA_37017	BMgn007420	7.2243
gRNA_74018	BMgn014088	7.204
gRNA_56239	BMgn010869	7.1989
gRNA_64216	BMgn012302	7.1894
gRNA_11330	BMgn002457	7.1361
gRNA_48676	BMgn009510	7.1338
gRNA_53248	BMgn010348	7.1272
gRNA_1541	BMgn000334	7.1246
gRNA_60935	BMgn011724	7.1245
gRNA_38592	BMgn007691	7.1206
gRNA_34309	BMgn006929	7.1018
gRNA_28775	BMgn005924	7.0931
gRNA_5407	BMgn001173	7.0801
gRNA_69894	BMgn013339	7.0793
gRNA_42121	BMgn008330	7.0784
gRNA_64800	BMgn012411	7.0649
gRNA_12631	BMgn002732	7.0555
gRNA_8289	BMgn001792	7.0551
gRNA_41294	BMgn008173	7.0544
gRNA_57301	BMgn011059	7.0392
gRNA_41696	BMgn008254	7.0356
gRNA_18705	BMgn004042	7.014
gRNA_26904	BMgn005578	7.0003
gRNA_82670	BMgn015625	6.9763
gRNA_25726	BMgn005366	6.9743
gRNA_81308	BMgn015390	6.9719
gRNA_86377	BMgn016264	6.9719
gRNA_26987	BMgn005591	6.9719
gRNA_48966	BMgn009562	6.9719
gRNA_7901	BMgn001709	6.9719
gRNA_59880	BMgn011533	6.971
gRNA_57940	BMgn011178	6.9634
gRNA_62013	BMgn011913	6.9496
gRNA_65502	BMgn012542	6.9204
gRNA_11003	BMgn002388	6.9199
gRNA_68588	BMgn013111	6.9147
gRNA_86469	BMgn016281	6.9074
gRNA_35077	BMgn007065	6.8993
gRNA_8351	BMgn001806	6.897
gRNA_74365	BMgn014152	6.8861
gRNA_71474	BMgn013621	6.883
gRNA_2084	BMgn000450	6.8722
gRNA_55482	BMgn010736	6.8667
gRNA_34962	BMgn007043	6.854
gRNA_89912	BMgn016878	6.852
gRNA_22120	BMgn004715	6.8392
gRNA_67635	BMgn012935	6.839
gRNA_33394	BMgn006764	6.8297
gRNA_57234	BMgn011045	6.8205
gRNA_38316	BMgn007642	6.8154
gRNA_58803	BMgn011337	6.8067
gRNA_74466	BMgn014174	6.8045
gRNA_91567	BMgn017167	6.804
gRNA_1522	BMgn000330	6.8006
gRNA_4484	BMgn000973	6.7942
gRNA_1959	BMgn000423	6.7919
gRNA_58044	BMgn011199	6.7914
gRNA_26517	BMgn005508	6.7764
gRNA_88377	BMgn016610	6.7722
gRNA_67794	BMgn012962	6.7658
gRNA_47205	BMgn009243	6.7588
gRNA_77290	BMgn014708	6.7588
gRNA_30730	BMgn006277	6.7588
gRNA_2507	BMgn000542	6.758
gRNA_90860	BMgn017043	6.7438
gRNA_87529	BMgn016464	6.7435
gRNA_58120	BMgn011216	6.7294
gRNA_65734	BMgn012588	6.7273
gRNA_16581	BMgn003576	6.7179
gRNA_68346	BMgn013067	6.6951
gRNA_44705	BMgn008792	6.6912
gRNA_40764	BMgn008078	6.6835
gRNA_88292	BMgn016596	6.6827
gRNA_64089	BMgn012280	6.6814
gRNA_2727	BMgn000589	6.6793
gRNA_8109	BMgn001754	6.6683
gRNA_10110	BMgn002189	6.6587
gRNA_87188	BMgn016406	6.6524
gRNA_31939	BMgn006504	6.6523
gRNA_70492	BMgn013447	6.6523
gRNA_73284	BMgn013949	6.6523
gRNA_71443	BMgn013614	6.6523
gRNA_59332	BMgn011434	6.6403
gRNA_41738	BMgn008261	6.6391
gRNA_9750	BMgn002108	6.6331
gRNA_52324	BMgn010177	6.6329
gRNA_12154	BMgn002634	6.6287
gRNA_48645	BMgn009504	6.6263
gRNA_66210	BMgn012672	6.6238
gRNA_76465	BMgn014553	6.6132
gRNA_61122	BMgn011756	6.5983
gRNA_68565	BMgn013107	6.5955
gRNA_80140	BMgn015193	6.5867
gRNA_53670	BMgn010420	6.5786
gRNA_7962	BMgn001722	6.5778
gRNA_56712	BMgn010954	6.5771
gRNA_50059	BMgn009754	6.5758
gRNA_2493	BMgn000539	6.5608
gRNA_53767	BMgn010437	6.5542
gRNA_13257	BMgn002864	6.5458
gRNA_55446	BMgn010729	6.5443
gRNA_39677	BMgn007886	6.533
gRNA_36032	BMgn007240	6.4786
gRNA_40210	BMgn007980	6.4767
gRNA_26297	BMgn005471	6.4742
gRNA_17969	BMgn003880	6.4742
gRNA_41587	BMgn008236	6.4701
gRNA_76025	BMgn014472	6.4654
gRNA_59758	BMgn011510	6.4599
gRNA_53779	BMgn010439	6.4532
gRNA_58978	BMgn011368	6.4508
gRNA_12502	BMgn002706	6.4408
gRNA_65469	BMgn012537	6.4393
gRNA_71470	BMgn013621	6.4393
gRNA_76571	BMgn014572	6.4393
gRNA_38746	BMgn007718	6.4393
gRNA_28603	BMgn005894	6.4393
gRNA_80999	BMgn015338	6.4345
gRNA_13439	BMgn002903	6.4202
gRNA_90249	BMgn016937	6.4153
gRNA_13480	BMgn002911	6.4102
gRNA_9293	BMgn002007	6.4097
gRNA_11012	BMgn002390	6.4095
gRNA_55757	BMgn010783	6.4091
gRNA_50765	BMgn009886	6.3969
gRNA_78915	BMgn014984	6.3813
gRNA_23945	BMgn005039	6.3802
gRNA_2920	BMgn000637	6.3729
gRNA_75363	BMgn014352	6.3678
gRNA_33228	BMgn006735	6.3529
gRNA_50890	BMgn009911	6.3476
gRNA_43955	BMgn008656	6.3414
gRNA_35225	BMgn007090	6.3327
gRNA_18069	BMgn003903	6.3327
gRNA_91850	BMgn017216	6.3327
gRNA_24305	BMgn005108	6.3327
gRNA_9970	BMgn002159	6.3327
gRNA_13974	BMgn003019	6.3247
gRNA_42625	BMgn008416	6.3194
gRNA_77936	BMgn014818	6.3174
gRNA_82528	BMgn015601	6.3153
gRNA_70268	BMgn013404	6.307
gRNA_41306	BMgn008175	6.306
gRNA_85514	BMgn016116	6.3008
gRNA_12916	BMgn002793	6.2899
gRNA_44531	BMgn008755	6.2864
gRNA_83008	BMgn015683	6.2851
gRNA_20863	BMgn004482	6.2808
gRNA_39165	BMgn007794	6.2758
gRNA_15481	BMgn003345	6.2634
gRNA_25037	BMgn005245	6.2579
gRNA_29	BMgn000006	6.2524
gRNA_3803	BMgn000827	6.2523
gRNA_62536	BMgn012008	6.252
gRNA_30666	BMgn006265	6.2497
gRNA_53275	BMgn010352	6.2486
gRNA_7508	BMgn001627	6.2469
gRNA_22888	BMgn004850	6.2408
gRNA_3058	BMgn000666	6.2391
gRNA_46151	BMgn009047	6.2355
gRNA_10767	BMgn002339	6.2309
gRNA_41036	BMgn008128	6.2262
gRNA_50279	BMgn009794	6.2262
gRNA_47456	BMgn009292	6.2197
gRNA_21243	BMgn004555	6.2193
gRNA_86874	BMgn016350	6.2185
gRNA_85790	BMgn016162	6.1886
gRNA_91503	BMgn017157	6.1841
gRNA_6833	BMgn001482	6.181
gRNA_22506	BMgn004783	6.1758
gRNA_85994	BMgn016197	6.1715
gRNA_53565	BMgn010401	6.1674
gRNA_42770	BMgn008441	6.159
gRNA_77120	BMgn014678	6.1532
gRNA_84531	BMgn015946	6.151
gRNA_15478	BMgn003345	6.148
gRNA_72080	BMgn013729	6.1471
gRNA_33766	BMgn006830	6.1466
gRNA_55556	BMgn010749	6.1329
gRNA_55063	BMgn010663	6.1256
gRNA_88323	BMgn016601	6.1249
gRNA_85082	BMgn016041	6.1249
gRNA_37557	BMgn007511	6.1079
gRNA_80090	BMgn015184	6.1024
gRNA_8282	BMgn001791	6.1019
gRNA_20765	BMgn004466	6.0974
gRNA_5160	BMgn001121	6.0886
gRNA_44420	BMgn008737	6.0878
gRNA_86294	BMgn016249	6.0868
gRNA_50357	BMgn009808	6.077
gRNA_74570	BMgn014193	6.0669
gRNA_58892	BMgn011354	6.0626
gRNA_617	BMgn000138	6.052
gRNA_91404	BMgn017138	6.0516
gRNA_92465	BMgn017322	6.043
gRNA_61411	BMgn011806	6.034
gRNA_25615	BMgn005345	6.017
gRNA_90604	BMgn017000	6.0158
gRNA_81783	BMgn015473	6.0157
gRNA_66968	BMgn012817	6.0137
gRNA_76528	BMgn014564	6.0132
gRNA_26673	BMgn005539	6.0132
gRNA_3825	BMgn000831	6.0132
gRNA_18980	BMgn004102	6.0132
gRNA_47817	BMgn009356	6.0132
gRNA_82755	BMgn015640	6.0132
gRNA_8213	BMgn001777	6.0132
gRNA_87884	BMgn016526	6.0132
gRNA_92302	BMgn017294	5.9969
gRNA_22596	BMgn004799	5.9965
gRNA_10827	BMgn002352	5.9922
gRNA_20933	BMgn004496	5.9867
gRNA_22558	BMgn004793	5.9861
gRNA_13298	BMgn002872	5.984
gRNA_92304	BMgn017294	5.9801
gRNA_67988	BMgn012999	5.9734
gRNA_82027	BMgn015515	5.9719
gRNA_70246	BMgn013401	5.9664
gRNA_28712	BMgn005914	5.9587
gRNA_27377	BMgn005665	5.9568
gRNA_67876	BMgn012978	5.9544
gRNA_31974	BMgn006510	5.9525
gRNA_51368	BMgn010005	5.9489
gRNA_67938	BMgn012989	5.948
gRNA_26270	BMgn005466	5.9477
gRNA_47933	BMgn009377	5.9402
gRNA_22700	BMgn004816	5.9312
gRNA_74015	BMgn014087	5.9286
gRNA_31911	BMgn006499	5.9269
gRNA_69700	BMgn013304	5.9202
gRNA_35803	BMgn007196	5.913
gRNA_35857	BMgn007207	5.9124
gRNA_2214	BMgn000476	5.9061
gRNA_66053	BMgn012643	5.9018
gRNA_66620	BMgn012753	5.8987
gRNA_85493	BMgn016112	5.8687
gRNA_60683	BMgn011677	5.8637
gRNA_40312	BMgn007999	5.8552
gRNA_66740	BMgn012773	5.8516
gRNA_38076	BMgn007601	5.8499
gRNA_84692	BMgn015973	5.8374
gRNA_90432	BMgn016970	5.8306
gRNA_39019	BMgn007769	5.8281
gRNA_36563	BMgn007331	5.8266
gRNA_12464	BMgn002698	5.815
gRNA_74797	BMgn014236	5.8117
gRNA_2470	BMgn000533	5.811
gRNA_61065	BMgn011746	5.8096
gRNA_13320	BMgn002878	5.8069
gRNA_91883	BMgn017223	5.8059
gRNA_62194	BMgn011947	5.8056
gRNA_31217	BMgn006365	5.8049
gRNA_12711	BMgn002749	5.8001
gRNA_70074	BMgn013372	5.798
gRNA_12	BMgn000003	5.7975
gRNA_77321	BMgn014713	5.7809
gRNA_78450	BMgn014904	5.7798
gRNA_4647	BMgn001007	5.7785
gRNA_49998	BMgn009744	5.7615
gRNA_76685	BMgn014600	5.7557
gRNA_87750	BMgn016502	5.7546
gRNA_78722	BMgn014950	5.7511
gRNA_23425	BMgn004944	5.7376
gRNA_72159	BMgn013745	5.7305
gRNA_67651	BMgn012938	5.7251
gRNA_80307	BMgn015221	5.7196
gRNA_11916	BMgn002584	5.7169
gRNA_82373	BMgn015574	5.7092
gRNA_86542	BMgn016293	5.7075
gRNA_90434	BMgn016970	5.7016
gRNA_34721	BMgn006999	5.6971
gRNA_462	BMgn000104	5.6936
gRNA_23186	BMgn004902	5.6936
gRNA_62967	BMgn012083	5.6936
gRNA_86928	BMgn016359	5.6912
gRNA_88169	BMgn016575	5.6876
gRNA_82656	BMgn015623	5.6876
gRNA_13306	BMgn002875	5.6857
gRNA_8036	BMgn001738	5.6856
gRNA_88578	BMgn016644	5.6821
gRNA_6238	BMgn001354	5.6807
gRNA_84583	BMgn015954	5.6803
gRNA_17686	BMgn003811	5.6697
gRNA_75673	BMgn014410	5.6636
gRNA_39868	BMgn007920	5.6474
gRNA_49054	BMgn009577	5.6177
gRNA_90575	BMgn016995	5.6082
gRNA_1042	BMgn000229	5.601
gRNA_92495	BMgn017327	5.5978
gRNA_37601	BMgn007518	5.5903
gRNA_67833	BMgn012970	5.5873
gRNA_78710	BMgn014948	5.5871
gRNA_26809	BMgn005562	5.5871
gRNA_35057	BMgn007062	5.5871
gRNA_3836	BMgn000834	5.5871
gRNA_31978	BMgn006510	5.5871
gRNA_18778	BMgn004058	5.5871
gRNA_83114	BMgn015700	5.5871
gRNA_185	BMgn000044	5.5871
gRNA_44707	BMgn008792	5.5832
gRNA_60437	BMgn011632	5.5829
gRNA_77869	BMgn014806	5.5774
gRNA_82001	BMgn015510	5.573
gRNA_9593	BMgn002076	5.572
gRNA_63121	BMgn012110	5.5659
gRNA_539	BMgn000120	5.564
gRNA_38450	BMgn007666	5.5633
gRNA_20590	BMgn004434	5.5613
gRNA_4145	BMgn000898	5.5613
gRNA_65567	BMgn012558	5.5537
gRNA_21649	BMgn004631	5.5502
gRNA_53684	BMgn010422	5.5438
gRNA_38129	BMgn007610	5.5387
gRNA_43367	BMgn008552	5.5372
gRNA_87656	BMgn016486	5.5346
gRNA_20430	BMgn004404	5.5252
gRNA_45816	BMgn008986	5.5247
gRNA_60694	BMgn011679	5.5237
gRNA_91386	BMgn017135	5.5235
gRNA_91265	BMgn017113	5.5228
gRNA_81474	BMgn015418	5.5196
gRNA_49196	BMgn009600	5.5087
gRNA_85418	BMgn016099	5.5004
gRNA_50654	BMgn009863	5.4968
gRNA_90089	BMgn016909	5.4963
gRNA_32623	BMgn006626	5.4897
gRNA_51446	BMgn010020	5.4888
gRNA_39455	BMgn007845	5.4806
gRNA_40229	BMgn007984	5.4806
gRNA_82530	BMgn015601	5.4786
gRNA_39656	BMgn007883	5.4784
gRNA_52134	BMgn010146	5.4781
gRNA_65067	BMgn012463	5.4744
gRNA_92305	BMgn017294	5.4718
gRNA_67728	BMgn012951	5.4715
gRNA_17210	BMgn003711	5.47
gRNA_70389	BMgn013429	5.4657
gRNA_37555	BMgn007510	5.4653
gRNA_13096	BMgn002831	5.4587
gRNA_16373	BMgn003532	5.4572
gRNA_42836	BMgn008453	5.4514
gRNA_29517	BMgn006056	5.4487
gRNA_48846	BMgn009540	5.4487
gRNA_17440	BMgn003759	5.4486
gRNA_15745	BMgn003399	5.4435
gRNA_20595	BMgn004434	5.4378
gRNA_51571	BMgn010043	5.4355
gRNA_26078	BMgn005431	5.4348
gRNA_73861	BMgn014060	5.4348
gRNA_15510	BMgn003351	5.4331
gRNA_18968	BMgn004099	5.4261
gRNA_57747	BMgn011141	5.4239
gRNA_43181	BMgn008517	5.4114
gRNA_93007	BMgn017414	5.4097
gRNA_55149	BMgn010678	5.4085
gRNA_79168	BMgn015027	5.4073
gRNA_29996	BMgn006142	5.4029
gRNA_26006	BMgn005416	5.3998
gRNA_27322	BMgn005656	5.3971
gRNA_36416	BMgn007305	5.3934
gRNA_17558	BMgn003784	5.374
gRNA_19478	BMgn004215	5.374
gRNA_92081	BMgn017256	5.374
gRNA_75443	BMgn014367	5.374
gRNA_33740	BMgn006826	5.3689
gRNA_64593	BMgn012374	5.3687
gRNA_56747	BMgn010960	5.3582
gRNA_78329	BMgn014884	5.3527
gRNA_74893	BMgn014253	5.3497
gRNA_62868	BMgn012066	5.3464
gRNA_51927	BMgn010110	5.3411
gRNA_28819	BMgn005932	5.3365
gRNA_56301	BMgn010882	5.3358
gRNA_13215	BMgn002856	5.3316
gRNA_56290	BMgn010880	5.3288
gRNA_49644	BMgn009684	5.3253
gRNA_34976	BMgn007046	5.3192
gRNA_10191	BMgn002207	5.3178
gRNA_83119	BMgn015701	5.2962
gRNA_48649	BMgn009505	5.2876
gRNA_36585	BMgn007335	5.2778
gRNA_27531	BMgn005695	5.2722
gRNA_27145	BMgn005623	5.2691
gRNA_93359	BMgn017475	5.2687
gRNA_86070	BMgn016210	5.2675
gRNA_21356	BMgn004574	5.2675
gRNA_23019	BMgn004872	5.2675
gRNA_46777	BMgn009159	5.2608
gRNA_81351	BMgn015397	5.2543
gRNA_34703	BMgn006996	5.2509
gRNA_11054	BMgn002398	5.238
gRNA_46267	BMgn009067	5.2315
gRNA_12787	BMgn002765	5.2298
gRNA_10237	BMgn002218	5.2273
gRNA_29832	BMgn006110	5.2273
gRNA_64583	BMgn012373	5.2175
gRNA_13672	BMgn002952	5.2161
gRNA_64934	BMgn012439	5.2117
gRNA_93245	BMgn017455	5.2045
gRNA_77311	BMgn014711	5.198
gRNA_58185	BMgn011227	5.1892
gRNA_85521	BMgn016117	5.1892
gRNA_59444	BMgn011454	5.1866
gRNA_76138	BMgn014491	5.1852
gRNA_37858	BMgn007563	5.1852
gRNA_3492	BMgn000758	5.1836
gRNA_68429	BMgn013082	5.1811
gRNA_2212	BMgn000476	5.1809
gRNA_25466	BMgn005319	5.1791
gRNA_11510	BMgn002499	5.1755
gRNA_49847	BMgn009719	5.1656
gRNA_21464	BMgn004596	5.1624
gRNA_49736	BMgn009699	5.161
gRNA_93355	BMgn017475	5.161
gRNA_42109	BMgn008328	5.1604
gRNA_70941	BMgn013523	5.16
gRNA_4745	BMgn001029	5.1549
gRNA_92514	BMgn017331	5.145
gRNA_23570	BMgn004968	5.1448
gRNA_25567	BMgn005337	5.1439
gRNA_49925	BMgn009732	5.1424
gRNA_89115	BMgn016741	5.1418
gRNA_85095	BMgn016043	5.1406
gRNA_63571	BMgn012189	5.1402
gRNA_57235	BMgn011046	5.1387
gRNA_74641	BMgn014207	5.1309
gRNA_155	BMgn000038	5.1229
gRNA_33657	BMgn006811	5.1102
gRNA_52701	BMgn010245	5.1077
gRNA_81529	BMgn015427	5.1066
gRNA_8014	BMgn001733	5.0971
gRNA_47832	BMgn009359	5.0956
gRNA_66342	BMgn012699	5.0951
gRNA_14348	BMgn003099	5.0911
gRNA_15235	BMgn003293	5.09
gRNA_66479	BMgn012725	5.0851
gRNA_16374	BMgn003532	5.0837
gRNA_70908	BMgn013518	5.0744
gRNA_55100	BMgn010669	5.0723
gRNA_75459	BMgn014370	5.07
gRNA_24623	BMgn005166	5.0696
gRNA_77415	BMgn014729	5.0659
gRNA_76231	BMgn014512	5.0646
gRNA_52508	BMgn010209	5.0624
gRNA_7515	BMgn001628	5.0606
gRNA_27091	BMgn005612	5.0569
gRNA_6589	BMgn001428	5.0545
gRNA_59111	BMgn011393	5.0545
gRNA_22951	BMgn004861	5.0545
gRNA_46656	BMgn009138	5.0545
gRNA_5730	BMgn001243	5.0545
gRNA_89303	BMgn016773	5.0545
gRNA_46768	BMgn009158	5.0544
gRNA_58112	BMgn011215	5.0517
gRNA_17744	BMgn003824	5.0477
gRNA_86350	BMgn016260	5.0474
gRNA_15415	BMgn003331	5.0456
gRNA_92729	BMgn017368	5.0445
gRNA_83779	BMgn015814	5.0439
gRNA_91561	BMgn017166	5.0387
gRNA_73233	BMgn013940	5.0371
gRNA_40877	BMgn008098	5.0306
gRNA_53620	BMgn010411	5.0302
gRNA_20808	BMgn004473	5.0256
gRNA_89776	BMgn016856	5.0243
gRNA_19532	BMgn004227	5.0101
gRNA_28814	BMgn005932	5.0096
gRNA_24601	BMgn005163	5.0082
gRNA_17729	BMgn003821	5.0056
gRNA_87007	BMgn016373	5.0024
gRNA_52166	BMgn010151	4.9999
gRNA_72229	BMgn013761	4.9952
gRNA_52073	BMgn010136	4.9947
gRNA_79566	BMgn015096	4.991
gRNA_14551	BMgn003146	4.9884
gRNA_2220	BMgn000477	4.9859
gRNA_76558	BMgn014570	4.9839
gRNA_32289	BMgn006566	4.9782
gRNA_80747	BMgn015296	4.9732
gRNA_65521	BMgn012546	4.9714
gRNA_23583	BMgn004971	4.9705
gRNA_72091	BMgn013731	4.9705
gRNA_7266	BMgn001570	4.9705
gRNA_71747	BMgn013673	4.9643
gRNA_33072	BMgn006707	4.9504
gRNA_30971	BMgn006321	4.9497
gRNA_21470	BMgn004598	4.9479
gRNA_42649	BMgn008420	4.9479
gRNA_12583	BMgn002723	4.9479
gRNA_78760	BMgn014957	4.9465
gRNA_88801	BMgn016685	4.9399
gRNA_53996	BMgn010480	4.9398
gRNA_30602	BMgn006252	4.9385
gRNA_58753	BMgn011328	4.9364
gRNA_86823	BMgn016341	4.9346
gRNA_63213	BMgn012127	4.9268
gRNA_21613	BMgn004625	4.9227
gRNA_69218	BMgn013222	4.9165
gRNA_14633	BMgn003162	4.9133
gRNA_44258	BMgn008706	4.9078
gRNA_67727	BMgn012951	4.9076
gRNA_85437	BMgn016102	4.9069
gRNA_62526	BMgn012006	4.9061
gRNA_44473	BMgn008745	4.9011
gRNA_92940	BMgn017403	4.9005
gRNA_23581	BMgn004970	4.8987
gRNA_3068	BMgn000668	4.8927
gRNA_40641	BMgn008057	4.8857
gRNA_66163	BMgn012662	4.8709
gRNA_90271	BMgn016940	4.8683
gRNA_79267	BMgn015044	4.8678
gRNA_39908	BMgn007927	4.8612
gRNA_84765	BMgn015986	4.8587
gRNA_50205	BMgn009781	4.8514
gRNA_27715	BMgn005729	4.85
gRNA_78698	BMgn014946	4.8416
gRNA_7316	BMgn001582	4.8414
gRNA_31265	BMgn006373	4.8414
gRNA_18124	BMgn003915	4.8414
gRNA_57986	BMgn011189	4.8399
gRNA_8122	BMgn001757	4.8262
gRNA_86012	BMgn016200	4.8218
gRNA_67038	BMgn012831	4.8209
gRNA_34215	BMgn006912	4.8193
gRNA_66547	BMgn012740	4.8132
gRNA_44824	BMgn008813	4.8102
gRNA_80261	BMgn015213	4.8102
gRNA_88063	BMgn016557	4.8061
gRNA_17547	BMgn003782	4.8051
gRNA_2269	BMgn000489	4.8038
gRNA_30159	BMgn006172	4.7909
gRNA_12623	BMgn002731	4.7872
gRNA_91376	BMgn017133	4.7865
gRNA_25531	BMgn005330	4.7832
gRNA_75394	BMgn014358	4.7786
gRNA_55313	BMgn010707	4.7764
gRNA_32983	BMgn006690	4.7763
gRNA_75646	BMgn014405	4.7724
gRNA_44807	BMgn008810	4.7722
gRNA_11776	BMgn002554	4.7715
gRNA_3702	BMgn000805	4.7651
gRNA_2040	BMgn000440	4.7615
gRNA_57054	BMgn011014	4.7599
gRNA_57610	BMgn011114	4.7478
gRNA_62343	BMgn011974	4.7455
gRNA_16599	BMgn003580	4.7404
gRNA_58343	BMgn011256	4.7383
gRNA_11345	BMgn002460	4.7378
gRNA_77452	BMgn014735	4.7377
gRNA_33931	BMgn006860	4.7349
gRNA_78882	BMgn014978	4.7349
gRNA_70371	BMgn013425	4.7349
gRNA_7807	BMgn001690	4.7349
gRNA_76957	BMgn014650	4.7349
gRNA_29543	BMgn006060	4.7349
gRNA_11539	BMgn002505	4.7349
gRNA_79234	BMgn015038	4.732
gRNA_22227	BMgn004735	4.7244
gRNA_79031	BMgn015004	4.7239
gRNA_77831	BMgn014799	4.7197
gRNA_20322	BMgn004386	4.7089
gRNA_82722	BMgn015634	4.6988
gRNA_69731	BMgn013310	4.6988
gRNA_84474	BMgn015935	4.6975
gRNA_30305	BMgn006199	4.6935
gRNA_2018	BMgn000436	4.6922
gRNA_11677	BMgn002532	4.692
gRNA_7689	BMgn001664	4.6915
gRNA_23203	BMgn004905	4.6863
gRNA_72129	BMgn013738	4.6854
gRNA_53349	BMgn010364	4.6831
gRNA_52791	BMgn010261	4.679
gRNA_46363	BMgn009084	4.6721
gRNA_87665	BMgn016487	4.6682
gRNA_65137	BMgn012479	4.6671
gRNA_16375	BMgn003532	4.6636
gRNA_40439	BMgn008020	4.663
gRNA_38784	BMgn007724	4.6611
gRNA_34741	BMgn007002	4.6539
gRNA_30774	BMgn006284	4.6502
gRNA_78437	BMgn014902	4.6457
gRNA_8994	BMgn001944	4.6417
gRNA_4563	BMgn000990	4.6417
gRNA_55703	BMgn010774	4.6344
gRNA_36254	BMgn007277	4.634
gRNA_19525	BMgn004225	4.6307
gRNA_87374	BMgn016438	4.6302
gRNA_55427	BMgn010726	4.6294
gRNA_36542	BMgn007327	4.6289
gRNA_83188	BMgn015713	4.6284
gRNA_22879	BMgn004848	4.6284
gRNA_83751	BMgn015810	4.6284
gRNA_47626	BMgn009322	4.6284
gRNA_12998	BMgn002811	4.6253
gRNA_86691	BMgn016318	4.625
gRNA_29067	BMgn005977	4.623
gRNA_84869	BMgn016004	4.6205
gRNA_92975	BMgn017409	4.62
gRNA_93868	BMgn017570	4.6198
gRNA_25803	BMgn005380	4.6184
gRNA_20857	BMgn004481	4.6166
gRNA_19688	BMgn004264	4.6166
gRNA_56555	BMgn010928	4.6166
gRNA_60879	BMgn011712	4.6151
gRNA_7053	BMgn001528	4.6131
gRNA_19096	BMgn004128	4.6084
gRNA_51144	BMgn009963	4.6067
gRNA_55062	BMgn010663	4.6047
gRNA_80022	BMgn015172	4.6005
gRNA_13244	BMgn002862	4.5974
gRNA_38205	BMgn007623	4.5873
gRNA_72995	BMgn013899	4.5858
gRNA_56448	BMgn010909	4.5835
gRNA_68074	BMgn013013	4.5777
gRNA_77837	BMgn014800	4.5767
gRNA_37454	BMgn007494	4.5662
gRNA_86433	BMgn016275	4.5645
gRNA_52665	BMgn010236	4.5642
gRNA_48850	BMgn009540	4.5633
gRNA_67729	BMgn012951	4.5602
gRNA_22830	BMgn004839	4.5564
gRNA_88904	BMgn016703	4.5507
gRNA_33138	BMgn006719	4.5502
gRNA_2044	BMgn000441	4.5476
gRNA_21883	BMgn004673	4.5474
gRNA_10837	BMgn002354	4.5436
gRNA_48260	BMgn009438	4.532
gRNA_90598	BMgn016999	4.5316
gRNA_61832	BMgn011882	4.5285
gRNA_90054	BMgn016903	4.526
gRNA_89006	BMgn016721	4.5258
gRNA_34868	BMgn007026	4.5247
gRNA_24184	BMgn005083	4.5247
gRNA_43831	BMgn008635	4.5219
gRNA_3822	BMgn000831	4.5219
gRNA_33624	BMgn006806	4.5219
gRNA_53557	BMgn010400	4.5219
gRNA_86667	BMgn016314	4.5194
gRNA_45840	BMgn008990	4.5184
gRNA_68133	BMgn013023	4.5122
gRNA_92494	BMgn017327	4.5103
gRNA_81667	BMgn015453	4.5085
gRNA_46601	BMgn009129	4.5075
gRNA_17810	BMgn003841	4.5068
gRNA_15894	BMgn003431	4.4963
gRNA_41328	BMgn008179	4.4917
gRNA_7504	BMgn001626	4.4909
gRNA_75463	BMgn014371	4.4905
gRNA_67055	BMgn012834	4.4897
gRNA_34671	BMgn006991	4.4873
gRNA_74587	BMgn014197	4.4871
gRNA_10862	BMgn002359	4.4814
gRNA_53093	BMgn010318	4.4798
gRNA_70299	BMgn013409	4.4794
gRNA_72463	BMgn013803	4.4727
gRNA_86753	BMgn016329	4.4705
gRNA_68312	BMgn013062	4.47
gRNA_37065	BMgn007428	4.4655
gRNA_4449	BMgn000966	4.462
gRNA_70979	BMgn013530	4.4528
gRNA_90049	BMgn016902	4.4525
gRNA_65466	BMgn012536	4.4483
gRNA_57225	BMgn011044	4.4428
gRNA_12205	BMgn002644	4.4405
gRNA_64435	BMgn012345	4.4381
gRNA_29690	BMgn006085	4.4358
gRNA_24811	BMgn005204	4.4307
gRNA_65498	BMgn012541	4.4295
gRNA_93344	BMgn017473	4.4288
gRNA_11557	BMgn002508	4.4281
gRNA_92507	BMgn017329	4.4277
gRNA_2001	BMgn000432	4.4259
gRNA_77077	BMgn014671	4.4259
gRNA_66419	BMgn012714	4.4218
gRNA_20806	BMgn004473	4.4215
gRNA_52782	BMgn010259	4.4213
gRNA_48125	BMgn009412	4.421
gRNA_87615	BMgn016479	4.4172
gRNA_9991	BMgn002163	4.4158
gRNA_29141	BMgn005989	4.4153
gRNA_88796	BMgn016684	4.4153
gRNA_67498	BMgn012911	4.4153
gRNA_36069	BMgn007246	4.4153
gRNA_25872	BMgn005393	4.4153
gRNA_16070	BMgn003467	4.4153
gRNA_36445	BMgn007310	4.4153
gRNA_76083	BMgn014482	4.4153
gRNA_39027	BMgn007771	4.4098
gRNA_43475	BMgn008570	4.4091
gRNA_19819	BMgn004290	4.4088
gRNA_6150	BMgn001334	4.4079
gRNA_52806	BMgn010263	4.4022
gRNA_13633	BMgn002944	4.4016
gRNA_63227	BMgn012129	4.4012
gRNA_78116	BMgn014848	4.3969
gRNA_66809	BMgn012785	4.3954
gRNA_4085	BMgn000883	4.3909
gRNA_77726	BMgn014782	4.3906
gRNA_62586	BMgn012016	4.3866
gRNA_43520	BMgn008579	4.3853
gRNA_41413	BMgn008196	4.3843
gRNA_1499	BMgn000326	4.3817
gRNA_5943	BMgn001290	4.3801
gRNA_39946	BMgn007933	4.3795
gRNA_84416	BMgn015924	4.3773
gRNA_85875	BMgn016176	4.3692
gRNA_12357	BMgn002675	4.369
gRNA_73908	BMgn014068	4.369
gRNA_53688	BMgn010423	4.3678
gRNA_76631	BMgn014590	4.3675
gRNA_82457	BMgn015589	4.3663
gRNA_30493	BMgn006233	4.3653
gRNA_65078	BMgn012468	4.3623
gRNA_65769	BMgn012595	4.3565
gRNA_9534	BMgn002063	4.3562
gRNA_60818	BMgn011700	4.3539
gRNA_58390	BMgn011263	4.3519
gRNA_20293	BMgn004381	4.3454
gRNA_64707	BMgn012394	4.3375
gRNA_18009	BMgn003890	4.3315
gRNA_6093	BMgn001322	4.3304
gRNA_67093	BMgn012841	4.3259
gRNA_6384	BMgn001384	4.3259
gRNA_38650	BMgn007702	4.3254
gRNA_6816	BMgn001479	4.3243
gRNA_12974	BMgn002806	4.324
gRNA_38614	BMgn007695	4.3232
gRNA_5885	BMgn001276	4.3206
gRNA_33165	BMgn006723	4.3195
gRNA_9394	BMgn002031	4.3183
gRNA_84899	BMgn016009	4.3181
gRNA_80846	BMgn015312	4.3174
gRNA_76425	BMgn014546	4.3108
gRNA_68023	BMgn013005	4.3088
gRNA_42327	BMgn008364	4.3088
gRNA_83068	BMgn015693	4.3088
gRNA_71587	BMgn013642	4.308
gRNA_91300	BMgn017119	4.3047
gRNA_51891	BMgn010103	4.3002
gRNA_75498	BMgn014377	4.2976
gRNA_77196	BMgn014691	4.2955
gRNA_26251	BMgn005463	4.2953
gRNA_51667	BMgn010061	4.2943
gRNA_25435	BMgn005313	4.2927
gRNA_8278	BMgn001790	4.2907
gRNA_45201	BMgn008878	4.2897
gRNA_77836	BMgn014800	4.2885
gRNA_64868	BMgn012423	4.2835
gRNA_10672	BMgn002316	4.2801
gRNA_13666	BMgn002951	4.2788
gRNA_11105	BMgn002411	4.2783
gRNA_28366	BMgn005850	4.2674
gRNA_90201	BMgn016928	4.2627
gRNA_77687	BMgn014775	4.2626
gRNA_80577	BMgn015266	4.2621
gRNA_47970	BMgn009384	4.262
gRNA_3848	BMgn000836	4.2555
gRNA_89889	BMgn016874	4.2487
gRNA_39321	BMgn007821	4.2454
gRNA_26359	BMgn005481	4.2415
gRNA_8437	BMgn001826	4.2348
gRNA_85425	BMgn016100	4.2347
gRNA_21466	BMgn004596	4.2339
gRNA_10727	BMgn002331	4.2329
gRNA_85685	BMgn016144	4.2322
gRNA_1763	BMgn000378	4.2309
gRNA_18921	BMgn004090	4.2309
gRNA_60502	BMgn011647	4.2237
gRNA_64893	BMgn012427	4.221
gRNA_67848	BMgn012972	4.2203
gRNA_51734	BMgn010075	4.22
gRNA_7799	BMgn001688	4.2195
gRNA_30282	BMgn006196	4.2164
gRNA_8442	BMgn001827	4.2139
gRNA_47897	BMgn009370	4.2122
gRNA_61077	BMgn011748	4.2122
gRNA_33489	BMgn006782	4.2089
gRNA_40770	BMgn008079	4.2071
gRNA_49562	BMgn009666	4.2064
gRNA_11525	BMgn002502	4.2024
gRNA_93413	BMgn017484	4.2023
gRNA_82479	BMgn015592	4.2023
gRNA_40293	BMgn007996	4.2023
gRNA_63797	BMgn012229	4.2023
gRNA_86770	BMgn016332	4.2023
gRNA_57265	BMgn011053	4.2023
gRNA_44803	BMgn008809	4.2007
gRNA_40020	BMgn007945	4.1937
gRNA_7205	BMgn001558	4.1899
gRNA_39549	BMgn007864	4.1887
gRNA_48942	BMgn009557	4.1864
gRNA_57978	BMgn011188	4.1852
gRNA_66148	BMgn012660	4.1847
gRNA_3519	BMgn000763	4.1825
gRNA_70570	BMgn013460	4.1787
gRNA_63319	BMgn012146	4.1771
gRNA_11896	BMgn002579	4.1768
gRNA_29090	BMgn005980	4.1715
gRNA_45255	BMgn008888	4.1697
gRNA_31511	BMgn006422	4.1687
gRNA_43446	BMgn008565	4.1684
gRNA_20099	BMgn004347	4.1663
gRNA_54613	BMgn010585	4.1658
gRNA_75197	BMgn014314	4.1657
gRNA_17013	BMgn003670	4.1575
gRNA_25507	BMgn005326	4.1549
gRNA_88620	BMgn016653	4.1533
gRNA_45321	BMgn008899	4.153
gRNA_55697	BMgn010773	4.1515
gRNA_52960	BMgn010293	4.151
gRNA_77653	BMgn014770	4.1457
gRNA_38385	BMgn007654	4.1397
gRNA_55486	BMgn010737	4.1371
gRNA_62519	BMgn012005	4.1358
gRNA_33232	BMgn006736	4.134
gRNA_63018	BMgn012091	4.1328
gRNA_18305	BMgn003954	4.1319
gRNA_65821	BMgn012604	4.1319
gRNA_46149	BMgn009047	4.1317
gRNA_35413	BMgn007122	4.1251
gRNA_21029	BMgn004513	4.1186
gRNA_31245	BMgn006369	4.1171
gRNA_82940	BMgn015671	4.1162
gRNA_64253	BMgn012310	4.1111
gRNA_42822	BMgn008450	4.1056
gRNA_80919	BMgn015324	4.0958
gRNA_47969	BMgn009384	4.0958
gRNA_64124	BMgn012287	4.0958
gRNA_61444	BMgn011813	4.0958
gRNA_73012	BMgn013902	4.0958
gRNA_76807	BMgn014624	4.0953
gRNA_31524	BMgn006424	4.0944
gRNA_33769	BMgn006831	4.087
gRNA_93081	BMgn017427	4.0866
gRNA_2412	BMgn000521	4.0832
gRNA_59561	BMgn011473	4.0822
gRNA_37752	BMgn007543	4.0802
gRNA_90586	BMgn016997	4.0796
gRNA_48051	BMgn009398	4.0795
gRNA_17598	BMgn003793	4.0758
gRNA_71134	BMgn013557	4.0751
gRNA_84536	BMgn015946	4.0751
gRNA_56360	BMgn010893	4.0751
gRNA_54503	BMgn010566	4.0731
gRNA_40916	BMgn008107	4.0712
gRNA_50730	BMgn009880	4.0682
gRNA_29727	BMgn006091	4.0661
gRNA_4443	BMgn000965	4.0644
gRNA_36978	BMgn007413	4.0627
gRNA_81058	BMgn015348	4.0523
gRNA_52202	BMgn010157	4.0506
gRNA_38132	BMgn007611	4.0486
gRNA_25630	BMgn005348	4.0427
gRNA_29503	BMgn006053	4.038
gRNA_13871	BMgn002997	4.0366
gRNA_78486	BMgn014910	4.0362
gRNA_64758	BMgn012404	4.0341
gRNA_66696	BMgn012765	4.0334
gRNA_81763	BMgn015469	4.0289
gRNA_13716	BMgn002962	4.0284
gRNA_68874	BMgn013160	4.0265
gRNA_53546	BMgn010398	4.0249
gRNA_57968	BMgn011186	4.0249
gRNA_2466	BMgn000532	4.0248
gRNA_89258	BMgn016765	4.0183
gRNA_70664	BMgn013476	4.0112
gRNA_50063	BMgn009755	4.0095
gRNA_82947	BMgn015672	4.0056
gRNA_57410	BMgn011077	4.0049
gRNA_61962	BMgn011905	4.0049
gRNA_40474	BMgn008026	4.0045
gRNA_33788	BMgn006834	4.0045
gRNA_26654	BMgn005535	4.004
gRNA_28202	BMgn005818	4.0038
gRNA_52781	BMgn010259	4.002
gRNA_8153	BMgn001763	4.0012
gRNA_13874	BMgn002998	3.9996
gRNA_10	BMgn000002	3.9979
gRNA_20639	BMgn004444	3.9951
gRNA_61228	BMgn011774	3.9945
gRNA_90166	BMgn016922	3.9931
gRNA_12723	BMgn002752	3.9913
gRNA_40030	BMgn007947	3.9899
gRNA_91531	BMgn017161	3.9892
gRNA_61481	BMgn011819	3.9892
gRNA_86873	BMgn016350	3.9892
gRNA_46144	BMgn009046	3.9892
gRNA_42916	BMgn008468	3.9892
gRNA_43214	BMgn008523	3.9892
gRNA_22329	BMgn004753	3.9892
gRNA_83295	BMgn015732	3.9885
gRNA_2974	BMgn000648	3.9838
gRNA_19600	BMgn004241	3.982
gRNA_71361	BMgn013600	3.9779
gRNA_70961	BMgn013527	3.9722
gRNA_24982	BMgn005236	3.9722
gRNA_29276	BMgn006013	3.9699
gRNA_26250	BMgn005463	3.9677
gRNA_619	BMgn000139	3.967
gRNA_71367	BMgn013601	3.9645
gRNA_48154	BMgn009417	3.9561
gRNA_65663	BMgn012576	3.956
gRNA_41852	BMgn008280	3.9548
gRNA_78054	BMgn014838	3.9529
gRNA_25074	BMgn005251	3.9516
gRNA_26626	BMgn005529	3.9468
gRNA_78805	BMgn014964	3.9388
gRNA_25452	BMgn005316	3.9379
gRNA_74817	BMgn014240	3.9332
gRNA_91417	BMgn017140	3.9316
gRNA_74750	BMgn014228	3.9283
gRNA_527	BMgn000117	3.9263
gRNA_27867	BMgn005755	3.9257
gRNA_42099	BMgn008326	3.9241
gRNA_83363	BMgn015743	3.924
gRNA_75078	BMgn014287	3.9222
gRNA_71408	BMgn013608	3.9216
gRNA_54545	BMgn010573	3.9215
gRNA_64440	BMgn012347	3.9203
gRNA_53894	BMgn010462	3.9179
gRNA_62604	BMgn012019	3.9132
gRNA_83746	BMgn015809	3.9119
gRNA_3341	BMgn000724	3.9098
gRNA_711	BMgn000161	3.9093
gRNA_27456	BMgn005682	3.9086
gRNA_4731	BMgn001026	3.9066
gRNA_73595	BMgn014012	3.9062
gRNA_31398	BMgn006400	3.9016
gRNA_68680	BMgn013127	3.9013
gRNA_16465	BMgn003552	3.8962
gRNA_74308	BMgn014140	3.8962
gRNA_48767	BMgn009526	3.8922
gRNA_62305	BMgn011967	3.8911
gRNA_53718	BMgn010428	3.888
gRNA_45529	BMgn008933	3.8877
gRNA_47888	BMgn009369	3.8827
gRNA_46945	BMgn009191	3.8813
gRNA_55767	BMgn010785	3.8795
gRNA_63918	BMgn012251	3.8788
gRNA_17299	BMgn003730	3.876
gRNA_11915	BMgn002584	3.876
gRNA_7051	BMgn001527	3.8755
gRNA_82911	BMgn015666	3.8742
gRNA_29481	BMgn006050	3.8738
gRNA_15590	BMgn003368	3.8727
gRNA_35349	BMgn007110	3.8703
gRNA_31710	BMgn006463	3.8702
gRNA_22590	BMgn004798	3.8688
gRNA_91181	BMgn017099	3.8679
gRNA_91667	BMgn017184	3.8665
gRNA_35041	BMgn007059	3.8589
gRNA_41388	BMgn008191	3.8574
gRNA_61311	BMgn011789	3.8553
gRNA_2948	BMgn000643	3.8551
gRNA_73654	BMgn014025	3.8544
gRNA_32860	BMgn006668	3.853
gRNA_46692	BMgn009144	3.8502
gRNA_26981	BMgn005590	3.85
gRNA_47492	BMgn009298	3.8497
gRNA_90213	BMgn016930	3.8493
gRNA_56060	BMgn010837	3.8488
gRNA_888	BMgn000196	3.8486
gRNA_10997	BMgn002387	3.8482
gRNA_28	BMgn000006	3.8473
gRNA_16215	BMgn003499	3.8452
gRNA_23459	BMgn004950	3.8449
gRNA_78313	BMgn014881	3.8398
gRNA_42694	BMgn008428	3.839
gRNA_10063	BMgn002179	3.837
gRNA_2254	BMgn000484	3.8316
gRNA_10803	BMgn002347	3.8314
gRNA_79129	BMgn015021	3.8272
gRNA_82925	BMgn015669	3.827
gRNA_27385	BMgn005667	3.8269
gRNA_66985	BMgn012820	3.8269
gRNA_35122	BMgn007073	3.8263
gRNA_89246	BMgn016763	3.8238
gRNA_56476	BMgn010914	3.8197
gRNA_52864	BMgn010275	3.8196
gRNA_71881	BMgn013696	3.8196
gRNA_60653	BMgn011672	3.8196
gRNA_23805	BMgn005012	3.8182
gRNA_55506	BMgn010740	3.8179
gRNA_23734	BMgn004996	3.8171
gRNA_26451	BMgn005497	3.8139
gRNA_52372	BMgn010185	3.8139
gRNA_73008	BMgn013901	3.8113
gRNA_4957	BMgn001073	3.8098
gRNA_83385	BMgn015748	3.8074
gRNA_59412	BMgn011449	3.8071
gRNA_64735	BMgn012400	3.8065
gRNA_55590	BMgn010754	3.8059
gRNA_32973	BMgn006688	3.8059
gRNA_23095	BMgn004887	3.8048
gRNA_54860	BMgn010629	3.8027
gRNA_22645	BMgn004807	3.7975
gRNA_27290	BMgn005650	3.7942
gRNA_49913	BMgn009730	3.7939
gRNA_52245	BMgn010164	3.7903
gRNA_10251	BMgn002221	3.7903
gRNA_40885	BMgn008101	3.7899
gRNA_56991	BMgn011002	3.787
gRNA_6545	BMgn001418	3.7823
gRNA_33765	BMgn006830	3.7819
gRNA_63523	BMgn012181	3.7819
gRNA_58197	BMgn011229	3.7801
gRNA_26725	BMgn005548	3.779
gRNA_29551	BMgn006061	3.7787
gRNA_14631	BMgn003162	3.7777
gRNA_10874	BMgn002362	3.7769
gRNA_20981	BMgn004505	3.7766
gRNA_73441	BMgn013981	3.7762
gRNA_60023	BMgn011558	3.7762
gRNA_59463	BMgn011457	3.7762
gRNA_10780	BMgn002342	3.7762
gRNA_63503	BMgn012177	3.7762
gRNA_11179	BMgn002426	3.7762
gRNA_40449	BMgn008022	3.7762
gRNA_80659	BMgn015281	3.7762
gRNA_46137	BMgn009045	3.7762
gRNA_60986	BMgn011732	3.7762
gRNA_29804	BMgn006104	3.7762
gRNA_85037	BMgn016032	3.7762
gRNA_42017	BMgn008310	3.7755
gRNA_11550	BMgn002507	3.773
gRNA_65880	BMgn012614	3.7715
gRNA_1043	BMgn000229	3.7568
gRNA_85777	BMgn016160	3.7562
gRNA_42740	BMgn008436	3.7555
gRNA_3244	BMgn000703	3.7537
gRNA_8136	BMgn001760	3.7535
gRNA_68040	BMgn013007	3.7517
gRNA_61490	BMgn011820	3.749
gRNA_23751	BMgn004999	3.7443
gRNA_20184	BMgn004361	3.7443
gRNA_9471	BMgn002047	3.7436
gRNA_69446	BMgn013262	3.7414
gRNA_25743	BMgn005369	3.7395
gRNA_35807	BMgn007197	3.738
gRNA_34946	BMgn007041	3.7366
gRNA_16342	BMgn003526	3.7354
gRNA_92320	BMgn017297	3.7345
gRNA_46113	BMgn009041	3.7334
gRNA_87080	BMgn016386	3.7289
gRNA_47097	BMgn009222	3.7266
gRNA_1578	BMgn000341	3.7242
gRNA_47323	BMgn009267	3.7241
gRNA_46175	BMgn009051	3.7239
gRNA_59438	BMgn011453	3.7205
gRNA_50345	BMgn009806	3.719
gRNA_42297	BMgn008359	3.7184
gRNA_35191	BMgn007084	3.7184
gRNA_20414	BMgn004401	3.718
gRNA_44058	BMgn008673	3.7172
gRNA_1879	BMgn000406	3.7158
gRNA_85304	BMgn016080	3.7152
gRNA_87923	BMgn016532	3.7152
gRNA_68081	BMgn013014	3.7145
gRNA_42876	BMgn008461	3.7138
gRNA_91465	BMgn017149	3.7134
gRNA_14871	BMgn003216	3.7133
gRNA_33852	BMgn006846	3.7129
gRNA_78171	BMgn014857	3.7119
gRNA_47021	BMgn009208	3.7115
gRNA_19337	BMgn004185	3.7109
gRNA_4386	BMgn000951	3.7109
gRNA_77155	BMgn014684	3.7078
gRNA_36998	BMgn007417	3.7077
gRNA_55712	BMgn010776	3.7045
gRNA_42779	BMgn008443	3.7039
gRNA_59299	BMgn011429	3.7038
gRNA_79469	BMgn015078	3.7019
gRNA_91997	BMgn017242	3.7011
gRNA_74033	BMgn014090	3.7005
gRNA_28995	BMgn005964	3.6986
gRNA_14884	BMgn003218	3.6971
gRNA_51059	BMgn009947	3.6964
gRNA_70871	BMgn013511	3.6938
gRNA_2291	BMgn000493	3.6938
gRNA_50239	BMgn009786	3.6896
gRNA_26722	BMgn005547	3.6895
gRNA_12964	BMgn002803	3.6893
gRNA_15253	BMgn003297	3.6878
gRNA_35713	BMgn007180	3.6847
gRNA_61043	BMgn011743	3.6838
gRNA_54002	BMgn010481	3.6789
gRNA_33410	BMgn006766	3.6772
gRNA_69646	BMgn013295	3.6769
gRNA_69803	BMgn013324	3.6766
gRNA_81836	BMgn015482	3.6752
gRNA_39588	BMgn007871	3.6726
gRNA_6382	BMgn001384	3.6724
gRNA_85615	BMgn016133	3.6719
gRNA_9423	BMgn002037	3.6697
gRNA_10165	BMgn002202	3.6697
gRNA_19735	BMgn004273	3.6697
gRNA_53163	BMgn010330	3.6697
gRNA_58172	BMgn011225	3.6693
gRNA_49778	BMgn009706	3.669
gRNA_20012	BMgn004329	3.6683
gRNA_51004	BMgn009935	3.6677
gRNA_76478	BMgn014555	3.6655
gRNA_67512	BMgn012914	3.6636
gRNA_43841	BMgn008636	3.6622
gRNA_64028	BMgn012270	3.6608
gRNA_24717	BMgn005185	3.6587
gRNA_38257	BMgn007632	3.6585
gRNA_2963	BMgn000646	3.6558
gRNA_72360	BMgn013785	3.6548
gRNA_72783	BMgn013861	3.6527
gRNA_22707	BMgn004817	3.6525
gRNA_520	BMgn000116	3.6474
gRNA_80783	BMgn015302	3.6474
gRNA_58806	BMgn011338	3.6454
gRNA_13288	BMgn002870	3.6448
gRNA_47995	BMgn009389	3.6445
gRNA_32165	BMgn006542	3.6437
gRNA_39011	BMgn007768	3.6429
gRNA_5870	BMgn001273	3.6429
gRNA_32432	BMgn006590	3.6399
gRNA_3886	BMgn000844	3.6392
gRNA_13021	BMgn002816	3.638
gRNA_87123	BMgn016395	3.6353
gRNA_22398	BMgn004765	3.6322
gRNA_54295	BMgn010531	3.6317
gRNA_5288	BMgn001148	3.6285
gRNA_19606	BMgn004242	3.628
gRNA_35321	BMgn007106	3.6252
gRNA_90628	BMgn017004	3.6243
gRNA_12422	BMgn002689	3.624
gRNA_40864	BMgn008096	3.6184
gRNA_74342	BMgn014146	3.618
gRNA_50190	BMgn009777	3.6171
gRNA_87073	BMgn016385	3.6157
gRNA_25454	BMgn005317	3.6156
gRNA_88909	BMgn016704	3.615
gRNA_86437	BMgn016275	3.612
gRNA_2581	BMgn000558	3.6116
gRNA_46551	BMgn009120	3.6109
gRNA_8933	BMgn001929	3.6096
gRNA_91601	BMgn017173	3.609
gRNA_41176	BMgn008152	3.6061
gRNA_66617	BMgn012752	3.6047
gRNA_53338	BMgn010363	3.6024
gRNA_28709	BMgn005913	3.6018
gRNA_16688	BMgn003600	3.6015
gRNA_73816	BMgn014052	3.601
gRNA_22387	BMgn004763	3.5978
gRNA_44841	BMgn008816	3.5974
gRNA_43429	BMgn008562	3.595
gRNA_21919	BMgn004679	3.5939
gRNA_64880	BMgn012425	3.5933
gRNA_6383	BMgn001384	3.5933
gRNA_86767	BMgn016332	3.5933
gRNA_20656	BMgn004447	3.5933
gRNA_85963	BMgn016191	3.592
gRNA_92809	BMgn017381	3.5914
gRNA_65102	BMgn012472	3.591
gRNA_65515	BMgn012545	3.5895
gRNA_56162	BMgn010855	3.5889
gRNA_74802	BMgn014237	3.5847
gRNA_90544	BMgn016990	3.5819
gRNA_44132	BMgn008685	3.5816
gRNA_6676	BMgn001448	3.5809
gRNA_50726	BMgn009880	3.5769
gRNA_204	BMgn000048	3.5752
gRNA_14169	BMgn003061	3.5721
gRNA_7181	BMgn001553	3.5709
gRNA_1225	BMgn000270	3.5709
gRNA_69933	BMgn013346	3.5706
gRNA_29512	BMgn006055	3.5704
gRNA_12271	BMgn002657	3.5702
gRNA_15320	BMgn003311	3.5642
gRNA_47908	BMgn009372	3.5632
gRNA_37664	BMgn007529	3.5632
gRNA_27943	BMgn005769	3.5632
gRNA_41492	BMgn008211	3.5632
gRNA_53392	BMgn010372	3.5632
gRNA_75016	BMgn014276	3.5632
gRNA_10890	BMgn002366	3.5632
gRNA_10009	BMgn002168	3.5632
gRNA_77822	BMgn014798	3.5632
gRNA_46100	BMgn009038	3.5632
gRNA_19229	BMgn004160	3.563
gRNA_93894	BMgn017575	3.5616
gRNA_21098	BMgn004526	3.5607
gRNA_41429	BMgn008201	3.5586
gRNA_44796	BMgn008808	3.5561
gRNA_82135	BMgn015533	3.556
gRNA_82177	BMgn015540	3.5541
gRNA_79400	BMgn015066	3.5537
gRNA_90023	BMgn016897	3.5529
gRNA_83089	BMgn015696	3.5503
gRNA_77310	BMgn014711	3.5501
gRNA_65660	BMgn012576	3.5449
gRNA_69832	BMgn013328	3.5424
gRNA_34598	BMgn006979	3.5417
gRNA_35583	BMgn007154	3.5401
gRNA_28554	BMgn005884	3.5388
gRNA_32602	BMgn006623	3.5386
gRNA_51335	BMgn010000	3.5381
gRNA_65414	BMgn012526	3.5371
gRNA_32203	BMgn006550	3.5352
gRNA_69086	BMgn013199	3.5345
gRNA_13323	BMgn002878	3.5336
gRNA_19156	BMgn004141	3.5317
gRNA_61035	BMgn011741	3.5298
gRNA_13603	BMgn002938	3.5275
gRNA_91398	BMgn017137	3.5225
gRNA_51006	BMgn009935	3.5208
gRNA_54912	BMgn010638	3.5207
gRNA_72631	BMgn013834	3.5191
gRNA_76494	BMgn014558	3.5175
gRNA_52483	BMgn010204	3.5142
gRNA_52905	BMgn010283	3.5136
gRNA_68887	BMgn013163	3.5134
gRNA_82130	BMgn015532	3.513
gRNA_24814	BMgn005204	3.5125
gRNA_42363	BMgn008370	3.5122
gRNA_20395	BMgn004398	3.5121
gRNA_87144	BMgn016398	3.5118
gRNA_17517	BMgn003775	3.5101
gRNA_72778	BMgn013861	3.5075
gRNA_41415	BMgn008196	3.5011
gRNA_7777	BMgn001684	3.5004
gRNA_92136	BMgn017266	3.4991
gRNA_47570	BMgn009312	3.4978
gRNA_40240	BMgn007986	3.4961
gRNA_89169	BMgn016750	3.496
gRNA_1281	BMgn000281	3.4945
gRNA_19827	BMgn004292	3.4931
gRNA_10033	BMgn002173	3.4918
gRNA_41149	BMgn008148	3.4898
gRNA_69994	BMgn013357	3.489
gRNA_63429	BMgn012165	3.4874
gRNA_31284	BMgn006376	3.4871
gRNA_72325	BMgn013779	3.4861
gRNA_64481	BMgn012356	3.484
gRNA_17393	BMgn003750	3.4838
gRNA_48575	BMgn009493	3.4825
gRNA_4788	BMgn001038	3.4824
gRNA_38464	BMgn007670	3.4809
gRNA_87142	BMgn016398	3.4808
gRNA_62011	BMgn011913	3.4808
gRNA_66960	BMgn012814	3.4806
gRNA_28260	BMgn005828	3.4805
gRNA_40153	BMgn007969	3.479
gRNA_6537	BMgn001416	3.4789
gRNA_15498	BMgn003349	3.4789
gRNA_75805	BMgn014433	3.4776
gRNA_25740	BMgn005368	3.4733
gRNA_26508	BMgn005507	3.4714
gRNA_80979	BMgn015335	3.4689
gRNA_83970	BMgn015847	3.4672
gRNA_5651	BMgn001228	3.4667
gRNA_21306	BMgn004565	3.4661
gRNA_2776	BMgn000602	3.4651
gRNA_10580	BMgn002295	3.465
gRNA_92944	BMgn017404	3.4645
gRNA_9439	BMgn002040	3.4626
gRNA_92077	BMgn017256	3.4566
gRNA_82739	BMgn015637	3.4566
gRNA_25448	BMgn005316	3.4566
gRNA_11740	BMgn002547	3.4566
gRNA_69092	BMgn013200	3.4566
gRNA_55361	BMgn010715	3.4566
gRNA_62333	BMgn011972	3.4552
gRNA_20908	BMgn004491	3.4539
gRNA_68728	BMgn013135	3.4517
gRNA_70612	BMgn013467	3.4502
gRNA_55965	BMgn010820	3.446
gRNA_67020	BMgn012828	3.4429
gRNA_69818	BMgn013326	3.4428
gRNA_20378	BMgn004395	3.442
gRNA_40051	BMgn007951	3.4415
gRNA_87401	BMgn016443	3.4411
gRNA_46731	BMgn009150	3.4361
gRNA_42525	BMgn008397	3.4358
gRNA_44762	BMgn008803	3.4346
gRNA_61392	BMgn011803	3.4342
gRNA_84509	BMgn015941	3.4323
gRNA_24989	BMgn005237	3.4323
gRNA_625	BMgn000140	3.4313
gRNA_76524	BMgn014563	3.4306
gRNA_51389	BMgn010009	3.4301
gRNA_46154	BMgn009048	3.4296
gRNA_65858	BMgn012611	3.4261
gRNA_16257	BMgn003508	3.4259
gRNA_32407	BMgn006585	3.4259
gRNA_11464	BMgn002489	3.4259
gRNA_89077	BMgn016734	3.4236
gRNA_55097	BMgn010669	3.4232
gRNA_35848	BMgn007205	3.423
gRNA_84934	BMgn016015	3.4228
gRNA_50057	BMgn009754	3.4221
gRNA_42660	BMgn008422	3.422
gRNA_6746	BMgn001465	3.4207
gRNA_83348	BMgn015741	3.4203
gRNA_56592	BMgn010934	3.42
gRNA_52862	BMgn010274	3.4181
gRNA_89487	BMgn016806	3.4138
gRNA_4514	BMgn000979	3.413
gRNA_56181	BMgn010858	3.4125
gRNA_30835	BMgn006297	3.4123
gRNA_86076	BMgn016211	3.4036
gRNA_69314	BMgn013239	3.4034
gRNA_34959	BMgn007043	3.403
gRNA_19060	BMgn004121	3.4021
gRNA_88938	BMgn016710	3.4013
gRNA_39632	BMgn007879	3.3989
gRNA_2502	BMgn000541	3.3989
gRNA_62123	BMgn011934	3.3953
gRNA_72690	BMgn013846	3.3939
gRNA_51315	BMgn009995	3.3937
gRNA_65830	BMgn012606	3.3922
gRNA_41339	BMgn008181	3.3913
gRNA_73071	BMgn013911	3.3889
gRNA_81998	BMgn015510	3.3887
gRNA_47636	BMgn009324	3.3877
gRNA_27000	BMgn005594	3.3856
gRNA_77760	BMgn014788	3.383
gRNA_79118	BMgn015019	3.3819
gRNA_31752	BMgn006470	3.3814
gRNA_27698	BMgn005726	3.3801
gRNA_30788	BMgn006288	3.3775
gRNA_63549	BMgn012186	3.3775
gRNA_2206	BMgn000474	3.3772
gRNA_2113	BMgn000456	3.3771
gRNA_7385	BMgn001599	3.3727
gRNA_31504	BMgn006421	3.3725
gRNA_59149	BMgn011400	3.3724
gRNA_15365	BMgn003320	3.3706
gRNA_2253	BMgn000484	3.3672
gRNA_47025	BMgn009208	3.3653
gRNA_60776	BMgn011693	3.3653
gRNA_12083	BMgn002620	3.3651
gRNA_59048	BMgn011380	3.3639
gRNA_66252	BMgn012683	3.3616
gRNA_40195	BMgn007977	3.3616
gRNA_14309	BMgn003091	3.3586
gRNA_38913	BMgn007749	3.3574
gRNA_61099	BMgn011752	3.3573
gRNA_42158	BMgn008336	3.3569
gRNA_25209	BMgn005274	3.3557
gRNA_61843	BMgn011884	3.3553
gRNA_12980	BMgn002808	3.3523
gRNA_49103	BMgn009585	3.3501
gRNA_85225	BMgn016065	3.3501
gRNA_30128	BMgn006166	3.3501
gRNA_10408	BMgn002255	3.3501
gRNA_25085	BMgn005253	3.3501
gRNA_75779	BMgn014429	3.3501
gRNA_72921	BMgn013886	3.3501
gRNA_80229	BMgn015207	3.3501
gRNA_88207	BMgn016581	3.3501
gRNA_29840	BMgn006111	3.3501
gRNA_37647	BMgn007526	3.3501
gRNA_83877	BMgn015831	3.3501
gRNA_38134	BMgn007611	3.3488
gRNA_868	BMgn000192	3.3472
gRNA_88211	BMgn016582	3.3472
gRNA_48300	BMgn009445	3.3459
gRNA_22426	BMgn004769	3.3448
gRNA_57354	BMgn011068	3.3448
gRNA_37520	BMgn007505	3.3404
gRNA_79009	BMgn015001	3.3371
gRNA_15344	BMgn003316	3.3339
gRNA_34221	BMgn006913	3.3336
gRNA_57061	BMgn011015	3.3331
gRNA_62113	BMgn011933	3.3313
gRNA_58784	BMgn011333	3.3296
gRNA_20332	BMgn004388	3.3287
gRNA_46050	BMgn009027	3.3282
gRNA_21525	BMgn004608	3.3261
gRNA_47857	BMgn009363	3.324
gRNA_10730	BMgn002332	3.324
gRNA_19495	BMgn004219	3.322
gRNA_25342	BMgn005297	3.3218
gRNA_31159	BMgn006354	3.3183
gRNA_14548	BMgn003145	3.3182
gRNA_47517	BMgn009302	3.3168
gRNA_52255	BMgn010166	3.3127
gRNA_32044	BMgn006521	3.3097
gRNA_19206	BMgn004154	3.3043
gRNA_3220	BMgn000699	3.3019
gRNA_67550	BMgn012920	3.3017
gRNA_43216	BMgn008524	3.3006
gRNA_64958	BMgn012444	3.2993
gRNA_82170	BMgn015538	3.2971
gRNA_45419	BMgn008915	3.297
gRNA_51544	BMgn010039	3.2957
gRNA_68711	BMgn013132	3.2945
gRNA_13321	BMgn002878	3.2916
gRNA_79937	BMgn015158	3.2907
gRNA_53145	BMgn010326	3.2901
gRNA_62275	BMgn011962	3.2881
gRNA_79068	BMgn015010	3.2845
gRNA_76947	BMgn014649	3.2835
gRNA_48638	BMgn009503	3.2771
gRNA_57315	BMgn011062	3.277
gRNA_65006	BMgn012453	3.2763
gRNA_53786	BMgn010441	3.2759
gRNA_65790	BMgn012599	3.2754
gRNA_20338	BMgn004389	3.2742
gRNA_36835	BMgn007385	3.2735
gRNA_27394	BMgn005669	3.2725
gRNA_87769	BMgn016505	3.2725
gRNA_88445	BMgn016622	3.2725
gRNA_42480	BMgn008390	3.2717
gRNA_6802	BMgn001476	3.2704
gRNA_84845	BMgn016000	3.2702
gRNA_44916	BMgn008829	3.2677
gRNA_23874	BMgn005023	3.266
gRNA_10537	BMgn002287	3.2659
gRNA_69141	BMgn013209	3.2655
gRNA_58972	BMgn011367	3.2644
gRNA_72957	BMgn013892	3.2634
gRNA_14578	BMgn003151	3.263
gRNA_6579	BMgn001426	3.2625
gRNA_36499	BMgn007319	3.2622
gRNA_82685	BMgn015628	3.2565
gRNA_15551	BMgn003359	3.2564
gRNA_66494	BMgn012728	3.2559
gRNA_63193	BMgn012124	3.2548
gRNA_416	BMgn000091	3.2548
gRNA_1476	BMgn000321	3.2513
gRNA_28764	BMgn005922	3.251
gRNA_57568	BMgn011107	3.2505
gRNA_20964	BMgn004502	3.2504
gRNA_71197	BMgn013570	3.2503
gRNA_9725	BMgn002103	3.2498
gRNA_35780	BMgn007193	3.2474
gRNA_22540	BMgn004790	3.2471
gRNA_16370	BMgn003531	3.2436
gRNA_56236	BMgn010869	3.2436
gRNA_79377	BMgn015063	3.2436
gRNA_20722	BMgn004458	3.2436
gRNA_57743	BMgn011141	3.2435
gRNA_77258	BMgn014702	3.2412
gRNA_36201	BMgn007269	3.2392
gRNA_55905	BMgn010810	3.2391
gRNA_1771	BMgn000380	3.2388
gRNA_86215	BMgn016236	3.237
gRNA_28499	BMgn005875	3.2337
gRNA_59304	BMgn011430	3.2333
gRNA_36321	BMgn007289	3.2333
gRNA_49302	BMgn009619	3.2328
gRNA_44283	BMgn008712	3.2324
gRNA_28771	BMgn005923	3.2323
gRNA_92315	BMgn017296	3.2317
gRNA_5781	BMgn001256	3.2316
gRNA_5410	BMgn001174	3.2281
gRNA_27258	BMgn005644	3.2257
gRNA_54042	BMgn010488	3.2238
gRNA_54756	BMgn010612	3.2236
gRNA_11669	BMgn002531	3.2234
gRNA_12168	BMgn002637	3.2204
gRNA_1689	BMgn000364	3.2202
gRNA_72912	BMgn013885	3.2188
gRNA_22678	BMgn004813	3.2184
gRNA_70930	BMgn013521	3.2184
gRNA_56617	BMgn010938	3.2182
gRNA_49782	BMgn009707	3.2174
gRNA_73951	BMgn014076	3.217
gRNA_67439	BMgn012899	3.2144
gRNA_61104	BMgn011753	3.2139
gRNA_86009	BMgn016199	3.212
gRNA_92428	BMgn017315	3.211
gRNA_10228	BMgn002216	3.21
gRNA_21900	BMgn004676	3.2089
gRNA_12798	BMgn002768	3.2083
gRNA_9398	BMgn002032	3.2081
gRNA_27261	BMgn005644	3.2069
gRNA_23806	BMgn005012	3.2064
gRNA_2267	BMgn000489	3.2038
gRNA_90980	BMgn017065	3.2037
gRNA_34725	BMgn007000	3.2008
gRNA_37175	BMgn007446	3.1973
gRNA_62153	BMgn011940	3.1946
gRNA_80395	BMgn015236	3.1929
gRNA_86382	BMgn016265	3.1927
gRNA_86916	BMgn016357	3.1927
gRNA_74433	BMgn014168	3.1902
gRNA_10459	BMgn002268	3.1893
gRNA_40041	BMgn007949	3.1893
gRNA_55692	BMgn010772	3.1892
gRNA_11411	BMgn002476	3.1889
gRNA_3714	BMgn000808	3.1879
gRNA_43415	BMgn008560	3.1855
gRNA_3824	BMgn000831	3.1844
gRNA_54899	BMgn010636	3.1817
gRNA_3208	BMgn000696	3.1807
gRNA_21808	BMgn004658	3.177
gRNA_17689	BMgn003812	3.1765
gRNA_13141	BMgn002841	3.1742
gRNA_45598	BMgn008946	3.171
gRNA_44392	BMgn008732	3.1692
gRNA_12092	BMgn002621	3.1686
gRNA_6977	BMgn001512	3.1677
gRNA_54366	BMgn010543	3.1677
gRNA_63749	BMgn012221	3.1665
[truncated: 92,001 more rows]
