# Supplementary material for: Genome-wide CRISPR screening reveals genes essential for cell viability and resistance to abiotic and biotic stresses in Bombyx mori
Source: HighWire-hosted journal article supplement (doi:10.1101/gr.249045.119), 2020-05-01
Supplement: Supplemental_Table_S7.xlsx.xlsx [file Supplemental_Table_S7.xlsx.xlsx]

## Sheet: Supplemental Table legend
Supplemental_Table_S7. CRISPR screens for Bombyx mori cells interaction with BmNPV
Sheet1	Supplemental Table legend
Sheet2	negative screening in NVP
Sheet3	positive screening in NPV
Sheet4	sgRNA score in NPV
Sheet5	anti-BmNPV genes reported
Sheet6	sgRNA score in Phagosome

## Sheet: negative screening in NVP
Gene ID	neg|score	neg|p-value	neg|rank
BMgn013587	4.22e-05	0.00019936	1
BMgn016476	4.28e-05	0.0001363	2
BMgn007486	6.02e-05	0.00028081	3
BMgn003653	0.00012825	0.00039708	4
BMgn005417	0.00016079	0.00049035	5
BMgn008963	0.00016927	0.00034321	6
BMgn017353	0.00020451	0.00061647	7
BMgn015863	0.0002115	0.00064078	8
BMgn012264	0.00021374	0.00064997	9
BMgn007328	0.00022765	0.00084309	10
BMgn010213	0.00029486	0.00056721	11
BMgn004200	0.00029923	0.00088119	12
BMgn003784	0.00038471	0.0011597	13
BMgn016970	0.00039348	0.00075244	14
BMgn006915	0.00042814	0.00081288	15
BMgn013295	0.00047019	0.0013975	16
BMgn016552	0.0004791	0.0014211	17
BMgn004521	0.00051791	0.00098366	18
BMgn004674	0.00054144	0.0010237	19
BMgn012790	0.00064113	0.0018658	20
BMgn016461	0.0006637	0.0019276	21
BMgn010425	0.00071239	0.0013357	22
BMgn005171	0.00072676	0.00072945	23
BMgn008536	0.00084077	0.00084112	24
BMgn001010	0.00084117	0.0030246	25
BMgn012074	0.00088332	0.0016602	26
BMgn006031	0.00088788	0.0016694	27
BMgn014587	0.0008975	0.0025693	28
BMgn015988	0.00090797	0.0025969	29
BMgn010451	0.00091877	0.0026271	30
BMgn005506	0.00093044	0.0033674	31
BMgn000050	0.00093339	0.0026744	32
BMgn002601	0.00096867	0.0034942	33
BMgn010419	0.00099451	0.001879	34
BMgn014353	0.001111	0.0048316	35
BMgn007703	0.0011538	0.0033142	36
BMgn016985	0.001158	0.0033261	37
BMgn000729	0.0011779	0.0033793	38
BMgn016718	0.0011824	0.0022646	39
BMgn003224	0.0012379	0.0023664	40
BMgn010907	0.0012393	0.0035422	41
BMgn006836	0.0012784	0.003646	42
BMgn004913	0.0012968	0.0012786	43
BMgn010119	0.001306	0.0025037	44
BMgn015101	0.0013104	0.0047364	45
BMgn010906	0.0013253	0.0013088	46
BMgn007958	0.0013316	0.0048158	47
BMgn002239	0.0014101	0.0039783	48
BMgn005201	0.0014278	0.0040276	49
BMgn008213	0.0014955	0.004222	50
BMgn013184	0.0015168	0.0029116	51
BMgn015294	0.0015302	0.0043291	52
BMgn007106	0.001566	0.0056323	53
BMgn014677	0.0015669	0.0030173	54
BMgn002842	0.0016103	0.0015867	55
BMgn014535	0.0016664	0.0047239	56
BMgn017053	0.0016673	0.0016504	57
BMgn009739	0.0017518	0.0049498	58
BMgn004075	0.0017947	0.0034929	59
BMgn009272	0.0018372	0.0051896	60
BMgn012357	0.0018406	0.0052034	61
BMgn012480	0.0018428	0.0064633	62
BMgn006527	0.0018496	0.0035927	63
BMgn009450	0.0019121	0.0066518	64
BMgn009024	0.0019152	0.003732	65
BMgn007937	0.0019152	0.003732	66
BMgn004551	0.0019226	0.0054129	67
BMgn013352	0.0019714	0.0055561	68
BMgn001056	0.0019933	0.0038897	69
BMgn016367	0.0020079	0.0056422	70
BMgn014365	0.0020225	0.0039494	71
BMgn000227	0.002079	0.0075274	72
BMgn008744	0.0020856	0.0071037	73
BMgn006920	0.0021074	0.0071595	74
BMgn012359	0.0021518	0.0021391	75
BMgn004607	0.0022322	0.0062518	76
BMgn011528	0.0022759	0.0063628	77
BMgn014196	0.0022994	0.0044795	78
BMgn008112	0.0023072	0.0044913	79
BMgn006635	0.0023669	0.0046096	80
BMgn001520	0.0024083	0.0023966	81
BMgn015033	0.0024368	0.0024321	82
BMgn007135	0.0024495	0.0097404	83
BMgn008218	0.002565	0.0049663	84
BMgn005889	0.002565	0.0049663	85
BMgn007922	0.0025835	0.0072082	86
BMgn011761	0.0026232	0.00731	87
BMgn014374	0.0026599	0.0074147	88
BMgn002358	0.0026933	0.0026784	89
BMgn016667	0.0026979	0.0075169	90
BMgn000859	0.0027057	0.0052415	91
BMgn007872	0.0027167	0.0087275	92
BMgn016588	0.0027605	0.0053269	93
BMgn008204	0.0027762	0.0077376	94
BMgn008644	0.0028177	0.0054372	95
BMgn004708	0.0028196	0.0054405	96
BMgn008154	0.0028358	0.0028275	97
BMgn003357	0.0028867	0.0091939	98
BMgn000371	0.0028928	0.0028781	99
BMgn017165	0.0029026	0.0080982	100
BMgn012521	0.0029042	0.0081008	101
BMgn002605	0.0029334	0.0056415	102
BMgn000338	0.0029903	0.0057414	103
BMgn006918	0.0030163	0.0058031	104
BMgn004395	0.0030176	0.0094941	105
BMgn009041	0.0030353	0.0030226	106
BMgn002380	0.0030472	0.0058504	107
BMgn008445	0.0030574	0.0085258	108
BMgn014945	0.0030697	0.0058885	109
BMgn006327	0.0031154	0.0086881	110
BMgn014001	0.0031408	0.011067	111
BMgn005502	0.0031568	0.0098402	112
BMgn017094	0.0031576	0.0088057	113
BMgn005632	0.0032313	0.0061939	114
BMgn009384	0.0032451	0.010087	115
BMgn007150	0.0032903	0.010196	116
BMgn016598	0.0032918	0.0032551	117
BMgn000731	0.0033161	0.0063431	118
BMgn000287	0.0033203	0.0032834	119
BMgn003720	0.003356	0.009318	120
BMgn000499	0.003356	0.009318	121
BMgn005698	0.0033735	0.0093653	122
BMgn009666	0.0034058	0.0094441	123
BMgn013943	0.0034858	0.0096589	124
BMgn009579	0.0034864	0.012177	125
BMgn014005	0.0035441	0.0098179	126
BMgn013185	0.0035594	0.0068048	127
BMgn012970	0.003587	0.0099315	128
BMgn012996	0.0036294	0.010041	129
BMgn015051	0.003658	0.011102	130
BMgn008997	0.0036647	0.010125	131
BMgn008207	0.0036732	0.0070242	132
BMgn008642	0.0036871	0.010186	133
BMgn006603	0.0037051	0.0036551	134
BMgn005284	0.0037147	0.010259	135
BMgn008756	0.0037465	0.010349	136
BMgn004527	0.0037495	0.007174	137
BMgn013831	0.003782	0.010454	138
BMgn017424	0.0037952	0.010483	139
BMgn015340	0.0038439	0.0073402	140
BMgn005119	0.0038704	0.011624	141
BMgn009137	0.0039008	0.0074354	142
BMgn007738	0.0039577	0.0075425	143
BMgn007684	0.0039616	0.0039048	144
BMgn009475	0.0040145	0.0076607	145
BMgn006576	0.0040196	0.011122	146
BMgn017511	0.0040379	0.01117	147
BMgn013580	0.0040794	0.0077908	148
BMgn003591	0.0041006	0.011335	149
BMgn006632	0.0041086	0.011362	150
BMgn016720	0.0041283	0.0078874	151
BMgn001505	0.0041286	0.0078874	152
BMgn015664	0.0041411	0.011441	153
BMgn008690	0.0041546	0.012319	154
BMgn013481	0.0041893	0.0079898	155
BMgn001405	0.0042281	0.0080673	156
BMgn008592	0.0042312	0.011671	157
BMgn016903	0.0042682	0.0126	158
BMgn012226	0.0042985	0.012678	159
BMgn005406	0.0043043	0.01269	160
BMgn017122	0.0043116	0.011896	161
BMgn005301	0.0043388	0.014955	162
BMgn002323	0.0043738	0.015042	163
BMgn007887	0.0043819	0.012872	164
BMgn012923	0.0044127	0.0084076	165
BMgn009524	0.0044515	0.0084733	166
BMgn006165	0.0044897	0.0085613	167
BMgn004720	0.0045265	0.0086217	168
BMgn011597	0.0045391	0.013274	169
BMgn014018	0.0045404	0.01253	170
BMgn011938	0.0045741	0.0086907	171
BMgn010361	0.0046088	0.0087554	172
BMgn015023	0.0046204	0.013486	173
BMgn011041	0.0046502	0.012835	174
BMgn010740	0.0046526	0.012841	175
BMgn013584	0.004655	0.016009	176
BMgn016925	0.0046971	0.0089114	177
BMgn017030	0.0047453	0.0046871	178
BMgn012334	0.0047539	0.0090251	179
BMgn011237	0.0048778	0.013432	180
BMgn013270	0.0048778	0.013432	181
BMgn007285	0.0048974	0.014235	182
BMgn012484	0.0049449	0.0048848	183
BMgn008900	0.005008	0.0095368	184
BMgn010114	0.0050446	0.0049919	185
BMgn002637	0.0050635	0.014625	186
BMgn002426	0.0050787	0.013988	187
BMgn006936	0.0050829	0.0096931	188
BMgn009317	0.0050873	0.014006	189
BMgn015643	0.00516	0.014206	190
BMgn013078	0.0052251	0.014384	191
BMgn012654	0.0052441	0.005183	192
BMgn017458	0.0052657	0.010012	193
BMgn007761	0.0052777	0.010037	194
BMgn016031	0.0053693	0.01479	195
BMgn004685	0.0054009	0.0053486	196
BMgn003105	0.0054132	0.01027	197
BMgn012284	0.0054195	0.014915	198
BMgn015126	0.0054362	0.010307	199
BMgn013629	0.0054496	0.015001	200
BMgn014396	0.0054689	0.015644	201
BMgn013651	0.0055143	0.010451	202
BMgn010374	0.0055192	0.01888	203
BMgn008033	0.0055779	0.015345	204
BMgn015530	0.0055899	0.015375	205
BMgn002762	0.0056228	0.010661	206
BMgn003249	0.0056751	0.015599	207
BMgn003403	0.0057204	0.010845	208
BMgn003849	0.0057681	0.015846	209
BMgn014101	0.0058341	0.01107	210
BMgn015516	0.0058579	0.016086	211
BMgn007874	0.005864	0.016096	212
BMgn016136	0.0058996	0.011184	213
BMgn010035	0.0058996	0.011184	214
BMgn000937	0.0059831	0.011337	215
BMgn004356	0.0059893	0.016418	216
BMgn003223	0.006042	0.017115	217
BMgn008596	0.0060897	0.016671	218
BMgn016991	0.0060961	0.011523	219
BMgn013516	0.0061009	0.016696	220
BMgn005337	0.0061419	0.0060928	221
BMgn006206	0.006172	0.011664	222
BMgn001646	0.0062123	0.011752	223
BMgn006322	0.0062559	0.0062058	224
BMgn007465	0.0062803	0.017188	225
BMgn011645	0.0062803	0.017188	226
BMgn012702	0.0062887	0.011891	227
BMgn006424	0.0063202	0.017793	228
BMgn008979	0.0063665	0.017418	229
BMgn015685	0.006369	0.017426	230
BMgn000840	0.0063979	0.012081	231
BMgn009244	0.0064592	0.012179	232
BMgn009965	0.0064825	0.012226	233
BMgn006581	0.0064839	0.0064344	234
BMgn012122	0.0065266	0.017838	235
BMgn000964	0.0065456	0.017888	236
BMgn006955	0.0065593	0.017923	237
BMgn002451	0.0065631	0.012374	238
BMgn007320	0.0066864	0.012623	239
BMgn013220	0.0066954	0.012636	240
BMgn014527	0.0066969	0.018277	241
BMgn016273	0.006721	0.012692	242
BMgn007713	0.0067655	0.012766	243
BMgn010936	0.0067974	0.0067543	244
BMgn007478	0.0068793	0.019168	245
BMgn008958	0.0069522	0.018969	246
BMgn004461	0.0069927	0.019451	247
BMgn006479	0.0069972	0.019087	248
BMgn013674	0.0070273	0.013233	249
BMgn003710	0.0070539	0.0070137	250
BMgn008649	0.0070977	0.019325	251
BMgn013954	0.0071771	0.013478	252
BMgn014074	0.0071976	0.013506	253
BMgn001290	0.0072546	0.013614	254
BMgn015773	0.0073252	0.01374	255
BMgn002846	0.0073356	0.019938	256
BMgn014002	0.0073356	0.019938	257
BMgn004192	0.0073981	0.020089	258
BMgn006404	0.0074059	0.013896	259
BMgn015014	0.0074202	0.020152	260
BMgn005242	0.0074231	0.013923	261
BMgn008413	0.0074814	0.0074341	262
BMgn001589	0.0074816	0.014039	263
BMgn015725	0.0075269	0.020763	264
BMgn007253	0.0075384	0.014139	265
BMgn009066	0.0075582	0.02083	266
BMgn010765	0.0075738	0.020564	267
BMgn004965	0.0075738	0.020564	268
BMgn000732	0.0075904	0.020612	269
BMgn017035	0.0075904	0.020612	270
BMgn010422	0.0075952	0.014248	271
BMgn008769	0.0076009	0.014258	272
BMgn010417	0.0076068	0.02066	273
BMgn011015	0.0076488	0.021054	274
BMgn016971	0.0076848	0.020856	275
BMgn003184	0.0077056	0.014448	276
BMgn000773	0.0077087	0.014455	277
BMgn016523	0.0077094	0.0076588	278
BMgn000326	0.0077457	0.014527	279
BMgn013597	0.007803	0.021173	280
BMgn014713	0.007859	0.014738	281
BMgn007302	0.0079075	0.014826	282
BMgn017032	0.0079731	0.021634	283
BMgn002456	0.0079915	0.02169	284
BMgn001479	0.0081062	0.015175	285
BMgn008332	0.0081916	0.02239	286
BMgn007223	0.0082282	0.022335	287
BMgn011272	0.0083048	0.015552	288
BMgn009549	0.0083529	0.022794	289
BMgn009983	0.0084184	0.015767	290
BMgn015117	0.008464	0.015862	291
BMgn014934	0.0084872	0.023116	292
BMgn016754	0.0085402	0.016013	293
BMgn010358	0.0085402	0.016013	294
BMgn008964	0.0086738	0.016262	295
BMgn013039	0.0087762	0.016456	296
BMgn005402	0.0088157	0.01654	297
BMgn016118	0.0088157	0.01654	298
BMgn005815	0.0088234	0.023389	299
BMgn005717	0.008869	0.02347	300
BMgn013275	0.0089008	0.016705	301
BMgn008799	0.0089237	0.01675	302
BMgn014405	0.0089484	0.027954	303
BMgn002607	0.0089575	0.0168	304
BMgn006790	0.0090154	0.016903	305
BMgn007473	0.0090644	0.02457	306
BMgn011043	0.0090994	0.017059	307
BMgn003524	0.0091213	0.017101	308
BMgn005310	0.0091457	0.024766	309
BMgn006748	0.0091895	0.024015	310
BMgn009484	0.0093265	0.024249	311
BMgn008148	0.0094114	0.017628	312
BMgn010618	0.009423	0.024412	313
BMgn015233	0.0094509	0.017702	314
BMgn014948	0.0095049	0.0094599	315
BMgn013177	0.00951	0.02567	316
BMgn014684	0.0095663	0.024638	317
BMgn015431	0.0095816	0.017949	318
BMgn016163	0.0096122	0.018006	319
BMgn000469	0.0096951	0.018173	320
BMgn016810	0.0097019	0.018195	321
BMgn010652	0.0097247	0.024912	322
BMgn012867	0.0097329	0.0096944	323
BMgn012271	0.0097449	0.026228	324
BMgn015474	0.009758	0.024971	325
BMgn011407	0.0097615	0.0097305	326
BMgn012289	0.0098085	0.018397	327
BMgn000602	0.0098342	0.01845	328
BMgn009050	0.0099503	0.018658	329
BMgn009764	0.010058	0.026945	330
BMgn011012	0.010064	0.018876	331
BMgn008973	0.010098	0.02553	332
BMgn002494	0.010132	0.010082	333
BMgn016044	0.010179	0.025656	334
BMgn011553	0.010183	0.025664	335
BMgn001504	0.010203	0.010153	336
BMgn010620	0.010217	0.019178	337
BMgn017093	0.010277	0.027465	338
BMgn011856	0.010326	0.027576	339
BMgn015198	0.010347	0.019411	340
BMgn008427	0.01036	0.010322	341
BMgn010463	0.010448	0.026091	342
BMgn006283	0.010491	0.031419	343
BMgn006776	0.01065	0.026424	344
BMgn008673	0.01066	0.028369	345
BMgn003976	0.010829	0.020361	346
BMgn006737	0.010853	0.026758	347
BMgn015913	0.010862	0.026776	348
BMgn005210	0.010873	0.01082	349
BMgn000017	0.01093	0.010881	350
BMgn011374	0.010933	0.032417	351
BMgn001562	0.010999	0.020646	352
BMgn012936	0.011051	0.027099	353
BMgn015003	0.011153	0.020946	354
BMgn009125	0.011153	0.020946	355
BMgn010135	0.011169	0.020975	356
BMgn011796	0.011239	0.033094	357
BMgn009976	0.011256	0.027421	358
BMgn012987	0.011283	0.021192	359
BMgn002478	0.011292	0.021211	360
BMgn008564	0.011292	0.021211	361
BMgn004679	0.011316	0.027515	362
BMgn005679	0.011378	0.030096	363
BMgn007313	0.011456	0.02774	364
BMgn006027	0.011486	0.011434	365
BMgn005850	0.011519	0.030428	366
BMgn009152	0.011539	0.027884	367
BMgn014573	0.011591	0.021782	368
BMgn003262	0.011626	0.028022	369
BMgn014488	0.011628	0.011565	370
BMgn014168	0.01167	0.037739	371
BMgn011974	0.01171	0.028161	372
BMgn000671	0.011714	0.011654	373
BMgn010077	0.011736	0.022073	374
BMgn011197	0.011785	0.011727	375
BMgn009677	0.011785	0.011727	376
BMgn002815	0.011793	0.022182	377
BMgn016509	0.011809	0.0311	378
BMgn010079	0.011906	0.022384	379
BMgn002300	0.011943	0.028535	380
BMgn015513	0.011963	0.022493	381
BMgn008514	0.011973	0.031507	382
BMgn000570	0.012006	0.022563	383
BMgn010197	0.012013	0.011947	384
BMgn006889	0.012017	0.031619	385
BMgn017002	0.012026	0.028671	386
BMgn007162	0.012076	0.022706	387
BMgn000711	0.012122	0.022798	388
BMgn003332	0.012127	0.012051	389
BMgn016839	0.012189	0.02293	390
BMgn003711	0.012203	0.022957	391
BMgn011277	0.012211	0.032078	392
BMgn002040	0.012298	0.023124	393
BMgn009576	0.012328	0.029148	394
BMgn015524	0.012336	0.035588	395
BMgn010576	0.012354	0.035627	396
BMgn012630	0.012359	0.023221	397
BMgn003843	0.012384	0.012323	398
BMgn009433	0.012416	0.023331	399
BMgn006750	0.012431	0.029322	400
BMgn009276	0.012473	0.032702	401
BMgn008438	0.012483	0.012419	402
BMgn015615	0.012529	0.023535	403
BMgn003539	0.012548	0.029515	404
BMgn005845	0.012601	0.029583	405
BMgn000431	0.012669	0.012597	406
BMgn004537	0.01268	0.023816	407
BMgn006152	0.01268	0.023816	408
BMgn003803	0.012699	0.023863	409
BMgn010297	0.012771	0.029875	410
BMgn005560	0.012771	0.029875	411
BMgn005374	0.012826	0.033528	412
BMgn005586	0.012867	0.030053	413
BMgn007751	0.012915	0.030144	414
BMgn017492	0.012939	0.012857	415
BMgn002547	0.01298	0.03024	416
BMgn005966	0.01298	0.03024	417
BMgn007347	0.013067	0.030362	418
BMgn012765	0.013094	0.034206	419
BMgn010004	0.013125	0.01304	420
BMgn009443	0.013152	0.024657	421
BMgn016543	0.013176	0.024696	422
BMgn005673	0.013182	0.013094	423
BMgn003952	0.013201	0.030564	424
BMgn003987	0.013265	0.024853	425
BMgn016392	0.013281	0.013196	426
BMgn009986	0.013379	0.025051	427
BMgn004896	0.013402	0.030902	428
BMgn016157	0.013405	0.034958	429
BMgn013867	0.013433	0.035011	430
BMgn011394	0.013439	0.025151	431
BMgn013248	0.013491	0.031037	432
BMgn007501	0.013581	0.013472	433
BMgn013859	0.013609	0.013504	434
BMgn007581	0.013618	0.031227	435
BMgn014295	0.013675	0.031319	436
BMgn008806	0.01378	0.035845	437
BMgn000074	0.013787	0.031491	438
BMgn004421	0.013803	0.025813	439
BMgn011684	0.013803	0.025813	440
BMgn013710	0.013805	0.025818	441
BMgn006186	0.013817	0.03894	442
BMgn017264	0.013844	0.038997	443
BMgn013087	0.013852	0.025895	444
BMgn001133	0.013888	0.025956	445
BMgn008275	0.013923	0.013819	446
BMgn014370	0.013958	0.039258	447
BMgn007943	0.013999	0.031847	448
BMgn017126	0.014065	0.01395	449
BMgn003875	0.014171	0.02648	450
BMgn013565	0.014171	0.02648	451
BMgn012335	0.014216	0.026563	452
BMgn013144	0.014238	0.036987	453
BMgn000254	0.014315	0.032391	454
BMgn003579	0.014359	0.026827	455
BMgn013340	0.014364	0.014258	456
BMgn011912	0.014366	0.032462	457
BMgn008679	0.014426	0.026956	458
BMgn016115	0.014435	0.026973	459
BMgn002704	0.014464	0.014359	460
BMgn001195	0.014473	0.032637	461
BMgn009878	0.014567	0.02719	462
BMgn000029	0.014592	0.032843	463
BMgn017033	0.014606	0.027254	464
BMgn014190	0.014607	0.040681	465
BMgn000131	0.014706	0.014606	466
BMgn011859	0.014728	0.033044	467
BMgn016260	0.014888	0.033303	468
BMgn001232	0.014949	0.014873	469
BMgn005670	0.015001	0.038853	470
BMgn004226	0.015019	0.028024	471
BMgn017489	0.015019	0.028024	472
BMgn006440	0.015019	0.028024	473
BMgn003556	0.01512	0.015049	474
BMgn011418	0.015129	0.039166	475
BMgn012905	0.015133	0.028217	476
BMgn010078	0.015187	0.028318	477
BMgn009948	0.01528	0.033951	478
BMgn014738	0.015333	0.015259	479
BMgn015575	0.015354	0.03408	480
BMgn001732	0.015433	0.015363	481
BMgn000046	0.015433	0.015363	482
BMgn011347	0.015473	0.028854	483
BMgn002103	0.015481	0.034271	484
BMgn010691	0.015533	0.015462	485
BMgn013515	0.015618	0.015542	486
BMgn015769	0.015658	0.029209	487
BMgn004183	0.015665	0.034578	488
BMgn007680	0.015704	0.015631	489
BMgn007172	0.015755	0.029376	490
BMgn009205	0.015797	0.02944	491
BMgn005816	0.015819	0.03483	492
BMgn007885	0.015876	0.029583	493
BMgn001383	0.015876	0.029583	494
BMgn008689	0.01596	0.015892	495
BMgn006481	0.01601	0.029824	496
BMgn011627	0.01601	0.029824	497
BMgn003981	0.01601	0.029824	498
BMgn012316	0.016013	0.02983	499
BMgn001760	0.016102	0.0353	500
BMgn000541	0.016135	0.041593	501
BMgn003177	0.01615	0.030072	502
BMgn004787	0.016151	0.030073	503
BMgn016183	0.016156	0.050586	504
BMgn007201	0.016272	0.041929	505
BMgn013905	0.016539	0.036053	506
BMgn015461	0.016541	0.04254	507
BMgn016012	0.016545	0.016504	508
BMgn017445	0.016547	0.030762	509
BMgn001892	0.016616	0.016578	510
BMgn008177	0.016653	0.036223	511
BMgn001283	0.016687	0.016649	512
BMgn016637	0.016781	0.043101	513
BMgn014727	0.016892	0.04336	514
BMgn003225	0.016964	0.031485	515
BMgn002555	0.017027	0.0316	516
BMgn004931	0.017027	0.0316	517
BMgn000625	0.017029	0.043688	518
BMgn006010	0.017054	0.046157	519
BMgn016902	0.017091	0.036926	520
BMgn011267	0.01713	0.036998	521
BMgn000433	0.01713	0.036998	522
BMgn000324	0.01713	0.036998	523
BMgn006550	0.01716	0.044006	524
BMgn011337	0.017263	0.044241	525
BMgn003024	0.017266	0.032061	526
BMgn008598	0.017314	0.01729	527
BMgn012868	0.017335	0.046766	528
BMgn010151	0.017353	0.032222	529
BMgn015022	0.017383	0.037418	530
BMgn011290	0.017428	0.017403	531
BMgn004268	0.017536	0.03253	532
BMgn009165	0.017546	0.037684	533
BMgn011244	0.017571	0.017546	534
BMgn004313	0.017571	0.017546	535
BMgn000370	0.017649	0.032738	536
BMgn002803	0.017686	0.047509	537
BMgn016139	0.017711	0.032852	538
BMgn007019	0.017721	0.037997	539
BMgn014041	0.017863	0.038219	540
BMgn004530	0.017913	0.017887	541
BMgn005555	0.01796	0.033299	542
BMgn015494	0.017969	0.038382	543
BMgn004617	0.018185	0.033703	544
BMgn017128	0.018185	0.033703	545
BMgn001136	0.018185	0.033703	546
BMgn004008	0.018185	0.033704	547
BMgn002082	0.018242	0.033798	548
BMgn017011	0.018297	0.018254	549
BMgn013329	0.018297	0.018254	550
BMgn015697	0.018369	0.018329	551
BMgn004803	0.018402	0.046937	552
BMgn005788	0.018426	0.018393	553
BMgn012042	0.018452	0.049256	554
BMgn010212	0.018468	0.034221	555
BMgn012492	0.018497	0.034269	556
BMgn014589	0.018563	0.049524	557
BMgn003142	0.018579	0.034403	558
BMgn007632	0.018637	0.034503	559
BMgn002097	0.018649	0.034527	560
BMgn008171	0.018828	0.034843	561
BMgn007743	0.018839	0.018834	562
BMgn008157	0.018889	0.050257	563
BMgn009464	0.018889	0.050257	564
BMgn011320	0.018916	0.057492	565
BMgn008738	0.018959	0.048268	566
BMgn006005	0.01902	0.035182	567
BMgn013820	0.019032	0.035205	568
BMgn009056	0.019038	0.019036	569
BMgn016443	0.019116	0.050735	570
BMgn007812	0.019116	0.048676	571
BMgn015037	0.019167	0.01917	572
BMgn017467	0.019174	0.035456	573
BMgn011961	0.019184	0.040375	574
BMgn004734	0.019184	0.040375	575
BMgn004181	0.019202	0.048867	576
BMgn002767	0.019384	0.040709	577
BMgn001130	0.019404	0.035854	578
BMgn006475	0.019459	0.049514	579
BMgn000115	0.019474	0.049544	580
BMgn000856	0.019491	0.035978	581
BMgn003204	0.019566	0.019598	582
BMgn012558	0.019579	0.04103	583
BMgn016431	0.019644	0.041143	584
BMgn011585	0.019653	0.036285	585
BMgn013888	0.019748	0.041325	586
BMgn005134	0.019775	0.041369	587
BMgn014044	0.019803	0.036573	588
BMgn004259	0.019803	0.036573	589
BMgn002954	0.019803	0.036573	590
BMgn001269	0.019823	0.036618	591
BMgn014768	0.019916	0.041605	592
BMgn000911	0.019933	0.041637	593
BMgn014743	0.019934	0.050588	594
BMgn013099	0.019936	0.036811	595
BMgn006203	0.019992	0.036916	596
BMgn009876	0.020085	0.041907	597
BMgn012091	0.020161	0.051127	598
BMgn010365	0.020207	0.020229	599
BMgn002853	0.020292	0.020307	600
BMgn001883	0.020292	0.020307	601
BMgn002149	0.020302	0.042305	602
BMgn011014	0.020307	0.051454	603
BMgn008180	0.02038	0.042448	604
BMgn000654	0.02038	0.042448	605
BMgn011224	0.020423	0.053571	606
BMgn009343	0.020463	0.051835	607
BMgn010939	0.020511	0.03786	608
BMgn009724	0.020613	0.038059	609
BMgn000493	0.02062	0.020606	610
BMgn016666	0.020691	0.020674	611
BMgn004138	0.020744	0.038296	612
BMgn017316	0.020744	0.038296	613
BMgn002376	0.020744	0.038296	614
BMgn014971	0.020812	0.052619	615
BMgn011185	0.020838	0.038472	616
BMgn010553	0.020886	0.04331	617
BMgn015483	0.020886	0.04331	618
BMgn013335	0.020919	0.020885	619
BMgn009912	0.020923	0.03862	620
BMgn016093	0.020976	0.020937	621
BMgn001291	0.02101	0.043507	622
BMgn009132	0.021062	0.021018	623
BMgn006438	0.021071	0.043602	624
BMgn008166	0.02109	0.03893	625
BMgn006658	0.021092	0.038932	626
BMgn004762	0.021127	0.053337	627
BMgn006854	0.021127	0.053337	628
BMgn003442	0.021127	0.053337	629
BMgn008567	0.021127	0.053337	630
BMgn011962	0.021127	0.05512	631
BMgn009949	0.021176	0.021121	632
BMgn008948	0.021181	0.043789	633
BMgn017303	0.021181	0.039079	634
BMgn017480	0.021181	0.039079	635
BMgn000314	0.021205	0.053529	636
BMgn011017	0.021331	0.039324	637
BMgn011000	0.02135	0.044064	638
BMgn012094	0.02138	0.053908	639
BMgn015672	0.021444	0.03954	640
BMgn011301	0.021515	0.039667	641
BMgn010974	0.021518	0.021464	642
BMgn012841	0.021523	0.039685	643
BMgn016354	0.021571	0.039767	644
BMgn009538	0.021645	0.054524	645
BMgn009671	0.021653	0.054536	646
BMgn004932	0.021668	0.044583	647
BMgn011207	0.021678	0.039978	648
BMgn015017	0.021687	0.044619	649
BMgn002749	0.021853	0.040278	650
BMgn000535	0.021874	0.044931	651
BMgn003610	0.021874	0.044931	652
BMgn017433	0.021931	0.021889	653
BMgn006212	0.02199	0.055323	654
BMgn017265	0.021991	0.045138	655
BMgn010174	0.022024	0.045193	656
BMgn001106	0.022102	0.055579	657
BMgn005255	0.022131	0.02209	658
BMgn015579	0.02215	0.045398	659
BMgn013692	0.022184	0.045451	660
BMgn010118	0.022184	0.045451	661
BMgn011368	0.022206	0.040952	662
BMgn002043	0.022359	0.022328	663
BMgn016923	0.022361	0.041224	664
BMgn008882	0.022361	0.041224	665
BMgn014376	0.022361	0.045718	666
BMgn006598	0.022442	0.056317	667
BMgn017084	0.022473	0.04142	668
BMgn009108	0.022517	0.041507	669
BMgn016531	0.022529	0.046005	670
BMgn013196	0.022554	0.056603	671
BMgn008378	0.022637	0.041736	672
BMgn012225	0.022649	0.041765	673
BMgn013111	0.02267	0.058416	674
BMgn007009	0.022686	0.02266	675
BMgn016592	0.022699	0.041846	676
BMgn011984	0.022758	0.022731	677
BMgn016377	0.0228	0.042031	678
BMgn007538	0.0228	0.042031	679
BMgn001118	0.0228	0.042031	680
BMgn001359	0.022844	0.046528	681
BMgn002062	0.022847	0.05728	682
BMgn005782	0.022865	0.057323	683
BMgn012641	0.022929	0.02289	684
BMgn010097	0.022952	0.042304	685
BMgn013171	0.022952	0.042304	686
BMgn012251	0.023037	0.042456	687
BMgn006129	0.023171	0.023127	688
BMgn017036	0.023238	0.047168	689
BMgn008286	0.023254	0.042834	690
BMgn013809	0.023332	0.042983	691
BMgn016063	0.023346	0.058462	692
BMgn008631	0.023431	0.043163	693
BMgn007322	0.023432	0.043166	694
BMgn014717	0.023506	0.058811	695
BMgn002893	0.023506	0.058811	696
BMgn008945	0.02354	0.04764	697
BMgn006362	0.02354	0.04764	698
BMgn005888	0.023641	0.023583	699
BMgn012249	0.023669	0.043593	700
BMgn015248	0.023669	0.043593	701
BMgn011021	0.023698	0.023641	702
BMgn004694	0.023826	0.023764	703
BMgn012256	0.023866	0.043953	704
BMgn007595	0.023974	0.059911	705
BMgn004545	0.023974	0.059911	706
BMgn011823	0.023974	0.059911	707
BMgn015061	0.024006	0.05998	708
BMgn000308	0.024107	0.044371	709
BMgn016968	0.02422	0.044579	710
BMgn016752	0.024248	0.044631	711
BMgn007225	0.024331	0.044761	712
BMgn017559	0.024331	0.044761	713
BMgn000612	0.024339	0.048955	714
BMgn009510	0.024348	0.062052	715
BMgn015510	0.024393	0.060873	716
BMgn004583	0.024473	0.04502	717
BMgn005646	0.024511	0.0244	718
BMgn014724	0.024557	0.045154	719
BMgn011380	0.024639	0.024527	720
BMgn010844	0.024684	0.049527	721
BMgn006234	0.024684	0.049527	722
BMgn006919	0.024698	0.045376	723
BMgn003908	0.024724	0.024624	724
BMgn011688	0.024724	0.024624	725
BMgn008069	0.024728	0.045425	726
BMgn017044	0.024843	0.049772	727
BMgn004164	0.024843	0.049772	728
BMgn015974	0.024951	0.045822	729
BMgn014267	0.025008	0.045922	730
BMgn012401	0.025012	0.050064	731
BMgn003107	0.025052	0.024978	732
BMgn010771	0.025124	0.046132	733
BMgn001371	0.025124	0.046132	734
BMgn000926	0.025166	0.025088	735
BMgn003396	0.025177	0.046221	736
BMgn015015	0.02518	0.050366	737
BMgn014654	0.02518	0.050366	738
BMgn000777	0.025306	0.050572	739
BMgn016090	0.025349	0.063092	740
BMgn005090	0.025396	0.046613	741
BMgn003915	0.025443	0.063294	742
BMgn007275	0.025443	0.063294	743
BMgn005521	0.025443	0.063294	744
BMgn001792	0.025481	0.050879	745
BMgn004211	0.025508	0.025436	746
BMgn001697	0.025517	0.063455	747
BMgn011271	0.025558	0.050985	748
BMgn010738	0.025619	0.047014	749
BMgn001037	0.025619	0.047014	750
BMgn011102	0.025622	0.051084	751
BMgn016174	0.025622	0.025556	752
BMgn004905	0.025628	0.064816	753
BMgn002172	0.025711	0.047173	754
BMgn013900	0.025726	0.051237	755
BMgn016262	0.025738	0.063935	756
BMgn005861	0.025762	0.051298	757
BMgn011894	0.025796	0.064062	758
BMgn003250	0.025852	0.051446	759
BMgn011681	0.025879	0.025799	760
BMgn011133	0.025908	0.047527	761
BMgn009389	0.026	0.051672	762
BMgn002550	0.026107	0.026034	763
BMgn007932	0.026274	0.048151	764
BMgn009367	0.026278	0.026212	765
BMgn012128	0.026363	0.048299	766
BMgn014898	0.026363	0.048299	767
BMgn002840	0.026363	0.048299	768
BMgn003226	0.026386	0.048335	769
BMgn002410	0.026499	0.048536	770
BMgn005346	0.026499	0.048536	771
BMgn012983	0.026515	0.052489	772
BMgn009157	0.026544	0.065775	773
BMgn006959	0.026577	0.026528	774
BMgn002690	0.026628	0.048797	775
BMgn017096	0.026628	0.048797	776
BMgn008710	0.02665	0.052716	777
BMgn013396	0.026734	0.052841	778
BMgn004258	0.02678	0.049064	779
BMgn008527	0.026786	0.052909	780
BMgn002968	0.026791	0.026734	781
BMgn015348	0.026892	0.049258	782
BMgn001784	0.026944	0.053148	783
BMgn017144	0.027048	0.049522	784
BMgn017182	0.02705	0.053313	785
BMgn006167	0.027132	0.068076	786
BMgn007541	0.027202	0.049791	787
BMgn006626	0.027249	0.067408	788
BMgn008492	0.0275	0.050311	789
BMgn007602	0.027567	0.050426	790
BMgn008554	0.027657	0.054291	791
BMgn008005	0.02766	0.027616	792
BMgn004853	0.027802	0.027739	793
BMgn000881	0.027916	0.027859	794
BMgn002341	0.028013	0.051167	795
BMgn002516	0.028077	0.05496	796
BMgn007945	0.028101	0.051339	797
BMgn006503	0.028166	0.055095	798
BMgn000863	0.028269	0.051616	799
BMgn001931	0.028319	0.070649	800
BMgn013022	0.028321	0.055373	801
BMgn013863	0.028348	0.051739	802
BMgn001414	0.028386	0.051807	803
BMgn008827	0.028422	0.055532	804
BMgn015814	0.028515	0.028454	805
BMgn002217	0.028522	0.052082	806
BMgn001491	0.028607	0.052214	807
BMgn005884	0.028658	0.071368	808
BMgn011122	0.028748	0.056099	809
BMgn016583	0.028804	0.071671	810
BMgn013315	0.028857	0.056268	811
BMgn012059	0.028972	0.05286	812
BMgn003677	0.029038	0.052981	813
BMgn005688	0.029164	0.053204	814
BMgn014731	0.029219	0.070999	815
BMgn004214	0.02927	0.029223	816
BMgn011367	0.029279	0.072659	817
BMgn002902	0.029281	0.053411	818
BMgn004180	0.029315	0.053476	819
BMgn003300	0.029315	0.053476	820
BMgn015246	0.029365	0.05356	821
BMgn009027	0.029366	0.057067	822
BMgn012502	0.029366	0.057067	823
BMgn010371	0.029424	0.071296	824
BMgn014111	0.029449	0.053724	825
BMgn015120	0.02947	0.029416	826
BMgn007186	0.02967	0.057566	827
BMgn012779	0.029673	0.071626	828
BMgn016584	0.029673	0.071626	829
BMgn002725	0.029674	0.054124	830
BMgn015184	0.029753	0.05771	831
BMgn009111	0.029797	0.029747	832
BMgn000971	0.029797	0.029747	833
BMgn014803	0.029814	0.071846	834
BMgn001261	0.02985	0.054413	835
BMgn009626	0.029963	0.058016	836
BMgn005566	0.030111	0.05485	837
BMgn007652	0.030149	0.072328	838
BMgn006614	0.030173	0.058343	839
BMgn012610	0.03026	0.055093	840
BMgn006988	0.03026	0.072478	841
BMgn015293	0.030293	0.058531	842
BMgn005771	0.030293	0.058531	843
BMgn007470	0.030374	0.055285	844
BMgn015976	0.03041	0.030317	845
BMgn004396	0.03041	0.030317	846
BMgn014256	0.030461	0.058785	847
BMgn007608	0.030483	0.072791	848
BMgn015323	0.030528	0.055558	849
BMgn012912	0.030624	0.030535	850
BMgn001864	0.030663	0.055772	851
BMgn012861	0.030759	0.059254	852
BMgn013948	0.030766	0.059264	853
BMgn001404	0.030817	0.07326	854
BMgn016728	0.030824	0.056084	855
BMgn004391	0.030894	0.059489	856
BMgn000598	0.030926	0.059547	857
BMgn004538	0.030937	0.030846	858
BMgn007830	0.030937	0.030846	859
BMgn004306	0.030993	0.056346	860
BMgn012024	0.03101	0.059674	861
BMgn003273	0.031104	0.059819	862
BMgn009582	0.031168	0.076685	863
BMgn001893	0.031329	0.056937	864
BMgn011950	0.031536	0.031461	865
BMgn004557	0.031582	0.057405	866
BMgn015703	0.03168	0.060722	867
BMgn004584	0.031707	0.03164	868
BMgn005266	0.031763	0.074594	869
BMgn012152	0.031778	0.03172	870
BMgn002754	0.031842	0.057849	871
BMgn016701	0.031847	0.06099	872
BMgn016355	0.031862	0.057889	873
BMgn002693	0.031973	0.061201	874
BMgn012674	0.031973	0.061201	875
BMgn008521	0.032047	0.061313	876
BMgn010569	0.032134	0.032094	877
BMgn005779	0.032153	0.075136	878
BMgn015239	0.032163	0.058426	879
BMgn001635	0.032163	0.058426	880
BMgn004247	0.032163	0.058426	881
BMgn005561	0.032199	0.058491	882
BMgn016691	0.032277	0.061686	883
BMgn007487	0.032319	0.075379	884
BMgn007031	0.032349	0.061803	885
BMgn001081	0.032377	0.032341	886
BMgn012761	0.032377	0.032341	887
BMgn016984	0.032496	0.059016	888
BMgn009365	0.032496	0.059016	889
BMgn001189	0.032548	0.032522	890
BMgn014956	0.032645	0.059283	891
BMgn016717	0.032675	0.059344	892
BMgn004256	0.032676	0.032649	893
BMgn000855	0.032726	0.062399	894
BMgn017307	0.03278	0.06248	895
BMgn002118	0.032831	0.059627	896
BMgn000713	0.032893	0.062662	897
BMgn016349	0.033017	0.076358	898
BMgn015681	0.033048	0.059991	899
BMgn001270	0.03307	0.062966	900
BMgn008928	0.033144	0.063081	901
BMgn003490	0.033152	0.06016	902
BMgn006333	0.033189	0.033172	903
BMgn016690	0.033353	0.063399	904
BMgn001904	0.033386	0.063452	905
BMgn002668	0.0336	0.06097	906
BMgn012194	0.033656	0.061063	907
BMgn015118	0.033687	0.063953	908
BMgn000020	0.033852	0.06138	909
BMgn015421	0.033854	0.064261	910
BMgn008133	0.033882	0.06144	911
BMgn014584	0.034015	0.033976	912
BMgn006703	0.03404	0.06172	913
BMgn016716	0.034048	0.061735	914
BMgn000003	0.034048	0.061735	915
BMgn012816	0.034063	0.064579	916
BMgn000565	0.03416	0.06193	917
BMgn004684	0.034166	0.064737	918
BMgn000571	0.034272	0.062117	919
BMgn015123	0.034351	0.06224	920
BMgn010857	0.034384	0.062305	921
BMgn007698	0.034462	0.065224	922
BMgn001601	0.034486	0.034447	923
BMgn001139	0.034598	0.078607	924
BMgn002039	0.03469	0.062808	925
BMgn001297	0.03469	0.062808	926
BMgn016992	0.03469	0.062808	927
BMgn012507	0.03469	0.062808	928
BMgn013322	0.034764	0.078836	929
BMgn012506	0.034865	0.063091	930
BMgn005187	0.034873	0.084532	931
BMgn001074	0.034899	0.034897	932
BMgn000282	0.034918	0.063189	933
BMgn002388	0.034971	0.066054	934
BMgn008886	0.034986	0.079146	935
BMgn016822	0.035041	0.063426	936
BMgn013911	0.03507	0.084941	937
BMgn006372	0.035107	0.066263	938
BMgn005652	0.035185	0.066397	939
BMgn017068	0.035224	0.063736	940
BMgn006363	0.035362	0.063981	941
BMgn003165	0.035362	0.063981	942
BMgn004371	0.035392	0.064025	943
BMgn002404	0.035398	0.066744	944
BMgn013351	0.035398	0.066744	945
BMgn017024	0.035523	0.06424	946
BMgn016236	0.035608	0.067072	947
BMgn004218	0.035656	0.067155	948
BMgn008701	0.035738	0.064601	949
BMgn015874	0.035811	0.03577	950
BMgn015969	0.035924	0.080513	951
BMgn011773	0.035924	0.080513	952
BMgn006341	0.035942	0.067595	953
BMgn009063	0.035949	0.067604	954
BMgn012321	0.036025	0.035986	955
BMgn001267	0.036078	0.06522	956
BMgn008187	0.036284	0.065559	957
BMgn013181	0.036295	0.036241	958
BMgn005390	0.036317	0.081062	959
BMgn010873	0.036347	0.068241	960
BMgn003390	0.036409	0.036379	961
BMgn016913	0.036484	0.068454	962
BMgn012705	0.036583	0.06611	963
BMgn010767	0.036583	0.06611	964
BMgn002084	0.036583	0.06611	965
BMgn011719	0.036738	0.068855	966
BMgn002173	0.036738	0.068855	967
BMgn014075	0.036738	0.068855	968
BMgn007784	0.036738	0.068855	969
BMgn016586	0.036789	0.081733	970
BMgn004345	0.036816	0.081764	971
BMgn001493	0.036817	0.068986	972
BMgn006809	0.036862	0.066593	973
BMgn006042	0.036875	0.066617	974
BMgn013562	0.036908	0.036854	975
BMgn000739	0.037008	0.03697	976
BMgn005140	0.037038	0.08208	977
BMgn014032	0.037043	0.069328	978
BMgn001594	0.037094	0.037048	979
BMgn011471	0.037236	0.069607	980
BMgn015995	0.037236	0.037201	981
BMgn017205	0.03729	0.067322	982
BMgn004756	0.037359	0.069799	983
BMgn001259	0.037376	0.069828	984
BMgn010255	0.037376	0.069828	985
BMgn008011	0.037463	0.067635	986
BMgn008866	0.037478	0.037443	987
BMgn004967	0.037519	0.067715	988
BMgn007989	0.037526	0.07008	989
BMgn009477	0.037575	0.067825	990
BMgn014445	0.037632	0.06793	991
BMgn004712	0.037711	0.070372	992
BMgn014226	0.037714	0.068061	993
BMgn006730	0.037714	0.068061	994
BMgn009402	0.037721	0.037701	995
BMgn009166	0.037754	0.068116	996
BMgn006842	0.037813	0.083186	997
BMgn010514	0.037957	0.090978	998
BMgn016069	0.037966	0.068491	999
BMgn008059	0.03798	0.083423	1000
BMgn005203	0.038077	0.038036	1001
BMgn017119	0.038134	0.068799	1002
BMgn004279	0.038153	0.068847	1003
BMgn005217	0.038153	0.068847	1004
BMgn005331	0.038256	0.083829	1005
BMgn014052	0.038376	0.038314	1006
BMgn009253	0.038377	0.083997	1007
BMgn009180	0.038385	0.06926	1008
BMgn015054	0.038588	0.084285	1009
BMgn016023	0.038606	0.071796	1010
BMgn008711	0.038699	0.084448	1011
BMgn013880	0.038734	0.072016	1012
BMgn015038	0.038734	0.072016	1013
BMgn008833	0.038734	0.069878	1014
BMgn005485	0.038742	0.084513	1015
BMgn006661	0.038747	0.038702	1016
BMgn006722	0.038921	0.084761	1017
BMgn016939	0.038921	0.084761	1018
BMgn010920	0.038942	0.070247	1019
BMgn001441	0.038942	0.070247	1020
BMgn001975	0.038942	0.070247	1021
BMgn014919	0.039044	0.072508	1022
BMgn003459	0.039084	0.070518	1023
BMgn009641	0.039142	0.085086	1024
BMgn010500	0.03915	0.072688	1025
BMgn006900	0.039274	0.039232	1026
BMgn003190	0.039279	0.070864	1027
BMgn002101	0.039314	0.070913	1028
BMgn010948	0.039314	0.070913	1029
BMgn006359	0.039314	0.070913	1030
BMgn015220	0.039314	0.070913	1031
BMgn007485	0.039375	0.093924	1032
BMgn010925	0.039524	0.071257	1033
BMgn011605	0.039602	0.039535	1034
BMgn006471	0.039698	0.071579	1035
BMgn010662	0.039705	0.071596	1036
BMgn001642	0.039705	0.071596	1037
BMgn009727	0.039716	0.039646	1038
BMgn006190	0.039735	0.085963	1039
BMgn002877	0.039838	0.071835	1040
BMgn008408	0.040006	0.072124	1041
BMgn004898	0.040143	0.040073	1042
BMgn003439	0.040271	0.040209	1043
BMgn004611	0.040288	0.074521	1044
BMgn005821	0.04031	0.072638	1045
BMgn001545	0.040357	0.074632	1046
BMgn005999	0.040368	0.072741	1047
BMgn013024	0.040368	0.072741	1048
BMgn008590	0.040434	0.074773	1049
BMgn006510	0.040477	0.087045	1050
BMgn003601	0.04048	0.07293	1051
BMgn014682	0.040499	0.040446	1052
BMgn011679	0.040579	0.096485	1053
BMgn011560	0.04062	0.073166	1054
BMgn015787	0.04067	0.040603	1055
BMgn008067	0.04067	0.040603	1056
BMgn002200	0.040731	0.073354	1057
BMgn012854	0.040735	0.075253	1058
BMgn007464	0.040849	0.073566	1059
BMgn012820	0.040898	0.075512	1060
BMgn008121	0.040927	0.040856	1061
BMgn017048	0.040955	0.073744	1062
BMgn012358	0.041012	0.040937	1063
BMgn014269	0.041122	0.0739	1064
BMgn014825	0.041122	0.0739	1065
BMgn012276	0.041124	0.097614	1066
BMgn005002	0.041169	0.041096	1067
BMgn011340	0.041206	0.073964	1068
BMgn015327	0.041376	0.07631	1069
BMgn006380	0.041376	0.07631	1070
BMgn012976	0.041376	0.07631	1071
BMgn008938	0.041397	0.076353	1072
BMgn011576	0.041521	0.076551	1073
BMgn004531	0.041654	0.04162	1074
BMgn007272	0.04168	0.07436	1075
BMgn013462	0.04168	0.07436	1076
BMgn005480	0.041701	0.09886	1077
BMgn016213	0.041739	0.088833	1078
BMgn006965	0.041771	0.076926	1079
BMgn005220	0.041825	0.041782	1080
BMgn002832	0.042043	0.074646	1081
BMgn006761	0.042103	0.077451	1082
BMgn015146	0.042103	0.077451	1083
BMgn002654	0.04221	0.074787	1084
BMgn009491	0.042263	0.077695	1085
BMgn006406	0.042263	0.077695	1086
BMgn004718	0.042347	0.089674	1087
BMgn001315	0.042395	0.042361	1088
BMgn013771	0.042495	0.078067	1089
BMgn007670	0.042513	0.10058	1090
BMgn014636	0.04258	0.04253	1091
BMgn014874	0.042651	0.042602	1092
BMgn009035	0.042712	0.075184	1093
BMgn010644	0.042751	0.042713	1094
BMgn009185	0.042751	0.042713	1095
BMgn007600	0.042803	0.07859	1096
BMgn015716	0.042803	0.07859	1097
BMgn001458	0.042851	0.042814	1098
BMgn015352	0.04288	0.075307	1099
BMgn003086	0.042922	0.042883	1100
BMgn000687	0.042935	0.075352	1101
BMgn016700	0.043018	0.078923	1102
BMgn015858	0.043141	0.079107	1103
BMgn005254	0.043224	0.090922	1104
BMgn002266	0.043242	0.075609	1105
BMgn015449	0.043307	0.079384	1106
BMgn009995	0.043361	0.10232	1107
BMgn003911	0.043394	0.091184	1108
BMgn013774	0.043421	0.043406	1109
BMgn001057	0.043473	0.079661	1110
BMgn015857	0.04352	0.0435	1111
BMgn007669	0.043628	0.079904	1112
BMgn012391	0.043628	0.079904	1113
BMgn017158	0.043716	0.075988	1114
BMgn006989	0.043883	0.076126	1115
BMgn014598	0.043883	0.076126	1116
BMgn015848	0.04393	0.080391	1117
BMgn015065	0.043946	0.091948	1118
BMgn015554	0.043976	0.043935	1119
BMgn013080	0.043986	0.080473	1120
BMgn002461	0.044019	0.043976	1121
BMgn015627	0.044136	0.092213	1122
BMgn002852	0.044147	0.044116	1123
BMgn015918	0.044166	0.080756	1124
BMgn014615	0.044346	0.081033	1125
BMgn001410	0.044346	0.081033	1126
BMgn014866	0.044385	0.076534	1127
BMgn012916	0.044469	0.081224	1128
BMgn001593	0.044524	0.076661	1129
BMgn015128	0.044646	0.044635	1130
BMgn012536	0.044646	0.044635	1131
BMgn000474	0.044747	0.076845	1132
BMgn000291	0.04476	0.044752	1133
BMgn010008	0.04486	0.081869	1134
BMgn000053	0.04486	0.081869	1135
BMgn016250	0.04486	0.081869	1136
BMgn008789	0.044888	0.044897	1137
BMgn012245	0.044888	0.044897	1138
BMgn013261	0.044967	0.082045	1139
BMgn012560	0.044967	0.082045	1140
BMgn014426	0.045076	0.10842	1141
BMgn000270	0.045109	0.077127	1142
BMgn001198	0.045132	0.082289	1143
BMgn004372	0.045132	0.082289	1144
BMgn007333	0.045143	0.10602	1145
BMgn010123	0.045189	0.1061	1146
BMgn010020	0.045276	0.077269	1147
BMgn016423	0.045298	0.082533	1148
BMgn001241	0.045387	0.077342	1149
BMgn012985	0.045471	0.07741	1150
BMgn005435	0.045471	0.07741	1151
BMgn005332	0.045582	0.077498	1152
BMgn017014	0.045588	0.082983	1153
BMgn000018	0.045666	0.077567	1154
BMgn017361	0.045708	0.094406	1155
BMgn015761	0.0459	0.045897	1156
BMgn016055	0.045916	0.077778	1157
BMgn016836	0.046	0.077843	1158
BMgn004172	0.046003	0.083661	1159
BMgn005413	0.046028	0.046021	1160
BMgn008962	0.046028	0.046021	1161
BMgn006337	0.046038	0.094888	1162
BMgn003770	0.046068	0.083766	1163
BMgn010163	0.046111	0.077935	1164
BMgn015299	0.046195	0.077992	1165
BMgn002399	0.046195	0.077992	1166
BMgn002183	0.04631	0.084174	1167
BMgn010124	0.046334	0.078107	1168
BMgn003508	0.046529	0.078252	1169
BMgn010924	0.046612	0.078323	1170
BMgn015680	0.046678	0.084784	1171
BMgn006939	0.046724	0.078408	1172
BMgn004540	0.046727	0.046743	1173
BMgn004508	0.046812	0.046822	1174
BMgn001889	0.046869	0.046876	1175
BMgn002563	0.046891	0.078538	1176
BMgn015924	0.046974	0.078615	1177
BMgn008818	0.047037	0.096265	1178
BMgn005149	0.047169	0.078769	1179
BMgn000514	0.047211	0.047234	1180
BMgn016757	0.04728	0.078864	1181
BMgn013508	0.047339	0.047363	1182
BMgn012667	0.047486	0.086031	1183
BMgn017422	0.047488	0.096856	1184
BMgn009702	0.047493	0.086046	1185
BMgn004033	0.04753	0.07906	1186
BMgn002860	0.047596	0.047605	1187
BMgn016575	0.047643	0.086258	1188
BMgn007722	0.0477	0.08635	1189
BMgn005043	0.047808	0.079262	1190
BMgn007643	0.04781	0.086536	1191
BMgn011648	0.047824	0.086558	1192
BMgn015199	0.047904	0.11158	1193
BMgn013912	0.04799	0.086823	1194
BMgn015227	0.048003	0.079399	1195
BMgn013860	0.048008	0.097555	1196
BMgn007416	0.048008	0.097555	1197
BMgn016221	0.048008	0.097555	1198
BMgn011525	0.048127	0.097709	1199
BMgn006403	0.048127	0.097709	1200
BMgn017505	0.04826	0.11234	1201
BMgn013618	0.048309	0.079652	1202
BMgn012409	0.048321	0.087367	1203
BMgn006130	0.048408	0.048412	1204
BMgn009239	0.048408	0.048412	1205
BMgn001683	0.048408	0.048412	1206
BMgn012895	0.048419	0.087528	1207
BMgn002597	0.04867	0.079947	1208
BMgn007673	0.04867	0.079947	1209
BMgn013440	0.048894	0.088268	1210
BMgn006018	0.048894	0.088268	1211
BMgn004666	0.0489	0.088277	1212
BMgn014547	0.048907	0.098766	1213
BMgn002312	0.049006	0.098889	1214
BMgn008043	0.049024	0.088454	1215
BMgn011327	0.049136	0.099081	1216
BMgn015062	0.049148	0.088641	1217
BMgn006084	0.04917	0.09914	1218
BMgn010645	0.049178	0.049265	1219
BMgn010675	0.049178	0.049265	1220
BMgn012971	0.049281	0.088864	1221
BMgn002698	0.049306	0.049397	1222
BMgn015794	0.049479	0.08918	1223
BMgn010584	0.049623	0.099803	1224
BMgn015706	0.049662	0.049761	1225
BMgn007387	0.049699	0.080807	1226
BMgn004670	0.049829	0.089689	1227
BMgn005379	0.049838	0.080925	1228
BMgn007668	0.049862	0.049962	1229
BMgn009687	0.049889	0.089779	1230
BMgn015893	0.050048	0.1004	1231
BMgn001369	0.050049	0.11601	1232
BMgn012993	0.050059	0.090039	1233
BMgn004206	0.050059	0.090039	1234
BMgn000280	0.050158	0.10054	1235
BMgn004502	0.050199	0.0812	1236
BMgn003801	0.050199	0.0812	1237
BMgn010354	0.05031	0.090418	1238
BMgn013903	0.05033	0.090455	1239
BMgn006875	0.050365	0.081337	1240
BMgn003783	0.050377	0.10087	1241
BMgn013982	0.050445	0.11681	1242
BMgn008482	0.050445	0.11681	1243
BMgn011265	0.050449	0.081402	1244
BMgn015709	0.05046	0.05052	1245
BMgn012324	0.05047	0.090669	1246
BMgn003176	0.050489	0.050546	1247
BMgn016199	0.050562	0.10114	1248
BMgn006166	0.050761	0.10142	1249
BMgn016911	0.050761	0.10142	1250
BMgn013663	0.050849	0.10155	1251
BMgn015300	0.050853	0.091304	1252
BMgn005175	0.050931	0.050988	1253
BMgn014725	0.050976	0.081832	1254
BMgn008444	0.051059	0.051121	1255
BMgn012768	0.051173	0.05123	1256
BMgn005956	0.051213	0.091897	1257
BMgn001922	0.051254	0.082047	1258
BMgn013975	0.051292	0.11855	1259
BMgn008505	0.051372	0.051442	1260
BMgn010725	0.051372	0.051442	1261
BMgn011219	0.051372	0.051442	1262
BMgn016873	0.051532	0.082267	1263
BMgn011013	0.051532	0.082267	1264
BMgn000276	0.051532	0.082267	1265
BMgn007168	0.051541	0.092421	1266
BMgn008803	0.051601	0.092503	1267
BMgn016240	0.051786	0.051854	1268
BMgn008892	0.052014	0.052074	1269
BMgn013581	0.052039	0.093183	1270
BMgn001480	0.052039	0.093183	1271
BMgn009750	0.052273	0.093546	1272
BMgn010195	0.052273	0.093546	1273
BMgn010539	0.052284	0.052346	1274
BMgn003478	0.052447	0.083023	1275
BMgn000925	0.052447	0.083023	1276
BMgn012035	0.052447	0.083023	1277
BMgn007739	0.052447	0.083023	1278
BMgn008228	0.052459	0.10381	1279
BMgn004255	0.052534	0.093989	1280
BMgn009057	0.052624	0.10404	1281
BMgn002714	0.052698	0.05274	1282
BMgn000906	0.052825	0.094444	1283
BMgn009815	0.052842	0.10434	1284
BMgn008826	0.053113	0.08356	1285
BMgn014647	0.053161	0.12236	1286
BMgn013849	0.053235	0.095073	1287
BMgn016766	0.05337	0.095278	1288
BMgn001843	0.05337	0.095278	1289
BMgn015179	0.053418	0.083806	1290
BMgn001027	0.053519	0.10532	1291
BMgn006982	0.053554	0.10536	1292
BMgn016043	0.053576	0.095622	1293
BMgn007936	0.05364	0.083988	1294
BMgn015839	0.05364	0.083988	1295
BMgn016449	0.05371	0.09582	1296
BMgn008014	0.053917	0.084237	1297
BMgn013372	0.053917	0.084237	1298
BMgn005663	0.053966	0.053963	1299
BMgn002823	0.054145	0.096487	1300
BMgn009756	0.054155	0.10624	1301
BMgn017234	0.054351	0.054321	1302
BMgn009086	0.054395	0.12488	1303
BMgn014338	0.054429	0.096954	1304
BMgn003859	0.054444	0.08469	1305
BMgn003765	0.054479	0.054438	1306
BMgn000569	0.054553	0.097137	1307
BMgn012048	0.054555	0.084783	1308
BMgn012136	0.054558	0.10682	1309
BMgn000989	0.054591	0.097213	1310
BMgn002557	0.054591	0.097213	1311
BMgn013659	0.054647	0.10695	1312
BMgn005955	0.054676	0.097358	1313
BMgn009684	0.054778	0.054741	1314
BMgn001061	0.054778	0.054741	1315
BMgn017109	0.054778	0.054741	1316
BMgn010413	0.05481	0.097608	1317
BMgn010566	0.054811	0.1072	1318
BMgn009177	0.054832	0.085016	1319
BMgn014034	0.054832	0.085016	1320
BMgn010494	0.055006	0.09792	1321
BMgn009562	0.055077	0.055036	1322
BMgn004623	0.055077	0.055036	1323
BMgn010835	0.055092	0.098046	1324
BMgn017101	0.055092	0.098046	1325
BMgn009819	0.055109	0.085261	1326
BMgn013151	0.055253	0.098305	1327
BMgn004469	0.055253	0.098305	1328
BMgn001289	0.05533	0.085437	1329
BMgn008361	0.055405	0.055347	1330
BMgn013336	0.055437	0.098604	1331
BMgn008550	0.055449	0.10805	1332
BMgn010503	0.055459	0.098631	1333
BMgn008952	0.055552	0.08561	1334
BMgn004163	0.055635	0.085669	1335
BMgn000075	0.055761	0.055694	1336
BMgn010733	0.055774	0.085787	1337
BMgn010985	0.05589	0.10867	1338
BMgn007400	0.05589	0.10867	1339
BMgn013359	0.055896	0.12793	1340
BMgn005159	0.055967	0.085931	1341
BMgn011191	0.055967	0.085931	1342
BMgn013499	0.055967	0.085931	1343
BMgn016872	0.056257	0.09986	1344
BMgn006847	0.056257	0.09986	1345
BMgn004485	0.056257	0.09986	1346
BMgn003755	0.056257	0.09986	1347
BMgn001731	0.056274	0.056208	1348
BMgn016680	0.056405	0.10008	1349
BMgn010965	0.056418	0.10941	1350
BMgn009327	0.056631	0.056559	1351
BMgn011357	0.056631	0.056559	1352
BMgn003798	0.056652	0.1005	1353
BMgn011854	0.056654	0.12941	1354
BMgn004860	0.056722	0.10983	1355
BMgn006473	0.05673	0.05665	1356
BMgn002078	0.056798	0.086624	1357
BMgn012030	0.056816	0.10075	1358
BMgn010492	0.056816	0.10075	1359
BMgn016858	0.056816	0.10075	1360
BMgn012133	0.056891	0.11007	1361
BMgn005373	0.056891	0.11007	1362
BMgn010916	0.056987	0.056936	1363
BMgn007479	0.057022	0.10105	1364
BMgn003517	0.057144	0.057107	1365
BMgn010028	0.057264	0.11058	1366
BMgn011956	0.057322	0.11067	1367
BMgn012719	0.057324	0.087057	1368
BMgn012478	0.057343	0.057305	1369
BMgn002510	0.057343	0.057305	1370
BMgn014494	0.057351	0.10156	1371
BMgn007432	0.057351	0.10156	1372
BMgn016871	0.057379	0.10161	1373
BMgn011406	0.057379	0.10161	1374
BMgn016477	0.057474	0.10175	1375
BMgn004093	0.057585	0.05756	1376
BMgn015342	0.057683	0.087353	1377
BMgn008562	0.05772	0.10213	1378
BMgn013795	0.05787	0.11149	1379
BMgn016959	0.057877	0.087505	1380
BMgn001730	0.05796	0.08757	1381
BMgn001755	0.057967	0.10253	1382
BMgn001633	0.057984	0.05797	1383
BMgn012423	0.058086	0.13223	1384
BMgn000160	0.058086	0.13223	1385
BMgn016162	0.058254	0.10297	1386
BMgn002748	0.058337	0.10311	1387
BMgn004104	0.058355	0.058321	1388
BMgn009923	0.058458	0.087976	1389
BMgn010999	0.058467	0.11231	1390
BMgn005682	0.058467	0.11231	1391
BMgn009268	0.058526	0.058482	1392
BMgn009645	0.058536	0.1124	1393
BMgn008141	0.058536	0.1124	1394
BMgn014109	0.05865	0.10359	1395
BMgn004489	0.05865	0.10359	1396
BMgn009946	0.05865	0.10359	1397
BMgn015678	0.058706	0.10367	1398
BMgn015841	0.058706	0.10367	1399
BMgn008239	0.058706	0.10367	1400
BMgn001364	0.058707	0.088177	1401
BMgn009866	0.058709	0.13348	1402
BMgn004849	0.058939	0.058897	1403
BMgn016755	0.058939	0.058897	1404
BMgn002288	0.05912	0.11325	1405
BMgn017560	0.059124	0.059086	1406
BMgn007634	0.059124	0.059086	1407
BMgn013131	0.059199	0.10443	1408
BMgn010138	0.05931	0.059283	1409
BMgn013575	0.05958	0.059572	1410
BMgn005021	0.059664	0.13539	1411
BMgn003666	0.059674	0.088954	1412
BMgn017177	0.05975	0.10531	1413
BMgn002045	0.05975	0.10531	1414
BMgn013533	0.05975	0.10531	1415
BMgn014474	0.059895	0.089124	1416
BMgn016089	0.060199	0.089365	1417
BMgn017157	0.060199	0.089365	1418
BMgn001077	0.060236	0.060243	1419
BMgn016562	0.060281	0.10615	1420
BMgn016529	0.060281	0.10615	1421
BMgn016899	0.060464	0.060471	1422
BMgn001820	0.060531	0.089668	1423
BMgn010513	0.060531	0.089668	1424
BMgn009265	0.060531	0.089668	1425
BMgn013405	0.060862	0.11562	1426
BMgn011155	0.060863	0.060884	1427
BMgn010373	0.060918	0.089963	1428
BMgn007820	0.061262	0.061276	1429
BMgn011939	0.061351	0.11633	1430
BMgn010049	0.061359	0.090308	1431
BMgn009279	0.061359	0.090308	1432
BMgn009964	0.061379	0.11638	1433
BMgn000742	0.061663	0.090586	1434
BMgn011341	0.061675	0.061663	1435
BMgn013333	0.061675	0.061663	1436
BMgn014964	0.061676	0.11679	1437
BMgn005827	0.061677	0.11679	1438
BMgn007217	0.061832	0.10858	1439
BMgn011713	0.061876	0.10866	1440
BMgn006145	0.061989	0.06197	1441
BMgn002252	0.062151	0.10909	1442
BMgn012678	0.062231	0.062227	1443
BMgn004186	0.062243	0.09105	1444
BMgn012080	0.062298	0.091098	1445
BMgn008478	0.062329	0.11776	1446
BMgn013862	0.062546	0.091306	1447
BMgn005982	0.062573	0.062551	1448
BMgn000817	0.062573	0.062551	1449
BMgn008160	0.062643	0.10987	1450
BMgn004347	0.062822	0.091534	1451
BMgn009440	0.062988	0.091684	1452
BMgn012234	0.062988	0.091684	1453
BMgn013734	0.063089	0.11883	1454
BMgn001533	0.063123	0.1106	1455
BMgn004394	0.063175	0.11069	1456
BMgn017043	0.063319	0.09195	1457
BMgn012185	0.063368	0.11096	1458
BMgn013586	0.063379	0.11097	1459
BMgn011071	0.063429	0.092039	1460
BMgn002719	0.063514	0.063513	1461
BMgn016202	0.063622	0.092216	1462
BMgn008450	0.063686	0.1197	1463
BMgn003329	0.063723	0.1115	1464
BMgn005418	0.063723	0.1115	1465
BMgn006909	0.063856	0.11994	1466
BMgn012706	0.063911	0.11176	1467
BMgn008184	0.064036	0.092551	1468
BMgn016067	0.064119	0.092614	1469
BMgn006391	0.064174	0.09266	1470
BMgn016029	0.064255	0.064251	1471
BMgn005380	0.064283	0.12056	1472
BMgn012505	0.064283	0.12056	1473
BMgn001651	0.064353	0.12065	1474
BMgn009855	0.064394	0.092859	1475
BMgn017539	0.064398	0.14141	1476
BMgn011473	0.06445	0.092914	1477
BMgn016408	0.064497	0.064502	1478
BMgn002536	0.064605	0.11286	1479
BMgn007723	0.064607	0.11287	1480
BMgn002471	0.064725	0.064739	1481
BMgn001144	0.064729	0.11307	1482
BMgn006423	0.064761	0.12125	1483
BMgn008124	0.064761	0.12125	1484
BMgn015331	0.064796	0.064818	1485
BMgn014772	0.064808	0.093221	1486
BMgn008317	0.064973	0.093362	1487
BMgn002328	0.065166	0.093514	1488
BMgn000321	0.065167	0.065197	1489
BMgn005323	0.065261	0.1139	1490
BMgn006554	0.065383	0.11411	1491
BMgn010670	0.065387	0.093697	1492
BMgn005165	0.065402	0.11414	1493
BMgn008092	0.065402	0.11414	1494
BMgn007345	0.065421	0.12223	1495
BMgn002413	0.065421	0.12223	1496
BMgn013288	0.065551	0.065587	1497
BMgn000305	0.065552	0.093831	1498
BMgn009007	0.065746	0.12269	1499
BMgn012512	0.065746	0.12269	1500
BMgn012875	0.065882	0.094105	1501
BMgn008258	0.06591	0.11492	1502
BMgn013376	0.06591	0.11492	1503
BMgn008867	0.065963	0.12299	1504
BMgn013474	0.066037	0.11511	1505
BMgn012339	0.066103	0.094288	1506
BMgn010003	0.066241	0.11543	1507
BMgn014631	0.066342	0.12353	1508
BMgn008983	0.066407	0.1157	1509
BMgn008209	0.066407	0.1157	1510
BMgn014042	0.066478	0.066544	1511
BMgn013357	0.066884	0.11643	1512
BMgn005907	0.066884	0.11643	1513
BMgn005136	0.066884	0.11643	1514
BMgn011332	0.066976	0.11658	1515
BMgn001815	0.067043	0.1167	1516
BMgn017525	0.067058	0.11672	1517
BMgn004229	0.067094	0.095091	1518
BMgn012726	0.067094	0.095091	1519
BMgn014530	0.0672	0.12477	1520
BMgn015661	0.067304	0.06734	1521
BMgn007862	0.067304	0.06734	1522
BMgn016579	0.067304	0.06734	1523
BMgn004566	0.067408	0.11727	1524
BMgn005908	0.067475	0.067499	1525
BMgn000153	0.067499	0.14517	1526
BMgn001396	0.067632	0.067649	1527
BMgn016051	0.067782	0.095635	1528
BMgn010167	0.067796	0.11785	1529
BMgn012685	0.067888	0.067915	1530
BMgn011926	0.067892	0.12576	1531
BMgn002394	0.067911	0.12578	1532
BMgn006991	0.067911	0.12578	1533
BMgn007078	0.06792	0.095765	1534
BMgn004334	0.068094	0.11828	1535
BMgn005550	0.068416	0.068432	1536
BMgn010978	0.068416	0.068432	1537
BMgn000006	0.068452	0.12651	1538
BMgn014650	0.06847	0.096238	1539
BMgn003408	0.06869	0.1192	1540
BMgn002389	0.068773	0.096504	1541
BMgn012627	0.068773	0.096504	1542
BMgn000875	0.0689	0.068909	1543
BMgn008312	0.068965	0.096657	1544
BMgn011503	0.068992	0.1273	1545
BMgn002908	0.06926	0.12006	1546
BMgn014981	0.069289	0.12011	1547
BMgn002120	0.069289	0.12011	1548
BMgn005221	0.069328	0.069361	1549
BMgn012173	0.069328	0.069361	1550
BMgn002243	0.06935	0.096977	1551
BMgn003296	0.069442	0.069476	1552
BMgn002796	0.069515	0.097116	1553
BMgn011945	0.069519	0.14765	1554
BMgn008802	0.069613	0.069633	1555
BMgn005880	0.069613	0.12816	1556
BMgn009214	0.069707	0.097269	1557
BMgn016380	0.069707	0.097269	1558
BMgn014057	0.069707	0.097269	1559
BMgn007015	0.069748	0.12835	1560
BMgn014208	0.070018	0.12124	1561
BMgn007156	0.070072	0.12881	1562
BMgn004415	0.070083	0.07008	1563
BMgn011007	0.070083	0.07008	1564
BMgn007450	0.070197	0.12151	1565
BMgn015649	0.070238	0.12156	1566
BMgn009733	0.07034	0.097789	1567
BMgn008650	0.07034	0.097789	1568
BMgn012931	0.070411	0.070379	1569
BMgn008837	0.070442	0.12189	1570
BMgn013237	0.070529	0.12202	1571
BMgn005984	0.070539	0.070513	1572
BMgn016130	0.070612	0.12958	1573
BMgn013233	0.070644	0.12962	1574
BMgn007137	0.070767	0.07075	1575
BMgn017193	0.070935	0.13	1576
BMgn007679	0.071215	0.12308	1577
BMgn012479	0.071427	0.12342	1578
BMgn001911	0.071508	0.071486	1579
BMgn014133	0.071508	0.071486	1580
BMgn014359	0.071581	0.12366	1581
BMgn006528	0.071713	0.098933	1582
BMgn012407	0.071798	0.13122	1583
BMgn008599	0.071823	0.099003	1584
BMgn013960	0.071848	0.12409	1585
BMgn010868	0.071866	0.12411	1586
BMgn010647	0.071872	0.15858	1587
BMgn010244	0.071933	0.099095	1588
BMgn016400	0.071933	0.099095	1589
BMgn007124	0.071933	0.099095	1590
BMgn014211	0.071965	0.13145	1591
BMgn003128	0.071992	0.071958	1592
BMgn003155	0.07218	0.099301	1593
BMgn016657	0.07218	0.099301	1594
BMgn007113	0.072312	0.13194	1595
BMgn000084	0.072448	0.072439	1596
BMgn008918	0.072454	0.09954	1597
BMgn004944	0.072517	0.12514	1598
BMgn013728	0.072576	0.12524	1599
BMgn015712	0.072576	0.12524	1600
BMgn008808	0.072613	0.13236	1601
BMgn015983	0.072613	0.13236	1602
BMgn016265	0.07266	0.13243	1603
BMgn005636	0.072701	0.099754	1604
BMgn000226	0.072801	0.12558	1605
BMgn012499	0.072984	0.13289	1606
BMgn007181	0.07299	0.072981	1607
BMgn002758	0.07299	0.072981	1608
BMgn015607	0.07299	0.072981	1609
BMgn017076	0.073042	0.15191	1610
BMgn001715	0.073045	0.12593	1611
BMgn000836	0.073086	0.10006	1612
BMgn008980	0.073195	0.10016	1613
BMgn014051	0.073359	0.13342	1614
BMgn007204	0.073361	0.073317	1615
BMgn013244	0.073361	0.073317	1616
BMgn006313	0.073546	0.07352	1617
BMgn014324	0.073552	0.10046	1618
BMgn000781	0.073552	0.10046	1619
BMgn012956	0.073663	0.12686	1620
BMgn014594	0.073744	0.10062	1621
BMgn007289	0.073789	0.13404	1622
BMgn017186	0.073909	0.10074	1623
BMgn010405	0.073959	0.073933	1624
BMgn010296	0.074183	0.10096	1625
BMgn001096	0.074183	0.10096	1626
BMgn003242	0.074222	0.15335	1627
BMgn009238	0.074345	0.12791	1628
BMgn009517	0.074375	0.10113	1629
BMgn011764	0.074472	0.074447	1630
BMgn002503	0.074472	0.074447	1631
BMgn002076	0.074472	0.074447	1632
BMgn016339	0.074512	0.10123	1633
BMgn011249	0.074544	0.15377	1634
BMgn014749	0.074657	0.074636	1635
BMgn015589	0.074704	0.1014	1636
BMgn008610	0.074704	0.1014	1637
BMgn004088	0.074704	0.1014	1638
BMgn008343	0.074813	0.13542	1639
BMgn003893	0.074985	0.074943	1640
BMgn000823	0.075005	0.10165	1641
BMgn002660	0.075006	0.15435	1642
BMgn005951	0.075114	0.12908	1643
BMgn015486	0.075114	0.12908	1644
BMgn012673	0.075279	0.1019	1645
BMgn003966	0.075279	0.1019	1646
BMgn014732	0.07536	0.12947	1647
BMgn015771	0.075455	0.075412	1648
BMgn013699	0.075455	0.075412	1649
BMgn000309	0.075455	0.075412	1650
BMgn008507	0.075455	0.075412	1651
BMgn010002	0.075553	0.10215	1652
BMgn003187	0.075644	0.12995	1653
BMgn013794	0.075718	0.1023	1654
BMgn001571	0.075773	0.10235	1655
BMgn003835	0.075797	0.1302	1656
BMgn007649	0.075797	0.1302	1657
BMgn011033	0.075887	0.13033	1658
BMgn015657	0.075887	0.13033	1659
BMgn016207	0.075992	0.10253	1660
BMgn001486	0.075997	0.075968	1661
BMgn001005	0.075997	0.075968	1662
BMgn014557	0.076066	0.13721	1663
BMgn014838	0.076145	0.13076	1664
BMgn002588	0.076293	0.13099	1665
BMgn015611	0.076481	0.076474	1666
BMgn015495	0.076481	0.076474	1667
BMgn010073	0.076493	0.15619	1668
BMgn009163	0.076535	0.13782	1669
BMgn015956	0.076842	0.13825	1670
BMgn005810	0.076891	0.13191	1671
BMgn013362	0.076961	0.15679	1672
BMgn008493	0.076966	0.07699	1673
BMgn010217	0.077005	0.10337	1674
BMgn017302	0.077037	0.077058	1675
BMgn015973	0.077199	0.13874	1676
BMgn000039	0.077217	0.13245	1677
BMgn005741	0.077284	0.13885	1678
BMgn007300	0.077306	0.10361	1679
BMgn017098	0.077306	0.10361	1680
BMgn015894	0.077351	0.077353	1681
BMgn014897	0.077438	0.15737	1682
BMgn010345	0.077438	0.15737	1683
BMgn009826	0.077622	0.13934	1684
BMgn001668	0.07763	0.13311	1685
BMgn011990	0.07763	0.13311	1686
BMgn014379	0.077635	0.10388	1687
BMgn009583	0.077821	0.13961	1688
BMgn000583	0.077821	0.13961	1689
BMgn004648	0.077892	0.077923	1690
BMgn002354	0.077907	0.13355	1691
BMgn005079	0.077907	0.13355	1692
BMgn003426	0.078018	0.10417	1693
BMgn009972	0.078106	0.078142	1694
BMgn008996	0.078223	0.13406	1695
BMgn011706	0.078248	0.078294	1696
BMgn008743	0.078346	0.10446	1697
BMgn004027	0.078511	0.10459	1698
BMgn004458	0.078564	0.13457	1699
BMgn005060	0.078602	0.13463	1700
BMgn011171	0.078732	0.14089	1701
BMgn004284	0.078818	0.078859	1702
BMgn015059	0.078932	0.078971	1703
BMgn017411	0.079097	0.1594	1704
BMgn004288	0.079112	0.10509	1705
BMgn013404	0.079169	0.13551	1706
BMgn009351	0.079222	0.10517	1707
BMgn006535	0.079289	0.079357	1708
BMgn003095	0.079289	0.079357	1709
BMgn013493	0.079304	0.14166	1710
BMgn007455	0.079364	0.15974	1711
BMgn004735	0.079371	0.13584	1712
BMgn000866	0.079417	0.079492	1713
BMgn011024	0.07959	0.14206	1714
BMgn002450	0.079687	0.10555	1715
BMgn013456	0.079687	0.10555	1716
BMgn004385	0.079697	0.16016	1717
BMgn006753	0.07973	0.079797	1718
BMgn009034	0.07973	0.079797	1719
BMgn013457	0.079775	0.13646	1720
BMgn001313	0.079883	0.13662	1721
BMgn011055	0.079883	0.13662	1722
BMgn013296	0.079883	0.13662	1723
BMgn005453	0.079987	0.080044	1724
BMgn011542	0.079987	0.080044	1725
BMgn016803	0.079987	0.1058	1726
BMgn000653	0.079987	0.1058	1727
BMgn000311	0.080059	0.13688	1728
BMgn015218	0.080178	0.13705	1729
BMgn007016	0.080229	0.080279	1730
BMgn013856	0.080229	0.080279	1731
BMgn012573	0.080229	0.080279	1732
BMgn006093	0.080342	0.13731	1733
BMgn005580	0.080343	0.10609	1734
BMgn010043	0.080357	0.080404	1735
BMgn000802	0.080643	0.10633	1736
BMgn017262	0.080828	0.080862	1737
BMgn000490	0.080874	0.14383	1738
BMgn004865	0.080892	0.13816	1739
BMgn000040	0.080971	0.1066	1740
BMgn005458	0.080971	0.1066	1741
BMgn003074	0.080971	0.1066	1742
BMgn002699	0.08111	0.1385	1743
BMgn009842	0.081198	0.08121	1744
BMgn008309	0.081249	0.13873	1745
BMgn008443	0.081249	0.13873	1746
BMgn012542	0.081265	0.14438	1747
BMgn007039	0.081302	0.14444	1748
BMgn006684	0.081408	0.10698	1749
BMgn015377	0.08144	0.081473	1750
BMgn007843	0.081572	0.10711	1751
BMgn015124	0.081682	0.13939	1752
BMgn005225	0.081756	0.1395	1753
BMgn004517	0.081825	0.08184	1754
BMgn011170	0.0819	0.10739	1755
BMgn005764	0.0819	0.10739	1756
BMgn009773	0.0819	0.10739	1757
BMgn001934	0.081998	0.13989	1758
BMgn007405	0.082004	0.1399	1759
BMgn012111	0.082004	0.1399	1760
BMgn013689	0.082051	0.14541	1761
BMgn009729	0.082253	0.082262	1762
BMgn001306	0.082364	0.10777	1763
BMgn012828	0.082451	0.14058	1764
BMgn016160	0.082483	0.14063	1765
BMgn015768	0.082538	0.082529	1766
BMgn006356	0.08261	0.10797	1767
BMgn007631	0.082637	0.082627	1768
BMgn002897	0.082765	0.14106	1769
BMgn008858	0.082777	0.14639	1770
BMgn012645	0.082865	0.082851	1771
BMgn012021	0.08291	0.10822	1772
BMgn014367	0.082967	0.14135	1773
BMgn012785	0.083128	0.1416	1774
BMgn010338	0.083156	0.10843	1775
BMgn014233	0.083161	0.14692	1776
BMgn001434	0.083435	0.083412	1777
BMgn014896	0.083523	0.14218	1778
BMgn007001	0.08363	0.14756	1779
BMgn012398	0.083653	0.1424	1780
BMgn007498	0.083653	0.1424	1781
BMgn008857	0.083674	0.10885	1782
BMgn013034	0.083674	0.10885	1783
BMgn005718	0.083692	0.08367	1784
BMgn003549	0.083692	0.08367	1785
BMgn013714	0.083814	0.14264	1786
BMgn007408	0.084137	0.14313	1787
BMgn001739	0.084161	0.14316	1788
BMgn013354	0.084165	0.10927	1789
BMgn016500	0.084267	0.14842	1790
BMgn005923	0.084294	0.14846	1791
BMgn007856	0.084376	0.084346	1792
BMgn003752	0.084376	0.084346	1793
BMgn017332	0.084399	0.1435	1794
BMgn008123	0.084419	0.14352	1795
BMgn005856	0.084438	0.1095	1796
BMgn013051	0.084438	0.1095	1797
BMgn012826	0.084661	0.14388	1798
BMgn014811	0.084746	0.18201	1799
BMgn000998	0.084889	0.08483	1800
BMgn003680	0.084889	0.08483	1801
BMgn011593	0.084943	0.14429	1802
BMgn002914	0.084952	0.1443	1803
BMgn007695	0.084952	0.1443	1804
BMgn017449	0.085041	0.14947	1805
BMgn008455	0.085064	0.14449	1806
BMgn014415	0.085147	0.11012	1807
BMgn003999	0.085147	0.11012	1808
BMgn009505	0.085218	0.16708	1809
BMgn014228	0.08531	0.11026	1810
BMgn012799	0.085587	0.085538	1811
BMgn012283	0.085587	0.085538	1812
BMgn009273	0.085587	0.085538	1813
BMgn004336	0.08561	0.11051	1814
BMgn013929	0.08561	0.11051	1815
BMgn012120	0.08561	0.11051	1816
BMgn003493	0.085772	0.14553	1817
BMgn004870	0.085772	0.14553	1818
BMgn007294	0.085841	0.15054	1819
BMgn003812	0.08599	0.14586	1820
BMgn005421	0.086151	0.14611	1821
BMgn017527	0.086272	0.14629	1822
BMgn002439	0.086328	0.086306	1823
BMgn005575	0.086342	0.15126	1824
BMgn010578	0.086346	0.11112	1825
BMgn011016	0.086346	0.11112	1826
BMgn012010	0.086346	0.11112	1827
BMgn005044	0.086346	0.11112	1828
BMgn004028	0.086346	0.11112	1829
BMgn003963	0.086393	0.14647	1830
BMgn008042	0.086513	0.14664	1831
BMgn002884	0.086595	0.14676	1832
BMgn007802	0.086595	0.14676	1833
BMgn007466	0.086727	0.11143	1834
BMgn005432	0.086755	0.14697	1835
BMgn006002	0.08677	0.086726	1836
BMgn002230	0.08677	0.086726	1837
BMgn016359	0.086809	0.16903	1838
BMgn014004	0.086834	0.16905	1839
BMgn009414	0.086972	0.11163	1840
BMgn013001	0.086972	0.11163	1841
BMgn004802	0.087005	0.15216	1842
BMgn009499	0.087066	0.15224	1843
BMgn011294	0.087197	0.14763	1844
BMgn012700	0.087197	0.14763	1845
BMgn013883	0.087299	0.11192	1846
BMgn006279	0.087299	0.11192	1847
BMgn012258	0.087462	0.11206	1848
BMgn008755	0.087472	0.14806	1849
BMgn010239	0.087472	0.14806	1850
BMgn013428	0.087704	0.15313	1851
BMgn007849	0.087761	0.14849	1852
BMgn015538	0.088007	0.11253	1853
BMgn000151	0.088148	0.14906	1854
BMgn011873	0.088148	0.14906	1855
BMgn000512	0.088148	0.14906	1856
BMgn012368	0.088148	0.14906	1857
BMgn010881	0.088148	0.14906	1858
BMgn014026	0.088163	0.14908	1859
BMgn000008	0.088163	0.14908	1860
BMgn002253	0.088225	0.11271	1861
BMgn008102	0.088225	0.11271	1862
BMgn017268	0.088557	0.14966	1863
BMgn008009	0.088687	0.11312	1864
BMgn007556	0.088687	0.11312	1865
BMgn006740	0.088687	0.11312	1866
BMgn009711	0.088765	0.14998	1867
BMgn009307	0.088822	0.088778	1868
BMgn003389	0.088839	0.15009	1869
BMgn008244	0.088839	0.15009	1870
BMgn006960	0.089064	0.089032	1871
BMgn006287	0.089087	0.15503	1872
BMgn000945	0.089095	0.11345	1873
BMgn004652	0.089095	0.11345	1874
BMgn005707	0.089258	0.11359	1875
BMgn003791	0.089353	0.1554	1876
BMgn004929	0.089422	0.11374	1877
BMgn011825	0.089512	0.1556	1878
BMgn013904	0.089549	0.089531	1879
BMgn011325	0.089549	0.089531	1880
BMgn005886	0.089559	0.15115	1881
BMgn000210	0.089621	0.15574	1882
BMgn016284	0.089694	0.11398	1883
BMgn004992	0.089694	0.11398	1884
BMgn012552	0.089938	0.11418	1885
BMgn006207	0.090005	0.089999	1886
BMgn008165	0.090204	0.090203	1887
BMgn001402	0.09021	0.11442	1888
BMgn013857	0.090319	0.15226	1889
BMgn002966	0.090372	0.15234	1890
BMgn011009	0.090447	0.090458	1891
BMgn015666	0.090482	0.15693	1892
BMgn004858	0.090589	0.09059	1893
BMgn005343	0.090613	0.15273	1894
BMgn011949	0.090613	0.15273	1895
BMgn007950	0.091107	0.1152	1896
BMgn011886	0.091107	0.1152	1897
BMgn016075	0.091147	0.15356	1898
BMgn012510	0.091147	0.15356	1899
BMgn014491	0.091147	0.15356	1900
BMgn004121	0.091302	0.091322	1901
BMgn004066	0.091375	0.1539	1902
BMgn004230	0.091433	0.11547	1903
BMgn000922	0.091473	0.091483	1904
BMgn001138	0.091678	0.11567	1905
BMgn003021	0.091678	0.11567	1906
BMgn010152	0.092004	0.15488	1907
BMgn003335	0.092004	0.15488	1908
BMgn016987	0.092085	0.11601	1909
BMgn002586	0.092137	0.15509	1910
BMgn011433	0.09218	0.15925	1911
BMgn011765	0.092219	0.15931	1912
BMgn010182	0.092413	0.092403	1913
BMgn009397	0.092413	0.092403	1914
BMgn005927	0.092438	0.1163	1915
BMgn001631	0.092601	0.11645	1916
BMgn015799	0.092601	0.11645	1917
BMgn016158	0.092786	0.15609	1918
BMgn004724	0.092786	0.15609	1919
BMgn017209	0.092786	0.15609	1920
BMgn012763	0.092802	0.1601	1921
BMgn004575	0.092855	0.092834	1922
BMgn006811	0.092927	0.11672	1923
BMgn004453	0.092927	0.11672	1924
BMgn010599	0.092927	0.11672	1925
BMgn016807	0.092955	0.17655	1926
BMgn017099	0.093365	0.16087	1927
BMgn009880	0.093388	0.11711	1928
BMgn015048	0.093411	0.093385	1929
BMgn011342	0.093482	0.17722	1930
BMgn000904	0.093551	0.11727	1931
BMgn016145	0.093619	0.15739	1932
BMgn009816	0.093681	0.093663	1933
BMgn000470	0.093681	0.093663	1934
BMgn003732	0.093701	0.15751	1935
BMgn004286	0.093701	0.15751	1936
BMgn006033	0.093701	0.15751	1937
BMgn003164	0.093768	0.11745	1938
BMgn009026	0.093819	0.15769	1939
BMgn011257	0.094003	0.15797	1940
BMgn009326	0.094039	0.11768	1941
BMgn001620	0.094161	0.15821	1942
BMgn014728	0.094202	0.11782	1943
BMgn003576	0.094202	0.11782	1944
BMgn011411	0.094242	0.17817	1945
BMgn007052	0.094379	0.15851	1946
BMgn010464	0.094465	0.094477	1947
BMgn006794	0.094473	0.11806	1948
BMgn016799	0.094529	0.15875	1949
BMgn010372	0.094535	0.17854	1950
BMgn008839	0.094636	0.11819	1951
BMgn001733	0.09469	0.11823	1952
BMgn010957	0.094693	0.094694	1953
BMgn009355	0.09476	0.16279	1954
BMgn006938	0.09486	0.15926	1955
BMgn014031	0.09495	0.094946	1956
BMgn002963	0.09495	0.094946	1957
BMgn009376	0.09495	0.094946	1958
BMgn007147	0.09495	0.1594	1959
BMgn003753	0.09501	0.17908	1960
BMgn015106	0.095012	0.16314	1961
BMgn004767	0.095219	0.15979	1962
BMgn002684	0.095505	0.095487	1963
BMgn014470	0.095611	0.16396	1964
BMgn006303	0.095611	0.16396	1965
BMgn006222	0.095666	0.11904	1966
BMgn016176	0.095755	0.1606	1967
BMgn015169	0.095755	0.1606	1968
BMgn009296	0.095846	0.18016	1969
BMgn009006	0.095846	0.18016	1970
BMgn008540	0.095857	0.16431	1971
BMgn001294	0.095859	0.16074	1972
BMgn014126	0.095937	0.11927	1973
BMgn008566	0.095937	0.11927	1974
BMgn010596	0.095961	0.095926	1975
BMgn016100	0.095961	0.095926	1976
BMgn001665	0.096262	0.11951	1977
BMgn006943	0.096375	0.096351	1978
BMgn014090	0.096479	0.11969	1979
BMgn003743	0.096479	0.11969	1980
BMgn013997	0.096479	0.11969	1981
BMgn007417	0.096505	0.16521	1982
BMgn015926	0.096505	0.16521	1983
BMgn010875	0.096698	0.16201	1984
BMgn008724	0.096702	0.096682	1985
BMgn009698	0.096702	0.096682	1986
BMgn014139	0.096804	0.11996	1987
BMgn008776	0.096836	0.18141	1988
BMgn002278	0.096856	0.16224	1989
BMgn001832	0.096856	0.16224	1990
BMgn010926	0.096856	0.16224	1991
BMgn004074	0.096856	0.16224	1992
BMgn009009	0.0969	0.16577	1993
BMgn005296	0.096927	0.16582	1994
BMgn000449	0.096927	0.16582	1995
BMgn009292	0.097178	0.16274	1996
BMgn004904	0.097215	0.097177	1997
BMgn005041	0.097237	0.12032	1998
BMgn008060	0.097326	0.16639	1999
[truncated: 13,074 more rows]

## Sheet: positive screening in NPV
Gene ID	pos|score	pos|p-value	pos|rank
BMgn004477	6.86e-06	2.4e-05	1
BMgn008956	2.82e-05	9.23e-05	2
BMgn013496	2.85e-05	4.43e-05	3
BMgn009047	3.55e-05	0.00017111	4
BMgn009713	3.63e-05	6.01e-05	5
BMgn015391	3.7e-05	6.08e-05	6
BMgn015639	8.55e-05	0.0001606	7
BMgn012529	0.0002046	0.00061647	8
BMgn005573	0.00021374	0.00064997	9
BMgn011447	0.00023644	0.00087462	10
BMgn017019	0.00023656	0.0007104	11
BMgn009201	0.00026212	0.0007774	12
BMgn016571	0.00029045	0.0010546	13
BMgn001509	0.00029926	0.00029855	14
BMgn014795	0.00030042	0.0010822	15
BMgn005470	0.00032224	0.00095345	16
BMgn013926	0.00035626	0.00035504	17
BMgn016587	0.00036321	0.0010888	18
BMgn016733	0.00037047	0.00071435	19
BMgn007770	0.00039895	0.0014284	20
BMgn014088	0.00042572	0.0012635	21
BMgn017356	0.00043968	0.0013042	22
BMgn008433	0.00047026	0.00047524	23
BMgn004850	0.00047955	0.0014225	24
BMgn000432	0.00051291	0.0018514	25
BMgn007330	0.00054144	0.0010237	26
BMgn000652	0.00054683	0.0019755	27
BMgn014335	0.00055693	0.0029457	28
BMgn014429	0.00057416	0.0020826	29
BMgn010960	0.0005793	0.001094	30
BMgn013102	0.00061276	0.00061779	31
BMgn015752	0.00062687	0.0022711	32
BMgn016701	0.00064113	0.0018658	33
BMgn013894	0.0006637	0.0019276	34
BMgn005524	0.00069941	0.0020169	35
BMgn017168	0.00071467	0.002059	36
BMgn005382	0.00072024	0.0020734	37
BMgn010089	0.00076937	0.0014435	38
BMgn001999	0.00077183	0.0022278	39
BMgn017204	0.00078377	0.00079186	40
BMgn015993	0.00080461	0.0028952	41
BMgn009540	0.00085153	0.0024406	42
BMgn015751	0.00090705	0.0032761	43
BMgn012221	0.00091238	0.002614	44
BMgn010439	0.00091699	0.0017272	45
BMgn002641	0.00094254	0.0034062	46
BMgn017283	0.00096867	0.0034942	47
BMgn015201	0.00098295	0.0028137	48
BMgn001286	0.00099727	0.0018836	49
BMgn011830	0.0010093	0.0036308	50
BMgn013408	0.0010545	0.0010316	51
BMgn010112	0.0010848	0.0031277	52
BMgn017051	0.0011108	0.0049879	53
BMgn015526	0.0011112	0.0021233	54
BMgn016353	0.0011167	0.0021391	55
BMgn014924	0.001117	0.0032177	56
BMgn000344	0.0012271	0.0035126	57
BMgn003555	0.0012821	0.0024603	58
BMgn016073	0.0013093	0.0037248	59
BMgn006888	0.0013247	0.0037714	60
BMgn004653	0.0013549	0.0026022	61
BMgn014156	0.0013654	0.0026212	62
BMgn004335	0.0013794	0.0049728	63
BMgn002538	0.001396	0.0026738	64
BMgn012348	0.0014393	0.0040585	65
BMgn016289	0.0014623	0.0074466	66
BMgn002886	0.00151	0.002903	67
BMgn009907	0.0015165	0.0054661	68
BMgn010961	0.0015232	0.0067089	69
BMgn005958	0.0015253	0.0055023	70
BMgn003094	0.0015809	0.0044782	71
BMgn002441	0.0016046	0.0030962	72
BMgn005450	0.0016138	0.0031178	73
BMgn015870	0.0016228	0.0045978	74
BMgn015914	0.0016388	0.0016169	75
BMgn007215	0.001652	0.0059325	76
BMgn012344	0.0016701	0.0047318	77
BMgn005173	0.0017238	0.0048819	78
BMgn002533	0.0017238	0.0048819	79
BMgn002221	0.0017238	0.0048819	80
BMgn012277	0.0018097	0.0064994	81
BMgn003879	0.0018313	0.0035612	82
BMgn008021	0.0018517	0.0036	83
BMgn008032	0.0018828	0.0053105	84
BMgn015942	0.0018977	0.0036926	85
BMgn016642	0.0019027	0.0037044	86
BMgn000108	0.0019234	0.0054175	87
BMgn004615	0.0019656	0.0038384	88
BMgn016154	0.0019997	0.0056205	89
BMgn014606	0.0020079	0.0056422	90
BMgn007492	0.0020225	0.0039494	91
BMgn012374	0.0020497	0.0040026	92
BMgn008035	0.0021787	0.006104	93
BMgn007886	0.0021823	0.0078158	94
BMgn006168	0.0022674	0.0081107	95
BMgn013157	0.0022943	0.0022816	96
BMgn009033	0.0023072	0.0044913	97
BMgn008271	0.0023933	0.0046542	98
BMgn003795	0.0024214	0.006751	99
BMgn011249	0.0024281	0.010512	100
BMgn016667	0.0024348	0.0067832	101
BMgn010005	0.0025274	0.0070479	102
BMgn001799	0.0025349	0.0049117	103
BMgn017196	0.0025369	0.0090618	104
BMgn008557	0.0025434	0.0049229	105
BMgn016312	0.0025723	0.0071701	106
BMgn004765	0.0025793	0.0025713	107
BMgn016833	0.0025919	0.0050234	108
BMgn001513	0.0025954	0.0050319	109
BMgn008773	0.0026078	0.0025989	110
BMgn011474	0.0026488	0.0051239	111
BMgn016910	0.002667	0.0094698	112
BMgn012139	0.0026754	0.0074558	113
BMgn013140	0.0027057	0.0052415	114
BMgn008932	0.0027105	0.0075524	115
BMgn014190	0.0027337	0.011813	116
BMgn014403	0.0027646	0.0027487	117
BMgn005157	0.0027646	0.0027487	118
BMgn014887	0.0028204	0.010033	119
BMgn006154	0.0028382	0.010098	120
BMgn014375	0.0028643	0.0028531	121
BMgn008495	0.0028816	0.005545	122
BMgn006345	0.0029	0.008089	123
BMgn009385	0.0029275	0.010412	124
BMgn015929	0.0029562	0.012731	125
BMgn006956	0.0030353	0.0030226	126
BMgn006953	0.0030618	0.005878	127
BMgn015949	0.0030638	0.0030462	128
BMgn013250	0.0031042	0.0059522	129
BMgn011403	0.0032899	0.0063036	130
BMgn003649	0.0033318	0.0063798	131
BMgn017403	0.0033365	0.014225	132
BMgn011726	0.0034176	0.012031	133
BMgn015515	0.0035025	0.0066938	134
BMgn000786	0.0035056	0.003483	135
BMgn006948	0.0035056	0.003483	136
BMgn001289	0.0035594	0.0068048	137
BMgn012823	0.0035634	0.0068127	138
BMgn007428	0.0035688	0.0098842	139
BMgn001618	0.0035861	0.0099283	140
BMgn014313	0.0035862	0.012598	141
BMgn009016	0.0037301	0.0071405	142
BMgn015829	0.0037426	0.0071655	143
BMgn014623	0.0037478	0.0036959	144
BMgn007715	0.003787	0.0072311	145
BMgn011129	0.0038056	0.0072673	146
BMgn014658	0.0038136	0.01336	147
BMgn002152	0.0038439	0.0073402	148
BMgn016825	0.0038744	0.010706	149
BMgn016270	0.0039257	0.010852	150
BMgn016795	0.0039845	0.011023	151
BMgn015553	0.0040231	0.0076772	152
BMgn007615	0.0040714	0.007779	153
BMgn004757	0.0040993	0.011329	154
BMgn016569	0.0041148	0.011381	155
BMgn003953	0.0041202	0.014379	156
BMgn011745	0.0041202	0.014379	157
BMgn004398	0.0041202	0.014379	158
BMgn010428	0.0041202	0.014379	159
BMgn002629	0.0041324	0.011422	160
BMgn005015	0.0041411	0.011441	161
BMgn014311	0.0041968	0.017669	162
BMgn013897	0.004202	0.014666	163
BMgn014339	0.0042114	0.014694	164
BMgn015650	0.0042608	0.004226	165
BMgn003717	0.0042705	0.0081468	166
BMgn003329	0.0043116	0.011896	167
BMgn005012	0.0043388	0.018251	168
BMgn002406	0.0043558	0.0083064	169
BMgn008268	0.0043819	0.015267	170
BMgn005991	0.0043891	0.0043344	171
BMgn010882	0.0044773	0.012365	172
BMgn014546	0.0044955	0.015649	173
BMgn008871	0.0045308	0.015768	174
BMgn005968	0.0045674	0.012603	175
BMgn003959	0.0045799	0.0086979	176
BMgn012137	0.0045833	0.0087032	177
BMgn002041	0.0045833	0.0087032	178
BMgn007585	0.0046239	0.019365	179
BMgn006041	0.0046598	0.004605	180
BMgn000513	0.0047155	0.016412	181
BMgn005477	0.0047155	0.016412	182
BMgn005782	0.0047227	0.016443	183
BMgn002091	0.0047539	0.0090251	184
BMgn014789	0.0048056	0.013228	185
BMgn007246	0.0048056	0.013228	186
BMgn013724	0.0048056	0.013228	187
BMgn002834	0.0048363	0.016835	188
BMgn016019	0.004887	0.020411	189
BMgn006707	0.0049249	0.01357	190
BMgn015359	0.0049316	0.013587	191
BMgn007021	0.0049657	0.0094619	192
BMgn005961	0.0050787	0.013988	193
BMgn014904	0.0050874	0.0050267	194
BMgn006916	0.0051496	0.014186	195
BMgn006562	0.0051639	0.014219	196
BMgn010350	0.005185	0.0098796	197
BMgn006289	0.0052014	0.0051416	198
BMgn016861	0.0052299	0.0051679	199
BMgn014016	0.0052591	0.010001	200
BMgn006721	0.0053077	0.018364	201
BMgn008338	0.0053934	0.018645	202
BMgn016565	0.0054689	0.018899	203
BMgn013464	0.0056067	0.01063	204
BMgn011068	0.0056192	0.019424	205
BMgn008062	0.0056192	0.019424	206
BMgn008842	0.0056636	0.010735	207
BMgn009269	0.0056669	0.015575	208
BMgn017575	0.0057749	0.019961	209
BMgn016567	0.0058189	0.011032	210
BMgn015916	0.0058341	0.01107	211
BMgn014177	0.0058454	0.016052	212
BMgn013492	0.0058582	0.020239	213
BMgn013522	0.0059478	0.01127	214
BMgn004884	0.0060158	0.016486	215
BMgn008398	0.0060206	0.011406	216
BMgn002543	0.0061502	0.016831	217
BMgn011181	0.0061502	0.016831	218
BMgn011910	0.0061502	0.016831	219
BMgn004152	0.0061502	0.016831	220
BMgn013963	0.0061502	0.016831	221
BMgn001685	0.0061502	0.016831	222
BMgn014003	0.0061835	0.025447	223
BMgn014343	0.0061854	0.011695	224
BMgn011242	0.0061861	0.01693	225
BMgn015944	0.0061899	0.011706	226
BMgn014691	0.0062225	0.025594	227
BMgn013534	0.0062712	0.017165	228
BMgn013380	0.006275	0.021581	229
BMgn001838	0.006275	0.021581	230
BMgn010126	0.006275	0.021581	231
BMgn006095	0.006275	0.021581	232
BMgn013545	0.006275	0.021581	233
BMgn012642	0.0063129	0.0062708	234
BMgn015958	0.0063252	0.011949	235
BMgn015355	0.0063455	0.011988	236
BMgn005585	0.0063569	0.012007	237
BMgn007964	0.0063699	0.0063253	238
BMgn010858	0.0063751	0.012035	239
BMgn009377	0.0063855	0.026172	240
BMgn017578	0.0063855	0.026172	241
BMgn007262	0.0063989	0.017516	242
BMgn017255	0.0064024	0.01209	243
BMgn007826	0.0064126	0.029919	244
BMgn009537	0.0064839	0.01773	245
BMgn016759	0.006516	0.012294	246
BMgn008574	0.0065354	0.01233	247
BMgn017400	0.0065608	0.017929	248
BMgn002820	0.0066118	0.018057	249
BMgn003603	0.0066154	0.018064	250
BMgn004250	0.0066418	0.012534	251
BMgn011515	0.0066602	0.018187	252
BMgn014506	0.0066969	0.018277	253
BMgn008868	0.0067423	0.018393	254
BMgn006539	0.0067576	0.018431	255
BMgn004271	0.006815	0.018592	256
BMgn010889	0.0068157	0.027788	257
BMgn013209	0.0068497	0.018685	258
BMgn014859	0.0068558	0.018699	259
BMgn004651	0.006862	0.012942	260
BMgn016995	0.0068836	0.018782	261
BMgn003189	0.0068898	0.0188	262
BMgn015670	0.0069166	0.023636	263
BMgn008987	0.0069566	0.018978	264
BMgn007337	0.0069935	0.019073	265
BMgn015796	0.0070255	0.019149	266
BMgn010319	0.0070841	0.01332	267
BMgn012599	0.0070896	0.019307	268
BMgn003921	0.0071109	0.0070715	269
BMgn014781	0.0071152	0.028924	270
BMgn008036	0.0071409	0.01342	271
BMgn001616	0.0071434	0.013423	272
BMgn006231	0.0071541	0.019476	273
BMgn008022	0.0071754	0.019536	274
BMgn002509	0.0071964	0.0071464	275
BMgn002192	0.0072075	0.01963	276
BMgn001121	0.0072195	0.02462	277
BMgn000380	0.0073112	0.013713	278
BMgn014921	0.0073227	0.019903	279
BMgn016903	0.0073329	0.024981	280
BMgn007325	0.007368	0.01382	281
BMgn006307	0.0074255	0.013929	282
BMgn010372	0.007459	0.030159	283
BMgn010189	0.0074611	0.025407	284
BMgn016426	0.0074721	0.020292	285
BMgn011074	0.0074969	0.020368	286
BMgn006830	0.0075099	0.0074597	287
BMgn003275	0.0075382	0.020476	288
BMgn013391	0.0075669	0.0075064	289
BMgn008739	0.0075786	0.014219	290
BMgn005575	0.0076774	0.026108	291
BMgn008449	0.0076848	0.020856	292
BMgn003631	0.0076848	0.020856	293
BMgn015803	0.0076848	0.020856	294
BMgn005365	0.0076848	0.020856	295
BMgn017273	0.0077046	0.02091	296
BMgn001690	0.0077087	0.014455	297
BMgn011674	0.007744	0.026336	298
BMgn010140	0.007744	0.026336	299
BMgn000274	0.0077655	0.014564	300
BMgn011636	0.0077722	0.031315	301
BMgn010339	0.0078223	0.01467	302
BMgn000533	0.0078412	0.026659	303
BMgn016654	0.0078881	0.021389	304
BMgn013401	0.0078997	0.026845	305
BMgn013882	0.0079237	0.026926	306
BMgn006024	0.0079576	0.036536	307
BMgn002519	0.0079926	0.01497	308
BMgn015940	0.0079935	0.01497	309
BMgn017073	0.0079935	0.01497	310
BMgn016277	0.0079935	0.01497	311
BMgn017521	0.0079935	0.01497	312
BMgn000784	0.0080494	0.015068	313
BMgn014106	0.0080582	0.021879	314
BMgn000769	0.0081137	0.022017	315
BMgn009131	0.0081432	0.022103	316
BMgn010366	0.0081541	0.022136	317
BMgn000561	0.0081785	0.027725	318
BMgn009616	0.0082581	0.015452	319
BMgn004437	0.0082765	0.015491	320
BMgn006433	0.0083332	0.01561	321
BMgn005183	0.008379	0.022728	322
BMgn013966	0.008409	0.015751	323
BMgn001239	0.0086247	0.016174	324
BMgn002270	0.0086463	0.023406	325
BMgn008441	0.0086499	0.0086112	326
BMgn006880	0.0086514	0.034675	327
BMgn007223	0.0086533	0.023426	328
BMgn003161	0.0086618	0.016242	329
BMgn007929	0.0087338	0.029512	330
BMgn014132	0.0087461	0.029555	331
BMgn010346	0.0087948	0.023775	332
BMgn005116	0.0088234	0.023847	333
BMgn004065	0.008827	0.016566	334
BMgn006733	0.0088645	0.016631	335
BMgn003345	0.0089008	0.016705	336
BMgn003499	0.0089452	0.016787	337
BMgn000970	0.0089634	0.0089193	338
BMgn010755	0.0091278	0.017112	339
BMgn010156	0.0091497	0.04142	340
BMgn016399	0.0092483	0.02497	341
BMgn012538	0.0093633	0.031512	342
BMgn011158	0.0093721	0.031539	343
BMgn014276	0.0093767	0.0093266	344
BMgn017245	0.0093874	0.031592	345
BMgn013548	0.009425	0.025425	346
BMgn010349	0.009425	0.025425	347
BMgn013291	0.009425	0.025425	348
BMgn010829	0.009425	0.025425	349
BMgn015512	0.009425	0.025425	350
BMgn014940	0.0094342	0.017671	351
BMgn000557	0.009483	0.025566	352
BMgn015077	0.009484	0.031887	353
BMgn007813	0.0095361	0.032048	354
BMgn011990	0.0095571	0.025746	355
BMgn016896	0.0096384	0.018054	356
BMgn006664	0.0096549	0.032417	357
BMgn011780	0.0096738	0.018128	358
BMgn016639	0.0096759	0.0096373	359
BMgn012282	0.0096936	0.032538	360
BMgn015563	0.0097116	0.038455	361
BMgn002973	0.0097518	0.018299	362
BMgn004668	0.0097528	0.026257	363
BMgn016034	0.0098085	0.018397	364
BMgn001724	0.0098373	0.026477	365
BMgn007592	0.009843	0.02649	366
BMgn015055	0.0098863	0.026593	367
BMgn008098	0.009938	0.033287	368
BMgn001389	0.010051	0.033639	369
BMgn006408	0.010075	0.010031	370
BMgn006292	0.010092	0.018933	371
BMgn004451	0.010164	0.033999	372
BMgn017216	0.010173	0.027318	373
BMgn000899	0.010206	0.019157	374
BMgn005162	0.010274	0.010232	375
BMgn015163	0.010311	0.034438	376
BMgn008682	0.010346	0.027755	377
BMgn009206	0.010353	0.027769	378
BMgn000139	0.010395	0.027893	379
BMgn017581	0.010425	0.034778	380
BMgn014460	0.010445	0.010402	381
BMgn009571	0.010486	0.041271	382
BMgn005698	0.010487	0.028089	383
BMgn002324	0.010489	0.019687	384
BMgn009668	0.010559	0.010512	385
BMgn003451	0.010559	0.010512	386
BMgn004591	0.0106	0.02838	387
BMgn004616	0.010617	0.035369	388
BMgn012015	0.010659	0.020012	389
BMgn008748	0.010673	0.010632	390
BMgn013319	0.010701	0.028652	391
BMgn003507	0.01073	0.010679	392
BMgn000455	0.010759	0.01071	393
BMgn000172	0.010765	0.020232	394
BMgn001861	0.010765	0.020232	395
BMgn014079	0.010765	0.020232	396
BMgn009662	0.010765	0.020232	397
BMgn001220	0.010765	0.020232	398
BMgn004723	0.010765	0.020232	399
BMgn000587	0.010765	0.020232	400
BMgn015568	0.010765	0.020232	401
BMgn014519	0.010765	0.020232	402
BMgn011426	0.010765	0.020232	403
BMgn013873	0.010765	0.020232	404
BMgn013631	0.010777	0.028844	405
BMgn008370	0.010833	0.02899	406
BMgn004344	0.010862	0.029064	407
BMgn004383	0.010873	0.01082	408
BMgn013642	0.010894	0.036213	409
BMgn017017	0.010999	0.020646	410
BMgn008007	0.011096	0.043467	411
BMgn009044	0.011169	0.020975	412
BMgn005037	0.011229	0.011176	413
BMgn002505	0.011286	0.030115	414
BMgn013772	0.011304	0.030162	415
BMgn009126	0.011304	0.030162	416
BMgn001292	0.011304	0.030162	417
BMgn009979	0.011386	0.011323	418
BMgn014769	0.011443	0.011381	419
BMgn011307	0.011509	0.02162	420
BMgn007427	0.011623	0.021854	421
BMgn003589	0.011651	0.031008	422
BMgn009617	0.011679	0.038616	423
BMgn011180	0.011718	0.038734	424
BMgn003585	0.011718	0.038734	425
BMgn013989	0.011718	0.038734	426
BMgn009528	0.011736	0.022073	427
BMgn015499	0.01185	0.031503	428
BMgn016256	0.011878	0.031582	429
BMgn008758	0.01188	0.031589	430
BMgn008894	0.011881	0.022342	431
BMgn004752	0.011917	0.031679	432
BMgn011496	0.011927	0.011864	433
BMgn003090	0.012012	0.031918	434
BMgn001582	0.012043	0.031989	435
BMgn014995	0.012087	0.022728	436
BMgn016800	0.012101	0.032145	437
BMgn000225	0.012135	0.032223	438
BMgn008927	0.012169	0.032295	439
BMgn010797	0.012189	0.02293	440
BMgn009947	0.012195	0.047448	441
BMgn011986	0.012197	0.032368	442
BMgn006156	0.012249	0.03249	443
BMgn001272	0.01226	0.032506	444
BMgn006224	0.012333	0.032682	445
BMgn001867	0.012388	0.023276	446
BMgn002294	0.012425	0.040896	447
BMgn014655	0.012427	0.032923	448
BMgn001914	0.012438	0.032952	449
BMgn008648	0.012438	0.04094	450
BMgn002064	0.01251	0.041162	451
BMgn008450	0.012538	0.041242	452
BMgn007110	0.012559	0.033248	453
BMgn000768	0.012592	0.041411	454
BMgn006540	0.012643	0.023749	455
BMgn002928	0.012643	0.033451	456
BMgn009284	0.012799	0.02405	457
BMgn011863	0.012812	0.024071	458
BMgn006368	0.012818	0.033918	459
BMgn009680	0.012862	0.034029	460
BMgn002219	0.012869	0.024167	461
BMgn009027	0.012898	0.034111	462
BMgn002903	0.012925	0.042414	463
BMgn007571	0.012958	0.050176	464
BMgn000358	0.012982	0.012908	465
BMgn009265	0.012982	0.024365	466
BMgn014556	0.012982	0.034328	467
BMgn005320	0.013039	0.024454	468
BMgn016242	0.013084	0.024538	469
BMgn001847	0.013096	0.024555	470
BMgn012066	0.01311	0.034611	471
BMgn017530	0.013141	0.034685	472
BMgn008607	0.013241	0.024805	473
BMgn000812	0.013265	0.024853	474
BMgn012687	0.013296	0.013207	475
BMgn001663	0.013324	0.013228	476
BMgn000450	0.013328	0.043667	477
BMgn014145	0.013347	0.024992	478
BMgn002381	0.013379	0.025051	479
BMgn016617	0.013406	0.035338	480
BMgn011042	0.013438	0.013339	481
BMgn003980	0.013493	0.044158	482
BMgn007309	0.013563	0.035688	483
BMgn008330	0.013563	0.035688	484
BMgn006336	0.013627	0.044574	485
BMgn009815	0.013667	0.044697	486
BMgn011846	0.013745	0.036151	487
BMgn011591	0.013775	0.025764	488
BMgn009115	0.013775	0.025764	489
BMgn005208	0.013808	0.036314	490
BMgn013176	0.013819	0.036346	491
BMgn006709	0.01383	0.036374	492
BMgn005107	0.013888	0.025956	493
BMgn005681	0.013945	0.026055	494
BMgn003940	0.014001	0.02616	495
BMgn016750	0.014041	0.036901	496
BMgn014710	0.014063	0.036953	497
BMgn015774	0.014084	0.037	498
BMgn006029	0.014122	0.014009	499
BMgn009234	0.014152	0.037179	500
BMgn000740	0.014169	0.037216	501
BMgn015313	0.0142	0.037297	502
BMgn001374	0.014253	0.037439	503
BMgn008993	0.014286	0.05489	504
BMgn004823	0.014305	0.04668	505
BMgn008559	0.014305	0.04668	506
BMgn013095	0.014371	0.037727	507
BMgn010684	0.014376	0.02686	508
BMgn011138	0.014376	0.02686	509
BMgn017543	0.014376	0.02686	510
BMgn016245	0.014376	0.02686	511
BMgn011201	0.014376	0.02686	512
BMgn013449	0.014376	0.02686	513
BMgn010969	0.014376	0.02686	514
BMgn006867	0.014376	0.02686	515
BMgn007249	0.014376	0.02686	516
BMgn013523	0.014376	0.02686	517
BMgn011511	0.014376	0.02686	518
BMgn012287	0.014376	0.02686	519
BMgn009140	0.014376	0.02686	520
BMgn011872	0.014488	0.047264	521
BMgn009143	0.014695	0.056324	522
BMgn004739	0.014778	0.014679	523
BMgn008245	0.014805	0.038787	524
BMgn014860	0.014806	0.014717	525
BMgn005747	0.01481	0.038796	526
BMgn006312	0.014846	0.038899	527
BMgn016656	0.01485	0.027699	528
BMgn017210	0.014856	0.03892	529
BMgn001987	0.014892	0.014811	530
BMgn008691	0.014914	0.048558	531
BMgn012984	0.014931	0.0391	532
BMgn009155	0.01498	0.039221	533
BMgn003446	0.015006	0.014922	534
BMgn004329	0.015095	0.039535	535
BMgn009606	0.015105	0.04913	536
BMgn009771	0.015114	0.049164	537
BMgn017158	0.015133	0.028217	538
BMgn004628	0.015153	0.039677	539
BMgn004852	0.01519	0.028322	540
BMgn017106	0.015203	0.049434	541
BMgn007544	0.015245	0.049566	542
BMgn001599	0.015354	0.040168	543
BMgn000824	0.015421	0.050127	544
BMgn009068	0.015438	0.040367	545
BMgn006613	0.015472	0.058983	546
BMgn013308	0.015473	0.028854	547
BMgn000278	0.01549	0.040481	548
BMgn003323	0.015586	0.029066	549
BMgn014352	0.015642	0.029176	550
BMgn000948	0.015699	0.02928	551
BMgn005702	0.015701	0.029282	552
BMgn009318	0.01572	0.041053	553
BMgn011623	0.01572	0.041053	554
BMgn005172	0.01572	0.041053	555
BMgn004464	0.01572	0.041053	556
BMgn014792	0.015723	0.059837	557
BMgn003485	0.015737	0.029345	558
BMgn015145	0.015807	0.051305	559
BMgn013760	0.015946	0.015879	560
BMgn010680	0.016095	0.029962	561
BMgn006209	0.016115	0.042044	562
BMgn002817	0.016151	0.030073	563
BMgn011826	0.016156	0.069111	564
BMgn004182	0.0162	0.042253	565
BMgn002053	0.016203	0.016123	566
BMgn012098	0.016208	0.030169	567
BMgn015267	0.016259	0.052718	568
BMgn014950	0.016369	0.042708	569
BMgn014642	0.016372	0.053044	570
BMgn007589	0.016374	0.016307	571
BMgn015452	0.016377	0.03047	572
BMgn004114	0.016422	0.042848	573
BMgn007605	0.016459	0.016403	574
BMgn006251	0.016485	0.042996	575
BMgn005709	0.016573	0.016531	576
BMgn017083	0.016599	0.030856	577
BMgn002888	0.016603	0.030867	578
BMgn012164	0.01668	0.030982	579
BMgn006512	0.016707	0.054027	580
BMgn009645	0.016708	0.054028	581
BMgn015853	0.016773	0.031144	582
BMgn017599	0.016789	0.054268	583
BMgn000854	0.016829	0.031259	584
BMgn010099	0.016938	0.031443	585
BMgn006624	0.016943	0.05474	586
BMgn012916	0.016961	0.044133	587
BMgn011704	0.016999	0.031552	588
BMgn001567	0.017018	0.04426	589
BMgn007482	0.017054	0.044338	590
BMgn001273	0.017056	0.031658	591
BMgn003358	0.0171	0.017074	592
BMgn014122	0.017102	0.031745	593
BMgn008373	0.017112	0.03176	594
BMgn005710	0.017169	0.031872	595
BMgn003622	0.017171	0.055411	596
BMgn001891	0.017192	0.031916	597
BMgn015166	0.0172	0.017181	598
BMgn017274	0.017221	0.06504	599
BMgn008232	0.017227	0.065058	600
BMgn005322	0.017287	0.044921	601
BMgn016808	0.017303	0.055808	602
BMgn007154	0.017303	0.055808	603
BMgn010790	0.017323	0.065387	604
BMgn000020	0.017338	0.032195	605
BMgn012387	0.017423	0.045272	606
BMgn005591	0.017443	0.065798	607
BMgn013466	0.017468	0.045368	608
BMgn008289	0.017559	0.045584	609
BMgn013601	0.01761	0.056721	610
BMgn013505	0.017635	0.032711	611
BMgn011593	0.017645	0.045816	612
BMgn006556	0.017677	0.032795	613
BMgn014285	0.017685	0.017665	614
BMgn010998	0.017721	0.046032	615
BMgn006826	0.017829	0.057363	616
BMgn004618	0.017884	0.057525	617
BMgn009400	0.017901	0.057573	618
BMgn009306	0.017907	0.046474	619
BMgn015419	0.017914	0.05761	620
BMgn001751	0.01795	0.057714	621
BMgn015069	0.017995	0.04667	622
BMgn015394	0.017995	0.04667	623
BMgn006708	0.017995	0.04667	624
BMgn004987	0.017995	0.04667	625
BMgn012323	0.018007	0.046708	626
BMgn002140	0.018016	0.033399	627
BMgn011136	0.018026	0.057945	628
BMgn009903	0.018059	0.046832	629
BMgn001331	0.018072	0.033489	630
BMgn016235	0.018106	0.058168	631
BMgn015892	0.018141	0.018103	632
BMgn006908	0.018226	0.018193	633
BMgn009610	0.018296	0.077272	634
BMgn016112	0.018313	0.047441	635
BMgn001650	0.01834	0.018298	636
BMgn012127	0.018524	0.047941	637
BMgn015150	0.018677	0.048303	638
BMgn008568	0.018774	0.034748	639
BMgn002530	0.018774	0.034748	640
BMgn002005	0.018774	0.034748	641
BMgn007930	0.018774	0.034748	642
BMgn014988	0.018774	0.034748	643
BMgn005759	0.018774	0.034748	644
BMgn001201	0.018774	0.034748	645
BMgn007299	0.018811	0.048638	646
BMgn000870	0.018853	0.018845	647
BMgn001320	0.01888	0.070685	648
BMgn001091	0.018882	0.018875	649
BMgn002848	0.01892	0.035008	650
BMgn016463	0.018948	0.060623	651
BMgn001271	0.019053	0.019049	652
BMgn005148	0.019071	0.061037	653
BMgn003581	0.019089	0.035296	654
BMgn016509	0.01909	0.061093	655
BMgn010048	0.019122	0.071486	656
BMgn005445	0.019145	0.035394	657
BMgn003537	0.019167	0.01917	658
BMgn000590	0.019167	0.061306	659
BMgn016280	0.019182	0.049512	660
BMgn000710	0.019202	0.03551	661
BMgn016404	0.019326	0.049868	662
BMgn014667	0.019338	0.019356	663
BMgn000835	0.019366	0.019391	664
BMgn010843	0.019371	0.035791	665
BMgn013455	0.019423	0.019442	666
BMgn012951	0.019466	0.050204	667
BMgn003487	0.019625	0.062664	668
BMgn006293	0.019633	0.062688	669
BMgn006369	0.01971	0.036404	670
BMgn013516	0.019736	0.050855	671
BMgn014110	0.01978	0.063095	672
BMgn002672	0.019823	0.036618	673
BMgn011844	0.019865	0.063342	674
BMgn003208	0.019916	0.051308	675
BMgn002131	0.019998	0.063726	676
BMgn005838	0.020085	0.051737	677
BMgn007970	0.020161	0.037226	678
BMgn004750	0.020181	0.037264	679
BMgn003532	0.020199	0.064316	680
BMgn014432	0.020238	0.037368	681
BMgn006083	0.02025	0.020263	682
BMgn005360	0.020254	0.052195	683
BMgn014242	0.020278	0.020294	684
BMgn014699	0.020387	0.037644	685
BMgn011896	0.020392	0.020401	686
BMgn011036	0.020392	0.037654	687
BMgn015920	0.0205	0.037836	688
BMgn000830	0.020524	0.052874	689
BMgn010065	0.020524	0.052874	690
BMgn017018	0.020556	0.037947	691
BMgn010379	0.02059	0.076373	692
BMgn013666	0.020683	0.065727	693
BMgn001802	0.020683	0.065727	694
BMgn016297	0.020725	0.038264	695
BMgn012257	0.020726	0.076844	696
BMgn004488	0.020734	0.020712	697
BMgn006800	0.020801	0.038402	698
BMgn003727	0.021007	0.038771	699
BMgn015509	0.021048	0.021008	700
BMgn002353	0.02109	0.03893	701
BMgn009732	0.021105	0.054333	702
BMgn004378	0.021108	0.078088	703
BMgn012147	0.021148	0.039026	704
BMgn009603	0.021213	0.054607	705
BMgn014960	0.02122	0.067268	706
BMgn013517	0.021267	0.054742	707
BMgn012014	0.021276	0.067421	708
BMgn012485	0.021431	0.039517	709
BMgn012967	0.021437	0.079173	710
BMgn011687	0.021504	0.021452	711
BMgn005121	0.021515	0.039667	712
BMgn001144	0.021518	0.055335	713
BMgn010128	0.021532	0.079517	714
BMgn012443	0.02154	0.039713	715
BMgn004219	0.02154	0.055378	716
BMgn010928	0.02156	0.06826	717
BMgn005809	0.021571	0.039767	718
BMgn001466	0.021589	0.021542	719
BMgn013378	0.021603	0.055535	720
BMgn015742	0.021613	0.055551	721
BMgn010866	0.021619	0.089663	722
BMgn009643	0.02164	0.039911	723
BMgn014881	0.021653	0.068508	724
BMgn008442	0.021689	0.055751	725
BMgn017103	0.021703	0.055786	726
BMgn015653	0.021785	0.055987	727
BMgn009786	0.021786	0.068939	728
BMgn002763	0.021789	0.021758	729
BMgn010820	0.021908	0.056296	730
BMgn017179	0.021942	0.08085	731
BMgn003527	0.021975	0.080965	732
BMgn005194	0.022024	0.05657	733
BMgn012992	0.022108	0.056749	734
BMgn016956	0.022134	0.056816	735
BMgn003297	0.022326	0.070458	736
BMgn006656	0.022332	0.041178	737
BMgn012699	0.022332	0.041178	738
BMgn010050	0.022346	0.070519	739
BMgn012683	0.022384	0.082296	740
BMgn010902	0.022445	0.057552	741
BMgn015898	0.022551	0.057805	742
BMgn015789	0.022551	0.057805	743
BMgn015122	0.022551	0.057805	744
BMgn014173	0.022551	0.057805	745
BMgn013023	0.022566	0.07114	746
BMgn010638	0.022699	0.041846	747
BMgn005150	0.022843	0.022804	748
BMgn008523	0.022866	0.058613	749
BMgn015076	0.022868	0.042148	750
BMgn001419	0.022872	0.022834	751
BMgn011718	0.022963	0.072263	752
BMgn016041	0.023035	0.058987	753
BMgn016704	0.023093	0.042563	754
BMgn012489	0.023223	0.085037	755
BMgn011361	0.023316	0.059681	756
BMgn017192	0.023384	0.043082	757
BMgn003473	0.023384	0.043082	758
BMgn004115	0.023384	0.043082	759
BMgn013706	0.023384	0.043082	760
BMgn011697	0.023384	0.043082	761
BMgn015623	0.023384	0.043082	762
BMgn008353	0.023384	0.043082	763
BMgn014930	0.023384	0.043082	764
BMgn010567	0.023384	0.043082	765
BMgn017299	0.023384	0.043082	766
BMgn001475	0.023385	0.023344	767
BMgn008752	0.023431	0.043163	768
BMgn008196	0.023446	0.0737	769
BMgn017040	0.023457	0.059999	770
BMgn005675	0.02347	0.023426	771
BMgn014406	0.023471	0.07376	772
BMgn003267	0.023527	0.023476	773
BMgn001024	0.02354	0.060179	774
BMgn008660	0.023613	0.023558	775
BMgn007331	0.023624	0.060371	776
BMgn016796	0.02367	0.074368	777
BMgn014737	0.023769	0.043793	778
BMgn009236	0.023782	0.074686	779
BMgn015344	0.023792	0.060757	780
BMgn013719	0.023885	0.06099	781
BMgn013687	0.023928	0.061089	782
BMgn006601	0.02396	0.061171	783
BMgn015315	0.023962	0.061181	784
BMgn016254	0.024051	0.044277	785
BMgn016636	0.024083	0.061439	786
BMgn013652	0.024107	0.075613	787
BMgn000867	0.024154	0.024067	788
BMgn000763	0.024165	0.075766	789
BMgn007881	0.02422	0.044578	790
BMgn009399	0.024222	0.061764	791
BMgn006794	0.024276	0.044662	792
BMgn012902	0.024303	0.076162	793
BMgn002911	0.024388	0.044846	794
BMgn002506	0.024397	0.024297	795
BMgn011807	0.024445	0.044962	796
BMgn003559	0.024496	0.045057	797
BMgn017178	0.024501	0.045065	798
BMgn010841	0.024505	0.045071	799
BMgn012040	0.024519	0.076755	800
BMgn001416	0.024531	0.045113	801
BMgn005726	0.024716	0.062955	802
BMgn009776	0.024797	0.077577	803
BMgn005490	0.024863	0.045655	804
BMgn006221	0.024885	0.063357	805
BMgn014293	0.024902	0.077889	806
BMgn013644	0.025002	0.078159	807
BMgn014444	0.025034	0.045977	808
BMgn003644	0.025066	0.024998	809
BMgn012172	0.025123	0.025049	810
BMgn017506	0.025169	0.091251	811
BMgn011331	0.025177	0.046221	812
BMgn004944	0.025232	0.064209	813
BMgn010457	0.025237	0.025158	814
BMgn014117	0.025289	0.046409	815
BMgn003355	0.025323	0.025242	816
BMgn016758	0.025344	0.091812	817
BMgn004841	0.025349	0.079171	818
BMgn006422	0.02536	0.064508	819
BMgn003047	0.025373	0.091915	820
BMgn003799	0.025401	0.079304	821
BMgn007596	0.02546	0.046727	822
BMgn007025	0.02557	0.065024	823
BMgn016335	0.025638	0.092792	824
BMgn005079	0.025642	0.065176	825
BMgn014917	0.025659	0.065209	826
BMgn011808	0.025665	0.025594	827
BMgn011223	0.025777	0.065482	828
BMgn000049	0.025779	0.025704	829
BMgn004681	0.025812	0.080394	830
BMgn004430	0.025851	0.065659	831
BMgn013185	0.025852	0.047426	832
BMgn008261	0.025852	0.047427	833
BMgn002526	0.025955	0.065884	834
BMgn016318	0.025978	0.065945	835
BMgn010424	0.026007	0.025931	836
BMgn013888	0.026062	0.066123	837
BMgn012202	0.02609	0.081158	838
BMgn012336	0.02609	0.081158	839
BMgn006442	0.026105	0.066245	840
BMgn016161	0.026105	0.066245	841
BMgn010682	0.026105	0.066245	842
BMgn004525	0.026131	0.081271	843
BMgn009892	0.026134	0.066307	844
BMgn012002	0.026156	0.094452	845
BMgn015139	0.026189	0.047981	846
BMgn007871	0.02619	0.081443	847
BMgn016537	0.02619	0.081443	848
BMgn017062	0.026193	0.066435	849
BMgn010515	0.026239	0.048072	850
BMgn014923	0.026271	0.09481	851
BMgn007797	0.026296	0.094894	852
BMgn017114	0.026302	0.048195	853
BMgn007890	0.026349	0.026296	854
BMgn005198	0.026433	0.048412	855
BMgn004520	0.026582	0.082537	856
BMgn014632	0.026656	0.048833	857
BMgn016127	0.026752	0.049009	858
BMgn015925	0.026814	0.049128	859
BMgn010869	0.026818	0.067906	860
BMgn017037	0.026824	0.067928	861
BMgn003147	0.026861	0.049207	862
BMgn000920	0.026919	0.026867	863
BMgn009053	0.026949	0.04936	864
BMgn006045	0.026949	0.04936	865
BMgn009499	0.027025	0.083796	866
BMgn008940	0.027034	0.068411	867
BMgn001711	0.027039	0.049507	868
BMgn000429	0.027049	0.068442	869
BMgn007884	0.027067	0.097409	870
BMgn012444	0.027089	0.049585	871
BMgn000749	0.02709	0.027042	872
BMgn006911	0.027126	0.068604	873
BMgn011276	0.027165	0.049712	874
BMgn004400	0.027258	0.049886	875
BMgn013583	0.027314	0.049995	876
BMgn007460	0.02737	0.0501	877
BMgn007598	0.027406	0.069261	878
BMgn009701	0.027445	0.084983	879
BMgn013103	0.027483	0.050286	880
BMgn014317	0.02749	0.069468	881
BMgn000684	0.027573	0.069653	882
BMgn012431	0.027644	0.069831	883
BMgn003378	0.027651	0.050557	884
BMgn005947	0.02769	0.069933	885
BMgn005265	0.027772	0.070126	886
BMgn009501	0.027781	0.085948	887
BMgn010815	0.027782	0.070146	888
BMgn011931	0.027785	0.085959	889
BMgn014274	0.027797	0.070181	890
BMgn013476	0.02781	0.099785	891
BMgn010918	0.027811	0.070217	892
BMgn006238	0.027838	0.08612	893
BMgn017561	0.027888	0.027825	894
BMgn012307	0.027888	0.027825	895
BMgn016485	0.027903	0.10009	896
BMgn004319	0.027918	0.086354	897
BMgn001139	0.027918	0.086354	898
BMgn015572	0.027941	0.112	899
BMgn008522	0.02803	0.027972	900
BMgn002312	0.028034	0.086664	901
BMgn016807	0.028059	0.10057	902
BMgn012209	0.028059	0.10057	903
BMgn015561	0.028059	0.10057	904
BMgn015698	0.028087	0.028038	905
BMgn012864	0.028103	0.070896	906
BMgn009597	0.028253	0.087233	907
BMgn014244	0.028277	0.071303	908
BMgn002138	0.028412	0.071629	909
BMgn017049	0.028438	0.051911	910
BMgn003669	0.028477	0.051989	911
BMgn001990	0.028477	0.051989	912
BMgn014711	0.028477	0.051989	913
BMgn016143	0.028477	0.051989	914
BMgn009837	0.028477	0.051989	915
BMgn000331	0.028477	0.051989	916
BMgn014388	0.028477	0.051989	917
BMgn001611	0.028477	0.051989	918
BMgn006495	0.028477	0.051989	919
BMgn000456	0.028477	0.051989	920
BMgn006604	0.028477	0.051989	921
BMgn004368	0.028477	0.051989	922
BMgn000716	0.028477	0.051989	923
BMgn015957	0.028477	0.051989	924
BMgn007366	0.028486	0.028426	925
BMgn002202	0.028494	0.052019	926
BMgn016887	0.028607	0.052214	927
BMgn002307	0.028657	0.028579	928
BMgn014456	0.028665	0.1025	929
BMgn009481	0.028714	0.028623	930
BMgn007127	0.028743	0.028648	931
BMgn008044	0.028832	0.072619	932
BMgn011767	0.028867	0.088913	933
BMgn001393	0.028867	0.088913	934
BMgn007056	0.028887	0.052713	935
BMgn000594	0.028906	0.08902	936
BMgn000043	0.029113	0.029066	937
BMgn008201	0.029146	0.089685	938
BMgn000258	0.029248	0.073576	939
BMgn006402	0.029248	0.073576	940
BMgn014265	0.029248	0.073576	941
BMgn015081	0.029335	0.073782	942
BMgn007900	0.029427	0.029378	943
BMgn016252	0.029455	0.029404	944
BMgn009572	0.029502	0.074152	945
BMgn014102	0.029541	0.02949	946
BMgn012005	0.029569	0.029514	947
BMgn005014	0.029618	0.054029	948
BMgn012712	0.02967	0.074536	949
BMgn007242	0.029673	0.091129	950
BMgn001276	0.029673	0.091129	951
BMgn012154	0.029673	0.091129	952
BMgn015793	0.029673	0.091129	953
BMgn015040	0.029683	0.029632	954
BMgn005555	0.02973	0.054216	955
BMgn010914	0.029838	0.07491	956
BMgn004403	0.029954	0.054582	957
BMgn014286	0.029968	0.075188	958
BMgn002181	0.030062	0.075404	959
BMgn014118	0.030062	0.075404	960
BMgn006698	0.030062	0.075404	961
BMgn008726	0.030062	0.075404	962
BMgn002945	0.030062	0.075404	963
BMgn016554	0.030062	0.075404	964
BMgn012378	0.030067	0.054775	965
BMgn000629	0.030111	0.05485	966
BMgn014514	0.030213	0.1073	967
BMgn011209	0.030216	0.075771	968
BMgn006032	0.03023	0.055034	969
BMgn006280	0.030272	0.092765	970
BMgn010391	0.030305	0.092863	971
BMgn010465	0.030347	0.055234	972
BMgn016130	0.030469	0.093307	973
BMgn013547	0.030488	0.055485	974
BMgn000642	0.030572	0.055629	975
BMgn010905	0.030598	0.055665	976
BMgn006670	0.030613	0.093677	977
BMgn001900	0.030628	0.055716	978
BMgn007295	0.030671	0.10874	979
BMgn003148	0.030675	0.076809	980
BMgn013105	0.0307	0.076862	981
BMgn014782	0.030705	0.093945	982
BMgn002450	0.030852	0.056129	983
BMgn009095	0.030888	0.056184	984
BMgn013057	0.030889	0.094441	985
BMgn015817	0.030909	0.030818	986
BMgn007234	0.030928	0.12221	987
BMgn001467	0.031077	0.056503	988
BMgn005803	0.031094	0.077759	989
BMgn008998	0.031189	0.056693	990
BMgn011602	0.031222	0.031142	991
BMgn003308	0.031245	0.056787	992
BMgn017297	0.03133	0.056939	993
BMgn012913	0.031431	0.057127	994
BMgn002233	0.031441	0.057151	995
BMgn016532	0.031451	0.057167	996
BMgn000215	0.031479	0.031395	997
BMgn010386	0.031485	0.09613	998
BMgn009288	0.031526	0.057302	999
BMgn015415	0.031554	0.078813	1000
BMgn010649	0.031674	0.057564	1001
BMgn002705	0.031693	0.031624	1002
BMgn013114	0.031715	0.057634	1003
BMgn010396	0.031727	0.096741	1004
BMgn007951	0.031727	0.096741	1005
BMgn014548	0.031727	0.096741	1006
BMgn011281	0.031727	0.096741	1007
BMgn001021	0.031745	0.057689	1008
BMgn003966	0.03175	0.057698	1009
BMgn010872	0.031888	0.097144	1010
BMgn010101	0.03189	0.057944	1011
BMgn007026	0.031906	0.031856	1012
BMgn012361	0.031911	0.097208	1013
BMgn013525	0.032015	0.079879	1014
BMgn002556	0.03203	0.05818	1015
BMgn011731	0.032039	0.097571	1016
BMgn016779	0.032044	0.079947	1017
BMgn001367	0.032044	0.079947	1018
BMgn008293	0.032044	0.079947	1019
BMgn010408	0.032044	0.079947	1020
BMgn007662	0.032044	0.079947	1021
BMgn007119	0.032044	0.079947	1022
BMgn003231	0.032087	0.058288	1023
BMgn001862	0.032107	0.11316	1024
BMgn014621	0.032122	0.05835	1025
BMgn014472	0.03216	0.097882	1026
BMgn008555	0.032311	0.058688	1027
BMgn012513	0.032423	0.058895	1028
BMgn012522	0.032429	0.098626	1029
BMgn004179	0.032433	0.080838	1030
BMgn012106	0.03264	0.11483	1031
BMgn008394	0.032653	0.099238	1032
BMgn014175	0.032684	0.081415	1033
BMgn009918	0.032733	0.032701	1034
BMgn016145	0.032851	0.081783	1035
BMgn010824	0.032935	0.081974	1036
BMgn007853	0.033018	0.082152	1037
BMgn006812	0.033096	0.060064	1038
BMgn000611	0.033102	0.082357	1039
BMgn002269	0.033103	0.033089	1040
BMgn011026	0.033149	0.12968	1041
BMgn004241	0.033152	0.06016	1042
BMgn013939	0.033178	0.082532	1043
BMgn001850	0.033189	0.033172	1044
BMgn012591	0.033311	0.082832	1045
BMgn013978	0.033331	0.033308	1046
BMgn009759	0.0334	0.11721	1047
BMgn014019	0.033443	0.10138	1048
BMgn013394	0.033443	0.10138	1049
BMgn008794	0.033443	0.10138	1050
BMgn008045	0.033445	0.033416	1051
BMgn016982	0.03352	0.083314	1052
BMgn009902	0.033553	0.083402	1053
BMgn012800	0.033568	0.060907	1054
BMgn011323	0.033568	0.060907	1055
BMgn005404	0.033568	0.060907	1056
BMgn005232	0.033568	0.060907	1057
BMgn000194	0.033568	0.060907	1058
BMgn006861	0.033568	0.060907	1059
BMgn003394	0.033568	0.060907	1060
BMgn015349	0.033568	0.060907	1061
BMgn002688	0.033568	0.060907	1062
BMgn016204	0.033568	0.060907	1063
BMgn014832	0.033598	0.10178	1064
BMgn007695	0.033603	0.083522	1065
BMgn004738	0.033645	0.03362	1066
BMgn008964	0.033656	0.061063	1067
BMgn006061	0.033712	0.061161	1068
BMgn008222	0.03372	0.083804	1069
BMgn009905	0.03372	0.083804	1070
BMgn010395	0.03372	0.083804	1071
BMgn003587	0.03373	0.033706	1072
BMgn010893	0.033752	0.10218	1073
BMgn012163	0.033759	0.033729	1074
BMgn015383	0.033805	0.11843	1075
BMgn013962	0.033816	0.03378	1076
BMgn000040	0.033824	0.061328	1077
BMgn015576	0.033859	0.033828	1078
BMgn000164	0.033878	0.11865	1079
BMgn016166	0.033901	0.033874	1080
BMgn013147	0.033908	0.061477	1081
BMgn012437	0.033939	0.084309	1082
BMgn012709	0.033958	0.03392	1083
BMgn005711	0.034001	0.11903	1084
BMgn002774	0.034072	0.034038	1085
BMgn002844	0.034144	0.10328	1086
BMgn011364	0.034216	0.062027	1087
BMgn016820	0.034276	0.08506	1088
BMgn004879	0.034328	0.062209	1089
BMgn013714	0.03436	0.085252	1090
BMgn013145	0.034443	0.034401	1091
BMgn005042	0.034494	0.10419	1092
BMgn015799	0.034496	0.062494	1093
BMgn014442	0.034552	0.12069	1094
BMgn010054	0.034552	0.062582	1095
BMgn013280	0.034585	0.034552	1096
BMgn004150	0.034602	0.10446	1097
BMgn015559	0.034689	0.085969	1098
BMgn008982	0.034711	0.086017	1099
BMgn007186	0.034818	0.086268	1100
BMgn010807	0.034832	0.063041	1101
BMgn001287	0.034833	0.063043	1102
BMgn007697	0.035003	0.063357	1103
BMgn012254	0.035023	0.08674	1104
BMgn009651	0.035056	0.086813	1105
BMgn002687	0.035107	0.086935	1106
BMgn007074	0.035183	0.10599	1107
BMgn007441	0.035224	0.063736	1108
BMgn000502	0.035241	0.035233	1109
BMgn000314	0.035264	0.10621	1110
BMgn005856	0.03528	0.063837	1111
BMgn008810	0.035335	0.063924	1112
BMgn005228	0.035378	0.064003	1113
BMgn014327	0.035433	0.087684	1114
BMgn013125	0.035497	0.035482	1115
BMgn001915	0.035526	0.035505	1116
BMgn012191	0.035528	0.064249	1117
BMgn013977	0.035574	0.12378	1118
BMgn011228	0.035615	0.088085	1119
BMgn010251	0.035615	0.088085	1120
BMgn007848	0.035615	0.088085	1121
BMgn003986	0.035615	0.088085	1122
BMgn015919	0.035615	0.088085	1123
BMgn012713	0.035615	0.088085	1124
BMgn011909	0.035616	0.10719	1125
BMgn005584	0.035616	0.064404	1126
BMgn016099	0.035691	0.088239	1127
BMgn004819	0.035775	0.088406	1128
BMgn013463	0.035839	0.035794	1129
BMgn017446	0.03584	0.064787	1130
BMgn014770	0.036008	0.065104	1131
BMgn008685	0.03604	0.10835	1132
BMgn014433	0.03606	0.12523	1133
BMgn000231	0.036078	0.06522	1134
BMgn013738	0.036133	0.12546	1135
BMgn012001	0.036262	0.10896	1136
BMgn003580	0.036347	0.089739	1137
BMgn013412	0.036438	0.036409	1138
BMgn004691	0.036458	0.065872	1139
BMgn010937	0.036556	0.066056	1140
BMgn007100	0.036568	0.066079	1141
BMgn007250	0.036609	0.090324	1142
BMgn016003	0.036624	0.066169	1143
BMgn016940	0.036654	0.06623	1144
BMgn004983	0.036713	0.12722	1145
BMgn008999	0.036713	0.12722	1146
BMgn008436	0.036734	0.090619	1147
BMgn003763	0.036736	0.066364	1148
BMgn002738	0.036851	0.12762	1149
BMgn013742	0.036859	0.090916	1150
BMgn016482	0.036861	0.11052	1151
BMgn009515	0.036884	0.066631	1152
BMgn015665	0.036917	0.066685	1153
BMgn001737	0.036959	0.066761	1154
BMgn005055	0.03698	0.036938	1155
BMgn017090	0.036983	0.11082	1156
BMgn005972	0.036993	0.066825	1157
BMgn009516	0.037026	0.14245	1158
BMgn009953	0.037037	0.066897	1159
BMgn005021	0.037152	0.1285	1160
BMgn017194	0.037159	0.091572	1161
BMgn010793	0.037193	0.091654	1162
BMgn006262	0.037276	0.091819	1163
BMgn000550	0.037293	0.037262	1164
BMgn017173	0.037322	0.037289	1165
BMgn013850	0.037463	0.067635	1166
BMgn010545	0.037474	0.092282	1167
BMgn004272	0.03751	0.067707	1168
BMgn007540	0.037605	0.11245	1169
BMgn004782	0.037605	0.11245	1170
BMgn001689	0.037605	0.11245	1171
BMgn009641	0.037605	0.11245	1172
BMgn006979	0.037632	0.06793	1173
BMgn005396	0.037654	0.067959	1174
BMgn008295	0.037798	0.068193	1175
BMgn013158	0.037835	0.037814	1176
BMgn002438	0.037892	0.037864	1177
BMgn003863	0.03792	0.03789	1178
BMgn011524	0.038022	0.068598	1179
BMgn007019	0.038026	0.09354	1180
BMgn009774	0.038038	0.1136	1181
BMgn009664	0.038237	0.11414	1182
BMgn002534	0.038245	0.069008	1183
BMgn002929	0.038333	0.094225	1184
BMgn011867	0.038333	0.094225	1185
BMgn008008	0.038333	0.094225	1186
BMgn016292	0.038333	0.094225	1187
BMgn013194	0.038402	0.11457	1188
BMgn001860	0.038413	0.069307	1189
BMgn011914	0.038444	0.11468	1190
BMgn014603	0.038478	0.11476	1191
BMgn010817	0.038581	0.069611	1192
BMgn016301	0.038609	0.094842	1193
BMgn005604	0.038612	0.11512	1194
BMgn007334	0.038682	0.11532	1195
BMgn013294	0.038693	0.095025	1196
BMgn005140	0.038699	0.11536	1197
BMgn009555	0.038712	0.1154	1198
BMgn005904	0.038775	0.038729	1199
BMgn012858	0.038859	0.095386	1200
BMgn009025	0.03886	0.070094	1201
BMgn000656	0.038918	0.038879	1202
BMgn001679	0.038942	0.070247	1203
BMgn007205	0.038942	0.070247	1204
BMgn009211	0.038942	0.070247	1205
BMgn005494	0.038942	0.070247	1206
BMgn010723	0.038942	0.070247	1207
BMgn005388	0.038942	0.070247	1208
BMgn008416	0.038942	0.070247	1209
BMgn008787	0.038942	0.070247	1210
BMgn001015	0.038942	0.070247	1211
BMgn016974	0.038942	0.070247	1212
BMgn001084	0.038942	0.070247	1213
BMgn005600	0.038942	0.070247	1214
BMgn013070	0.038942	0.070247	1215
BMgn004999	0.038942	0.070247	1216
BMgn014747	0.038942	0.070247	1217
BMgn017006	0.038942	0.070247	1218
BMgn010898	0.038942	0.070247	1219
BMgn011862	0.038942	0.095591	1220
BMgn006268	0.039029	0.134	1221
BMgn000894	0.039032	0.038988	1222
BMgn016046	0.039034	0.13402	1223
BMgn016702	0.039084	0.070518	1224
BMgn001837	0.039117	0.039066	1225
BMgn005836	0.039188	0.11666	1226
BMgn000435	0.039214	0.096204	1227
BMgn016109	0.039217	0.11674	1228
BMgn012261	0.039264	0.096324	1229
BMgn006605	0.039275	0.096352	1230
BMgn010410	0.039317	0.039278	1231
BMgn010164	0.039343	0.096498	1232
BMgn004973	0.039431	0.039389	1233
BMgn013337	0.039474	0.11739	1234
BMgn004337	0.039475	0.071169	1235
BMgn009592	0.039476	0.13534	1236
BMgn016499	0.039525	0.096906	1237
BMgn000468	0.039531	0.071271	1238
BMgn009154	0.039551	0.096957	1239
BMgn002827	0.039602	0.039535	1240
BMgn006734	0.039659	0.039592	1241
BMgn012265	0.039682	0.097266	1242
BMgn007335	0.039682	0.097266	1243
BMgn011622	0.039682	0.097266	1244
BMgn001644	0.039682	0.097266	1245
BMgn013028	0.039682	0.097266	1246
BMgn007210	0.039682	0.097266	1247
BMgn009463	0.039682	0.097266	1248
BMgn000833	0.039682	0.097266	1249
BMgn015483	0.039682	0.097266	1250
BMgn016756	0.039682	0.097266	1251
BMgn012293	0.039682	0.097266	1252
BMgn006741	0.039682	0.097266	1253
BMgn013633	0.039682	0.097266	1254
BMgn002594	0.039682	0.097266	1255
BMgn010487	0.039682	0.097266	1256
BMgn008639	0.039682	0.097266	1257
BMgn007664	0.039682	0.097266	1258
BMgn003034	0.039682	0.097266	1259
BMgn015011	0.039682	0.097266	1260
BMgn010467	0.03971	0.097339	1261
BMgn003089	0.039716	0.039646	1262
BMgn014180	0.039747	0.11815	1263
BMgn009805	0.039754	0.071682	1264
BMgn013107	0.039799	0.097532	1265
BMgn007041	0.039805	0.11828	1266
BMgn015226	0.039819	0.097573	1267
BMgn014345	0.03983	0.039766	1268
BMgn010040	0.039859	0.11843	1269
BMgn009835	0.03995	0.072026	1270
BMgn008744	0.040137	0.11921	1271
BMgn012924	0.040149	0.09834	1272
BMgn015591	0.040149	0.09834	1273
BMgn007601	0.040166	0.13738	1274
BMgn006025	0.040201	0.072471	1275
BMgn002741	0.040252	0.072548	1276
BMgn005890	0.040257	0.072555	1277
BMgn012939	0.040371	0.040314	1278
BMgn005339	0.040383	0.15321	1279
BMgn001006	0.040413	0.07282	1280
BMgn016816	0.040428	0.040372	1281
BMgn017451	0.040436	0.072866	1282
BMgn007660	0.040475	0.12008	1283
BMgn013379	0.04048	0.07293	1284
BMgn008611	0.040504	0.072966	1285
BMgn014105	0.040536	0.073017	1286
BMgn004994	0.040571	0.040515	1287
BMgn004294	0.040628	0.040556	1288
BMgn000089	0.040685	0.040615	1289
BMgn001949	0.040688	0.073283	1290
BMgn011523	0.040849	0.073566	1291
BMgn014304	0.040855	0.1394	1292
BMgn010694	0.040856	0.099902	1293
BMgn016135	0.040914	0.13958	1294
BMgn016030	0.040941	0.073721	1295
BMgn014740	0.040976	0.073785	1296
BMgn013934	0.041068	0.073937	1297
BMgn009913	0.041072	0.12167	1298
BMgn004912	0.041138	0.07405	1299
BMgn011852	0.04115	0.074069	1300
BMgn005592	0.041169	0.041096	1301
BMgn012725	0.041265	0.074257	1302
BMgn001881	0.041318	0.074336	1303
BMgn001045	0.041353	0.12241	1304
BMgn007769	0.041364	0.10105	1305
BMgn013389	0.041364	0.10105	1306
BMgn004610	0.041364	0.10105	1307
BMgn010972	0.041364	0.10105	1308
BMgn001887	0.041364	0.10105	1309
BMgn002632	0.041364	0.10105	1310
BMgn011729	0.041364	0.10105	1311
BMgn013509	0.041485	0.074627	1312
BMgn004970	0.041485	0.074627	1313
BMgn011451	0.041521	0.1014	1314
BMgn001206	0.041541	0.074726	1315
BMgn000779	0.041567	0.074776	1316
BMgn002148	0.041597	0.074819	1317
BMgn016151	0.041636	0.074889	1318
BMgn002794	0.041682	0.14186	1319
BMgn001978	0.041707	0.14193	1320
BMgn000494	0.041834	0.075207	1321
BMgn011801	0.041854	0.10213	1322
BMgn012638	0.041987	0.075481	1323
BMgn017122	0.04202	0.10251	1324
BMgn009113	0.042024	0.041976	1325
BMgn004387	0.042186	0.10287	1326
BMgn008834	0.042191	0.1246	1327
BMgn005132	0.042191	0.1246	1328
BMgn005832	0.042191	0.1246	1329
BMgn000333	0.042219	0.10294	1330
BMgn000989	0.042269	0.10304	1331
BMgn015695	0.042312	0.10312	1332
BMgn003046	0.042337	0.076095	1333
BMgn015316	0.042423	0.042387	1334
BMgn017535	0.042435	0.12524	1335
BMgn016446	0.042435	0.12524	1336
BMgn011589	0.04244	0.10342	1337
BMgn012427	0.042458	0.10347	1338
BMgn006905	0.042518	0.10359	1339
BMgn016927	0.042531	0.076424	1340
BMgn014483	0.042601	0.076547	1341
BMgn015488	0.042623	0.042571	1342
BMgn011742	0.042684	0.10396	1343
BMgn014723	0.042702	0.076732	1344
BMgn006151	0.042766	0.07684	1345
BMgn015734	0.042768	0.10415	1346
BMgn012985	0.042768	0.076842	1347
BMgn013094	0.042784	0.076868	1348
BMgn014068	0.042843	0.076962	1349
BMgn015952	0.042851	0.10436	1350
BMgn008090	0.042867	0.077	1351
BMgn003515	0.04288	0.077018	1352
BMgn015234	0.042898	0.1265	1353
BMgn006117	0.042949	0.077143	1354
BMgn013174	0.042987	0.12674	1355
BMgn001011	0.042991	0.077212	1356
BMgn006365	0.043043	0.10476	1357
BMgn002619	0.043055	0.10478	1358
BMgn008572	0.043186	0.10507	1359
BMgn009858	0.043205	0.10511	1360
BMgn014612	0.043229	0.12733	1361
BMgn015804	0.043233	0.077631	1362
BMgn013730	0.043275	0.10526	1363
BMgn004624	0.04328	0.10527	1364
BMgn009339	0.043422	0.1469	1365
BMgn007794	0.04368	0.12854	1366
BMgn008175	0.04373	0.10629	1367
BMgn003237	0.043791	0.043761	1368
BMgn002033	0.043801	0.12883	1369
BMgn012739	0.043827	0.078665	1370
BMgn017248	0.043847	0.10656	1371
BMgn015439	0.043877	0.04385	1372
BMgn008757	0.043878	0.12905	1373
BMgn010669	0.043904	0.12911	1374
BMgn001666	0.043967	0.07889	1375
BMgn010301	0.044015	0.10692	1376
BMgn001039	0.044072	0.10705	1377
BMgn009466	0.044106	0.079139	1378
BMgn014312	0.044247	0.044219	1379
BMgn003364	0.044273	0.079415	1380
BMgn013052	0.044304	0.044283	1381
BMgn012925	0.044368	0.13031	1382
BMgn004928	0.044375	0.10769	1383
BMgn014333	0.044451	0.10786	1384
BMgn002947	0.044475	0.044468	1385
BMgn003509	0.044504	0.0445	1386
BMgn008558	0.044548	0.13075	1387
BMgn008071	0.044548	0.13075	1388
BMgn010272	0.044579	0.10813	1389
BMgn014054	0.044579	0.10813	1390
BMgn004578	0.044579	0.10813	1391
BMgn009665	0.044579	0.10813	1392
BMgn003866	0.044579	0.10813	1393
BMgn002868	0.044619	0.080049	1394
BMgn008950	0.044619	0.080049	1395
BMgn012356	0.044619	0.080049	1396
BMgn012319	0.044619	0.080049	1397
BMgn011735	0.044619	0.080049	1398
BMgn015039	0.044619	0.080049	1399
BMgn011787	0.044619	0.080049	1400
BMgn013979	0.044619	0.080049	1401
BMgn005489	0.044646	0.044635	1402
BMgn001819	0.044662	0.13105	1403
BMgn014892	0.044676	0.10835	1404
BMgn009600	0.044704	0.13117	1405
BMgn000592	0.044763	0.13132	1406
BMgn009745	0.044775	0.080295	1407
BMgn000727	0.044998	0.080644	1408
BMgn014215	0.045045	0.045054	1409
BMgn016169	0.045053	0.080737	1410
BMgn011709	0.045102	0.13219	1411
BMgn007368	0.045387	0.045416	1412
BMgn008337	0.045387	0.081281	1413
BMgn005529	0.045433	0.13301	1414
BMgn002443	0.045558	0.045596	1415
BMgn008258	0.045588	0.11031	1416
BMgn000823	0.04561	0.081643	1417
BMgn012456	0.045613	0.11036	1418
BMgn013414	0.045616	0.11037	1419
BMgn013650	0.045629	0.1335	1420
BMgn006384	0.045671	0.11049	1421
BMgn008562	0.045754	0.11068	1422
BMgn003327	0.045786	0.045792	1423
BMgn009707	0.045799	0.13395	1424
BMgn006659	0.045833	0.082045	1425
BMgn013991	0.045839	0.15391	1426
BMgn014370	0.045866	0.15399	1427
BMgn011675	0.045944	0.082236	1428
BMgn015972	0.046012	0.15443	1429
BMgn011099	0.046018	0.11127	1430
BMgn008084	0.046024	0.13452	1431
BMgn001629	0.046039	0.082387	1432
BMgn002739	0.046043	0.046036	1433
BMgn006844	0.046068	0.15459	1434
BMgn009457	0.046093	0.1347	1435
BMgn001080	0.046097	0.11144	1436
BMgn000417	0.0461	0.046091	1437
BMgn010125	0.046203	0.13497	1438
BMgn008526	0.046271	0.13514	1439
BMgn013088	0.046308	0.082832	1440
BMgn014918	0.046328	0.046327	1441
BMgn006499	0.046334	0.11199	1442
BMgn000433	0.046368	0.11207	1443
BMgn008811	0.046411	0.1355	1444
BMgn002485	0.046445	0.083048	1445
BMgn001681	0.046456	0.083066	1446
BMgn012501	0.046499	0.046504	1447
BMgn010009	0.046583	0.11255	1448
BMgn011297	0.0466	0.1126	1449
BMgn002736	0.046603	0.083314	1450
BMgn007212	0.046614	0.11262	1451
BMgn014644	0.046802	0.11301	1452
BMgn008294	0.046831	0.11308	1453
BMgn004961	0.046891	0.083806	1454
BMgn011966	0.046898	0.046901	1455
BMgn000814	0.046946	0.083906	1456
BMgn016000	0.046997	0.11343	1457
BMgn007517	0.04709	0.13722	1458
BMgn016853	0.047134	0.084226	1459
BMgn015303	0.047193	0.15771	1460
BMgn001386	0.047224	0.084381	1461
BMgn010987	0.047336	0.084563	1462
BMgn010013	0.047347	0.17496	1463
BMgn006731	0.047447	0.084748	1464
BMgn001454	0.047452	0.11442	1465
BMgn001590	0.047639	0.04765	1466
BMgn014611	0.047707	0.11495	1467
BMgn006049	0.047707	0.11495	1468
BMgn010307	0.047707	0.11495	1469
BMgn007798	0.047781	0.085307	1470
BMgn000827	0.047836	0.08539	1471
BMgn003501	0.047849	0.11526	1472
BMgn011982	0.047924	0.047947	1473
BMgn009731	0.047986	0.11556	1474
BMgn012377	0.047992	0.085633	1475
BMgn016614	0.048001	0.16003	1476
BMgn002100	0.048003	0.085652	1477
BMgn009581	0.048079	0.085761	1478
BMgn002527	0.048198	0.085969	1479
BMgn002946	0.048217	0.085996	1480
BMgn008711	0.048236	0.14001	1481
BMgn011746	0.048279	0.086108	1482
BMgn009566	0.048354	0.086232	1483
BMgn009620	0.04838	0.048387	1484
BMgn007059	0.048531	0.14073	1485
BMgn005385	0.048643	0.086725	1486
BMgn014600	0.048652	0.11705	1487
BMgn003276	0.048665	0.04871	1488
BMgn000991	0.048693	0.086807	1489
BMgn004788	0.048802	0.16233	1490
BMgn015963	0.048807	0.11735	1491
BMgn015154	0.048807	0.048866	1492
BMgn008079	0.048837	0.087041	1493
BMgn015490	0.04887	0.087095	1494
BMgn001327	0.048893	0.048946	1495
BMgn008465	0.04897	0.087271	1496
BMgn008636	0.049064	0.14211	1497
BMgn000853	0.049064	0.049139	1498
BMgn014283	0.049136	0.16327	1499
BMgn006075	0.04917	0.14238	1500
BMgn000606	0.049171	0.087609	1501
BMgn005500	0.049207	0.11823	1502
BMgn002731	0.049277	0.16365	1503
BMgn011661	0.049315	0.14274	1504
BMgn000261	0.049322	0.11848	1505
BMgn014909	0.049396	0.11864	1506
BMgn011189	0.049449	0.088086	1507
BMgn001743	0.049457	0.14313	1508
BMgn005549	0.049476	0.14318	1509
BMgn000303	0.049479	0.11881	1510
BMgn004954	0.049603	0.11908	1511
BMgn000852	0.049634	0.049731	1512
BMgn010719	0.049668	0.11921	1513
BMgn000546	0.049737	0.11936	1514
BMgn006582	0.04978	0.16506	1515
BMgn013564	0.049809	0.1195	1516
BMgn016214	0.049853	0.11958	1517
BMgn012785	0.049892	0.11967	1518
BMgn004473	0.049986	0.16564	1519
BMgn011608	0.050004	0.1199	1520
BMgn015056	0.050048	0.14463	1521
BMgn016359	0.050054	0.16582	1522
BMgn008246	0.050061	0.050156	1523
BMgn013462	0.050115	0.089205	1524
BMgn003514	0.050118	0.050207	1525
BMgn006114	0.050232	0.05032	1526
BMgn014908	0.050282	0.089482	1527
BMgn005714	0.050289	0.05038	1528
BMgn015388	0.050368	0.089632	1529
BMgn016435	0.050368	0.089632	1530
BMgn009552	0.050368	0.089632	1531
BMgn011123	0.050368	0.089632	1532
BMgn012272	0.050368	0.089632	1533
BMgn003339	0.050368	0.089632	1534
BMgn005080	0.050368	0.089632	1535
BMgn012330	0.050368	0.089632	1536
BMgn010611	0.050368	0.089632	1537
BMgn005131	0.050368	0.089632	1538
BMgn007974	0.050368	0.089632	1539
BMgn012474	0.050393	0.089676	1540
BMgn013945	0.050449	0.089761	1541
BMgn008626	0.050487	0.14574	1542
BMgn002609	0.050635	0.12126	1543
BMgn002293	0.050671	0.14621	1544
BMgn003894	0.050917	0.14683	1545
BMgn000124	0.05106	0.090779	1546
BMgn015328	0.051062	0.12223	1547
BMgn007895	0.051062	0.12223	1548
BMgn003997	0.051062	0.12223	1549
BMgn000983	0.051062	0.12223	1550
BMgn013223	0.051062	0.12223	1551
BMgn006932	0.051062	0.12223	1552
BMgn016332	0.051062	0.12223	1553
BMgn003982	0.051062	0.12223	1554
BMgn010036	0.051066	0.1472	1555
BMgn014958	0.051066	0.1472	1556
BMgn004894	0.051087	0.051154	1557
BMgn012067	0.051115	0.090872	1558
BMgn002038	0.051167	0.16889	1559
BMgn009088	0.051171	0.090954	1560
BMgn001687	0.051176	0.12248	1561
BMgn016153	0.051176	0.12248	1562
BMgn000369	0.051176	0.12248	1563
BMgn016764	0.051176	0.12248	1564
BMgn015640	0.051176	0.12248	1565
BMgn010041	0.051176	0.12248	1566
BMgn011094	0.051176	0.12248	1567
BMgn000538	0.051176	0.12248	1568
BMgn008223	0.051176	0.12248	1569
BMgn005289	0.051176	0.12248	1570
BMgn013454	0.051176	0.12248	1571
BMgn001919	0.051258	0.051316	1572
BMgn007401	0.051504	0.09149	1573
BMgn009138	0.051587	0.09164	1574
BMgn012117	0.051738	0.17045	1575
BMgn005656	0.051802	0.14905	1576
BMgn003169	0.051811	0.092042	1577
BMgn009937	0.051828	0.051894	1578
BMgn012658	0.05185	0.14917	1579
BMgn011259	0.05185	0.14917	1580
BMgn009925	0.05185	0.14917	1581
BMgn014976	0.051892	0.092173	1582
BMgn004553	0.051915	0.17096	1583
BMgn012836	0.051942	0.052004	1584
BMgn016892	0.051948	0.092274	1585
BMgn001097	0.051956	0.12417	1586
BMgn007497	0.05198	0.092327	1587
BMgn008364	0.052019	0.092381	1588
BMgn014245	0.052039	0.12435	1589
BMgn005394	0.052045	0.092432	1590
BMgn013164	0.052113	0.052172	1591
BMgn012080	0.052114	0.092549	1592
BMgn017499	0.052123	0.092564	1593
BMgn014639	0.052225	0.092738	1594
BMgn009319	0.052253	0.092781	1595
BMgn012698	0.052281	0.092833	1596
BMgn008581	0.052286	0.12488	1597
BMgn001055	0.052331	0.092913	1598
BMgn000607	0.052357	0.092962	1599
BMgn014058	0.052392	0.09302	1600
BMgn004718	0.052459	0.15075	1601
BMgn006884	0.052501	0.093189	1602
BMgn009514	0.052534	0.12544	1603
BMgn002936	0.052558	0.093293	1604
BMgn008683	0.052566	0.093313	1605
BMgn001623	0.052569	0.052614	1606
BMgn017054	0.052685	0.12575	1607
BMgn011154	0.052712	0.052757	1608
BMgn011061	0.052757	0.12591	1609
BMgn014497	0.052762	0.093635	1610
BMgn004512	0.052792	0.17341	1611
BMgn000483	0.052853	0.12612	1612
BMgn010490	0.052865	0.12615	1613
BMgn008496	0.053002	0.094032	1614
BMgn004760	0.053064	0.094155	1615
BMgn002675	0.053103	0.094231	1616
BMgn010867	0.053143	0.094285	1617
BMgn011724	0.053193	0.12683	1618
BMgn011198	0.053195	0.094381	1619
BMgn003383	0.053224	0.094436	1620
BMgn003441	0.053235	0.094451	1621
BMgn011903	0.053276	0.12702	1622
BMgn015417	0.053279	0.094523	1623
BMgn014420	0.053358	0.12719	1624
BMgn000126	0.053396	0.053418	1625
BMgn012153	0.053473	0.15331	1626
BMgn007928	0.053485	0.09486	1627
BMgn016323	0.053554	0.1535	1628
BMgn007919	0.053722	0.095273	1629
BMgn007534	0.053778	0.095382	1630
BMgn006399	0.053834	0.095461	1631
BMgn013221	0.053852	0.053861	1632
BMgn011749	0.053881	0.095535	1633
BMgn001621	0.053966	0.053963	1634
BMgn016271	0.053994	0.053992	1635
BMgn006580	0.05404	0.09583	1636
BMgn008623	0.054061	0.15479	1637
BMgn008024	0.054066	0.054061	1638
BMgn017474	0.054093	0.095925	1639
BMgn007576	0.054137	0.054126	1640
BMgn001958	0.054182	0.12895	1641
BMgn003422	0.054208	0.054191	1642
BMgn008503	0.054208	0.054191	1643
BMgn014858	0.054212	0.096131	1644
BMgn017116	0.054251	0.054231	1645
BMgn000928	0.054277	0.096247	1646
BMgn000284	0.054398	0.15563	1647
BMgn012416	0.054398	0.15563	1648
BMgn013451	0.054398	0.15563	1649
BMgn004381	0.054415	0.178	1650
BMgn015642	0.054429	0.15571	1651
BMgn002996	0.054499	0.096637	1652
BMgn012302	0.054512	0.12967	1653
BMgn006949	0.054539	0.12972	1654
BMgn005118	0.054539	0.12972	1655
BMgn012190	0.054539	0.12972	1656
BMgn013062	0.054539	0.12972	1657
BMgn010269	0.054539	0.12972	1658
BMgn002740	0.054539	0.12972	1659
BMgn007771	0.054539	0.12972	1660
BMgn003805	0.054539	0.12972	1661
BMgn008300	0.054539	0.12972	1662
BMgn013848	0.054539	0.12972	1663
BMgn007327	0.054539	0.12972	1664
BMgn003659	0.054555	0.096728	1665
BMgn009512	0.054579	0.1561	1666
BMgn015527	0.054594	0.17851	1667
BMgn016857	0.054621	0.054575	1668
BMgn016945	0.054638	0.096863	1669
BMgn005247	0.054763	0.15657	1670
BMgn002717	0.054776	0.097105	1671
BMgn007914	0.054792	0.054756	1672
BMgn015906	0.054887	0.097298	1673
BMgn010253	0.054965	0.15705	1674
BMgn013768	0.055006	0.13077	1675
BMgn003135	0.055065	0.097603	1676
BMgn012215	0.055145	0.097751	1677
BMgn010232	0.055166	0.15756	1678
BMgn013555	0.055244	0.15775	1679
BMgn014660	0.055253	0.097922	1680
BMgn006917	0.055279	0.09797	1681
BMgn011568	0.055417	0.13163	1682
BMgn010997	0.055419	0.055362	1683
BMgn014965	0.055441	0.098235	1684
BMgn015111	0.055572	0.15855	1685
BMgn002787	0.055607	0.098499	1686
BMgn002339	0.055663	0.098603	1687
BMgn000689	0.055668	0.13215	1688
BMgn000280	0.05574	0.15897	1689
BMgn009708	0.055761	0.055694	1690
BMgn007099	0.055818	0.055754	1691
BMgn008037	0.055829	0.098889	1692
BMgn015442	0.055834	0.13248	1693
BMgn009350	0.055857	0.13253	1694
BMgn008959	0.055896	0.18212	1695
BMgn006814	0.055961	0.055901	1696
BMgn000944	0.055995	0.099145	1697
BMgn008123	0.056004	0.13283	1698
BMgn007980	0.056004	0.15963	1699
BMgn013480	0.056004	0.15963	1700
BMgn014077	0.056004	0.15963	1701
BMgn013519	0.056004	0.15963	1702
BMgn010066	0.056004	0.15963	1703
BMgn009007	0.056004	0.15963	1704
BMgn006212	0.056004	0.15963	1705
BMgn007574	0.056004	0.15963	1706
BMgn016869	0.056025	0.13288	1707
BMgn000921	0.056075	0.056019	1708
BMgn015335	0.056088	0.13302	1709
BMgn006783	0.056132	0.056073	1710
BMgn012606	0.05624	0.13333	1711
BMgn003211	0.056274	0.056208	1712
BMgn017082	0.056343	0.18333	1713
BMgn002622	0.056383	0.099804	1714
BMgn002052	0.056417	0.056347	1715
BMgn007495	0.056425	0.13373	1716
BMgn013862	0.056438	0.099913	1717
BMgn013332	0.056673	0.056608	1718
BMgn010147	0.056715	0.10038	1719
BMgn000385	0.056872	0.10063	1720
BMgn007748	0.056872	0.10063	1721
BMgn016329	0.056872	0.10063	1722
BMgn003384	0.056872	0.10063	1723
BMgn008546	0.056872	0.10063	1724
BMgn002058	0.056872	0.10063	1725
BMgn007463	0.056872	0.10063	1726
BMgn006723	0.056872	0.10063	1727
BMgn012734	0.056872	0.10063	1728
BMgn015277	0.056872	0.10063	1729
BMgn006681	0.056872	0.10063	1730
BMgn003434	0.056872	0.10063	1731
BMgn014877	0.056872	0.10063	1732
BMgn017399	0.056881	0.10066	1733
BMgn016443	0.056889	0.18476	1734
BMgn006068	0.056932	0.16194	1735
BMgn004716	0.05694	0.16196	1736
BMgn008127	0.05694	0.16196	1737
BMgn011814	0.056998	0.18506	1738
BMgn002057	0.05706	0.13506	1739
BMgn015261	0.057158	0.10112	1740
BMgn000478	0.057215	0.057177	1741
BMgn010400	0.057227	0.13542	1742
BMgn007674	0.057243	0.057205	1743
BMgn011777	0.057272	0.057239	1744
BMgn016705	0.057357	0.13568	1745
BMgn007805	0.057392	0.13575	1746
BMgn007173	0.057443	0.057402	1747
BMgn003036	0.057471	0.057432	1748
BMgn007745	0.057545	0.10177	1749
BMgn008042	0.057556	0.13609	1750
BMgn001168	0.0576	0.10187	1751
BMgn007264	0.057634	0.13625	1752
BMgn013428	0.057704	0.1639	1753
BMgn009462	0.057711	0.10203	1754
BMgn016900	0.057785	0.057761	1755
BMgn015482	0.057803	0.1366	1756
BMgn006995	0.057843	0.13669	1757
BMgn000492	0.057843	0.13669	1758
BMgn004960	0.057843	0.13669	1759
BMgn008909	0.057843	0.13669	1760
BMgn002175	0.057843	0.13669	1761
BMgn008916	0.057843	0.13669	1762
BMgn014508	0.057843	0.13669	1763
BMgn001436	0.057956	0.057949	1764
BMgn001688	0.058072	0.13719	1765
BMgn007178	0.058131	0.13731	1766
BMgn008895	0.058296	0.13767	1767
BMgn016912	0.05832	0.103	1768
BMgn002992	0.058378	0.13785	1769
BMgn016407	0.05844	0.058398	1770
BMgn017180	0.05846	0.13802	1771
BMgn007403	0.058474	0.10325	1772
BMgn008395	0.058497	0.058451	1773
BMgn010901	0.058541	0.10335	1774
BMgn008143	0.058542	0.13819	1775
BMgn011340	0.058596	0.10344	1776
BMgn013159	0.058629	0.13837	1777
BMgn013911	0.058639	0.18945	1778
BMgn001893	0.058707	0.10363	1779
BMgn002603	0.058717	0.13856	1780
BMgn012631	0.058788	0.13872	1781
BMgn000855	0.058911	0.13896	1782
BMgn001750	0.058928	0.104	1783
BMgn017358	0.059094	0.10428	1784
BMgn017025	0.059107	0.19072	1785
BMgn003546	0.059107	0.19072	1786
BMgn001613	0.059117	0.13938	1787
BMgn000351	0.059196	0.059154	1788
BMgn015797	0.059199	0.13954	1789
BMgn011002	0.059423	0.16809	1790
BMgn010362	0.059423	0.16809	1791
BMgn003202	0.059444	0.14007	1792
BMgn009785	0.059445	0.14007	1793
BMgn015873	0.059457	0.1401	1794
BMgn011344	0.05947	0.14013	1795
BMgn009067	0.059554	0.19187	1796
BMgn012750	0.05958	0.059572	1797
BMgn000170	0.059672	0.14053	1798
BMgn003044	0.059679	0.10521	1799
BMgn016558	0.059702	0.10525	1800
BMgn016049	0.059951	0.10565	1801
BMgn009966	0.059951	0.059954	1802
BMgn002007	0.059986	0.10572	1803
BMgn000106	0.060014	0.10577	1804
BMgn006420	0.06002	0.14127	1805
BMgn014361	0.060042	0.10581	1806
BMgn004249	0.060058	0.14135	1807
BMgn003728	0.060065	0.060069	1808
BMgn015971	0.060179	0.060187	1809
BMgn003742	0.060223	0.10612	1810
BMgn015438	0.060265	0.10619	1811
BMgn005250	0.060293	0.060304	1812
BMgn011606	0.060334	0.17024	1813
BMgn004719	0.060366	0.19408	1814
BMgn013458	0.060407	0.060417	1815
BMgn014507	0.060419	0.10646	1816
BMgn016533	0.060559	0.10669	1817
BMgn015618	0.060586	0.10673	1818
BMgn014053	0.060692	0.060718	1819
BMgn015715	0.06072	0.06075	1820
BMgn013766	0.060756	0.10702	1821
BMgn016227	0.060784	0.10706	1822
BMgn009005	0.060807	0.1071	1823
BMgn006053	0.06084	0.14295	1824
BMgn015889	0.060863	0.060884	1825
BMgn011968	0.06097	0.17175	1826
BMgn001871	0.061009	0.10741	1827
BMgn013353	0.061028	0.10744	1828
BMgn011503	0.061079	0.17202	1829
BMgn010736	0.061148	0.061157	1830
BMgn005424	0.061164	0.10766	1831
BMgn010846	0.061179	0.14363	1832
BMgn000262	0.061179	0.14363	1833
BMgn002432	0.061304	0.10789	1834
BMgn010589	0.061359	0.10797	1835
BMgn003273	0.061414	0.14413	1836
BMgn013890	0.06158	0.10836	1837
BMgn009783	0.061604	0.061591	1838
BMgn014479	0.061672	0.19756	1839
BMgn010795	0.061678	0.17351	1840
BMgn009672	0.061732	0.17364	1841
BMgn004492	0.061747	0.061736	1842
BMgn005611	0.061804	0.06179	1843
BMgn012607	0.061824	0.17386	1844
BMgn013468	0.061905	0.14518	1845
BMgn000232	0.061912	0.1089	1846
BMgn004935	0.061973	0.17425	1847
BMgn005786	0.062018	0.17435	1848
BMgn011159	0.062045	0.17441	1849
BMgn008657	0.062203	0.062187	1850
BMgn011192	0.062328	0.1461	1851
BMgn010450	0.062381	0.10969	1852
BMgn011174	0.062422	0.14632	1853
BMgn008179	0.062479	0.14644	1854
BMgn005425	0.062516	0.06251	1855
BMgn004604	0.062602	0.06258	1856
BMgn003481	0.062629	0.11011	1857
BMgn011371	0.062658	0.17589	1858
BMgn010185	0.062685	0.17596	1859
BMgn010989	0.062716	0.17602	1860
BMgn007694	0.062724	0.14695	1861
BMgn000865	0.062753	0.11031	1862
BMgn007222	0.062753	0.11031	1863
BMgn015828	0.062753	0.11031	1864
BMgn017485	0.062753	0.11031	1865
BMgn017491	0.062753	0.11031	1866
BMgn015645	0.062753	0.11031	1867
BMgn005302	0.062753	0.11031	1868
BMgn007383	0.062753	0.11031	1869
BMgn001072	0.062753	0.11031	1870
BMgn001523	0.062753	0.11031	1871
BMgn016672	0.062773	0.062737	1872
BMgn003393	0.06283	0.06279	1873
BMgn003334	0.062841	0.20073	1874
BMgn013660	0.06285	0.11048	1875
BMgn012946	0.062905	0.11057	1876
BMgn013304	0.063002	0.14754	1877
BMgn013902	0.063002	0.14754	1878
BMgn000457	0.063002	0.14754	1879
BMgn006931	0.063002	0.14754	1880
BMgn014358	0.063002	0.14754	1881
BMgn017176	0.063002	0.14754	1882
BMgn013546	0.063002	0.14754	1883
BMgn004449	0.063002	0.14754	1884
BMgn001800	0.063002	0.14754	1885
BMgn004173	0.063002	0.14754	1886
BMgn001558	0.063002	0.14754	1887
BMgn004014	0.063002	0.14754	1888
BMgn010951	0.063002	0.14754	1889
BMgn006337	0.063172	0.1771	1890
BMgn001221	0.063257	0.063236	1891
BMgn014443	0.063281	0.20191	1892
BMgn005156	0.063286	0.063261	1893
BMgn010337	0.063457	0.11146	1894
BMgn015856	0.063567	0.11165	1895
BMgn013507	0.063586	0.14872	1896
BMgn012979	0.063707	0.14897	1897
BMgn003630	0.063736	0.17852	1898
BMgn013529	0.063736	0.14903	1899
BMgn010402	0.063766	0.17859	1900
BMgn004565	0.063787	0.20327	1901
BMgn003619	0.063788	0.11204	1902
BMgn001166	0.063856	0.063853	1903
BMgn006071	0.063856	0.17881	1904
BMgn001254	0.06387	0.14931	1905
BMgn012160	0.063953	0.11229	1906
BMgn011438	0.064084	0.064082	1907
BMgn009845	0.064305	0.11288	1908
BMgn010401	0.064315	0.17998	1909
BMgn008631	0.064339	0.11294	1910
BMgn012122	0.064361	0.1503	1911
BMgn011978	0.064477	0.11319	1912
BMgn008848	0.064519	0.18049	1913
BMgn016635	0.06456	0.11331	1914
BMgn008910	0.064688	0.15102	1915
BMgn002631	0.064711	0.064728	1916
BMgn007118	0.064739	0.064754	1917
BMgn006064	0.064852	0.15137	1918
BMgn011823	0.064879	0.18136	1919
BMgn007616	0.064891	0.11386	1920
BMgn007011	0.064917	0.15151	1921
BMgn007855	0.064917	0.15151	1922
BMgn009660	0.064917	0.15151	1923
BMgn013524	0.064917	0.15151	1924
BMgn003081	0.064917	0.15151	1925
BMgn015564	0.064934	0.15153	1926
BMgn005455	0.064973	0.114	1927
BMgn016573	0.064988	0.18161	1928
BMgn001058	0.065059	0.11415	1929
BMgn010137	0.065166	0.11433	1930
BMgn014100	0.065185	0.22704	1931
BMgn015614	0.065233	0.11444	1932
BMgn009346	0.065237	0.18225	1933
BMgn013828	0.065237	0.18225	1934
BMgn011091	0.065237	0.18225	1935
BMgn016171	0.065237	0.18225	1936
BMgn010897	0.065237	0.18225	1937
BMgn016397	0.065252	0.065291	1938
BMgn011269	0.06534	0.18251	1939
BMgn007557	0.06552	0.18293	1940
BMgn009382	0.065737	0.065771	1941
BMgn013514	0.065874	0.15349	1942
BMgn013868	0.065949	0.11562	1943
BMgn000352	0.066007	0.18408	1944
BMgn009374	0.066028	0.15379	1945
BMgn011054	0.066068	0.18422	1946
BMgn013162	0.06614	0.15402	1947
BMgn003319	0.066159	0.15407	1948
BMgn014272	0.066182	0.15411	1949
BMgn003611	0.066204	0.15415	1950
BMgn009495	0.066606	0.21042	1951
BMgn005340	0.066657	0.15507	1952
BMgn014511	0.066709	0.11688	1953
BMgn006538	0.066815	0.11706	1954
BMgn010743	0.066819	0.11707	1955
BMgn013663	0.066829	0.18605	1956
BMgn004129	0.066832	0.18606	1957
BMgn017298	0.066837	0.1171	1958
BMgn013397	0.066864	0.18615	1959
BMgn006135	0.066864	0.18615	1960
BMgn007378	0.066894	0.15558	1961
BMgn007687	0.066929	0.11725	1962
BMgn005213	0.066962	0.067017	1963
BMgn011550	0.066975	0.15574	1964
BMgn004642	0.067025	0.15587	1965
BMgn007991	0.067051	0.11744	1966
BMgn017387	0.067066	0.15594	1967
BMgn011532	0.067076	0.067132	1968
BMgn002015	0.067094	0.1175	1969
BMgn014963	0.067105	0.067162	1970
BMgn005069	0.067139	0.18678	1971
BMgn003307	0.067221	0.15627	1972
BMgn003775	0.067424	0.11803	1973
BMgn004580	0.067453	0.15676	1974
BMgn011391	0.067456	0.18755	1975
BMgn010275	0.067504	0.067525	1976
BMgn006776	0.067636	0.15712	1977
BMgn007375	0.067645	0.11839	1978
BMgn008668	0.067711	0.15727	1979
BMgn009920	0.067755	0.11855	1980
BMgn009366	0.067773	0.15741	1981
BMgn002659	0.067789	0.067819	1982
BMgn009601	0.067846	0.067869	1983
BMgn013421	0.067881	0.18856	1984
BMgn008453	0.067933	0.15771	1985
BMgn002830	0.068027	0.1889	1986
BMgn000144	0.068102	0.068108	1987
BMgn016373	0.068109	0.18909	1988
BMgn009513	0.068152	0.15814	1989
BMgn015258	0.068152	0.15814	1990
BMgn013806	0.068152	0.15814	1991
BMgn014855	0.068167	0.11924	1992
BMgn003544	0.068167	0.11924	1993
BMgn006637	0.06825	0.11939	1994
BMgn001328	0.068273	0.068283	1995
BMgn009023	0.068277	0.15838	1996
BMgn000889	0.068307	0.18956	1997
BMgn013182	0.068363	0.15854	1998
BMgn012769	0.068461	0.15875	1999
[truncated: 13,074 more rows]

## Sheet: sgRNA score in NPV
sgRNA ID	Gene ID	score
gRNA_70781	BMgn013496	646.1
gRNA_82751	BMgn015639	500.55
gRNA_26877	BMgn005573	382.67
gRNA_39021	BMgn007770	359.87
gRNA_2001	BMgn000432	339.03
gRNA_83413	BMgn015752	335.17
gRNA_89067	BMgn016733	334.09
gRNA_88888	BMgn016701	284.69
gRNA_92243	BMgn017283	268.58
gRNA_36556	BMgn007330	258.92
gRNA_6962	BMgn001509	253.55
gRNA_80189	BMgn015201	250.58
gRNA_73159	BMgn013926	243.88
gRNA_51812	BMgn010089	231
gRNA_35898	BMgn007215	200.93
gRNA_34089	BMgn006888	191.82
gRNA_42723	BMgn008433	188.66
gRNA_5924	BMgn001286	179.35
gRNA_14323	BMgn003094	176.79
gRNA_82097	BMgn015526	169.78
gRNA_53781	BMgn010439	169.55
gRNA_68533	BMgn013102	165.62
gRNA_16479	BMgn003555	159.16
gRNA_76716	BMgn014606	151.53
gRNA_11705	BMgn002538	142.93
gRNA_40526	BMgn008035	141.76
gRNA_13357	BMgn002886	139.71
gRNA_91776	BMgn017204	136.14
gRNA_88701	BMgn016667	134.34
gRNA_75178	BMgn014311	129.64
gRNA_23806	BMgn005012	125.84
gRNA_75190	BMgn014313	123.16
gRNA_40443	BMgn008021	120.89
gRNA_77006	BMgn014658	120.76
gRNA_21559	BMgn004615	110.72
gRNA_37443	BMgn007492	110.67
gRNA_70292	BMgn013408	109.64
gRNA_75333	BMgn014339	109.64
gRNA_41780	BMgn008268	107.92
gRNA_76422	BMgn014546	107.16
gRNA_46076	BMgn009033	104.86
gRNA_28019	BMgn005782	103.2
gRNA_13110	BMgn002834	100.07
gRNA_73560	BMgn014003	96.755
gRNA_8320	BMgn001799	94.222
gRNA_89649	BMgn016833	93.72
gRNA_59564	BMgn011474	93.533
gRNA_68755	BMgn013140	92.851
gRNA_23825	BMgn005015	91.88
gRNA_64447	BMgn012348	91.14
gRNA_15403	BMgn003329	90.677
gRNA_70755	BMgn013492	88.273
gRNA_53394	BMgn010372	88.164
gRNA_29019	BMgn005968	87.955
gRNA_69382	BMgn013250	86.699
gRNA_72987	BMgn013897	86.239
gRNA_46985	BMgn009201	84.964
gRNA_84363	BMgn015914	83.052
gRNA_16917	BMgn003649	82.364
gRNA_28987	BMgn005961	80.646
gRNA_32274	BMgn006562	78.674
gRNA_82031	BMgn015515	78.632
gRNA_5939	BMgn001289	78.101
gRNA_5162	BMgn001121	77.802
gRNA_90053	BMgn016903	77.587
gRNA_45986	BMgn009016	77.252
gRNA_38731	BMgn007715	75.83
gRNA_9958	BMgn002152	75.196
gRNA_74483	BMgn014177	74.875
gRNA_70248	BMgn013401	73.404
gRNA_23079	BMgn004884	70.428
gRNA_38157	BMgn007615	70.238
gRNA_58266	BMgn011242	69.661
gRNA_70999	BMgn013534	68.942
gRNA_36162	BMgn007262	68.833
gRNA_17238	BMgn003717	68.833
gRNA_11085	BMgn002406	68.583
gRNA_13040	BMgn002820	67.533
gRNA_76193	BMgn014506	66.717
gRNA_9444	BMgn002041	66.685
gRNA_63275	BMgn012137	66.685
gRNA_68857	BMgn013157	66.685
gRNA_57842	BMgn011158	66.234
gRNA_9669	BMgn002091	65.611
gRNA_10118	BMgn002192	64.772
gRNA_51062	BMgn009947	64.537
gRNA_26891	BMgn005575	64.537
gRNA_40876	BMgn008098	64.536
gRNA_6407	BMgn001389	63.811
gRNA_20684	BMgn004451	63.668
gRNA_22398	BMgn004765	63.626
gRNA_44596	BMgn008773	63.566
gRNA_88628	BMgn016654	63.463
gRNA_21563	BMgn004616	63.301
gRNA_74122	BMgn014106	63.139
gRNA_46615	BMgn009131	62.435
gRNA_75638	BMgn014403	62.389
gRNA_24565	BMgn005157	62.389
gRNA_70595	BMgn013464	61.738
gRNA_44985	BMgn008842	61.426
gRNA_75491	BMgn014375	61.343
gRNA_35941	BMgn007223	61.315
gRNA_84370	BMgn015916	61.061
gRNA_24345	BMgn005116	60.241
gRNA_70932	BMgn013522	59.588
gRNA_74017	BMgn014088	57.455
gRNA_34460	BMgn006956	57.348
gRNA_84551	BMgn015949	56.648
gRNA_87149	BMgn016399	55.946
gRNA_10572	BMgn002294	55.796
gRNA_42824	BMgn008450	55.036
gRNA_81097	BMgn015355	54.958
gRNA_92075	BMgn017255	54.877
gRNA_71066	BMgn013545	54.623
gRNA_89219	BMgn016759	53.773
gRNA_38019	BMgn007592	53.702
gRNA_56757	BMgn010961	53.458
gRNA_2086	BMgn000450	52.954
gRNA_30059	BMgn006154	52.824
gRNA_40508	BMgn008032	52.418
gRNA_50394	BMgn009815	52.15
gRNA_47010	BMgn009206	51.937
gRNA_34417	BMgn006948	51.65
gRNA_3626	BMgn000786	51.65
gRNA_53102	BMgn010319	51.487
gRNA_40535	BMgn008036	51.408
gRNA_71525	BMgn013631	50.724
gRNA_20084	BMgn004344	50.487
gRNA_1771	BMgn000380	50.061
gRNA_36535	BMgn007325	49.544
gRNA_26295	BMgn005470	48.837
gRNA_76797	BMgn014623	48.713
gRNA_11539	BMgn002505	48.428
gRNA_6082	BMgn001320	47.934
gRNA_37754	BMgn007544	47.435
gRNA_7807	BMgn001690	47.354
gRNA_1247	BMgn000274	47.037
gRNA_53209	BMgn010339	46.793
gRNA_26333	BMgn005477	46.512
gRNA_44549	BMgn008758	46.502
gRNA_11612	BMgn002519	46.411
gRNA_3621	BMgn000784	46.28
gRNA_1024	BMgn000225	46.17
gRNA_80579	BMgn015267	45.791
gRNA_76913	BMgn014642	45.633
gRNA_20602	BMgn004437	45.513
gRNA_31545	BMgn006433	45.206
gRNA_35346	BMgn007110	44.92
gRNA_13559	BMgn002928	44.381
gRNA_82811	BMgn015650	44.132
gRNA_83666	BMgn015796	43.933
gRNA_46049	BMgn009027	43.117
gRNA_76483	BMgn014556	43.065
gRNA_29154	BMgn005991	43.058
gRNA_62870	BMgn012066	43.058
gRNA_71369	BMgn013601	42.852
gRNA_15481	BMgn003345	41.595
gRNA_88419	BMgn016617	41.459
gRNA_66255	BMgn012683	41.082
gRNA_49286	BMgn009616	40.911
gRNA_55594	BMgn010755	40.231
gRNA_61630	BMgn011846	40.115
gRNA_33083	BMgn006709	39.18
gRNA_29442	BMgn006041	38.829
gRNA_65197	BMgn012489	38.768
gRNA_83536	BMgn015774	38.72
gRNA_3419	BMgn000740	38.117
gRNA_6338	BMgn001374	38.033
gRNA_24523	BMgn005148	37.689
gRNA_90018	BMgn016896	37.589
gRNA_8099	BMgn001751	37.583
gRNA_13759	BMgn002973	37.413
gRNA_85045	BMgn016034	37.27
gRNA_30822	BMgn006293	36.746
gRNA_30916	BMgn006312	36.454
gRNA_67909	BMgn012984	36.383
gRNA_59403	BMgn011447	36.323
gRNA_30814	BMgn006292	36.092
gRNA_78450	BMgn014904	36.089
gRNA_4150	BMgn000899	36.016
gRNA_7385	BMgn001599	35.986
gRNA_46273	BMgn009068	35.918
gRNA_30796	BMgn006289	35.799
gRNA_89807	BMgn016861	35.547
gRNA_10701	BMgn002324	35.541
gRNA_62499	BMgn012002	35.463
gRNA_39187	BMgn007797	35.42
gRNA_62579	BMgn012015	35.388
gRNA_48850	BMgn009540	35.343
gRNA_30362	BMgn006209	35.076
gRNA_19326	BMgn004182	35.052
gRNA_78311	BMgn014881	34.953
gRNA_78722	BMgn014950	34.682
gRNA_90707	BMgn017017	34.595
gRNA_81314	BMgn015391	34.497
gRNA_22888	BMgn004850	34.482
gRNA_46131	BMgn009044	34.296
gRNA_15254	BMgn003297	34.239
gRNA_20040	BMgn004335	34.051
gRNA_67524	BMgn012916	34.021
gRNA_84807	BMgn015993	34.004
gRNA_49816	BMgn009713	34.004
gRNA_58637	BMgn011307	34.004
gRNA_75939	BMgn014456	33.789
gRNA_37060	BMgn007427	33.666
gRNA_70605	BMgn013466	33.382
gRNA_48776	BMgn009528	33.281
gRNA_41416	BMgn008196	33.26
gRNA_56965	BMgn010998	33.135
gRNA_89435	BMgn016796	33.037
gRNA_47166	BMgn009236	33.033
gRNA_49813	BMgn009713	32.951
gRNA_50853	BMgn009903	32.818
gRNA_81315	BMgn015391	32.652
gRNA_55834	BMgn010797	32.643
gRNA_85491	BMgn016112	32.485
gRNA_37383	BMgn007482	32.359
gRNA_63213	BMgn012127	32.319
gRNA_8645	BMgn001867	32.319
gRNA_19725	BMgn004271	31.878
gRNA_75098	BMgn014293	31.851
gRNA_66047	BMgn012642	31.718
gRNA_32149	BMgn006540	31.624
gRNA_40122	BMgn007964	31.569
gRNA_22843	BMgn004841	31.568
gRNA_61725	BMgn011863	31.356
gRNA_10241	BMgn002219	31.245
gRNA_87175	BMgn016404	31.232
gRNA_47309	BMgn009265	31.178
gRNA_25473	BMgn005320	30.839
gRNA_8542	BMgn001847	30.806
gRNA_21094	BMgn004525	30.573
gRNA_90718	BMgn017019	30.526
gRNA_3733	BMgn000812	29.855
gRNA_14834	BMgn003208	29.751
gRNA_10968	BMgn002381	29.66
gRNA_28320	BMgn005838	29.569
gRNA_45159	BMgn008871	29.373
gRNA_25695	BMgn005360	29.362
gRNA_48615	BMgn009499	29.335
gRNA_81262	BMgn015383	29.191
gRNA_60201	BMgn011591	29.097
gRNA_88239	BMgn016587	29.097
gRNA_46521	BMgn009115	29.097
gRNA_24303	BMgn005107	28.912
gRNA_27453	BMgn005681	28.898
gRNA_18238	BMgn003940	28.887
gRNA_5244	BMgn001139	28.852
gRNA_12191	BMgn002641	28.706
gRNA_18151	BMgn003921	28.613
gRNA_49178	BMgn009597	28.542
gRNA_91222	BMgn017106	28.514
gRNA_11560	BMgn002509	28.469
gRNA_5265	BMgn001144	28.415
gRNA_70109	BMgn013378	28.373
gRNA_6429	BMgn001393	28.091
gRNA_61187	BMgn011767	28.091
gRNA_75783	BMgn014429	28.023
gRNA_41431	BMgn008201	27.891
gRNA_24759	BMgn005194	27.546
gRNA_67948	BMgn012992	27.513
gRNA_88635	BMgn016656	27.392
gRNA_12659	BMgn002738	27.313
gRNA_33766	BMgn006830	27.234
gRNA_56411	BMgn010902	27.233
gRNA_70191	BMgn013391	27.173
gRNA_91511	BMgn017158	27.134
gRNA_22900	BMgn004852	27.094
gRNA_43210	BMgn008523	26.949
gRNA_39586	BMgn007871	26.949
gRNA_91026	BMgn017073	26.949
gRNA_85082	BMgn016041	26.935
gRNA_69724	BMgn013308	26.864
gRNA_90356	BMgn016956	26.797
gRNA_15376	BMgn003323	26.79
gRNA_75363	BMgn014352	26.709
gRNA_4371	BMgn000948	26.693
gRNA_4720	BMgn001024	26.675
gRNA_36562	BMgn007331	26.591
gRNA_53476	BMgn010386	26.517
gRNA_81031	BMgn015344	26.452
gRNA_49148	BMgn009592	26.441
gRNA_32477	BMgn006601	26.377
gRNA_55164	BMgn010680	26.365
gRNA_13028	BMgn002817	26.313
gRNA_63053	BMgn012098	26.19
gRNA_38074	BMgn007601	26.133
gRNA_70898	BMgn013516	26.087
gRNA_81663	BMgn015452	26.018
gRNA_83405	BMgn015751	25.876
gRNA_42503	BMgn008394	25.876
gRNA_75144	BMgn014304	25.631
gRNA_13368	BMgn002888	25.621
gRNA_30426	BMgn006221	25.505
gRNA_92941	BMgn017403	25.475
gRNA_84001	BMgn015853	25.423
gRNA_3936	BMgn000854	25.422
gRNA_12919	BMgn002794	25.349
gRNA_78020	BMgn014832	25.343
gRNA_60835	BMgn011704	25.292
gRNA_5870	BMgn001273	25.24
gRNA_42380	BMgn008373	25.181
gRNA_24171	BMgn005079	25.176
gRNA_42770	BMgn008441	25.152
gRNA_60903	BMgn011718	25.083
gRNA_91	BMgn000020	24.802
gRNA_86690	BMgn016318	24.681
gRNA_72929	BMgn013888	24.637
gRNA_64427	BMgn012344	24.55
gRNA_21850	BMgn004668	24.495
gRNA_26594	BMgn005524	24.478
gRNA_32240	BMgn006556	24.475
gRNA_90720	BMgn017019	24.405
gRNA_1441	BMgn000314	24.394
gRNA_4468	BMgn000970	24.32
gRNA_81936	BMgn015499	24.319
gRNA_56235	BMgn010869	24.235
gRNA_9896	BMgn002140	24.224
gRNA_6133	BMgn001331	24.223
gRNA_36442	BMgn007309	24.053
gRNA_44132	BMgn008685	24.032
gRNA_2470	BMgn000533	24.013
gRNA_62496	BMgn012001	23.955
gRNA_38058	BMgn007598	23.879
gRNA_75216	BMgn014317	23.828
gRNA_3148	BMgn000684	23.751
gRNA_92661	BMgn017356	23.75
gRNA_46989	BMgn009201	23.728
gRNA_75018	BMgn014276	23.728
gRNA_84691	BMgn015972	23.728
gRNA_91130	BMgn017090	23.728
gRNA_93513	BMgn017506	23.674
gRNA_67817	BMgn012967	23.646
gRNA_13175	BMgn002848	23.263
gRNA_93604	BMgn017521	23.258
gRNA_9886	BMgn002138	23.212
gRNA_16604	BMgn003581	23.166
gRNA_26152	BMgn005445	23.16
gRNA_3273	BMgn000710	23.121
gRNA_88543	BMgn016639	23.047
gRNA_40573	BMgn008044	22.905
gRNA_56095	BMgn010843	22.868
gRNA_76708	BMgn014603	22.834
gRNA_57390	BMgn011074	22.69
gRNA_24479	BMgn005140	22.682
gRNA_75781	BMgn014429	22.654
gRNA_79486	BMgn015081	22.574
gRNA_31245	BMgn006369	22.313
gRNA_49024	BMgn009572	22.264
gRNA_12341	BMgn002672	22.264
gRNA_66404	BMgn012712	22.236
gRNA_69884	BMgn013337	22.232
gRNA_56480	BMgn010914	22.225
gRNA_31445	BMgn006408	22.223
gRNA_34951	BMgn007041	22.22
gRNA_40154	BMgn007970	22.188
gRNA_32385	BMgn006582	22.104
gRNA_44463	BMgn008744	22.053
gRNA_86929	BMgn016359	22.052
gRNA_77242	BMgn014699	22.026
gRNA_24595	BMgn005162	21.945
gRNA_84389	BMgn015920	21.912
gRNA_14562	BMgn003148	21.877
gRNA_31110	BMgn006345	21.861
gRNA_8859	BMgn001914	21.841
gRNA_86566	BMgn016297	21.836
gRNA_75958	BMgn014460	21.75
gRNA_28110	BMgn005803	21.661
gRNA_4821	BMgn001045	21.62
gRNA_15995	BMgn003451	21.58
gRNA_49574	BMgn009668	21.58
gRNA_17284	BMgn003727	21.58
gRNA_81455	BMgn015415	21.488
gRNA_63324	BMgn012147	21.488
gRNA_44488	BMgn008748	21.42
gRNA_30069	BMgn006156	21.353
gRNA_16255	BMgn003507	21.288
gRNA_2110	BMgn000455	21.282
gRNA_70954	BMgn013525	21.172
gRNA_24371	BMgn005121	21.119
gRNA_28147	BMgn005809	21.101
gRNA_20305	BMgn004383	21.028
gRNA_80386	BMgn015234	20.975
gRNA_19311	BMgn004179	20.937
gRNA_28909	BMgn005947	20.891
gRNA_76750	BMgn014612	20.876
gRNA_74472	BMgn014175	20.854
gRNA_88241	BMgn016587	20.835
gRNA_85691	BMgn016145	20.794
gRNA_55983	BMgn010824	20.774
gRNA_39502	BMgn007853	20.717
gRNA_2821	BMgn000611	20.586
gRNA_66342	BMgn012699	20.506
gRNA_32802	BMgn006656	20.506
gRNA_65749	BMgn012591	20.506
gRNA_23934	BMgn005037	20.506
gRNA_90506	BMgn016982	20.442
gRNA_38614	BMgn007695	20.301
gRNA_8407	BMgn001819	20.241
gRNA_51227	BMgn009979	20.145
gRNA_54910	BMgn010638	20.105
gRNA_77650	BMgn014769	20.07
gRNA_60862	BMgn011709	20.057
gRNA_79456	BMgn015076	20.038
gRNA_67581	BMgn012925	20
gRNA_26626	BMgn005529	19.994
gRNA_82252	BMgn015553	19.981
gRNA_88908	BMgn016704	19.941
gRNA_63749	BMgn012221	19.912
gRNA_84804	BMgn015993	19.797
gRNA_82284	BMgn015559	19.759
gRNA_48375	BMgn009457	19.61
gRNA_52012	BMgn010125	19.55
gRNA_44513	BMgn008752	19.526
gRNA_63933	BMgn012254	19.483
gRNA_12411	BMgn002687	19.379
gRNA_25818	BMgn005382	19.378
gRNA_56751	BMgn010960	19.34
gRNA_59688	BMgn011496	19.319
gRNA_77463	BMgn014737	19.304
gRNA_18300	BMgn003953	19.241
gRNA_73067	BMgn013911	19.185
gRNA_85420	BMgn016099	19.182
gRNA_22716	BMgn004819	19.082
gRNA_86320	BMgn016254	19.008
gRNA_49213	BMgn009603	18.98
gRNA_92659	BMgn017356	18.839
gRNA_39644	BMgn007881	18.699
gRNA_33554	BMgn006794	18.685
gRNA_75053	BMgn014283	18.683
gRNA_13481	BMgn002911	18.668
gRNA_61415	BMgn011807	18.568
gRNA_91632	BMgn017178	18.557
gRNA_36097	BMgn007250	18.392
gRNA_42742	BMgn008436	18.358
gRNA_83404	BMgn015751	18.358
gRNA_72150	BMgn013742	18.357
gRNA_78660	BMgn014940	18.277
gRNA_56752	BMgn010961	18.247
gRNA_29635	BMgn006075	18.204
gRNA_55810	BMgn010793	18.171
gRNA_30643	BMgn006262	18.146
gRNA_63688	BMgn012209	18.086
gRNA_12189	BMgn002641	18.072
gRNA_58774	BMgn011331	18.05
gRNA_22892	BMgn004850	18.018
gRNA_74188	BMgn014117	17.96
gRNA_79335	BMgn015056	17.944
gRNA_68292	BMgn013057	17.885
gRNA_28975	BMgn005958	17.821
gRNA_34829	BMgn007019	17.805
gRNA_43781	BMgn008626	17.796
gRNA_15431	BMgn003334	17.784
gRNA_86268	BMgn016245	17.778
gRNA_7974	BMgn001724	17.693
gRNA_1662	BMgn000358	17.661
gRNA_69009	BMgn013185	17.647
gRNA_86592	BMgn016301	17.643
gRNA_69638	BMgn013294	17.643
gRNA_21306	BMgn004565	17.636
gRNA_67194	BMgn012858	17.571
gRNA_61722	BMgn011862	17.57
gRNA_79823	BMgn015139	17.568
gRNA_27318	BMgn005656	17.55
gRNA_91269	BMgn017114	17.543
gRNA_32503	BMgn006605	17.506
gRNA_66275	BMgn012687	17.494
gRNA_7687	BMgn001663	17.437
gRNA_87733	BMgn016499	17.424
gRNA_22135	BMgn004718	17.409
gRNA_7466	BMgn001618	17.401
gRNA_57211	BMgn011042	17.393
gRNA_85580	BMgn016127	17.344
gRNA_26987	BMgn005591	17.328
gRNA_46185	BMgn009053	17.284
gRNA_82473	BMgn015591	17.284
gRNA_29460	BMgn006045	17.284
gRNA_67575	BMgn012924	17.284
gRNA_64963	BMgn012444	17.271
gRNA_86715	BMgn016323	17.264
gRNA_27698	BMgn005726	17.23
gRNA_20406	BMgn004400	17.177
gRNA_71268	BMgn013583	17.17
gRNA_37255	BMgn007460	17.128
gRNA_55236	BMgn010694	17.121
gRNA_68540	BMgn013103	17.098
gRNA_2594	BMgn000561	17.022
gRNA_82765	BMgn015642	17.013
gRNA_15637	BMgn003378	16.973
gRNA_59285	BMgn011426	16.942
gRNA_35868	BMgn007210	16.895
gRNA_58302	BMgn011249	16.888
gRNA_59426	BMgn011451	16.847
gRNA_51935	BMgn010112	16.72
gRNA_84445	BMgn015929	16.71
gRNA_29370	BMgn006029	16.681
gRNA_61382	BMgn011801	16.653
gRNA_74274	BMgn014132	16.645
gRNA_91314	BMgn017122	16.626
gRNA_1278	BMgn000280	16.574
gRNA_20326	BMgn004387	16.556
gRNA_4556	BMgn000989	16.533
gRNA_90897	BMgn017049	16.507
gRNA_10165	BMgn002202	16.448
gRNA_34178	BMgn006905	16.367
gRNA_89962	BMgn016887	16.322
gRNA_61040	BMgn011742	16.306
gRNA_83309	BMgn015734	16.299
gRNA_84571	BMgn015952	16.288
gRNA_35026	BMgn007056	16.21
gRNA_22123	BMgn004716	16.21
gRNA_41034	BMgn008127	16.21
gRNA_25575	BMgn005339	16.169
gRNA_33738	BMgn006826	16.159
gRNA_72966	BMgn013894	16.065
gRNA_61450	BMgn011814	16.055
gRNA_53356	BMgn010366	16.05
gRNA_70379	BMgn013428	16.042
gRNA_22252	BMgn004739	16.01
gRNA_78188	BMgn014860	15.971
gRNA_92030	BMgn017248	15.969
gRNA_76063	BMgn014479	15.903
gRNA_9199	BMgn001987	15.874
gRNA_23819	BMgn005014	15.866
gRNA_72969	BMgn013894	15.842
gRNA_26771	BMgn005555	15.814
gRNA_15966	BMgn003446	15.801
gRNA_33149	BMgn006721	15.777
gRNA_37910	BMgn007574	15.776
gRNA_20422	BMgn004403	15.768
gRNA_78379	BMgn014892	15.731
gRNA_64613	BMgn012378	15.665
gRNA_34238	BMgn006916	15.663
gRNA_49196	BMgn009600	15.644
gRNA_17964	BMgn003879	15.641
gRNA_27575	BMgn005702	15.612
gRNA_53909	BMgn010465	15.582
gRNA_20043	BMgn004335	15.575
gRNA_26597	BMgn005524	15.544
gRNA_64662	BMgn012387	15.543
gRNA_2940	BMgn000642	15.538
gRNA_41722	BMgn008258	15.535
gRNA_31330	BMgn006384	15.523
gRNA_43429	BMgn008562	15.447
gRNA_50739	BMgn009882	15.418
gRNA_11297	BMgn002450	15.413
gRNA_25817	BMgn005382	15.382
gRNA_62311	BMgn011968	15.332
gRNA_59724	BMgn011503	15.33
gRNA_6757	BMgn001467	15.309
gRNA_31911	BMgn006499	15.263
gRNA_45888	BMgn008998	15.253
gRNA_15304	BMgn003308	15.236
gRNA_51389	BMgn010009	15.219
gRNA_49597	BMgn009672	15.165
gRNA_58306	BMgn011249	15.16
gRNA_41939	BMgn008294	15.066
gRNA_47436	BMgn009288	14.936
gRNA_84845	BMgn016000	14.86
gRNA_72219	BMgn013760	14.855
gRNA_21782	BMgn004653	14.85
gRNA_18356	BMgn003966	14.796
gRNA_10254	BMgn002221	14.749
gRNA_51880	BMgn010101	14.708
gRNA_6697	BMgn001454	14.708
gRNA_28974	BMgn005958	14.703
gRNA_11786	BMgn002556	14.667
gRNA_14945	BMgn003231	14.648
gRNA_9494	BMgn002053	14.579
gRNA_46419	BMgn009095	14.579
gRNA_74553	BMgn014190	14.56
gRNA_43388	BMgn008555	14.559
gRNA_45658	BMgn008956	14.551
gRNA_65342	BMgn012513	14.515
gRNA_38002	BMgn007589	14.509
gRNA_1593	BMgn000344	14.467
gRNA_82671	BMgn015625	14.465
gRNA_38097	BMgn007605	14.46
gRNA_76687	BMgn014600	14.46
gRNA_72849	BMgn013873	14.419
gRNA_74210	BMgn014122	14.345
gRNA_27606	BMgn005709	14.344
gRNA_71987	BMgn013714	14.333
gRNA_61504	BMgn011823	14.324
gRNA_88158	BMgn016573	14.312
gRNA_33663	BMgn006812	14.3
gRNA_19597	BMgn004241	14.298
gRNA_78480	BMgn014909	14.291
gRNA_1387	BMgn000303	14.284
gRNA_74550	BMgn014190	14.244
gRNA_23484	BMgn004954	14.244
gRNA_64093	BMgn012282	14.242
gRNA_71164	BMgn013564	14.234
gRNA_66809	BMgn012785	14.231
gRNA_48845	BMgn009540	14.185
gRNA_45705	BMgn008964	14.183
gRNA_29551	BMgn006061	14.166
gRNA_63286	BMgn012139	14.11
gRNA_163	BMgn000040	14.084
gRNA_68798	BMgn013147	14.062
gRNA_15546	BMgn003358	14.062
gRNA_71697	BMgn013663	14.028
gRNA_12033	BMgn002609	14.019
gRNA_79985	BMgn015166	14.016
gRNA_39678	BMgn007886	13.996
gRNA_58954	BMgn011364	13.988
gRNA_33215	BMgn006733	13.985
gRNA_23054	BMgn004879	13.972
gRNA_70505	BMgn013449	13.963
gRNA_90096	BMgn016910	13.961
gRNA_83686	BMgn015799	13.954
gRNA_51630	BMgn010054	13.889
gRNA_50088	BMgn009759	13.883
gRNA_12080	BMgn002619	13.877
gRNA_84960	BMgn016019	13.877
gRNA_63747	BMgn012221	13.874
gRNA_55887	BMgn010807	13.823
gRNA_93208	BMgn017449	13.823
gRNA_5057	BMgn001097	13.721
gRNA_76744	BMgn014611	13.715
gRNA_75067	BMgn014285	13.676
gRNA_38127	BMgn007610	13.663
gRNA_43534	BMgn008581	13.634
gRNA_37147	BMgn007441	13.602
gRNA_28405	BMgn005856	13.583
gRNA_48702	BMgn009514	13.582
gRNA_3545	BMgn000768	13.556
gRNA_74387	BMgn014156	13.548
gRNA_34842	BMgn007021	13.542
gRNA_2004	BMgn000433	13.528
gRNA_26940	BMgn005584	13.494
gRNA_45024	BMgn008848	13.48
gRNA_40280	BMgn007993	13.459
gRNA_60935	BMgn011724	13.405
gRNA_93190	BMgn017446	13.4
gRNA_75734	BMgn014420	13.392
gRNA_84234	BMgn015892	13.364
gRNA_77652	BMgn014770	13.357
gRNA_45855	BMgn008993	13.355
gRNA_34197	BMgn006908	13.351
gRNA_88142	BMgn016570	13.327
gRNA_47556	BMgn009309	13.282
gRNA_29080	BMgn005979	13.278
gRNA_7618	BMgn001650	13.244
gRNA_69740	BMgn013311	13.212
gRNA_9055	BMgn001958	13.189
gRNA_67233	BMgn012864	13.188
gRNA_35287	BMgn007100	13.166
gRNA_84867	BMgn016003	13.07
gRNA_64218	BMgn012302	13.045
gRNA_17456	BMgn003763	13.031
gRNA_47588	BMgn009315	13.001
gRNA_62814	BMgn012054	12.988
gRNA_92939	BMgn017403	12.988
gRNA_8032	BMgn001737	12.976
gRNA_72264	BMgn013768	12.904
gRNA_70197	BMgn013392	12.869
gRNA_2115	BMgn000456	12.768
gRNA_74851	BMgn014245	12.732
gRNA_13567	BMgn002929	12.676
gRNA_60080	BMgn011568	12.668
gRNA_4018	BMgn000870	12.648
gRNA_5026	BMgn001091	12.634
gRNA_72716	BMgn013850	12.619
gRNA_22351	BMgn004757	12.619
gRNA_1535	BMgn000333	12.61
gRNA_16154	BMgn003485	12.602
gRNA_63998	BMgn012265	12.59
gRNA_5857	BMgn001271	12.56
gRNA_41941	BMgn008295	12.526
gRNA_65831	BMgn012606	12.511
gRNA_51937	BMgn010112	12.504
gRNA_16394	BMgn003537	12.496
gRNA_59825	BMgn011524	12.485
gRNA_50170	BMgn009774	12.476
gRNA_19034	BMgn004114	12.474
gRNA_2880	BMgn000625	12.473
gRNA_11687	BMgn002534	12.461
gRNA_77053	BMgn014667	12.444
gRNA_3842	BMgn000835	12.44
gRNA_8607	BMgn001860	12.43
gRNA_70538	BMgn013455	12.426
gRNA_53557	BMgn010400	12.414
gRNA_55945	BMgn010817	12.407
gRNA_39233	BMgn007805	12.405
gRNA_46687	BMgn009143	12.391
gRNA_40561	BMgn008042	12.36
gRNA_75862	BMgn014444	12.356
gRNA_46037	BMgn009025	12.314
gRNA_81840	BMgn015482	12.31
gRNA_22624	BMgn004804	12.234
gRNA_52030	BMgn010128	12.23
gRNA_88894	BMgn016702	12.214
gRNA_35712	BMgn007178	12.102
gRNA_66998	BMgn012823	12.097
gRNA_45298	BMgn008895	12.066
gRNA_13854	BMgn002992	12.042
gRNA_91641	BMgn017180	12.022
gRNA_41119	BMgn008143	12.016
gRNA_20053	BMgn004337	11.998
gRNA_2176	BMgn000468	11.994
gRNA_65982	BMgn012631	11.964
gRNA_3941	BMgn000855	11.961
gRNA_76985	BMgn014655	11.961
gRNA_50337	BMgn009805	11.958
gRNA_7439	BMgn001613	11.933
gRNA_83675	BMgn015797	11.926
gRNA_50514	BMgn009835	11.914
gRNA_68952	BMgn013176	11.914
gRNA_50228	BMgn009785	11.909
gRNA_29680	BMgn006083	11.903
gRNA_74834	BMgn014242	11.887
gRNA_29344	BMgn006025	11.886
gRNA_28590	BMgn005890	11.841
gRNA_1592	BMgn000344	11.832
gRNA_61908	BMgn011896	11.829
gRNA_31501	BMgn006420	11.825
gRNA_70120	BMgn013379	11.817
gRNA_74117	BMgn014105	11.808
gRNA_2212	BMgn000476	11.775
gRNA_31052	BMgn006336	11.766
gRNA_72234	BMgn013762	11.754
gRNA_36602	BMgn007337	11.721
gRNA_44794	BMgn008808	11.704
gRNA_56836	BMgn010975	11.675
gRNA_72289	BMgn013772	11.66
gRNA_29499	BMgn006053	11.643
gRNA_20890	BMgn004488	11.642
gRNA_58739	BMgn011326	11.622
gRNA_61669	BMgn011852	11.571
gRNA_45523	BMgn008932	11.57
gRNA_70941	BMgn013523	11.557
gRNA_8710	BMgn001881	11.553
gRNA_15140	BMgn003273	11.535
gRNA_17608	BMgn003795	11.528
gRNA_70856	BMgn013509	11.526
gRNA_5554	BMgn001206	11.49
gRNA_9938	BMgn002148	11.481
gRNA_81996	BMgn015509	11.456
gRNA_70615	BMgn013468	11.445
gRNA_44111	BMgn008682	11.36
gRNA_43487	BMgn008572	11.355
gRNA_39920	BMgn007929	11.336
gRNA_89605	BMgn016825	11.327
gRNA_66025	BMgn012638	11.322
gRNA_41567	BMgn008232	11.32
gRNA_41328	BMgn008179	11.308
gRNA_85111	BMgn016046	11.299
gRNA_21634	BMgn004628	11.245
gRNA_38609	BMgn007694	11.219
gRNA_26065	BMgn005429	11.197
gRNA_49783	BMgn009707	11.173
gRNA_63099	BMgn012106	11.156
gRNA_362	BMgn000080	11.144
gRNA_60742	BMgn011687	11.139
gRNA_76088	BMgn014483	11.131
gRNA_64074	BMgn012277	11.097
gRNA_6752	BMgn001466	11.092
gRNA_67919	BMgn012985	11.057
gRNA_56283	BMgn010879	11.041
gRNA_16296	BMgn003515	11.039
gRNA_67880	BMgn012979	11.029
gRNA_4665	BMgn001011	11.011
gRNA_5776	BMgn001254	11.01
gRNA_12777	BMgn002763	10.964
gRNA_49886	BMgn009725	10.963
gRNA_41532	BMgn008223	10.957
gRNA_88711	BMgn016668	10.952
gRNA_85339	BMgn016086	10.947
gRNA_63181	BMgn012122	10.945
gRNA_55754	BMgn010783	10.945
gRNA_60216	BMgn011593	10.935
gRNA_42531	BMgn008398	10.933
gRNA_45387	BMgn008910	10.932
gRNA_30064	BMgn006154	10.888
gRNA_29565	BMgn006064	10.866
gRNA_82316	BMgn015564	10.864
gRNA_66541	BMgn012739	10.843
gRNA_32144	BMgn006539	10.84
gRNA_45493	BMgn008927	10.84
gRNA_58130	BMgn011218	10.84
gRNA_7702	BMgn001666	10.84
gRNA_48425	BMgn009466	10.837
gRNA_36682	BMgn007351	10.832
gRNA_14104	BMgn003047	10.828
gRNA_15572	BMgn003364	10.807
gRNA_85271	BMgn016073	10.776
gRNA_46744	BMgn009154	10.736
gRNA_3546	BMgn000769	10.704
gRNA_27607	BMgn005710	10.682
gRNA_36300	BMgn007285	10.68
gRNA_15361	BMgn003319	10.658
gRNA_55935	BMgn010815	10.645
gRNA_84957	BMgn016019	10.629
gRNA_50006	BMgn009745	10.613
gRNA_21229	BMgn004553	10.605
gRNA_90271	BMgn016940	10.602
gRNA_77200	BMgn014691	10.6
gRNA_3359	BMgn000727	10.597
gRNA_85832	BMgn016169	10.589
gRNA_36799	BMgn007378	10.585
gRNA_24538	BMgn005150	10.585
gRNA_6550	BMgn001419	10.579
gRNA_88134	BMgn016569	10.576
gRNA_15299	BMgn003307	10.545
gRNA_42166	BMgn008337	10.513
gRNA_14560	BMgn003147	10.49
gRNA_37595	BMgn007517	10.484
gRNA_5708	BMgn001239	10.482
gRNA_3783	BMgn000823	10.477
gRNA_44027	BMgn008668	10.453
gRNA_73013	BMgn013902	10.441
gRNA_23964	BMgn005042	10.437
gRNA_32818	BMgn006659	10.434
gRNA_84099	BMgn015870	10.43
gRNA_60669	BMgn011675	10.394
gRNA_82308	BMgn015563	10.36
gRNA_72049	BMgn013724	10.356
gRNA_68992	BMgn013182	10.302
gRNA_81498	BMgn015422	10.299
gRNA_6794	BMgn001475	10.261
gRNA_56220	BMgn010866	10.257
gRNA_84104	BMgn015870	10.236
gRNA_27430	BMgn005675	10.22
gRNA_11450	BMgn002485	10.215
gRNA_15108	BMgn003267	10.208
gRNA_10526	BMgn002285	10.169
gRNA_30141	BMgn006168	10.165
gRNA_43981	BMgn008660	10.144
gRNA_79874	BMgn015147	10.09
gRNA_42663	BMgn008423	10.087
gRNA_37066	BMgn007428	10.078
gRNA_23526	BMgn004961	10.069
gRNA_3742	BMgn000814	10.029
gRNA_64428	BMgn012344	10.029
gRNA_72601	BMgn013828	10.028
gRNA_23290	BMgn004922	10.017
gRNA_92984	BMgn017411	10.015
gRNA_6396	BMgn001386	9.9698
gRNA_85600	BMgn016130	9.9664
gRNA_56899	BMgn010987	9.9551
gRNA_62695	BMgn012034	9.9482
gRNA_33205	BMgn006731	9.9279
gRNA_34476	BMgn006958	9.9276
gRNA_56747	BMgn010960	9.8993
gRNA_26081	BMgn005432	9.8877
gRNA_35874	BMgn007211	9.8718
gRNA_4002	BMgn000867	9.8454
gRNA_39193	BMgn007798	9.8213
gRNA_3801	BMgn000827	9.8097
gRNA_66790	BMgn012782	9.8094
gRNA_51318	BMgn009996	9.7888
gRNA_9712	BMgn002100	9.7767
gRNA_70264	BMgn013404	9.7666
gRNA_11544	BMgn002506	9.7666
gRNA_73740	BMgn014040	9.7666
gRNA_55968	BMgn010821	9.7666
gRNA_11649	BMgn002527	9.7666
gRNA_93896	BMgn017575	9.7666
gRNA_23848	BMgn005019	9.7475
gRNA_86473	BMgn016281	9.73
gRNA_48348	BMgn009453	9.7243
gRNA_26753	BMgn005552	9.7218
gRNA_69700	BMgn013304	9.7136
gRNA_32974	BMgn006689	9.7079
gRNA_21612	BMgn004624	9.7017
gRNA_49539	BMgn009662	9.7017
gRNA_40768	BMgn008079	9.7009
gRNA_50235	BMgn009786	9.6927
gRNA_85621	BMgn016134	9.6823
gRNA_86895	BMgn016353	9.6796
gRNA_20885	BMgn004487	9.678
gRNA_50869	BMgn009905	9.6752
gRNA_2795	BMgn000606	9.6708
gRNA_86228	BMgn016238	9.663
gRNA_29610	BMgn006071	9.6563
gRNA_33979	BMgn006868	9.6514
gRNA_51819	BMgn010090	9.6438
gRNA_57986	BMgn011189	9.6389
gRNA_16890	BMgn003644	9.6255
gRNA_79956	BMgn015161	9.607
gRNA_63471	BMgn012172	9.5725
gRNA_4624	BMgn001002	9.5517
gRNA_33022	BMgn006698	9.5494
gRNA_45293	BMgn008894	9.5376
gRNA_53864	BMgn010457	9.5323
gRNA_40510	BMgn008032	9.5176
gRNA_36668	BMgn007348	9.5162
gRNA_15528	BMgn003355	9.5137
gRNA_72895	BMgn013882	9.4981
gRNA_70580	BMgn013462	9.4952
gRNA_89456	BMgn016800	9.484
gRNA_78551	BMgn014921	9.4762
gRNA_78474	BMgn014908	9.4722
gRNA_43640	BMgn008601	9.4689
gRNA_65115	BMgn012474	9.4613
gRNA_73261	BMgn013945	9.4428
gRNA_59870	BMgn011531	9.4424
gRNA_61224	BMgn011773	9.4351
gRNA_65175	BMgn012485	9.4316
gRNA_61421	BMgn011808	9.4266
gRNA_24117	BMgn005069	9.4253
gRNA_52000	BMgn010123	9.4209
gRNA_77307	BMgn014710	9.4194
gRNA_208	BMgn000049	9.3964
gRNA_34620	BMgn006982	9.3917
gRNA_72192	BMgn013755	9.3446
gRNA_562	BMgn000124	9.3367
gRNA_62872	BMgn012067	9.3363
gRNA_46385	BMgn009088	9.3185
gRNA_4879	BMgn001057	9.3128
gRNA_90909	BMgn017051	9.2816
gRNA_53693	BMgn010424	9.2747
gRNA_92919	BMgn017400	9.2706
gRNA_4065	BMgn000879	9.2354
gRNA_36926	BMgn007401	9.2311
gRNA_46656	BMgn009138	9.2311
gRNA_33815	BMgn006839	9.2311
gRNA_26961	BMgn005587	9.2289
gRNA_34090	BMgn006888	9.2207
gRNA_82934	BMgn015670	9.2148
gRNA_84515	BMgn015942	9.2133
gRNA_78874	BMgn014976	9.211
gRNA_89991	BMgn016892	9.1954
gRNA_39695	BMgn007890	9.1913
gRNA_69783	BMgn013319	9.1389
gRNA_62953	BMgn012080	9.1165
gRNA_61541	BMgn011830	9.1127
gRNA_76895	BMgn014639	9.1044
gRNA_66332	BMgn012698	9.1009
gRNA_82336	BMgn015568	9.0916
gRNA_73852	BMgn014058	9.0882
gRNA_51024	BMgn009938	9.0773
gRNA_91912	BMgn017227	9.0608
gRNA_13598	BMgn002936	9.0431
gRNA_49257	BMgn009610	9.017
gRNA_58483	BMgn011279	8.9883
gRNA_71729	BMgn013668	8.9876
gRNA_61542	BMgn011830	8.9874
gRNA_15416	BMgn003331	8.9804
gRNA_89216	BMgn016758	8.9776
gRNA_15148	BMgn003275	8.9654
gRNA_43061	BMgn008496	8.9638
gRNA_87077	BMgn016386	8.9474
gRNA_4235	BMgn000920	8.9448
gRNA_72982	BMgn013897	8.9385
gRNA_15663	BMgn003383	8.9271
gRNA_81466	BMgn015417	8.9212
gRNA_34731	BMgn007001	8.9185
gRNA_87648	BMgn016485	8.9124
gRNA_3455	BMgn000749	8.9097
gRNA_11183	BMgn002426	8.9005
gRNA_80849	BMgn015313	8.8908
gRNA_35040	BMgn007059	8.887
gRNA_79724	BMgn015122	8.882
gRNA_24813	BMgn005204	8.8818
gRNA_37695	BMgn007534	8.8681
gRNA_31395	BMgn006399	8.8595
gRNA_33715	BMgn006822	8.8579
gRNA_90693	BMgn017014	8.8348
gRNA_21877	BMgn004672	8.8258
gRNA_35780	BMgn007193	8.8143
gRNA_24850	BMgn005211	8.8143
gRNA_88149	BMgn016571	8.7892
gRNA_34803	BMgn007015	8.7881
gRNA_4272	BMgn000928	8.7677
gRNA_29646	BMgn006077	8.7609
gRNA_88108	BMgn016565	8.755
gRNA_61213	BMgn011772	8.7517
gRNA_13867	BMgn002996	8.7513
gRNA_16960	BMgn003659	8.7433
gRNA_43397	BMgn008557	8.728
gRNA_76551	BMgn014567	8.7145
gRNA_77840	BMgn014801	8.7135
gRNA_12557	BMgn002717	8.7069
gRNA_87636	BMgn016482	8.6997
gRNA_84318	BMgn015906	8.696
gRNA_64234	BMgn012307	8.6926
gRNA_93833	BMgn017561	8.6926
gRNA_40055	BMgn007951	8.6926
gRNA_51366	BMgn010005	8.6863
gRNA_58437	BMgn011271	8.6862
gRNA_45160	BMgn008871	8.6682
gRNA_43207	BMgn008522	8.6664
gRNA_46347	BMgn009082	8.6554
gRNA_83099	BMgn015698	8.6026
gRNA_78811	BMgn014965	8.6008
gRNA_88494	BMgn016630	8.5946
gRNA_82101	BMgn015527	8.5897
gRNA_12888	BMgn002787	8.5834
gRNA_10769	BMgn002339	8.5833
gRNA_51512	BMgn010032	8.5825
gRNA_19189	BMgn004150	8.5782
gRNA_40537	BMgn008037	8.5781
gRNA_57689	BMgn011129	8.5731
gRNA_55348	BMgn010713	8.5597
gRNA_4348	BMgn000944	8.5532
gRNA_35661	BMgn007170	8.5472
gRNA_84527	BMgn015944	8.5428
gRNA_36735	BMgn007366	8.5411
gRNA_12003	BMgn002603	8.5273
gRNA_27551	BMgn005698	8.5159
gRNA_65431	BMgn012529	8.5065
gRNA_12095	BMgn002622	8.5013
gRNA_72786	BMgn013862	8.4869
gRNA_10627	BMgn002307	8.4851
gRNA_17606	BMgn003795	8.4764
gRNA_48504	BMgn009481	8.4361
gRNA_35442	BMgn007127	8.4326
gRNA_52139	BMgn010147	8.4322
gRNA_85273	BMgn016073	8.4184
gRNA_29884	BMgn006119	8.4112
gRNA_92913	BMgn017399	8.3987
gRNA_37273	BMgn007463	8.3812
gRNA_24784	BMgn005198	8.3763
gRNA_20981	BMgn004505	8.3518
gRNA_82299	BMgn015561	8.3316
gRNA_80544	BMgn015261	8.3211
gRNA_49913	BMgn009730	8.3159
gRNA_59322	BMgn011433	8.3113
gRNA_1265	BMgn000278	8.3073
gRNA_178	BMgn000043	8.2898
gRNA_12648	BMgn002736	8.2752
gRNA_1173	BMgn000258	8.2751
gRNA_38901	BMgn007745	8.2592
gRNA_5382	BMgn001168	8.2512
gRNA_46149	BMgn009047	8.246
gRNA_48402	BMgn009462	8.2294
gRNA_51364	BMgn010005	8.2138
gRNA_44907	BMgn008828	8.21
gRNA_37379	BMgn007481	8.1962
gRNA_71412	BMgn013609	8.1938
gRNA_39756	BMgn007900	8.1925
gRNA_86311	BMgn016252	8.1923
gRNA_2802	BMgn000607	8.1676
gRNA_77811	BMgn014796	8.1658
gRNA_74096	BMgn014102	8.1653
gRNA_62519	BMgn012005	8.1637
gRNA_90111	BMgn016912	8.1572
gRNA_81269	BMgn015384	8.1484
gRNA_11256	BMgn002441	8.1456
gRNA_79245	BMgn015040	8.1392
gRNA_56408	BMgn010901	8.1357
gRNA_58822	BMgn011340	8.1283
gRNA_59588	BMgn011478	8.109
gRNA_8765	BMgn001893	8.0956
gRNA_79793	BMgn015134	8.0896
gRNA_4362	BMgn000946	8.0809
gRNA_59108	BMgn011392	8.0798
gRNA_8092	BMgn001750	8.0765
gRNA_68315	BMgn013062	8.0681
gRNA_33074	BMgn006707	8.0606
gRNA_92672	BMgn017358	8.0569
gRNA_58002	BMgn011192	8.0473
gRNA_49231	BMgn009606	8.0185
gRNA_6841	BMgn001484	8.0159
gRNA_65789	BMgn012599	7.9867
gRNA_35195	BMgn007085	7.9791
gRNA_63282	BMgn012139	7.9789
gRNA_20786	BMgn004469	7.9653
gRNA_59233	BMgn011417	7.9577
gRNA_45661	BMgn008956	7.9567
gRNA_53779	BMgn010439	7.9462
gRNA_88070	BMgn016558	7.9409
gRNA_31899	BMgn006497	7.9326
gRNA_45521	BMgn008932	7.9317
gRNA_45932	BMgn009007	7.9293
gRNA_45659	BMgn008956	7.9201
gRNA_85127	BMgn016049	7.9201
gRNA_71636	BMgn013650	7.9169
gRNA_20012	BMgn004329	7.9151
gRNA_52097	BMgn010140	7.9086
gRNA_47967	BMgn009384	7.9078
gRNA_86252	BMgn016242	7.9047
gRNA_27315	BMgn005655	7.8921
gRNA_65557	BMgn012556	7.8743
gRNA_73408	BMgn013975	7.8713
gRNA_69058	BMgn013194	7.8688
gRNA_57732	BMgn011138	7.8633
gRNA_82627	BMgn015618	7.8582
gRNA_78567	BMgn014924	7.8535
gRNA_88113	BMgn016565	7.8508
gRNA_27816	BMgn005747	7.8448
gRNA_45925	BMgn009005	7.8357
gRNA_83794	BMgn015817	7.8306
gRNA_6170	BMgn001338	7.8279
gRNA_66850	BMgn012792	7.8236
gRNA_69967	BMgn013353	7.8221
gRNA_3564	BMgn000772	7.8179
gRNA_65429	BMgn012529	7.799
gRNA_22323	BMgn004752	7.7926
gRNA_40956	BMgn008113	7.7785
gRNA_11211	BMgn002432	7.7756
gRNA_54631	BMgn010589	7.7736
gRNA_13472	BMgn002909	7.7677
gRNA_60271	BMgn011602	7.7637
gRNA_22341	BMgn004755	7.7479
gRNA_72945	BMgn013890	7.7315
gRNA_34170	BMgn006902	7.7181
gRNA_75466	BMgn014371	7.7057
gRNA_80131	BMgn015191	7.7022
gRNA_70153	BMgn013385	7.699
gRNA_31108	BMgn006345	7.6819
gRNA_1056	BMgn000232	7.6799
gRNA_973	BMgn000215	7.6508
gRNA_53435	BMgn010379	7.6485
gRNA_32611	BMgn006624	7.6424
gRNA_90194	BMgn016927	7.6354
gRNA_80635	BMgn015277	7.6297
gRNA_27212	BMgn005635	7.6187
gRNA_42845	BMgn008455	7.6187
gRNA_12496	BMgn002705	7.6187
gRNA_64446	BMgn012348	7.6187
gRNA_53826	BMgn010450	7.6187
gRNA_93891	BMgn017575	7.6187
gRNA_35464	BMgn007134	7.6124
gRNA_16135	BMgn003481	7.606
gRNA_63891	BMgn012247	7.5984
gRNA_47789	BMgn009350	7.5967
gRNA_34868	BMgn007026	7.5899
gRNA_71696	BMgn013660	7.581
gRNA_67701	BMgn012946	7.5798
gRNA_52225	BMgn010161	7.5784
gRNA_12936	BMgn002797	7.569
gRNA_10807	BMgn002348	7.567
gRNA_9040	BMgn001955	7.5621
gRNA_23859	BMgn005021	7.5523
gRNA_9405	BMgn002033	7.5295
gRNA_59035	BMgn011378	7.5246
gRNA_82309	BMgn015563	7.5225
gRNA_79465	BMgn015077	7.5177
gRNA_53197	BMgn010337	7.5129
gRNA_84599	BMgn015957	7.501
gRNA_84017	BMgn015856	7.4946
gRNA_56311	BMgn010883	7.485
gRNA_45675	BMgn008959	7.4822
gRNA_88145	BMgn016571	7.481
gRNA_16772	BMgn003619	7.469
gRNA_25175	BMgn005268	7.4644
gRNA_78765	BMgn014957	7.4603
gRNA_63400	BMgn012160	7.46
gRNA_67720	BMgn012949	7.4549
gRNA_58939	BMgn011362	7.4518
gRNA_17140	BMgn003697	7.4451
gRNA_59402	BMgn011447	7.4409
gRNA_53716	BMgn010428	7.4313
gRNA_34567	BMgn006973	7.4237
gRNA_43807	BMgn008631	7.4219
gRNA_50926	BMgn009918	7.4214
gRNA_36113	BMgn007254	7.415
gRNA_62367	BMgn011978	7.415
gRNA_88524	BMgn016635	7.4048
gRNA_39640	BMgn007880	7.4029
gRNA_44170	BMgn008691	7.4017
gRNA_91817	BMgn017211	7.3854
gRNA_43462	BMgn008568	7.3791
gRNA_40602	BMgn008050	7.3746
gRNA_38164	BMgn007616	7.3715
gRNA_51986	BMgn010121	7.3601
gRNA_26214	BMgn005455	7.3601
gRNA_90295	BMgn016945	7.3564
gRNA_10465	BMgn002269	7.3364
gRNA_52080	BMgn010137	7.3318
gRNA_77194	BMgn014690	7.3233
gRNA_8556	BMgn001850	7.3166
gRNA_30525	BMgn006238	7.3149
gRNA_50553	BMgn009845	7.3075
gRNA_56608	BMgn010937	7.2975
gRNA_66480	BMgn012725	7.2942
gRNA_73430	BMgn013978	7.2776
gRNA_21932	BMgn004681	7.274
gRNA_30749	BMgn006280	7.265
gRNA_86896	BMgn016353	7.2466
gRNA_40578	BMgn008045	7.2431
gRNA_1762	BMgn000378	7.2352
gRNA_28095	BMgn005798	7.2056
gRNA_88564	BMgn016642	7.2004
gRNA_43672	BMgn008607	7.1996
gRNA_48408	BMgn009463	7.1955
gRNA_14871	BMgn003216	7.1949
gRNA_22242	BMgn004738	7.1942
gRNA_24322	BMgn005112	7.1938
gRNA_10871	BMgn002362	7.1907
gRNA_16632	BMgn003587	7.189
gRNA_63416	BMgn012163	7.1736
gRNA_26585	BMgn005521	7.1686
gRNA_73357	BMgn013962	7.1538
gRNA_10613	BMgn002303	7.1517
gRNA_82383	BMgn015576	7.1517
gRNA_85814	BMgn016166	7.1499
gRNA_76225	BMgn014511	7.1394
gRNA_66386	BMgn012709	7.1222
gRNA_55524	BMgn010743	7.1217
gRNA_75264	BMgn014327	7.1216
gRNA_38568	BMgn007687	7.114
gRNA_12825	BMgn002774	7.1111
gRNA_64906	BMgn012431	7.1056
gRNA_9323	BMgn002015	7.0912
gRNA_25720	BMgn005365	7.0797
gRNA_56356	BMgn010893	7.0773
gRNA_44480	BMgn008747	7.0712
gRNA_36360	BMgn007295	7.0645
gRNA_64062	BMgn012275	7.0642
gRNA_17516	BMgn003775	7.0604
gRNA_2263	BMgn000488	7.0601
gRNA_60396	BMgn011624	7.0579
gRNA_75558	BMgn014388	7.0493
gRNA_36781	BMgn007375	7.0463
gRNA_68786	BMgn013145	7.0459
gRNA_50939	BMgn009920	7.0438
gRNA_70743	BMgn013490	7.0307
gRNA_25647	BMgn005351	7.0293
gRNA_79648	BMgn015110	7.0117
gRNA_69554	BMgn013280	7.0104
gRNA_40826	BMgn008090	7.0041
gRNA_77196	BMgn014691	6.9931
gRNA_16422	BMgn003544	6.9907
gRNA_78157	BMgn014855	6.9907
gRNA_32686	BMgn006637	6.9889
gRNA_82930	BMgn015670	6.9829
gRNA_52683	BMgn010240	6.9795
gRNA_11549	BMgn002507	6.9551
gRNA_49503	BMgn009656	6.9505
gRNA_3230	BMgn000701	6.9457
gRNA_37065	BMgn007428	6.9386
gRNA_14628	BMgn003161	6.9376
gRNA_89171	BMgn016750	6.9359
gRNA_7463	BMgn001618	6.9339
gRNA_84666	BMgn015968	6.9318
gRNA_86520	BMgn016289	6.9278
gRNA_74223	BMgn014124	6.9122
gRNA_71598	BMgn013644	6.8813
gRNA_45894	BMgn008999	6.8371
gRNA_45062	BMgn008855	6.8342
gRNA_34401	BMgn006946	6.8221
gRNA_45353	BMgn008904	6.8201
gRNA_2336	BMgn000502	6.8037
gRNA_58583	BMgn011297	6.8023
gRNA_41546	BMgn008227	6.7981
gRNA_26017	BMgn005418	6.7955
gRNA_37731	BMgn007540	6.793
gRNA_73222	BMgn013939	6.7831
gRNA_73515	BMgn013994	6.7807
gRNA_33913	BMgn006857	6.7698
gRNA_35314	BMgn007105	6.7697
gRNA_68675	BMgn013125	6.7669
gRNA_8863	BMgn001915	6.7646
gRNA_84967	BMgn016021	6.7421
gRNA_78128	BMgn014850	6.7329
gRNA_34972	BMgn007045	6.7316
gRNA_35601	BMgn007157	6.7266
gRNA_92178	BMgn017273	6.7217
gRNA_10566	BMgn002293	6.7209
gRNA_7949	BMgn001719	6.7209
gRNA_83630	BMgn015790	6.7165
gRNA_33484	BMgn006782	6.707
gRNA_27031	BMgn005600	6.7025
gRNA_70586	BMgn013463	6.6942
gRNA_74608	BMgn014200	6.6933
gRNA_90980	BMgn017065	6.6883
gRNA_93923	BMgn017581	6.688
gRNA_56178	BMgn010858	6.6723
gRNA_38350	BMgn007648	6.6614
gRNA_53760	BMgn010436	6.6607
gRNA_16215	BMgn003499	6.6603
gRNA_66028	BMgn012639	6.6603
gRNA_19482	BMgn004216	6.657
gRNA_9656	BMgn002089	6.6549
gRNA_55965	BMgn010820	6.6485
gRNA_68135	BMgn013023	6.6445
gRNA_46538	BMgn009118	6.6428
gRNA_26183	BMgn005450	6.6413
gRNA_26293	BMgn005470	6.6406
gRNA_33096	BMgn006711	6.6346
gRNA_70326	BMgn013414	6.6321
gRNA_4011	BMgn000869	6.6189
gRNA_89603	BMgn016825	6.6171
gRNA_17044	BMgn003676	6.6005
gRNA_70316	BMgn013412	6.5888
gRNA_24837	BMgn005208	6.5854
gRNA_31602	BMgn006444	6.5734
gRNA_34176	BMgn006903	6.5658
gRNA_57528	BMgn011099	6.5634
gRNA_91336	BMgn017125	6.5603
gRNA_74018	BMgn014088	6.5555
gRNA_10232	BMgn002217	6.5448
gRNA_26888	BMgn005575	6.5448
gRNA_22411	BMgn004767	6.5448
gRNA_42826	BMgn008452	6.5444
gRNA_87423	BMgn016446	6.5244
gRNA_30236	BMgn006186	6.5153
gRNA_21779	BMgn004653	6.5088
gRNA_23681	BMgn004987	6.5042
gRNA_16773	BMgn003620	6.493
gRNA_41318	BMgn008177	6.487
gRNA_6657	BMgn001444	6.4835
gRNA_74392	BMgn014156	6.4802
gRNA_24042	BMgn005055	6.4678
gRNA_10653	BMgn002312	6.4619
gRNA_762	BMgn000171	6.4513
gRNA_2469	BMgn000533	6.4435
gRNA_65686	BMgn012580	6.443
gRNA_79351	BMgn015058	6.4379
gRNA_69028	BMgn013189	6.4317
gRNA_24924	BMgn005225	6.4316
gRNA_77481	BMgn014740	6.4282
gRNA_87284	BMgn016422	6.426
gRNA_72897	BMgn013882	6.418
gRNA_2546	BMgn000550	6.4146
gRNA_91600	BMgn017173	6.4134
gRNA_66416	BMgn012714	6.4048
gRNA_39714	BMgn007893	6.4005
gRNA_11873	BMgn002573	6.3926
gRNA_22355	BMgn004757	6.3814
gRNA_5130	BMgn001113	6.3732
gRNA_78179	BMgn014859	6.3695
gRNA_21873	BMgn004671	6.3567
gRNA_61896	BMgn011894	6.353
gRNA_32735	BMgn006645	6.3514
gRNA_17409	BMgn003753	6.3287
gRNA_60943	BMgn011725	6.3283
gRNA_12706	BMgn002748	6.301
gRNA_69485	BMgn013269	6.2912
gRNA_40016	BMgn007945	6.2912
gRNA_59364	BMgn011440	6.2894
gRNA_61774	BMgn011872	6.2807
gRNA_34263	BMgn006920	6.2633
gRNA_68866	BMgn013158	6.2617
gRNA_16620	BMgn003584	6.2589
gRNA_11241	BMgn002438	6.258
gRNA_17904	BMgn003863	6.2501
gRNA_81123	BMgn015359	6.2378
gRNA_73377	BMgn013966	6.2365
gRNA_28816	BMgn005932	6.2341
gRNA_76756	BMgn014613	6.222
gRNA_19129	BMgn004136	6.2132
gRNA_65708	BMgn012584	6.2031
gRNA_60115	BMgn011576	6.1948
gRNA_27879	BMgn005757	6.1912
gRNA_40357	BMgn008007	6.1778
gRNA_57864	BMgn011164	6.1734
gRNA_24581	BMgn005159	6.173
gRNA_43056	BMgn008495	6.1636
gRNA_35523	BMgn007144	6.1614
gRNA_27989	BMgn005776	6.1404
gRNA_16703	BMgn003603	6.1358
gRNA_36466	BMgn007313	6.13
gRNA_12806	BMgn002769	6.1192
gRNA_89248	BMgn016764	6.1155
gRNA_38205	BMgn007623	6.1148
gRNA_34202	BMgn006909	6.1116
gRNA_54350	BMgn010540	6.1054
gRNA_11962	BMgn002593	6.0972
gRNA_71577	BMgn013641	6.0961
gRNA_15009	BMgn003246	6.0929
gRNA_29661	BMgn006080	6.0774
gRNA_20832	BMgn004477	6.074
gRNA_87369	BMgn016437	6.0709
gRNA_93869	BMgn017570	6.0657
gRNA_22228	BMgn004735	6.0623
gRNA_28658	BMgn005904	6.0543
gRNA_46359	BMgn009084	6.0529
gRNA_45608	BMgn008948	6.0393
gRNA_32872	BMgn006670	6.0373
gRNA_64954	BMgn012443	6.0345
gRNA_3012	BMgn000656	6.034
gRNA_88673	BMgn016662	6.0331
gRNA_38442	BMgn007664	6.021
gRNA_5288	BMgn001148	6.0152
gRNA_4121	BMgn000894	6.0119
gRNA_8140	BMgn001760	6.0067
gRNA_52541	BMgn010215	6.0067
gRNA_8493	BMgn001837	6.0028
gRNA_46853	BMgn009176	5.9986
gRNA_39923	BMgn007929	5.9913
gRNA_74272	BMgn014132	5.9844
gRNA_57785	BMgn011148	5.9804
gRNA_80559	BMgn015263	5.9672
gRNA_47162	BMgn009234	5.9669
gRNA_53616	BMgn010410	5.9533
gRNA_59400	BMgn011447	5.9472
gRNA_9258	BMgn001999	5.9422
gRNA_77806	BMgn014795	5.9332
gRNA_23600	BMgn004973	5.9323
gRNA_43111	BMgn008504	5.9221
gRNA_66063	BMgn012646	5.9084
gRNA_75598	BMgn014397	5.9066
gRNA_77805	BMgn014795	5.899
gRNA_85744	BMgn016154	5.8965
gRNA_13077	BMgn002827	5.8946
gRNA_39859	BMgn007919	5.8915
gRNA_33225	BMgn006734	5.8896
gRNA_85643	BMgn016137	5.8856
gRNA_14299	BMgn003089	5.885
gRNA_38994	BMgn007765	5.884
gRNA_66843	BMgn012791	5.8789
gRNA_20835	BMgn004477	5.8741
gRNA_75350	BMgn014345	5.8677
gRNA_47933	BMgn009377	5.8539
gRNA_47774	BMgn009348	5.8536
gRNA_13258	BMgn002864	5.8524
gRNA_56448	BMgn010909	5.8488
gRNA_47977	BMgn009385	5.8477
gRNA_75007	BMgn014274	5.8452
gRNA_62729	BMgn012040	5.8437
gRNA_11257	BMgn002441	5.8428
gRNA_2089	BMgn000451	5.8392
gRNA_44176	BMgn008692	5.8349
gRNA_67712	BMgn012948	5.8317
gRNA_26181	BMgn005450	5.8297
gRNA_16785	BMgn003622	5.8048
gRNA_81565	BMgn015434	5.7939
gRNA_42773	BMgn008442	5.7927
gRNA_648	BMgn000147	5.7725
gRNA_56765	BMgn010963	5.7709
gRNA_6448	BMgn001398	5.7619
gRNA_67658	BMgn012939	5.7427
gRNA_87428	BMgn016447	5.7302
gRNA_89549	BMgn016816	5.7256
gRNA_2664	BMgn000575	5.7194
gRNA_50952	BMgn009922	5.7161
gRNA_25480	BMgn005322	5.7148
gRNA_35138	BMgn007075	5.714
gRNA_23723	BMgn004994	5.698
gRNA_68077	BMgn013014	5.6979
gRNA_19837	BMgn004294	5.695
gRNA_31441	BMgn006407	5.6948
gRNA_406	BMgn000089	5.6946
gRNA_28121	BMgn005804	5.6909
gRNA_6217	BMgn001348	5.6894
gRNA_66121	BMgn012655	5.6824
gRNA_55792	BMgn010790	5.6793
gRNA_34773	BMgn007008	5.6737
gRNA_79944	BMgn015159	5.6737
gRNA_11903	BMgn002582	5.6696
gRNA_88292	BMgn016596	5.661
gRNA_49474	BMgn009651	5.6609
gRNA_61627	BMgn011845	5.6571
gRNA_55585	BMgn010754	5.6523
gRNA_20318	BMgn004385	5.6485
gRNA_21496	BMgn004603	5.6476
gRNA_33072	BMgn006707	5.6462
gRNA_81126	BMgn015359	5.6379
gRNA_38115	BMgn007608	5.6332
gRNA_26992	BMgn005592	5.6258
gRNA_66147	BMgn012660	5.6208
gRNA_69820	BMgn013326	5.6144
gRNA_71937	BMgn013706	5.6092
gRNA_31554	BMgn006435	5.6025
gRNA_41109	BMgn008141	5.6005
gRNA_75802	BMgn014433	5.5886
gRNA_72539	BMgn013818	5.5744
gRNA_85846	BMgn016171	5.5666
gRNA_53622	BMgn010411	5.5641
gRNA_24665	BMgn005173	5.5562
gRNA_51685	BMgn010064	5.5524
gRNA_88045	BMgn016554	5.552
gRNA_30313	BMgn006201	5.5455
gRNA_62935	BMgn012077	5.5387
gRNA_74649	BMgn014208	5.5329
gRNA_49110	BMgn009586	5.5221
gRNA_46148	BMgn009047	5.5221
gRNA_61523	BMgn011826	5.5207
gRNA_765	BMgn000172	5.5156
gRNA_60802	BMgn011697	5.5127
gRNA_82901	BMgn015665	5.505
gRNA_73300	BMgn013952	5.5035
gRNA_22509	BMgn004784	5.4956
gRNA_85757	BMgn016156	5.4956
gRNA_50458	BMgn009826	5.4929
gRNA_11357	BMgn002462	5.4879
gRNA_52726	BMgn010250	5.4708
gRNA_18447	BMgn003986	5.4708
gRNA_46506	BMgn009113	5.4708
gRNA_73234	BMgn013941	5.4708
gRNA_34241	BMgn006916	5.4708
gRNA_90600	BMgn016999	5.4708
gRNA_90605	BMgn017000	5.4708
gRNA_57747	BMgn011141	5.469
gRNA_3171	BMgn000689	5.4684
gRNA_92841	BMgn017387	5.4641
gRNA_10228	BMgn002216	5.4626
gRNA_30269	BMgn006193	5.4582
gRNA_12989	BMgn002810	5.455
gRNA_28361	BMgn005847	5.448
gRNA_8613	BMgn001861	5.4472
gRNA_1347	BMgn000294	5.4425
gRNA_49929	BMgn009732	5.439
gRNA_80871	BMgn015316	5.4359
gRNA_41642	BMgn008245	5.426
gRNA_40130	BMgn007966	5.4258
gRNA_21392	BMgn004582	5.4225
gRNA_34937	BMgn007039	5.4207
gRNA_83863	BMgn015829	5.4187
gRNA_56937	BMgn010993	5.4174
gRNA_81874	BMgn015488	5.4084
gRNA_77807	BMgn014795	5.3987
gRNA_65433	BMgn012530	5.398
gRNA_19421	BMgn004203	5.3963
gRNA_64312	BMgn012323	5.3944
gRNA_26701	BMgn005544	5.3879
gRNA_17960	BMgn003879	5.3703
gRNA_938	BMgn000207	5.3577
gRNA_49393	BMgn009636	5.3569
gRNA_10	BMgn000002	5.3552
gRNA_93921	BMgn017581	5.3547
gRNA_19020	BMgn004112	5.3518
gRNA_88060	BMgn016557	5.3516
gRNA_64588	BMgn012374	5.3515
gRNA_42558	BMgn008404	5.3509
gRNA_65106	BMgn012472	5.3494
gRNA_56423	BMgn010905	5.3494
gRNA_17494	BMgn003771	5.3461
gRNA_91915	BMgn017228	5.3444
gRNA_86446	BMgn016277	5.3358
gRNA_53292	BMgn010355	5.3226
gRNA_79890	BMgn015150	5.3226
gRNA_68384	BMgn013074	5.3138
gRNA_81505	BMgn015423	5.311
gRNA_4425	BMgn000961	5.3074
gRNA_61262	BMgn011780	5.3071
gRNA_19371	BMgn004192	5.3061
gRNA_89509	BMgn016809	5.3033
gRNA_46153	BMgn009047	5.3029
gRNA_83815	BMgn015821	5.3017
gRNA_55794	BMgn010790	5.296
gRNA_83364	BMgn015743	5.296
gRNA_90149	BMgn016919	5.2922
gRNA_84514	BMgn015942	5.2922
gRNA_86787	BMgn016335	5.2898
gRNA_88562	BMgn016642	5.282
gRNA_26983	BMgn005591	5.2813
gRNA_84272	BMgn015898	5.2806
gRNA_68225	BMgn013040	5.2787
gRNA_44821	BMgn008812	5.2766
gRNA_72017	BMgn013719	5.2736
gRNA_14964	BMgn003237	5.2729
gRNA_86629	BMgn016307	5.27
gRNA_6304	BMgn001367	5.2695
gRNA_81597	BMgn015439	5.2618
gRNA_18842	BMgn004071	5.2519
gRNA_75001	BMgn014273	5.2485
gRNA_47096	BMgn009222	5.2442
gRNA_50967	BMgn009925	5.2427
gRNA_85201	BMgn016061	5.2416
gRNA_76635	BMgn014591	5.2302
gRNA_40639	BMgn008057	5.2285
gRNA_45495	BMgn008928	5.2284
gRNA_76625	BMgn014589	5.2219
gRNA_59819	BMgn011523	5.2217
gRNA_69349	BMgn013245	5.2157
gRNA_78456	BMgn014905	5.2084
gRNA_75187	BMgn014312	5.2064
gRNA_28040	BMgn005787	5.2057
gRNA_68260	BMgn013052	5.2051
gRNA_91080	BMgn017082	5.2049
gRNA_68552	BMgn013105	5.2041
gRNA_39080	BMgn007780	5.1951
gRNA_1692	BMgn000364	5.1924
gRNA_55601	BMgn010756	5.1906
gRNA_13650	BMgn002947	5.1901
gRNA_16264	BMgn003509	5.1834
gRNA_39679	BMgn007886	5.1772
gRNA_68301	BMgn013059	5.1766
gRNA_48273	BMgn009440	5.1744
gRNA_37746	BMgn007542	5.1738
gRNA_26408	BMgn005489	5.16
gRNA_50849	BMgn009902	5.1584
gRNA_52665	BMgn010236	5.1577
gRNA_63363	BMgn012153	5.1564
gRNA_20753	BMgn004464	5.1482
gRNA_53933	BMgn010470	5.1454
gRNA_32278	BMgn006563	5.1406
gRNA_79968	BMgn015163	5.1379
gRNA_70653	BMgn013474	5.1351
gRNA_37292	BMgn007467	5.1351
gRNA_78064	BMgn014839	5.1345
gRNA_60457	BMgn011636	5.1301
gRNA_42202	BMgn008343	5.1208
gRNA_37356	BMgn007477	5.1208
gRNA_74687	BMgn014215	5.1198
gRNA_64687	BMgn012391	5.1115
gRNA_4513	BMgn000979	5.1104
gRNA_17752	BMgn003826	5.1059
gRNA_86815	BMgn016340	5.1056
gRNA_42641	BMgn008419	5.102
gRNA_28865	BMgn005940	5.1006
gRNA_13089	BMgn002830	5.0912
gRNA_64593	BMgn012374	5.0783
gRNA_23954	BMgn005040	5.0748
gRNA_32223	BMgn006554	5.0738
gRNA_18830	BMgn004069	5.0727
gRNA_36747	BMgn007368	5.0691
gRNA_64521	BMgn012362	5.0685
gRNA_90910	BMgn017051	5.0651
gRNA_10470	BMgn002270	5.0641
gRNA_15034	BMgn003251	5.064
gRNA_80134	BMgn015192	5.0637
gRNA_11267	BMgn002443	5.0634
gRNA_49635	BMgn009680	5.0634
gRNA_50072	BMgn009756	5.0623
gRNA_21714	BMgn004642	5.0472
gRNA_11033	BMgn002394	5.0453
gRNA_55192	BMgn010685	5.0376
gRNA_61065	BMgn011746	5.0371
gRNA_51412	BMgn010013	5.035
gRNA_15393	BMgn003327	5.0309
gRNA_51099	BMgn009953	5.0304
gRNA_25032	BMgn005244	5.0283
gRNA_55011	BMgn010654	5.0283
gRNA_87302	BMgn016426	5.026
gRNA_19015	BMgn004111	5.026
gRNA_28764	BMgn005922	5.0242
gRNA_89369	BMgn016785	5.0205
gRNA_28015	BMgn005782	5.0104
gRNA_12664	BMgn002739	5.01
gRNA_30380	BMgn006212	5.0066
gRNA_1930	BMgn000417	5.0055
gRNA_4187	BMgn000910	4.9973
gRNA_87796	BMgn016509	4.9953
gRNA_14063	BMgn003039	4.9908
gRNA_53261	BMgn010350	4.9896
gRNA_19101	BMgn004129	4.9881
gRNA_4082	BMgn000883	4.9835
gRNA_31136	BMgn006350	4.9799
gRNA_78533	BMgn014918	4.9797
gRNA_20768	BMgn004466	4.9789
gRNA_18848	BMgn004072	4.9776
gRNA_65473	BMgn012537	4.9734
gRNA_12323	BMgn002669	4.9687
gRNA_41797	BMgn008271	4.9671
gRNA_65271	BMgn012501	4.9655
gRNA_9733	BMgn002104	4.9648
gRNA_85676	BMgn016143	4.9646
gRNA_48832	BMgn009537	4.9624
gRNA_35583	BMgn007154	4.96
gRNA_28995	BMgn005964	4.9581
gRNA_83336	BMgn015739	4.957
gRNA_40723	BMgn008071	4.9537
gRNA_47712	BMgn009338	4.952
gRNA_30480	BMgn006231	4.9471
gRNA_73365	BMgn013963	4.9471
gRNA_59678	BMgn011495	4.9434
gRNA_20830	BMgn004477	4.9413
gRNA_55929	BMgn010814	4.9401
gRNA_62301	BMgn011966	4.9381
gRNA_25927	BMgn005402	4.931
gRNA_10785	BMgn002344	4.9245
gRNA_17836	BMgn003848	4.9203
gRNA_34444	BMgn006953	4.9181
gRNA_70536	BMgn013454	4.9175
gRNA_2574	BMgn000557	4.917
gRNA_37996	BMgn007588	4.9148
gRNA_28731	BMgn005917	4.9131
gRNA_93007	BMgn017414	4.9109
gRNA_57653	BMgn011123	4.9085
gRNA_84507	BMgn015941	4.907
gRNA_48831	BMgn009537	4.9051
gRNA_52521	BMgn010211	4.9037
gRNA_11916	BMgn002584	4.9032
gRNA_86844	BMgn016345	4.8989
gRNA_36047	BMgn007242	4.8989
gRNA_10252	BMgn002221	4.8923
gRNA_12155	BMgn002634	4.8908
gRNA_72046	BMgn013724	4.8706
gRNA_27535	BMgn005696	4.8663
gRNA_57373	BMgn011071	4.8658
gRNA_42818	BMgn008449	4.8651
gRNA_71823	BMgn013687	4.8643
gRNA_58098	BMgn011211	4.8624
gRNA_31231	BMgn006367	4.8617
gRNA_7340	BMgn001590	4.8587
gRNA_42077	BMgn008321	4.8517
gRNA_63949	BMgn012257	4.8346
gRNA_16706	BMgn003603	4.8318
gRNA_48302	BMgn009445	4.8314
gRNA_63953	BMgn012257	4.8262
gRNA_50962	BMgn009924	4.826
gRNA_68164	BMgn013028	4.8232
gRNA_6984	BMgn001513	4.8225
gRNA_30491	BMgn006232	4.822
gRNA_62394	BMgn011982	4.8216
gRNA_46088	BMgn009035	4.819
gRNA_21218	BMgn004550	4.8153
gRNA_84606	BMgn015958	4.8129
gRNA_41141	BMgn008146	4.808
gRNA_11261	BMgn002442	4.8063
gRNA_3446	BMgn000748	4.8027
gRNA_25889	BMgn005396	4.8016
gRNA_7794	BMgn001687	4.8003
gRNA_1542	BMgn000334	4.7941
gRNA_56304	BMgn010882	4.7913
gRNA_40240	BMgn007986	4.7905
gRNA_45433	BMgn008917	4.7889
gRNA_7750	BMgn001678	4.7852
gRNA_54216	BMgn010518	4.7846
gRNA_52930	BMgn010287	4.7844
gRNA_49306	BMgn009620	4.7827
gRNA_20991	BMgn004506	4.7817
gRNA_17386	BMgn003748	4.7653
gRNA_19724	BMgn004271	4.7653
gRNA_86209	BMgn016235	4.7652
gRNA_25670	BMgn005356	4.7647
gRNA_59167	BMgn011405	4.7603
gRNA_36671	BMgn007349	4.7585
gRNA_75829	BMgn014438	4.7571
gRNA_67815	BMgn012967	4.7557
gRNA_15154	BMgn003276	4.75
gRNA_69622	BMgn013291	4.7498
gRNA_62438	BMgn011991	4.7336
gRNA_52025	BMgn010128	4.7318
gRNA_42003	BMgn008307	4.7301
gRNA_79914	BMgn015154	4.729
gRNA_19516	BMgn004223	4.723
gRNA_16140	BMgn003482	4.7226
gRNA_6117	BMgn001327	4.7193
gRNA_41799	BMgn008271	4.7159
gRNA_13161	BMgn002845	4.7157
gRNA_8740	BMgn001888	4.7121
gRNA_7821	BMgn001693	4.711
gRNA_90244	BMgn016936	4.707
gRNA_3935	BMgn000853	4.7063
gRNA_36597	BMgn007337	4.7019
gRNA_1198	BMgn000263	4.7013
gRNA_86090	BMgn016214	4.6932
gRNA_9107	BMgn001969	4.6891
gRNA_83669	BMgn015796	4.6871
gRNA_17593	BMgn003791	4.6776
gRNA_91809	BMgn017209	4.6764
gRNA_90905	BMgn017051	4.6764
gRNA_92394	BMgn017309	4.6743
gRNA_62435	BMgn011990	4.6736
gRNA_44775	BMgn008805	4.6712
gRNA_49745	BMgn009701	4.6647
gRNA_65790	BMgn012599	4.6632
gRNA_54921	BMgn010639	4.6625
gRNA_49440	BMgn009645	4.6588
gRNA_40370	BMgn008009	4.6572
gRNA_81425	BMgn015410	4.657
gRNA_60905	BMgn011719	4.6461
gRNA_21022	BMgn004512	4.6438
gRNA_3930	BMgn000852	4.6403
gRNA_30483	BMgn006231	4.6399
gRNA_80522	BMgn015257	4.6395
gRNA_31833	BMgn006484	4.6388
gRNA_46231	BMgn009061	4.6365
gRNA_2715	BMgn000587	4.6342
gRNA_71083	BMgn013548	4.6266
gRNA_19201	BMgn004152	4.6243
gRNA_46903	BMgn009184	4.6145
gRNA_93444	BMgn017491	4.6114
gRNA_73698	BMgn014033	4.6107
gRNA_47541	BMgn009306	4.6053
gRNA_44966	BMgn008839	4.5959
gRNA_16646	BMgn003589	4.5873
gRNA_6190	BMgn001342	4.5842
gRNA_41649	BMgn008246	4.5826
gRNA_66624	BMgn012753	4.5801
gRNA_16287	BMgn003514	4.5795
gRNA_89791	BMgn016858	4.5767
gRNA_53010	BMgn010301	4.5709
gRNA_36171	BMgn007264	4.5691
gRNA_29850	BMgn006114	4.5674
gRNA_50661	BMgn009865	4.5623
gRNA_27632	BMgn005714	4.5543
gRNA_1793	BMgn000385	4.5541
gRNA_58089	BMgn011209	4.5424
gRNA_84557	BMgn015950	4.5418
gRNA_75346	BMgn014343	4.5385
gRNA_43399	BMgn008557	4.5384
gRNA_63334	BMgn012148	4.53
gRNA_18268	BMgn003946	4.5275
gRNA_90296	BMgn016946	4.5253
gRNA_16626	BMgn003585	4.5206
gRNA_50198	BMgn009779	4.5195
gRNA_52902	BMgn010282	4.5182
gRNA_3790	BMgn000824	4.5152
gRNA_43122	BMgn008506	4.5151
gRNA_55466	BMgn010734	4.5149
gRNA_33583	BMgn006799	4.5096
gRNA_55694	BMgn010773	4.5082
gRNA_87306	BMgn016426	4.5068
gRNA_81444	BMgn015413	4.5054
gRNA_83854	BMgn015827	4.5047
gRNA_57389	BMgn011074	4.5041
gRNA_20216	BMgn004368	4.4906
gRNA_41426	BMgn008200	4.4855
gRNA_6982	BMgn001513	4.482
gRNA_75078	BMgn014287	4.4774
gRNA_15151	BMgn003275	4.4768
gRNA_72606	BMgn013829	4.4767
gRNA_87563	BMgn016470	4.4745
gRNA_23134	BMgn004894	4.4726
gRNA_93705	BMgn017539	4.4685
gRNA_47591	BMgn009316	4.4679
gRNA_20833	BMgn004477	4.4656
gRNA_59213	BMgn011413	4.4655
gRNA_19964	BMgn004319	4.4654
gRNA_8883	BMgn001919	4.4644
gRNA_57520	BMgn011097	4.4644
gRNA_23908	BMgn005030	4.4641
gRNA_30670	BMgn006266	4.4622
gRNA_59276	BMgn011425	4.4598
gRNA_46549	BMgn009120	4.4597
gRNA_69386	BMgn013251	4.4544
gRNA_53505	BMgn010391	4.4473
gRNA_92136	BMgn017266	4.4466
gRNA_36586	BMgn007335	4.446
gRNA_92419	BMgn017314	4.4441
gRNA_92180	BMgn017273	4.4392
gRNA_79936	BMgn015158	4.437
gRNA_68812	BMgn013149	4.4293
gRNA_33867	BMgn006848	4.4261
gRNA_55562	BMgn010750	4.4255
gRNA_23450	BMgn004948	4.4249
gRNA_65088	BMgn012469	4.4225
gRNA_85039	BMgn016033	4.4215
gRNA_63970	BMgn012260	4.4205
gRNA_51018	BMgn009937	4.4121
gRNA_80353	BMgn015229	4.4119
gRNA_18661	BMgn004032	4.4059
gRNA_42230	BMgn008348	4.4056
gRNA_67062	BMgn012836	4.4044
gRNA_49233	BMgn009606	4.4041
gRNA_53992	BMgn010480	4.4
gRNA_9087	BMgn001965	4.3983
gRNA_114	BMgn000028	4.3969
gRNA_70902	BMgn013517	4.3969
gRNA_68893	BMgn013164	4.3944
gRNA_55911	BMgn010811	4.3912
gRNA_46151	BMgn009047	4.3891
gRNA_64753	BMgn012403	4.3852
gRNA_24709	BMgn005183	4.3814
gRNA_47690	BMgn009334	4.3814
gRNA_78727	BMgn014951	4.3754
gRNA_31480	BMgn006415	4.3749
gRNA_58849	BMgn011345	4.3676
gRNA_40268	BMgn007991	4.3663
gRNA_89380	BMgn016787	4.3598
gRNA_21595	BMgn004622	4.3585
gRNA_47338	BMgn009269	4.3551
gRNA_623	BMgn000139	4.3484
gRNA_50617	BMgn009856	4.3471
gRNA_77968	BMgn014823	4.3436
gRNA_7491	BMgn001623	4.3393
gRNA_53378	BMgn010369	4.3314
gRNA_30773	BMgn006284	4.3276
gRNA_86636	BMgn016309	4.3252
gRNA_78733	BMgn014952	4.3213
gRNA_57821	BMgn011154	4.3142
gRNA_39354	BMgn007826	4.3135
gRNA_20577	BMgn004430	4.31
gRNA_29710	BMgn006088	4.308
gRNA_9426	BMgn002038	4.3021
gRNA_74004	BMgn014084	4.3007
gRNA_73422	BMgn013977	4.2991
gRNA_38447	BMgn007666	4.2972
gRNA_83951	BMgn015844	4.2969
gRNA_49255	BMgn009610	4.2945
gRNA_51575	BMgn010044	4.2905
gRNA_48654	BMgn009506	4.2882
gRNA_54545	BMgn010573	4.2859
gRNA_53360	BMgn010366	4.2844
gRNA_675	BMgn000153	4.2792
gRNA_8058	BMgn001743	4.2775
gRNA_50496	BMgn009832	4.2751
gRNA_32057	BMgn006523	4.2716
gRNA_27091	BMgn005612	4.2696
gRNA_303	BMgn000068	4.2679
gRNA_74902	BMgn014255	4.2646
gRNA_64144	BMgn012290	4.2574
gRNA_77178	BMgn014688	4.257
gRNA_65573	BMgn012559	4.2559
gRNA_573	BMgn000126	4.2507
gRNA_92043	BMgn017250	4.2492
gRNA_86785	BMgn016335	4.2475
gRNA_89205	BMgn016756	4.2428
gRNA_23731	BMgn004995	4.242
gRNA_8619	BMgn001862	4.2401
gRNA_37755	BMgn007544	4.2368
gRNA_814	BMgn000181	4.2365
gRNA_25948	BMgn005406	4.2356
gRNA_61524	BMgn011826	4.2319
gRNA_43059	BMgn008495	4.2303
gRNA_16222	BMgn003501	4.2294
gRNA_48871	BMgn009544	4.2264
gRNA_4957	BMgn001073	4.2243
gRNA_27602	BMgn005707	4.2231
gRNA_24713	BMgn005183	4.2225
gRNA_69210	BMgn013221	4.2181
gRNA_7518	BMgn001629	4.2155
gRNA_7457	BMgn001616	4.215
gRNA_68072	BMgn013013	4.2129
gRNA_7480	BMgn001621	4.2125
gRNA_86409	BMgn016271	4.2053
gRNA_1632	BMgn000352	4.2044
gRNA_87239	BMgn016414	4.2043
gRNA_40462	BMgn008024	4.2043
gRNA_93879	BMgn017573	4.198
gRNA_37922	BMgn007576	4.1938
gRNA_25235	BMgn005278	4.1871
gRNA_43104	BMgn008503	4.1861
gRNA_15851	BMgn003422	4.1861
gRNA_91285	BMgn017116	4.185
gRNA_31418	BMgn006403	4.1831
gRNA_23408	BMgn004941	4.1819
gRNA_41165	BMgn008150	4.1798
gRNA_92537	BMgn017335	4.1798
gRNA_53241	BMgn010346	4.1778
gRNA_63151	BMgn012117	4.1734
gRNA_77722	BMgn014781	4.1708
gRNA_16350	BMgn003527	4.1547
gRNA_67443	BMgn012899	4.1513
gRNA_79252	BMgn015041	4.1505
gRNA_25191	BMgn005271	4.1493
gRNA_25286	BMgn005287	4.1482
gRNA_89783	BMgn016857	4.1368
gRNA_17817	BMgn003842	4.1344
gRNA_41072	BMgn008135	4.1335
gRNA_4649	BMgn001007	4.1276
gRNA_7784	BMgn001685	4.1273
gRNA_49443	BMgn009645	4.1219
gRNA_39830	BMgn007914	4.1213
gRNA_90586	BMgn016997	4.1185
gRNA_30445	BMgn006224	4.1083
gRNA_47976	BMgn009385	4.0909
gRNA_64287	BMgn012319	4.0905
gRNA_2750	BMgn000594	4.0893
gRNA_44355	BMgn008725	4.0885
gRNA_28129	BMgn005806	4.0884
gRNA_93140	BMgn017437	4.0755
gRNA_71012	BMgn013536	4.0748
gRNA_77890	BMgn014809	4.0696
gRNA_20123	BMgn004351	4.069
gRNA_18130	BMgn003917	4.064
gRNA_32608	BMgn006624	4.0597
gRNA_62415	BMgn011986	4.0593
gRNA_44366	BMgn008726	4.0593
gRNA_47412	BMgn009284	4.0572
gRNA_15658	BMgn003382	4.0538
gRNA_22373	BMgn004760	4.0518
gRNA_34447	BMgn006953	4.0469
gRNA_24014	BMgn005050	4.0448
gRNA_42764	BMgn008440	4.0385
gRNA_56960	BMgn010997	4.0364
gRNA_93906	BMgn017577	4.036
gRNA_63252	BMgn012134	4.0346
gRNA_432	BMgn000095	4.0337
gRNA_16787	BMgn003622	4.0334
gRNA_41450	BMgn008204	4.0334
gRNA_14171	BMgn003061	4.0333
gRNA_59902	BMgn011537	4.0332
gRNA_81841	BMgn015483	4.0293
gRNA_88573	BMgn016644	4.0288
gRNA_59039	BMgn011379	4.0286
gRNA_23800	BMgn005011	4.0246
gRNA_49788	BMgn009708	4.021
gRNA_75031	BMgn014278	4.02
gRNA_35278	BMgn007099	4.0154
gRNA_39252	BMgn007808	4.0137
gRNA_30588	BMgn006249	4.004
gRNA_87652	BMgn016485	4.0031
gRNA_9263	BMgn002000	4.0009
gRNA_33673	BMgn006814	3.9991
gRNA_36071	BMgn007246	3.9951
gRNA_13804	BMgn002982	3.9929
gRNA_38599	BMgn007692	3.9927
gRNA_4238	BMgn000921	3.9872
gRNA_20881	BMgn004486	3.9859
gRNA_33492	BMgn006783	3.9859
gRNA_76283	BMgn014521	3.9842
gRNA_48625	BMgn009501	3.9765
gRNA_14522	BMgn003140	3.9747
gRNA_75653	BMgn014406	3.9653
gRNA_14847	BMgn003211	3.9614
gRNA_1190	BMgn000261	3.9614
gRNA_71538	BMgn013633	3.9612
gRNA_90712	BMgn017018	3.9543
gRNA_49522	BMgn009660	3.9527
gRNA_9489	BMgn002052	3.9472
gRNA_23659	BMgn004983	3.9446
gRNA_31314	BMgn006382	3.9421
gRNA_78973	BMgn014995	3.9397
gRNA_42258	BMgn008353	3.9372
gRNA_51605	BMgn010050	3.9364
gRNA_37198	BMgn007450	3.9339
gRNA_59159	BMgn011403	3.9317
gRNA_33739	BMgn006826	3.9306
gRNA_69853	BMgn013332	3.9291
gRNA_84844	BMgn015999	3.9285
gRNA_82592	BMgn015612	3.9237
gRNA_92829	BMgn017385	3.9228
gRNA_86965	BMgn016366	3.9185
gRNA_31976	BMgn006510	3.9162
gRNA_8098	BMgn001751	3.916
gRNA_66490	BMgn012727	3.914
gRNA_84415	BMgn015924	3.9131
gRNA_26868	BMgn005572	3.9104
gRNA_67449	BMgn012902	3.9084
[truncated: 92,001 more rows]

## Sheet: anti-BmNPV genes reported
Gene ID	Symbol	neg|score	neg|p-value	neg|rank
BMgn005506	Ptgr1	0.00093044	0.0033674	31
BMgn004527	ST2-2	0.0037495	0.007174	137
BMgn005406	AK	0.0043043	0.01269	160
BMgn003225	AaeL	0.016964	0.031485	515
BMgn011000	ACY1	0.02135	0.044064	638
BMgn004538	ST2-3	0.030937	0.030846	858
BMgn002852	ST3	0.044147	0.044116	1123
BMgn004508	ST2-1	0.046812	0.046822	1174

## Sheet: sgRNA score in Phagosome
Symbol	sgRNA ID	Gene ID	score
v-ATPase-a	gRNA_11705	BMgn002538	142.93
v-ATPase-H-1	gRNA_77006	BMgn014658	120.76
TUBB-1	gRNA_46615	BMgn009131	62.435
v-ATPase-S2	gRNA_75638	BMgn014403	62.389
Rac	gRNA_35346	BMgn007110	44.92
Sec61-β	gRNA_30362	BMgn006209	35.076
TUBB-2	gRNA_88908	BMgn016704	19.941
Sec61-a	gRNA_66275	BMgn012687	17.494
RAB6	gRNA_29460	BMgn006045	17.284
v-ATPase-A	gRNA_41941	BMgn008295	12.526
v-ATPase-116 kDa-2	gRNA_11211	BMgn002432	7.7756
PIKFYVE	gRNA_60271	BMgn011602	7.7637
TUBA	gRNA_21932	BMgn004681	7.274
VPS35	gRNA_35601	BMgn007157	6.7266
v-ATPase-C	gRNA_73365	BMgn013963	4.9471
v-ATPase-116 kDa-1	gRNA_2270	BMgn000489	3.6719
TUBA	gRNA_21930	BMgn004681	3.073
NOS	gRNA_13603	BMgn002938	2.6912
v-ATPase-F	gRNA_40380	BMgn008011	2.3705
cathepsin	gRNA_58832	BMgn011342	2.3668
Sec61-β	gRNA_30360	BMgn006209	2.2573
LAMP	gRNA_29563	BMgn006063	2.2193
v-ATPase-H-1	gRNA_77004	BMgn014658	2.1931
v-ATPase-C	gRNA_73364	BMgn013963	2.1605
v-ATPase-116 kDa-3	gRNA_40429	BMgn008019	1.9746
Hrs	gRNA_34914	BMgn007035	1.9495
v-ATPase-B	gRNA_10344	BMgn002241	1.9253
cathepsin	gRNA_58830	BMgn011342	1.8534
Dynein-3	gRNA_4201	BMgn000913	1.8416
TUBB-1	gRNA_46616	BMgn009131	1.7905
v-ATPase-16 kDa	gRNA_6004	BMgn001302	1.7525
LAMP	gRNA_29562	BMgn006063	1.7424
v-ATPase-a	gRNA_11708	BMgn002538	1.7234
Rac	gRNA_35349	BMgn007110	1.6256
v-ATPase-116 kDa-3	gRNA_40430	BMgn008019	1.6189
v-ATPase-116 kDa-1	gRNA_2269	BMgn000489	1.6105
TUBA	gRNA_21928	BMgn004681	1.5683
v-ATPase-B	gRNA_10345	BMgn002241	1.5683
v-ATPase-21 kDa-2	gRNA_1048	BMgn000231	1.498
v-ATPase-H-2	gRNA_45207	BMgn008879	1.4659
Dynein-5	gRNA_10939	BMgn002375	1.4606
v-ATPase-D4	gRNA_7350	BMgn001592	1.4507
cathepsin	gRNA_58831	BMgn011342	1.4398
v-ATPase-H-1	gRNA_77001	BMgn014658	1.4199
v-ATPase-F	gRNA_40383	BMgn008011	1.4196
LAMP	gRNA_29564	BMgn006063	1.4134
v-ATPase-116 kDa-1	gRNA_2267	BMgn000489	1.3727
VPS36	gRNA_35602	BMgn007157	1.3694
TUBB-2	gRNA_88909	BMgn016704	1.3514
Dynein-2	gRNA_10935	BMgn002375	1.3261
cathepsin	gRNA_58833	BMgn011342	1.3045
Sec61-β	gRNA_30365	BMgn006209	1.2855
v-ATPase-S2	gRNA_11341	BMgn002459	1.2834
v-ATPase-22 kDa-1	gRNA_89427	BMgn016795	1.266
v-ATPase-22 kDa-1	gRNA_89430	BMgn016795	1.2205
LAMP	gRNA_29560	BMgn006063	1.1755
v-ATPase-22 kDa-1	gRNA_89426	BMgn016795	1.1737
Dynein-4	gRNA_10938	BMgn002375	1.1512
cathepsin	gRNA_58834	BMgn011342	1.1484
v-ATPase-H-2	gRNA_45211	BMgn008879	1.1484
v-ATPase-G	gRNA_71769	BMgn013678	1.1231
v-ATPase-116 kDa-2	gRNA_11212	BMgn002432	1.0791
v-ATPase-B	gRNA_10348	BMgn002241	1.057
v-ATPase-16 kDa	gRNA_6005	BMgn001302	1.057
v-ATPase-D-3	gRNA_14777	BMgn003196	1.0351
v-ATPase-16 kDa	gRNA_6002	BMgn001302	1.0234
v-ATPase-D-2	gRNA_43317	BMgn008542	0.98933
v-ATPase-16 kDa	gRNA_6006	BMgn001302	0.95073
v-ATPase-H-1	gRNA_77005	BMgn014658	0.9204
v-ATPase-C	gRNA_73361	BMgn013963	0.91257
v-ATPase-D-1	gRNA_49576	BMgn009669	0.87642
v-ATPase-21 kDa-2	gRNA_1049	BMgn000231	0.85409
TUBB-1	gRNA_46617	BMgn009131	0.81189
TUBA	gRNA_21929	BMgn004681	0.72814
Dynein	gRNA_7149	BMgn001547	0.61182
RAB7	gRNA_29462	BMgn006045	0.53697
v-ATPase-e3	gRNA_76200	BMgn014507	0.4874
Dynein	gRNA_7147	BMgn001547	0.42477
v-ATPase-e4	gRNA_76201	BMgn014507	0.41182
Rac	gRNA_35348	BMgn007110	0.38511
v-ATPase-D4	gRNA_7354	BMgn001592	0.38249
Dynein-3	gRNA_10937	BMgn002375	0.30289
LAMP	gRNA_29561	BMgn006063	0.28457
v-ATPase-A	gRNA_41940	BMgn008295	0.12185
v-ATPase-116 kDa-1	gRNA_2268	BMgn000489	0.10177
Dynein-4	gRNA_4203	BMgn000913	0.098361
Rab8	gRNA_38713	BMgn007712	0.01559
